# Supplementary material for: Impact of Heat Stress on Expression of Wheat Genes Responsive to Hessian Fly Infestation
Source: Plants (Basel). 2022 May 25;11(11):1402. doi: 10.3390/plants11111402 (PMC9183101; doi:10.3390/plants11111402)
Supplement: Supplementary file 1 [file plants-11-01402-s001.zip]

Archive with 7 entries (7 files):
- Table S1.xlsx
- Table S2.xlsx
- Table S3.xlsx
- Table S4.xlsx
- Table S5.pdf
- Table S6.pdf
- Table S7.pdf
