# Supplementary material for: Impact of Heat Stress on Expression of Wheat Genes Responsive to Hessian Fly Infestation
Source: Plants (Basel). 2022 May 25;11(11):1402. doi: 10.3390/plants11111402 (PMC9183101; doi:10.3390/plants11111402)
Supplement: Supplementary file 1 [file plants-11-01402-s001.zip › Table S1.xlsx]

## Sheet: Table S1
Table S1. Significantly enriched GO terms with upregualted DEGs due to heat stress (Heat vs CK comparison).
GO_accession	Description	Term_type	Over_represented_pValue	Corrected_pValue	DEG_item	DEG_list	Bg_item	Bg_list	Gene_names
GO:0009408	response to heat	biological_process	7.9298e-13	5.3304e-09	19	1156	140	74606	TRIAE_CS42_4DL_TGACv1_343575_AA1136840,TRIAE_CS42_5BL_TGACv1_404481_AA1301430,TRIAE_CS42_4BL_TGACv1_321796_AA1065580,TRIAE_CS42_5DL_TGACv1_433267_AA1407610,TRIAE_CS42_5BL_TGACv1_407726_AA1359190,TRIAE_CS42_7AL_TGACv1_557440_AA1781370,TRIAE_CS42_6DL_TGACv1_529086_AA1717390,TRIAE_CS42_4BS_TGACv1_329487_AA1101840,TRIAE_CS42_2AL_TGACv1_093114_AA0272280,TRIAE_CS42_4DL_TGACv1_343907_AA1141350,TRIAE_CS4…
GO:0009266	response to temperature stimulus	biological_process	1.1765e-10	2.5027e-07	24	1156	304	74606	TRIAE_CS42_5BL_TGACv1_407726_AA1359190,TRIAE_CS42_5DL_TGACv1_433267_AA1407610,TRIAE_CS42_5BL_TGACv1_404481_AA1301430,TRIAE_CS42_4BL_TGACv1_321796_AA1065580,TRIAE_CS42_7BS_TGACv1_592503_AA1939380,TRIAE_CS42_4DL_TGACv1_343575_AA1136840,TRIAE_CS42_6DL_TGACv1_529086_AA1717390,TRIAE_CS42_7AL_TGACv1_557440_AA1781370,TRIAE_CS42_4BS_TGACv1_329487_AA1101840,TRIAE_CS42_3AL_TGACv1_194123_AA0626970,TRIAE_CS4…
GO:0004557	alpha-galactosidase activity	molecular_function	1.4892e-10	2.5027e-07	9	1156	26	74606	TRIAE_CS42_1AL_TGACv1_001127_AA0025460,TRIAE_CS42_2BS_TGACv1_145886_AA0448110,TRIAE_CS42_3B_TGACv1_220634_AA0712980,TRIAE_CS42_2DS_TGACv1_179406_AA0606800,TRIAE_CS42_3AS_TGACv1_211472_AA0690490,TRIAE_CS42_U_TGACv1_641952_AA2108170,TRIAE_CS42_1BL_TGACv1_033598_AA0140580,TRIAE_CS42_1DL_TGACv1_063732_AA0230310,TRIAE_CS42_3DS_TGACv1_273808_AA0933540
GO:0052692	raffinose alpha-galactosidase activity	molecular_function	1.4892e-10	2.5027e-07	9	1156	26	74606	TRIAE_CS42_3DS_TGACv1_273808_AA0933540,TRIAE_CS42_1BL_TGACv1_033598_AA0140580,TRIAE_CS42_1DL_TGACv1_063732_AA0230310,TRIAE_CS42_U_TGACv1_641952_AA2108170,TRIAE_CS42_3AS_TGACv1_211472_AA0690490,TRIAE_CS42_2DS_TGACv1_179406_AA0606800,TRIAE_CS42_3B_TGACv1_220634_AA0712980,TRIAE_CS42_2BS_TGACv1_145886_AA0448110,TRIAE_CS42_1AL_TGACv1_001127_AA0025460
GO:0005385	zinc ion transmembrane transporter activity	molecular_function	7.3303e-09	9.8548e-06	9	1156	39	74606	TRIAE_CS42_7AL_TGACv1_558847_AA1796430,TRIAE_CS42_1DS_TGACv1_082535_AA0264750,TRIAE_CS42_1AS_TGACv1_018996_AA0057560,TRIAE_CS42_1DS_TGACv1_082083_AA0263760,TRIAE_CS42_7BL_TGACv1_577920_AA1886220,TRIAE_CS42_1BS_TGACv1_049369_AA0150920,TRIAE_CS42_2BL_TGACv1_129658_AA0391920,TRIAE_CS42_7DL_TGACv1_603327_AA1981040,TRIAE_CS42_7AL_TGACv1_558208_AA1791260
GO:0071577	zinc II ion transmembrane transport	biological_process	9.4415e-09	1.0578e-05	9	1156	40	74606	TRIAE_CS42_7BL_TGACv1_577920_AA1886220,TRIAE_CS42_1DS_TGACv1_082535_AA0264750,TRIAE_CS42_1AS_TGACv1_018996_AA0057560,TRIAE_CS42_1DS_TGACv1_082083_AA0263760,TRIAE_CS42_7AL_TGACv1_558847_AA1796430,TRIAE_CS42_7AL_TGACv1_558208_AA1791260,TRIAE_CS42_7DL_TGACv1_603327_AA1981040,TRIAE_CS42_2BL_TGACv1_129658_AA0391920,TRIAE_CS42_1BS_TGACv1_049369_AA0150920
GO:0006829	zinc II ion transport	biological_process	1.8398e-08	1.7667e-05	9	1156	43	74606	TRIAE_CS42_2BL_TGACv1_129658_AA0391920,TRIAE_CS42_1BS_TGACv1_049369_AA0150920,TRIAE_CS42_7DL_TGACv1_603327_AA1981040,TRIAE_CS42_7AL_TGACv1_558208_AA1791260,TRIAE_CS42_7AL_TGACv1_558847_AA1796430,TRIAE_CS42_1AS_TGACv1_018996_AA0057560,TRIAE_CS42_1DS_TGACv1_082535_AA0264750,TRIAE_CS42_1DS_TGACv1_082083_AA0263760,TRIAE_CS42_7BL_TGACv1_577920_AA1886220
GO:0006457	protein folding	biological_process	3.2234e-08	2.7085e-05	21	1156	314	74606	TRIAE_CS42_7BL_TGACv1_580569_AA1914600,TRIAE_CS42_3B_TGACv1_221409_AA0740000,TRIAE_CS42_5AL_TGACv1_375669_AA1225330,TRIAE_CS42_6BL_TGACv1_500696_AA1608510,TRIAE_CS42_1AL_TGACv1_003472_AA0049980,TRIAE_CS42_3DL_TGACv1_249716_AA0855170,TRIAE_CS42_5BL_TGACv1_408212_AA1362270,TRIAE_CS42_2DS_TGACv1_177184_AA0568130,TRIAE_CS42_6DL_TGACv1_529086_AA1717390,TRIAE_CS42_5BL_TGACv1_407726_AA1359190,TRIAE_CS42…
GO:0051082	unfolded protein binding	molecular_function	6.9311e-08	5.1768e-05	15	1156	165	74606	TRIAE_CS42_4BL_TGACv1_320724_AA1047170,TRIAE_CS42_6BL_TGACv1_500696_AA1608510,TRIAE_CS42_1AL_TGACv1_003472_AA0049980,TRIAE_CS42_3DL_TGACv1_249716_AA0855170,TRIAE_CS42_2BS_TGACv1_146201_AA0458690,TRIAE_CS42_5AL_TGACv1_375669_AA1225330,TRIAE_CS42_3B_TGACv1_221409_AA0740000,TRIAE_CS42_2AS_TGACv1_112882_AA0346490,TRIAE_CS42_6AL_TGACv1_472182_AA1518680,TRIAE_CS42_5BL_TGACv1_407726_AA1359190,TRIAE_CS42…
GO:0000041	transition metal ion transport	biological_process	8.9256e-08	5.9998e-05	12	1156	106	74606	TRIAE_CS42_U_TGACv1_641589_AA2098880,TRIAE_CS42_1BS_TGACv1_049369_AA0150920,TRIAE_CS42_5DL_TGACv1_433809_AA1422730,TRIAE_CS42_2BL_TGACv1_129658_AA0391920,TRIAE_CS42_7DL_TGACv1_603327_AA1981040,TRIAE_CS42_7AL_TGACv1_558208_AA1791260,TRIAE_CS42_7AL_TGACv1_558847_AA1796430,TRIAE_CS42_5DL_TGACv1_433022_AA1398550,TRIAE_CS42_1DS_TGACv1_082083_AA0263760,TRIAE_CS42_1AS_TGACv1_018996_AA0057560,TRIAE_CS42_…
GO:0015925	galactosidase activity	molecular_function	1.168e-07	7.1378e-05	10	1156	66	74606	TRIAE_CS42_3DS_TGACv1_273808_AA0933540,TRIAE_CS42_7AS_TGACv1_569973_AA1827990,TRIAE_CS42_1DL_TGACv1_063732_AA0230310,TRIAE_CS42_1BL_TGACv1_033598_AA0140580,TRIAE_CS42_U_TGACv1_641952_AA2108170,TRIAE_CS42_2DS_TGACv1_179406_AA0606800,TRIAE_CS42_3AS_TGACv1_211472_AA0690490,TRIAE_CS42_3B_TGACv1_220634_AA0712980,TRIAE_CS42_2BS_TGACv1_145886_AA0448110,TRIAE_CS42_1AL_TGACv1_001127_AA0025460
GO:0048584	positive regulation of response to stimulus	biological_process	2.4876e-07	0.0001324	15	1156	183	74606	TRIAE_CS42_3DL_TGACv1_249716_AA0855170,TRIAE_CS42_3AL_TGACv1_194149_AA0627480,TRIAE_CS42_3DL_TGACv1_249320_AA0845360,TRIAE_CS42_3B_TGACv1_221115_AA0730720,TRIAE_CS42_3B_TGACv1_221409_AA0740000,TRIAE_CS42_3AL_TGACv1_194123_AA0626970,TRIAE_CS42_7DL_TGACv1_602991_AA1973350,TRIAE_CS42_4BS_TGACv1_327925_AA1078970,TRIAE_CS42_4DS_TGACv1_361684_AA1171560,TRIAE_CS42_1DL_TGACv1_063179_AA0224700,TRIAE_CS42_…
GO:0009628	response to abiotic stimulus	biological_process	2.5605e-07	0.0001324	40	1156	1039	74606	TRIAE_CS42_6AL_TGACv1_472182_AA1518680,TRIAE_CS42_5DL_TGACv1_436785_AA1463200,TRIAE_CS42_3DL_TGACv1_249320_AA0845360,TRIAE_CS42_4BS_TGACv1_327925_AA1078970,TRIAE_CS42_U_TGACv1_643016_AA2126240,TRIAE_CS42_7BS_TGACv1_593428_AA1951470,TRIAE_CS42_4AS_TGACv1_308098_AA1025760,TRIAE_CS42_3AL_TGACv1_194123_AA0626970,TRIAE_CS42_4AS_TGACv1_307652_AA1022370,TRIAE_CS42_2AL_TGACv1_095565_AA0312150,TRIAE_CS42_…
GO:0046915	transition metal ion transmembrane transporter activity	molecular_function	2.6741e-06	0.0012783	9	1156	76	74606	TRIAE_CS42_7AL_TGACv1_558208_AA1791260,TRIAE_CS42_7DL_TGACv1_603327_AA1981040,TRIAE_CS42_2BL_TGACv1_129658_AA0391920,TRIAE_CS42_1BS_TGACv1_049369_AA0150920,TRIAE_CS42_7BL_TGACv1_577920_AA1886220,TRIAE_CS42_1DS_TGACv1_082535_AA0264750,TRIAE_CS42_1AS_TGACv1_018996_AA0057560,TRIAE_CS42_1DS_TGACv1_082083_AA0263760,TRIAE_CS42_7AL_TGACv1_558847_AA1796430
GO:0042542	response to hydrogen peroxide	biological_process	2.8525e-06	0.0012783	6	1156	27	74606	TRIAE_CS42_4DL_TGACv1_343907_AA1141350,TRIAE_CS42_6DS_TGACv1_542805_AA1730740,TRIAE_CS42_4AS_TGACv1_307652_AA1022370,TRIAE_CS42_4BS_TGACv1_329487_AA1101840,TRIAE_CS42_4DL_TGACv1_343575_AA1136840,TRIAE_CS42_U_TGACv1_643016_AA2126240
GO:0019135	deoxyhypusine monooxygenase activity	molecular_function	3.6269e-06	0.0015237	3	1156	3	74606	TRIAE_CS42_6DL_TGACv1_526960_AA1696120,TRIAE_CS42_U_TGACv1_642459_AA2117930,TRIAE_CS42_6AL_TGACv1_472548_AA1523440
GO:0008470	isovaleryl-CoA dehydrogenase activity	molecular_function	4.4179e-06	0.0015833	3	1156	3	74606	TRIAE_CS42_1BS_TGACv1_049760_AA0160990,TRIAE_CS42_1AS_TGACv1_019383_AA0065910,TRIAE_CS42_1DS_TGACv1_080324_AA0245930
GO:0033530	raffinose metabolic process	biological_process	4.4752e-06	0.0015833	3	1156	3	74606	TRIAE_CS42_3AS_TGACv1_211472_AA0690490,TRIAE_CS42_3DS_TGACv1_273808_AA0933540,TRIAE_CS42_3B_TGACv1_220634_AA0712980
GO:0034484	raffinose catabolic process	biological_process	4.4752e-06	0.0015833	3	1156	3	74606	TRIAE_CS42_3DS_TGACv1_273808_AA0933540,TRIAE_CS42_3AS_TGACv1_211472_AA0690490,TRIAE_CS42_3B_TGACv1_220634_AA0712980
GO:0072509	divalent inorganic cation transmembrane transporter activity	molecular_function	6.6659e-06	0.0022404	11	1156	127	74606	TRIAE_CS42_7DL_TGACv1_603327_AA1981040,TRIAE_CS42_7AL_TGACv1_558208_AA1791260,TRIAE_CS42_5DL_TGACv1_434439_AA1436060,TRIAE_CS42_1BS_TGACv1_049369_AA0150920,TRIAE_CS42_2BL_TGACv1_129658_AA0391920,TRIAE_CS42_7BL_TGACv1_577920_AA1886220,TRIAE_CS42_2DL_TGACv1_159178_AA0533860,TRIAE_CS42_7AL_TGACv1_558847_AA1796430,TRIAE_CS42_1AS_TGACv1_018996_AA0057560,TRIAE_CS42_1DS_TGACv1_082535_AA0264750,TRIAE_CS4…
GO:0004867	serine-type endopeptidase inhibitor activity	molecular_function	7.0579e-06	0.0022592	12	1156	181	74606	TRIAE_CS42_3AS_TGACv1_212619_AA0702120,TRIAE_CS42_3B_TGACv1_220723_AA0716830,TRIAE_CS42_3AS_TGACv1_212619_AA0702130,TRIAE_CS42_3B_TGACv1_220651_AA0713900,TRIAE_CS42_5AL_TGACv1_375760_AA1226770,TRIAE_CS42_3DS_TGACv1_274198_AA0935020,TRIAE_CS42_5DL_TGACv1_436444_AA1461030,TRIAE_CS42_3DS_TGACv1_274198_AA0935000,TRIAE_CS42_1AS_TGACv1_019165_AA0061930,TRIAE_CS42_3AS_TGACv1_211110_AA0685170,TRIAE_CS42_…
GO:0016157	sucrose synthase activity	molecular_function	1.0409e-05	0.0029209	6	1156	31	74606	TRIAE_CS42_4DL_TGACv1_345311_AA1152660,TRIAE_CS42_4DL_TGACv1_345406_AA1153090,TRIAE_CS42_U_TGACv1_641879_AA2106520,TRIAE_CS42_5DL_TGACv1_432989_AA1397030,TRIAE_CS42_7AS_TGACv1_570668_AA1839220,TRIAE_CS42_7BS_TGACv1_591812_AA1922120
GO:0070838	divalent metal ion transport	biological_process	1.0429e-05	0.0029209	11	1156	133	74606	TRIAE_CS42_7DL_TGACv1_603327_AA1981040,TRIAE_CS42_7AL_TGACv1_558208_AA1791260,TRIAE_CS42_5DL_TGACv1_434439_AA1436060,TRIAE_CS42_1BS_TGACv1_049369_AA0150920,TRIAE_CS42_2BL_TGACv1_129658_AA0391920,TRIAE_CS42_7BL_TGACv1_577920_AA1886220,TRIAE_CS42_2DL_TGACv1_159178_AA0533860,TRIAE_CS42_7AL_TGACv1_558847_AA1796430,TRIAE_CS42_1AS_TGACv1_018996_AA0057560,TRIAE_CS42_1DS_TGACv1_082535_AA0264750,TRIAE_CS4…
GO:0072511	divalent inorganic cation transport	biological_process	1.0429e-05	0.0029209	11	1156	133	74606	TRIAE_CS42_7DL_TGACv1_603327_AA1981040,TRIAE_CS42_7AL_TGACv1_558208_AA1791260,TRIAE_CS42_5DL_TGACv1_434439_AA1436060,TRIAE_CS42_1BS_TGACv1_049369_AA0150920,TRIAE_CS42_2BL_TGACv1_129658_AA0391920,TRIAE_CS42_7BL_TGACv1_577920_AA1886220,TRIAE_CS42_2DL_TGACv1_159178_AA0533860,TRIAE_CS42_7AL_TGACv1_558847_AA1796430,TRIAE_CS42_1DS_TGACv1_082535_AA0264750,TRIAE_CS42_1AS_TGACv1_018996_AA0057560,TRIAE_CS4…
GO:0048518	positive regulation of biological process	biological_process	1.1236e-05	0.0029421	31	1156	841	74606	TRIAE_CS42_4BS_TGACv1_329198_AA1098860,TRIAE_CS42_1DL_TGACv1_063179_AA0224700,TRIAE_CS42_5AL_TGACv1_376789_AA1240970,TRIAE_CS42_7DL_TGACv1_602991_AA1973350,TRIAE_CS42_4AL_TGACv1_291496_AA0994890,TRIAE_CS42_2AL_TGACv1_094081_AA0292300,TRIAE_CS42_4AL_TGACv1_292230_AA0998160,TRIAE_CS42_1AL_TGACv1_001774_AA0034980,TRIAE_CS42_1DL_TGACv1_062077_AA0208400,TRIAE_CS42_4AL_TGACv1_290598_AA0987290,TRIAE_CS4…
GO:0080134	regulation of response to stress	biological_process	1.138e-05	0.0029421	14	1156	220	74606	TRIAE_CS42_7DS_TGACv1_623930_AA2057550,TRIAE_CS42_7AL_TGACv1_557477_AA1781780,TRIAE_CS42_4AL_TGACv1_292230_AA0998160,TRIAE_CS42_7DL_TGACv1_602991_AA1973350,TRIAE_CS42_4DS_TGACv1_361684_AA1171560,TRIAE_CS42_4BS_TGACv1_327925_AA1078970,TRIAE_CS42_1DL_TGACv1_063179_AA0224700,TRIAE_CS42_3AL_TGACv1_193848_AA0620880,TRIAE_CS42_3B_TGACv1_221409_AA0740000,TRIAE_CS42_3B_TGACv1_221115_AA0730720,TRIAE_CS42_…
GO:0046872	metal ion binding	molecular_function	1.3153e-05	0.0032746	197	1156	9455	74606	TRIAE_CS42_6BS_TGACv1_514206_AA1656930,TRIAE_CS42_1BL_TGACv1_032156_AA0126110,TRIAE_CS42_7DL_TGACv1_603647_AA1986740,TRIAE_CS42_3B_TGACv1_223221_AA0778170,TRIAE_CS42_3DS_TGACv1_272680_AA0923800,TRIAE_CS42_2AL_TGACv1_094371_AA0296640,TRIAE_CS42_4AL_TGACv1_288984_AA0962690,TRIAE_CS42_5DL_TGACv1_439685_AA1469020,TRIAE_CS42_5DL_TGACv1_437141_AA1465380,TRIAE_CS42_5BL_TGACv1_408656_AA1364050,TRIAE_CS42…
GO:0043169	cation binding	molecular_function	1.5536e-05	0.0037297	197	1156	9480	74606	TRIAE_CS42_7BL_TGACv1_579265_AA1905890,TRIAE_CS42_7AS_TGACv1_571730_AA1849540,TRIAE_CS42_5DL_TGACv1_433022_AA1398550,TRIAE_CS42_2AL_TGACv1_092982_AA0268590,TRIAE_CS42_4BS_TGACv1_329198_AA1098860,TRIAE_CS42_2BL_TGACv1_132352_AA0436980,TRIAE_CS42_5DL_TGACv1_434426_AA1435740,TRIAE_CS42_U_TGACv1_641728_AA2102660,TRIAE_CS42_4AL_TGACv1_288918_AA0961380,TRIAE_CS42_7BL_TGACv1_577355_AA1873220,TRIAE_CS42_…
GO:0009311	oligosaccharide metabolic process	biological_process	2.1577e-05	0.0050014	11	1156	142	74606	TRIAE_CS42_3DS_TGACv1_273808_AA0933540,TRIAE_CS42_7BS_TGACv1_591812_AA1922120,TRIAE_CS42_1BL_TGACv1_031448_AA0114300,TRIAE_CS42_4DL_TGACv1_345311_AA1152660,TRIAE_CS42_5DL_TGACv1_432989_AA1397030,TRIAE_CS42_3AS_TGACv1_211472_AA0690490,TRIAE_CS42_1DL_TGACv1_061682_AA0201620,TRIAE_CS42_7AS_TGACv1_570668_AA1839220,TRIAE_CS42_3B_TGACv1_220634_AA0712980,TRIAE_CS42_U_TGACv1_641879_AA2106520,TRIAE_CS42_4…
GO:0006950	response to stress	biological_process	2.8566e-05	0.0064006	77	1156	3103	74606	TRIAE_CS42_2AS_TGACv1_112882_AA0346490,TRIAE_CS42_U_TGACv1_640869_AA2077820,TRIAE_CS42_7AS_TGACv1_570182_AA1831770,TRIAE_CS42_2BS_TGACv1_146201_AA0458690,TRIAE_CS42_1BL_TGACv1_030456_AA0091220,TRIAE_CS42_3DL_TGACv1_249291_AA0844360,TRIAE_CS42_7AL_TGACv1_557477_AA1781780,TRIAE_CS42_3DS_TGACv1_273808_AA0933540,TRIAE_CS42_6DS_TGACv1_543111_AA1735540,TRIAE_CS42_5AL_TGACv1_375669_AA1225330,TRIAE_CS42_…
GO:0005534	galactose binding	molecular_function	3.1101e-05	0.0067438	4	1156	12	74606	TRIAE_CS42_4AL_TGACv1_290348_AA0984350,TRIAE_CS42_6AS_TGACv1_487596_AA1571710,TRIAE_CS42_6BS_TGACv1_514607_AA1662210,TRIAE_CS42_6DS_TGACv1_543704_AA1743270
GO:0031347	regulation of defense response	biological_process	3.5486e-05	0.0074543	10	1156	128	74606	TRIAE_CS42_3AL_TGACv1_194123_AA0626970,TRIAE_CS42_3B_TGACv1_221115_AA0730720,TRIAE_CS42_3B_TGACv1_221409_AA0740000,TRIAE_CS42_3DL_TGACv1_249320_AA0845360,TRIAE_CS42_3DL_TGACv1_249716_AA0855170,TRIAE_CS42_3AL_TGACv1_194149_AA0627480,TRIAE_CS42_7AL_TGACv1_557477_AA1781780,TRIAE_CS42_1DL_TGACv1_063179_AA0224700,TRIAE_CS42_3AL_TGACv1_193848_AA0620880,TRIAE_CS42_7DL_TGACv1_602991_AA1973350
GO:0002684	positive regulation of immune system process	biological_process	5.7554e-05	0.011054	6	1156	43	74606	TRIAE_CS42_3B_TGACv1_221409_AA0740000,TRIAE_CS42_7AL_TGACv1_557477_AA1781780,TRIAE_CS42_1DL_TGACv1_063179_AA0224700,TRIAE_CS42_3AL_TGACv1_193848_AA0620880,TRIAE_CS42_3DL_TGACv1_249716_AA0855170,TRIAE_CS42_7DL_TGACv1_602991_AA1973350
GO:0045089	positive regulation of innate immune response	biological_process	5.7554e-05	0.011054	6	1156	43	74606	TRIAE_CS42_3DL_TGACv1_249716_AA0855170,TRIAE_CS42_7DL_TGACv1_602991_AA1973350,TRIAE_CS42_1DL_TGACv1_063179_AA0224700,TRIAE_CS42_3AL_TGACv1_193848_AA0620880,TRIAE_CS42_3B_TGACv1_221409_AA0740000,TRIAE_CS42_7AL_TGACv1_557477_AA1781780
GO:0050778	positive regulation of immune response	biological_process	5.7554e-05	0.011054	6	1156	43	74606	TRIAE_CS42_7AL_TGACv1_557477_AA1781780,TRIAE_CS42_3B_TGACv1_221409_AA0740000,TRIAE_CS42_3AL_TGACv1_193848_AA0620880,TRIAE_CS42_1DL_TGACv1_063179_AA0224700,TRIAE_CS42_3DL_TGACv1_249716_AA0855170,TRIAE_CS42_7DL_TGACv1_602991_AA1973350
GO:0009916	alternative oxidase activity	molecular_function	6.6034e-05	0.01233	4	1156	15	74606	TRIAE_CS42_6DL_TGACv1_528632_AA1715280,TRIAE_CS42_2BL_TGACv1_132767_AA0439680,TRIAE_CS42_2AL_TGACv1_093624_AA0283900,TRIAE_CS42_2DL_TGACv1_159044_AA0531270
GO:0004553	hydrolase activity, hydrolyzing O-glycosyl compounds	molecular_function	6.7975e-05	0.012349	41	1156	1349	74606	TRIAE_CS42_5BS_TGACv1_423277_AA1373030,TRIAE_CS42_7DL_TGACv1_603128_AA1976400,TRIAE_CS42_5BL_TGACv1_404785_AA1310760,TRIAE_CS42_5BS_TGACv1_423277_AA1373020,TRIAE_CS42_7AS_TGACv1_570274_AA1833190,TRIAE_CS42_2DL_TGACv1_160035_AA0545840,TRIAE_CS42_3AS_TGACv1_211994_AA0696540,TRIAE_CS42_5DL_TGACv1_433930_AA1425470,TRIAE_CS42_4DL_TGACv1_342613_AA1118140,TRIAE_CS42_1DL_TGACv1_062036_AA0207880,TRIAE_CS4…
GO:1901002	positive regulation of response to salt stress	biological_process	7.2626e-05	0.012847	6	1156	45	74606	TRIAE_CS42_3B_TGACv1_221115_AA0730720,TRIAE_CS42_3AL_TGACv1_194123_AA0626970,TRIAE_CS42_4AL_TGACv1_292230_AA0998160,TRIAE_CS42_4DS_TGACv1_361684_AA1171560,TRIAE_CS42_4BS_TGACv1_327925_AA1078970,TRIAE_CS42_3DL_TGACv1_249320_AA0845360
GO:0003995	acyl-CoA dehydrogenase activity	molecular_function	8.1875e-05	0.013606	3	1156	6	74606	TRIAE_CS42_1AS_TGACv1_019383_AA0065910,TRIAE_CS42_1BS_TGACv1_049760_AA0160990,TRIAE_CS42_1DS_TGACv1_080324_AA0245930
GO:0016892	endoribonuclease activity, producing 3'-phosphomonoesters	molecular_function	8.4052e-05	0.013606	5	1156	31	74606	TRIAE_CS42_7BL_TGACv1_581900_AA1917960,TRIAE_CS42_1DL_TGACv1_061521_AA0197680,TRIAE_CS42_1AL_TGACv1_726018_AA2170150,TRIAE_CS42_1BL_TGACv1_031299_AA0111060,TRIAE_CS42_1AL_TGACv1_000853_AA0020390
GO:0006552	leucine catabolic process	biological_process	8.4644e-05	0.013606	3	1156	6	74606	TRIAE_CS42_1BS_TGACv1_049760_AA0160990,TRIAE_CS42_1AS_TGACv1_019383_AA0065910,TRIAE_CS42_1DS_TGACv1_080324_AA0245930
GO:0051262	protein tetramerization	biological_process	8.5015e-05	0.013606	3	1156	6	74606	TRIAE_CS42_7BS_TGACv1_591812_AA1922120,TRIAE_CS42_7AS_TGACv1_570668_AA1839220,TRIAE_CS42_5DL_TGACv1_432989_AA1397030
GO:0009644	response to high light intensity	biological_process	0.00011872	0.018157	6	1156	52	74606	TRIAE_CS42_4DL_TGACv1_343907_AA1141350,TRIAE_CS42_6DS_TGACv1_542805_AA1730740,TRIAE_CS42_4AS_TGACv1_307652_AA1022370,TRIAE_CS42_4DL_TGACv1_343575_AA1136840,TRIAE_CS42_4BS_TGACv1_329487_AA1101840,TRIAE_CS42_U_TGACv1_643016_AA2126240
GO:1901000	regulation of response to salt stress	biological_process	0.00011885	0.018157	6	1156	49	74606	TRIAE_CS42_3DL_TGACv1_249320_AA0845360,TRIAE_CS42_4DS_TGACv1_361684_AA1171560,TRIAE_CS42_4BS_TGACv1_327925_AA1078970,TRIAE_CS42_3AL_TGACv1_194123_AA0626970,TRIAE_CS42_4AL_TGACv1_292230_AA0998160,TRIAE_CS42_3B_TGACv1_221115_AA0730720
GO:0005985	sucrose metabolic process	biological_process	0.00013242	0.01978	6	1156	48	74606	TRIAE_CS42_7BS_TGACv1_591812_AA1922120,TRIAE_CS42_U_TGACv1_641879_AA2106520,TRIAE_CS42_4DL_TGACv1_345406_AA1153090,TRIAE_CS42_5DL_TGACv1_432989_AA1397030,TRIAE_CS42_4DL_TGACv1_345311_AA1152660,TRIAE_CS42_7AS_TGACv1_570668_AA1839220
GO:0047484	regulation of response to osmotic stress	biological_process	0.00014968	0.021873	6	1156	51	74606	TRIAE_CS42_4DS_TGACv1_361684_AA1171560,TRIAE_CS42_4BS_TGACv1_327925_AA1078970,TRIAE_CS42_3DL_TGACv1_249320_AA0845360,TRIAE_CS42_3B_TGACv1_221115_AA0730720,TRIAE_CS42_4AL_TGACv1_292230_AA0998160,TRIAE_CS42_3AL_TGACv1_194123_AA0626970
GO:0031349	positive regulation of defense response	biological_process	0.00017304	0.023586	6	1156	52	74606	TRIAE_CS42_7DL_TGACv1_602991_AA1973350,TRIAE_CS42_3DL_TGACv1_249716_AA0855170,TRIAE_CS42_3AL_TGACv1_193848_AA0620880,TRIAE_CS42_1DL_TGACv1_063179_AA0224700,TRIAE_CS42_7AL_TGACv1_557477_AA1781780,TRIAE_CS42_3B_TGACv1_221409_AA0740000
GO:0003839	gamma-glutamylcyclotransferase activity	molecular_function	0.00017554	0.023586	3	1156	8	74606	TRIAE_CS42_6BS_TGACv1_515352_AA1669520,TRIAE_CS42_U_TGACv1_645945_AA2145750,TRIAE_CS42_6AS_TGACv1_485230_AA1540950
GO:0006751	glutathione catabolic process	biological_process	0.00019646	0.023586	4	1156	19	74606	TRIAE_CS42_6BL_TGACv1_499406_AA1581680,TRIAE_CS42_6BS_TGACv1_515352_AA1669520,TRIAE_CS42_U_TGACv1_645945_AA2145750,TRIAE_CS42_6AS_TGACv1_485230_AA1540950
GO:0043171	peptide catabolic process	biological_process	0.00019646	0.023586	4	1156	19	74606	TRIAE_CS42_6AS_TGACv1_485230_AA1540950,TRIAE_CS42_U_TGACv1_645945_AA2145750,TRIAE_CS42_6BS_TGACv1_515352_AA1669520,TRIAE_CS42_6BL_TGACv1_499406_AA1581680
GO:0004866	endopeptidase inhibitor activity	molecular_function	0.00019745	0.023586	13	1156	292	74606	TRIAE_CS42_3AS_TGACv1_211110_AA0685170,TRIAE_CS42_U_TGACv1_643301_AA2130450,TRIAE_CS42_3AS_TGACv1_212035_AA0696960,TRIAE_CS42_3DS_TGACv1_274198_AA0935000,TRIAE_CS42_1AS_TGACv1_019165_AA0061930,TRIAE_CS42_3B_TGACv1_220651_AA0713900,TRIAE_CS42_3DS_TGACv1_274198_AA0935020,TRIAE_CS42_5AL_TGACv1_375760_AA1226770,TRIAE_CS42_2DS_TGACv1_177679_AA0582330,TRIAE_CS42_5DL_TGACv1_436444_AA1461030,TRIAE_CS42_3…
GO:0010466	negative regulation of peptidase activity	biological_process	0.00019745	0.023586	13	1156	292	74606	TRIAE_CS42_3B_TGACv1_220723_AA0716830,TRIAE_CS42_3AS_TGACv1_212619_AA0702130,TRIAE_CS42_3AS_TGACv1_212619_AA0702120,TRIAE_CS42_3B_TGACv1_220651_AA0713900,TRIAE_CS42_2DS_TGACv1_177679_AA0582330,TRIAE_CS42_5DL_TGACv1_436444_AA1461030,TRIAE_CS42_5AL_TGACv1_375760_AA1226770,TRIAE_CS42_3DS_TGACv1_274198_AA0935020,TRIAE_CS42_3DS_TGACv1_274198_AA0935000,TRIAE_CS42_1AS_TGACv1_019165_AA0061930,TRIAE_CS42_…
GO:0010951	negative regulation of endopeptidase activity	biological_process	0.00019745	0.023586	13	1156	292	74606	TRIAE_CS42_3B_TGACv1_220723_AA0716830,TRIAE_CS42_3AS_TGACv1_212619_AA0702120,TRIAE_CS42_3AS_TGACv1_212619_AA0702130,TRIAE_CS42_3B_TGACv1_220651_AA0713900,TRIAE_CS42_5AL_TGACv1_375760_AA1226770,TRIAE_CS42_3DS_TGACv1_274198_AA0935020,TRIAE_CS42_5DL_TGACv1_436444_AA1461030,TRIAE_CS42_2DS_TGACv1_177679_AA0582330,TRIAE_CS42_3DS_TGACv1_274198_AA0935000,TRIAE_CS42_1AS_TGACv1_019165_AA0061930,TRIAE_CS42_…
GO:0030414	peptidase inhibitor activity	molecular_function	0.00019745	0.023586	13	1156	292	74606	TRIAE_CS42_2DS_TGACv1_177679_AA0582330,TRIAE_CS42_5DL_TGACv1_436444_AA1461030,TRIAE_CS42_5AL_TGACv1_375760_AA1226770,TRIAE_CS42_3DS_TGACv1_274198_AA0935020,TRIAE_CS42_3B_TGACv1_220651_AA0713900,TRIAE_CS42_3AS_TGACv1_212619_AA0702120,TRIAE_CS42_3B_TGACv1_220723_AA0716830,TRIAE_CS42_3AS_TGACv1_212619_AA0702130,TRIAE_CS42_3AS_TGACv1_212035_AA0696960,TRIAE_CS42_U_TGACv1_643301_AA2130450,TRIAE_CS42_3A…
GO:0052548	regulation of endopeptidase activity	biological_process	0.00019745	0.023586	13	1156	292	74606	TRIAE_CS42_3AS_TGACv1_212035_AA0696960,TRIAE_CS42_3AS_TGACv1_211110_AA0685170,TRIAE_CS42_U_TGACv1_643301_AA2130450,TRIAE_CS42_1AS_TGACv1_019165_AA0061930,TRIAE_CS42_3DS_TGACv1_274198_AA0935000,TRIAE_CS42_3DS_TGACv1_274198_AA0935020,TRIAE_CS42_5AL_TGACv1_375760_AA1226770,TRIAE_CS42_2DS_TGACv1_177679_AA0582330,TRIAE_CS42_5DL_TGACv1_436444_AA1461030,TRIAE_CS42_3B_TGACv1_220651_AA0713900,TRIAE_CS42_3…
GO:0061135	endopeptidase regulator activity	molecular_function	0.00019745	0.023586	13	1156	292	74606	TRIAE_CS42_1AS_TGACv1_019165_AA0061930,TRIAE_CS42_3DS_TGACv1_274198_AA0935000,TRIAE_CS42_3AS_TGACv1_212035_AA0696960,TRIAE_CS42_U_TGACv1_643301_AA2130450,TRIAE_CS42_3AS_TGACv1_211110_AA0685170,TRIAE_CS42_3B_TGACv1_220723_AA0716830,TRIAE_CS42_3AS_TGACv1_212619_AA0702120,TRIAE_CS42_3AS_TGACv1_212619_AA0702130,TRIAE_CS42_5DL_TGACv1_436444_AA1461030,TRIAE_CS42_2DS_TGACv1_177679_AA0582330,TRIAE_CS42_5…
GO:0000302	response to reactive oxygen species	biological_process	0.0002	0.023586	8	1156	103	74606	TRIAE_CS42_4DL_TGACv1_343575_AA1136840,TRIAE_CS42_U_TGACv1_643016_AA2126240,TRIAE_CS42_7BS_TGACv1_593428_AA1951470,TRIAE_CS42_4BS_TGACv1_329487_AA1101840,TRIAE_CS42_4DL_TGACv1_343907_AA1141350,TRIAE_CS42_6DS_TGACv1_542805_AA1730740,TRIAE_CS42_4AS_TGACv1_307652_AA1022370,TRIAE_CS42_7AS_TGACv1_570182_AA1831770
GO:0010204	defense response signaling pathway, resistance gene-independent	biological_process	0.00020474	0.023729	3	1156	8	74606	TRIAE_CS42_3B_TGACv1_221409_AA0740000,TRIAE_CS42_3AL_TGACv1_193848_AA0620880,TRIAE_CS42_3DL_TGACv1_249716_AA0855170
GO:0016894	endonuclease activity, active with either ribo- or deoxyribonucleic acids and producing 3'-phosphomonoesters	molecular_function	0.00021828	0.024869	5	1156	37	74606	TRIAE_CS42_7BL_TGACv1_581900_AA1917960,TRIAE_CS42_1DL_TGACv1_061521_AA0197680,TRIAE_CS42_1AL_TGACv1_726018_AA2170150,TRIAE_CS42_1AL_TGACv1_000853_AA0020390,TRIAE_CS42_1BL_TGACv1_031299_AA0111060
GO:0052547	regulation of peptidase activity	biological_process	0.00023134	0.025163	13	1156	296	74606	TRIAE_CS42_1AS_TGACv1_019165_AA0061930,TRIAE_CS42_3DS_TGACv1_274198_AA0935000,TRIAE_CS42_3AS_TGACv1_212035_AA0696960,TRIAE_CS42_3AS_TGACv1_211110_AA0685170,TRIAE_CS42_U_TGACv1_643301_AA2130450,TRIAE_CS42_3B_TGACv1_220723_AA0716830,TRIAE_CS42_3AS_TGACv1_212619_AA0702130,TRIAE_CS42_3AS_TGACv1_212619_AA0702120,TRIAE_CS42_5AL_TGACv1_375760_AA1226770,TRIAE_CS42_3DS_TGACv1_274198_AA0935020,TRIAE_CS42_5…
GO:0061134	peptidase regulator activity	molecular_function	0.00023134	0.025163	13	1156	296	74606	TRIAE_CS42_3B_TGACv1_220651_AA0713900,TRIAE_CS42_5AL_TGACv1_375760_AA1226770,TRIAE_CS42_3DS_TGACv1_274198_AA0935020,TRIAE_CS42_5DL_TGACv1_436444_AA1461030,TRIAE_CS42_2DS_TGACv1_177679_AA0582330,TRIAE_CS42_3AS_TGACv1_212619_AA0702130,TRIAE_CS42_3B_TGACv1_220723_AA0716830,TRIAE_CS42_3AS_TGACv1_212619_AA0702120,TRIAE_CS42_3AS_TGACv1_211110_AA0685170,TRIAE_CS42_U_TGACv1_643301_AA2130450,TRIAE_CS42_3A…
GO:0031072	heat shock protein binding	molecular_function	0.00023209	0.025163	5	1156	36	74606	TRIAE_CS42_6DL_TGACv1_529086_AA1717390,TRIAE_CS42_5AL_TGACv1_375669_AA1225330,TRIAE_CS42_6AL_TGACv1_472182_AA1518680,TRIAE_CS42_5BL_TGACv1_407726_AA1359190,TRIAE_CS42_5DL_TGACv1_433267_AA1407610
GO:0009607	response to biotic stimulus	biological_process	0.00023844	0.025441	19	1156	484	74606	TRIAE_CS42_3B_TGACv1_223506_AA0783140,TRIAE_CS42_1DL_TGACv1_063179_AA0224700,TRIAE_CS42_7DL_TGACv1_602991_AA1973350,TRIAE_CS42_3AL_TGACv1_194123_AA0626970,TRIAE_CS42_3B_TGACv1_221409_AA0740000,TRIAE_CS42_3B_TGACv1_221115_AA0730720,TRIAE_CS42_U_TGACv1_641589_AA2098880,TRIAE_CS42_3AL_TGACv1_194149_AA0627480,TRIAE_CS42_3DL_TGACv1_249716_AA0855170,TRIAE_CS42_5AL_TGACv1_375873_AA1228260,TRIAE_CS42_7AL…
GO:0080167	response to karrikin	biological_process	0.00025862	0.027163	5	1156	37	74606	TRIAE_CS42_7BS_TGACv1_592503_AA1939380,TRIAE_CS42_3B_TGACv1_220634_AA0712980,TRIAE_CS42_3DS_TGACv1_273808_AA0933540,TRIAE_CS42_7DS_TGACv1_623278_AA2051560,TRIAE_CS42_3AS_TGACv1_211472_AA0690490
GO:0098542	defense response to other organism	biological_process	0.00027049	0.027973	15	1156	334	74606	TRIAE_CS42_7AL_TGACv1_557477_AA1781780,TRIAE_CS42_3B_TGACv1_223506_AA0783140,TRIAE_CS42_7DL_TGACv1_602991_AA1973350,TRIAE_CS42_2DL_TGACv1_157936_AA0502570,TRIAE_CS42_3AL_TGACv1_193848_AA0620880,TRIAE_CS42_U_TGACv1_640979_AA2081270,TRIAE_CS42_1DL_TGACv1_063179_AA0224700,TRIAE_CS42_3B_TGACv1_221409_AA0740000,TRIAE_CS42_3B_TGACv1_221115_AA0730720,TRIAE_CS42_3AL_TGACv1_194123_AA0626970,TRIAE_CS42_5AL…
GO:0009812	flavonoid metabolic process	biological_process	0.00029841	0.030393	5	1156	37	74606	TRIAE_CS42_3B_TGACv1_221409_AA0740000,TRIAE_CS42_4DL_TGACv1_344531_AA1147740,TRIAE_CS42_3DL_TGACv1_249716_AA0855170,TRIAE_CS42_2DL_TGACv1_157936_AA0502570,TRIAE_CS42_3AL_TGACv1_193848_AA0620880
GO:0009083	branched-chain amino acid catabolic process	biological_process	0.00032024	0.032129	3	1156	9	74606	TRIAE_CS42_1BS_TGACv1_049760_AA0160990,TRIAE_CS42_1AS_TGACv1_019383_AA0065910,TRIAE_CS42_1DS_TGACv1_080324_AA0245930
GO:0008270	zinc ion binding	molecular_function	0.00033392	0.033009	66	1156	2694	74606	TRIAE_CS42_2AS_TGACv1_112700_AA0343700,TRIAE_CS42_3AS_TGACv1_210619_AA0675750,TRIAE_CS42_7AL_TGACv1_556719_AA1769570,TRIAE_CS42_1DS_TGACv1_080563_AA0250250,TRIAE_CS42_2AS_TGACv1_112433_AA0337860,TRIAE_CS42_3DL_TGACv1_249241_AA0842890,TRIAE_CS42_1AS_TGACv1_020129_AA0075000,TRIAE_CS42_7BS_TGACv1_593588_AA1952750,TRIAE_CS42_5BL_TGACv1_404578_AA1304830,TRIAE_CS42_6BL_TGACv1_500079_AA1598440,TRIAE_CS4…
GO:0051346	negative regulation of hydrolase activity	biological_process	0.00036551	0.035608	13	1156	310	74606	TRIAE_CS42_3AS_TGACv1_212619_AA0702130,TRIAE_CS42_3B_TGACv1_220723_AA0716830,TRIAE_CS42_3AS_TGACv1_212619_AA0702120,TRIAE_CS42_2DS_TGACv1_177679_AA0582330,TRIAE_CS42_5DL_TGACv1_436444_AA1461030,TRIAE_CS42_5AL_TGACv1_375760_AA1226770,TRIAE_CS42_3DS_TGACv1_274198_AA0935020,TRIAE_CS42_3B_TGACv1_220651_AA0713900,TRIAE_CS42_1AS_TGACv1_019165_AA0061930,TRIAE_CS42_3DS_TGACv1_274198_AA0935000,TRIAE_CS42_…
GO:0033897	ribonuclease T2 activity	molecular_function	0.00043864	0.042122	4	1156	25	74606	TRIAE_CS42_1AL_TGACv1_726018_AA2170150,TRIAE_CS42_1BL_TGACv1_031299_AA0111060,TRIAE_CS42_1AL_TGACv1_000853_AA0020390,TRIAE_CS42_1DL_TGACv1_061521_AA0197680
GO:0016798	hydrolase activity, acting on glycosyl bonds	molecular_function	0.00044861	0.042472	42	1156	1530	74606	TRIAE_CS42_1DL_TGACv1_062036_AA0207880,TRIAE_CS42_3AS_TGACv1_211994_AA0696540,TRIAE_CS42_4DL_TGACv1_342613_AA1118140,TRIAE_CS42_5DL_TGACv1_433930_AA1425470,TRIAE_CS42_7AS_TGACv1_570274_AA1833190,TRIAE_CS42_2DL_TGACv1_160035_AA0545840,TRIAE_CS42_5BL_TGACv1_404785_AA1310760,TRIAE_CS42_5BS_TGACv1_423277_AA1373020,TRIAE_CS42_2AL_TGACv1_093273_AA0276420,TRIAE_CS42_5BS_TGACv1_423277_AA1373030,TRIAE_CS4…
GO:0045861	negative regulation of proteolysis	biological_process	0.00045878	0.042833	13	1156	316	74606	TRIAE_CS42_3AS_TGACv1_212035_AA0696960,TRIAE_CS42_U_TGACv1_643301_AA2130450,TRIAE_CS42_3AS_TGACv1_211110_AA0685170,TRIAE_CS42_1AS_TGACv1_019165_AA0061930,TRIAE_CS42_3DS_TGACv1_274198_AA0935000,TRIAE_CS42_2DS_TGACv1_177679_AA0582330,TRIAE_CS42_5DL_TGACv1_436444_AA1461030,TRIAE_CS42_5AL_TGACv1_375760_AA1226770,TRIAE_CS42_3DS_TGACv1_274198_AA0935020,TRIAE_CS42_3B_TGACv1_220651_AA0713900,TRIAE_CS42_3…
GO:0005984	disaccharide metabolic process	biological_process	0.00050214	0.046239	8	1156	112	74606	TRIAE_CS42_1DL_TGACv1_061682_AA0201620,TRIAE_CS42_U_TGACv1_641879_AA2106520,TRIAE_CS42_4DL_TGACv1_345406_AA1153090,TRIAE_CS42_7AS_TGACv1_570668_AA1839220,TRIAE_CS42_7BS_TGACv1_591812_AA1922120,TRIAE_CS42_4DL_TGACv1_345311_AA1152660,TRIAE_CS42_5DL_TGACv1_432989_AA1397030,TRIAE_CS42_1BL_TGACv1_031448_AA0114300
