# Supplementary material for: Impact of Heat Stress on Expression of Wheat Genes Responsive to Hessian Fly Infestation
Source: Plants (Basel). 2022 May 25;11(11):1402. doi: 10.3390/plants11111402 (PMC9183101; doi:10.3390/plants11111402)
Supplement: Supplementary file 1 [file plants-11-01402-s001.zip › Table S2.xlsx]

## Sheet: Table S2
Table S2. Significantly enriched GO terms with downregulated DEGs due to heat stress (Heat vs CK comparison).
GO_accession	Description	Term_type	Over_represented_pValue	Corrected_pValue	DEG_item	DEG_list	Bg_item	Bg_list	Gene_names
GO:0044815	DNA packaging complex	cellular_component	8.05327002721232e-322	5.4133982309792e-318	336	1928	565	74606	TRIAE_CS42_7BS_TGACv1_591878_AA1924260,TRIAE_CS42_4AS_TGACv1_307192_AA1018230,TRIAE_CS42_6DL_TGACv1_528182_AA1712240,TRIAE_CS42_6BS_TGACv1_513202_AA1634200,TRIAE_CS42_1BS_TGACv1_049375_AA0151120,TRIAE_CS42_7DL_TGACv1_605062_AA2004310,TRIAE_CS42_6AS_TGACv1_486132_AA1557320,TRIAE_CS42_1BL_TGACv1_031993_AA0123940,TRIAE_CS42_7BS_TGACv1_591781_AA1920850,TRIAE_CS42_5AL_TGACv1_375328_AA1219970,TRIAE_CS4…
GO:0032993	protein-DNA complex	cellular_component	9.38230661452527e-321	3.15340017006099e-317	337	1928	572	74606	TRIAE_CS42_3AS_TGACv1_211147_AA0686090,TRIAE_CS42_4DL_TGACv1_342899_AA1124970,TRIAE_CS42_U_TGACv1_644101_AA2137180,TRIAE_CS42_6BS_TGACv1_513585_AA1645280,TRIAE_CS42_6AS_TGACv1_485161_AA1538440,TRIAE_CS42_6AS_TGACv1_487490_AA1570920,TRIAE_CS42_U_TGACv1_640949_AA2080400,TRIAE_CS42_6DS_TGACv1_543230_AA1737240,TRIAE_CS42_6BS_TGACv1_513207_AA1634500,TRIAE_CS42_4DL_TGACv1_344965_AA1150720,TRIAE_CS42_6B…
GO:0000786	nucleosome	cellular_component	1.14188452066829e-319	2.5587000220481e-316	333	1928	555	74606	TRIAE_CS42_1BL_TGACv1_035752_AA0147030,TRIAE_CS42_1BS_TGACv1_049973_AA0165210,TRIAE_CS42_2BS_TGACv1_148218_AA0491430,TRIAE_CS42_1BL_TGACv1_030948_AA0104150,TRIAE_CS42_2BL_TGACv1_132371_AA0437200,TRIAE_CS42_7DS_TGACv1_621843_AA2027450,TRIAE_CS42_6DL_TGACv1_528287_AA1713070,TRIAE_CS42_3B_TGACv1_220915_AA0723570,TRIAE_CS42_6BS_TGACv1_515258_AA1668690,TRIAE_CS42_1AL_TGACv1_000710_AA0017560,TRIAE_CS42…
GO:0000785	chromatin	cellular_component	1.606e-306	2.6989e-303	333	1928	608	74606	TRIAE_CS42_6AS_TGACv1_487490_AA1570920,TRIAE_CS42_6BS_TGACv1_513585_AA1645280,TRIAE_CS42_6AS_TGACv1_485161_AA1538440,TRIAE_CS42_4DL_TGACv1_342899_AA1124970,TRIAE_CS42_3AS_TGACv1_211147_AA0686090,TRIAE_CS42_U_TGACv1_644101_AA2137180,TRIAE_CS42_U_TGACv1_640949_AA2080400,TRIAE_CS42_6DS_TGACv1_543230_AA1737240,TRIAE_CS42_7BS_TGACv1_592475_AA1938750,TRIAE_CS42_1AL_TGACv1_002871_AA0045760,TRIAE_CS42_1D…
GO:0044427	chromosomal part	cellular_component	5.4364e-290	7.3087e-287	343	1928	751	74606	TRIAE_CS42_6AS_TGACv1_486735_AA1564570,TRIAE_CS42_7BL_TGACv1_578253_AA1891980,TRIAE_CS42_1DL_TGACv1_061172_AA0187770,TRIAE_CS42_6DS_TGACv1_544725_AA1749230,TRIAE_CS42_1AL_TGACv1_000106_AA0003480,TRIAE_CS42_U_TGACv1_643270_AA2129970,TRIAE_CS42_3AL_TGACv1_196476_AA0660640,TRIAE_CS42_7BS_TGACv1_591871_AA1924080,TRIAE_CS42_1DL_TGACv1_062138_AA0209250,TRIAE_CS42_5BL_TGACv1_406348_AA1344440,TRIAE_CS42_…
GO:0046982	protein heterodimerization activity	molecular_function	1.8934e-275	2.1213e-272	321	1928	649	74606	TRIAE_CS42_5BL_TGACv1_412119_AA1367740,TRIAE_CS42_6DS_TGACv1_542879_AA1732020,TRIAE_CS42_4AS_TGACv1_307192_AA1018220,TRIAE_CS42_1BL_TGACv1_031614_AA0117220,TRIAE_CS42_1DL_TGACv1_061704_AA0201970,TRIAE_CS42_6BS_TGACv1_515249_AA1668600,TRIAE_CS42_3DL_TGACv1_249642_AA0853270,TRIAE_CS42_1BL_TGACv1_032427_AA0129750,TRIAE_CS42_7DS_TGACv1_622117_AA2033030,TRIAE_CS42_1BL_TGACv1_033077_AA0136820,TRIAE_CS4…
GO:0005694	chromosome	cellular_component	1.24e-266	1.1907e-263	343	1928	908	74606	TRIAE_CS42_7AL_TGACv1_556037_AA1753310,TRIAE_CS42_1DL_TGACv1_062308_AA0212250,TRIAE_CS42_2AL_TGACv1_101425_AA0327790,TRIAE_CS42_6AS_TGACv1_486735_AA1564600,TRIAE_CS42_6BS_TGACv1_513638_AA1646430,TRIAE_CS42_7AL_TGACv1_558570_AA1794420,TRIAE_CS42_5BL_TGACv1_405338_AA1325330,TRIAE_CS42_4DS_TGACv1_361266_AA1164530,TRIAE_CS42_2AL_TGACv1_095006_AA0305850,TRIAE_CS42_7DL_TGACv1_604128_AA1994180,TRIAE_CS4…
GO:0043234	protein complex	cellular_component	7.3561e-192	6.181e-189	462	1928	3161	74606	TRIAE_CS42_6AS_TGACv1_486616_AA1563230,TRIAE_CS42_6AS_TGACv1_486605_AA1563110,TRIAE_CS42_3AS_TGACv1_211393_AA0689720,TRIAE_CS42_3DS_TGACv1_272101_AA0914680,TRIAE_CS42_6AS_TGACv1_485977_AA1555130,TRIAE_CS42_6AS_TGACv1_485824_AA1552840,TRIAE_CS42_1BL_TGACv1_030353_AA0087850,TRIAE_CS42_6BS_TGACv1_514168_AA1656320,TRIAE_CS42_5AS_TGACv1_394157_AA1278420,TRIAE_CS42_4BL_TGACv1_320261_AA1032800,TRIAE_CS4…
GO:0043228	non-membrane-bounded organelle	cellular_component	6.3773e-168	4.2868e-165	411	1928	2572	74606	TRIAE_CS42_6AS_TGACv1_487966_AA1573820,TRIAE_CS42_6DS_TGACv1_543728_AA1743570,TRIAE_CS42_6BS_TGACv1_513774_AA1649320,TRIAE_CS42_6BS_TGACv1_515227_AA1668370,TRIAE_CS42_1DL_TGACv1_061203_AA0188640,TRIAE_CS42_3AS_TGACv1_213165_AA0705740,TRIAE_CS42_U_TGACv1_643192_AA2128740,TRIAE_CS42_2AL_TGACv1_097675_AA0324860,TRIAE_CS42_2BL_TGACv1_129333_AA0379170,TRIAE_CS42_U_TGACv1_643832_AA2135390,TRIAE_CS42_1D…
GO:0043232	intracellular non-membrane-bounded organelle	cellular_component	6.3773e-168	4.2868e-165	411	1928	2572	74606	TRIAE_CS42_6AS_TGACv1_485977_AA1555100,TRIAE_CS42_7BL_TGACv1_578288_AA1892490,TRIAE_CS42_1AL_TGACv1_000718_AA0017740,TRIAE_CS42_1AL_TGACv1_003580_AA0050490,TRIAE_CS42_6DS_TGACv1_543642_AA1742520,TRIAE_CS42_3B_TGACv1_226023_AA0813450,TRIAE_CS42_1AL_TGACv1_002871_AA0045770,TRIAE_CS42_6BS_TGACv1_513443_AA1641730,TRIAE_CS42_5BL_TGACv1_404742_AA1309800,TRIAE_CS42_5BL_TGACv1_404599_AA1305700,TRIAE_CS42…
GO:0044446	intracellular organelle part	cellular_component	1.458e-162	8.9095e-160	525	1928	4949	74606	TRIAE_CS42_7BS_TGACv1_591871_AA1924080,TRIAE_CS42_5BL_TGACv1_406348_AA1344440,TRIAE_CS42_7AS_TGACv1_571321_AA1846800,TRIAE_CS42_6AS_TGACv1_486735_AA1564570,TRIAE_CS42_6BS_TGACv1_513541_AA1644570,TRIAE_CS42_4DL_TGACv1_343777_AA1139610,TRIAE_CS42_7DS_TGACv1_622168_AA2034390,TRIAE_CS42_1AL_TGACv1_000106_AA0003480,TRIAE_CS42_U_TGACv1_642696_AA2121820,TRIAE_CS42_1DL_TGACv1_062835_AA0220660,TRIAE_CS42_…
GO:0044422	organelle part	cellular_component	1.9996e-162	1.1201e-159	525	1928	4953	74606	TRIAE_CS42_6DS_TGACv1_543728_AA1743580,TRIAE_CS42_1BS_TGACv1_050766_AA0175240,TRIAE_CS42_4BS_TGACv1_328196_AA1084480,TRIAE_CS42_U_TGACv1_641465_AA2095880,TRIAE_CS42_5DL_TGACv1_436184_AA1459030,TRIAE_CS42_3DL_TGACv1_250098_AA0862130,TRIAE_CS42_6BS_TGACv1_514827_AA1664770,TRIAE_CS42_1BL_TGACv1_031962_AA0123540,TRIAE_CS42_4BL_TGACv1_321458_AA1060720,TRIAE_CS42_7BS_TGACv1_592783_AA1944260,TRIAE_CS42_…
GO:0046983	protein dimerization activity	molecular_function	1.2718e-158	6.5762e-156	340	1928	1873	74606	TRIAE_CS42_1BL_TGACv1_035752_AA0147030,TRIAE_CS42_2BS_TGACv1_148218_AA0491430,TRIAE_CS42_1BS_TGACv1_049973_AA0165210,TRIAE_CS42_6DL_TGACv1_528287_AA1713070,TRIAE_CS42_7DS_TGACv1_621843_AA2027450,TRIAE_CS42_2BL_TGACv1_132371_AA0437200,TRIAE_CS42_7DL_TGACv1_603606_AA1986230,TRIAE_CS42_1BL_TGACv1_030948_AA0104150,TRIAE_CS42_6AS_TGACv1_486132_AA1557290,TRIAE_CS42_7DL_TGACv1_605061_AA2004290,TRIAE_CS4…
GO:0032991	macromolecular complex	cellular_component	2.4484e-157	1.1756e-154	509	1928	4428	74606	TRIAE_CS42_6DS_TGACv1_542798_AA1730580,TRIAE_CS42_U_TGACv1_644372_AA2139060,TRIAE_CS42_6AS_TGACv1_485264_AA1542040,TRIAE_CS42_4DL_TGACv1_345822_AA1154490,TRIAE_CS42_1DL_TGACv1_062690_AA0218210,TRIAE_CS42_6AS_TGACv1_485868_AA1553540,TRIAE_CS42_1BL_TGACv1_032734_AA0133480,TRIAE_CS42_6AS_TGACv1_485212_AA1540270,TRIAE_CS42_U_TGACv1_643303_AA2130480,TRIAE_CS42_3DL_TGACv1_249459_AA0849300,TRIAE_CS42_U_…
GO:0044424	intracellular part	cellular_component	1.2714e-106	5.6977e-104	843	1928	15347	74606	TRIAE_CS42_4DS_TGACv1_362233_AA1177980,TRIAE_CS42_6BL_TGACv1_500075_AA1598290,TRIAE_CS42_7AS_TGACv1_569800_AA1824260,TRIAE_CS42_7BL_TGACv1_577665_AA1880600,TRIAE_CS42_3AL_TGACv1_195757_AA0653580,TRIAE_CS42_7DL_TGACv1_602694_AA1965500,TRIAE_CS42_U_TGACv1_644372_AA2139060,TRIAE_CS42_1DL_TGACv1_061713_AA0202170,TRIAE_CS42_3DL_TGACv1_250658_AA0871780,TRIAE_CS42_6AS_TGACv1_485868_AA1553540,TRIAE_CS42_…
GO:0005622	intracellular	cellular_component	5.5507e-106	2.332e-103	865	1928	16003	74606	TRIAE_CS42_2DL_TGACv1_158543_AA0521520,TRIAE_CS42_6BS_TGACv1_513638_AA1646430,TRIAE_CS42_6AS_TGACv1_486735_AA1564600,TRIAE_CS42_1DL_TGACv1_062495_AA0215350,TRIAE_CS42_5BL_TGACv1_405338_AA1325330,TRIAE_CS42_4BL_TGACv1_322527_AA1071800,TRIAE_CS42_7AL_TGACv1_558570_AA1794420,TRIAE_CS42_2BL_TGACv1_129785_AA0395850,TRIAE_CS42_7DL_TGACv1_602895_AA1971290,TRIAE_CS42_5AL_TGACv1_375755_AA1226710,TRIAE_CS4…
DL_TGACv1_605061_AA2004290,TRIAE_CS42_1AL_TGACv1_000710_AA0017560,TRIAE_CS42_3B_TGACv1_222044_AA0755660,TRIAE_CS42_4AS_TGACv1_306977_AA1015630,TRIAE_CS42_U_TGACv1_641354_AA2092790,TRIAE_CS42_4BL_TGACv1_321871_AA1066490,TRIAE_CS42_3AL_TGACv1_194328_AA0631110,TRIAE_CS42_5DL_TGACv1_433402_AA1412060,TRIAE_CS42_7DS_TGACv1_621843_AA2027450,TRIAE_CS42_6DL_TGACv1_528287_AA1713070,TRIAE_CS42_3B_TGACv1_222…
GO:0005623	cell	cellular_component	6.4562e-99	2.5528e-96	897	1928	17412	74606	TRIAE_CS42_3AS_TGACv1_211501_AA0690860,TRIAE_CS42_U_TGACv1_644112_AA2137260,TRIAE_CS42_1AL_TGACv1_001320_AA0028620,TRIAE_CS42_1BS_TGACv1_049965_AA0164830,TRIAE_CS42_1BS_TGACv1_049375_AA0151120,TRIAE_CS42_4DL_TGACv1_342471_AA1114460,TRIAE_CS42_3AL_TGACv1_193642_AA0616060,TRIAE_CS42_5BL_TGACv1_404454_AA1300370,TRIAE_CS42_U_TGACv1_643126_AA2127630,TRIAE_CS42_U_TGACv1_642463_AA2118090,TRIAE_CS42_7BS_…
GACv1_642157_AA2112400,TRIAE_CS42_3AL_TGACv1_196806_AA0663050,TRIAE_CS42_2AL_TGACv1_094650_AA0301090,TRIAE_CS42_2BL_TGACv1_129397_AA0381780,TRIAE_CS42_5BL_TGACv1_406196_AA1342070,TRIAE_CS42_5BL_TGACv1_404880_AA1313960,TRIAE_CS42_1BL_TGACv1_031669_AA0118350,TRIAE_CS42_3DL_TGACv1_250627_AA0871260,TRIAE_CS42_6BS_TGACv1_514209_AA1657000,TRIAE_CS42_4DL_TGACv1_343165_AA1130900,TRIAE_CS42_7BS_TGACv1_592…
GO:0044464	cell part	cellular_component	1.0201e-98	3.8093e-96	884	1928	17082	74606	TRIAE_CS42_6DL_TGACv1_526389_AA1681790,TRIAE_CS42_7BL_TGACv1_577540_AA1878250,TRIAE_CS42_1BL_TGACv1_032758_AA0133900,TRIAE_CS42_3AL_TGACv1_194057_AA0625630,TRIAE_CS42_1BL_TGACv1_030582_AA0094760,TRIAE_CS42_1BL_TGACv1_031438_AA0114030,TRIAE_CS42_5AL_TGACv1_376168_AA1233160,TRIAE_CS42_1DL_TGACv1_061401_AA0194240,TRIAE_CS42_2BL_TGACv1_131489_AA0428400,TRIAE_CS42_4AL_TGACv1_290500_AA0986100,TRIAE_CS4…
_TGACv1_625332_AA2064910,TRIAE_CS42_7BS_TGACv1_592325_AA1935670,TRIAE_CS42_7BS_TGACv1_593884_AA1954980,TRIAE_CS42_1AL_TGACv1_001331_AA0028860,TRIAE_CS42_6BL_TGACv1_499410_AA1581870,TRIAE_CS42_6AS_TGACv1_485618_AA1548930,TRIAE_CS42_6BL_TGACv1_500578_AA1606620,TRIAE_CS42_4DL_TGACv1_342367_AA1111630,TRIAE_CS42_6DS_TGACv1_543504_AA1740860,TRIAE_CS42_1BL_TGACv1_030287_AA0085450,TRIAE_CS42_2AS_TGACv1_1…
GO:0043229	intracellular organelle	cellular_component	8.7053e-98	3.0799e-95	757	1928	13308	74606	TRIAE_CS42_6BL_TGACv1_499837_AA1592870,TRIAE_CS42_2DL_TGACv1_157896_AA0500890,TRIAE_CS42_7BL_TGACv1_577398_AA1874420,TRIAE_CS42_3DS_TGACv1_273777_AA0933410,TRIAE_CS42_4BL_TGACv1_321702_AA1064290,TRIAE_CS42_6AS_TGACv1_485824_AA1552830,TRIAE_CS42_6AS_TGACv1_486132_AA1557300,TRIAE_CS42_1BL_TGACv1_031712_AA0119450,TRIAE_CS42_7AS_TGACv1_570271_AA1833160,TRIAE_CS42_U_TGACv1_640751_AA2072500,TRIAE_CS42_…
GO:0043226	organelle	cellular_component	1.1009e-97	3.7e-95	757	1928	13314	74606	TRIAE_CS42_7DL_TGACv1_605433_AA2006540,TRIAE_CS42_1BL_TGACv1_031047_AA0106660,TRIAE_CS42_4AS_TGACv1_306214_AA1004350,TRIAE_CS42_5BS_TGACv1_423395_AA1375790,TRIAE_CS42_4BS_TGACv1_328213_AA1084720,TRIAE_CS42_6AS_TGACv1_485161_AA1538470,TRIAE_CS42_7BL_TGACv1_577483_AA1876500,TRIAE_CS42_3B_TGACv1_221292_AA0736430,TRIAE_CS42_6AS_TGACv1_486796_AA1565110,TRIAE_CS42_4AL_TGACv1_292093_AA0997710,TRIAE_CS42…
GO:0043231	intracellular membrane-bounded organelle	cellular_component	3.6683e-96	1.1742e-93	697	1928	11977	74606	TRIAE_CS42_2DL_TGACv1_159084_AA0532060,TRIAE_CS42_3AL_TGACv1_197715_AA0667040,TRIAE_CS42_1BL_TGACv1_032248_AA0127430,TRIAE_CS42_1BL_TGACv1_031136_AA0108420,TRIAE_CS42_6BS_TGACv1_515110_AA1667400,TRIAE_CS42_5DL_TGACv1_433661_AA1418670,TRIAE_CS42_3DS_TGACv1_271872_AA0909840,TRIAE_CS42_6DL_TGACv1_527835_AA1709090,TRIAE_CS42_5AL_TGACv1_376137_AA1232600,TRIAE_CS42_6DS_TGACv1_543042_AA1734510,TRIAE_CS4…
GO:0043227	membrane-bounded organelle	cellular_component	4.4044e-96	1.3458e-93	697	1928	11982	74606	TRIAE_CS42_1DL_TGACv1_061203_AA0188640,TRIAE_CS42_U_TGACv1_641240_AA2089370,TRIAE_CS42_6BS_TGACv1_515227_AA1668370,TRIAE_CS42_U_TGACv1_643385_AA2131440,TRIAE_CS42_7AL_TGACv1_558175_AA1790890,TRIAE_CS42_7AS_TGACv1_570466_AA1836110,TRIAE_CS42_4AL_TGACv1_288170_AA0939380,TRIAE_CS42_U_TGACv1_643832_AA2135390,TRIAE_CS42_2BL_TGACv1_131506_AA0428640,TRIAE_CS42_1BL_TGACv1_032815_AA0134370,TRIAE_CS42_6DS_…
GO:0006334	nucleosome assembly	biological_process	1.203e-81	3.5159e-79	96	1928	195	74606	TRIAE_CS42_6BS_TGACv1_513293_AA1637680,TRIAE_CS42_U_TGACv1_644773_AA2141580,TRIAE_CS42_5BL_TGACv1_404429_AA1299600,TRIAE_CS42_5DL_TGACv1_433377_AA1411470,TRIAE_CS42_5AL_TGACv1_376758_AA1240670,TRIAE_CS42_5DL_TGACv1_433265_AA1407530,TRIAE_CS42_2BL_TGACv1_131580_AA0429350,TRIAE_CS42_1BL_TGACv1_034569_AA0144890,TRIAE_CS42_6BS_TGACv1_513828_AA1650380,TRIAE_CS42_1DS_TGACv1_080918_AA0255560,TRIAE_CS42_…
GO:0006323	DNA packaging	biological_process	1.4241e-81	3.9887e-79	99	1928	219	74606	TRIAE_CS42_6DL_TGACv1_528182_AA1712240,TRIAE_CS42_1BL_TGACv1_030948_AA0104150,TRIAE_CS42_1DL_TGACv1_062308_AA0212260,TRIAE_CS42_6AS_TGACv1_487490_AA1570920,TRIAE_CS42_1BS_TGACv1_049375_AA0151120,TRIAE_CS42_6BS_TGACv1_513202_AA1634200,TRIAE_CS42_U_TGACv1_644101_AA2137180,TRIAE_CS42_6AS_TGACv1_485977_AA1555100,TRIAE_CS42_2DL_TGACv1_158996_AA0530240,TRIAE_CS42_1AL_TGACv1_001027_AA0023720,TRIAE_CS42_…
GO:0031497	chromatin assembly	biological_process	1.8878e-81	5.0758e-79	96	1928	196	74606	TRIAE_CS42_2AL_TGACv1_101425_AA0327790,TRIAE_CS42_1DL_TGACv1_061704_AA0201970,TRIAE_CS42_4BL_TGACv1_321170_AA1056520,TRIAE_CS42_1BL_TGACv1_031614_AA0117220,TRIAE_CS42_1DL_TGACv1_061177_AA0187890,TRIAE_CS42_U_TGACv1_643349_AA2131010,TRIAE_CS42_6AS_TGACv1_486735_AA1564600,TRIAE_CS42_6BS_TGACv1_513638_AA1646430,TRIAE_CS42_1DL_TGACv1_064263_AA0233610,TRIAE_CS42_2BL_TGACv1_131483_AA0428330,TRIAE_CS42_…
GO:0034728	nucleosome organization	biological_process	4.9426e-81	1.2778e-78	96	1928	198	74606	TRIAE_CS42_6DL_TGACv1_528182_AA1712240,TRIAE_CS42_1DL_TGACv1_062308_AA0212260,TRIAE_CS42_1BL_TGACv1_030948_AA0104150,TRIAE_CS42_6AS_TGACv1_487490_AA1570920,TRIAE_CS42_1BS_TGACv1_049375_AA0151120,TRIAE_CS42_6BS_TGACv1_513202_AA1634200,TRIAE_CS42_U_TGACv1_644101_AA2137180,TRIAE_CS42_6AS_TGACv1_485977_AA1555100,TRIAE_CS42_2DL_TGACv1_158996_AA0530240,TRIAE_CS42_1AL_TGACv1_001027_AA0023720,TRIAE_CS42_…
GO:0003677	DNA binding	molecular_function	1.0208e-79	2.5413e-77	430	1928	5886	74606	TRIAE_CS42_6DS_TGACv1_543642_AA1742510,TRIAE_CS42_7BL_TGACv1_578270_AA1892170,TRIAE_CS42_5BL_TGACv1_407645_AA1358580,TRIAE_CS42_7DS_TGACv1_624767_AA2063200,TRIAE_CS42_6DS_TGACv1_544682_AA1749160,TRIAE_CS42_5DL_TGACv1_434543_AA1437830,TRIAE_CS42_2AL_TGACv1_097031_AA0322690,TRIAE_CS42_2AS_TGACv1_112391_AA0337130,TRIAE_CS42_6BS_TGACv1_513478_AA1642840,TRIAE_CS42_1BL_TGACv1_032655_AA0132440,TRIAE_CS4…
GO:0006333	chromatin assembly or disassembly	biological_process	1.2349e-79	2.9646e-77	96	1928	204	74606	TRIAE_CS42_5BL_TGACv1_407099_AA1353300,TRIAE_CS42_1AL_TGACv1_000306_AA0008450,TRIAE_CS42_6AS_TGACv1_486655_AA1563770,TRIAE_CS42_1BL_TGACv1_032815_AA0134370,TRIAE_CS42_6AS_TGACv1_485161_AA1538470,TRIAE_CS42_2DL_TGACv1_158517_AA0520630,TRIAE_CS42_5AL_TGACv1_375261_AA1218680,TRIAE_CS42_5AL_TGACv1_375137_AA1216720,TRIAE_CS42_2DL_TGACv1_159499_AA0539070,TRIAE_CS42_2BL_TGACv1_129425_AA0383190,TRIAE_CS4…
GO:0005634	nucleus	cellular_component	6.0982e-76	1.4135e-73	468	1928	7079	74606	TRIAE_CS42_1DL_TGACv1_061631_AA0200580,TRIAE_CS42_7BS_TGACv1_593720_AA1954010,TRIAE_CS42_4AS_TGACv1_307117_AA1017180,TRIAE_CS42_5DL_TGACv1_432937_AA1395210,TRIAE_CS42_6BS_TGACv1_513178_AA1633060,TRIAE_CS42_1DL_TGACv1_061579_AA0199110,TRIAE_CS42_7DS_TGACv1_624537_AA2061870,TRIAE_CS42_1DS_TGACv1_080666_AA0251960,TRIAE_CS42_7DL_TGACv1_604698_AA2000810,TRIAE_CS42_5DL_TGACv1_435878_AA1455830,TRIAE_CS4…
GO:0065004	protein-DNA complex assembly	biological_process	1.322e-70	2.9623e-68	96	1928	257	74606	TRIAE_CS42_3DL_TGACv1_250098_AA0862130,TRIAE_CS42_U_TGACv1_643670_AA2134050,TRIAE_CS42_1AL_TGACv1_001233_AA0027610,TRIAE_CS42_5AL_TGACv1_375137_AA1216720,TRIAE_CS42_2BL_TGACv1_129425_AA0383190,TRIAE_CS42_2DL_TGACv1_159499_AA0539070,TRIAE_CS42_1BL_TGACv1_032815_AA0134370,TRIAE_CS42_6AS_TGACv1_485161_AA1538470,TRIAE_CS42_2DL_TGACv1_158517_AA0520630,TRIAE_CS42_5AL_TGACv1_375261_AA1218680,TRIAE_CS42_…
GO:0071824	protein-DNA complex subunit organization	biological_process	3.5278e-70	7.6496e-68	96	1928	260	74606	TRIAE_CS42_1DL_TGACv1_064263_AA0233610,TRIAE_CS42_2BL_TGACv1_131483_AA0428330,TRIAE_CS42_6AS_TGACv1_486735_AA1564600,TRIAE_CS42_6BS_TGACv1_513638_AA1646430,TRIAE_CS42_U_TGACv1_643349_AA2131010,TRIAE_CS42_1DL_TGACv1_061177_AA0187890,TRIAE_CS42_1BL_TGACv1_031614_AA0117220,TRIAE_CS42_1DL_TGACv1_061704_AA0201970,TRIAE_CS42_4BL_TGACv1_321170_AA1056520,TRIAE_CS42_2AL_TGACv1_101425_AA0327790,TRIAE_CS42_…
GO:0071103	DNA conformation change	biological_process	2.032e-63	4.2685e-61	105	1928	451	74606	TRIAE_CS42_1AL_TGACv1_003580_AA0050490,TRIAE_CS42_2BL_TGACv1_129685_AA0392600,TRIAE_CS42_1AL_TGACv1_001945_AA0037070,TRIAE_CS42_1BL_TGACv1_032167_AA0126220,TRIAE_CS42_5DL_TGACv1_433876_AA1424220,TRIAE_CS42_2DL_TGACv1_158996_AA0530240,TRIAE_CS42_6AS_TGACv1_485977_AA1555100,TRIAE_CS42_1AL_TGACv1_001027_AA0023720,TRIAE_CS42_6BS_TGACv1_513207_AA1634500,TRIAE_CS42_6BS_TGACv1_513443_AA1641730,TRIAE_CS4…
GO:0006461	protein complex assembly	biological_process	1.0877e-54	2.2156e-52	108	1928	539	74606	TRIAE_CS42_6BS_TGACv1_513922_AA1652200,TRIAE_CS42_U_TGACv1_644372_AA2139060,TRIAE_CS42_2BL_TGACv1_129824_AA0397350,TRIAE_CS42_4BS_TGACv1_328452_AA1088030,TRIAE_CS42_U_TGACv1_644834_AA2141840,TRIAE_CS42_3DL_TGACv1_250339_AA0866430,TRIAE_CS42_U_TGACv1_641129_AA2086300,TRIAE_CS42_1BL_TGACv1_032734_AA0133480,TRIAE_CS42_U_TGACv1_643303_AA2130480,TRIAE_CS42_6AS_TGACv1_485693_AA1550180,TRIAE_CS42_3DL_TG…
GO:0070271	protein complex biogenesis	biological_process	5.8888e-54	1.1642e-51	108	1928	548	74606	TRIAE_CS42_6DL_TGACv1_528182_AA1712240,TRIAE_CS42_1AS_TGACv1_019520_AA0067630,TRIAE_CS42_1BL_TGACv1_030948_AA0104150,TRIAE_CS42_1DL_TGACv1_062308_AA0212260,TRIAE_CS42_1BS_TGACv1_049375_AA0151120,TRIAE_CS42_4AL_TGACv1_288747_AA0957130,TRIAE_CS42_6AS_TGACv1_487490_AA1570920,TRIAE_CS42_U_TGACv1_644101_AA2137180,TRIAE_CS42_6BS_TGACv1_513202_AA1634200,TRIAE_CS42_1AL_TGACv1_001027_AA0023720,TRIAE_CS42_…
GO:0034622	cellular macromolecular complex assembly	biological_process	4.6511e-53	8.9327e-51	113	1928	619	74606	TRIAE_CS42_2DL_TGACv1_159654_AA0541050,TRIAE_CS42_U_TGACv1_644773_AA2141580,TRIAE_CS42_6BS_TGACv1_513293_AA1637680,TRIAE_CS42_4AL_TGACv1_289336_AA0969290,TRIAE_CS42_6BS_TGACv1_513828_AA1650380,TRIAE_CS42_1BL_TGACv1_034569_AA0144890,TRIAE_CS42_5AL_TGACv1_376758_AA1240670,TRIAE_CS42_2BL_TGACv1_131580_AA0429350,TRIAE_CS42_5DL_TGACv1_433265_AA1407530,TRIAE_CS42_5DL_TGACv1_433377_AA1411470,TRIAE_CS42_…
GO:0071822	protein complex subunit organization	biological_process	9.793e-53	1.8286e-50	118	1928	710	74606	TRIAE_CS42_6BS_TGACv1_513207_AA1634500,TRIAE_CS42_6BS_TGACv1_513443_AA1641730,TRIAE_CS42_6BS_TGACv1_515258_AA1668690,TRIAE_CS42_3AL_TGACv1_194328_AA0631110,TRIAE_CS42_1DL_TGACv1_064811_AA0235770,TRIAE_CS42_1BL_TGACv1_032167_AA0126220,TRIAE_CS42_5DL_TGACv1_433876_AA1424220,TRIAE_CS42_1BL_TGACv1_030590_AA0094940,TRIAE_CS42_6AS_TGACv1_485977_AA1555100,TRIAE_CS42_2DL_TGACv1_158996_AA0530240,TRIAE_CS4…
GO:0006325	chromatin organization	biological_process	3.9071e-50	7.0982e-48	103	1928	604	74606	TRIAE_CS42_5AL_TGACv1_375261_AA1218680,TRIAE_CS42_2DL_TGACv1_158517_AA0520630,TRIAE_CS42_6AS_TGACv1_485161_AA1538470,TRIAE_CS42_1BL_TGACv1_032815_AA0134370,TRIAE_CS42_6AS_TGACv1_486655_AA1563770,TRIAE_CS42_1AL_TGACv1_000306_AA0008450,TRIAE_CS42_5BL_TGACv1_407099_AA1353300,TRIAE_CS42_1AL_TGACv1_001233_AA0027610,TRIAE_CS42_U_TGACv1_643670_AA2134050,TRIAE_CS42_3DL_TGACv1_250098_AA0862130,TRIAE_CS42_…
GO:0044281	small molecule metabolic process	biological_process	1.3145e-48	2.3252e-46	231	1928	3211	74606	TRIAE_CS42_5DL_TGACv1_433402_AA1412060,TRIAE_CS42_5BL_TGACv1_406345_AA1344380,TRIAE_CS42_1DL_TGACv1_062210_AA0210500,TRIAE_CS42_4BL_TGACv1_321135_AA1056010,TRIAE_CS42_1BL_TGACv1_030585_AA0094830,TRIAE_CS42_4BS_TGACv1_328490_AA1088680,TRIAE_CS42_7BS_TGACv1_592594_AA1941060,TRIAE_CS42_5AS_TGACv1_393328_AA1271350,TRIAE_CS42_2DS_TGACv1_177309_AA0573080,TRIAE_CS42_4AL_TGACv1_289200_AA0967200,TRIAE_CS4…
GO:0065003	macromolecular complex assembly	biological_process	2.4162e-48	4.1645e-46	114	1928	720	74606	TRIAE_CS42_U_TGACv1_643192_AA2128740,TRIAE_CS42_6BS_TGACv1_514209_AA1657000,TRIAE_CS42_1DL_TGACv1_064141_AA0232850,TRIAE_CS42_U_TGACv1_644700_AA2141220,TRIAE_CS42_1BL_TGACv1_031669_AA0118350,TRIAE_CS42_5BL_TGACv1_404880_AA1313960,TRIAE_CS42_5BL_TGACv1_406196_AA1342070,TRIAE_CS42_1BL_TGACv1_030287_AA0085480,TRIAE_CS42_2AL_TGACv1_095006_AA0305840,TRIAE_CS42_3B_TGACv1_224221_AA0794070,TRIAE_CS42_6BS…
GO:0051276	chromosome organization	biological_process	9.4555e-42	1.589e-39	114	1928	983	74606	TRIAE_CS42_6AS_TGACv1_486735_AA1564600,TRIAE_CS42_5BL_TGACv1_404851_AA1312860,TRIAE_CS42_6BS_TGACv1_513638_AA1646430,TRIAE_CS42_2BL_TGACv1_131483_AA0428330,TRIAE_CS42_1DL_TGACv1_064263_AA0233610,TRIAE_CS42_U_TGACv1_643349_AA2131010,TRIAE_CS42_1DL_TGACv1_061177_AA0187890,TRIAE_CS42_2AL_TGACv1_101425_AA0327790,TRIAE_CS42_1DL_TGACv1_061704_AA0201970,TRIAE_CS42_1BL_TGACv1_031614_AA0117220,TRIAE_CS42_…
GO:0006996	organelle organization	biological_process	1.4973e-41	2.4548e-39	163	1928	1959	74606	TRIAE_CS42_3B_TGACv1_220835_AA0720860,TRIAE_CS42_2AL_TGACv1_101425_AA0327790,TRIAE_CS42_6BS_TGACv1_513638_AA1646430,TRIAE_CS42_6AS_TGACv1_486735_AA1564600,TRIAE_CS42_2AL_TGACv1_095006_AA0305850,TRIAE_CS42_4BL_TGACv1_321242_AA1057770,TRIAE_CS42_4AS_TGACv1_307117_AA1017180,TRIAE_CS42_4DS_TGACv1_362355_AA1179020,TRIAE_CS42_4BL_TGACv1_320261_AA1032800,TRIAE_CS42_4BS_TGACv1_329163_AA1098380,TRIAE_CS42…
GO:0022607	cellular component assembly	biological_process	4.3018e-41	6.8849e-39	117	1928	925	74606	TRIAE_CS42_1BS_TGACv1_049375_AA0151120,TRIAE_CS42_4AL_TGACv1_288747_AA0957130,TRIAE_CS42_6AS_TGACv1_487490_AA1570920,TRIAE_CS42_U_TGACv1_644101_AA2137180,TRIAE_CS42_6BS_TGACv1_513202_AA1634200,TRIAE_CS42_1AS_TGACv1_019520_AA0067630,TRIAE_CS42_6DL_TGACv1_528182_AA1712240,TRIAE_CS42_1BL_TGACv1_030948_AA0104150,TRIAE_CS42_1DL_TGACv1_062308_AA0212260,TRIAE_CS42_U_TGACv1_642463_AA2118090,TRIAE_CS42_2B…
GO:0003676	nucleic acid binding	molecular_function	6.5562e-41	1.0249e-38	506	1928	10697	74606	TRIAE_CS42_2AL_TGACv1_101425_AA0327790,TRIAE_CS42_4AL_TGACv1_291021_AA0991430,TRIAE_CS42_1AL_TGACv1_001526_AA0031720,TRIAE_CS42_7DL_TGACv1_604491_AA1998610,TRIAE_CS42_1DL_TGACv1_062308_AA0212250,TRIAE_CS42_2DL_TGACv1_159004_AA0530430,TRIAE_CS42_2DS_TGACv1_178414_AA0595250,TRIAE_CS42_7AL_TGACv1_556037_AA1753310,TRIAE_CS42_5BL_TGACv1_405915_AA1337580,TRIAE_CS42_7AS_TGACv1_570040_AA1829250,TRIAE_CS4…
GO:0043933	macromolecular complex subunit organization	biological_process	8.6922e-39	1.3279e-36	131	1928	1293	74606	TRIAE_CS42_5AL_TGACv1_375137_AA1216720,TRIAE_CS42_4AS_TGACv1_307317_AA1019370,TRIAE_CS42_2BL_TGACv1_129349_AA0379700,TRIAE_CS42_3DL_TGACv1_250098_AA0862130,TRIAE_CS42_1AL_TGACv1_000306_AA0008450,TRIAE_CS42_5BL_TGACv1_407099_AA1353300,TRIAE_CS42_2DL_TGACv1_158517_AA0520630,TRIAE_CS42_1BL_TGACv1_032815_AA0134370,TRIAE_CS42_U_TGACv1_643192_AA2128740,TRIAE_CS42_1DL_TGACv1_064141_AA0232850,TRIAE_CS42_…
GO:0006082	organic acid metabolic process	biological_process	4.001e-37	5.9766e-35	153	1928	1987	74606	TRIAE_CS42_2DL_TGACv1_159916_AA0544360,TRIAE_CS42_2DS_TGACv1_178228_AA0593010,TRIAE_CS42_U_TGACv1_654540_AA2150720,TRIAE_CS42_2AL_TGACv1_093541_AA0282230,TRIAE_CS42_1BL_TGACv1_030605_AA0095500,TRIAE_CS42_5DS_TGACv1_457334_AA1485300,TRIAE_CS42_3B_TGACv1_225182_AA0805900,TRIAE_CS42_3DL_TGACv1_250475_AA0868810,TRIAE_CS42_4DL_TGACv1_343257_AA1132320,TRIAE_CS42_6BS_TGACv1_513935_AA1652480,TRIAE_CS42_3…
GO:0043436	oxoacid metabolic process	biological_process	2.622e-36	3.8315e-34	151	1928	1978	74606	TRIAE_CS42_1DL_TGACv1_063603_AA0229020,TRIAE_CS42_7DS_TGACv1_622272_AA2036850,TRIAE_CS42_6DS_TGACv1_544326_AA1747750,TRIAE_CS42_6AL_TGACv1_471819_AA1514670,TRIAE_CS42_U_TGACv1_644014_AA2136450,TRIAE_CS42_1BL_TGACv1_030654_AA0097000,TRIAE_CS42_6BS_TGACv1_513449_AA1641870,TRIAE_CS42_1AS_TGACv1_021532_AA0081820,TRIAE_CS42_2AL_TGACv1_094627_AA0300840,TRIAE_CS42_7AS_TGACv1_572202_AA1851680,TRIAE_CS42_…
GO:0019752	carboxylic acid metabolic process	biological_process	1.1906e-34	1.7027e-32	147	1928	1952	74606	TRIAE_CS42_1AL_TGACv1_000254_AA0007380,TRIAE_CS42_2BL_TGACv1_129465_AA0384880,TRIAE_CS42_4AS_TGACv1_307275_AA1019080,TRIAE_CS42_1AL_TGACv1_002631_AA0043990,TRIAE_CS42_2DL_TGACv1_158146_AA0510470,TRIAE_CS42_2BL_TGACv1_131119_AA0422830,TRIAE_CS42_3AL_TGACv1_196429_AA0660330,TRIAE_CS42_2AL_TGACv1_094486_AA0298610,TRIAE_CS42_7BS_TGACv1_591992_AA1927520,TRIAE_CS42_2AL_TGACv1_094054_AA0291710,TRIAE_CS4…
GO:0097159	organic cyclic compound binding	molecular_function	1.4764e-33	2.0253e-31	822	1928	24199	74606	TRIAE_CS42_4BS_TGACv1_329796_AA1104090,TRIAE_CS42_5DL_TGACv1_434030_AA1427600,TRIAE_CS42_3B_TGACv1_221696_AA0747690,TRIAE_CS42_1BL_TGACv1_032815_AA0134370,TRIAE_CS42_1DL_TGACv1_061203_AA0188670,TRIAE_CS42_7DS_TGACv1_621446_AA2015840,TRIAE_CS42_1AL_TGACv1_000383_AA0010660,TRIAE_CS42_4DL_TGACv1_344347_AA1146290,TRIAE_CS42_7AL_TGACv1_558158_AA1790770,TRIAE_CS42_1AS_TGACv1_019041_AA0058780,TRIAE_CS42…
GO:1901363	heterocyclic compound binding	molecular_function	1.4764e-33	2.0253e-31	822	1928	24199	74606	TRIAE_CS42_1AS_TGACv1_019287_AA0064380,TRIAE_CS42_U_TGACv1_640700_AA2069590,TRIAE_CS42_3B_TGACv1_223754_AA0786670,TRIAE_CS42_5BS_TGACv1_423557_AA1379410,TRIAE_CS42_U_TGACv1_712376_AA2166870,TRIAE_CS42_2BL_TGACv1_129772_AA0395390,TRIAE_CS42_5DL_TGACv1_434221_AA1432010,TRIAE_CS42_7AS_TGACv1_570780_AA1840810,TRIAE_CS42_6AS_TGACv1_486709_AA1564310,TRIAE_CS42_3DS_TGACv1_272258_AA0917870,TRIAE_CS42_1DL…
GO:0044711	single-organism biosynthetic process	biological_process	8.821e-31	1.1859e-28	166	1928	2584	74606	TRIAE_CS42_5BL_TGACv1_405295_AA1324290,TRIAE_CS42_U_TGACv1_643776_AA2134960,TRIAE_CS42_5AL_TGACv1_375241_AA1218400,TRIAE_CS42_5DL_TGACv1_433024_AA1398620,TRIAE_CS42_1DL_TGACv1_062182_AA0210070,TRIAE_CS42_6AL_TGACv1_471945_AA1516140,TRIAE_CS42_5BL_TGACv1_404321_AA1295470,TRIAE_CS42_4AL_TGACv1_288528_AA0951160,TRIAE_CS42_2DS_TGACv1_177565_AA0580190,TRIAE_CS42_5AL_TGACv1_375327_AA1219960,TRIAE_CS42_…
GO:0044699	single-organism process	biological_process	1.1124e-30	1.4662e-28	708	1928	19601	74606	TRIAE_CS42_1BS_TGACv1_049652_AA0158940,TRIAE_CS42_3B_TGACv1_224606_AA0798680,TRIAE_CS42_U_TGACv1_642531_AA2119080,TRIAE_CS42_7DS_TGACv1_624347_AA2060690,TRIAE_CS42_6DL_TGACv1_526657_AA1689120,TRIAE_CS42_6BS_TGACv1_514091_AA1654910,TRIAE_CS42_2BS_TGACv1_146275_AA0461220,TRIAE_CS42_4BL_TGACv1_320400_AA1037850,TRIAE_CS42_2AL_TGACv1_093044_AA0270150,TRIAE_CS42_2AL_TGACv1_093051_AA0270470,TRIAE_CS42_2…
GO:0044085	cellular component biogenesis	biological_process	1.5668e-30	2.0253e-28	128	1928	1462	74606	TRIAE_CS42_5BL_TGACv1_406348_AA1344440,TRIAE_CS42_1DL_TGACv1_062138_AA0209250,TRIAE_CS42_1BL_TGACv1_031533_AA0115710,TRIAE_CS42_4DS_TGACv1_362497_AA1180110,TRIAE_CS42_3DS_TGACv1_271667_AA0905120,TRIAE_CS42_3AL_TGACv1_196476_AA0660640,TRIAE_CS42_U_TGACv1_643270_AA2129970,TRIAE_CS42_1DL_TGACv1_061172_AA0187770,TRIAE_CS42_5DS_TGACv1_457254_AA1484340,TRIAE_CS42_6AS_TGACv1_486735_AA1564570,TRIAE_CS42_…
GO:0044763	single-organism cellular process	biological_process	1.6205e-29	2.0553e-27	513	1928	13268	74606	TRIAE_CS42_2DL_TGACv1_159916_AA0544360,TRIAE_CS42_3AL_TGACv1_193952_AA0623370,TRIAE_CS42_U_TGACv1_654540_AA2150720,TRIAE_CS42_4BS_TGACv1_328586_AA1090550,TRIAE_CS42_1BL_TGACv1_030605_AA0095500,TRIAE_CS42_4DL_TGACv1_342972_AA1126540,TRIAE_CS42_3AS_TGACv1_210890_AA0680890,TRIAE_CS42_7BL_TGACv1_580117_AA1912080,TRIAE_CS42_1BL_TGACv1_031944_AA0123110,TRIAE_CS42_5DL_TGACv1_432946_AA1395680,TRIAE_CS42_…
GO:0005575	cellular_component	cellular_component	6.2822e-27	7.8202e-25	1185	1928	35848	74606	TRIAE_CS42_5DL_TGACv1_435353_AA1449430,TRIAE_CS42_1BL_TGACv1_031403_AA0113240,TRIAE_CS42_6AS_TGACv1_487544_AA1571370,TRIAE_CS42_2DL_TGACv1_159200_AA0534260,TRIAE_CS42_5AL_TGACv1_374249_AA1195140,TRIAE_CS42_5BL_TGACv1_404443_AA1299940,TRIAE_CS42_7DL_TGACv1_604016_AA1992390,TRIAE_CS42_3B_TGACv1_222485_AA0765690,TRIAE_CS42_2DL_TGACv1_159654_AA0541050,TRIAE_CS42_3B_TGACv1_227262_AA0822510,TRIAE_CS42_…
Cv1_211332_AA0688720,TRIAE_CS42_6AS_TGACv1_486115_AA1557000,TRIAE_CS42_5BL_TGACv1_404742_AA1309800,TRIAE_CS42_5BL_TGACv1_404599_AA1305700,TRIAE_CS42_7BL_TGACv1_578288_AA1892490,TRIAE_CS42_6AS_TGACv1_485977_AA1555100,TRIAE_CS42_1DL_TGACv1_061593_AA0199390,TRIAE_CS42_4BS_TGACv1_329163_AA1098380,TRIAE_CS42_4AS_TGACv1_307117_AA1017180,TRIAE_CS42_6BS_TGACv1_513178_AA1633060,TRIAE_CS42_4DS_TGACv1_36235…
GO:0005737	cytoplasm	cellular_component	5.3102e-25	6.49e-23	373	1928	8111	74606	TRIAE_CS42_1BL_TGACv1_031136_AA0108420,TRIAE_CS42_3AL_TGACv1_197715_AA0667040,TRIAE_CS42_2DL_TGACv1_159084_AA0532060,TRIAE_CS42_4DL_TGACv1_342433_AA1113510,TRIAE_CS42_1BS_TGACv1_049680_AA0159500,TRIAE_CS42_4DL_TGACv1_342742_AA1120750,TRIAE_CS42_4AL_TGACv1_289336_AA0969290,TRIAE_CS42_3DS_TGACv1_271872_AA0909840,TRIAE_CS42_5AS_TGACv1_394157_AA1278470,TRIAE_CS42_5DL_TGACv1_433661_AA1418670,TRIAE_CS4…
GO:0044283	small molecule biosynthetic process	biological_process	8.4813e-23	1.0181e-20	89	1928	1102	74606	TRIAE_CS42_4AL_TGACv1_290117_AA0981910,TRIAE_CS42_1AL_TGACv1_000254_AA0007370,TRIAE_CS42_2AL_TGACv1_093558_AA0282560,TRIAE_CS42_1BL_TGACv1_031520_AA0115500,TRIAE_CS42_6BS_TGACv1_513935_AA1652480,TRIAE_CS42_7DS_TGACv1_623117_AA2049760,TRIAE_CS42_7AL_TGACv1_556888_AA1772870,TRIAE_CS42_7AL_TGACv1_557898_AA1787490,TRIAE_CS42_4DL_TGACv1_343985_AA1142210,TRIAE_CS42_7BL_TGACv1_580117_AA1912080,TRIAE_CS4…
GO:0016043	cellular component organization	biological_process	1.2235e-22	1.4429e-20	185	1928	3438	74606	TRIAE_CS42_4DS_TGACv1_362799_AA1182230,TRIAE_CS42_U_TGACv1_644101_AA2137180,TRIAE_CS42_7DL_TGACv1_603134_AA1976600,TRIAE_CS42_6AS_TGACv1_487490_AA1570920,TRIAE_CS42_2BL_TGACv1_132610_AA0438600,TRIAE_CS42_1DL_TGACv1_062308_AA0212260,TRIAE_CS42_1AS_TGACv1_019520_AA0067630,TRIAE_CS42_1DL_TGACv1_064811_AA0235770,TRIAE_CS42_6BS_TGACv1_513207_AA1634500,TRIAE_CS42_6BS_TGACv1_513443_AA1641730,TRIAE_CS42_…
GO:0044710	single-organism metabolic process	biological_process	1.1485e-21	1.3311e-19	442	1928	11539	74606	TRIAE_CS42_5BL_TGACv1_406345_AA1344380,TRIAE_CS42_3B_TGACv1_220669_AA0714700,TRIAE_CS42_5AS_TGACv1_393328_AA1271350,TRIAE_CS42_4AL_TGACv1_289200_AA0967200,TRIAE_CS42_4BS_TGACv1_330819_AA1108930,TRIAE_CS42_1BL_TGACv1_032207_AA0126810,TRIAE_CS42_3B_TGACv1_223441_AA0782230,TRIAE_CS42_7BS_TGACv1_593415_AA1951220,TRIAE_CS42_2AL_TGACv1_094865_AA0304200,TRIAE_CS42_3DL_TGACv1_253234_AA0893850,TRIAE_CS42_…
GO:0072521	purine-containing compound metabolic process	biological_process	9.4401e-21	1.0669e-18	59	1928	534	74606	TRIAE_CS42_2AL_TGACv1_094486_AA0298610,TRIAE_CS42_1BL_TGACv1_030377_AA0088540,TRIAE_CS42_5DL_TGACv1_435540_AA1451810,TRIAE_CS42_U_TGACv1_642445_AA2117740,TRIAE_CS42_3AL_TGACv1_196429_AA0660330,TRIAE_CS42_5AL_TGACv1_374789_AA1209000,TRIAE_CS42_6AL_TGACv1_471945_AA1516140,TRIAE_CS42_7BL_TGACv1_579063_AA1903600,AIG90477,TRIAE_CS42_5DL_TGACv1_433836_AA1423410,TRIAE_CS42_2DL_TGACv1_158777_AA0526010,TR…
GO:0044444	cytoplasmic part	cellular_component	9.5232e-21	1.0669e-18	320	1928	6942	74606	TRIAE_CS42_6BS_TGACv1_514091_AA1654910,TRIAE_CS42_7DL_TGACv1_603543_AA1985490,TRIAE_CS42_3DL_TGACv1_250339_AA0866430,TRIAE_CS42_3DL_TGACv1_249293_AA0844440,TRIAE_CS42_1BS_TGACv1_049652_AA0158940,TRIAE_CS42_4AS_TGACv1_306673_AA1011900,TRIAE_CS42_3B_TGACv1_220835_AA0720860,TRIAE_CS42_7BS_TGACv1_592029_AA1928680,TRIAE_CS42_2AL_TGACv1_093096_AA0271930,TRIAE_CS42_1DL_TGACv1_061593_AA0199400,TRIAE_CS42…
GO:0048037	cofactor binding	molecular_function	1.4586e-20	1.6074e-18	102	1928	1508	74606	TRIAE_CS42_1AL_TGACv1_001065_AA0024290,TRIAE_CS42_7BL_TGACv1_581547_AA1917420,TRIAE_CS42_6BS_TGACv1_513935_AA1652480,TRIAE_CS42_3DL_TGACv1_249127_AA0838760,TRIAE_CS42_6DS_TGACv1_543365_AA1739120,TRIAE_CS42_2AL_TGACv1_094355_AA0296420,TRIAE_CS42_1AL_TGACv1_002153_AA0039220,TRIAE_CS42_3DS_TGACv1_272233_AA0917470,TRIAE_CS42_7BL_TGACv1_580117_AA1912080,TRIAE_CS42_1AL_TGACv1_000369_AA0010430,TRIAE_CS4…
GO:0071840	cellular component organization or biogenesis	biological_process	4.4555e-20	4.8306e-18	191	1928	3813	74606	TRIAE_CS42_2AL_TGACv1_101425_AA0327790,TRIAE_CS42_3B_TGACv1_220835_AA0720860,TRIAE_CS42_6BS_TGACv1_513638_AA1646430,TRIAE_CS42_6AS_TGACv1_486735_AA1564600,TRIAE_CS42_4BS_TGACv1_329163_AA1098380,TRIAE_CS42_4BL_TGACv1_320261_AA1032800,TRIAE_CS42_4DS_TGACv1_362355_AA1179020,TRIAE_CS42_4AS_TGACv1_307117_AA1017180,TRIAE_CS42_4BL_TGACv1_321242_AA1057770,TRIAE_CS42_2AL_TGACv1_093044_AA0270150,TRIAE_CS42…
GO:0016616	oxidoreductase activity, acting on the CH-OH group of donors, NAD or NADP as acceptor	molecular_function	4.6334e-20	4.9438e-18	42	1928	299	74606	TRIAE_CS42_5BL_TGACv1_404418_AA1299220,TRIAE_CS42_4BS_TGACv1_329796_AA1104090,TRIAE_CS42_2BL_TGACv1_130544_AA0413270,TRIAE_CS42_6AL_TGACv1_473897_AA1533380,TRIAE_CS42_6AS_TGACv1_487300_AA1569840,TRIAE_CS42_3DL_TGACv1_253234_AA0893850,TRIAE_CS42_4AL_TGACv1_288659_AA0954680,TRIAE_CS42_6AL_TGACv1_473639_AA1532140,TRIAE_CS42_1AL_TGACv1_000087_AA0002830,TRIAE_CS42_2AL_TGACv1_094054_AA0291710,TRIAE_CS4…
GO:0008150	biological_process	biological_process	7.7324e-20	8.1214e-18	1285	1928	42935	74606	TRIAE_CS42_6BL_TGACv1_499832_AA1592730,TRIAE_CS42_2DL_TGACv1_158158_AA0510910,TRIAE_CS42_1AL_TGACv1_005510_AA0054870,TRIAE_CS42_4DL_TGACv1_342497_AA1115230,TRIAE_CS42_7AS_TGACv1_570230_AA1832650,TRIAE_CS42_5AL_TGACv1_376972_AA1242830,TRIAE_CS42_7BS_TGACv1_593608_AA1953020,TRIAE_CS42_1BL_TGACv1_031047_AA0106660,TRIAE_CS42_5AL_TGACv1_375132_AA1216540,TRIAE_CS42_4DS_TGACv1_362974_AA1182930,TRIAE_CS4…
v1_098072_AA0325680,TRIAE_CS42_2DS_TGACv1_179678_AA0608530,TRIAE_CS42_U_TGACv1_641631_AA2100060,TRIAE_CS42_5AS_TGACv1_394157_AA1278420,TRIAE_CS42_1BL_TGACv1_031464_AA0114600,TRIAE_CS42_5AL_TGACv1_374631_AA1204970,TRIAE_CS42_5AL_TGACv1_374468_AA1200980,TRIAE_CS42_2DS_TGACv1_177357_AA0574350,TRIAE_CS42_4DL_TGACv1_342529_AA1115980,TRIAE_CS42_2BL_TGACv1_130578_AA0413940,TRIAE_CS42_1DL_TGACv1_062308_A…
GO:1901564	organonitrogen compound metabolic process	biological_process	2.9404e-19	3.0408e-17	206	1928	3888	74606	TRIAE_CS42_1AS_TGACv1_019912_AA0072730,TRIAE_CS42_6DL_TGACv1_526902_AA1694710,TRIAE_CS42_4AL_TGACv1_290117_AA0981910,TRIAE_CS42_4DS_TGACv1_361714_AA1171870,TRIAE_CS42_3DS_TGACv1_272233_AA0917470,TRIAE_CS42_1AL_TGACv1_000755_AA0018450,TRIAE_CS42_4AL_TGACv1_289336_AA0969290,TRIAE_CS42_7AL_TGACv1_557898_AA1787490,TRIAE_CS42_6DS_TGACv1_543365_AA1739120,TRIAE_CS42_7BL_TGACv1_581547_AA1917420,TRIAE_CS4…
GO:0009116	nucleoside metabolic process	biological_process	3.6437e-19	3.711e-17	57	1928	539	74606	TRIAE_CS42_6AL_TGACv1_471945_AA1516140,TRIAE_CS42_7BL_TGACv1_579063_AA1903600,AIG90477,TRIAE_CS42_5DL_TGACv1_435540_AA1451810,TRIAE_CS42_1BL_TGACv1_030377_AA0088540,TRIAE_CS42_2AL_TGACv1_094486_AA0298610,TRIAE_CS42_5AL_TGACv1_374789_AA1209000,TRIAE_CS42_3AL_TGACv1_196429_AA0660330,TRIAE_CS42_5BL_TGACv1_406155_AA1341460,TRIAE_CS42_6AL_TGACv1_475648_AA1536640,TRIAE_CS42_3AL_TGACv1_194635_AA0637160,…
GO:0009119	ribonucleoside metabolic process	biological_process	4.5907e-19	4.6058e-17	54	1928	490	74606	TRIAE_CS42_1AL_TGACv1_004040_AA0052320,TRIAE_CS42_3B_TGACv1_223258_AA0779170,TRIAE_CS42_5AL_TGACv1_375327_AA1219960,TRIAE_CS42_2DL_TGACv1_158777_AA0526010,TRIAE_CS42_5DL_TGACv1_433836_AA1423410,TRIAE_CS42_5BL_TGACv1_406155_AA1341460,TRIAE_CS42_3AL_TGACv1_194635_AA0637160,TRIAE_CS42_6AL_TGACv1_475648_AA1536640,TRIAE_CS42_3AL_TGACv1_196429_AA0660330,TRIAE_CS42_5AL_TGACv1_374789_AA1209000,TRIAE_CS42…
GO:1901657	glycosyl compound metabolic process	biological_process	6.1552e-19	6.0846e-17	57	1928	546	74606	TRIAE_CS42_2DL_TGACv1_158421_AA0518370,TRIAE_CS42_6BL_TGACv1_500297_AA1602810,TRIAE_CS42_2AS_TGACv1_112739_AA0344340,TRIAE_CS42_3DS_TGACv1_274021_AA0934410,TRIAE_CS42_6AL_TGACv1_472192_AA1519000,TRIAE_CS42_1AL_TGACv1_000755_AA0018450,TRIAE_CS42_7AS_TGACv1_570780_AA1840810,TRIAE_CS42_5BL_TGACv1_406279_AA1343630,TRIAE_CS42_6AL_TGACv1_473321_AA1530120,TRIAE_CS42_6AL_TGACv1_471645_AA1512290,TRIAE_CS4…
GO:0098805	whole membrane	cellular_component	1.1549e-18	1.1251e-16	56	1928	551	74606	TRIAE_CS42_4DS_TGACv1_361471_AA1168550,TRIAE_CS42_1AL_TGACv1_001331_AA0028860,TRIAE_CS42_3DL_TGACv1_250988_AA0875910,TRIAE_CS42_2BL_TGACv1_131580_AA0429350,TRIAE_CS42_5DL_TGACv1_433800_AA1422410,TRIAE_CS42_U_TGACv1_641184_AA2087580,TRIAE_CS42_3AL_TGACv1_194730_AA0638300,TRIAE_CS42_3B_TGACv1_221849_AA0751620,TRIAE_CS42_1DL_TGACv1_061704_AA0201970,TRIAE_CS42_5AL_TGACv1_375477_AA1222460,TRIAE_CS42_2…
GO:0051287	NAD binding	molecular_function	1.5127e-18	1.4526e-16	33	1928	196	74606	TRIAE_CS42_7BL_TGACv1_580117_AA1912080,TRIAE_CS42_2BL_TGACv1_129772_AA0395390,TRIAE_CS42_2DL_TGACv1_159084_AA0532060,TRIAE_CS42_1AL_TGACv1_000369_AA0010430,TRIAE_CS42_U_TGACv1_645225_AA2143600,TRIAE_CS42_7AS_TGACv1_571185_AA1845550,TRIAE_CS42_4AL_TGACv1_288429_AA0948580,TRIAE_CS42_2AL_TGACv1_093558_AA0282560,TRIAE_CS42_6DS_TGACv1_542766_AA1729850,TRIAE_CS42_4DS_TGACv1_361591_AA1170510,TRIAE_CS42_…
GO:0042278	purine nucleoside metabolic process	biological_process	2.8939e-18	2.7017e-16	51	1928	454	74606	TRIAE_CS42_2DL_TGACv1_158421_AA0518370,TRIAE_CS42_6BL_TGACv1_500297_AA1602810,TRIAE_CS42_2AS_TGACv1_112739_AA0344340,TRIAE_CS42_3DS_TGACv1_274021_AA0934410,TRIAE_CS42_1AL_TGACv1_000755_AA0018450,TRIAE_CS42_7AS_TGACv1_570780_AA1840810,TRIAE_CS42_5BL_TGACv1_406279_AA1343630,TRIAE_CS42_6AL_TGACv1_473321_AA1530120,TRIAE_CS42_6AL_TGACv1_471645_AA1512290,TRIAE_CS42_6BL_TGACv1_499577_AA1586520,TRIAE_CS4…
GO:0046128	purine ribonucleoside metabolic process	biological_process	2.8939e-18	2.7017e-16	51	1928	454	74606	TRIAE_CS42_3AL_TGACv1_194635_AA0637160,TRIAE_CS42_6AL_TGACv1_475648_AA1536640,TRIAE_CS42_5BL_TGACv1_406155_AA1341460,TRIAE_CS42_1AL_TGACv1_004040_AA0052320,TRIAE_CS42_5DL_TGACv1_433836_AA1423410,TRIAE_CS42_2DL_TGACv1_158777_AA0526010,TRIAE_CS42_5AL_TGACv1_375327_AA1219960,AIG90477,TRIAE_CS42_7BL_TGACv1_579063_AA1903600,TRIAE_CS42_6AL_TGACv1_471945_AA1516140,TRIAE_CS42_5AL_TGACv1_374789_AA1209000,…
GO:0055086	nucleobase-containing small molecule metabolic process	biological_process	1.7888e-17	1.6472e-15	68	1928	806	74606	TRIAE_CS42_1DL_TGACv1_063573_AA0228750,TRIAE_CS42_2AS_TGACv1_112739_AA0344340,TRIAE_CS42_6BL_TGACv1_500297_AA1602810,TRIAE_CS42_1AL_TGACv1_000755_AA0018450,TRIAE_CS42_6AL_TGACv1_471645_AA1512290,TRIAE_CS42_1DL_TGACv1_061176_AA0187850,TRIAE_CS42_6BL_TGACv1_499577_AA1586520,TRIAE_CS42_6DL_TGACv1_526382_AA1681340,TRIAE_CS42_5DS_TGACv1_457334_AA1485300,TRIAE_CS42_3DL_TGACv1_250475_AA0868810,TRIAE_CS4…
GO:0032787	monocarboxylic acid metabolic process	biological_process	2.7239e-17	2.4743e-15	65	1928	809	74606	TRIAE_CS42_7DS_TGACv1_622381_AA2038650,TRIAE_CS42_2BS_TGACv1_147224_AA0480120,TRIAE_CS42_5BL_TGACv1_404481_AA1301440,TRIAE_CS42_4BS_TGACv1_330279_AA1106910,TRIAE_CS42_2AS_TGACv1_112777_AA0345060,TRIAE_CS42_5AL_TGACv1_376570_AA1238560,TRIAE_CS42_6DL_TGACv1_526391_AA1681850,TRIAE_CS42_7AS_TGACv1_572202_AA1851680,TRIAE_CS42_5BS_TGACv1_423965_AA1385430,TRIAE_CS42_1DL_TGACv1_063603_AA0229020,TRIAE_CS4…
GO:0003674	molecular_function	molecular_function	2.829e-17	2.5356e-15	1653	1928	60525	74606	TRIAE_CS42_3AS_TGACv1_210938_AA0681720,TRIAE_CS42_4DS_TGACv1_361403_AA1167180,TRIAE_CS42_5BL_TGACv1_405811_AA1335620,TRIAE_CS42_7BL_TGACv1_578106_AA1889550,TRIAE_CS42_2DS_TGACv1_178240_AA0593320,TRIAE_CS42_2BS_TGACv1_147826_AA0487990,TRIAE_CS42_2BL_TGACv1_131341_AA0426390,TRIAE_CS42_6BL_TGACv1_500845_AA1610610,TRIAE_CS42_1AL_TGACv1_000051_AA0001350,TRIAE_CS42_5BL_TGACv1_405283_AA1324030,AIG90477,…
42_1DL_TGACv1_061593_AA0199400,TRIAE_CS42_4AL_TGACv1_291661_AA0995860,TRIAE_CS42_4AS_TGACv1_306673_AA1011900,TRIAE_CS42_2AL_TGACv1_101425_AA0327790,TRIAE_CS42_3B_TGACv1_220835_AA0720860,TRIAE_CS42_7AL_TGACv1_556037_AA1753310,TRIAE_CS42_5BL_TGACv1_405915_AA1337580,TRIAE_CS42_3DS_TGACv1_273254_AA0929940,TRIAE_CS42_6DS_TGACv1_542697_AA1728230,TRIAE_CS42_2BL_TGACv1_132371_AA0437200,TRIAE_CS42_7DL_TGA…
GO:0016053	organic acid biosynthetic process	biological_process	1.7641e-16	1.54e-14	67	1928	873	74606	TRIAE_CS42_5AL_TGACv1_375039_AA1214530,TRIAE_CS42_U_TGACv1_644014_AA2136450,TRIAE_CS42_U_TGACv1_641465_AA2095880,TRIAE_CS42_1BL_TGACv1_030654_AA0097000,TRIAE_CS42_2BL_TGACv1_130544_AA0413270,TRIAE_CS42_7AS_TGACv1_572202_AA1851680,TRIAE_CS42_6DL_TGACv1_526391_AA1681850,TRIAE_CS42_4DL_TGACv1_343385_AA1133850,TRIAE_CS42_5BL_TGACv1_404481_AA1301440,TRIAE_CS42_7DS_TGACv1_622381_AA2038650,TRIAE_CS42_2B…
GO:0046394	carboxylic acid biosynthetic process	biological_process	1.7641e-16	1.54e-14	67	1928	873	74606	TRIAE_CS42_7BS_TGACv1_591992_AA1927520,TRIAE_CS42_1DL_TGACv1_061125_AA0186220,TRIAE_CS42_1AL_TGACv1_001479_AA0031070,TRIAE_CS42_7BS_TGACv1_592934_AA1946410,TRIAE_CS42_1AL_TGACv1_000132_AA0004290,TRIAE_CS42_1AL_TGACv1_000254_AA0007380,TRIAE_CS42_2BL_TGACv1_129465_AA0384880,TRIAE_CS42_4AS_TGACv1_307275_AA1019080,TRIAE_CS42_4AS_TGACv1_307728_AA1023060,TRIAE_CS42_U_TGACv1_641432_AA2094970,TRIAE_CS42_…
GO:0016614	oxidoreductase activity, acting on CH-OH group of donors	molecular_function	2.5528e-16	2.2e-14	50	1928	551	74606	TRIAE_CS42_1DL_TGACv1_061075_AA0184240,TRIAE_CS42_1DL_TGACv1_062583_AA0216850,TRIAE_CS42_1AL_TGACv1_002631_AA0043990,TRIAE_CS42_6AS_TGACv1_485172_AA1538810,TRIAE_CS42_7BL_TGACv1_578344_AA1893330,TRIAE_CS42_6DL_TGACv1_528145_AA1711960,TRIAE_CS42_2BL_TGACv1_129465_AA0384880,TRIAE_CS42_2DL_TGACv1_160628_AA0552420,TRIAE_CS42_5DL_TGACv1_433028_AA1398770,TRIAE_CS42_7BL_TGACv1_577913_AA1885930,TRIAE_CS4…
GO:0030660	Golgi-associated vesicle membrane	cellular_component	6.2933e-16	5.3549e-14	16	1928	50	74606	TRIAE_CS42_1AL_TGACv1_001331_AA0028860,TRIAE_CS42_5AL_TGACv1_374774_AA1208800,TRIAE_CS42_6BS_TGACv1_514683_AA1663200,TRIAE_CS42_1BL_TGACv1_031076_AA0107250,TRIAE_CS42_4BL_TGACv1_321458_AA1060720,TRIAE_CS42_7DS_TGACv1_623122_AA2049790,TRIAE_CS42_4DS_TGACv1_362497_AA1180110,TRIAE_CS42_4BS_TGACv1_328452_AA1088030,TRIAE_CS42_7AS_TGACv1_571321_AA1846800,TRIAE_CS42_6DS_TGACv1_542583_AA1724790,TRIAE_CS4…
GO:0019637	organophosphate metabolic process	biological_process	2.8725e-15	2.4137e-13	78	1928	1170	74606	AIG90477,TRIAE_CS42_5BL_TGACv1_404367_AA1297090,TRIAE_CS42_5BS_TGACv1_424804_AA1391850,TRIAE_CS42_3AL_TGACv1_196429_AA0660330,TRIAE_CS42_U_TGACv1_642445_AA2117740,TRIAE_CS42_5DL_TGACv1_435540_AA1451810,TRIAE_CS42_1BL_TGACv1_030377_AA0088540,TRIAE_CS42_3AL_TGACv1_194635_AA0637160,TRIAE_CS42_5DL_TGACv1_433836_AA1423410,TRIAE_CS42_4BS_TGACv1_328490_AA1088680,TRIAE_CS42_7BS_TGACv1_592594_AA1941060,TR…
GO:0006790	sulfur compound metabolic process	biological_process	4.5216e-15	3.7524e-13	35	1928	291	74606	TRIAE_CS42_1BL_TGACv1_030654_AA0097000,TRIAE_CS42_5DS_TGACv1_456564_AA1474130,TRIAE_CS42_2AL_TGACv1_094077_AA0292200,TRIAE_CS42_7DS_TGACv1_624143_AA2059180,TRIAE_CS42_4DL_TGACv1_343385_AA1133850,TRIAE_CS42_5BL_TGACv1_406345_AA1344380,TRIAE_CS42_5BL_TGACv1_404702_AA1308880,TRIAE_CS42_3B_TGACv1_223441_AA0782230,TRIAE_CS42_3AS_TGACv1_213440_AA0706960,TRIAE_CS42_4BS_TGACv1_330819_AA1108930,TRIAE_CS42…
GO:0030662	coated vesicle membrane	cellular_component	5.613e-15	4.6013e-13	20	1928	92	74606	TRIAE_CS42_4DS_TGACv1_361471_AA1168550,TRIAE_CS42_1AL_TGACv1_001331_AA0028860,TRIAE_CS42_1BL_TGACv1_031076_AA0107250,TRIAE_CS42_6BS_TGACv1_514683_AA1663200,TRIAE_CS42_5AL_TGACv1_374774_AA1208800,TRIAE_CS42_4BL_TGACv1_321458_AA1060720,TRIAE_CS42_7DS_TGACv1_623122_AA2049790,TRIAE_CS42_4DS_TGACv1_362497_AA1180110,TRIAE_CS42_2BL_TGACv1_131305_AA0425720,TRIAE_CS42_4BS_TGACv1_328452_AA1088030,TRIAE_CS4…
GO:0044723	single-organism carbohydrate metabolic process	biological_process	9.141e-15	7.4031e-13	80	1928	1358	74606	TRIAE_CS42_2AS_TGACv1_112739_AA0344340,TRIAE_CS42_2DS_TGACv1_177436_AA0577070,TRIAE_CS42_4DS_TGACv1_361657_AA1171120,TRIAE_CS42_4AL_TGACv1_288429_AA0948580,TRIAE_CS42_1BL_TGACv1_031136_AA0108420,TRIAE_CS42_2AS_TGACv1_112396_AA0337300,TRIAE_CS42_1BL_TGACv1_031944_AA0123110,TRIAE_CS42_6AL_TGACv1_471645_AA1512290,TRIAE_CS42_6BS_TGACv1_513935_AA1652480,TRIAE_CS42_2BL_TGACv1_131489_AA0428400,TRIAE_CS4…
GO:0030135	coated vesicle	cellular_component	1.0849e-14	8.6815e-13	23	1928	133	74606	TRIAE_CS42_7DS_TGACv1_623122_AA2049790,TRIAE_CS42_3AL_TGACv1_194328_AA0631110,TRIAE_CS42_3B_TGACv1_220835_AA0720860,TRIAE_CS42_4BL_TGACv1_321458_AA1060720,TRIAE_CS42_5AL_TGACv1_374774_AA1208800,TRIAE_CS42_6BS_TGACv1_514683_AA1663200,TRIAE_CS42_1BL_TGACv1_031076_AA0107250,TRIAE_CS42_1AL_TGACv1_001331_AA0028860,TRIAE_CS42_4DS_TGACv1_361471_AA1168550,TRIAE_CS42_6AS_TGACv1_486272_AA1559050,TRIAE_CS42…
GO:0009987	cellular process	biological_process	1.5635e-14	1.2365e-12	926	1928	30445	74606	TRIAE_CS42_1BL_TGACv1_031614_AA0117220,TRIAE_CS42_2DL_TGACv1_157905_AA0501220,TRIAE_CS42_1BL_TGACv1_030950_AA0104200,TRIAE_CS42_7DL_TGACv1_605837_AA2008220,TRIAE_CS42_5BL_TGACv1_404530_AA1303120,TRIAE_CS42_3B_TGACv1_223525_AA0783520,TRIAE_CS42_1DL_TGACv1_061263_AA0190450,TRIAE_CS42_5BL_TGACv1_404684_AA1308350,TRIAE_CS42_2AL_TGACv1_096359_AA0318830,TRIAE_CS42_7AL_TGACv1_556776_AA1770590,TRIAE_CS42…
1_062419_AA0214280,TRIAE_CS42_1BL_TGACv1_031047_AA0106660,TRIAE_CS42_4AS_TGACv1_306214_AA1004350,TRIAE_CS42_1DL_TGACv1_063317_AA0226260,TRIAE_CS42_4DL_TGACv1_342497_AA1115230,TRIAE_CS42_5DL_TGACv1_434840_AA1442370,TRIAE_CS42_3B_TGACv1_223093_AA0776380,TRIAE_CS42_7BS_TGACv1_593608_AA1953020,TRIAE_CS42_2AL_TGACv1_095006_AA0305840,TRIAE_CS42_1DL_TGACv1_061317_AA0192320,TRIAE_CS42_1AL_TGACv1_004040_A…
GO:0006732	coenzyme metabolic process	biological_process	1.9902e-14	1.5556e-12	47	1928	520	74606	TRIAE_CS42_6AL_TGACv1_473639_AA1532140,TRIAE_CS42_6AL_TGACv1_471945_AA1516140,TRIAE_CS42_5DL_TGACv1_435540_AA1451810,TRIAE_CS42_1DL_TGACv1_061125_AA0186220,TRIAE_CS42_5AL_TGACv1_374789_AA1209000,TRIAE_CS42_3AL_TGACv1_196429_AA0660330,TRIAE_CS42_6AL_TGACv1_475648_AA1536640,TRIAE_CS42_3AL_TGACv1_194635_AA0637160,TRIAE_CS42_5BL_TGACv1_406155_AA1341460,TRIAE_CS42_5DL_TGACv1_433836_AA1423410,TRIAE_CS4…
GO:1901605	alpha-amino acid metabolic process	biological_process	2.1778e-14	1.6826e-12	49	1928	573	74606	TRIAE_CS42_2DL_TGACv1_158777_AA0526010,TRIAE_CS42_4AS_TGACv1_307275_AA1019080,TRIAE_CS42_3B_TGACv1_223258_AA0779170,TRIAE_CS42_3AS_TGACv1_211026_AA0683390,TRIAE_CS42_1AL_TGACv1_000254_AA0007380,TRIAE_CS42_2DS_TGACv1_177565_AA0580190,TRIAE_CS42_2DL_TGACv1_160628_AA0552420,TRIAE_CS42_6BL_TGACv1_500652_AA1608010,TRIAE_CS42_4AS_TGACv1_307728_AA1023060,TRIAE_CS42_2AL_TGACv1_094486_AA0298610,TRIAE_CS42…
GO:0030659	cytoplasmic vesicle membrane	cellular_component	3.1165e-14	2.3805e-12	22	1928	119	74606	TRIAE_CS42_4BS_TGACv1_328452_AA1088030,TRIAE_CS42_2DL_TGACv1_158815_AA0526570,TRIAE_CS42_U_TGACv1_642388_AA2116800,TRIAE_CS42_2BL_TGACv1_131305_AA0425720,TRIAE_CS42_4DS_TGACv1_362497_AA1180110,TRIAE_CS42_7DL_TGACv1_602635_AA1963430,TRIAE_CS42_6AL_TGACv1_471165_AA1503930,TRIAE_CS42_U_TGACv1_641043_AA2083140,TRIAE_CS42_4AL_TGACv1_288747_AA0957130,TRIAE_CS42_6AS_TGACv1_486272_AA1559050,TRIAE_CS42_1D…
GO:0006260	DNA replication	biological_process	4.1191e-14	3.1111e-12	33	1928	283	74606	TRIAE_CS42_2AL_TGACv1_094809_AA0303420,TRIAE_CS42_6DL_TGACv1_526369_AA1681040,TRIAE_CS42_6DL_TGACv1_526389_AA1681790,TRIAE_CS42_2AL_TGACv1_096359_AA0318830,TRIAE_CS42_6DL_TGACv1_527835_AA1709090,TRIAE_CS42_5AS_TGACv1_393478_AA1272980,TRIAE_CS42_1DL_TGACv1_063075_AA0223620,TRIAE_CS42_U_TGACv1_640995_AA2081800,TRIAE_CS42_4DS_TGACv1_362355_AA1179020,TRIAE_CS42_5DL_TGACv1_434543_AA1437830,TRIAE_CS42_…
GO:0006090	pyruvate metabolic process	biological_process	4.3403e-14	3.2417e-12	28	1928	203	74606	TRIAE_CS42_5DS_TGACv1_457334_AA1485300,TRIAE_CS42_5DL_TGACv1_433836_AA1423410,TRIAE_CS42_5AS_TGACv1_394202_AA1278730,TRIAE_CS42_3DL_TGACv1_250475_AA0868810,TRIAE_CS42_3AL_TGACv1_194635_AA0637160,TRIAE_CS42_1BL_TGACv1_030605_AA0095500,TRIAE_CS42_6BS_TGACv1_514091_AA1654910,TRIAE_CS42_3AL_TGACv1_196429_AA0660330,TRIAE_CS42_1DS_TGACv1_081340_AA0260080,TRIAE_CS42_1AL_TGACv1_000755_AA0018450,TRIAE_CS4…
GO:0044433	cytoplasmic vesicle part	cellular_component	4.5294e-14	3.3458e-12	22	1928	122	74606	TRIAE_CS42_4DS_TGACv1_362497_AA1180110,TRIAE_CS42_2BL_TGACv1_131305_AA0425720,TRIAE_CS42_U_TGACv1_642388_AA2116800,TRIAE_CS42_2DL_TGACv1_158815_AA0526570,TRIAE_CS42_4BS_TGACv1_328452_AA1088030,TRIAE_CS42_7AS_TGACv1_571321_AA1846800,TRIAE_CS42_6DS_TGACv1_542583_AA1724790,TRIAE_CS42_7AL_TGACv1_556695_AA1769100,TRIAE_CS42_4BL_TGACv1_320261_AA1032800,TRIAE_CS42_6AS_TGACv1_486272_AA1559050,TRIAE_CS42_…
GO:1901135	carbohydrate derivative metabolic process	biological_process	4.9246e-14	3.5982e-12	81	1928	1293	74606	TRIAE_CS42_7BS_TGACv1_592783_AA1944260,TRIAE_CS42_6BL_TGACv1_499716_AA1589820,TRIAE_CS42_3AS_TGACv1_211158_AA0686190,TRIAE_CS42_3AS_TGACv1_213440_AA0706960,TRIAE_CS42_6DS_TGACv1_543692_AA1743160,TRIAE_CS42_4BS_TGACv1_330279_AA1106910,TRIAE_CS42_5AL_TGACv1_376570_AA1238560,TRIAE_CS42_4AL_TGACv1_288659_AA0954680,TRIAE_CS42_1DL_TGACv1_063603_AA0229020,TRIAE_CS42_5BS_TGACv1_423965_AA1385430,TRIAE_CS4…
GO:0012506	vesicle membrane	cellular_component	5.9099e-14	4.2717e-12	22	1928	122	74606	TRIAE_CS42_5AL_TGACv1_374774_AA1208800,TRIAE_CS42_6BS_TGACv1_514683_AA1663200,TRIAE_CS42_1BL_TGACv1_031076_AA0107250,TRIAE_CS42_1AL_TGACv1_001331_AA0028860,TRIAE_CS42_4DS_TGACv1_361471_AA1168550,TRIAE_CS42_7DS_TGACv1_623122_AA2049790,TRIAE_CS42_4BL_TGACv1_321458_AA1060720,TRIAE_CS42_U_TGACv1_642388_AA2116800,TRIAE_CS42_4BS_TGACv1_328452_AA1088030,TRIAE_CS42_2DL_TGACv1_158815_AA0526570,TRIAE_CS42_…
GO:0031410	cytoplasmic vesicle	cellular_component	6.6992e-14	4.7906e-12	26	1928	183	74606	TRIAE_CS42_1AL_TGACv1_001331_AA0028860,TRIAE_CS42_4DS_TGACv1_361471_AA1168550,TRIAE_CS42_5AL_TGACv1_374774_AA1208800,TRIAE_CS42_2AL_TGACv1_096831_AA0321630,TRIAE_CS42_1BL_TGACv1_031076_AA0107250,TRIAE_CS42_6BS_TGACv1_514683_AA1663200,TRIAE_CS42_4BL_TGACv1_321458_AA1060720,TRIAE_CS42_3B_TGACv1_220835_AA0720860,TRIAE_CS42_3AL_TGACv1_194328_AA0631110,TRIAE_CS42_7DS_TGACv1_623122_AA2049790,TRIAE_CS42…
GO:0009765	photosynthesis, light harvesting	biological_process	8.2903e-14	5.866e-12	23	1928	102	74606	TRIAE_CS42_5BL_TGACv1_404454_AA1300370,TRIAE_CS42_U_TGACv1_643126_AA2127630,TRIAE_CS42_6BS_TGACv1_514208_AA1656950,TRIAE_CS42_1BL_TGACv1_030603_AA0095440,TRIAE_CS42_1BL_TGACv1_033509_AA0140020,TRIAE_CS42_1DL_TGACv1_061593_AA0199390,TRIAE_CS42_6AS_TGACv1_485824_AA1552850,TRIAE_CS42_6AS_TGACv1_485824_AA1552860,TRIAE_CS42_6BS_TGACv1_514208_AA1656990,TRIAE_CS42_6DS_TGACv1_543042_AA1734510,TRIAE_CS42_…
GO:0019693	ribose phosphate metabolic process	biological_process	9.3669e-14	6.5588e-12	48	1928	537	74606	TRIAE_CS42_6AL_TGACv1_471645_AA1512290,TRIAE_CS42_5BL_TGACv1_406279_AA1343630,TRIAE_CS42_6AL_TGACv1_473321_AA1530120,TRIAE_CS42_7AS_TGACv1_570780_AA1840810,TRIAE_CS42_1AL_TGACv1_000755_AA0018450,TRIAE_CS42_2AS_TGACv1_112739_AA0344340,TRIAE_CS42_1DL_TGACv1_063573_AA0228750,TRIAE_CS42_2DL_TGACv1_158421_AA0518370,TRIAE_CS42_1BL_TGACv1_030605_AA0095500,TRIAE_CS42_1AL_TGACv1_000512_AA0013610,TRIAE_CS4…
GO:0018298	protein-chromophore linkage	biological_process	1.041e-13	7.2138e-12	23	1928	106	74606	TRIAE_CS42_6AS_TGACv1_486605_AA1563110,TRIAE_CS42_7BS_TGACv1_592029_AA1928690,TRIAE_CS42_7DS_TGACv1_625332_AA2064910,TRIAE_CS42_6AS_TGACv1_485824_AA1552830,TRIAE_CS42_5BL_TGACv1_404454_AA1300300,TRIAE_CS42_7AS_TGACv1_569064_AA1806110,TRIAE_CS42_5DL_TGACv1_434747_AA1440970,TRIAE_CS42_1DL_TGACv1_061593_AA0199400,TRIAE_CS42_6AS_TGACv1_485824_AA1552840,TRIAE_CS42_1AL_TGACv1_009365_AA0055660,TRIAE_CS4…
GO:0008652	cellular amino acid biosynthetic process	biological_process	1.2086e-13	8.2901e-12	41	1928	432	74606	TRIAE_CS42_5BL_TGACv1_404321_AA1295470,TRIAE_CS42_1AL_TGACv1_001479_AA0031070,TRIAE_CS42_4AS_TGACv1_307275_AA1019080,TRIAE_CS42_1AL_TGACv1_000254_AA0007380,TRIAE_CS42_2DL_TGACv1_160628_AA0552420,TRIAE_CS42_2DS_TGACv1_177565_AA0580190,TRIAE_CS42_6BL_TGACv1_500652_AA1608010,TRIAE_CS42_4AS_TGACv1_307728_AA1023060,TRIAE_CS42_U_TGACv1_641432_AA2094970,TRIAE_CS42_4DL_TGACv1_343385_AA1133850,TRIAE_CS42_…
GO:0050662	coenzyme binding	molecular_function	1.4486e-13	9.8359e-12	73	1928	1162	74606	TRIAE_CS42_4AL_TGACv1_291220_AA0993030,TRIAE_CS42_6DL_TGACv1_527865_AA1709380,TRIAE_CS42_5AL_TGACv1_377360_AA1246170,TRIAE_CS42_2BL_TGACv1_130544_AA0413270,TRIAE_CS42_4BS_TGACv1_329796_AA1104090,TRIAE_CS42_2DL_TGACv1_160628_AA0552420,TRIAE_CS42_2DL_TGACv1_158777_AA0526010,TRIAE_CS42_5DL_TGACv1_433028_AA1398770,TRIAE_CS42_6DS_TGACv1_543770_AA1744010,TRIAE_CS42_1DL_TGACv1_061075_AA0184240,TRIAE_CS4…
GO:0031982	vesicle	cellular_component	1.9969e-13	1.3423e-11	26	1928	190	74606	TRIAE_CS42_7DS_TGACv1_623122_AA2049790,TRIAE_CS42_3AL_TGACv1_194328_AA0631110,TRIAE_CS42_3B_TGACv1_220835_AA0720860,TRIAE_CS42_4BL_TGACv1_321458_AA1060720,TRIAE_CS42_2AL_TGACv1_096831_AA0321630,TRIAE_CS42_5AL_TGACv1_374774_AA1208800,TRIAE_CS42_6BS_TGACv1_514683_AA1663200,TRIAE_CS42_1BL_TGACv1_031076_AA0107250,TRIAE_CS42_1AL_TGACv1_001331_AA0028860,TRIAE_CS42_4DS_TGACv1_361471_AA1168550,TRIAE_CS42…
GO:0005798	Golgi-associated vesicle	cellular_component	2.1655e-13	1.4412e-11	16	1928	66	74606	TRIAE_CS42_1BL_TGACv1_031076_AA0107250,TRIAE_CS42_6BS_TGACv1_514683_AA1663200,TRIAE_CS42_5AL_TGACv1_374774_AA1208800,TRIAE_CS42_1AL_TGACv1_001331_AA0028860,TRIAE_CS42_7DS_TGACv1_623122_AA2049790,TRIAE_CS42_4BL_TGACv1_321458_AA1060720,TRIAE_CS42_4BS_TGACv1_328452_AA1088030,TRIAE_CS42_4DS_TGACv1_362497_AA1180110,TRIAE_CS42_U_TGACv1_641043_AA2083140,TRIAE_CS42_7DL_TGACv1_602635_AA1963430,TRIAE_CS42_…
GO:0016168	chlorophyll binding	molecular_function	2.2754e-13	1.4995e-11	23	1928	104	74606	TRIAE_CS42_1BL_TGACv1_030603_AA0095440,TRIAE_CS42_1BL_TGACv1_033509_AA0140020,TRIAE_CS42_U_TGACv1_643126_AA2127630,TRIAE_CS42_5BL_TGACv1_404454_AA1300370,TRIAE_CS42_6BS_TGACv1_514208_AA1656950,TRIAE_CS42_1DL_TGACv1_061593_AA0199390,TRIAE_CS42_6AS_TGACv1_485824_AA1552850,TRIAE_CS42_6AS_TGACv1_485824_AA1552860,TRIAE_CS42_6BS_TGACv1_514208_AA1656990,TRIAE_CS42_6DS_TGACv1_543042_AA1734510,TRIAE_CS42_…
GO:0046165	alcohol biosynthetic process	biological_process	2.4476e-13	1.5973e-11	19	1928	86	74606	TRIAE_CS42_3AL_TGACv1_194203_AA0628440,TRIAE_CS42_1DL_TGACv1_062419_AA0214280,TRIAE_CS42_1DL_TGACv1_063094_AA0223830,TRIAE_CS42_7DL_TGACv1_603779_AA1989110,TRIAE_CS42_1AL_TGACv1_000734_AA0018090,TRIAE_CS42_7DS_TGACv1_623117_AA2049760,TRIAE_CS42_7AL_TGACv1_556888_AA1772870,TRIAE_CS42_5DL_TGACv1_433402_AA1412060,TRIAE_CS42_1BL_TGACv1_032207_AA0126810,TRIAE_CS42_7BS_TGACv1_591893_AA1924780,TRIAE_CS4…
GO:1901607	alpha-amino acid biosynthetic process	biological_process	3.4445e-13	2.2264e-11	37	1928	368	74606	TRIAE_CS42_2BS_TGACv1_146384_AA0464010,TRIAE_CS42_5AL_TGACv1_375039_AA1214530,TRIAE_CS42_7DS_TGACv1_624143_AA2059180,TRIAE_CS42_2AL_TGACv1_094077_AA0292210,TRIAE_CS42_5DS_TGACv1_456564_AA1474130,TRIAE_CS42_U_TGACv1_641465_AA2095880,TRIAE_CS42_5AS_TGACv1_393328_AA1271350,TRIAE_CS42_4BS_TGACv1_330819_AA1108930,TRIAE_CS42_2BL_TGACv1_130544_AA0413270,TRIAE_CS42_4DL_TGACv1_343385_AA1133850,TRIAE_CS42_…
GO:0016023	cytoplasmic membrane-bounded vesicle	cellular_component	3.7823e-13	2.4214e-11	25	1928	181	74606	TRIAE_CS42_4AL_TGACv1_288747_AA0957130,TRIAE_CS42_7DL_TGACv1_602635_AA1963430,TRIAE_CS42_U_TGACv1_641043_AA2083140,TRIAE_CS42_6AL_TGACv1_471165_AA1503930,TRIAE_CS42_1DL_TGACv1_061297_AA0191640,TRIAE_CS42_6AS_TGACv1_486272_AA1559050,TRIAE_CS42_4BL_TGACv1_320261_AA1032800,TRIAE_CS42_7AL_TGACv1_556695_AA1769100,TRIAE_CS42_6DS_TGACv1_542583_AA1724790,TRIAE_CS42_7AS_TGACv1_571321_AA1846800,TRIAE_CS42_…
GO:0009259	ribonucleotide metabolic process	biological_process	5.1189e-13	3.2461e-11	44	1928	480	74606	TRIAE_CS42_5BL_TGACv1_406155_AA1341460,TRIAE_CS42_3AL_TGACv1_194635_AA0637160,TRIAE_CS42_5DL_TGACv1_433836_AA1423410,TRIAE_CS42_1AL_TGACv1_004040_AA0052320,TRIAE_CS42_3B_TGACv1_223258_AA0779170,TRIAE_CS42_7BL_TGACv1_579063_AA1903600,AIG90477,TRIAE_CS42_5DL_TGACv1_435540_AA1451810,TRIAE_CS42_1BL_TGACv1_030377_AA0088540,TRIAE_CS42_5AL_TGACv1_374789_AA1209000,TRIAE_CS42_3AL_TGACv1_196429_AA0660330,T…
GO:0051186	cofactor metabolic process	biological_process	5.7311e-13	3.6004e-11	52	1928	681	74606	TRIAE_CS42_5BL_TGACv1_406155_AA1341460,TRIAE_CS42_3AL_TGACv1_194635_AA0637160,TRIAE_CS42_6AL_TGACv1_475648_AA1536640,TRIAE_CS42_5DL_TGACv1_433836_AA1423410,TRIAE_CS42_1AL_TGACv1_000132_AA0004290,TRIAE_CS42_6AL_TGACv1_473639_AA1532140,TRIAE_CS42_7BS_TGACv1_592934_AA1946410,TRIAE_CS42_6AL_TGACv1_471945_AA1516140,TRIAE_CS42_5DL_TGACv1_435540_AA1451810,TRIAE_CS42_1DL_TGACv1_061125_AA0186220,TRIAE_CS4…
GO:0006520	cellular amino acid metabolic process	biological_process	7.7021e-13	4.7939e-11	66	1928	1048	74606	TRIAE_CS42_6BL_TGACv1_500652_AA1608010,TRIAE_CS42_2DL_TGACv1_158777_AA0526010,TRIAE_CS42_3AS_TGACv1_211026_AA0683390,TRIAE_CS42_6AS_TGACv1_486551_AA1562560,TRIAE_CS42_3B_TGACv1_223258_AA0779170,TRIAE_CS42_2DS_TGACv1_177565_AA0580190,TRIAE_CS42_2DL_TGACv1_160628_AA0552420,TRIAE_CS42_5BL_TGACv1_404321_AA1295470,TRIAE_CS42_6AL_TGACv1_471819_AA1514670,TRIAE_CS42_5AL_TGACv1_375039_AA1214530,TRIAE_CS42…
GO:0031988	membrane-bounded vesicle	cellular_component	8.5731e-13	5.287e-11	25	1928	187	74606	TRIAE_CS42_7AL_TGACv1_556695_AA1769100,TRIAE_CS42_4BL_TGACv1_320261_AA1032800,TRIAE_CS42_6DS_TGACv1_542583_AA1724790,TRIAE_CS42_7AS_TGACv1_571321_AA1846800,TRIAE_CS42_4AL_TGACv1_288747_AA0957130,TRIAE_CS42_U_TGACv1_641043_AA2083140,TRIAE_CS42_7DL_TGACv1_602635_AA1963430,TRIAE_CS42_6AL_TGACv1_471165_AA1503930,TRIAE_CS42_1DL_TGACv1_061297_AA0191640,TRIAE_CS42_6AS_TGACv1_486272_AA1559050,TRIAE_CS42_…
GO:0006165	nucleoside diphosphate phosphorylation	biological_process	1.0852e-12	6.6317e-11	26	1928	192	74606	TRIAE_CS42_5BS_TGACv1_423965_AA1385430,TRIAE_CS42_7DS_TGACv1_622764_AA2045010,TRIAE_CS42_1DL_TGACv1_063603_AA0229020,TRIAE_CS42_5BL_TGACv1_406279_AA1343630,TRIAE_CS42_6AL_TGACv1_471645_AA1512290,TRIAE_CS42_4DS_TGACv1_362522_AA1180350,TRIAE_CS42_3DL_TGACv1_251713_AA0884060,TRIAE_CS42_3B_TGACv1_221609_AA0745810,TRIAE_CS42_1AL_TGACv1_000492_AA0013410,TRIAE_CS42_1AL_TGACv1_000755_AA0018450,TRIAE_CS42…
GO:0030137	COPI-coated vesicle	cellular_component	1.1539e-12	6.9257e-11	11	1928	29	74606	TRIAE_CS42_6DS_TGACv1_542583_AA1724790,TRIAE_CS42_4BL_TGACv1_321458_AA1060720,TRIAE_CS42_7AS_TGACv1_571321_AA1846800,TRIAE_CS42_7DS_TGACv1_623122_AA2049790,TRIAE_CS42_U_TGACv1_641043_AA2083140,TRIAE_CS42_1DL_TGACv1_061297_AA0191640,TRIAE_CS42_6AS_TGACv1_486272_AA1559050,TRIAE_CS42_1AL_TGACv1_001331_AA0028860,TRIAE_CS42_1BL_TGACv1_031076_AA0107250,TRIAE_CS42_6BS_TGACv1_514683_AA1663200,TRIAE_CS42_…
GO:0030663	COPI-coated vesicle membrane	cellular_component	1.1539e-12	6.9257e-11	11	1928	29	74606	TRIAE_CS42_6DS_TGACv1_542583_AA1724790,TRIAE_CS42_7AS_TGACv1_571321_AA1846800,TRIAE_CS42_4BL_TGACv1_321458_AA1060720,TRIAE_CS42_7DS_TGACv1_623122_AA2049790,TRIAE_CS42_U_TGACv1_641043_AA2083140,TRIAE_CS42_6AS_TGACv1_486272_AA1559050,TRIAE_CS42_1DL_TGACv1_061297_AA0191640,TRIAE_CS42_1AL_TGACv1_001331_AA0028860,TRIAE_CS42_1BL_TGACv1_031076_AA0107250,TRIAE_CS42_6BS_TGACv1_514683_AA1663200,TRIAE_CS42_…
GO:0044272	sulfur compound biosynthetic process	biological_process	1.1934e-12	7.0989e-11	26	1928	194	74606	TRIAE_CS42_4BL_TGACv1_320349_AA1036310,TRIAE_CS42_5BL_TGACv1_406279_AA1343630,TRIAE_CS42_7DS_TGACv1_624143_AA2059180,TRIAE_CS42_5DS_TGACv1_456564_AA1474130,TRIAE_CS42_1BL_TGACv1_030654_AA0097000,TRIAE_CS42_3DS_TGACv1_274021_AA0934410,TRIAE_CS42_5AL_TGACv1_376570_AA1238560,TRIAE_CS42_5AS_TGACv1_393328_AA1271350,TRIAE_CS42_4BS_TGACv1_330819_AA1108930,TRIAE_CS42_4AL_TGACv1_290117_AA0981910,TRIAE_CS4…
GO:0016192	vesicle-mediated transport	biological_process	1.2216e-12	7.2029e-11	51	1928	672	74606	TRIAE_CS42_6AS_TGACv1_486272_AA1559050,TRIAE_CS42_3B_TGACv1_222072_AA0756730,TRIAE_CS42_5DS_TGACv1_458693_AA1494370,TRIAE_CS42_7AS_TGACv1_571321_AA1846800,TRIAE_CS42_4BL_TGACv1_320261_AA1032800,TRIAE_CS42_2AS_TGACv1_113808_AA0360930,TRIAE_CS42_3DL_TGACv1_250339_AA0866430,TRIAE_CS42_4BS_TGACv1_328452_AA1088030,TRIAE_CS42_6DL_TGACv1_526657_AA1689120,TRIAE_CS42_2DL_TGACv1_158815_AA0526570,TRIAE_CS42…
GO:0046939	nucleotide phosphorylation	biological_process	1.3154e-12	7.6888e-11	29	1928	236	74606	TRIAE_CS42_1DS_TGACv1_081340_AA0260080,TRIAE_CS42_1DL_TGACv1_061176_AA0187850,TRIAE_CS42_U_TGACv1_642445_AA2117740,TRIAE_CS42_3AL_TGACv1_196429_AA0660330,TRIAE_CS42_5BS_TGACv1_424804_AA1391850,TRIAE_CS42_1BL_TGACv1_030377_AA0088540,TRIAE_CS42_1BL_TGACv1_030605_AA0095500,TRIAE_CS42_3AL_TGACv1_194635_AA0637160,TRIAE_CS42_5AS_TGACv1_394202_AA1278730,TRIAE_CS42_3DL_TGACv1_250475_AA0868810,TRIAE_CS42_…
GO:0000234	phosphoethanolamine N-methyltransferase activity	molecular_function	1.3672e-12	7.9225e-11	7	1928	7	74606	TRIAE_CS42_3DL_TGACv1_254806_AA0896680,TRIAE_CS42_1DL_TGACv1_062419_AA0214280,TRIAE_CS42_3AL_TGACv1_196405_AA0660080,TRIAE_CS42_1DL_TGACv1_063094_AA0223830,TRIAE_CS42_3B_TGACv1_221027_AA0727340,TRIAE_CS42_1BL_TGACv1_032207_AA0126810,TRIAE_CS42_1AL_TGACv1_000734_AA0018090
GO:0098796	membrane protein complex	cellular_component	1.5716e-12	9.0293e-11	67	1928	833	74606	TRIAE_CS42_1DL_TGACv1_062210_AA0210500,TRIAE_CS42_5AL_TGACv1_374122_AA1190950,TRIAE_CS42_5BL_TGACv1_404454_AA1300300,TRIAE_CS42_5DL_TGACv1_434747_AA1440970,TRIAE_CS42_6BS_TGACv1_514088_AA1654890,TRIAE_CS42_5BL_TGACv1_405597_AA1331170,TRIAE_CS42_1AL_TGACv1_009365_AA0055660,TRIAE_CS42_3DL_TGACv1_250864_AA0874390,TRIAE_CS42_3AL_TGACv1_194074_AA0625970,TRIAE_CS42_3AL_TGACv1_195562_AA0651220,TRIAE_CS4…
GO:0044724	single-organism carbohydrate catabolic process	biological_process	1.7648e-12	1.0054e-10	27	1928	218	74606	TRIAE_CS42_2AS_TGACv1_112739_AA0344340,TRIAE_CS42_4BS_TGACv1_330279_AA1106910,TRIAE_CS42_7AS_TGACv1_571836_AA1850200,TRIAE_CS42_7BS_TGACv1_592594_AA1941060,TRIAE_CS42_5AL_TGACv1_376570_AA1238560,TRIAE_CS42_1AL_TGACv1_000755_AA0018450,TRIAE_CS42_7AS_TGACv1_570780_AA1840810,TRIAE_CS42_5BS_TGACv1_423965_AA1385430,TRIAE_CS42_7DS_TGACv1_622764_AA2045010,TRIAE_CS42_5BL_TGACv1_406279_AA1343630,TRIAE_CS4…
GO:1901617	organic hydroxy compound biosynthetic process	biological_process	1.8821e-12	1.0632e-10	22	1928	135	74606	TRIAE_CS42_7DL_TGACv1_604116_AA1994020,TRIAE_CS42_5DL_TGACv1_434775_AA1441440,TRIAE_CS42_5AL_TGACv1_376140_AA1232710,TRIAE_CS42_3DL_TGACv1_254806_AA0896680,TRIAE_CS42_3B_TGACv1_222513_AA0766220,TRIAE_CS42_3AL_TGACv1_196405_AA0660080,TRIAE_CS42_4AL_TGACv1_288528_AA0951160,TRIAE_CS42_5AL_TGACv1_378173_AA1251720,TRIAE_CS42_3B_TGACv1_221027_AA0727340,TRIAE_CS42_7DL_TGACv1_603779_AA1989110,TRIAE_CS42_…
GO:0098588	bounding membrane of organelle	cellular_component	1.9864e-12	1.1127e-10	71	1928	1121	74606	TRIAE_CS42_5AL_TGACv1_374122_AA1190950,TRIAE_CS42_3B_TGACv1_223314_AA0780090,TRIAE_CS42_3DL_TGACv1_250864_AA0874390,TRIAE_CS42_2AL_TGACv1_096831_AA0321630,TRIAE_CS42_5BL_TGACv1_405597_AA1331170,TRIAE_CS42_U_TGACv1_641043_AA2083140,TRIAE_CS42_4AL_TGACv1_288747_AA0957130,TRIAE_CS42_4DL_TGACv1_342471_AA1114460,TRIAE_CS42_6DS_TGACv1_542583_AA1724790,TRIAE_CS42_2BL_TGACv1_131305_AA0425720,TRIAE_CS42_4…
GO:0005515	protein binding	molecular_function	2.2766e-12	1.2648e-10	503	1928	15736	74606	TRIAE_CS42_3B_TGACv1_220835_AA0720860,TRIAE_CS42_1DL_TGACv1_062308_AA0212250,TRIAE_CS42_7AL_TGACv1_556037_AA1753310,TRIAE_CS42_2AL_TGACv1_093051_AA0270470,TRIAE_CS42_6BL_TGACv1_500776_AA1609550,TRIAE_CS42_4BL_TGACv1_322527_AA1071800,TRIAE_CS42_5BL_TGACv1_405338_AA1325330,TRIAE_CS42_7AL_TGACv1_558570_AA1794420,TRIAE_CS42_6AS_TGACv1_486735_AA1564600,TRIAE_CS42_6BS_TGACv1_513638_AA1646430,TRIAE_CS42…
GO:0006163	purine nucleotide metabolic process	biological_process	2.7153e-12	1.4961e-10	42	1928	462	74606	TRIAE_CS42_3AL_TGACv1_194635_AA0637160,TRIAE_CS42_5BL_TGACv1_406155_AA1341460,TRIAE_CS42_1AL_TGACv1_004040_AA0052320,TRIAE_CS42_5DL_TGACv1_433836_AA1423410,TRIAE_CS42_7BL_TGACv1_579063_AA1903600,AIG90477,TRIAE_CS42_3AL_TGACv1_196429_AA0660330,TRIAE_CS42_5AL_TGACv1_374789_AA1209000,TRIAE_CS42_U_TGACv1_642445_AA2117740,TRIAE_CS42_1BL_TGACv1_030377_AA0088540,TRIAE_CS42_5DL_TGACv1_435540_AA1451810,TR…
GO:0009132	nucleoside diphosphate metabolic process	biological_process	3.4643e-12	1.8933e-10	26	1928	201	74606	TRIAE_CS42_7AS_TGACv1_571836_AA1850200,TRIAE_CS42_7BS_TGACv1_592594_AA1941060,TRIAE_CS42_5AL_TGACv1_376570_AA1238560,TRIAE_CS42_4BS_TGACv1_330279_AA1106910,TRIAE_CS42_2AS_TGACv1_112739_AA0344340,TRIAE_CS42_4DS_TGACv1_362522_AA1180350,TRIAE_CS42_6AL_TGACv1_471645_AA1512290,TRIAE_CS42_3DL_TGACv1_251713_AA0884060,TRIAE_CS42_3B_TGACv1_221609_AA0745810,TRIAE_CS42_7DS_TGACv1_622764_AA2045010,TRIAE_CS42…
GO:0006730	one-carbon metabolic process	biological_process	5.326e-12	2.8872e-10	15	1928	58	74606	TRIAE_CS42_3DS_TGACv1_274021_AA0934410,TRIAE_CS42_6DL_TGACv1_526382_AA1681340,TRIAE_CS42_3AS_TGACv1_213440_AA0706960,TRIAE_CS42_6AL_TGACv1_471945_AA1516140,TRIAE_CS42_6BL_TGACv1_500297_AA1602810,TRIAE_CS42_5AL_TGACv1_374680_AA1206310,TRIAE_CS42_6BL_TGACv1_499577_AA1586520,TRIAE_CS42_5BL_TGACv1_406345_AA1344380,TRIAE_CS42_2AL_TGACv1_094486_AA0298610,TRIAE_CS42_6AL_TGACv1_475648_AA1536640,TRIAE_CS4…
GO:0008172	S-methyltransferase activity	molecular_function	5.6626e-12	3.0423e-10	9	1928	15	74606	TRIAE_CS42_4BL_TGACv1_320349_AA1036310,TRIAE_CS42_5BS_TGACv1_423584_AA1379990,TRIAE_CS42_4AS_TGACv1_307275_AA1019080,TRIAE_CS42_5DS_TGACv1_456564_AA1474130,TRIAE_CS42_5AS_TGACv1_393328_AA1271350,TRIAE_CS42_4AL_TGACv1_290117_AA0981910,TRIAE_CS42_4BS_TGACv1_330819_AA1108930,TRIAE_CS42_4DS_TGACv1_361983_AA1175310,TRIAE_CS42_4DL_TGACv1_343385_AA1133850
GO:0009150	purine ribonucleotide metabolic process	biological_process	5.7026e-12	3.0423e-10	41	1928	452	74606	TRIAE_CS42_1DL_TGACv1_063573_AA0228750,TRIAE_CS42_2DL_TGACv1_158421_AA0518370,TRIAE_CS42_2AS_TGACv1_112739_AA0344340,TRIAE_CS42_7AS_TGACv1_570780_AA1840810,TRIAE_CS42_1AL_TGACv1_000755_AA0018450,TRIAE_CS42_6AL_TGACv1_471645_AA1512290,TRIAE_CS42_5BL_TGACv1_406279_AA1343630,TRIAE_CS42_6AL_TGACv1_473321_AA1530120,TRIAE_CS42_1DL_TGACv1_061176_AA0187850,TRIAE_CS42_1DS_TGACv1_081340_AA0260080,TRIAE_CS4…
GO:0030117	membrane coat	cellular_component	6.3361e-12	3.3274e-10	20	1928	132	74606	TRIAE_CS42_4BL_TGACv1_321458_AA1060720,TRIAE_CS42_7DS_TGACv1_623122_AA2049790,TRIAE_CS42_4DS_TGACv1_361471_AA1168550,TRIAE_CS42_1AL_TGACv1_001331_AA0028860,TRIAE_CS42_6BS_TGACv1_514683_AA1663200,TRIAE_CS42_1BL_TGACv1_031076_AA0107250,TRIAE_CS42_5AL_TGACv1_374774_AA1208800,TRIAE_CS42_6DS_TGACv1_542583_AA1724790,TRIAE_CS42_7AL_TGACv1_556695_AA1769100,TRIAE_CS42_4BL_TGACv1_320261_AA1032800,TRIAE_CS4…
GO:0048475	coated membrane	cellular_component	6.3361e-12	3.3274e-10	20	1928	132	74606	TRIAE_CS42_2DL_TGACv1_158815_AA0526570,TRIAE_CS42_4BS_TGACv1_328452_AA1088030,TRIAE_CS42_4DS_TGACv1_362497_AA1180110,TRIAE_CS42_2BL_TGACv1_131305_AA0425720,TRIAE_CS42_U_TGACv1_641043_AA2083140,TRIAE_CS42_7DL_TGACv1_602635_AA1963430,TRIAE_CS42_4AL_TGACv1_288747_AA0957130,TRIAE_CS42_6AS_TGACv1_486272_AA1559050,TRIAE_CS42_1DL_TGACv1_061297_AA0191640,TRIAE_CS42_6DS_TGACv1_542583_AA1724790,TRIAE_CS42_…
GO:2001070	starch binding	molecular_function	7.3357e-12	3.8225e-10	12	1928	38	74606	TRIAE_CS42_2AL_TGACv1_093876_AA0288560,TRIAE_CS42_3AL_TGACv1_193608_AA0614780,TRIAE_CS42_2DS_TGACv1_177436_AA0577070,TRIAE_CS42_4AS_TGACv1_306645_AA1011430,TRIAE_CS42_2BS_TGACv1_148740_AA0494910,TRIAE_CS42_2AS_TGACv1_112747_AA0344470,TRIAE_CS42_4DL_TGACv1_343659_AA1137850,TRIAE_CS42_5AL_TGACv1_374631_AA1204970,TRIAE_CS42_3B_TGACv1_220592_AA0710100,TRIAE_CS42_2DL_TGACv1_159587_AA0540290,TRIAE_CS42…
GO:1901566	organonitrogen compound biosynthetic process	biological_process	1.1487e-11	5.9399e-10	143	1928	2782	74606	TRIAE_CS42_7BL_TGACv1_577301_AA1871640,TRIAE_CS42_U_TGACv1_642463_AA2118090,TRIAE_CS42_1AL_TGACv1_000254_AA0007380,TRIAE_CS42_4AS_TGACv1_307275_AA1019080,TRIAE_CS42_7DS_TGACv1_622243_AA2036170,TRIAE_CS42_5AS_TGACv1_394381_AA1279900,TRIAE_CS42_2AL_TGACv1_094865_AA0304200,TRIAE_CS42_5DS_TGACv1_456564_AA1474130,TRIAE_CS42_2BS_TGACv1_146384_AA0464010,TRIAE_CS42_6DL_TGACv1_526952_AA1695860,TRIAE_CS42_…
GO:0044262	cellular carbohydrate metabolic process	biological_process	1.1782e-11	6.0455e-10	48	1928	703	74606	TRIAE_CS42_4BL_TGACv1_320480_AA1040880,TRIAE_CS42_2BL_TGACv1_131119_AA0422830,TRIAE_CS42_2AS_TGACv1_116387_AA0373890,TRIAE_CS42_2DS_TGACv1_180213_AA0610440,TRIAE_CS42_2BS_TGACv1_147826_AA0487990,TRIAE_CS42_4AL_TGACv1_288528_AA0951160,TRIAE_CS42_1AL_TGACv1_000384_AA0010710,TRIAE_CS42_4AL_TGACv1_289959_AA0979560,TRIAE_CS42_4BS_TGACv1_328010_AA1080930,TRIAE_CS42_7DL_TGACv1_603134_AA1976600,TRIAE_CS4…
GO:0009117	nucleotide metabolic process	biological_process	1.4222e-11	7.2425e-10	51	1928	681	74606	TRIAE_CS42_7DS_TGACv1_622764_AA2045010,TRIAE_CS42_5BS_TGACv1_423965_AA1385430,TRIAE_CS42_1DL_TGACv1_063603_AA0229020,TRIAE_CS42_6DL_TGACv1_526952_AA1695860,TRIAE_CS42_4DS_TGACv1_362522_AA1180350,TRIAE_CS42_3DL_TGACv1_251713_AA0884060,TRIAE_CS42_3B_TGACv1_221609_AA0745810,TRIAE_CS42_1AL_TGACv1_000492_AA0013410,TRIAE_CS42_4AL_TGACv1_288659_AA0954680,TRIAE_CS42_6BS_TGACv1_514088_AA1654890,TRIAE_CS42…
GO:0051179	localization	biological_process	1.7434e-11	8.7845e-10	211	1928	5398	74606	TRIAE_CS42_1DL_TGACv1_062210_AA0210500,TRIAE_CS42_5AL_TGACv1_375095_AA1216020,TRIAE_CS42_6BL_TGACv1_500073_AA1598240,TRIAE_CS42_3AL_TGACv1_194328_AA0631110,TRIAE_CS42_7BS_TGACv1_591976_AA1927160,TRIAE_CS42_7BS_TGACv1_593531_AA1952260,TRIAE_CS42_5BL_TGACv1_405597_AA1331170,TRIAE_CS42_3DS_TGACv1_272293_AA0918520,TRIAE_CS42_6BS_TGACv1_514088_AA1654890,TRIAE_CS42_2AL_TGACv1_096831_AA0321630,TRIAE_CS4…
GO:0006810	transport	biological_process	1.7511e-11	8.7845e-10	208	1928	5299	74606	TRIAE_CS42_5BL_TGACv1_405960_AA1338260,TRIAE_CS42_1BL_TGACv1_033087_AA0136910,TRIAE_CS42_3DL_TGACv1_250339_AA0866430,TRIAE_CS42_2DL_TGACv1_159649_AA0541000,TRIAE_CS42_1DL_TGACv1_062176_AA0210030,TRIAE_CS42_2DL_TGACv1_158910_AA0528600,TRIAE_CS42_6DL_TGACv1_526657_AA1689120,TRIAE_CS42_3DL_TGACv1_250717_AA0872310,TRIAE_CS42_4BS_TGACv1_329163_AA1098380,TRIAE_CS42_4BL_TGACv1_320261_AA1032800,TRIAE_CS4…
GO:0009199	ribonucleoside triphosphate metabolic process	biological_process	1.8613e-11	9.2681e-10	36	1928	365	74606	TRIAE_CS42_5DL_TGACv1_433836_AA1423410,TRIAE_CS42_1AL_TGACv1_004040_AA0052320,TRIAE_CS42_3B_TGACv1_223258_AA0779170,TRIAE_CS42_3AL_TGACv1_194635_AA0637160,TRIAE_CS42_1BL_TGACv1_030377_AA0088540,TRIAE_CS42_3AL_TGACv1_196429_AA0660330,TRIAE_CS42_7BL_TGACv1_579063_AA1903600,AIG90477,TRIAE_CS42_1AL_TGACv1_000492_AA0013410,TRIAE_CS42_6BS_TGACv1_514088_AA1654890,TRIAE_CS42_7DS_TGACv1_622764_AA2045010,T…
GO:0051234	establishment of localization	biological_process	2.0205e-11	9.9864e-10	209	1928	5343	74606	TRIAE_CS42_3B_TGACv1_221849_AA0751620,TRIAE_CS42_3DS_TGACv1_272355_AA0919480,TRIAE_CS42_1BL_TGACv1_030350_AA0087730,TRIAE_CS42_5AL_TGACv1_374188_AA1192880,TRIAE_CS42_7BL_TGACv1_577333_AA1872500,TRIAE_CS42_3B_TGACv1_222757_AA0770040,TRIAE_CS42_7DS_TGACv1_623153_AA2050180,TRIAE_CS42_2DL_TGACv1_160210_AA0548190,TRIAE_CS42_5DL_TGACv1_432946_AA1395680,TRIAE_CS42_3AL_TGACv1_193952_AA0623370,TRIAE_CS42_…
GO:0009064	glutamine family amino acid metabolic process	biological_process	2.5264e-11	1.2396e-09	20	1928	134	74606	TRIAE_CS42_5BL_TGACv1_404165_AA1287780,TRIAE_CS42_3DS_TGACv1_272233_AA0917470,TRIAE_CS42_4DL_TGACv1_343985_AA1142210,TRIAE_CS42_2DS_TGACv1_177239_AA0570170,TRIAE_CS42_1AL_TGACv1_000254_AA0007370,TRIAE_CS42_3B_TGACv1_222610_AA0767770,TRIAE_CS42_6BL_TGACv1_500652_AA1608010,TRIAE_CS42_4AS_TGACv1_307728_AA1023060,TRIAE_CS42_5DL_TGACv1_434775_AA1441440,TRIAE_CS42_U_TGACv1_654540_AA2150720,TRIAE_CS42_6…
GO:0006753	nucleoside phosphate metabolic process	biological_process	2.7048e-11	1.3175e-09	51	1928	690	74606	TRIAE_CS42_1BL_TGACv1_030605_AA0095500,TRIAE_CS42_1AL_TGACv1_000512_AA0013610,TRIAE_CS42_6BL_TGACv1_499360_AA1579440,TRIAE_CS42_5AS_TGACv1_394202_AA1278730,TRIAE_CS42_3DL_TGACv1_250475_AA0868810,TRIAE_CS42_7DS_TGACv1_624347_AA2060690,TRIAE_CS42_3AL_TGACv1_194109_AA0626660,TRIAE_CS42_5DS_TGACv1_457334_AA1485300,TRIAE_CS42_1BL_TGACv1_031692_AA0118950,TRIAE_CS42_1DS_TGACv1_081340_AA0260080,TRIAE_CS4…
GO:0031090	organelle membrane	cellular_component	2.7479e-11	1.3289e-09	84	1928	1452	74606	TRIAE_CS42_4DS_TGACv1_362497_AA1180110,TRIAE_CS42_3AS_TGACv1_210945_AA0681910,TRIAE_CS42_4BS_TGACv1_328586_AA1090550,TRIAE_CS42_U_TGACv1_642388_AA2116800,TRIAE_CS42_6BL_TGACv1_501539_AA1618480,TRIAE_CS42_7AS_TGACv1_571321_AA1846800,TRIAE_CS42_3DS_TGACv1_272832_AA0925630,TRIAE_CS42_1DL_TGACv1_062835_AA0220660,TRIAE_CS42_6AL_TGACv1_471165_AA1503930,TRIAE_CS42_3B_TGACv1_222072_AA0756730,TRIAE_CS42_U…
GO:0003871	5-methyltetrahydropteroyltriglutamate-homocysteine S-methyltransferase activity	molecular_function	2.9075e-11	1.3861e-09	6	1928	6	74606	TRIAE_CS42_5DS_TGACv1_456564_AA1474130,TRIAE_CS42_5AS_TGACv1_393328_AA1271350,TRIAE_CS42_4DS_TGACv1_361983_AA1175310,TRIAE_CS42_4BS_TGACv1_330819_AA1108930,TRIAE_CS42_4AL_TGACv1_290117_AA0981910,TRIAE_CS42_5BS_TGACv1_423584_AA1379990
GO:0042085	5-methyltetrahydropteroyltri-L-glutamate-dependent methyltransferase activity	molecular_function	2.9075e-11	1.3861e-09	6	1928	6	74606	TRIAE_CS42_5DS_TGACv1_456564_AA1474130,TRIAE_CS42_4AL_TGACv1_290117_AA0981910,TRIAE_CS42_4BS_TGACv1_330819_AA1108930,TRIAE_CS42_5BS_TGACv1_423584_AA1379990,TRIAE_CS42_4DS_TGACv1_361983_AA1175310,TRIAE_CS42_5AS_TGACv1_393328_AA1271350
GO:0006096	glycolytic process	biological_process	3.4584e-11	1.6144e-09	23	1928	178	74606	TRIAE_CS42_5AL_TGACv1_376570_AA1238560,TRIAE_CS42_7BS_TGACv1_592594_AA1941060,TRIAE_CS42_7AS_TGACv1_571836_AA1850200,TRIAE_CS42_2AS_TGACv1_112739_AA0344340,TRIAE_CS42_4BS_TGACv1_330279_AA1106910,TRIAE_CS42_7AS_TGACv1_570780_AA1840810,TRIAE_CS42_1AL_TGACv1_000755_AA0018450,TRIAE_CS42_3B_TGACv1_221609_AA0745810,TRIAE_CS42_6AL_TGACv1_471645_AA1512290,TRIAE_CS42_4DS_TGACv1_362522_AA1180350,TRIAE_CS42…
GO:0006757	ATP generation from ADP	biological_process	3.4584e-11	1.6144e-09	23	1928	178	74606	TRIAE_CS42_3AL_TGACv1_194635_AA0637160,TRIAE_CS42_1BL_TGACv1_030605_AA0095500,TRIAE_CS42_5DS_TGACv1_457334_AA1485300,TRIAE_CS42_5DL_TGACv1_433836_AA1423410,TRIAE_CS42_5AS_TGACv1_394202_AA1278730,TRIAE_CS42_3DL_TGACv1_250475_AA0868810,TRIAE_CS42_1DS_TGACv1_081340_AA0260080,TRIAE_CS42_3AL_TGACv1_196429_AA0660330,TRIAE_CS42_7DS_TGACv1_622764_AA2045010,TRIAE_CS42_5BS_TGACv1_423965_AA1385430,TRIAE_CS4…
GO:0046031	ADP metabolic process	biological_process	3.4584e-11	1.6144e-09	23	1928	178	74606	TRIAE_CS42_5DL_TGACv1_433836_AA1423410,TRIAE_CS42_5DS_TGACv1_457334_AA1485300,TRIAE_CS42_3DL_TGACv1_250475_AA0868810,TRIAE_CS42_5AS_TGACv1_394202_AA1278730,TRIAE_CS42_3AL_TGACv1_194635_AA0637160,TRIAE_CS42_1BL_TGACv1_030605_AA0095500,TRIAE_CS42_3AL_TGACv1_196429_AA0660330,TRIAE_CS42_1DS_TGACv1_081340_AA0260080,TRIAE_CS42_1AL_TGACv1_000755_AA0018450,TRIAE_CS42_7AS_TGACv1_570780_AA1840810,TRIAE_CS4…
GO:0072522	purine-containing compound biosynthetic process	biological_process	3.6934e-11	1.7122e-09	27	1928	218	74606	TRIAE_CS42_1AL_TGACv1_000492_AA0013410,TRIAE_CS42_6AL_TGACv1_473321_AA1530120,TRIAE_CS42_6DL_TGACv1_526952_AA1695860,TRIAE_CS42_1DL_TGACv1_063573_AA0228750,TRIAE_CS42_6BL_TGACv1_499716_AA1589820,TRIAE_CS42_1DL_TGACv1_062210_AA0210500,TRIAE_CS42_2DL_TGACv1_158421_AA0518370,TRIAE_CS42_6AL_TGACv1_472192_AA1519000,TRIAE_CS42_3DS_TGACv1_274021_AA0934410,TRIAE_CS42_3B_TGACv1_223441_AA0782230,TRIAE_CS42…
GO:0009163	nucleoside biosynthetic process	biological_process	5.8001e-11	2.6523e-09	25	1928	189	74606	TRIAE_CS42_3AS_TGACv1_213440_AA0706960,TRIAE_CS42_6BL_TGACv1_500297_AA1602810,TRIAE_CS42_3B_TGACv1_223441_AA0782230,TRIAE_CS42_3DS_TGACv1_274021_AA0934410,TRIAE_CS42_1DL_TGACv1_062210_AA0210500,TRIAE_CS42_2DL_TGACv1_158421_AA0518370,TRIAE_CS42_6AL_TGACv1_473321_AA1530120,TRIAE_CS42_6DL_TGACv1_526952_AA1695860,TRIAE_CS42_1AL_TGACv1_000492_AA0013410,TRIAE_CS42_3DL_TGACv1_249279_AA0843940,TRIAE_CS42…
GO:0042455	ribonucleoside biosynthetic process	biological_process	5.8001e-11	2.6523e-09	25	1928	189	74606	TRIAE_CS42_6AL_TGACv1_473321_AA1530120,TRIAE_CS42_6DL_TGACv1_526952_AA1695860,TRIAE_CS42_1AL_TGACv1_000492_AA0013410,TRIAE_CS42_3DS_TGACv1_274021_AA0934410,TRIAE_CS42_3AS_TGACv1_213440_AA0706960,TRIAE_CS42_3B_TGACv1_223441_AA0782230,TRIAE_CS42_6BL_TGACv1_500297_AA1602810,TRIAE_CS42_1DL_TGACv1_062210_AA0210500,TRIAE_CS42_2DL_TGACv1_158421_AA0518370,TRIAE_CS42_5BL_TGACv1_406155_AA1341460,TRIAE_CS42…
GO:0009522	photosystem I	cellular_component	6.1222e-11	2.7806e-09	23	1928	127	74606	TRIAE_CS42_7BS_TGACv1_592029_AA1928680,TRIAE_CS42_1AL_TGACv1_000383_AA0010660,TRIAE_CS42_6BS_TGACv1_514827_AA1664770,TRIAE_CS42_1AL_TGACv1_009365_AA0055660,TRIAE_CS42_1DL_TGACv1_061593_AA0199400,TRIAE_CS42_6AS_TGACv1_485824_AA1552840,TRIAE_CS42_7AS_TGACv1_569064_AA1806110,TRIAE_CS42_5DL_TGACv1_434747_AA1440970,TRIAE_CS42_5BL_TGACv1_404454_AA1300300,TRIAE_CS42_6AS_TGACv1_485824_AA1552830,TRIAE_CS4…
GO:0009135	purine nucleoside diphosphate metabolic process	biological_process	7.1239e-11	3.1713e-09	23	1928	184	74606	TRIAE_CS42_3AL_TGACv1_194635_AA0637160,TRIAE_CS42_1BL_TGACv1_030605_AA0095500,TRIAE_CS42_5AS_TGACv1_394202_AA1278730,TRIAE_CS42_3DL_TGACv1_250475_AA0868810,TRIAE_CS42_5DS_TGACv1_457334_AA1485300,TRIAE_CS42_5DL_TGACv1_433836_AA1423410,TRIAE_CS42_1DS_TGACv1_081340_AA0260080,TRIAE_CS42_3AL_TGACv1_196429_AA0660330,TRIAE_CS42_4DS_TGACv1_362522_AA1180350,TRIAE_CS42_6AL_TGACv1_471645_AA1512290,TRIAE_CS4…
GO:0009179	purine ribonucleoside diphosphate metabolic process	biological_process	7.1239e-11	3.1713e-09	23	1928	184	74606	TRIAE_CS42_3AL_TGACv1_196429_AA0660330,TRIAE_CS42_1DS_TGACv1_081340_AA0260080,TRIAE_CS42_5AS_TGACv1_394202_AA1278730,TRIAE_CS42_3DL_TGACv1_250475_AA0868810,TRIAE_CS42_5DS_TGACv1_457334_AA1485300,TRIAE_CS42_5DL_TGACv1_433836_AA1423410,TRIAE_CS42_3AL_TGACv1_194635_AA0637160,TRIAE_CS42_1BL_TGACv1_030605_AA0095500,TRIAE_CS42_5AL_TGACv1_376570_AA1238560,TRIAE_CS42_7BS_TGACv1_592594_AA1941060,TRIAE_CS4…
GO:0009185	ribonucleoside diphosphate metabolic process	biological_process	7.1239e-11	3.1713e-09	23	1928	184	74606	TRIAE_CS42_5DS_TGACv1_457334_AA1485300,TRIAE_CS42_5DL_TGACv1_433836_AA1423410,TRIAE_CS42_5AS_TGACv1_394202_AA1278730,TRIAE_CS42_3DL_TGACv1_250475_AA0868810,TRIAE_CS42_3AL_TGACv1_194635_AA0637160,TRIAE_CS42_1BL_TGACv1_030605_AA0095500,TRIAE_CS42_3AL_TGACv1_196429_AA0660330,TRIAE_CS42_1DS_TGACv1_081340_AA0260080,TRIAE_CS42_1AL_TGACv1_000755_AA0018450,TRIAE_CS42_7AS_TGACv1_570780_AA1840810,TRIAE_CS4…
GO:0009141	nucleoside triphosphate metabolic process	biological_process	8.894e-11	3.9333e-09	36	1928	380	74606	TRIAE_CS42_3AL_TGACv1_194635_AA0637160,TRIAE_CS42_3B_TGACv1_223258_AA0779170,TRIAE_CS42_1AL_TGACv1_004040_AA0052320,TRIAE_CS42_5DL_TGACv1_433836_AA1423410,TRIAE_CS42_7BL_TGACv1_579063_AA1903600,AIG90477,TRIAE_CS42_3AL_TGACv1_196429_AA0660330,TRIAE_CS42_1BL_TGACv1_030377_AA0088540,TRIAE_CS42_4DS_TGACv1_362522_AA1180350,TRIAE_CS42_3DL_TGACv1_251713_AA0884060,TRIAE_CS42_3B_TGACv1_221609_AA0745810,TR…
GO:1901659	glycosyl compound biosynthetic process	biological_process	1.2082e-10	5.308e-09	25	1928	195	74606	TRIAE_CS42_1AL_TGACv1_000492_AA0013410,TRIAE_CS42_6DL_TGACv1_526952_AA1695860,TRIAE_CS42_6AL_TGACv1_473321_AA1530120,TRIAE_CS42_1DL_TGACv1_062210_AA0210500,TRIAE_CS42_2DL_TGACv1_158421_AA0518370,TRIAE_CS42_6BL_TGACv1_500297_AA1602810,TRIAE_CS42_3AS_TGACv1_213440_AA0706960,TRIAE_CS42_3B_TGACv1_223441_AA0782230,TRIAE_CS42_3DS_TGACv1_274021_AA0934410,TRIAE_CS42_5AL_TGACv1_375327_AA1219960,TRIAE_CS42…
GO:0004478	methionine adenosyltransferase activity	molecular_function	1.3143e-10	5.6999e-09	8	1928	13	74606	TRIAE_CS42_6AL_TGACv1_475648_AA1536640,TRIAE_CS42_6BL_TGACv1_500297_AA1602810,TRIAE_CS42_3B_TGACv1_223441_AA0782230,TRIAE_CS42_6AL_TGACv1_471945_AA1516140,TRIAE_CS42_3AS_TGACv1_213440_AA0706960,TRIAE_CS42_3DS_TGACv1_274021_AA0934410,TRIAE_CS42_6DL_TGACv1_526382_AA1681340,TRIAE_CS42_6BL_TGACv1_499577_AA1586520
GO:0006556	S-adenosylmethionine biosynthetic process	biological_process	1.3143e-10	5.6999e-09	8	1928	13	74606	TRIAE_CS42_3B_TGACv1_223441_AA0782230,TRIAE_CS42_3AS_TGACv1_213440_AA0706960,TRIAE_CS42_6BL_TGACv1_500297_AA1602810,TRIAE_CS42_6AL_TGACv1_471945_AA1516140,TRIAE_CS42_3DS_TGACv1_274021_AA0934410,TRIAE_CS42_6DL_TGACv1_526382_AA1681340,TRIAE_CS42_6BL_TGACv1_499577_AA1586520,TRIAE_CS42_6AL_TGACv1_475648_AA1536640
GO:0017111	nucleoside-triphosphatase activity	molecular_function	1.5367e-10	6.6214e-09	81	1928	1777	74606	TRIAE_CS42_3AL_TGACv1_194964_AA0642840,TRIAE_CS42_7DS_TGACv1_622168_AA2034390,TRIAE_CS42_2DS_TGACv1_177177_AA0568030,TRIAE_CS42_3B_TGACv1_222072_AA0756730,TRIAE_CS42_4AL_TGACv1_288269_AA0942920,TRIAE_CS42_3AS_TGACv1_210890_AA0680890,TRIAE_CS42_1DL_TGACv1_062495_AA0215330,TRIAE_CS42_4DS_TGACv1_361934_AA1174490,TRIAE_CS42_3DS_TGACv1_273334_AA0930440,TRIAE_CS42_3DL_TGACv1_249892_AA0858230,TRIAE_CS42…
GO:0022804	active transmembrane transporter activity	molecular_function	2.4412e-10	1.0452e-08	49	1928	837	74606	TRIAE_CS42_2BL_TGACv1_129391_AA0381430,TRIAE_CS42_3AS_TGACv1_210574_AA0675360,TRIAE_CS42_1AL_TGACv1_004040_AA0052320,TRIAE_CS42_3AS_TGACv1_211205_AA0686630,TRIAE_CS42_7BL_TGACv1_576793_AA1855160,TRIAE_CS42_4DS_TGACv1_361391_AA1166860,TRIAE_CS42_7DL_TGACv1_603585_AA1986010,TRIAE_CS42_3AS_TGACv1_210799_AA0679360,TRIAE_CS42_2DL_TGACv1_159040_AA0531140,TRIAE_CS42_3DL_TGACv1_250186_AA0863800,TRIAE_CS4…
GO:0005975	carbohydrate metabolic process	biological_process	2.7902e-10	1.1871e-08	123	1928	2928	74606	TRIAE_CS42_3DL_TGACv1_250743_AA0872580,TRIAE_CS42_7DL_TGACv1_602694_AA1965500,TRIAE_CS42_2AL_TGACv1_093044_AA0270150,TRIAE_CS42_1DS_TGACv1_081340_AA0260080,TRIAE_CS42_2AL_TGACv1_094970_AA0305380,TRIAE_CS42_5AS_TGACv1_394202_AA1278730,TRIAE_CS42_6DL_TGACv1_527365_AA1702830,TRIAE_CS42_7DS_TGACv1_624347_AA2060690,TRIAE_CS42_3AL_TGACv1_198344_AA0668440,TRIAE_CS42_5DL_TGACv1_438060_AA1467880,TRIAE_CS4…
GO:0009144	purine nucleoside triphosphate metabolic process	biological_process	3.1587e-10	1.3191e-08	33	1928	343	74606	TRIAE_CS42_7AS_TGACv1_570780_AA1840810,TRIAE_CS42_1AL_TGACv1_000755_AA0018450,TRIAE_CS42_6AL_TGACv1_471645_AA1512290,TRIAE_CS42_5BL_TGACv1_406279_AA1343630,TRIAE_CS42_2DL_TGACv1_158421_AA0518370,TRIAE_CS42_2AS_TGACv1_112739_AA0344340,TRIAE_CS42_3DL_TGACv1_250475_AA0868810,TRIAE_CS42_5AS_TGACv1_394202_AA1278730,TRIAE_CS42_1BL_TGACv1_031692_AA0118950,TRIAE_CS42_5DS_TGACv1_457334_AA1485300,TRIAE_CS4…
GO:0009205	purine ribonucleoside triphosphate metabolic process	biological_process	3.1587e-10	1.3191e-08	33	1928	343	74606	TRIAE_CS42_2DL_TGACv1_158421_AA0518370,TRIAE_CS42_2AS_TGACv1_112739_AA0344340,TRIAE_CS42_1AL_TGACv1_000755_AA0018450,TRIAE_CS42_7AS_TGACv1_570780_AA1840810,TRIAE_CS42_5BL_TGACv1_406279_AA1343630,TRIAE_CS42_6AL_TGACv1_471645_AA1512290,TRIAE_CS42_1DL_TGACv1_061176_AA0187850,TRIAE_CS42_1DS_TGACv1_081340_AA0260080,TRIAE_CS42_5DS_TGACv1_457334_AA1485300,TRIAE_CS42_1BL_TGACv1_031692_AA0118950,TRIAE_CS4…
GO:0006555	methionine metabolic process	biological_process	3.1594e-10	1.3191e-08	12	1928	43	74606	TRIAE_CS42_5AL_TGACv1_374680_AA1206310,TRIAE_CS42_4DL_TGACv1_343385_AA1133850,TRIAE_CS42_5BL_TGACv1_406345_AA1344380,TRIAE_CS42_5AS_TGACv1_393328_AA1271350,TRIAE_CS42_4DS_TGACv1_361983_AA1175310,TRIAE_CS42_4BS_TGACv1_330819_AA1108930,TRIAE_CS42_4AL_TGACv1_290117_AA0981910,TRIAE_CS42_5DS_TGACv1_456564_AA1474130,TRIAE_CS42_4AS_TGACv1_307275_AA1019080,TRIAE_CS42_7DS_TGACv1_624143_AA2059180,TRIAE_CS4…
GO:0009126	purine nucleoside monophosphate metabolic process	biological_process	3.2313e-10	1.3326e-08	35	1928	393	74606	TRIAE_CS42_1BL_TGACv1_031692_AA0118950,TRIAE_CS42_5DS_TGACv1_457334_AA1485300,TRIAE_CS42_5AS_TGACv1_394202_AA1278730,TRIAE_CS42_3DL_TGACv1_250475_AA0868810,TRIAE_CS42_6BL_TGACv1_499360_AA1579440,TRIAE_CS42_1AL_TGACv1_000512_AA0013610,TRIAE_CS42_1BL_TGACv1_030605_AA0095500,TRIAE_CS42_1DS_TGACv1_081340_AA0260080,TRIAE_CS42_1AL_TGACv1_000755_AA0018450,TRIAE_CS42_7AS_TGACv1_570780_AA1840810,TRIAE_CS4…
GO:0009167	purine ribonucleoside monophosphate metabolic process	biological_process	3.2313e-10	1.3326e-08	35	1928	393	74606	TRIAE_CS42_3AL_TGACv1_196429_AA0660330,TRIAE_CS42_7BL_TGACv1_579063_AA1903600,AIG90477,TRIAE_CS42_1AL_TGACv1_004040_AA0052320,TRIAE_CS42_5DL_TGACv1_433836_AA1423410,TRIAE_CS42_3AL_TGACv1_194635_AA0637160,TRIAE_CS42_1DL_TGACv1_062210_AA0210500,TRIAE_CS42_5AL_TGACv1_376570_AA1238560,TRIAE_CS42_7AS_TGACv1_571836_AA1850200,TRIAE_CS42_7BS_TGACv1_592594_AA1941060,TRIAE_CS42_4BS_TGACv1_330279_AA1106910,…
GO:0016903	oxidoreductase activity, acting on the aldehyde or oxo group of donors	molecular_function	3.9692e-10	1.6269e-08	22	1928	181	74606	TRIAE_CS42_1DS_TGACv1_082196_AA0264140,TRIAE_CS42_3AL_TGACv1_194620_AA0636860,TRIAE_CS42_5BL_TGACv1_406279_AA1343630,TRIAE_CS42_7DL_TGACv1_604354_AA1997220,TRIAE_CS42_2DL_TGACv1_158598_AA0522880,TRIAE_CS42_U_TGACv1_645225_AA2143600,TRIAE_CS42_6BS_TGACv1_515835_AA1672680,TRIAE_CS42_4BS_TGACv1_327871_AA1077160,TRIAE_CS42_1AL_TGACv1_000254_AA0007370,TRIAE_CS42_5AL_TGACv1_376570_AA1238560,TRIAE_CS42_…
GO:0044255	cellular lipid metabolic process	biological_process	5.9401e-10	2.42e-08	61	1928	1115	74606	TRIAE_CS42_4DS_TGACv1_361391_AA1166860,TRIAE_CS42_2BL_TGACv1_129465_AA0384880,TRIAE_CS42_1AL_TGACv1_000132_AA0004290,TRIAE_CS42_4AL_TGACv1_288528_AA0951160,TRIAE_CS42_1AL_TGACv1_002642_AA0044130,TRIAE_CS42_5BL_TGACv1_404481_AA1301440,TRIAE_CS42_7DS_TGACv1_622381_AA2038650,TRIAE_CS42_1DL_TGACv1_061125_AA0186220,TRIAE_CS42_U_TGACv1_643776_AA2134960,TRIAE_CS42_7BS_TGACv1_591992_AA1927520,TRIAE_CS42_…
GO:0030170	pyridoxal phosphate binding	molecular_function	7.6048e-10	3.0795e-08	27	1928	287	74606	TRIAE_CS42_2DL_TGACv1_159916_AA0544360,TRIAE_CS42_2BL_TGACv1_129567_AA0388870,TRIAE_CS42_3AS_TGACv1_211026_AA0683390,TRIAE_CS42_6AS_TGACv1_486551_AA1562560,TRIAE_CS42_4DL_TGACv1_343257_AA1132320,TRIAE_CS42_1BL_TGACv1_031332_AA0111790,TRIAE_CS42_6DS_TGACv1_543240_AA1737380,TRIAE_CS42_6BS_TGACv1_514473_AA1660220,TRIAE_CS42_5BL_TGACv1_404916_AA1315030,TRIAE_CS42_3AS_TGACv1_210886_AA0680800,TRIAE_CS4…
GO:0046496	nicotinamide nucleotide metabolic process	biological_process	7.9538e-10	3.2015e-08	27	1928	280	74606	TRIAE_CS42_1BL_TGACv1_030605_AA0095500,TRIAE_CS42_3AL_TGACv1_194635_AA0637160,TRIAE_CS42_7DS_TGACv1_624347_AA2060690,TRIAE_CS42_3DL_TGACv1_250475_AA0868810,TRIAE_CS42_5AS_TGACv1_394202_AA1278730,TRIAE_CS42_5DS_TGACv1_457334_AA1485300,TRIAE_CS42_5DL_TGACv1_433836_AA1423410,TRIAE_CS42_1DS_TGACv1_081340_AA0260080,TRIAE_CS42_2AL_TGACv1_094970_AA0305380,TRIAE_CS42_6AL_TGACv1_473639_AA1532140,TRIAE_CS4…
GO:0008610	lipid biosynthetic process	biological_process	8.5928e-10	3.4381e-08	53	1928	876	74606	TRIAE_CS42_7BS_TGACv1_591893_AA1924780,TRIAE_CS42_4AS_TGACv1_308060_AA1025550,TRIAE_CS42_2DS_TGACv1_179608_AA0608200,TRIAE_CS42_2AL_TGACv1_093558_AA0282560,TRIAE_CS42_1AL_TGACv1_000734_AA0018090,TRIAE_CS42_2BL_TGACv1_129564_AA0388780,TRIAE_CS42_7DS_TGACv1_623117_AA2049760,TRIAE_CS42_5DL_TGACv1_432935_AA1395050,TRIAE_CS42_3B_TGACv1_220873_AA0722080,TRIAE_CS42_2BS_TGACv1_146926_AA0475500,TRIAE_CS42…
GO:0030120	vesicle coat	cellular_component	8.837e-10	3.5149e-08	14	1928	79	74606	TRIAE_CS42_7DL_TGACv1_602635_AA1963430,TRIAE_CS42_4AL_TGACv1_288747_AA0957130,TRIAE_CS42_1DL_TGACv1_061297_AA0191640,TRIAE_CS42_7AL_TGACv1_556695_AA1769100,TRIAE_CS42_4BL_TGACv1_320261_AA1032800,TRIAE_CS42_4BL_TGACv1_321458_AA1060720,TRIAE_CS42_1BL_TGACv1_031076_AA0107250,TRIAE_CS42_2DL_TGACv1_158815_AA0526570,TRIAE_CS42_4BS_TGACv1_328452_AA1088030,TRIAE_CS42_5AL_TGACv1_374774_AA1208800,TRIAE_CS4…
GO:0042451	purine nucleoside biosynthetic process	biological_process	9.1163e-10	3.5836e-08	22	1928	161	74606	TRIAE_CS42_1DL_TGACv1_062210_AA0210500,TRIAE_CS42_2DL_TGACv1_158421_AA0518370,TRIAE_CS42_6BL_TGACv1_500297_AA1602810,TRIAE_CS42_3AS_TGACv1_213440_AA0706960,TRIAE_CS42_3B_TGACv1_223441_AA0782230,TRIAE_CS42_3DS_TGACv1_274021_AA0934410,TRIAE_CS42_1AL_TGACv1_000492_AA0013410,TRIAE_CS42_6DL_TGACv1_526952_AA1695860,TRIAE_CS42_6AL_TGACv1_473321_AA1530120,TRIAE_CS42_1BL_TGACv1_030377_AA0088540,TRIAE_CS42…
GO:0046129	purine ribonucleoside biosynthetic process	biological_process	9.1163e-10	3.5836e-08	22	1928	161	74606	TRIAE_CS42_6AL_TGACv1_475648_AA1536640,TRIAE_CS42_5BL_TGACv1_406155_AA1341460,TRIAE_CS42_6BL_TGACv1_499360_AA1579440,TRIAE_CS42_1AL_TGACv1_004040_AA0052320,TRIAE_CS42_5AL_TGACv1_375327_AA1219960,TRIAE_CS42_1BL_TGACv1_031692_AA0118950,TRIAE_CS42_6DL_TGACv1_526382_AA1681340,TRIAE_CS42_6AL_TGACv1_471945_AA1516140,TRIAE_CS42_5AL_TGACv1_374789_AA1209000,TRIAE_CS42_6BL_TGACv1_499577_AA1586520,TRIAE_CS4…
GO:0016620	oxidoreductase activity, acting on the aldehyde or oxo group of donors, NAD or NADP as acceptor	molecular_function	9.2431e-10	3.6123e-08	20	1928	156	74606	TRIAE_CS42_5BL_TGACv1_405004_AA1317680,TRIAE_CS42_6DL_TGACv1_526670_AA1689480,TRIAE_CS42_7AL_TGACv1_556078_AA1754810,TRIAE_CS42_U_TGACv1_642531_AA2119080,TRIAE_CS42_3B_TGACv1_225182_AA0805900,TRIAE_CS42_3DL_TGACv1_250063_AA0861520,TRIAE_CS42_2BL_TGACv1_130904_AA0419740,TRIAE_CS42_6AS_TGACv1_487743_AA1572700,TRIAE_CS42_7DL_TGACv1_605845_AA2008250,TRIAE_CS42_3B_TGACv1_221981_AA0754380,TRIAE_CS42_6D…
GO:0009161	ribonucleoside monophosphate metabolic process	biological_process	1.0518e-09	4.0796e-08	35	1928	414	74606	TRIAE_CS42_1BL_TGACv1_031692_AA0118950,TRIAE_CS42_5DS_TGACv1_457334_AA1485300,TRIAE_CS42_5AS_TGACv1_394202_AA1278730,TRIAE_CS42_3DL_TGACv1_250475_AA0868810,TRIAE_CS42_6BL_TGACv1_499360_AA1579440,TRIAE_CS42_1AL_TGACv1_000512_AA0013610,TRIAE_CS42_1BL_TGACv1_030605_AA0095500,TRIAE_CS42_1DS_TGACv1_081340_AA0260080,TRIAE_CS42_1AL_TGACv1_000755_AA0018450,TRIAE_CS42_7AS_TGACv1_570780_AA1840810,TRIAE_CS4…
GO:0019362	pyridine nucleotide metabolic process	biological_process	1.056e-09	4.0796e-08	27	1928	283	74606	TRIAE_CS42_2AS_TGACv1_112739_AA0344340,TRIAE_CS42_4BS_TGACv1_330279_AA1106910,TRIAE_CS42_5AL_TGACv1_376570_AA1238560,TRIAE_CS42_7AS_TGACv1_571836_AA1850200,TRIAE_CS42_7BS_TGACv1_592594_AA1941060,TRIAE_CS42_1AL_TGACv1_000755_AA0018450,TRIAE_CS42_7AS_TGACv1_570780_AA1840810,TRIAE_CS42_4AL_TGACv1_288659_AA0954680,TRIAE_CS42_1DL_TGACv1_063603_AA0229020,TRIAE_CS42_5BL_TGACv1_406279_AA1343630,TRIAE_CS4…
GO:0009084	glutamine family amino acid biosynthetic process	biological_process	1.104e-09	4.2408e-08	13	1928	62	74606	TRIAE_CS42_3AL_TGACv1_193640_AA0616020,TRIAE_CS42_1AL_TGACv1_000254_AA0007370,TRIAE_CS42_3DL_TGACv1_250063_AA0861520,TRIAE_CS42_3B_TGACv1_220588_AA0709800,TRIAE_CS42_5BL_TGACv1_404165_AA1287780,TRIAE_CS42_2DS_TGACv1_177239_AA0570170,TRIAE_CS42_3B_TGACv1_225182_AA0805900,TRIAE_CS42_1AL_TGACv1_000254_AA0007380,TRIAE_CS42_6BL_TGACv1_500652_AA1608010,TRIAE_CS42_U_TGACv1_654540_AA2150720,TRIAE_CS42_6D…
GO:0044435	plastid part	cellular_component	1.1242e-09	4.2936e-08	73	1928	1218	74606	TRIAE_CS42_1DL_TGACv1_061968_AA0206620,TRIAE_CS42_3B_TGACv1_222044_AA0755670,TRIAE_CS42_2DL_TGACv1_158000_AA0505500,TRIAE_CS42_4BL_TGACv1_321702_AA1064290,TRIAE_CS42_4DL_TGACv1_343812_AA1140000,TRIAE_CS42_7AS_TGACv1_569064_AA1806110,TRIAE_CS42_6AS_TGACv1_485824_AA1552830,TRIAE_CS42_1DS_TGACv1_082951_AA0265140,TRIAE_CS42_7BS_TGACv1_592029_AA1928690,TRIAE_CS42_6BS_TGACv1_514827_AA1664770,TRIAE_CS42…
GO:0016462	pyrophosphatase activity	molecular_function	1.1528e-09	4.3779e-08	82	1928	1862	74606	TRIAE_CS42_2DL_TGACv1_159040_AA0531140,TRIAE_CS42_3DL_TGACv1_251720_AA0884160,TRIAE_CS42_2BS_TGACv1_146038_AA0453790,TRIAE_CS42_7DL_TGACv1_603585_AA1986010,TRIAE_CS42_1AL_TGACv1_004538_AA0053800,TRIAE_CS42_1BS_TGACv1_050603_AA0173840,TRIAE_CS42_5BL_TGACv1_406685_AA1348600,TRIAE_CS42_1AL_TGACv1_004040_AA0052320,TRIAE_CS42_7BL_TGACv1_576793_AA1855160,TRIAE_CS42_1BL_TGACv1_032711_AA0133260,TRIAE_CS4…
GO:0005794	Golgi apparatus	cellular_component	1.1612e-09	4.385e-08	45	1928	708	74606	TRIAE_CS42_5AL_TGACv1_374774_AA1208800,TRIAE_CS42_2AL_TGACv1_096831_AA0321630,TRIAE_CS42_1BL_TGACv1_031076_AA0107250,TRIAE_CS42_6BS_TGACv1_514683_AA1663200,TRIAE_CS42_1BL_TGACv1_031047_AA0106660,TRIAE_CS42_3AL_TGACv1_194203_AA0628440,TRIAE_CS42_3DL_TGACv1_251228_AA0879080,TRIAE_CS42_4BL_TGACv1_321458_AA1060720,TRIAE_CS42_7BS_TGACv1_592783_AA1944260,TRIAE_CS42_2BL_TGACv1_129391_AA0381430,TRIAE_CS4…
GO:0044434	chloroplast part	cellular_component	1.1725e-09	4.403e-08	72	1928	1190	74606	TRIAE_CS42_2DL_TGACv1_160210_AA0548190,TRIAE_CS42_1BL_TGACv1_031520_AA0115500,TRIAE_CS42_3B_TGACv1_223576_AA0784150,TRIAE_CS42_2AS_TGACv1_112739_AA0344340,TRIAE_CS42_4DL_TGACv1_342433_AA1113510,TRIAE_CS42_2DL_TGACv1_159084_AA0532060,TRIAE_CS42_3DS_TGACv1_271872_AA0909840,TRIAE_CS42_5AL_TGACv1_379463_AA1256450,TRIAE_CS42_4DL_TGACv1_343777_AA1139610,TRIAE_CS42_7DS_TGACv1_622168_AA2034390,TRIAE_CS42…
GO:0009507	chloroplast	cellular_component	1.3287e-09	4.9621e-08	109	1928	2187	74606	TRIAE_CS42_4BS_TGACv1_329699_AA1103360,TRIAE_CS42_2DL_TGACv1_159587_AA0540290,TRIAE_CS42_3DL_TGACv1_249867_AA0857580,TRIAE_CS42_1DL_TGACv1_061593_AA0199390,TRIAE_CS42_6DS_TGACv1_543504_AA1740860,TRIAE_CS42_2AS_TGACv1_112052_AA0328860,TRIAE_CS42_2DS_TGACv1_179678_AA0608530,TRIAE_CS42_5AL_TGACv1_375755_AA1226710,TRIAE_CS42_3B_TGACv1_223754_AA0786670,TRIAE_CS42_1DL_TGACv1_061593_AA0199400,TRIAE_CS42…
GO:0009123	nucleoside monophosphate metabolic process	biological_process	1.3747e-09	5.1055e-08	35	1928	419	74606	TRIAE_CS42_7BL_TGACv1_579063_AA1903600,AIG90477,TRIAE_CS42_3AL_TGACv1_196429_AA0660330,TRIAE_CS42_3AL_TGACv1_194635_AA0637160,TRIAE_CS42_5DL_TGACv1_433836_AA1423410,TRIAE_CS42_1AL_TGACv1_004040_AA0052320,TRIAE_CS42_4BS_TGACv1_330279_AA1106910,TRIAE_CS42_5AL_TGACv1_376570_AA1238560,TRIAE_CS42_7AS_TGACv1_571836_AA1850200,TRIAE_CS42_7BS_TGACv1_592594_AA1941060,TRIAE_CS42_1DL_TGACv1_062210_AA0210500,…
GO:0006733	oxidoreduction coenzyme metabolic process	biological_process	1.7417e-09	6.433e-08	28	1928	308	74606	TRIAE_CS42_2AS_TGACv1_112739_AA0344340,TRIAE_CS42_4BS_TGACv1_330279_AA1106910,TRIAE_CS42_5AL_TGACv1_376570_AA1238560,TRIAE_CS42_7BS_TGACv1_592594_AA1941060,TRIAE_CS42_7AS_TGACv1_571836_AA1850200,TRIAE_CS42_1DL_TGACv1_063603_AA0229020,TRIAE_CS42_5BL_TGACv1_406279_AA1343630,TRIAE_CS42_7DS_TGACv1_622764_AA2045010,TRIAE_CS42_7AS_TGACv1_571112_AA1844780,TRIAE_CS42_5BS_TGACv1_423965_AA1385430,TRIAE_CS4…
GO:0022857	transmembrane transporter activity	molecular_function	1.9082e-09	7.0093e-08	111	1928	2667	74606	TRIAE_CS42_4BS_TGACv1_329699_AA1103360,TRIAE_CS42_1BL_TGACv1_031692_AA0118950,TRIAE_CS42_1BL_TGACv1_033087_AA0136910,TRIAE_CS42_4AL_TGACv1_290350_AA0984400,TRIAE_CS42_3DL_TGACv1_252453_AA0890080,TRIAE_CS42_4BL_TGACv1_320288_AA1034040,TRIAE_CS42_2DL_TGACv1_159649_AA0541000,TRIAE_CS42_6DS_TGACv1_544331_AA1747810,TRIAE_CS42_1DL_TGACv1_062176_AA0210030,TRIAE_CS42_2DL_TGACv1_158910_AA0528600,TRIAE_CS4…
GO:0016818	hydrolase activity, acting on acid anhydrides, in phosphorus-containing anhydrides	molecular_function	2.153e-09	7.8654e-08	82	1928	1886	74606	TRIAE_CS42_6BL_TGACv1_500085_AA1598540,TRIAE_CS42_5AL_TGACv1_375755_AA1226710,TRIAE_CS42_2AL_TGACv1_093051_AA0270470,TRIAE_CS42_3B_TGACv1_223754_AA0786670,TRIAE_CS42_5DL_TGACv1_434221_AA1432010,TRIAE_CS42_3DS_TGACv1_272258_AA0917870,TRIAE_CS42_2DS_TGACv1_179778_AA0609130,TRIAE_CS42_6DL_TGACv1_528467_AA1714310,TRIAE_CS42_3AL_TGACv1_195978_AA0656110,TRIAE_CS42_4BS_TGACv1_327981_AA1080370,TRIAE_CS42…
GO:0016817	hydrolase activity, acting on acid anhydrides	molecular_function	4.1525e-09	1.5088e-07	82	1928	1910	74606	TRIAE_CS42_5BS_TGACv1_423792_AA1383390,TRIAE_CS42_3AL_TGACv1_197883_AA0667460,TRIAE_CS42_3B_TGACv1_223611_AA0784530,TRIAE_CS42_1BL_TGACv1_031047_AA0106660,TRIAE_CS42_1AS_TGACv1_019881_AA0072380,TRIAE_CS42_1DS_TGACv1_080446_AA0248170,TRIAE_CS42_2DL_TGACv1_159040_AA0531140,TRIAE_CS42_1AL_TGACv1_004538_AA0053800,TRIAE_CS42_1BS_TGACv1_050603_AA0173840,TRIAE_CS42_7DL_TGACv1_603585_AA1986010,TRIAE_CS42…
GO:0006656	phosphatidylcholine biosynthetic process	biological_process	5.3356e-09	1.9283e-07	7	1928	12	74606	TRIAE_CS42_3B_TGACv1_221027_AA0727340,TRIAE_CS42_3AL_TGACv1_196405_AA0660080,TRIAE_CS42_1DL_TGACv1_062419_AA0214280,TRIAE_CS42_1DL_TGACv1_063094_AA0223830,TRIAE_CS42_3DL_TGACv1_254806_AA0896680,TRIAE_CS42_1BL_TGACv1_032207_AA0126810,TRIAE_CS42_1AL_TGACv1_000734_AA0018090
GO:0006066	alcohol metabolic process	biological_process	5.442e-09	1.9562e-07	21	1928	189	74606	TRIAE_CS42_3B_TGACv1_221027_AA0727340,TRIAE_CS42_7DL_TGACv1_602694_AA1965500,TRIAE_CS42_5AL_TGACv1_378173_AA1251720,TRIAE_CS42_3AL_TGACv1_196405_AA0660080,TRIAE_CS42_3B_TGACv1_222513_AA0766220,TRIAE_CS42_4AL_TGACv1_288528_AA0951160,TRIAE_CS42_3DL_TGACv1_254806_AA0896680,TRIAE_CS42_5DL_TGACv1_434775_AA1441440,TRIAE_CS42_5AL_TGACv1_376140_AA1232710,TRIAE_CS42_5DL_TGACv1_433402_AA1412060,TRIAE_CS42_…
GO:0046500	S-adenosylmethionine metabolic process	biological_process	5.8019e-09	2.0745e-07	8	1928	19	74606	TRIAE_CS42_6BL_TGACv1_499577_AA1586520,TRIAE_CS42_3DS_TGACv1_274021_AA0934410,TRIAE_CS42_6DL_TGACv1_526382_AA1681340,TRIAE_CS42_3B_TGACv1_223441_AA0782230,TRIAE_CS42_6BL_TGACv1_500297_AA1602810,TRIAE_CS42_3AS_TGACv1_213440_AA0706960,TRIAE_CS42_6AL_TGACv1_471945_AA1516140,TRIAE_CS42_6AL_TGACv1_475648_AA1536640
GO:0072524	pyridine-containing compound metabolic process	biological_process	5.8423e-09	2.0779e-07	27	1928	302	74606	TRIAE_CS42_7DS_TGACv1_624347_AA2060690,TRIAE_CS42_3DL_TGACv1_250475_AA0868810,TRIAE_CS42_5AS_TGACv1_394202_AA1278730,TRIAE_CS42_5DS_TGACv1_457334_AA1485300,TRIAE_CS42_5DL_TGACv1_433836_AA1423410,TRIAE_CS42_1BL_TGACv1_030605_AA0095500,TRIAE_CS42_3AL_TGACv1_194635_AA0637160,TRIAE_CS42_3AL_TGACv1_196429_AA0660330,TRIAE_CS42_2AL_TGACv1_094970_AA0305380,TRIAE_CS42_1DS_TGACv1_081340_AA0260080,TRIAE_CS4…
GO:0046034	ATP metabolic process	biological_process	7.1736e-09	2.5379e-07	30	1928	329	74606	TRIAE_CS42_3AL_TGACv1_196429_AA0660330,TRIAE_CS42_1DS_TGACv1_081340_AA0260080,TRIAE_CS42_7BL_TGACv1_579063_AA1903600,AIG90477,TRIAE_CS42_1BL_TGACv1_031692_AA0118950,TRIAE_CS42_5DL_TGACv1_433836_AA1423410,TRIAE_CS42_5DS_TGACv1_457334_AA1485300,TRIAE_CS42_5AS_TGACv1_394202_AA1278730,TRIAE_CS42_1AL_TGACv1_004040_AA0052320,TRIAE_CS42_3DL_TGACv1_250475_AA0868810,TRIAE_CS42_3AL_TGACv1_194635_AA0637160,…
GO:1901615	organic hydroxy compound metabolic process	biological_process	7.4324e-09	2.6158e-07	25	1928	267	74606	TRIAE_CS42_5AL_TGACv1_378173_AA1251720,TRIAE_CS42_3B_TGACv1_221027_AA0727340,TRIAE_CS42_7DL_TGACv1_602694_AA1965500,TRIAE_CS42_5DL_TGACv1_434775_AA1441440,TRIAE_CS42_5AL_TGACv1_376140_AA1232710,TRIAE_CS42_3AS_TGACv1_210457_AA0672630,TRIAE_CS42_7DL_TGACv1_604116_AA1994020,TRIAE_CS42_3AL_TGACv1_196405_AA0660080,TRIAE_CS42_3B_TGACv1_222513_AA0766220,TRIAE_CS42_4AL_TGACv1_288528_AA0951160,TRIAE_CS42_…
GO:0009536	plastid	cellular_component	1.049e-08	3.6725e-07	109	1928	2278	74606	TRIAE_CS42_2AL_TGACv1_094054_AA0291710,TRIAE_CS42_1DL_TGACv1_061125_AA0186220,TRIAE_CS42_7AL_TGACv1_557134_AA1777250,AIG90477,TRIAE_CS42_2AS_TGACv1_113349_AA0354840,TRIAE_CS42_1AL_TGACv1_000384_AA0010710,TRIAE_CS42_1AL_TGACv1_000132_AA0004290,TRIAE_CS42_3AS_TGACv1_211205_AA0686630,TRIAE_CS42_4DS_TGACv1_361391_AA1166860,TRIAE_CS42_6BS_TGACv1_514208_AA1656950,TRIAE_CS42_5BL_TGACv1_404454_AA1300370,…
GO:0044765	single-organism transport	biological_process	1.0921e-08	3.8037e-07	173	1928	4585	74606	TRIAE_CS42_1AL_TGACv1_001031_AA0023780,TRIAE_CS42_4DS_TGACv1_361471_AA1168550,TRIAE_CS42_3B_TGACv1_223754_AA0786670,TRIAE_CS42_4DL_TGACv1_342367_AA1111630,TRIAE_CS42_1BL_TGACv1_030968_AA0104740,TRIAE_CS42_U_TGACv1_641184_AA2087580,TRIAE_CS42_U_TGACv1_644029_AA2136580,TRIAE_CS42_U_TGACv1_640854_AA2077410,TRIAE_CS42_2DL_TGACv1_158421_AA0518370,TRIAE_CS42_1DL_TGACv1_063205_AA0224940,TRIAE_CS42_4AL_T…
GO:0055085	transmembrane transport	biological_process	1.2596e-08	4.3645e-07	121	1928	3074	74606	TRIAE_CS42_3B_TGACv1_223611_AA0784540,TRIAE_CS42_7BS_TGACv1_592565_AA1940460,TRIAE_CS42_5DL_TGACv1_432946_AA1395680,TRIAE_CS42_2DL_TGACv1_160210_AA0548190,TRIAE_CS42_6DS_TGACv1_542931_AA1732740,TRIAE_CS42_3B_TGACv1_222757_AA0770040,TRIAE_CS42_2BL_TGACv1_129973_AA0400750,TRIAE_CS42_3DL_TGACv1_249213_AA0841560,TRIAE_CS42_6BS_TGACv1_514140_AA1655890,TRIAE_CS42_1DL_TGACv1_061264_AA0190480,TRIAE_CS42_…
GO:1902578	single-organism localization	biological_process	1.4336e-08	4.9418e-07	174	1928	4639	74606	TRIAE_CS42_3AL_TGACv1_193952_AA0623370,TRIAE_CS42_4DL_TGACv1_342952_AA1125960,TRIAE_CS42_6BL_TGACv1_500073_AA1598210,TRIAE_CS42_6DS_TGACv1_542944_AA1733060,TRIAE_CS42_4AL_TGACv1_288269_AA0942920,TRIAE_CS42_3DS_TGACv1_272832_AA0925630,TRIAE_CS42_5BL_TGACv1_405907_AA1337450,TRIAE_CS42_4AS_TGACv1_308212_AA1026690,TRIAE_CS42_4DL_TGACv1_342547_AA1116310,TRIAE_CS42_3B_TGACv1_221849_AA0751620,TRIAE_CS42…
GO:0003824	catalytic activity	molecular_function	1.5165e-08	5.201e-07	793	1928	28495	74606	TRIAE_CS42_1DS_TGACv1_080723_AA0252750,TRIAE_CS42_5BL_TGACv1_404684_AA1308350,TRIAE_CS42_3AL_TGACv1_195978_AA0656110,TRIAE_CS42_1BL_TGACv1_030950_AA0104200,TRIAE_CS42_1DL_TGACv1_061476_AA0196370,TRIAE_CS42_7AS_TGACv1_571185_AA1845550,TRIAE_CS42_2DL_TGACv1_157905_AA0501220,TRIAE_CS42_7DL_TGACv1_603622_AA1986410,TRIAE_CS42_7AS_TGACv1_571112_AA1844780,TRIAE_CS42_2BL_TGACv1_129564_AA0388780,TRIAE_CS4…
GO:0000139	Golgi membrane	cellular_component	2.0224e-08	6.9009e-07	25	1928	298	74606	TRIAE_CS42_4DS_TGACv1_361471_AA1168550,TRIAE_CS42_1BL_TGACv1_031047_AA0106660,TRIAE_CS42_1AL_TGACv1_001331_AA0028860,TRIAE_CS42_1BL_TGACv1_031076_AA0107250,TRIAE_CS42_6BS_TGACv1_514683_AA1663200,TRIAE_CS42_2AL_TGACv1_096831_AA0321630,TRIAE_CS42_5AL_TGACv1_374774_AA1208800,TRIAE_CS42_2DL_TGACv1_157905_AA0501220,TRIAE_CS42_7BS_TGACv1_592783_AA1944260,TRIAE_CS42_4BL_TGACv1_321458_AA1060720,TRIAE_CS4…
GO:0009523	photosystem II	cellular_component	2.1806e-08	7.3722e-07	26	1928	207	74606	TRIAE_CS42_5BL_TGACv1_404454_AA1300300,TRIAE_CS42_7AS_TGACv1_569064_AA1806110,TRIAE_CS42_5DL_TGACv1_434747_AA1440970,TRIAE_CS42_6AS_TGACv1_486605_AA1563110,TRIAE_CS42_7DS_TGACv1_625332_AA2064910,TRIAE_CS42_6AS_TGACv1_485824_AA1552830,TRIAE_CS42_7BS_TGACv1_592029_AA1928690,TRIAE_CS42_3B_TGACv1_227262_AA0822510,TRIAE_CS42_6BS_TGACv1_514827_AA1664770,TRIAE_CS42_1AL_TGACv1_000383_AA0010660,TRIAE_CS42…
GO:0005215	transporter activity	molecular_function	2.1825e-08	7.3722e-07	115	1928	2926	74606	TRIAE_CS42_2BL_TGACv1_129973_AA0400750,TRIAE_CS42_3B_TGACv1_222757_AA0770040,TRIAE_CS42_6DS_TGACv1_542931_AA1732740,TRIAE_CS42_5DL_TGACv1_432946_AA1395680,TRIAE_CS42_7BS_TGACv1_592565_AA1940460,TRIAE_CS42_3B_TGACv1_223611_AA0784540,TRIAE_CS42_1BL_TGACv1_030350_AA0087730,TRIAE_CS42_5DL_TGACv1_436079_AA1457800,TRIAE_CS42_6BS_TGACv1_514140_AA1655890,TRIAE_CS42_5AL_TGACv1_374188_AA1192880,TRIAE_CS42_…
GO:0051649	establishment of localization in cell	biological_process	2.5457e-08	8.5562e-07	57	1928	1057	74606	TRIAE_CS42_6BL_TGACv1_500073_AA1598210,TRIAE_CS42_5DL_TGACv1_434879_AA1443050,TRIAE_CS42_6BL_TGACv1_499660_AA1588490,TRIAE_CS42_5AL_TGACv1_374451_AA1200460,TRIAE_CS42_4DS_TGACv1_362497_AA1180110,TRIAE_CS42_2AS_TGACv1_113808_AA0360930,TRIAE_CS42_4BS_TGACv1_328452_AA1088030,TRIAE_CS42_6DL_TGACv1_526657_AA1689120,TRIAE_CS42_2DL_TGACv1_158815_AA0526570,TRIAE_CS42_7AS_TGACv1_571321_AA1846800,TRIAE_CS4…
GO:0008443	phosphofructokinase activity	molecular_function	2.7234e-08	9.1078e-07	10	1928	44	74606	TRIAE_CS42_7AS_TGACv1_571836_AA1850200,TRIAE_CS42_4AS_TGACv1_306645_AA1011430,TRIAE_CS42_7BS_TGACv1_592594_AA1941060,TRIAE_CS42_4BL_TGACv1_320480_AA1040880,TRIAE_CS42_1DL_TGACv1_063603_AA0229020,TRIAE_CS42_7DS_TGACv1_622764_AA2045010,TRIAE_CS42_6AL_TGACv1_471645_AA1512290,TRIAE_CS42_4DL_TGACv1_343659_AA1137850,TRIAE_CS42_1AL_TGACv1_000755_AA0018450,TRIAE_CS42_7AS_TGACv1_570780_AA1840810
GO:0016052	carbohydrate catabolic process	biological_process	2.8054e-08	9.3356e-07	32	1928	447	74606	TRIAE_CS42_3DL_TGACv1_251020_AA0876220,TRIAE_CS42_3AL_TGACv1_196429_AA0660330,TRIAE_CS42_5DL_TGACv1_433836_AA1423410,TRIAE_CS42_3B_TGACv1_222141_AA0758150,TRIAE_CS42_3AL_TGACv1_196039_AA0656760,TRIAE_CS42_3AL_TGACv1_194635_AA0637160,TRIAE_CS42_4BS_TGACv1_330279_AA1106910,TRIAE_CS42_7BS_TGACv1_592594_AA1941060,TRIAE_CS42_7AS_TGACv1_571836_AA1850200,TRIAE_CS42_5AL_TGACv1_376570_AA1238560,TRIAE_CS42…
GO:0016615	malate dehydrogenase activity	molecular_function	2.8857e-08	9.5555e-07	10	1928	42	74606	TRIAE_CS42_1BL_TGACv1_030950_AA0104200,TRIAE_CS42_2AS_TGACv1_112185_AA0332560,TRIAE_CS42_1BL_TGACv1_030411_AA0089860,TRIAE_CS42_1DL_TGACv1_061661_AA0201230,TRIAE_CS42_1AL_TGACv1_000087_AA0002830,TRIAE_CS42_1AL_TGACv1_000369_AA0010430,TRIAE_CS42_1BL_TGACv1_031464_AA0114600,TRIAE_CS42_7BL_TGACv1_578344_AA1893330,TRIAE_CS42_1AL_TGACv1_002631_AA0043990,TRIAE_CS42_1DL_TGACv1_062583_AA0216850
GO:0090407	organophosphate biosynthetic process	biological_process	2.9339e-08	9.6674e-07	37	1928	529	74606	TRIAE_CS42_7AL_TGACv1_556888_AA1772870,TRIAE_CS42_6AL_TGACv1_473321_AA1530120,TRIAE_CS42_1AL_TGACv1_000734_AA0018090,TRIAE_CS42_1DL_TGACv1_063094_AA0223830,TRIAE_CS42_2BS_TGACv1_146926_AA0475500,TRIAE_CS42_2BS_TGACv1_146900_AA0475120,TRIAE_CS42_1DL_TGACv1_063573_AA0228750,TRIAE_CS42_2DS_TGACv1_179608_AA0608200,TRIAE_CS42_2DL_TGACv1_158421_AA0518370,TRIAE_CS42_1AL_TGACv1_000512_AA0013610,TRIAE_CS4…
GO:0009086	methionine biosynthetic process	biological_process	3.3249e-08	1.0902e-06	10	1928	40	74606	TRIAE_CS42_4AS_TGACv1_307275_AA1019080,TRIAE_CS42_5DS_TGACv1_456564_AA1474130,TRIAE_CS42_7DS_TGACv1_624143_AA2059180,TRIAE_CS42_4BL_TGACv1_320349_AA1036310,TRIAE_CS42_5BS_TGACv1_423584_AA1379990,TRIAE_CS42_4DL_TGACv1_343385_AA1133850,TRIAE_CS42_4DS_TGACv1_361983_AA1175310,TRIAE_CS42_4BS_TGACv1_330819_AA1108930,TRIAE_CS42_4AL_TGACv1_290117_AA0981910,TRIAE_CS42_5AS_TGACv1_393328_AA1271350
GO:0015121	phosphoenolpyruvate:phosphate antiporter activity	molecular_function	4.1031e-08	1.301e-06	5	1928	6	74606	TRIAE_CS42_3B_TGACv1_223199_AA0777850,TRIAE_CS42_5BL_TGACv1_405907_AA1337450,TRIAE_CS42_3AS_TGACv1_212675_AA0702590,TRIAE_CS42_5DL_TGACv1_432946_AA1395680,TRIAE_CS42_5AL_TGACv1_374188_AA1192880
GO:0015714	phosphoenolpyruvate transport	biological_process	4.1031e-08	1.301e-06	5	1928	6	74606	TRIAE_CS42_3AS_TGACv1_212675_AA0702590,TRIAE_CS42_5BL_TGACv1_405907_AA1337450,TRIAE_CS42_3B_TGACv1_223199_AA0777850,TRIAE_CS42_5AL_TGACv1_374188_AA1192880,TRIAE_CS42_5DL_TGACv1_432946_AA1395680
GO:0015717	triose phosphate transport	biological_process	4.1031e-08	1.301e-06	5	1928	6	74606	TRIAE_CS42_5DL_TGACv1_432946_AA1395680,TRIAE_CS42_5AL_TGACv1_374188_AA1192880,TRIAE_CS42_3B_TGACv1_223199_AA0777850,TRIAE_CS42_5BL_TGACv1_405907_AA1337450,TRIAE_CS42_3AS_TGACv1_212675_AA0702590
GO:0035436	triose phosphate transmembrane transport	biological_process	4.1031e-08	1.301e-06	5	1928	6	74606	TRIAE_CS42_5BL_TGACv1_405907_AA1337450,TRIAE_CS42_3B_TGACv1_223199_AA0777850,TRIAE_CS42_3AS_TGACv1_212675_AA0702590,TRIAE_CS42_5DL_TGACv1_432946_AA1395680,TRIAE_CS42_5AL_TGACv1_374188_AA1192880
GO:0071917	triose-phosphate transmembrane transporter activity	molecular_function	4.1031e-08	1.301e-06	5	1928	6	74606	TRIAE_CS42_3AS_TGACv1_212675_AA0702590,TRIAE_CS42_3B_TGACv1_223199_AA0777850,TRIAE_CS42_5BL_TGACv1_405907_AA1337450,TRIAE_CS42_5DL_TGACv1_432946_AA1395680,TRIAE_CS42_5AL_TGACv1_374188_AA1192880
GO:0089721	phosphoenolpyruvate transmembrane transporter activity	molecular_function	4.1031e-08	1.301e-06	5	1928	6	74606	TRIAE_CS42_5AL_TGACv1_374188_AA1192880,TRIAE_CS42_5DL_TGACv1_432946_AA1395680,TRIAE_CS42_3AS_TGACv1_212675_AA0702590,TRIAE_CS42_5BL_TGACv1_405907_AA1337450,TRIAE_CS42_3B_TGACv1_223199_AA0777850
GO:0089722	phosphoenolpyruvate transmembrane transport	biological_process	4.1031e-08	1.301e-06	5	1928	6	74606	TRIAE_CS42_3B_TGACv1_223199_AA0777850,TRIAE_CS42_5BL_TGACv1_405907_AA1337450,TRIAE_CS42_3AS_TGACv1_212675_AA0702590,TRIAE_CS42_5DL_TGACv1_432946_AA1395680,TRIAE_CS42_5AL_TGACv1_374188_AA1192880
GO:0006006	glucose metabolic process	biological_process	4.5794e-08	1.4452e-06	11	1928	56	74606	TRIAE_CS42_6AS_TGACv1_487743_AA1572700,TRIAE_CS42_6DL_TGACv1_527365_AA1702830,TRIAE_CS42_3B_TGACv1_222141_AA0758150,TRIAE_CS42_3AL_TGACv1_196039_AA0656760,TRIAE_CS42_6DS_TGACv1_542766_AA1729850,TRIAE_CS42_3DL_TGACv1_251020_AA0876220,TRIAE_CS42_6BS_TGACv1_515835_AA1672680,TRIAE_CS42_2AL_TGACv1_094970_AA0305380,TRIAE_CS42_1DS_TGACv1_081340_AA0260080,TRIAE_CS42_6DL_TGACv1_526670_AA1689480,TRIAE_CS42…
GO:0046907	intracellular transport	biological_process	4.6557e-08	1.4624e-06	49	1928	841	74606	TRIAE_CS42_6DS_TGACv1_542583_AA1724790,TRIAE_CS42_7AL_TGACv1_556695_AA1769100,TRIAE_CS42_7DL_TGACv1_602635_AA1963430,TRIAE_CS42_U_TGACv1_641043_AA2083140,TRIAE_CS42_4AL_TGACv1_288747_AA0957130,TRIAE_CS42_3B_TGACv1_223093_AA0776380,TRIAE_CS42_2BL_TGACv1_130310_AA0408540,TRIAE_CS42_6AS_TGACv1_486953_AA1566790,TRIAE_CS42_2BS_TGACv1_146389_AA0464090,TRIAE_CS42_1DL_TGACv1_061297_AA0191640,TRIAE_CS42_7…
GO:0006886	intracellular protein transport	biological_process	4.8371e-08	1.5123e-06	37	1928	551	74606	TRIAE_CS42_3DS_TGACv1_272355_AA0919480,TRIAE_CS42_3AL_TGACv1_194730_AA0638300,TRIAE_CS42_4DS_TGACv1_361471_AA1168550,TRIAE_CS42_6BS_TGACv1_514140_AA1655890,TRIAE_CS42_1AL_TGACv1_001331_AA0028860,TRIAE_CS42_7DS_TGACv1_623122_AA2049790,TRIAE_CS42_3B_TGACv1_223525_AA0783520,TRIAE_CS42_7AS_TGACv1_570573_AA1837850,TRIAE_CS42_6DS_TGACv1_542697_AA1728230,TRIAE_CS42_2DL_TGACv1_160210_AA0548190,TRIAE_CS42…
GO:0006629	lipid metabolic process	biological_process	8.1415e-08	2.5337e-06	78	1928	1776	74606	TRIAE_CS42_5DL_TGACv1_433024_AA1398620,TRIAE_CS42_5AL_TGACv1_375241_AA1218400,TRIAE_CS42_U_TGACv1_643776_AA2134960,TRIAE_CS42_5BL_TGACv1_404481_AA1301440,TRIAE_CS42_7DS_TGACv1_622381_AA2038650,TRIAE_CS42_4AL_TGACv1_288528_AA0951160,TRIAE_CS42_U_TGACv1_641722_AA2102520,TRIAE_CS42_2AS_TGACv1_112777_AA0345060,TRIAE_CS42_4BS_TGACv1_327871_AA1077160,TRIAE_CS42_1DL_TGACv1_061444_AA0195450,TRIAE_CS42_4D…
GO:0051641	cellular localization	biological_process	8.7938e-08	2.724e-06	58	1928	1125	74606	TRIAE_CS42_3DS_TGACv1_272355_AA0919480,TRIAE_CS42_3B_TGACv1_221849_AA0751620,TRIAE_CS42_3AL_TGACv1_194730_AA0638300,TRIAE_CS42_5AS_TGACv1_394157_AA1278420,TRIAE_CS42_4DS_TGACv1_361471_AA1168550,TRIAE_CS42_5DL_TGACv1_434221_AA1432010,TRIAE_CS42_6BS_TGACv1_514140_AA1655890,TRIAE_CS42_1AL_TGACv1_001331_AA0028860,TRIAE_CS42_5AS_TGACv1_394157_AA1278470,TRIAE_CS42_7DS_TGACv1_623122_AA2049790,TRIAE_CS42…
GO:0003979	UDP-glucose 6-dehydrogenase activity	molecular_function	1.0371e-07	3.198e-06	6	1928	12	74606	TRIAE_CS42_4BS_TGACv1_329796_AA1104090,TRIAE_CS42_5DL_TGACv1_433028_AA1398770,TRIAE_CS42_5AL_TGACv1_375282_AA1219100,TRIAE_CS42_4AL_TGACv1_288429_AA0948580,TRIAE_CS42_5BL_TGACv1_404418_AA1299220,TRIAE_CS42_4DS_TGACv1_361591_AA1170510
GO:0016887	ATPase activity	molecular_function	1.1568e-07	3.5508e-06	42	1928	848	74606	TRIAE_CS42_4DL_TGACv1_343153_AA1130690,TRIAE_CS42_4AS_TGACv1_307419_AA1020240,TRIAE_CS42_4BS_TGACv1_327981_AA1080370,TRIAE_CS42_6DL_TGACv1_528467_AA1714310,TRIAE_CS42_2DS_TGACv1_179778_AA0609130,TRIAE_CS42_2BL_TGACv1_129973_AA0400750,TRIAE_CS42_3B_TGACv1_223576_AA0784150,TRIAE_CS42_U_TGACv1_642968_AA2125470,TRIAE_CS42_3DS_TGACv1_272258_AA0917870,TRIAE_CS42_5DL_TGACv1_434221_AA1432010,TRIAE_CS42_3…
GO:0071702	organic substance transport	biological_process	1.6387e-07	5.0068e-06	75	1928	1537	74606	TRIAE_CS42_5AL_TGACv1_374188_AA1192880,TRIAE_CS42_6BS_TGACv1_514140_AA1655890,TRIAE_CS42_7BL_TGACv1_577333_AA1872500,TRIAE_CS42_3AL_TGACv1_194730_AA0638300,TRIAE_CS42_3DS_TGACv1_272355_AA0919480,TRIAE_CS42_5DL_TGACv1_432946_AA1395680,TRIAE_CS42_2DL_TGACv1_160210_AA0548190,TRIAE_CS42_3B_TGACv1_223611_AA0784540,TRIAE_CS42_6AL_TGACv1_471255_AA1505700,TRIAE_CS42_1BL_TGACv1_030295_AA0085760,TRIAE_CS42…
GO:0005996	monosaccharide metabolic process	biological_process	1.9535e-07	5.9419e-06	23	1928	284	74606	TRIAE_CS42_4BL_TGACv1_321135_AA1056010,TRIAE_CS42_6BS_TGACv1_515835_AA1672680,TRIAE_CS42_1DS_TGACv1_080723_AA0252750,TRIAE_CS42_4AS_TGACv1_306645_AA1011430,TRIAE_CS42_2DL_TGACv1_160680_AA0553060,TRIAE_CS42_4DL_TGACv1_343659_AA1137850,TRIAE_CS42_2AS_TGACv1_112396_AA0337300,TRIAE_CS42_6BS_TGACv1_513935_AA1652480,TRIAE_CS42_3DL_TGACv1_251020_AA0876220,TRIAE_CS42_6DL_TGACv1_526670_AA1689480,TRIAE_CS4…
GO:0004373	glycogen (starch) synthase activity	molecular_function	2.0013e-07	6.0598e-06	7	1928	24	74606	TRIAE_CS42_2BL_TGACv1_131141_AA0423210,TRIAE_CS42_2DL_TGACv1_159587_AA0540290,TRIAE_CS42_2AL_TGACv1_093163_AA0273760,TRIAE_CS42_1DL_TGACv1_062182_AA0210070,TRIAE_CS42_1AL_TGACv1_000384_AA0010710,TRIAE_CS42_2BL_TGACv1_131614_AA0429850,TRIAE_CS42_1BL_TGACv1_031136_AA0108420
GO:0034613	cellular protein localization	biological_process	2.2147e-07	6.6759e-06	38	1928	607	74606	TRIAE_CS42_7DL_TGACv1_602635_AA1963430,TRIAE_CS42_U_TGACv1_641043_AA2083140,TRIAE_CS42_4AL_TGACv1_288747_AA0957130,TRIAE_CS42_3B_TGACv1_223093_AA0776380,TRIAE_CS42_1DL_TGACv1_061297_AA0191640,TRIAE_CS42_6AS_TGACv1_486953_AA1566790,TRIAE_CS42_6DS_TGACv1_542583_AA1724790,TRIAE_CS42_7AL_TGACv1_556695_AA1769100,TRIAE_CS42_4DL_TGACv1_343137_AA1130350,TRIAE_CS42_7AS_TGACv1_570466_AA1836110,TRIAE_CS42_2…
GO:0015399	primary active transmembrane transporter activity	molecular_function	2.3287e-07	6.9572e-06	26	1928	399	74606	TRIAE_CS42_3AS_TGACv1_211205_AA0686630,TRIAE_CS42_1AL_TGACv1_004040_AA0052320,TRIAE_CS42_7BL_TGACv1_576793_AA1855160,TRIAE_CS42_1BL_TGACv1_031692_AA0118950,TRIAE_CS42_3DS_TGACv1_273334_AA0930440,TRIAE_CS42_3AS_TGACv1_210799_AA0679360,TRIAE_CS42_2DL_TGACv1_159040_AA0531140,TRIAE_CS42_3DL_TGACv1_250717_AA0872310,TRIAE_CS42_3B_TGACv1_221643_AA0746430,TRIAE_CS42_3AL_TGACv1_193952_AA0623370,TRIAE_CS42…
GO:0015405	P-P-bond-hydrolysis-driven transmembrane transporter activity	molecular_function	2.3287e-07	6.9572e-06	26	1928	399	74606	TRIAE_CS42_6BS_TGACv1_514140_AA1655890,TRIAE_CS42_3B_TGACv1_223754_AA0786670,TRIAE_CS42_2AL_TGACv1_093051_AA0270470,TRIAE_CS42_6DS_TGACv1_542697_AA1728230,TRIAE_CS42_2BL_TGACv1_129973_AA0400750,TRIAE_CS42_3DS_TGACv1_272258_AA0917870,TRIAE_CS42_7AS_TGACv1_569469_AA1816750,TRIAE_CS42_1DL_TGACv1_062210_AA0210500,TRIAE_CS42_7DL_TGACv1_603585_AA1986010,TRIAE_CS42_3DL_TGACv1_250717_AA0872310,TRIAE_CS42…
GO:0006073	cellular glucan metabolic process	biological_process	2.5133e-07	7.4362e-06	29	1928	431	74606	TRIAE_CS42_2BS_TGACv1_148740_AA0494910,TRIAE_CS42_2BL_TGACv1_131614_AA0429850,TRIAE_CS42_5AL_TGACv1_379463_AA1256450,TRIAE_CS42_2AS_TGACv1_112747_AA0344470,TRIAE_CS42_5AL_TGACv1_374631_AA1204970,TRIAE_CS42_2BL_TGACv1_131489_AA0428400,TRIAE_CS42_5AL_TGACv1_375073_AA1215420,TRIAE_CS42_2AL_TGACv1_093096_AA0271930,TRIAE_CS42_1BL_TGACv1_031136_AA0108420,TRIAE_CS42_1BL_TGACv1_031712_AA0119450,TRIAE_CS4…
GO:0044042	glucan metabolic process	biological_process	2.5133e-07	7.4362e-06	29	1928	431	74606	TRIAE_CS42_2BL_TGACv1_131489_AA0428400,TRIAE_CS42_5AL_TGACv1_374631_AA1204970,TRIAE_CS42_5AL_TGACv1_375073_AA1215420,TRIAE_CS42_2AL_TGACv1_093096_AA0271930,TRIAE_CS42_2BL_TGACv1_131614_AA0429850,TRIAE_CS42_2BS_TGACv1_148740_AA0494910,TRIAE_CS42_5AL_TGACv1_379463_AA1256450,TRIAE_CS42_2AS_TGACv1_112747_AA0344470,TRIAE_CS42_2AL_TGACv1_093163_AA0273760,TRIAE_CS42_4DS_TGACv1_361657_AA1171120,TRIAE_CS4…
GO:0012505	endomembrane system	cellular_component	2.5222e-07	7.4362e-06	71	1928	1551	74606	TRIAE_CS42_3DL_TGACv1_251447_AA0881600,TRIAE_CS42_5DS_TGACv1_458693_AA1494370,TRIAE_CS42_4BL_TGACv1_320261_AA1032800,TRIAE_CS42_3AS_TGACv1_210886_AA0680800,TRIAE_CS42_2DL_TGACv1_160096_AA0546640,TRIAE_CS42_4BS_TGACv1_328452_AA1088030,TRIAE_CS42_1DL_TGACv1_061713_AA0202170,TRIAE_CS42_2DL_TGACv1_158815_AA0526570,TRIAE_CS42_1BS_TGACv1_049652_AA0158940,TRIAE_CS42_2DL_TGACv1_161143_AA0557040,TRIAE_CS4…
GO:0070727	cellular macromolecule localization	biological_process	2.8148e-07	8.2625e-06	38	1928	613	74606	TRIAE_CS42_7DS_TGACv1_623122_AA2049790,TRIAE_CS42_6DS_TGACv1_542697_AA1728230,TRIAE_CS42_7AS_TGACv1_570573_AA1837850,TRIAE_CS42_3B_TGACv1_223525_AA0783520,TRIAE_CS42_2DL_TGACv1_160210_AA0548190,TRIAE_CS42_3DS_TGACv1_272355_AA0919480,TRIAE_CS42_3AL_TGACv1_194730_AA0638300,TRIAE_CS42_5DL_TGACv1_434221_AA1432010,TRIAE_CS42_4DS_TGACv1_361471_AA1168550,TRIAE_CS42_1AL_TGACv1_001331_AA0028860,TRIAE_CS42…
GO:0015031	protein transport	biological_process	4.8057e-07	1.4045e-05	46	1928	819	74606	TRIAE_CS42_4DL_TGACv1_343137_AA1130350,TRIAE_CS42_7AS_TGACv1_570466_AA1836110,TRIAE_CS42_2BL_TGACv1_131305_AA0425720,TRIAE_CS42_2BL_TGACv1_132610_AA0438600,TRIAE_CS42_3AS_TGACv1_211332_AA0688720,TRIAE_CS42_7DL_TGACv1_602635_AA1963430,TRIAE_CS42_U_TGACv1_641043_AA2083140,TRIAE_CS42_4AL_TGACv1_288747_AA0957130,TRIAE_CS42_3B_TGACv1_223093_AA0776380,TRIAE_CS42_5DL_TGACv1_432935_AA1395080,TRIAE_CS42_6…
GO:0016866	intramolecular transferase activity	molecular_function	4.8718e-07	1.4177e-05	17	1928	164	74606	TRIAE_CS42_4DS_TGACv1_361657_AA1171120,TRIAE_CS42_2DL_TGACv1_161143_AA0557040,TRIAE_CS42_2AL_TGACv1_094865_AA0304200,TRIAE_CS42_U_TGACv1_641465_AA2095880,TRIAE_CS42_2BL_TGACv1_131489_AA0428400,TRIAE_CS42_2AL_TGACv1_093096_AA0271930,TRIAE_CS42_3DL_TGACv1_251020_AA0876220,TRIAE_CS42_3DL_TGACv1_250086_AA0861990,TRIAE_CS42_4AL_TGACv1_289959_AA0979560,TRIAE_CS42_4BS_TGACv1_328010_AA1080930,TRIAE_CS42_…
GO:0045184	establishment of protein localization	biological_process	5.3068e-07	1.5376e-05	47	1928	849	74606	TRIAE_CS42_1AL_TGACv1_001331_AA0028860,TRIAE_CS42_6BS_TGACv1_514140_AA1655890,TRIAE_CS42_5DL_TGACv1_434221_AA1432010,TRIAE_CS42_4DS_TGACv1_361471_AA1168550,TRIAE_CS42_3AL_TGACv1_194730_AA0638300,TRIAE_CS42_3DS_TGACv1_272355_AA0919480,TRIAE_CS42_2DL_TGACv1_160210_AA0548190,TRIAE_CS42_1BL_TGACv1_030295_AA0085760,TRIAE_CS42_4AL_TGACv1_291275_AA0993410,TRIAE_CS42_7AS_TGACv1_570573_AA1837850,TRIAE_CS4…
GO:0019684	photosynthesis, light reaction	biological_process	6.5868e-07	1.9003e-05	23	1928	213	74606	TRIAE_CS42_5BL_TGACv1_404454_AA1300370,TRIAE_CS42_U_TGACv1_643126_AA2127630,TRIAE_CS42_6BS_TGACv1_514208_AA1656950,TRIAE_CS42_1BL_TGACv1_030603_AA0095440,TRIAE_CS42_1BL_TGACv1_033509_AA0140020,TRIAE_CS42_1DL_TGACv1_061593_AA0199390,TRIAE_CS42_6AS_TGACv1_485824_AA1552850,TRIAE_CS42_6AS_TGACv1_485824_AA1552860,TRIAE_CS42_6BS_TGACv1_514208_AA1656990,TRIAE_CS42_6DS_TGACv1_543042_AA1734510,TRIAE_CS42_…
GO:0006261	DNA-dependent DNA replication	biological_process	6.7671e-07	1.9143e-05	13	1928	105	74606	TRIAE_CS42_1AS_TGACv1_019881_AA0072380,TRIAE_CS42_2BL_TGACv1_129976_AA0400820,TRIAE_CS42_1DL_TGACv1_061894_AA0205340,TRIAE_CS42_2DL_TGACv1_161360_AA0558180,TRIAE_CS42_5BL_TGACv1_405295_AA1324290,TRIAE_CS42_2AL_TGACv1_094809_AA0303420,TRIAE_CS42_U_TGACv1_643292_AA2130280,TRIAE_CS42_1DL_TGACv1_063075_AA0223620,TRIAE_CS42_5BS_TGACv1_423792_AA1383390,TRIAE_CS42_5BL_TGACv1_407263_AA1355000,TRIAE_CS42_…
GO:0005911	cell-cell junction	cellular_component	6.7777e-07	1.9143e-05	20	1928	244	74606	TRIAE_CS42_6BL_TGACv1_500942_AA1611930,TRIAE_CS42_4DL_TGACv1_342471_AA1114460,TRIAE_CS42_5DS_TGACv1_458693_AA1494370,TRIAE_CS42_2DL_TGACv1_161360_AA0558180,TRIAE_CS42_4BS_TGACv1_328586_AA1090550,TRIAE_CS42_1DL_TGACv1_061713_AA0202170,TRIAE_CS42_6DL_TGACv1_528145_AA1711960,TRIAE_CS42_4DS_TGACv1_361934_AA1174490,TRIAE_CS42_7BS_TGACv1_591976_AA1927160,TRIAE_CS42_2BL_TGACv1_129976_AA0400820,TRIAE_CS4…
GO:0009506	plasmodesma	cellular_component	6.7777e-07	1.9143e-05	20	1928	244	74606	TRIAE_CS42_2DL_TGACv1_161360_AA0558180,TRIAE_CS42_5DS_TGACv1_458693_AA1494370,TRIAE_CS42_4DL_TGACv1_342471_AA1114460,TRIAE_CS42_6BL_TGACv1_500942_AA1611930,TRIAE_CS42_4DS_TGACv1_361934_AA1174490,TRIAE_CS42_6DL_TGACv1_528145_AA1711960,TRIAE_CS42_1DL_TGACv1_061713_AA0202170,TRIAE_CS42_4BS_TGACv1_328586_AA1090550,TRIAE_CS42_7DS_TGACv1_623153_AA2050180,TRIAE_CS42_2DL_TGACv1_159965_AA0544980,TRIAE_CS4…
GO:0030054	cell junction	cellular_component	6.7777e-07	1.9143e-05	20	1928	244	74606	TRIAE_CS42_2DL_TGACv1_161360_AA0558180,TRIAE_CS42_5DS_TGACv1_458693_AA1494370,TRIAE_CS42_4DL_TGACv1_342471_AA1114460,TRIAE_CS42_6BL_TGACv1_500942_AA1611930,TRIAE_CS42_4DS_TGACv1_361934_AA1174490,TRIAE_CS42_6DL_TGACv1_528145_AA1711960,TRIAE_CS42_1DL_TGACv1_061713_AA0202170,TRIAE_CS42_4BS_TGACv1_328586_AA1090550,TRIAE_CS42_2DL_TGACv1_159965_AA0544980,TRIAE_CS42_7DS_TGACv1_623153_AA2050180,TRIAE_CS4…
GO:0055044	symplast	cellular_component	6.7777e-07	1.9143e-05	20	1928	244	74606	TRIAE_CS42_2DL_TGACv1_161143_AA0557040,TRIAE_CS42_2BL_TGACv1_129976_AA0400820,TRIAE_CS42_7BS_TGACv1_591976_AA1927160,TRIAE_CS42_2DL_TGACv1_159965_AA0544980,TRIAE_CS42_2AL_TGACv1_094809_AA0303420,TRIAE_CS42_7DS_TGACv1_623153_AA2050180,TRIAE_CS42_U_TGACv1_640854_AA2077410,TRIAE_CS42_1DL_TGACv1_061704_AA0201970,TRIAE_CS42_2AL_TGACv1_093096_AA0271930,TRIAE_CS42_6AL_TGACv1_473897_AA1533380,TRIAE_CS42_…
GO:0016746	transferase activity, transferring acyl groups	molecular_function	7.3124e-07	2.0567e-05	63	1928	1344	74606	TRIAE_CS42_7DS_TGACv1_623765_AA2056000,TRIAE_CS42_2AL_TGACv1_093085_AA0271650,TRIAE_CS42_3AS_TGACv1_212208_AA0698820,TRIAE_CS42_3B_TGACv1_221884_AA0752390,TRIAE_CS42_6AS_TGACv1_485778_AA1551950,TRIAE_CS42_5BL_TGACv1_404570_AA1304520,TRIAE_CS42_U_TGACv1_643054_AA2126680,TRIAE_CS42_5BL_TGACv1_404443_AA1299940,TRIAE_CS42_7AS_TGACv1_569074_AA1806510,TRIAE_CS42_5AL_TGACv1_378173_AA1251720,TRIAE_CS42_3…
GO:0008028	monocarboxylic acid transmembrane transporter activity	molecular_function	7.441e-07	2.0841e-05	5	1928	9	74606	TRIAE_CS42_3AS_TGACv1_212675_AA0702590,TRIAE_CS42_5BL_TGACv1_405907_AA1337450,TRIAE_CS42_3B_TGACv1_223199_AA0777850,TRIAE_CS42_5DL_TGACv1_432946_AA1395680,TRIAE_CS42_5AL_TGACv1_374188_AA1192880
GO:0044264	cellular polysaccharide metabolic process	biological_process	9.2411e-07	2.5775e-05	30	1928	482	74606	TRIAE_CS42_2AS_TGACv1_116387_AA0373890,TRIAE_CS42_2DL_TGACv1_159587_AA0540290,TRIAE_CS42_2BS_TGACv1_147826_AA0487990,TRIAE_CS42_2DS_TGACv1_180213_AA0610440,TRIAE_CS42_5DL_TGACv1_438060_AA1467880,TRIAE_CS42_1AL_TGACv1_000384_AA0010710,TRIAE_CS42_7DL_TGACv1_603134_AA1976600,TRIAE_CS42_4BS_TGACv1_328010_AA1080930,TRIAE_CS42_4AL_TGACv1_289959_AA0979560,TRIAE_CS42_1DL_TGACv1_062182_AA0210070,TRIAE_CS4…
GO:0009058	biosynthetic process	biological_process	9.4694e-07	2.6303e-05	362	1928	10911	74606	TRIAE_CS42_4DL_TGACv1_342972_AA1126540,TRIAE_CS42_3AL_TGACv1_193689_AA0617640,TRIAE_CS42_U_TGACv1_640995_AA2081800,TRIAE_CS42_7BL_TGACv1_580667_AA1914990,TRIAE_CS42_3DS_TGACv1_273096_AA0928280,TRIAE_CS42_2DL_TGACv1_159916_AA0544360,TRIAE_CS42_2DL_TGACv1_159200_AA0534260,TRIAE_CS42_5DL_TGACv1_435150_AA1446750,TRIAE_CS42_1BL_TGACv1_033273_AA0138330,TRIAE_CS42_U_TGACv1_654540_AA2150720,TRIAE_CS42_3D…
GO:0004312	fatty acid synthase activity	molecular_function	1.0468e-06	2.8956e-05	6	1928	16	74606	TRIAE_CS42_2AL_TGACv1_093558_AA0282560,TRIAE_CS42_4DL_TGACv1_343777_AA1139610,TRIAE_CS42_4AS_TGACv1_306673_AA1011900,TRIAE_CS42_2BL_TGACv1_129465_AA0384880,TRIAE_CS42_2DL_TGACv1_162478_AA0562870,TRIAE_CS42_U_TGACv1_643054_AA2126680
GO:0000096	sulfur amino acid metabolic process	biological_process	1.0857e-06	2.9911e-05	13	1928	103	74606	TRIAE_CS42_4BS_TGACv1_330819_AA1108930,TRIAE_CS42_4AL_TGACv1_290117_AA0981910,TRIAE_CS42_4DS_TGACv1_361983_AA1175310,TRIAE_CS42_5AS_TGACv1_393328_AA1271350,TRIAE_CS42_5BL_TGACv1_406345_AA1344380,TRIAE_CS42_4DL_TGACv1_343385_AA1133850,TRIAE_CS42_5AL_TGACv1_374680_AA1206310,TRIAE_CS42_5BS_TGACv1_423584_AA1379990,TRIAE_CS42_4BL_TGACv1_320349_AA1036310,TRIAE_CS42_7DS_TGACv1_624143_AA2059180,TRIAE_CS4…
GO:1901137	carbohydrate derivative biosynthetic process	biological_process	1.1457e-06	3.1435e-05	41	1928	730	74606	TRIAE_CS42_6AL_TGACv1_473897_AA1533380,TRIAE_CS42_6DL_TGACv1_526952_AA1695860,TRIAE_CS42_6DL_TGACv1_527865_AA1709380,TRIAE_CS42_1AL_TGACv1_000492_AA0013410,TRIAE_CS42_7AL_TGACv1_558796_AA1796130,TRIAE_CS42_6DS_TGACv1_543692_AA1743160,TRIAE_CS42_3AS_TGACv1_213440_AA0706960,TRIAE_CS42_3B_TGACv1_223441_AA0782230,TRIAE_CS42_1DL_TGACv1_062210_AA0210500,TRIAE_CS42_7BS_TGACv1_592783_AA1944260,TRIAE_CS42…
GO:0006575	cellular modified amino acid metabolic process	biological_process	1.1873e-06	3.2442e-05	16	1928	151	74606	TRIAE_CS42_2AL_TGACv1_094077_AA0292200,TRIAE_CS42_2AL_TGACv1_094077_AA0292210,TRIAE_CS42_5BL_TGACv1_406345_AA1344380,TRIAE_CS42_5AL_TGACv1_374680_AA1206310,TRIAE_CS42_3AS_TGACv1_213440_AA0706960,TRIAE_CS42_3B_TGACv1_223441_AA0782230,TRIAE_CS42_6BL_TGACv1_500297_AA1602810,TRIAE_CS42_3DS_TGACv1_274021_AA0934410,TRIAE_CS42_2DL_TGACv1_158777_AA0526010,TRIAE_CS42_2BL_TGACv1_129567_AA0388870,TRIAE_CS42…
GO:0008104	protein localization	biological_process	1.1977e-06	3.2594e-05	47	1928	871	74606	TRIAE_CS42_5AL_TGACv1_374122_AA1190950,TRIAE_CS42_5BL_TGACv1_408355_AA1362970,TRIAE_CS42_5AL_TGACv1_375095_AA1216020,TRIAE_CS42_4BL_TGACv1_321458_AA1060720,TRIAE_CS42_1BL_TGACv1_031076_AA0107250,TRIAE_CS42_6BS_TGACv1_514683_AA1663200,TRIAE_CS42_2AL_TGACv1_096831_AA0321630,TRIAE_CS42_5AL_TGACv1_374774_AA1208800,TRIAE_CS42_5BL_TGACv1_405597_AA1331170,TRIAE_CS42_7BS_TGACv1_593531_AA1952260,TRIAE_CS4…
GO:0043492	ATPase activity, coupled to movement of substances	molecular_function	1.4123e-06	3.8281e-05	24	1928	398	74606	TRIAE_CS42_3B_TGACv1_223754_AA0786670,TRIAE_CS42_2AL_TGACv1_093051_AA0270470,TRIAE_CS42_1BL_TGACv1_031047_AA0106660,TRIAE_CS42_2BL_TGACv1_129973_AA0400750,TRIAE_CS42_3DS_TGACv1_272258_AA0917870,TRIAE_CS42_7AS_TGACv1_569469_AA1816750,TRIAE_CS42_1DL_TGACv1_062210_AA0210500,TRIAE_CS42_7DL_TGACv1_603585_AA1986010,TRIAE_CS42_3B_TGACv1_221643_AA0746430,TRIAE_CS42_3DL_TGACv1_250717_AA0872310,TRIAE_CS42_…
GO:0046835	carbohydrate phosphorylation	biological_process	1.4962e-06	4.0391e-05	10	1928	66	74606	TRIAE_CS42_4AS_TGACv1_306645_AA1011430,TRIAE_CS42_7BS_TGACv1_592594_AA1941060,TRIAE_CS42_7AS_TGACv1_571836_AA1850200,TRIAE_CS42_4DL_TGACv1_343659_AA1137850,TRIAE_CS42_2DL_TGACv1_160680_AA0553060,TRIAE_CS42_2AL_TGACv1_093541_AA0282230,TRIAE_CS42_6AL_TGACv1_471645_AA1512290,TRIAE_CS42_7DS_TGACv1_622764_AA2045010,TRIAE_CS42_2BL_TGACv1_131119_AA0422830,TRIAE_CS42_4BL_TGACv1_320480_AA1040880
GO:0042626	ATPase activity, coupled to transmembrane movement of substances	molecular_function	1.7775e-06	4.7794e-05	23	1928	371	74606	TRIAE_CS42_3DS_TGACv1_273334_AA0930440,TRIAE_CS42_1BL_TGACv1_031692_AA0118950,TRIAE_CS42_7BL_TGACv1_576793_AA1855160,TRIAE_CS42_1AL_TGACv1_004040_AA0052320,TRIAE_CS42_3AS_TGACv1_211205_AA0686630,TRIAE_CS42_3DL_TGACv1_250717_AA0872310,TRIAE_CS42_3B_TGACv1_221643_AA0746430,TRIAE_CS42_3AL_TGACv1_193952_AA0623370,TRIAE_CS42_7AL_TGACv1_559344_AA1799200,TRIAE_CS42_7DL_TGACv1_603585_AA1986010,TRIAE_CS42…
GO:0005773	vacuole	cellular_component	1.7905e-06	4.795e-05	29	1928	436	74606	TRIAE_CS42_3DL_TGACv1_251447_AA0881600,TRIAE_CS42_3B_TGACv1_222072_AA0756730,TRIAE_CS42_U_TGACv1_642696_AA2121820,TRIAE_CS42_2AS_TGACv1_113349_AA0354840,TRIAE_CS42_4DL_TGACv1_342471_AA1114460,TRIAE_CS42_3DS_TGACv1_272832_AA0925630,TRIAE_CS42_7DL_TGACv1_603245_AA1979040,TRIAE_CS42_U_TGACv1_641240_AA2089370,TRIAE_CS42_7BS_TGACv1_592090_AA1930300,TRIAE_CS42_1DL_TGACv1_061713_AA0202170,TRIAE_CS42_4BS…
GO:2000012	regulation of auxin polar transport	biological_process	1.9588e-06	5.2249e-05	6	1928	15	74606	TRIAE_CS42_7BS_TGACv1_591976_AA1927160,TRIAE_CS42_U_TGACv1_640854_AA2077410,TRIAE_CS42_4BS_TGACv1_329163_AA1098380,TRIAE_CS42_7DS_TGACv1_623153_AA2050180,TRIAE_CS42_4AS_TGACv1_307317_AA1019370,TRIAE_CS42_4DL_TGACv1_342367_AA1111630
GO:0008237	metallopeptidase activity	molecular_function	2.0853e-06	5.5404e-05	21	1928	275	74606	TRIAE_CS42_3DL_TGACv1_251108_AA0877530,TRIAE_CS42_4BS_TGACv1_328833_AA1094200,TRIAE_CS42_3DL_TGACv1_249891_AA0858210,TRIAE_CS42_4DL_TGACv1_342605_AA1117760,TRIAE_CS42_3B_TGACv1_220888_AA0722660,TRIAE_CS42_4DL_TGACv1_342529_AA1115980,TRIAE_CS42_3B_TGACv1_222485_AA0765690,TRIAE_CS42_4AS_TGACv1_306711_AA1012310,TRIAE_CS42_3AL_TGACv1_194555_AA0635620,TRIAE_CS42_4BL_TGACv1_321498_AA1061400,TRIAE_CS42_…
GO:0009521	photosystem	cellular_component	2.1886e-06	5.792e-05	26	1928	256	74606	TRIAE_CS42_1BL_TGACv1_030603_AA0095440,TRIAE_CS42_1BL_TGACv1_033509_AA0140020,TRIAE_CS42_3DL_TGACv1_251681_AA0883770,TRIAE_CS42_6BS_TGACv1_514208_AA1656950,TRIAE_CS42_U_TGACv1_643126_AA2127630,TRIAE_CS42_5BL_TGACv1_404454_AA1300370,TRIAE_CS42_6BS_TGACv1_514208_AA1656990,TRIAE_CS42_6DS_TGACv1_543042_AA1734510,TRIAE_CS42_6AS_TGACv1_485824_AA1552850,TRIAE_CS42_6AS_TGACv1_485824_AA1552860,TRIAE_CS42_…
GO:0016820	hydrolase activity, acting on acid anhydrides, catalyzing transmembrane movement of substances	molecular_function	2.2787e-06	6.0068e-05	23	1928	373	74606	TRIAE_CS42_3B_TGACv1_223754_AA0786670,TRIAE_CS42_2AL_TGACv1_093051_AA0270470,TRIAE_CS42_1DL_TGACv1_062210_AA0210500,TRIAE_CS42_2BL_TGACv1_129973_AA0400750,TRIAE_CS42_7AS_TGACv1_569469_AA1816750,TRIAE_CS42_3DS_TGACv1_272258_AA0917870,TRIAE_CS42_3DS_TGACv1_273334_AA0930440,TRIAE_CS42_1BL_TGACv1_031692_AA0118950,TRIAE_CS42_1AL_TGACv1_004040_AA0052320,TRIAE_CS42_3AS_TGACv1_211205_AA0686630,TRIAE_CS42…
GO:0004177	aminopeptidase activity	molecular_function	2.3104e-06	6.0553e-05	10	1928	67	74606	TRIAE_CS42_4BS_TGACv1_328833_AA1094200,TRIAE_CS42_1DL_TGACv1_061968_AA0206620,TRIAE_CS42_6BS_TGACv1_513165_AA1632790,TRIAE_CS42_1BL_TGACv1_032099_AA0125390,TRIAE_CS42_4AL_TGACv1_289060_AA0964280,TRIAE_CS42_1DL_TGACv1_062495_AA0215350,TRIAE_CS42_4DL_TGACv1_342605_AA1117760,TRIAE_CS42_6AS_TGACv1_486130_AA1557260,TRIAE_CS42_1AL_TGACv1_001070_AA0024440,TRIAE_CS42_6AL_TGACv1_471730_AA1513500
GO:0030337	DNA polymerase processivity factor activity	molecular_function	2.3151e-06	6.0553e-05	5	1928	10	74606	TRIAE_CS42_2BL_TGACv1_131506_AA0428640,TRIAE_CS42_2DL_TGACv1_159200_AA0534260,TRIAE_CS42_4BL_TGACv1_321351_AA1059370,TRIAE_CS42_6DL_TGACv1_526389_AA1681790,TRIAE_CS42_2AL_TGACv1_096359_AA0318830
GO:0005982	starch metabolic process	biological_process	2.9075e-06	7.5752e-05	10	1928	73	74606	TRIAE_CS42_1BL_TGACv1_031136_AA0108420,TRIAE_CS42_1BL_TGACv1_031712_AA0119450,TRIAE_CS42_2AL_TGACv1_093163_AA0273760,TRIAE_CS42_1DL_TGACv1_062182_AA0210070,TRIAE_CS42_4DL_TGACv1_342433_AA1113510,TRIAE_CS42_1AL_TGACv1_000384_AA0010710,TRIAE_CS42_2BL_TGACv1_131614_AA0429850,TRIAE_CS42_5AL_TGACv1_379463_AA1256450,TRIAE_CS42_5AL_TGACv1_374631_AA1204970,TRIAE_CS42_2DL_TGACv1_159587_AA0540290
GO:0006270	DNA replication initiation	biological_process	2.966e-06	7.6977e-05	7	1928	33	74606	TRIAE_CS42_5BS_TGACv1_423792_AA1383390,TRIAE_CS42_5BL_TGACv1_407263_AA1355000,TRIAE_CS42_U_TGACv1_643292_AA2130280,TRIAE_CS42_1AS_TGACv1_019881_AA0072380,TRIAE_CS42_U_TGACv1_641839_AA2105360,TRIAE_CS42_5AS_TGACv1_393478_AA1272980,TRIAE_CS42_6DL_TGACv1_527835_AA1709090
GO:0005774	vacuolar membrane	cellular_component	2.9893e-06	7.6988e-05	21	1928	266	74606	TRIAE_CS42_3DL_TGACv1_250988_AA0875910,TRIAE_CS42_4AS_TGACv1_306406_AA1007690,TRIAE_CS42_2BL_TGACv1_131580_AA0429350,TRIAE_CS42_5DL_TGACv1_433800_AA1422410,TRIAE_CS42_U_TGACv1_641184_AA2087580,TRIAE_CS42_5DL_TGACv1_436184_AA1459030,TRIAE_CS42_2DL_TGACv1_158421_AA0518370,TRIAE_CS42_2DL_TGACv1_159965_AA0544980,TRIAE_CS42_3AL_TGACv1_197715_AA0667040,TRIAE_CS42_1DL_TGACv1_061704_AA0201970,TRIAE_CS42_…
GO:0044437	vacuolar part	cellular_component	2.9893e-06	7.6988e-05	21	1928	266	74606	TRIAE_CS42_1BS_TGACv1_049652_AA0158940,TRIAE_CS42_4BS_TGACv1_328586_AA1090550,TRIAE_CS42_U_TGACv1_641240_AA2089370,TRIAE_CS42_3DS_TGACv1_272832_AA0925630,TRIAE_CS42_4DL_TGACv1_342471_AA1114460,TRIAE_CS42_3B_TGACv1_222072_AA0756730,TRIAE_CS42_U_TGACv1_642696_AA2121820,TRIAE_CS42_4AS_TGACv1_306406_AA1007690,TRIAE_CS42_3DL_TGACv1_250988_AA0875910,TRIAE_CS42_5DL_TGACv1_433800_AA1422410,TRIAE_CS42_2BL…
GO:0009066	aspartate family amino acid metabolic process	biological_process	3.2246e-06	8.2731e-05	12	1928	95	74606	TRIAE_CS42_5AL_TGACv1_374680_AA1206310,TRIAE_CS42_5BL_TGACv1_406345_AA1344380,TRIAE_CS42_4DL_TGACv1_343385_AA1133850,TRIAE_CS42_5AS_TGACv1_393328_AA1271350,TRIAE_CS42_4BS_TGACv1_330819_AA1108930,TRIAE_CS42_4AL_TGACv1_290117_AA0981910,TRIAE_CS42_4DS_TGACv1_361983_AA1175310,TRIAE_CS42_5DS_TGACv1_456564_AA1474130,TRIAE_CS42_4AS_TGACv1_307275_AA1019080,TRIAE_CS42_5BS_TGACv1_423584_AA1379990,TRIAE_CS4…
GO:0048278	vesicle docking	biological_process	3.3614e-06	8.5692e-05	8	1928	43	74606	TRIAE_CS42_5AS_TGACv1_394157_AA1278470,TRIAE_CS42_6BL_TGACv1_500073_AA1598210,TRIAE_CS42_6BL_TGACv1_499660_AA1588490,TRIAE_CS42_5AS_TGACv1_394157_AA1278420,TRIAE_CS42_6DL_TGACv1_526657_AA1689120,TRIAE_CS42_6BL_TGACv1_500073_AA1598240,TRIAE_CS42_5BS_TGACv1_424367_AA1389100,TRIAE_CS42_6AL_TGACv1_471366_AA1507720
GO:0005829	cytosol	cellular_component	3.3655e-06	8.5692e-05	42	1928	773	74606	TRIAE_CS42_2DL_TGACv1_158421_AA0518370,TRIAE_CS42_7DS_TGACv1_623153_AA2050180,TRIAE_CS42_3DS_TGACv1_272144_AA0915590,TRIAE_CS42_U_TGACv1_640854_AA2077410,TRIAE_CS42_1DL_TGACv1_061704_AA0201970,TRIAE_CS42_4AS_TGACv1_306711_AA1012310,TRIAE_CS42_4DL_TGACv1_342529_AA1115980,TRIAE_CS42_1AL_TGACv1_001070_AA0024440,TRIAE_CS42_7AS_TGACv1_569808_AA1824460,TRIAE_CS42_2DL_TGACv1_161143_AA0557040,TRIAE_CS42_…
GO:0006091	generation of precursor metabolites and energy	biological_process	3.6741e-06	9.3198e-05	66	1928	1176	74606	TRIAE_CS42_2AS_TGACv1_112739_AA0344340,TRIAE_CS42_2DL_TGACv1_159084_AA0532060,TRIAE_CS42_2DS_TGACv1_177436_AA0577070,TRIAE_CS42_6AL_TGACv1_471645_AA1512290,TRIAE_CS42_1AL_TGACv1_000755_AA0018450,TRIAE_CS42_6BS_TGACv1_514208_AA1656990,TRIAE_CS42_6DS_TGACv1_543042_AA1734510,TRIAE_CS42_6AS_TGACv1_485824_AA1552860,TRIAE_CS42_6AS_TGACv1_485824_AA1552850,TRIAE_CS42_6BL_TGACv1_501539_AA1618480,TRIAE_CS4…
GO:0051017	actin filament bundle assembly	biological_process	3.7934e-06	9.5502e-05	6	1928	23	74606	TRIAE_CS42_5DS_TGACv1_457254_AA1484340,TRIAE_CS42_3DS_TGACv1_271667_AA0905120,TRIAE_CS42_4BS_TGACv1_329163_AA1098380,TRIAE_CS42_4DL_TGACv1_342367_AA1111630,TRIAE_CS42_3AL_TGACv1_194824_AA0640140,TRIAE_CS42_4AS_TGACv1_307317_AA1019370
GO:0061572	actin filament bundle organization	biological_process	3.7934e-06	9.5502e-05	6	1928	23	74606	TRIAE_CS42_3AL_TGACv1_194824_AA0640140,TRIAE_CS42_4AS_TGACv1_307317_AA1019370,TRIAE_CS42_4DL_TGACv1_342367_AA1111630,TRIAE_CS42_5DS_TGACv1_457254_AA1484340,TRIAE_CS42_3DS_TGACv1_271667_AA0905120,TRIAE_CS42_4BS_TGACv1_329163_AA1098380
GO:0051049	regulation of transport	biological_process	3.8288e-06	9.6034e-05	10	1928	69	74606	TRIAE_CS42_4DL_TGACv1_342367_AA1111630,TRIAE_CS42_3DL_TGACv1_250988_AA0875910,TRIAE_CS42_4AS_TGACv1_307317_AA1019370,TRIAE_CS42_3DL_TGACv1_249213_AA0841560,TRIAE_CS42_7DS_TGACv1_623153_AA2050180,TRIAE_CS42_3AL_TGACv1_197715_AA0667040,TRIAE_CS42_U_TGACv1_640854_AA2077410,TRIAE_CS42_4BS_TGACv1_329163_AA1098380,TRIAE_CS42_3B_TGACv1_222072_AA0756730,TRIAE_CS42_7BS_TGACv1_591976_AA1927160
GO:0032432	actin filament bundle	cellular_component	4.1588e-06	0.00010354	3	1928	3	74606	TRIAE_CS42_4BS_TGACv1_329163_AA1098380,TRIAE_CS42_4DL_TGACv1_342367_AA1111630,TRIAE_CS42_4AS_TGACv1_307317_AA1019370
GO:0051014	actin filament severing	biological_process	4.1588e-06	0.00010354	3	1928	3	74606	TRIAE_CS42_4AS_TGACv1_307317_AA1019370,TRIAE_CS42_4DL_TGACv1_342367_AA1111630,TRIAE_CS42_4BS_TGACv1_329163_AA1098380
GO:0000097	sulfur amino acid biosynthetic process	biological_process	4.4039e-06	0.00010924	11	1928	81	74606	TRIAE_CS42_4DS_TGACv1_361983_AA1175310,TRIAE_CS42_4BS_TGACv1_330819_AA1108930,TRIAE_CS42_4AL_TGACv1_290117_AA0981910,TRIAE_CS42_5AS_TGACv1_393328_AA1271350,TRIAE_CS42_4DL_TGACv1_343385_AA1133850,TRIAE_CS42_7DS_TGACv1_624143_AA2059180,TRIAE_CS42_4BL_TGACv1_320349_AA1036310,TRIAE_CS42_5BS_TGACv1_423584_AA1379990,TRIAE_CS42_4AS_TGACv1_307275_AA1019080,TRIAE_CS42_5DS_TGACv1_456564_AA1474130,TRIAE_CS4…
GO:0044431	Golgi apparatus part	cellular_component	4.5598e-06	0.00011269	27	1928	448	74606	TRIAE_CS42_7AS_TGACv1_571321_AA1846800,TRIAE_CS42_7AS_TGACv1_571423_AA1847600,TRIAE_CS42_6DS_TGACv1_542583_AA1724790,TRIAE_CS42_7AL_TGACv1_556695_AA1769100,TRIAE_CS42_4BL_TGACv1_320261_AA1032800,TRIAE_CS42_6AS_TGACv1_486272_AA1559050,TRIAE_CS42_5DS_TGACv1_458693_AA1494370,TRIAE_CS42_1DL_TGACv1_061297_AA0191640,TRIAE_CS42_7DL_TGACv1_602635_AA1963430,TRIAE_CS42_U_TGACv1_641043_AA2083140,TRIAE_CS42_…
GO:0009226	nucleotide-sugar biosynthetic process	biological_process	5.0114e-06	0.00012339	7	1928	30	74606	TRIAE_CS42_6DL_TGACv1_527865_AA1709380,TRIAE_CS42_7BL_TGACv1_578013_AA1887930,TRIAE_CS42_7DL_TGACv1_603622_AA1986410,TRIAE_CS42_7AL_TGACv1_558796_AA1796130,TRIAE_CS42_6AL_TGACv1_473897_AA1533380,TRIAE_CS42_6DL_TGACv1_528145_AA1711960,TRIAE_CS42_3AS_TGACv1_211158_AA0686190
GO:0019318	hexose metabolic process	biological_process	5.0447e-06	0.00012376	19	1928	248	74606	TRIAE_CS42_2AS_TGACv1_112396_AA0337300,TRIAE_CS42_4DL_TGACv1_343659_AA1137850,TRIAE_CS42_1DS_TGACv1_080723_AA0252750,TRIAE_CS42_4AS_TGACv1_306645_AA1011430,TRIAE_CS42_4BL_TGACv1_321135_AA1056010,TRIAE_CS42_6BS_TGACv1_515835_AA1672680,TRIAE_CS42_4DS_TGACv1_362203_AA1177750,TRIAE_CS42_4BL_TGACv1_320480_AA1040880,TRIAE_CS42_6DS_TGACv1_542766_AA1729850,TRIAE_CS42_6AS_TGACv1_487743_AA1572700,TRIAE_CS4…
GO:0030658	transport vesicle membrane	cellular_component	5.255e-06	0.00012845	11	1928	84	74606	TRIAE_CS42_6AL_TGACv1_471165_AA1503930,TRIAE_CS42_7DL_TGACv1_602635_AA1963430,TRIAE_CS42_4AL_TGACv1_288747_AA0957130,TRIAE_CS42_7AL_TGACv1_556695_AA1769100,TRIAE_CS42_4BL_TGACv1_320261_AA1032800,TRIAE_CS42_2DL_TGACv1_158815_AA0526570,TRIAE_CS42_4BS_TGACv1_328452_AA1088030,TRIAE_CS42_U_TGACv1_642388_AA2116800,TRIAE_CS42_4DS_TGACv1_361471_AA1168550,TRIAE_CS42_4DS_TGACv1_362497_AA1180110,TRIAE_CS42_…
GO:0006002	fructose 6-phosphate metabolic process	biological_process	6.2391e-06	0.00015195	7	1928	33	74606	TRIAE_CS42_7AS_TGACv1_571836_AA1850200,TRIAE_CS42_6AL_TGACv1_471645_AA1512290,TRIAE_CS42_7BS_TGACv1_592594_AA1941060,TRIAE_CS42_7DS_TGACv1_622764_AA2045010,TRIAE_CS42_1DL_TGACv1_063603_AA0229020,TRIAE_CS42_7AS_TGACv1_570780_AA1840810,TRIAE_CS42_1AL_TGACv1_000755_AA0018450
GO:0042623	ATPase activity, coupled	molecular_function	6.6963e-06	0.0001625	29	1928	574	74606	TRIAE_CS42_1BL_TGACv1_031047_AA0106660,TRIAE_CS42_3B_TGACv1_223754_AA0786670,TRIAE_CS42_2AL_TGACv1_093051_AA0270470,TRIAE_CS42_1DL_TGACv1_062210_AA0210500,TRIAE_CS42_7AS_TGACv1_569469_AA1816750,TRIAE_CS42_3DS_TGACv1_272258_AA0917870,TRIAE_CS42_2BL_TGACv1_129973_AA0400750,TRIAE_CS42_2DS_TGACv1_179778_AA0609130,TRIAE_CS42_7BL_TGACv1_576793_AA1855160,TRIAE_CS42_3AS_TGACv1_211205_AA0686630,TRIAE_CS42…
GO:0009628	response to abiotic stimulus	biological_process	6.8e-06	0.00016442	51	1928	1039	74606	TRIAE_CS42_2BL_TGACv1_131489_AA0428400,TRIAE_CS42_2BL_TGACv1_131580_AA0429350,TRIAE_CS42_2AL_TGACv1_093096_AA0271930,TRIAE_CS42_3B_TGACv1_222825_AA0771410,TRIAE_CS42_6AL_TGACv1_471582_AA1511400,TRIAE_CS42_7AL_TGACv1_556972_AA1774460,TRIAE_CS42_3DL_TGACv1_250988_AA0875910,TRIAE_CS42_4DL_TGACv1_342367_AA1111630,TRIAE_CS42_U_TGACv1_644248_AA2138300,TRIAE_CS42_7BS_TGACv1_592026_AA1928570,TRIAE_CS42_1…
GO:0010028	xanthophyll cycle	biological_process	7.3406e-06	0.00017436	3	1928	3	74606	TRIAE_CS42_4AL_TGACv1_289623_AA0974220,TRIAE_CS42_4BS_TGACv1_329699_AA1103360,TRIAE_CS42_4DS_TGACv1_361391_AA1166860
GO:0015229	L-ascorbic acid transporter activity	molecular_function	7.3406e-06	0.00017436	3	1928	3	74606	TRIAE_CS42_4BS_TGACv1_329699_AA1103360,TRIAE_CS42_4DS_TGACv1_361391_AA1166860,TRIAE_CS42_4AL_TGACv1_289623_AA0974220
GO:0015882	L-ascorbic acid transport	biological_process	7.3406e-06	0.00017436	3	1928	3	74606	TRIAE_CS42_4BS_TGACv1_329699_AA1103360,TRIAE_CS42_4DS_TGACv1_361391_AA1166860,TRIAE_CS42_4AL_TGACv1_289623_AA0974220
GO:0051180	vitamin transport	biological_process	7.3406e-06	0.00017436	3	1928	3	74606	TRIAE_CS42_4AL_TGACv1_289623_AA0974220,TRIAE_CS42_4BS_TGACv1_329699_AA1103360,TRIAE_CS42_4DS_TGACv1_361391_AA1166860
GO:0051183	vitamin transporter activity	molecular_function	7.3406e-06	0.00017436	3	1928	3	74606	TRIAE_CS42_4AL_TGACv1_289623_AA0974220,TRIAE_CS42_4DS_TGACv1_361391_AA1166860,TRIAE_CS42_4BS_TGACv1_329699_AA1103360
GO:0034637	cellular carbohydrate biosynthetic process	biological_process	7.7828e-06	0.00018203	21	1928	333	74606	TRIAE_CS42_2AL_TGACv1_093044_AA0270150,TRIAE_CS42_1DL_TGACv1_062182_AA0210070,TRIAE_CS42_4BS_TGACv1_328010_AA1080930,TRIAE_CS42_4AL_TGACv1_289959_AA0979560,TRIAE_CS42_1DL_TGACv1_061317_AA0192320,TRIAE_CS42_2DS_TGACv1_180213_AA0610440,TRIAE_CS42_2BS_TGACv1_147826_AA0487990,TRIAE_CS42_2DL_TGACv1_159587_AA0540290,TRIAE_CS42_4AL_TGACv1_288528_AA0951160,TRIAE_CS42_1AL_TGACv1_000384_AA0010710,TRIAE_CS4…
GO:0004742	dihydrolipoyllysine-residue acetyltransferase activity	molecular_function	7.7989e-06	0.00018203	4	1928	7	74606	TRIAE_CS42_6BS_TGACv1_514091_AA1654910,TRIAE_CS42_6AS_TGACv1_486115_AA1557000,TRIAE_CS42_4AL_TGACv1_292578_AA0999200,TRIAE_CS42_6DS_TGACv1_544326_AA1747750
GO:0016418	S-acetyltransferase activity	molecular_function	7.7989e-06	0.00018203	4	1928	7	74606	TRIAE_CS42_6DS_TGACv1_544326_AA1747750,TRIAE_CS42_4AL_TGACv1_292578_AA0999200,TRIAE_CS42_6AS_TGACv1_486115_AA1557000,TRIAE_CS42_6BS_TGACv1_514091_AA1654910
GO:0030523	dihydrolipoamide S-acyltransferase activity	molecular_function	7.7989e-06	0.00018203	4	1928	7	74606	TRIAE_CS42_6BS_TGACv1_514091_AA1654910,TRIAE_CS42_6DS_TGACv1_544326_AA1747750,TRIAE_CS42_4AL_TGACv1_292578_AA0999200,TRIAE_CS42_6AS_TGACv1_486115_AA1557000
GO:0045254	pyruvate dehydrogenase complex	cellular_component	7.7989e-06	0.00018203	4	1928	7	74606	TRIAE_CS42_6AS_TGACv1_486115_AA1557000,TRIAE_CS42_4AL_TGACv1_292578_AA0999200,TRIAE_CS42_6DS_TGACv1_544326_AA1747750,TRIAE_CS42_6BS_TGACv1_514091_AA1654910
GO:0046173	polyol biosynthetic process	biological_process	7.9585e-06	0.00018511	6	1928	21	74606	TRIAE_CS42_7DL_TGACv1_603779_AA1989110,TRIAE_CS42_4BS_TGACv1_328490_AA1088680,TRIAE_CS42_7AL_TGACv1_556888_AA1772870,TRIAE_CS42_5AL_TGACv1_376140_AA1232710,TRIAE_CS42_5DL_TGACv1_433402_AA1412060,TRIAE_CS42_4AL_TGACv1_288528_AA0951160
GO:0035999	tetrahydrofolate interconversion	biological_process	8.0975e-06	0.00018769	5	1928	14	74606	TRIAE_CS42_2DL_TGACv1_159916_AA0544360,TRIAE_CS42_5BL_TGACv1_406345_AA1344380,TRIAE_CS42_2BL_TGACv1_129567_AA0388870,TRIAE_CS42_5AL_TGACv1_374680_AA1206310,TRIAE_CS42_2AL_TGACv1_094077_AA0292210
GO:0032879	regulation of localization	biological_process	8.3775e-06	0.00019352	10	1928	74	74606	TRIAE_CS42_3DL_TGACv1_250988_AA0875910,TRIAE_CS42_4DL_TGACv1_342367_AA1111630,TRIAE_CS42_4AS_TGACv1_307317_AA1019370,TRIAE_CS42_3DL_TGACv1_249213_AA0841560,TRIAE_CS42_7DS_TGACv1_623153_AA2050180,TRIAE_CS42_3AL_TGACv1_197715_AA0667040,TRIAE_CS42_U_TGACv1_640854_AA2077410,TRIAE_CS42_4BS_TGACv1_329163_AA1098380,TRIAE_CS42_3B_TGACv1_222072_AA0756730,TRIAE_CS42_7BS_TGACv1_591976_AA1927160
GO:0009534	chloroplast thylakoid	cellular_component	8.6458e-06	0.00019835	37	1928	523	74606	TRIAE_CS42_1BL_TGACv1_030603_AA0095440,TRIAE_CS42_1BL_TGACv1_033509_AA0140020,TRIAE_CS42_U_TGACv1_643126_AA2127630,TRIAE_CS42_3AS_TGACv1_210574_AA0675360,TRIAE_CS42_5BL_TGACv1_404454_AA1300370,TRIAE_CS42_6BS_TGACv1_514208_AA1656950,AIG90477,TRIAE_CS42_7AL_TGACv1_557134_AA1777250,TRIAE_CS42_2AL_TGACv1_094054_AA0291710,TRIAE_CS42_5BL_TGACv1_405241_AA1323080,TRIAE_CS42_1AL_TGACv1_000383_AA0010660,TR…
GO:0031976	plastid thylakoid	cellular_component	8.6458e-06	0.00019835	37	1928	523	74606	TRIAE_CS42_6BS_TGACv1_514208_AA1656950,TRIAE_CS42_5BL_TGACv1_404454_AA1300370,TRIAE_CS42_U_TGACv1_643126_AA2127630,TRIAE_CS42_3AS_TGACv1_210574_AA0675360,TRIAE_CS42_1BL_TGACv1_030603_AA0095440,TRIAE_CS42_1BL_TGACv1_033509_AA0140020,TRIAE_CS42_2AL_TGACv1_094054_AA0291710,TRIAE_CS42_7AL_TGACv1_557134_AA1777250,AIG90477,TRIAE_CS42_1AL_TGACv1_009365_AA0055660,TRIAE_CS42_3DS_TGACv1_272293_AA0918520,TR…
GO:1901677	phosphate transmembrane transporter activity	molecular_function	8.7366e-06	0.00019975	11	1928	89	74606	TRIAE_CS42_5DL_TGACv1_432946_AA1395680,TRIAE_CS42_5BL_TGACv1_405907_AA1337450,TRIAE_CS42_3B_TGACv1_223199_AA0777850,TRIAE_CS42_4AL_TGACv1_289623_AA0974220,TRIAE_CS42_4BS_TGACv1_329699_AA1103360,TRIAE_CS42_4DS_TGACv1_361391_AA1166860,TRIAE_CS42_3AS_TGACv1_210574_AA0675360,TRIAE_CS42_2BL_TGACv1_129391_AA0381430,TRIAE_CS42_3DS_TGACv1_272293_AA0918520,TRIAE_CS42_5AL_TGACv1_374188_AA1192880,TRIAE_CS42…
GO:0009260	ribonucleotide biosynthetic process	biological_process	8.9099e-06	0.00020234	18	1928	203	74606	TRIAE_CS42_2DL_TGACv1_158421_AA0518370,TRIAE_CS42_1DL_TGACv1_062210_AA0210500,TRIAE_CS42_1DL_TGACv1_063573_AA0228750,TRIAE_CS42_6AL_TGACv1_473321_AA1530120,TRIAE_CS42_6DL_TGACv1_526952_AA1695860,TRIAE_CS42_1AL_TGACv1_000492_AA0013410,TRIAE_CS42_3DL_TGACv1_249279_AA0843940,TRIAE_CS42_5DL_TGACv1_435540_AA1451810,TRIAE_CS42_1BL_TGACv1_030377_AA0088540,TRIAE_CS42_1DL_TGACv1_061176_AA0187850,TRIAE_CS4…
GO:0046390	ribose phosphate biosynthetic process	biological_process	8.9099e-06	0.00020234	18	1928	203	74606	TRIAE_CS42_6BL_TGACv1_499360_AA1579440,TRIAE_CS42_5BL_TGACv1_406155_AA1341460,TRIAE_CS42_1AL_TGACv1_000512_AA0013610,TRIAE_CS42_1BL_TGACv1_031692_AA0118950,TRIAE_CS42_3B_TGACv1_223258_AA0779170,TRIAE_CS42_1AL_TGACv1_004040_AA0052320,TRIAE_CS42_3AL_TGACv1_194109_AA0626660,TRIAE_CS42_3DL_TGACv1_249279_AA0843940,TRIAE_CS42_5DL_TGACv1_435540_AA1451810,TRIAE_CS42_1BL_TGACv1_030377_AA0088540,TRIAE_CS42…
GO:0030132	clathrin coat of coated pit	cellular_component	9.1538e-06	0.00020718	5	1928	14	74606	TRIAE_CS42_4DS_TGACv1_362497_AA1180110,TRIAE_CS42_7AL_TGACv1_556695_AA1769100,TRIAE_CS42_7DL_TGACv1_602635_AA1963430,TRIAE_CS42_4BS_TGACv1_328452_AA1088030,TRIAE_CS42_4AL_TGACv1_288747_AA0957130
GO:0005662	DNA replication factor A complex	cellular_component	9.4466e-06	0.00021309	3	1928	3	74606	TRIAE_CS42_4BL_TGACv1_321871_AA1066490,TRIAE_CS42_4AS_TGACv1_306214_AA1004350,TRIAE_CS42_4DL_TGACv1_342972_AA1126540
GO:0010112	regulation of systemic acquired resistance	biological_process	9.8515e-06	0.00021813	6	1928	17	74606	TRIAE_CS42_1BL_TGACv1_034437_AA0144510,TRIAE_CS42_3B_TGACv1_229631_AA0828970,TRIAE_CS42_1BL_TGACv1_032262_AA0127620,TRIAE_CS42_1DL_TGACv1_061262_AA0190390,TRIAE_CS42_1DL_TGACv1_062962_AA0222290,TRIAE_CS42_1AL_TGACv1_002619_AA0043740
GO:0016830	carbon-carbon lyase activity	molecular_function	9.8683e-06	0.00021813	22	1928	296	74606	TRIAE_CS42_7BS_TGACv1_592026_AA1928570,TRIAE_CS42_7AS_TGACv1_571185_AA1845550,TRIAE_CS42_7DS_TGACv1_622043_AA2031500,TRIAE_CS42_2AL_TGACv1_094627_AA0300840,TRIAE_CS42_3B_TGACv1_222610_AA0767770,TRIAE_CS42_7BL_TGACv1_580875_AA1915830,TRIAE_CS42_3B_TGACv1_221609_AA0745810,TRIAE_CS42_3DL_TGACv1_251713_AA0884060,TRIAE_CS42_3DL_TGACv1_249127_AA0838760,TRIAE_CS42_7DS_TGACv1_624510_AA2061770,TRIAE_CS42_…
GO:0043101	purine-containing compound salvage	biological_process	9.9059e-06	0.00021813	6	1928	20	74606	TRIAE_CS42_6DL_TGACv1_528171_AA1712170,TRIAE_CS42_6BL_TGACv1_499716_AA1589820,TRIAE_CS42_6AL_TGACv1_472192_AA1519000,TRIAE_CS42_6DL_TGACv1_526952_AA1695860,TRIAE_CS42_6AL_TGACv1_473321_AA1530120,TRIAE_CS42_6BL_TGACv1_499360_AA1579440
GO:0032069	regulation of nuclease activity	biological_process	9.9623e-06	0.00021813	3	1928	3	74606	TRIAE_CS42_4AS_TGACv1_306406_AA1007690,TRIAE_CS42_4BL_TGACv1_321702_AA1064290,TRIAE_CS42_4DL_TGACv1_343812_AA1140000
GO:0032074	negative regulation of nuclease activity	biological_process	9.9623e-06	0.00021813	3	1928	3	74606	TRIAE_CS42_4BL_TGACv1_321702_AA1064290,TRIAE_CS42_4DL_TGACv1_343812_AA1140000,TRIAE_CS42_4AS_TGACv1_306406_AA1007690
GO:0060700	regulation of ribonuclease activity	biological_process	9.9623e-06	0.00021813	3	1928	3	74606	TRIAE_CS42_4DL_TGACv1_343812_AA1140000,TRIAE_CS42_4BL_TGACv1_321702_AA1064290,TRIAE_CS42_4AS_TGACv1_306406_AA1007690
GO:0060701	negative regulation of ribonuclease activity	biological_process	9.9623e-06	0.00021813	3	1928	3	74606	TRIAE_CS42_4AS_TGACv1_306406_AA1007690,TRIAE_CS42_4BL_TGACv1_321702_AA1064290,TRIAE_CS42_4DL_TGACv1_343812_AA1140000
GO:1901917	regulation of exoribonuclease activity	biological_process	9.9623e-06	0.00021813	3	1928	3	74606	TRIAE_CS42_4AS_TGACv1_306406_AA1007690,TRIAE_CS42_4DL_TGACv1_343812_AA1140000,TRIAE_CS42_4BL_TGACv1_321702_AA1064290
GO:1901918	negative regulation of exoribonuclease activity	biological_process	9.9623e-06	0.00021813	3	1928	3	74606	TRIAE_CS42_4DL_TGACv1_343812_AA1140000,TRIAE_CS42_4BL_TGACv1_321702_AA1064290,TRIAE_CS42_4AS_TGACv1_306406_AA1007690
GO:0030133	transport vesicle	cellular_component	1.0174e-05	0.00022205	11	1928	91	74606	TRIAE_CS42_4BS_TGACv1_328452_AA1088030,TRIAE_CS42_2DL_TGACv1_158815_AA0526570,TRIAE_CS42_U_TGACv1_642388_AA2116800,TRIAE_CS42_4DS_TGACv1_361471_AA1168550,TRIAE_CS42_2BL_TGACv1_131305_AA0425720,TRIAE_CS42_4DS_TGACv1_362497_AA1180110,TRIAE_CS42_6AL_TGACv1_471165_AA1503930,TRIAE_CS42_7DL_TGACv1_602635_AA1963430,TRIAE_CS42_4AL_TGACv1_288747_AA0957130,TRIAE_CS42_7AL_TGACv1_556695_AA1769100,TRIAE_CS42_…
GO:0019419	sulfate reduction	biological_process	1.0761e-05	0.0002341	3	1928	3	74606	TRIAE_CS42_2BS_TGACv1_145868_AA0447700,TRIAE_CS42_2DS_TGACv1_177565_AA0580190,TRIAE_CS42_2AS_TGACv1_112241_AA0333980
GO:0004001	adenosine kinase activity	molecular_function	1.1564e-05	0.00025075	3	1928	3	74606	TRIAE_CS42_6BL_TGACv1_499360_AA1579440,TRIAE_CS42_6AL_TGACv1_473321_AA1530120,TRIAE_CS42_6DL_TGACv1_526952_AA1695860
GO:0009670	triose-phosphate:phosphate antiporter activity	molecular_function	1.1767e-05	0.00025294	3	1928	3	74606	TRIAE_CS42_5BL_TGACv1_405907_AA1337450,TRIAE_CS42_5AL_TGACv1_374188_AA1192880,TRIAE_CS42_5DL_TGACv1_432946_AA1395680
GO:0009606	tropism	biological_process	1.1772e-05	0.00025294	7	1928	40	74606	TRIAE_CS42_4AS_TGACv1_307317_AA1019370,TRIAE_CS42_4DS_TGACv1_361424_AA1167750,TRIAE_CS42_U_TGACv1_643904_AA2135890,TRIAE_CS42_4DL_TGACv1_342367_AA1111630,TRIAE_CS42_4BS_TGACv1_330248_AA1106770,TRIAE_CS42_4BS_TGACv1_329163_AA1098380,TRIAE_CS42_4AL_TGACv1_289938_AA0979140
GO:0016051	carbohydrate biosynthetic process	biological_process	1.1778e-05	0.00025294	25	1928	439	74606	TRIAE_CS42_1BL_TGACv1_031136_AA0108420,TRIAE_CS42_4AL_TGACv1_288429_AA0948580,TRIAE_CS42_4BS_TGACv1_329796_AA1104090,TRIAE_CS42_1BL_TGACv1_031712_AA0119450,TRIAE_CS42_2AL_TGACv1_093163_AA0273760,TRIAE_CS42_4DS_TGACv1_361657_AA1171120,TRIAE_CS42_4BS_TGACv1_328490_AA1088680,TRIAE_CS42_2DL_TGACv1_161143_AA0557040,TRIAE_CS42_2BL_TGACv1_131614_AA0429850,TRIAE_CS42_1AL_TGACv1_001119_AA0025400,TRIAE_CS4…
GO:0006063	uronic acid metabolic process	biological_process	1.2289e-05	0.0002606	3	1928	3	74606	TRIAE_CS42_2DL_TGACv1_160680_AA0553060,TRIAE_CS42_2BL_TGACv1_131119_AA0422830,TRIAE_CS42_2AL_TGACv1_093541_AA0282230
GO:0019586	galacturonate metabolic process	biological_process	1.2289e-05	0.0002606	3	1928	3	74606	TRIAE_CS42_2DL_TGACv1_160680_AA0553060,TRIAE_CS42_2AL_TGACv1_093541_AA0282230,TRIAE_CS42_2BL_TGACv1_131119_AA0422830
GO:0046396	D-galacturonate metabolic process	biological_process	1.2289e-05	0.0002606	3	1928	3	74606	TRIAE_CS42_2DL_TGACv1_160680_AA0553060,TRIAE_CS42_2AL_TGACv1_093541_AA0282230,TRIAE_CS42_2BL_TGACv1_131119_AA0422830
GO:0047912	galacturonokinase activity	molecular_function	1.2289e-05	0.0002606	3	1928	3	74606	TRIAE_CS42_2AL_TGACv1_093541_AA0282230,TRIAE_CS42_2BL_TGACv1_131119_AA0422830,TRIAE_CS42_2DL_TGACv1_160680_AA0553060
GO:0010176	homogentisate phytyltransferase activity	molecular_function	1.2557e-05	0.00026543	3	1928	3	74606	TRIAE_CS42_7AL_TGACv1_559693_AA1800520,TRIAE_CS42_7DL_TGACv1_604116_AA1994020,TRIAE_CS42_7BL_TGACv1_577849_AA1884560
GO:0003924	GTPase activity	molecular_function	1.2666e-05	0.0002669	28	1928	441	74606	TRIAE_CS42_3DL_TGACv1_251720_AA0884160,TRIAE_CS42_2BS_TGACv1_146038_AA0453790,TRIAE_CS42_1AS_TGACv1_019520_AA0067630,TRIAE_CS42_6BS_TGACv1_513186_AA1633440,TRIAE_CS42_4DS_TGACv1_361934_AA1174490,TRIAE_CS42_5BL_TGACv1_406685_AA1348600,TRIAE_CS42_5DL_TGACv1_433411_AA1412390,TRIAE_CS42_3B_TGACv1_222072_AA0756730,TRIAE_CS42_1DL_TGACv1_061057_AA0183360,TRIAE_CS42_6DS_TGACv1_542706_AA1728340,TRIAE_CS42…
GO:0042439	ethanolamine-containing compound metabolic process	biological_process	1.316e-05	0.00027558	8	1928	55	74606	TRIAE_CS42_3DL_TGACv1_254806_AA0896680,TRIAE_CS42_3B_TGACv1_222617_AA0767980,TRIAE_CS42_1DL_TGACv1_062419_AA0214280,TRIAE_CS42_1DL_TGACv1_063094_AA0223830,TRIAE_CS42_3AL_TGACv1_196405_AA0660080,TRIAE_CS42_1AL_TGACv1_000734_AA0018090,TRIAE_CS42_3B_TGACv1_221027_AA0727340,TRIAE_CS42_1BL_TGACv1_032207_AA0126810
GO:0046470	phosphatidylcholine metabolic process	biological_process	1.316e-05	0.00027558	8	1928	55	74606	TRIAE_CS42_1BL_TGACv1_032207_AA0126810,TRIAE_CS42_3B_TGACv1_221027_AA0727340,TRIAE_CS42_1AL_TGACv1_000734_AA0018090,TRIAE_CS42_1DL_TGACv1_062419_AA0214280,TRIAE_CS42_3B_TGACv1_222617_AA0767980,TRIAE_CS42_3AL_TGACv1_196405_AA0660080,TRIAE_CS42_1DL_TGACv1_063094_AA0223830,TRIAE_CS42_3DL_TGACv1_254806_AA0896680
GO:0016765	transferase activity, transferring alkyl or aryl (other than methyl) groups	molecular_function	1.335e-05	0.00027868	16	1928	170	74606	TRIAE_CS42_7BL_TGACv1_577849_AA1884560,TRIAE_CS42_3DS_TGACv1_274021_AA0934410,TRIAE_CS42_3B_TGACv1_223441_AA0782230,TRIAE_CS42_3AS_TGACv1_213440_AA0706960,TRIAE_CS42_6BL_TGACv1_500297_AA1602810,TRIAE_CS42_1DL_TGACv1_061444_AA0195450,TRIAE_CS42_7AL_TGACv1_559693_AA1800520,TRIAE_CS42_6AL_TGACv1_475648_AA1536640,TRIAE_CS42_1AL_TGACv1_002642_AA0044130,TRIAE_CS42_2BS_TGACv1_147224_AA0480120,TRIAE_CS42…
GO:0006633	fatty acid biosynthetic process	biological_process	1.3696e-05	0.00028504	22	1928	319	74606	TRIAE_CS42_2BL_TGACv1_129564_AA0388780,TRIAE_CS42_7BL_TGACv1_577849_AA1884560,TRIAE_CS42_1BL_TGACv1_030654_AA0097000,TRIAE_CS42_7BS_TGACv1_593415_AA1951220,TRIAE_CS42_U_TGACv1_644014_AA2136450,TRIAE_CS42_4AL_TGACv1_289200_AA0967200,TRIAE_CS42_7AL_TGACv1_559693_AA1800520,TRIAE_CS42_6DL_TGACv1_526391_AA1681850,TRIAE_CS42_7AS_TGACv1_572202_AA1851680,TRIAE_CS42_2AL_TGACv1_093558_AA0282560,TRIAE_CS42_…
GO:0008426	protein kinase C inhibitor activity	molecular_function	1.3888e-05	0.00028814	3	1928	3	74606	TRIAE_CS42_4DS_TGACv1_362253_AA1178260,TRIAE_CS42_4AL_TGACv1_289949_AA0979320,TRIAE_CS42_4BS_TGACv1_330937_AA1109120
GO:0004314	[acyl-carrier-protein] S-malonyltransferase activity	molecular_function	1.4119e-05	0.00029023	3	1928	3	74606	TRIAE_CS42_U_TGACv1_643054_AA2126680,TRIAE_CS42_4AS_TGACv1_306673_AA1011900,TRIAE_CS42_4DL_TGACv1_343777_AA1139610
GO:0016419	S-malonyltransferase activity	molecular_function	1.4119e-05	0.00029023	3	1928	3	74606	TRIAE_CS42_U_TGACv1_643054_AA2126680,TRIAE_CS42_4DL_TGACv1_343777_AA1139610,TRIAE_CS42_4AS_TGACv1_306673_AA1011900
GO:0016420	malonyltransferase activity	molecular_function	1.4119e-05	0.00029023	3	1928	3	74606	TRIAE_CS42_4AS_TGACv1_306673_AA1011900,TRIAE_CS42_4DL_TGACv1_343777_AA1139610,TRIAE_CS42_U_TGACv1_643054_AA2126680
GO:0019200	carbohydrate kinase activity	molecular_function	1.4446e-05	0.00029605	10	1928	84	74606	TRIAE_CS42_7AS_TGACv1_570780_AA1840810,TRIAE_CS42_4DL_TGACv1_343659_AA1137850,TRIAE_CS42_1AL_TGACv1_000755_AA0018450,TRIAE_CS42_6AL_TGACv1_471645_AA1512290,TRIAE_CS42_7DS_TGACv1_622764_AA2045010,TRIAE_CS42_4BL_TGACv1_320480_AA1040880,TRIAE_CS42_1DL_TGACv1_063603_AA0229020,TRIAE_CS42_4AS_TGACv1_306645_AA1011430,TRIAE_CS42_7BS_TGACv1_592594_AA1941060,TRIAE_CS42_7AS_TGACv1_571836_AA1850200
GO:0009535	chloroplast thylakoid membrane	cellular_component	1.4537e-05	0.00029612	34	1928	463	74606	TRIAE_CS42_2DL_TGACv1_158421_AA0518370,TRIAE_CS42_2DL_TGACv1_160210_AA0548190,TRIAE_CS42_7DS_TGACv1_625332_AA2064910,TRIAE_CS42_6AS_TGACv1_486605_AA1563110,TRIAE_CS42_1DL_TGACv1_061593_AA0199400,TRIAE_CS42_6AS_TGACv1_485824_AA1552840,TRIAE_CS42_7BS_TGACv1_592029_AA1928680,TRIAE_CS42_1DL_TGACv1_061593_AA0199390,TRIAE_CS42_6AS_TGACv1_485824_AA1552860,TRIAE_CS42_6AS_TGACv1_485824_AA1552850,TRIAE_CS4…
GO:0055035	plastid thylakoid membrane	cellular_component	1.4537e-05	0.00029612	34	1928	463	74606	TRIAE_CS42_1BL_TGACv1_030603_AA0095440,TRIAE_CS42_1BL_TGACv1_033509_AA0140020,TRIAE_CS42_U_TGACv1_643126_AA2127630,TRIAE_CS42_5BL_TGACv1_404454_AA1300370,TRIAE_CS42_3AS_TGACv1_210574_AA0675360,TRIAE_CS42_6BS_TGACv1_514208_AA1656950,TRIAE_CS42_7AL_TGACv1_557134_AA1777250,AIG90477,TRIAE_CS42_5BL_TGACv1_405241_AA1323080,TRIAE_CS42_1AL_TGACv1_000383_AA0010660,TRIAE_CS42_6BS_TGACv1_514827_AA1664770,TR…
GO:0006631	fatty acid metabolic process	biological_process	1.5141e-05	0.00030749	26	1928	422	74606	TRIAE_CS42_7DL_TGACv1_604116_AA1994020,TRIAE_CS42_7DS_TGACv1_623765_AA2056000,TRIAE_CS42_7DS_TGACv1_622381_AA2038650,TRIAE_CS42_5BL_TGACv1_404481_AA1301440,TRIAE_CS42_1AL_TGACv1_000132_AA0004290,TRIAE_CS42_2BL_TGACv1_129465_AA0384880,TRIAE_CS42_7AS_TGACv1_569074_AA1806510,TRIAE_CS42_6AL_TGACv1_472181_AA1518660,TRIAE_CS42_7BS_TGACv1_591992_AA1927520,TRIAE_CS42_1DL_TGACv1_061125_AA0186220,TRIAE_CS4…
GO:0005905	coated pit	cellular_component	1.5782e-05	0.00031954	5	1928	16	74606	TRIAE_CS42_7AL_TGACv1_556695_AA1769100,TRIAE_CS42_4DS_TGACv1_362497_AA1180110,TRIAE_CS42_4AL_TGACv1_288747_AA0957130,TRIAE_CS42_4BS_TGACv1_328452_AA1088030,TRIAE_CS42_7DL_TGACv1_602635_AA1963430
GO:0003825	alpha,alpha-trehalose-phosphate synthase (UDP-forming) activity	molecular_function	1.7197e-05	0.00034714	3	1928	4	74606	TRIAE_CS42_1BL_TGACv1_031944_AA0123110,TRIAE_CS42_1DL_TGACv1_061317_AA0192320,TRIAE_CS42_1AL_TGACv1_001119_AA0025400
GO:0003872	6-phosphofructokinase activity	molecular_function	1.7601e-05	0.00035317	7	1928	38	74606	TRIAE_CS42_6AL_TGACv1_471645_AA1512290,TRIAE_CS42_7AS_TGACv1_571836_AA1850200,TRIAE_CS42_7BS_TGACv1_592594_AA1941060,TRIAE_CS42_7DS_TGACv1_622764_AA2045010,TRIAE_CS42_1DL_TGACv1_063603_AA0229020,TRIAE_CS42_7AS_TGACv1_570780_AA1840810,TRIAE_CS42_1AL_TGACv1_000755_AA0018450
GO:0061615	glycolytic process through fructose-6-phosphate	biological_process	1.7601e-05	0.00035317	7	1928	38	74606	TRIAE_CS42_6AL_TGACv1_471645_AA1512290,TRIAE_CS42_7AS_TGACv1_571836_AA1850200,TRIAE_CS42_7BS_TGACv1_592594_AA1941060,TRIAE_CS42_1DL_TGACv1_063603_AA0229020,TRIAE_CS42_7DS_TGACv1_622764_AA2045010,TRIAE_CS42_7AS_TGACv1_570780_AA1840810,TRIAE_CS42_1AL_TGACv1_000755_AA0018450
GO:0003896	DNA primase activity	molecular_function	1.88e-05	0.000375	4	1928	9	74606	TRIAE_CS42_1DL_TGACv1_061894_AA0205340,TRIAE_CS42_2DL_TGACv1_161360_AA0558180,TRIAE_CS42_2AL_TGACv1_094809_AA0303420,TRIAE_CS42_2BL_TGACv1_129976_AA0400820
GO:0006269	DNA replication, synthesis of RNA primer	biological_process	1.88e-05	0.000375	4	1928	9	74606	TRIAE_CS42_2BL_TGACv1_129976_AA0400820,TRIAE_CS42_2DL_TGACv1_161360_AA0558180,TRIAE_CS42_1DL_TGACv1_061894_AA0205340,TRIAE_CS42_2AL_TGACv1_094809_AA0303420
GO:0009250	glucan biosynthetic process	biological_process	1.9103e-05	0.0003799	15	1928	212	74606	TRIAE_CS42_1BL_TGACv1_031136_AA0108420,TRIAE_CS42_1BL_TGACv1_031712_AA0119450,TRIAE_CS42_2AL_TGACv1_093163_AA0273760,TRIAE_CS42_4DS_TGACv1_361657_AA1171120,TRIAE_CS42_1DL_TGACv1_062182_AA0210070,TRIAE_CS42_2DL_TGACv1_161143_AA0557040,TRIAE_CS42_4AL_TGACv1_289959_AA0979560,TRIAE_CS42_4BS_TGACv1_328010_AA1080930,TRIAE_CS42_1AL_TGACv1_000384_AA0010710,TRIAE_CS42_2BL_TGACv1_131614_AA0429850,TRIAE_CS4…
GO:1901576	organic substance biosynthetic process	biological_process	2.0094e-05	0.00039844	339	1928	10425	74606	TRIAE_CS42_6BL_TGACv1_500652_AA1608010,TRIAE_CS42_5AL_TGACv1_373966_AA1185670,TRIAE_CS42_2DS_TGACv1_180213_AA0610440,TRIAE_CS42_6DL_TGACv1_526666_AA1689370,TRIAE_CS42_4AL_TGACv1_288528_AA0951160,TRIAE_CS42_2DS_TGACv1_177565_AA0580190,TRIAE_CS42_5BL_TGACv1_404321_AA1295470,TRIAE_CS42_6AL_TGACv1_471945_AA1516140,TRIAE_CS42_5AL_TGACv1_375241_AA1218400,TRIAE_CS42_5DL_TGACv1_433024_AA1398620,TRIAE_CS4…
GO:0005741	mitochondrial outer membrane	cellular_component	2.1518e-05	0.00042543	10	1928	60	74606	TRIAE_CS42_5AL_TGACv1_378731_AA1254390,TRIAE_CS42_4BL_TGACv1_321851_AA1066240,TRIAE_CS42_3DL_TGACv1_252453_AA0890080,TRIAE_CS42_4DL_TGACv1_343137_AA1130350,TRIAE_CS42_3AL_TGACv1_194730_AA0638300,TRIAE_CS42_4DL_TGACv1_345350_AA1152790,TRIAE_CS42_3B_TGACv1_223093_AA0776380,TRIAE_CS42_3B_TGACv1_222757_AA0770040,TRIAE_CS42_4BL_TGACv1_321242_AA1057770,TRIAE_CS42_3B_TGACv1_223525_AA0783520
GO:0030060	L-malate dehydrogenase activity	molecular_function	2.1618e-05	0.00042614	6	1928	25	74606	TRIAE_CS42_1AL_TGACv1_000087_AA0002830,TRIAE_CS42_1DL_TGACv1_061661_AA0201230,TRIAE_CS42_1AL_TGACv1_002631_AA0043990,TRIAE_CS42_7BL_TGACv1_578344_AA1893330,TRIAE_CS42_1BL_TGACv1_031464_AA0114600,TRIAE_CS42_1BL_TGACv1_030950_AA0104200
GO:0005488	binding	molecular_function	2.3184e-05	0.00045568	1138	1928	43115	74606	TRIAE_CS42_6AS_TGACv1_485161_AA1538440,TRIAE_CS42_U_TGACv1_641043_AA2083140,TRIAE_CS42_6BS_TGACv1_513585_AA1645280,TRIAE_CS42_7AL_TGACv1_557283_AA1779210,TRIAE_CS42_4DL_TGACv1_342899_AA1124970,TRIAE_CS42_1DL_TGACv1_061125_AA0186220,TRIAE_CS42_1DL_TGACv1_064270_AA0233670,TRIAE_CS42_2BL_TGACv1_131305_AA0425720,TRIAE_CS42_3B_TGACv1_224708_AA0800320,TRIAE_CS42_1AL_TGACv1_000501_AA0013500,TRIAE_CS42_3…
_3AL_TGACv1_198344_AA0668440,TRIAE_CS42_3AL_TGACv1_195082_AA0644480,TRIAE_CS42_6AS_TGACv1_487743_AA1572700,TRIAE_CS42_7DS_TGACv1_623122_AA2049790,TRIAE_CS42_3DL_TGACv1_249642_AA0853270,TRIAE_CS42_6BS_TGACv1_515249_AA1668600,TRIAE_CS42_7BL_TGACv1_579010_AA1902990,TRIAE_CS42_4AS_TGACv1_307192_AA1018220,TRIAE_CS42_5BL_TGACv1_412119_AA1367740,TRIAE_CS42_1DL_TGACv1_061476_AA0196370,TRIAE_CS42_1DL_TGAC…
GO:0033036	macromolecule localization	biological_process	2.4882e-05	0.00048763	55	1928	1143	74606	TRIAE_CS42_4BS_TGACv1_328452_AA1088030,TRIAE_CS42_2DL_TGACv1_158815_AA0526570,TRIAE_CS42_U_TGACv1_642388_AA2116800,TRIAE_CS42_4DS_TGACv1_362497_AA1180110,TRIAE_CS42_5DL_TGACv1_434879_AA1443050,TRIAE_CS42_6AL_TGACv1_471165_AA1503930,TRIAE_CS42_4BL_TGACv1_321242_AA1057770,TRIAE_CS42_6AS_TGACv1_486272_AA1559050,TRIAE_CS42_5DS_TGACv1_458693_AA1494370,TRIAE_CS42_4BL_TGACv1_320261_AA1032800,TRIAE_CS42_…
GO:0016747	transferase activity, transferring acyl groups other than amino-acyl groups	molecular_function	2.5887e-05	0.00050585	54	1928	1214	74606	TRIAE_CS42_4AL_TGACv1_292578_AA0999200,TRIAE_CS42_6AS_TGACv1_486115_AA1557000,TRIAE_CS42_4AL_TGACv1_289200_AA0967200,TRIAE_CS42_6DL_TGACv1_526391_AA1681850,TRIAE_CS42_7AS_TGACv1_572202_AA1851680,TRIAE_CS42_5DL_TGACv1_433144_AA1403510,TRIAE_CS42_1DL_TGACv1_061584_AA0199150,TRIAE_CS42_6DS_TGACv1_544326_AA1747750,TRIAE_CS42_U_TGACv1_644014_AA2136450,TRIAE_CS42_7BS_TGACv1_593415_AA1951220,TRIAE_CS42_…
GO:0034051	negative regulation of plant-type hypersensitive response	biological_process	2.601e-05	0.00050678	3	1928	3	74606	TRIAE_CS42_1DL_TGACv1_062362_AA0213270,TRIAE_CS42_1BL_TGACv1_030567_AA0094200,TRIAE_CS42_1AL_TGACv1_002853_AA0045580
GO:0032051	clathrin light chain binding	molecular_function	2.6892e-05	0.00052094	3	1928	5	74606	TRIAE_CS42_4DS_TGACv1_362497_AA1180110,TRIAE_CS42_4BS_TGACv1_328452_AA1088030,TRIAE_CS42_4AL_TGACv1_288747_AA0957130
GO:0071439	clathrin complex	cellular_component	2.6892e-05	0.00052094	3	1928	5	74606	TRIAE_CS42_4AL_TGACv1_288747_AA0957130,TRIAE_CS42_4BS_TGACv1_328452_AA1088030,TRIAE_CS42_4DS_TGACv1_362497_AA1180110
GO:0072330	monocarboxylic acid biosynthetic process	biological_process	2.8759e-05	0.00055551	26	1928	433	74606	TRIAE_CS42_7BL_TGACv1_577849_AA1884560,TRIAE_CS42_1BL_TGACv1_030654_AA0097000,TRIAE_CS42_7BS_TGACv1_593415_AA1951220,TRIAE_CS42_U_TGACv1_644014_AA2136450,TRIAE_CS42_2BL_TGACv1_129564_AA0388780,TRIAE_CS42_6DL_TGACv1_526391_AA1681850,TRIAE_CS42_7AS_TGACv1_572202_AA1851680,TRIAE_CS42_2AL_TGACv1_093558_AA0282560,TRIAE_CS42_4AL_TGACv1_289200_AA0967200,TRIAE_CS42_7AL_TGACv1_559693_AA1800520,TRIAE_CS42_…
GO:0030125	clathrin vesicle coat	cellular_component	2.9573e-05	0.00056797	5	1928	18	74606	TRIAE_CS42_7DL_TGACv1_602635_AA1963430,TRIAE_CS42_4AL_TGACv1_288747_AA0957130,TRIAE_CS42_4BS_TGACv1_328452_AA1088030,TRIAE_CS42_7AL_TGACv1_556695_AA1769100,TRIAE_CS42_4DS_TGACv1_362497_AA1180110
GO:0030130	clathrin coat of trans-Golgi network vesicle	cellular_component	2.9573e-05	0.00056797	5	1928	18	74606	TRIAE_CS42_7DL_TGACv1_602635_AA1963430,TRIAE_CS42_4BS_TGACv1_328452_AA1088030,TRIAE_CS42_4AL_TGACv1_288747_AA0957130,TRIAE_CS42_7AL_TGACv1_556695_AA1769100,TRIAE_CS42_4DS_TGACv1_362497_AA1180110
GO:0006561	proline biosynthetic process	biological_process	3.0963e-05	0.00059298	5	1928	16	74606	TRIAE_CS42_1AL_TGACv1_000254_AA0007380,TRIAE_CS42_3B_TGACv1_225182_AA0805900,TRIAE_CS42_3DL_TGACv1_250063_AA0861520,TRIAE_CS42_5DL_TGACv1_434775_AA1441440,TRIAE_CS42_1AL_TGACv1_000254_AA0007370
GO:0042651	thylakoid membrane	cellular_component	3.2421e-05	0.00061913	37	1928	547	74606	TRIAE_CS42_1AL_TGACv1_009365_AA0055660,TRIAE_CS42_3DS_TGACv1_272293_AA0918520,TRIAE_CS42_1AL_TGACv1_000383_AA0010660,TRIAE_CS42_5BL_TGACv1_405241_AA1323080,TRIAE_CS42_6BS_TGACv1_514827_AA1664770,TRIAE_CS42_1BS_TGACv1_050006_AA0165760,TRIAE_CS42_6AS_TGACv1_485824_AA1552830,TRIAE_CS42_7DS_TGACv1_621370_AA2013200,TRIAE_CS42_7BS_TGACv1_592029_AA1928690,TRIAE_CS42_1DS_TGACv1_082951_AA0265140,TRIAE_CS4…
GO:0008654	phospholipid biosynthetic process	biological_process	3.2692e-05	0.00062254	14	1928	166	74606	TRIAE_CS42_1AL_TGACv1_000734_AA0018090,TRIAE_CS42_U_TGACv1_643011_AA2126070,TRIAE_CS42_3DL_TGACv1_254806_AA0896680,TRIAE_CS42_2BS_TGACv1_146926_AA0475500,TRIAE_CS42_1DL_TGACv1_062419_AA0214280,TRIAE_CS42_1DL_TGACv1_063094_AA0223830,TRIAE_CS42_3AL_TGACv1_196405_AA0660080,TRIAE_CS42_1BL_TGACv1_032207_AA0126810,TRIAE_CS42_5AL_TGACv1_375241_AA1218400,TRIAE_CS42_5DL_TGACv1_433024_AA1398620,TRIAE_CS42_…
GO:0019252	starch biosynthetic process	biological_process	3.3892e-05	0.00064357	7	1928	43	74606	TRIAE_CS42_1DL_TGACv1_062182_AA0210070,TRIAE_CS42_2AL_TGACv1_093163_AA0273760,TRIAE_CS42_2DL_TGACv1_159587_AA0540290,TRIAE_CS42_1AL_TGACv1_000384_AA0010710,TRIAE_CS42_2BL_TGACv1_131614_AA0429850,TRIAE_CS42_1BL_TGACv1_031136_AA0108420,TRIAE_CS42_1BL_TGACv1_031712_AA0119450
GO:0046912	transferase activity, transferring acyl groups, acyl groups converted into alkyl on transfer	molecular_function	3.5793e-05	0.00067775	6	1928	29	74606	TRIAE_CS42_3B_TGACv1_223975_AA0790450,TRIAE_CS42_3DS_TGACv1_273018_AA0927550,TRIAE_CS42_7DS_TGACv1_623117_AA2049760,TRIAE_CS42_3AS_TGACv1_212208_AA0698820,TRIAE_CS42_5AL_TGACv1_378173_AA1251720,TRIAE_CS42_7BS_TGACv1_591893_AA1924780
GO:0004350	glutamate-5-semialdehyde dehydrogenase activity	molecular_function	3.6582e-05	0.00069073	3	1928	4	74606	TRIAE_CS42_3B_TGACv1_225182_AA0805900,TRIAE_CS42_3DL_TGACv1_250063_AA0861520,TRIAE_CS42_1AL_TGACv1_000254_AA0007370
GO:0030894	replisome	cellular_component	3.7739e-05	0.00070664	4	1928	8	74606	TRIAE_CS42_1DL_TGACv1_061346_AA0192790,TRIAE_CS42_4AS_TGACv1_306214_AA1004350,TRIAE_CS42_4BL_TGACv1_321871_AA1066490,TRIAE_CS42_4DL_TGACv1_342972_AA1126540
GO:0043596	nuclear replication fork	cellular_component	3.7739e-05	0.00070664	4	1928	8	74606	TRIAE_CS42_4DL_TGACv1_342972_AA1126540,TRIAE_CS42_4BL_TGACv1_321871_AA1066490,TRIAE_CS42_4AS_TGACv1_306214_AA1004350,TRIAE_CS42_1DL_TGACv1_061346_AA0192790
GO:0043601	nuclear replisome	cellular_component	3.7739e-05	0.00070664	4	1928	8	74606	TRIAE_CS42_1DL_TGACv1_061346_AA0192790,TRIAE_CS42_4BL_TGACv1_321871_AA1066490,TRIAE_CS42_4AS_TGACv1_306214_AA1004350,TRIAE_CS42_4DL_TGACv1_342972_AA1126540
GO:0070283	radical SAM enzyme activity	molecular_function	3.8634e-05	0.00072139	4	1928	9	74606	TRIAE_CS42_7BS_TGACv1_592934_AA1946410,TRIAE_CS42_1BL_TGACv1_030654_AA0097000,TRIAE_CS42_1DL_TGACv1_061125_AA0186220,TRIAE_CS42_1AL_TGACv1_000132_AA0004290
GO:0004349	glutamate 5-kinase activity	molecular_function	3.8805e-05	0.00072258	3	1928	4	74606	TRIAE_CS42_1AL_TGACv1_000254_AA0007380,TRIAE_CS42_3B_TGACv1_225182_AA0805900,TRIAE_CS42_3DL_TGACv1_250063_AA0861520
GO:0009067	aspartate family amino acid biosynthetic process	biological_process	4.2158e-05	0.00078284	10	1928	85	74606	TRIAE_CS42_4DL_TGACv1_343385_AA1133850,TRIAE_CS42_5AS_TGACv1_393328_AA1271350,TRIAE_CS42_4AL_TGACv1_290117_AA0981910,TRIAE_CS42_4BS_TGACv1_330819_AA1108930,TRIAE_CS42_4DS_TGACv1_361983_AA1175310,TRIAE_CS42_5DS_TGACv1_456564_AA1474130,TRIAE_CS42_4AS_TGACv1_307275_AA1019080,TRIAE_CS42_4BL_TGACv1_320349_AA1036310,TRIAE_CS42_5BS_TGACv1_423584_AA1379990,TRIAE_CS42_7DS_TGACv1_624143_AA2059180
GO:0008483	transaminase activity	molecular_function	4.3469e-05	0.00080273	11	1928	110	74606	TRIAE_CS42_6AS_TGACv1_486551_AA1562560,TRIAE_CS42_6BS_TGACv1_513449_AA1641870,TRIAE_CS42_7BL_TGACv1_581547_AA1917420,TRIAE_CS42_6AL_TGACv1_471819_AA1514670,TRIAE_CS42_6DS_TGACv1_543365_AA1739120,TRIAE_CS42_6BS_TGACv1_514473_AA1660220,TRIAE_CS42_6DL_TGACv1_526902_AA1694710,TRIAE_CS42_1AS_TGACv1_019912_AA0072730,TRIAE_CS42_1BL_TGACv1_031520_AA0115500,TRIAE_CS42_1AL_TGACv1_001479_AA0031070,TRIAE_CS4…
GO:0016769	transferase activity, transferring nitrogenous groups	molecular_function	4.3469e-05	0.00080273	11	1928	110	74606	TRIAE_CS42_6AL_TGACv1_471819_AA1514670,TRIAE_CS42_6DS_TGACv1_543365_AA1739120,TRIAE_CS42_7BL_TGACv1_581547_AA1917420,TRIAE_CS42_6BS_TGACv1_513449_AA1641870,TRIAE_CS42_6AS_TGACv1_486551_AA1562560,TRIAE_CS42_6DS_TGACv1_543240_AA1737380,TRIAE_CS42_1AL_TGACv1_001479_AA0031070,TRIAE_CS42_6BS_TGACv1_514473_AA1660220,TRIAE_CS42_6DL_TGACv1_526902_AA1694710,TRIAE_CS42_1AS_TGACv1_019912_AA0072730,TRIAE_CS4…
GO:0009308	amine metabolic process	biological_process	4.604e-05	0.0008479	21	1928	314	74606	TRIAE_CS42_5AL_TGACv1_375039_AA1214530,TRIAE_CS42_1AL_TGACv1_000734_AA0018090,TRIAE_CS42_3B_TGACv1_222617_AA0767980,TRIAE_CS42_1DL_TGACv1_062419_AA0214280,TRIAE_CS42_1DL_TGACv1_063094_AA0223830,TRIAE_CS42_7AL_TGACv1_557898_AA1787490,TRIAE_CS42_1AL_TGACv1_002153_AA0039220,TRIAE_CS42_4AL_TGACv1_288915_AA0961290,TRIAE_CS42_4DS_TGACv1_361714_AA1171870,TRIAE_CS42_1BL_TGACv1_032207_AA0126810,TRIAE_CS42…
GO:0030126	COPI vesicle coat	cellular_component	4.6647e-05	0.00085673	5	1928	23	74606	TRIAE_CS42_1AL_TGACv1_001331_AA0028860,TRIAE_CS42_4BL_TGACv1_321458_AA1060720,TRIAE_CS42_5AL_TGACv1_374774_AA1208800,TRIAE_CS42_1DL_TGACv1_061297_AA0191640,TRIAE_CS42_1BL_TGACv1_031076_AA0107250
GO:0010354	homogentisate prenyltransferase activity	molecular_function	4.7615e-05	0.00087211	3	1928	4	74606	TRIAE_CS42_7DL_TGACv1_604116_AA1994020,TRIAE_CS42_7AL_TGACv1_559693_AA1800520,TRIAE_CS42_7BL_TGACv1_577849_AA1884560
GO:0030136	clathrin-coated vesicle	cellular_component	4.9627e-05	0.00090649	8	1928	62	74606	TRIAE_CS42_7AL_TGACv1_556695_AA1769100,TRIAE_CS42_3B_TGACv1_220835_AA0720860,TRIAE_CS42_3AL_TGACv1_194328_AA0631110,TRIAE_CS42_7DL_TGACv1_602635_AA1963430,TRIAE_CS42_4AL_TGACv1_288747_AA0957130,TRIAE_CS42_4DS_TGACv1_362497_AA1180110,TRIAE_CS42_3DL_TGACv1_250339_AA0866430,TRIAE_CS42_4BS_TGACv1_328452_AA1088030
GO:0019202	amino acid kinase activity	molecular_function	5.3664e-05	0.00097758	5	1928	19	74606	TRIAE_CS42_U_TGACv1_641432_AA2094970,TRIAE_CS42_5BL_TGACv1_404321_AA1295470,TRIAE_CS42_3B_TGACv1_225182_AA0805900,TRIAE_CS42_1AL_TGACv1_000254_AA0007380,TRIAE_CS42_3DL_TGACv1_250063_AA0861520
GO:0022406	membrane docking	biological_process	5.4937e-05	0.00099551	8	1928	60	74606	TRIAE_CS42_5BS_TGACv1_424367_AA1389100,TRIAE_CS42_6BL_TGACv1_500073_AA1598240,TRIAE_CS42_6AL_TGACv1_471366_AA1507720,TRIAE_CS42_6DL_TGACv1_526657_AA1689120,TRIAE_CS42_5AS_TGACv1_394157_AA1278420,TRIAE_CS42_6BL_TGACv1_499660_AA1588490,TRIAE_CS42_5AS_TGACv1_394157_AA1278470,TRIAE_CS42_6BL_TGACv1_500073_AA1598210
GO:0006900	membrane budding	biological_process	5.4944e-05	0.00099551	8	1928	65	74606	TRIAE_CS42_3DL_TGACv1_250339_AA0866430,TRIAE_CS42_4BS_TGACv1_328452_AA1088030,TRIAE_CS42_4DS_TGACv1_361471_AA1168550,TRIAE_CS42_4DS_TGACv1_362497_AA1180110,TRIAE_CS42_4AL_TGACv1_288747_AA0957130,TRIAE_CS42_4BL_TGACv1_320261_AA1032800,TRIAE_CS42_3B_TGACv1_220835_AA0720860,TRIAE_CS42_3AL_TGACv1_194328_AA0631110
GO:0097164	ammonium ion metabolic process	biological_process	5.7884e-05	0.001046	9	1928	83	74606	TRIAE_CS42_1DL_TGACv1_063094_AA0223830,TRIAE_CS42_3B_TGACv1_222617_AA0767980,TRIAE_CS42_1DL_TGACv1_062419_AA0214280,TRIAE_CS42_3AL_TGACv1_196405_AA0660080,TRIAE_CS42_5AL_TGACv1_375327_AA1219960,TRIAE_CS42_3DL_TGACv1_254806_AA0896680,TRIAE_CS42_1AL_TGACv1_000734_AA0018090,TRIAE_CS42_3B_TGACv1_221027_AA0727340,TRIAE_CS42_1BL_TGACv1_032207_AA0126810
GO:0012510	trans-Golgi network transport vesicle membrane	cellular_component	5.919e-05	0.0010638	5	1928	21	74606	TRIAE_CS42_4DS_TGACv1_362497_AA1180110,TRIAE_CS42_7AL_TGACv1_556695_AA1769100,TRIAE_CS42_7DL_TGACv1_602635_AA1963430,TRIAE_CS42_4BS_TGACv1_328452_AA1088030,TRIAE_CS42_4AL_TGACv1_288747_AA0957130
GO:0030665	clathrin-coated vesicle membrane	cellular_component	5.919e-05	0.0010638	5	1928	21	74606	TRIAE_CS42_4AL_TGACv1_288747_AA0957130,TRIAE_CS42_4BS_TGACv1_328452_AA1088030,TRIAE_CS42_7DL_TGACv1_602635_AA1963430,TRIAE_CS42_4DS_TGACv1_362497_AA1180110,TRIAE_CS42_7AL_TGACv1_556695_AA1769100
GO:0016491	oxidoreductase activity	molecular_function	6.1918e-05	0.0011099	183	1928	5365	74606	TRIAE_CS42_2DL_TGACv1_157956_AA0503330,TRIAE_CS42_1BL_TGACv1_031464_AA0114600,TRIAE_CS42_5BL_TGACv1_406279_AA1343630,TRIAE_CS42_3B_TGACv1_222825_AA0771410,TRIAE_CS42_1DL_TGACv1_062359_AA0213210,TRIAE_CS42_U_TGACv1_645225_AA2143600,TRIAE_CS42_5AL_TGACv1_374680_AA1206310,TRIAE_CS42_2DS_TGACv1_177357_AA0574350,TRIAE_CS42_1DL_TGACv1_061661_AA0201230,TRIAE_CS42_7DL_TGACv1_605845_AA2008250,TRIAE_CS42_3…
GO:0006537	glutamate biosynthetic process	biological_process	6.6276e-05	0.0011849	3	1928	6	74606	TRIAE_CS42_U_TGACv1_654540_AA2150720,TRIAE_CS42_3B_TGACv1_220588_AA0709800,TRIAE_CS42_3AL_TGACv1_193640_AA0616020
GO:0006536	glutamate metabolic process	biological_process	6.7136e-05	0.0011971	6	1928	32	74606	TRIAE_CS42_U_TGACv1_654540_AA2150720,TRIAE_CS42_3DS_TGACv1_272233_AA0917470,TRIAE_CS42_3B_TGACv1_220588_AA0709800,TRIAE_CS42_3B_TGACv1_222610_AA0767770,TRIAE_CS42_3AL_TGACv1_193640_AA0616020,TRIAE_CS42_3AS_TGACv1_211026_AA0683390
GO:0005534	galactose binding	molecular_function	6.8103e-05	0.0012111	4	1928	12	74606	TRIAE_CS42_7AL_TGACv1_557551_AA1782900,TRIAE_CS42_2DL_TGACv1_160680_AA0553060,TRIAE_CS42_2AL_TGACv1_093541_AA0282230,TRIAE_CS42_2BL_TGACv1_131119_AA0422830
GO:0016741	transferase activity, transferring one-carbon groups	molecular_function	6.8808e-05	0.0012204	44	1928	957	74606	TRIAE_CS42_3AS_TGACv1_210938_AA0681720,TRIAE_CS42_4DS_TGACv1_361403_AA1167180,TRIAE_CS42_4AS_TGACv1_307275_AA1019080,TRIAE_CS42_6AS_TGACv1_485618_AA1548920,TRIAE_CS42_7DL_TGACv1_603606_AA1986230,TRIAE_CS42_1BL_TGACv1_031722_AA0119730,TRIAE_CS42_3DL_TGACv1_249609_AA0852350,TRIAE_CS42_5BS_TGACv1_423279_AA1373080,TRIAE_CS42_1DL_TGACv1_061943_AA0206090,TRIAE_CS42_U_TGACv1_643385_AA2131440,TRIAE_CS42_…
GO:0004222	metalloendopeptidase activity	molecular_function	7.3877e-05	0.0013068	15	1928	197	74606	TRIAE_CS42_4BL_TGACv1_321605_AA1062920,TRIAE_CS42_7DL_TGACv1_604164_AA1994640,TRIAE_CS42_3AL_TGACv1_194265_AA0629810,TRIAE_CS42_3B_TGACv1_225805_AA0811930,TRIAE_CS42_3DL_TGACv1_249891_AA0858210,TRIAE_CS42_3DL_TGACv1_251108_AA0877530,TRIAE_CS42_5BS_TGACv1_424669_AA1391210,TRIAE_CS42_3AL_TGACv1_194555_AA0635620,TRIAE_CS42_3B_TGACv1_223452_AA0782450,TRIAE_CS42_4BL_TGACv1_321498_AA1061400,TRIAE_CS42_…
GO:0098589	membrane region	cellular_component	7.8127e-05	0.0013784	5	1928	22	74606	TRIAE_CS42_4BS_TGACv1_328452_AA1088030,TRIAE_CS42_4AL_TGACv1_288747_AA0957130,TRIAE_CS42_7DL_TGACv1_602635_AA1963430,TRIAE_CS42_7AL_TGACv1_556695_AA1769100,TRIAE_CS42_4DS_TGACv1_362497_AA1180110
GO:0006541	glutamine metabolic process	biological_process	8.2122e-05	0.0014451	7	1928	49	74606	TRIAE_CS42_4AS_TGACv1_307728_AA1023060,TRIAE_CS42_6DL_TGACv1_527226_AA1700820,TRIAE_CS42_6BL_TGACv1_500652_AA1608010,TRIAE_CS42_3DL_TGACv1_249279_AA0843940,TRIAE_CS42_4DL_TGACv1_343985_AA1142210,TRIAE_CS42_3B_TGACv1_223258_AA0779170,TRIAE_CS42_3AL_TGACv1_194109_AA0626660
GO:0015749	monosaccharide transport	biological_process	8.2736e-05	0.0014521	3	1928	5	74606	TRIAE_CS42_4BS_TGACv1_329699_AA1103360,TRIAE_CS42_4DS_TGACv1_361391_AA1166860,TRIAE_CS42_4AL_TGACv1_289623_AA0974220
GO:0000271	polysaccharide biosynthetic process	biological_process	8.43e-05	0.0014757	18	1928	311	74606	TRIAE_CS42_2BL_TGACv1_131614_AA0429850,TRIAE_CS42_2AL_TGACv1_093096_AA0271930,TRIAE_CS42_2BL_TGACv1_131489_AA0428400,TRIAE_CS42_4BS_TGACv1_329796_AA1104090,TRIAE_CS42_1BL_TGACv1_031712_AA0119450,TRIAE_CS42_1BL_TGACv1_031136_AA0108420,TRIAE_CS42_4AL_TGACv1_288429_AA0948580,TRIAE_CS42_2DL_TGACv1_161143_AA0557040,TRIAE_CS42_2AL_TGACv1_093163_AA0273760,TRIAE_CS42_4DS_TGACv1_361657_AA1171120,TRIAE_CS4…
GO:0047334	diphosphate-fructose-6-phosphate 1-phosphotransferase activity	molecular_function	8.5926e-05	0.0015002	4	1928	12	74606	TRIAE_CS42_7DS_TGACv1_622764_AA2045010,TRIAE_CS42_7AS_TGACv1_571836_AA1850200,TRIAE_CS42_6AL_TGACv1_471645_AA1512290,TRIAE_CS42_7BS_TGACv1_592594_AA1941060
GO:0016050	vesicle organization	biological_process	8.7981e-05	0.0015321	8	1928	70	74606	TRIAE_CS42_4BL_TGACv1_320261_AA1032800,TRIAE_CS42_3B_TGACv1_220835_AA0720860,TRIAE_CS42_3AL_TGACv1_194328_AA0631110,TRIAE_CS42_4AL_TGACv1_288747_AA0957130,TRIAE_CS42_4DS_TGACv1_361471_AA1168550,TRIAE_CS42_4DS_TGACv1_362497_AA1180110,TRIAE_CS42_3DL_TGACv1_250339_AA0866430,TRIAE_CS42_4BS_TGACv1_328452_AA1088030
GO:0031347	regulation of defense response	biological_process	8.972e-05	0.0015584	12	1928	128	74606	TRIAE_CS42_1AL_TGACv1_002853_AA0045580,TRIAE_CS42_1BL_TGACv1_030567_AA0094200,TRIAE_CS42_1BL_TGACv1_032262_AA0127620,TRIAE_CS42_7DL_TGACv1_604116_AA1994020,TRIAE_CS42_1AL_TGACv1_002619_AA0043740,TRIAE_CS42_3B_TGACv1_229631_AA0828970,TRIAE_CS42_7BL_TGACv1_577849_AA1884560,TRIAE_CS42_7AL_TGACv1_559693_AA1800520,TRIAE_CS42_1DL_TGACv1_061262_AA0190390,TRIAE_CS42_1DL_TGACv1_062962_AA0222290,TRIAE_CS42…
GO:0072523	purine-containing compound catabolic process	biological_process	9.2739e-05	0.0016067	5	1928	20	74606	TRIAE_CS42_3DL_TGACv1_250245_AA0864940,TRIAE_CS42_2AL_TGACv1_094077_AA0292200,TRIAE_CS42_2DL_TGACv1_158777_AA0526010,TRIAE_CS42_2AL_TGACv1_094486_AA0298610,TRIAE_CS42_2BL_TGACv1_129785_AA0395850
GO:0060627	regulation of vesicle-mediated transport	biological_process	9.3151e-05	0.0016097	3	1928	4	74606	TRIAE_CS42_3AL_TGACv1_197715_AA0667040,TRIAE_CS42_3DL_TGACv1_250988_AA0875910,TRIAE_CS42_3B_TGACv1_222072_AA0756730
GO:0009108	coenzyme biosynthetic process	biological_process	9.5433e-05	0.0016444	17	1928	230	74606	TRIAE_CS42_3AS_TGACv1_213440_AA0706960,TRIAE_CS42_3B_TGACv1_223441_AA0782230,TRIAE_CS42_6BL_TGACv1_500297_AA1602810,TRIAE_CS42_5AL_TGACv1_376570_AA1238560,TRIAE_CS42_3DS_TGACv1_274021_AA0934410,TRIAE_CS42_5BL_TGACv1_406279_AA1343630,TRIAE_CS42_7AS_TGACv1_571112_AA1844780,TRIAE_CS42_1BL_TGACv1_030654_AA0097000,TRIAE_CS42_6AL_TGACv1_471945_AA1516140,TRIAE_CS42_6DL_TGACv1_526382_AA1681340,TRIAE_CS42…
GO:0048193	Golgi vesicle transport	biological_process	9.5649e-05	0.0016444	12	1928	132	74606	TRIAE_CS42_2BS_TGACv1_146389_AA0464090,TRIAE_CS42_5DS_TGACv1_458693_AA1494370,TRIAE_CS42_2BL_TGACv1_130310_AA0408540,TRIAE_CS42_4BL_TGACv1_320261_AA1032800,TRIAE_CS42_2AL_TGACv1_093387_AA0279030,TRIAE_CS42_2DL_TGACv1_158815_AA0526570,TRIAE_CS42_2AS_TGACv1_113808_AA0360930,TRIAE_CS42_2AL_TGACv1_096831_AA0321630,TRIAE_CS42_2BL_TGACv1_131305_AA0425720,TRIAE_CS42_5AL_TGACv1_374451_AA1200460,TRIAE_CS4…
GO:0009152	purine ribonucleotide biosynthetic process	biological_process	9.6542e-05	0.0016555	15	1928	175	74606	TRIAE_CS42_5BL_TGACv1_406155_AA1341460,TRIAE_CS42_1AL_TGACv1_000512_AA0013610,TRIAE_CS42_6DL_TGACv1_526952_AA1695860,TRIAE_CS42_6AL_TGACv1_473321_AA1530120,TRIAE_CS42_6BL_TGACv1_499360_AA1579440,TRIAE_CS42_1AL_TGACv1_004040_AA0052320,TRIAE_CS42_1AL_TGACv1_000492_AA0013410,TRIAE_CS42_1BL_TGACv1_031692_AA0118950,TRIAE_CS42_5AL_TGACv1_374789_AA1209000,TRIAE_CS42_1DL_TGACv1_061176_AA0187850,TRIAE_CS4…
GO:0045088	regulation of innate immune response	biological_process	0.00010202	0.001745	9	1928	74	74606	TRIAE_CS42_1AL_TGACv1_002853_AA0045580,TRIAE_CS42_1BL_TGACv1_032262_AA0127620,TRIAE_CS42_1BL_TGACv1_030567_AA0094200,TRIAE_CS42_1AL_TGACv1_002619_AA0043740,TRIAE_CS42_3B_TGACv1_229631_AA0828970,TRIAE_CS42_1DL_TGACv1_062962_AA0222290,TRIAE_CS42_1DL_TGACv1_061262_AA0190390,TRIAE_CS42_1DL_TGACv1_062362_AA0213270,TRIAE_CS42_1BL_TGACv1_034437_AA0144510
GO:0043647	inositol phosphate metabolic process	biological_process	0.00010451	0.0017831	6	1928	31	74606	TRIAE_CS42_5DL_TGACv1_433402_AA1412060,TRIAE_CS42_4AL_TGACv1_288528_AA0951160,TRIAE_CS42_7DL_TGACv1_603779_AA1989110,TRIAE_CS42_5AL_TGACv1_376140_AA1232710,TRIAE_CS42_7AL_TGACv1_556888_AA1772870,TRIAE_CS42_4BS_TGACv1_328490_AA1088680
GO:0009225	nucleotide-sugar metabolic process	biological_process	0.00010693	0.0018197	7	1928	48	74606	TRIAE_CS42_6DL_TGACv1_527865_AA1709380,TRIAE_CS42_7AL_TGACv1_558796_AA1796130,TRIAE_CS42_7DL_TGACv1_603622_AA1986410,TRIAE_CS42_6AL_TGACv1_473897_AA1533380,TRIAE_CS42_7BL_TGACv1_578013_AA1887930,TRIAE_CS42_6DL_TGACv1_528145_AA1711960,TRIAE_CS42_3AS_TGACv1_211158_AA0686190
GO:0033692	cellular polysaccharide biosynthetic process	biological_process	0.00010758	0.0018261	16	1928	263	74606	TRIAE_CS42_2DL_TGACv1_161143_AA0557040,TRIAE_CS42_2AL_TGACv1_093163_AA0273760,TRIAE_CS42_4DS_TGACv1_361657_AA1171120,TRIAE_CS42_1BL_TGACv1_031712_AA0119450,TRIAE_CS42_1BL_TGACv1_031136_AA0108420,TRIAE_CS42_2AL_TGACv1_093096_AA0271930,TRIAE_CS42_2BL_TGACv1_131489_AA0428400,TRIAE_CS42_2BL_TGACv1_131614_AA0429850,TRIAE_CS42_4BS_TGACv1_328010_AA1080930,TRIAE_CS42_4AL_TGACv1_289959_AA0979560,TRIAE_CS4…
GO:0010817	regulation of hormone levels	biological_process	0.00010809	0.0018302	14	1928	168	74606	TRIAE_CS42_4AS_TGACv1_307317_AA1019370,TRIAE_CS42_4DL_TGACv1_342367_AA1111630,TRIAE_CS42_1AL_TGACv1_002153_AA0039220,TRIAE_CS42_3B_TGACv1_222513_AA0766220,TRIAE_CS42_3AL_TGACv1_194203_AA0628440,TRIAE_CS42_4AL_TGACv1_289333_AA0969280,TRIAE_CS42_1DL_TGACv1_061075_AA0184240,TRIAE_CS42_7DS_TGACv1_623153_AA2050180,TRIAE_CS42_7DL_TGACv1_603091_AA1975740,TRIAE_CS42_U_TGACv1_640854_AA2077410,TRIAE_CS42_1…
GO:0008509	anion transmembrane transporter activity	molecular_function	0.00010837	0.0018304	17	1928	263	74606	TRIAE_CS42_4BL_TGACv1_320288_AA1034040,TRIAE_CS42_4DL_TGACv1_342952_AA1125960,TRIAE_CS42_3DL_TGACv1_252453_AA0890080,TRIAE_CS42_4BL_TGACv1_321851_AA1066240,TRIAE_CS42_3AL_TGACv1_194874_AA0641130,TRIAE_CS42_4DL_TGACv1_345350_AA1152790,TRIAE_CS42_4AS_TGACv1_306580_AA1010510,TRIAE_CS42_5BL_TGACv1_405907_AA1337450,TRIAE_CS42_3DS_TGACv1_272832_AA0925630,TRIAE_CS42_5AL_TGACv1_374188_AA1192880,TRIAE_CS4…
GO:0050776	regulation of immune response	biological_process	0.00011101	0.0018702	9	1928	75	74606	TRIAE_CS42_1BL_TGACv1_034437_AA0144510,TRIAE_CS42_1DL_TGACv1_062362_AA0213270,TRIAE_CS42_1DL_TGACv1_062962_AA0222290,TRIAE_CS42_1DL_TGACv1_061262_AA0190390,TRIAE_CS42_3B_TGACv1_229631_AA0828970,TRIAE_CS42_1BL_TGACv1_032262_AA0127620,TRIAE_CS42_1BL_TGACv1_030567_AA0094200,TRIAE_CS42_1AL_TGACv1_002619_AA0043740,TRIAE_CS42_1AL_TGACv1_002853_AA0045580
GO:0009532	plastid stroma	cellular_component	0.00011311	0.0019009	31	1928	571	74606	TRIAE_CS42_5AL_TGACv1_374631_AA1204970,TRIAE_CS42_2BS_TGACv1_146384_AA0464010,TRIAE_CS42_1BL_TGACv1_033050_AA0136470,TRIAE_CS42_7DS_TGACv1_624143_AA2059180,TRIAE_CS42_5AL_TGACv1_379463_AA1256450,TRIAE_CS42_4AS_TGACv1_306406_AA1007690,TRIAE_CS42_2AL_TGACv1_094865_AA0304200,TRIAE_CS42_2BL_TGACv1_129772_AA0395390,TRIAE_CS42_U_TGACv1_641465_AA2095880,TRIAE_CS42_5DL_TGACv1_433661_AA1418670,TRIAE_CS42_…
GO:0051539	4 iron, 4 sulfur cluster binding	molecular_function	0.00011382	0.0019079	10	1928	100	74606	TRIAE_CS42_6BL_TGACv1_500845_AA1610610,TRIAE_CS42_1BL_TGACv1_030654_AA0097000,TRIAE_CS42_1AL_TGACv1_000132_AA0004290,TRIAE_CS42_1AL_TGACv1_001652_AA0033600,TRIAE_CS42_2BL_TGACv1_129976_AA0400820,TRIAE_CS42_7BS_TGACv1_592934_AA1946410,TRIAE_CS42_1DL_TGACv1_061125_AA0186220,TRIAE_CS42_2AL_TGACv1_094809_AA0303420,TRIAE_CS42_1DL_TGACv1_061476_AA0196370,TRIAE_CS42_2DL_TGACv1_161360_AA0558180
GO:0003873	6-phosphofructo-2-kinase activity	molecular_function	0.00011807	0.0019694	3	1928	6	74606	TRIAE_CS42_4AS_TGACv1_306645_AA1011430,TRIAE_CS42_4BL_TGACv1_320480_AA1040880,TRIAE_CS42_4DL_TGACv1_343659_AA1137850
GO:0006003	fructose 2,6-bisphosphate metabolic process	biological_process	0.00011807	0.0019694	3	1928	6	74606	TRIAE_CS42_4BL_TGACv1_320480_AA1040880,TRIAE_CS42_4AS_TGACv1_306645_AA1011430,TRIAE_CS42_4DL_TGACv1_343659_AA1137850
GO:0033178	proton-transporting two-sector ATPase complex, catalytic domain	cellular_component	0.00012177	0.0020261	9	1928	65	74606	TRIAE_CS42_7BL_TGACv1_579063_AA1903600,TRIAE_CS42_1DL_TGACv1_062210_AA0210500,TRIAE_CS42_3AL_TGACv1_195562_AA0651220,TRIAE_CS42_7AL_TGACv1_559344_AA1799200,TRIAE_CS42_3B_TGACv1_221643_AA0746430,TRIAE_CS42_3DL_TGACv1_250717_AA0872310,TRIAE_CS42_1BL_TGACv1_031692_AA0118950,TRIAE_CS42_1AL_TGACv1_004040_AA0052320,TRIAE_CS42_6BS_TGACv1_514088_AA1654890
GO:0006560	proline metabolic process	biological_process	0.00012837	0.0021306	5	1928	21	74606	TRIAE_CS42_3DL_TGACv1_250063_AA0861520,TRIAE_CS42_3B_TGACv1_225182_AA0805900,TRIAE_CS42_1AL_TGACv1_000254_AA0007380,TRIAE_CS42_1AL_TGACv1_000254_AA0007370,TRIAE_CS42_5DL_TGACv1_434775_AA1441440
GO:0044249	cellular biosynthetic process	biological_process	0.00012875	0.002131	329	1928	10288	74606	TRIAE_CS42_2AL_TGACv1_094650_AA0301090,TRIAE_CS42_6BL_TGACv1_499707_AA1589630,TRIAE_CS42_7AS_TGACv1_571423_AA1847600,TRIAE_CS42_5BL_TGACv1_404481_AA1301440,TRIAE_CS42_5BL_TGACv1_406155_AA1341460,TRIAE_CS42_3B_TGACv1_223258_AA0779170,TRIAE_CS42_2DL_TGACv1_160628_AA0552420,TRIAE_CS42_1DL_TGACv1_061444_AA0195450,TRIAE_CS42_3AS_TGACv1_211158_AA0686190,TRIAE_CS42_7AS_TGACv1_572202_AA1851680,TRIAE_CS42…
GO:0006166	purine ribonucleoside salvage	biological_process	0.00012902	0.002131	3	1928	5	74606	TRIAE_CS42_6DL_TGACv1_526952_AA1695860,TRIAE_CS42_6AL_TGACv1_473321_AA1530120,TRIAE_CS42_6BL_TGACv1_499360_AA1579440
GO:0004594	pantothenate kinase activity	molecular_function	0.00013211	0.0021765	3	1928	6	74606	TRIAE_CS42_5DL_TGACv1_435540_AA1451810,TRIAE_CS42_5AL_TGACv1_374789_AA1209000,TRIAE_CS42_5BL_TGACv1_406155_AA1341460
GO:0004134	4-alpha-glucanotransferase activity	molecular_function	0.00013607	0.0022363	3	1928	6	74606	TRIAE_CS42_2AS_TGACv1_112747_AA0344470,TRIAE_CS42_2BS_TGACv1_148740_AA0494910,TRIAE_CS42_2DS_TGACv1_177436_AA0577070
GO:0009570	chloroplast stroma	cellular_component	0.00013799	0.0022624	30	1928	549	74606	TRIAE_CS42_4AS_TGACv1_306673_AA1011900,TRIAE_CS42_3B_TGACv1_222044_AA0755660,TRIAE_CS42_1BL_TGACv1_031520_AA0115500,TRIAE_CS42_7DS_TGACv1_621370_AA2013200,TRIAE_CS42_4DL_TGACv1_343812_AA1140000,TRIAE_CS42_2DL_TGACv1_159084_AA0532060,TRIAE_CS42_4BL_TGACv1_321702_AA1064290,TRIAE_CS42_4DL_TGACv1_342433_AA1113510,TRIAE_CS42_2AS_TGACv1_112739_AA0344340,TRIAE_CS42_2BL_TGACv1_129772_AA0395390,TRIAE_CS42…
GO:0019829	cation-transporting ATPase activity	molecular_function	0.00014384	0.0023525	12	1928	147	74606	TRIAE_CS42_3AL_TGACv1_195562_AA0651220,TRIAE_CS42_1DL_TGACv1_062210_AA0210500,TRIAE_CS42_7BL_TGACv1_579063_AA1903600,TRIAE_CS42_4AL_TGACv1_288269_AA0942920,TRIAE_CS42_2BL_TGACv1_129973_AA0400750,TRIAE_CS42_1AL_TGACv1_004040_AA0052320,TRIAE_CS42_1BL_TGACv1_031692_AA0118950,TRIAE_CS42_2AL_TGACv1_093051_AA0270470,TRIAE_CS42_2DL_TGACv1_159040_AA0531140,TRIAE_CS42_7AL_TGACv1_559344_AA1799200,TRIAE_CS4…
GO:0006164	purine nucleotide biosynthetic process	biological_process	0.00014493	0.0023646	15	1928	183	74606	TRIAE_CS42_1AL_TGACv1_000492_AA0013410,TRIAE_CS42_1BL_TGACv1_031692_AA0118950,TRIAE_CS42_1AL_TGACv1_004040_AA0052320,TRIAE_CS42_6DL_TGACv1_526952_AA1695860,TRIAE_CS42_6AL_TGACv1_473321_AA1530120,TRIAE_CS42_6BL_TGACv1_499360_AA1579440,TRIAE_CS42_1AL_TGACv1_000512_AA0013610,TRIAE_CS42_5BL_TGACv1_406155_AA1341460,TRIAE_CS42_1DL_TGACv1_062210_AA0210500,TRIAE_CS42_2DL_TGACv1_158421_AA0518370,TRIAE_CS4…
GO:0030140	trans-Golgi network transport vesicle	cellular_component	0.00014684	0.00239	5	1928	25	74606	TRIAE_CS42_4BS_TGACv1_328452_AA1088030,TRIAE_CS42_4AL_TGACv1_288747_AA0957130,TRIAE_CS42_7DL_TGACv1_602635_AA1963430,TRIAE_CS42_7AL_TGACv1_556695_AA1769100,TRIAE_CS42_4DS_TGACv1_362497_AA1180110
GO:0005976	polysaccharide metabolic process	biological_process	0.00015305	0.002485	32	1928	689	74606	TRIAE_CS42_5AL_TGACv1_375073_AA1215420,TRIAE_CS42_2AS_TGACv1_112747_AA0344470,TRIAE_CS42_2BS_TGACv1_148740_AA0494910,TRIAE_CS42_2AL_TGACv1_093163_AA0273760,TRIAE_CS42_1BL_TGACv1_031712_AA0119450,TRIAE_CS42_4BS_TGACv1_329796_AA1104090,TRIAE_CS42_2AS_TGACv1_116387_AA0373890,TRIAE_CS42_2DS_TGACv1_180213_AA0610440,TRIAE_CS42_2BS_TGACv1_147826_AA0487990,TRIAE_CS42_1AL_TGACv1_000384_AA0010710,TRIAE_CS4…
GO:0016832	aldehyde-lyase activity	molecular_function	0.00015665	0.0025374	6	1928	30	74606	TRIAE_CS42_7DS_TGACv1_624510_AA2061770,TRIAE_CS42_3DL_TGACv1_251713_AA0884060,TRIAE_CS42_3B_TGACv1_221609_AA0745810,TRIAE_CS42_3AL_TGACv1_196429_AA0660330,TRIAE_CS42_3DL_TGACv1_250475_AA0868810,TRIAE_CS42_7AS_TGACv1_571185_AA1845550
GO:0051188	cofactor biosynthetic process	biological_process	0.00015805	0.0025539	21	1928	343	74606	TRIAE_CS42_5BL_TGACv1_406279_AA1343630,TRIAE_CS42_7AS_TGACv1_571112_AA1844780,TRIAE_CS42_3DS_TGACv1_273835_AA0933610,TRIAE_CS42_1BL_TGACv1_030654_AA0097000,TRIAE_CS42_1DS_TGACv1_082196_AA0264140,TRIAE_CS42_6BL_TGACv1_500297_AA1602810,TRIAE_CS42_3AS_TGACv1_213440_AA0706960,TRIAE_CS42_3B_TGACv1_223441_AA0782230,TRIAE_CS42_5AL_TGACv1_376570_AA1238560,TRIAE_CS42_3DS_TGACv1_274021_AA0934410,TRIAE_CS42…
GO:0006108	malate metabolic process	biological_process	0.00015944	0.0025588	5	1928	22	74606	TRIAE_CS42_1BL_TGACv1_030950_AA0104200,TRIAE_CS42_1AL_TGACv1_002631_AA0043990,TRIAE_CS42_1DL_TGACv1_061661_AA0201230,TRIAE_CS42_1BL_TGACv1_031464_AA0114600,TRIAE_CS42_1AL_TGACv1_000087_AA0002830
GO:0031968	organelle outer membrane	cellular_component	0.00015945	0.0025588	11	1928	99	74606	TRIAE_CS42_3B_TGACv1_223525_AA0783520,TRIAE_CS42_3B_TGACv1_223093_AA0776380,TRIAE_CS42_3B_TGACv1_222757_AA0770040,TRIAE_CS42_4BL_TGACv1_321242_AA1057770,TRIAE_CS42_4DL_TGACv1_345350_AA1152790,TRIAE_CS42_3AL_TGACv1_194730_AA0638300,TRIAE_CS42_4DL_TGACv1_343137_AA1130350,TRIAE_CS42_3B_TGACv1_222044_AA0755670,TRIAE_CS42_4BL_TGACv1_321851_AA1066240,TRIAE_CS42_3DL_TGACv1_252453_AA0890080,TRIAE_CS42_5A…
GO:0005525	GTP binding	molecular_function	0.00016026	0.0025588	32	1928	621	74606	TRIAE_CS42_2AS_TGACv1_112051_AA0328780,TRIAE_CS42_1DS_TGACv1_080446_AA0248170,TRIAE_CS42_1AL_TGACv1_001070_AA0024450,TRIAE_CS42_1AL_TGACv1_000073_AA0002580,TRIAE_CS42_1BL_TGACv1_030590_AA0094940,TRIAE_CS42_3B_TGACv1_223611_AA0784530,TRIAE_CS42_1DL_TGACv1_061057_AA0183360,TRIAE_CS42_1BL_TGACv1_030978_AA0104970,TRIAE_CS42_U_TGACv1_644112_AA2137260,TRIAE_CS42_1AS_TGACv1_018951_AA0056810,TRIAE_CS42_1…
GO:0019001	guanyl nucleotide binding	molecular_function	0.00016026	0.0025588	32	1928	621	74606	TRIAE_CS42_4DS_TGACv1_361934_AA1174490,TRIAE_CS42_5DL_TGACv1_433411_AA1412390,TRIAE_CS42_6DS_TGACv1_542706_AA1728340,TRIAE_CS42_3B_TGACv1_222072_AA0756730,TRIAE_CS42_1DL_TGACv1_062495_AA0215330,TRIAE_CS42_3AL_TGACv1_194964_AA0642840,TRIAE_CS42_U_TGACv1_645386_AA2144200,TRIAE_CS42_4BL_TGACv1_321429_AA1060300,TRIAE_CS42_2DS_TGACv1_177177_AA0568030,TRIAE_CS42_3DS_TGACv1_272355_AA0919480,TRIAE_CS42_3…
GO:0032561	guanyl ribonucleotide binding	molecular_function	0.00016026	0.0025588	32	1928	621	74606	TRIAE_CS42_5BL_TGACv1_406442_AA1345570,TRIAE_CS42_3AL_TGACv1_197715_AA0667040,TRIAE_CS42_4AL_TGACv1_290422_AA0985250,TRIAE_CS42_3AL_TGACv1_195978_AA0656110,TRIAE_CS42_3DL_TGACv1_250988_AA0875910,TRIAE_CS42_3DL_TGACv1_249210_AA0841520,TRIAE_CS42_3DS_TGACv1_272355_AA0919480,TRIAE_CS42_4BL_TGACv1_321429_AA1060300,TRIAE_CS42_2DS_TGACv1_177177_AA0568030,TRIAE_CS42_U_TGACv1_645386_AA2144200,TRIAE_CS42_…
GO:0015291	secondary active transmembrane transporter activity	molecular_function	0.00017005	0.0027087	23	1928	439	74606	TRIAE_CS42_4DS_TGACv1_361391_AA1166860,TRIAE_CS42_4BS_TGACv1_329699_AA1103360,TRIAE_CS42_3AS_TGACv1_210574_AA0675360,TRIAE_CS42_2BL_TGACv1_129391_AA0381430,TRIAE_CS42_4BL_TGACv1_320288_AA1034040,TRIAE_CS42_2DL_TGACv1_158910_AA0528600,TRIAE_CS42_2BL_TGACv1_129857_AA0398180,TRIAE_CS42_4AS_TGACv1_306580_AA1010510,TRIAE_CS42_7AL_TGACv1_557109_AA1776600,TRIAE_CS42_5BL_TGACv1_405907_AA1337450,TRIAE_CS4…
GO:0042625	ATPase activity, coupled to transmembrane movement of ions	molecular_function	0.00017477	0.0027773	12	1928	150	74606	TRIAE_CS42_2DL_TGACv1_159040_AA0531140,TRIAE_CS42_3DL_TGACv1_250717_AA0872310,TRIAE_CS42_3B_TGACv1_221643_AA0746430,TRIAE_CS42_7AL_TGACv1_559344_AA1799200,TRIAE_CS42_1AL_TGACv1_004040_AA0052320,TRIAE_CS42_1BL_TGACv1_031692_AA0118950,TRIAE_CS42_2AL_TGACv1_093051_AA0270470,TRIAE_CS42_7BL_TGACv1_579063_AA1903600,TRIAE_CS42_4AL_TGACv1_288269_AA0942920,TRIAE_CS42_2BL_TGACv1_129973_AA0400750,TRIAE_CS42…
GO:0009501	amyloplast	cellular_component	0.00018229	0.00289	5	1928	26	74606	TRIAE_CS42_1AL_TGACv1_000384_AA0010710,TRIAE_CS42_1BL_TGACv1_031136_AA0108420,TRIAE_CS42_2BL_TGACv1_131614_AA0429850,TRIAE_CS42_2AL_TGACv1_093163_AA0273760,TRIAE_CS42_1DL_TGACv1_062182_AA0210070
GO:0009743	response to carbohydrate	biological_process	0.00018983	0.0030025	8	1928	71	74606	TRIAE_CS42_7DS_TGACv1_621370_AA2013200,TRIAE_CS42_U_TGACv1_640995_AA2081800,TRIAE_CS42_1DL_TGACv1_061317_AA0192320,TRIAE_CS42_7AL_TGACv1_557134_AA1777250,TRIAE_CS42_1AL_TGACv1_001119_AA0025400,TRIAE_CS42_1BL_TGACv1_031944_AA0123110,TRIAE_CS42_5DL_TGACv1_434775_AA1441440,TRIAE_CS42_7BS_TGACv1_593453_AA1951720
GO:0048268	clathrin coat assembly	biological_process	0.00019081	0.0030109	6	1928	41	74606	TRIAE_CS42_4BS_TGACv1_328452_AA1088030,TRIAE_CS42_4AL_TGACv1_288747_AA0957130,TRIAE_CS42_3DL_TGACv1_250339_AA0866430,TRIAE_CS42_4DS_TGACv1_362497_AA1180110,TRIAE_CS42_3B_TGACv1_220835_AA0720860,TRIAE_CS42_3AL_TGACv1_194328_AA0631110
GO:0006576	cellular biogenic amine metabolic process	biological_process	0.0001923	0.0030273	15	1928	206	74606	TRIAE_CS42_1BL_TGACv1_032207_AA0126810,TRIAE_CS42_3B_TGACv1_221027_AA0727340,TRIAE_CS42_5AL_TGACv1_375039_AA1214530,TRIAE_CS42_2DS_TGACv1_178228_AA0593010,TRIAE_CS42_2BS_TGACv1_147224_AA0480120,TRIAE_CS42_1AL_TGACv1_000734_AA0018090,TRIAE_CS42_7BL_TGACv1_577759_AA1882740,TRIAE_CS42_5AL_TGACv1_375327_AA1219960,TRIAE_CS42_3DL_TGACv1_254806_AA0896680,TRIAE_CS42_3AL_TGACv1_196405_AA0660080,TRIAE_CS42…
GO:0051082	unfolded protein binding	molecular_function	0.0001958	0.0030752	13	1928	165	74606	TRIAE_CS42_5DL_TGACv1_435534_AA1451760,TRIAE_CS42_7BS_TGACv1_593884_AA1954980,TRIAE_CS42_4DL_TGACv1_343081_AA1129160,TRIAE_CS42_4BL_TGACv1_322527_AA1071800,TRIAE_CS42_3DS_TGACv1_272389_AA0920080,TRIAE_CS42_4AS_TGACv1_307431_AA1020380,TRIAE_CS42_1AL_TGACv1_000591_AA0015400,TRIAE_CS42_1DL_TGACv1_061096_AA0185030,TRIAE_CS42_1BL_TGACv1_031589_AA0116600,TRIAE_CS42_5AL_TGACv1_373991_AA1186860,TRIAE_CS4…
GO:0032958	inositol phosphate biosynthetic process	biological_process	0.00019984	0.0031313	4	1928	13	74606	TRIAE_CS42_7DL_TGACv1_603779_AA1989110,TRIAE_CS42_5AL_TGACv1_376140_AA1232710,TRIAE_CS42_7AL_TGACv1_556888_AA1772870,TRIAE_CS42_5DL_TGACv1_433402_AA1412060
GO:0031984	organelle subcompartment	cellular_component	0.00020162	0.0031515	38	1928	677	74606	TRIAE_CS42_4DL_TGACv1_342971_AA1126430,TRIAE_CS42_1DL_TGACv1_061593_AA0199390,TRIAE_CS42_6BS_TGACv1_514208_AA1656990,TRIAE_CS42_6DS_TGACv1_543042_AA1734510,TRIAE_CS42_6AS_TGACv1_485824_AA1552850,TRIAE_CS42_6AS_TGACv1_485824_AA1552860,TRIAE_CS42_7BS_TGACv1_592029_AA1928680,TRIAE_CS42_6AS_TGACv1_485824_AA1552840,TRIAE_CS42_2BL_TGACv1_129772_AA0395390,TRIAE_CS42_1DL_TGACv1_061593_AA0199400,TRIAE_CS4…
GO:0006007	glucose catabolic process	biological_process	0.00020274	0.0031515	3	1928	6	74606	TRIAE_CS42_3B_TGACv1_222141_AA0758150,TRIAE_CS42_3AL_TGACv1_196039_AA0656760,TRIAE_CS42_3DL_TGACv1_251020_AA0876220
GO:0042126	nitrate metabolic process	biological_process	0.00020348	0.0031515	4	1928	15	74606	TRIAE_CS42_6DS_TGACv1_543770_AA1744010,TRIAE_CS42_7AS_TGACv1_569986_AA1828160,TRIAE_CS42_7DS_TGACv1_622272_AA2036850,TRIAE_CS42_6AS_TGACv1_486190_AA1557980
GO:0042128	nitrate assimilation	biological_process	0.00020348	0.0031515	4	1928	15	74606	TRIAE_CS42_6AS_TGACv1_486190_AA1557980,TRIAE_CS42_7DS_TGACv1_622272_AA2036850,TRIAE_CS42_7AS_TGACv1_569986_AA1828160,TRIAE_CS42_6DS_TGACv1_543770_AA1744010
GO:2001057	reactive nitrogen species metabolic process	biological_process	0.00020348	0.0031515	4	1928	15	74606	TRIAE_CS42_6DS_TGACv1_543770_AA1744010,TRIAE_CS42_7AS_TGACv1_569986_AA1828160,TRIAE_CS42_7DS_TGACv1_622272_AA2036850,TRIAE_CS42_6AS_TGACv1_486190_AA1557980
GO:0004421	hydroxymethylglutaryl-CoA synthase activity	molecular_function	0.00020644	0.00319	3	1928	6	74606	TRIAE_CS42_7DS_TGACv1_623117_AA2049760,TRIAE_CS42_5AL_TGACv1_378173_AA1251720,TRIAE_CS42_7BS_TGACv1_591893_AA1924780
GO:0002682	regulation of immune system process	biological_process	0.00020925	0.0032261	9	1928	81	74606	TRIAE_CS42_3B_TGACv1_229631_AA0828970,TRIAE_CS42_1BL_TGACv1_032262_AA0127620,TRIAE_CS42_1BL_TGACv1_030567_AA0094200,TRIAE_CS42_1AL_TGACv1_002619_AA0043740,TRIAE_CS42_1AL_TGACv1_002853_AA0045580,TRIAE_CS42_1DL_TGACv1_062362_AA0213270,TRIAE_CS42_1BL_TGACv1_034437_AA0144510,TRIAE_CS42_1DL_TGACv1_062962_AA0222290,TRIAE_CS42_1DL_TGACv1_061262_AA0190390
GO:0046961	proton-transporting ATPase activity, rotational mechanism	molecular_function	0.00020985	0.0032279	5	1928	20	74606	TRIAE_CS42_3DL_TGACv1_250717_AA0872310,TRIAE_CS42_3B_TGACv1_221643_AA0746430,TRIAE_CS42_7AL_TGACv1_559344_AA1799200,TRIAE_CS42_7BL_TGACv1_579063_AA1903600,TRIAE_CS42_3AL_TGACv1_195562_AA0651220
GO:0004013	adenosylhomocysteinase activity	molecular_function	0.00021718	0.0033105	3	1928	6	74606	TRIAE_CS42_2DL_TGACv1_158777_AA0526010,TRIAE_CS42_2AL_TGACv1_094486_AA0298610,TRIAE_CS42_2AL_TGACv1_094077_AA0292200
GO:0016801	hydrolase activity, acting on ether bonds	molecular_function	0.00021718	0.0033105	3	1928	6	74606	TRIAE_CS42_2AL_TGACv1_094486_AA0298610,TRIAE_CS42_2DL_TGACv1_158777_AA0526010,TRIAE_CS42_2AL_TGACv1_094077_AA0292200
GO:0016802	trialkylsulfonium hydrolase activity	molecular_function	0.00021718	0.0033105	3	1928	6	74606	TRIAE_CS42_2DL_TGACv1_158777_AA0526010,TRIAE_CS42_2AL_TGACv1_094486_AA0298610,TRIAE_CS42_2AL_TGACv1_094077_AA0292200
GO:0019510	S-adenosylhomocysteine catabolic process	biological_process	0.00021718	0.0033105	3	1928	6	74606	TRIAE_CS42_2AL_TGACv1_094077_AA0292200,TRIAE_CS42_2AL_TGACv1_094486_AA0298610,TRIAE_CS42_2DL_TGACv1_158777_AA0526010
GO:0016836	hydro-lyase activity	molecular_function	0.00022093	0.00336	14	1928	174	74606	TRIAE_CS42_3DL_TGACv1_253234_AA0893850,TRIAE_CS42_7AL_TGACv1_557898_AA1787490,TRIAE_CS42_5AS_TGACv1_394202_AA1278730,TRIAE_CS42_U_TGACv1_641465_AA2095880,TRIAE_CS42_5DL_TGACv1_433836_AA1423410,TRIAE_CS42_5DS_TGACv1_457334_AA1485300,TRIAE_CS42_2DS_TGACv1_179678_AA0608530,TRIAE_CS42_7BL_TGACv1_577759_AA1882740,TRIAE_CS42_2BS_TGACv1_146384_AA0464010,TRIAE_CS42_5AL_TGACv1_375039_AA1214530,TRIAE_CS42_…
GO:0009915	phloem sucrose loading	biological_process	0.00022711	0.0034461	3	1928	6	74606	TRIAE_CS42_7AL_TGACv1_559693_AA1800520,TRIAE_CS42_7DL_TGACv1_604116_AA1994020,TRIAE_CS42_7BL_TGACv1_577849_AA1884560
GO:1902582	single-organism intracellular transport	biological_process	0.00023419	0.0035456	27	1928	480	74606	TRIAE_CS42_4BL_TGACv1_320261_AA1032800,TRIAE_CS42_2BL_TGACv1_130310_AA0408540,TRIAE_CS42_2BS_TGACv1_146389_AA0464090,TRIAE_CS42_5DS_TGACv1_458693_AA1494370,TRIAE_CS42_6AS_TGACv1_486953_AA1566790,TRIAE_CS42_4BL_TGACv1_321242_AA1057770,TRIAE_CS42_3B_TGACv1_223093_AA0776380,TRIAE_CS42_2BL_TGACv1_132610_AA0438600,TRIAE_CS42_5DL_TGACv1_434879_AA1443050,TRIAE_CS42_7AS_TGACv1_570466_AA1836110,TRIAE_CS42…
GO:0008168	methyltransferase activity	molecular_function	0.00023499	0.0035496	41	1928	920	74606	TRIAE_CS42_U_TGACv1_643385_AA2131440,TRIAE_CS42_1DL_TGACv1_061943_AA0206090,TRIAE_CS42_5BS_TGACv1_423279_AA1373080,TRIAE_CS42_3DL_TGACv1_249609_AA0852350,TRIAE_CS42_1BL_TGACv1_031722_AA0119730,TRIAE_CS42_6AS_TGACv1_485618_AA1548920,TRIAE_CS42_7DL_TGACv1_603606_AA1986230,TRIAE_CS42_4DS_TGACv1_361403_AA1167180,TRIAE_CS42_4AS_TGACv1_307275_AA1019080,TRIAE_CS42_3AS_TGACv1_210938_AA0681720,TRIAE_CS42_…
GO:0019751	polyol metabolic process	biological_process	0.00023627	0.003561	7	1928	52	74606	TRIAE_CS42_7DL_TGACv1_602694_AA1965500,TRIAE_CS42_5DL_TGACv1_433402_AA1412060,TRIAE_CS42_4AL_TGACv1_288528_AA0951160,TRIAE_CS42_7DL_TGACv1_603779_AA1989110,TRIAE_CS42_4BS_TGACv1_328490_AA1088680,TRIAE_CS42_5AL_TGACv1_376140_AA1232710,TRIAE_CS42_7AL_TGACv1_556888_AA1772870
GO:0045550	geranylgeranyl reductase activity	molecular_function	0.00024009	0.0036105	3	1928	6	74606	TRIAE_CS42_3DS_TGACv1_273835_AA0933610,TRIAE_CS42_3B_TGACv1_224606_AA0798680,TRIAE_CS42_3AS_TGACv1_211390_AA0689620
GO:0010363	regulation of plant-type hypersensitive response	biological_process	0.00024336	0.0036514	3	1928	5	74606	TRIAE_CS42_1DL_TGACv1_062362_AA0213270,TRIAE_CS42_1AL_TGACv1_002853_AA0045580,TRIAE_CS42_1BL_TGACv1_030567_AA0094200
GO:0042555	MCM complex	cellular_component	0.00025185	0.0037705	4	1928	17	74606	TRIAE_CS42_6DL_TGACv1_527835_AA1709090,TRIAE_CS42_5AS_TGACv1_393478_AA1272980,TRIAE_CS42_5BS_TGACv1_423792_AA1383390,TRIAE_CS42_1AS_TGACv1_019881_AA0072380
GO:0046474	glycerophospholipid biosynthetic process	biological_process	0.00025493	0.0038081	10	1928	113	74606	TRIAE_CS42_1BL_TGACv1_032207_AA0126810,TRIAE_CS42_3B_TGACv1_221027_AA0727340,TRIAE_CS42_2DS_TGACv1_179608_AA0608200,TRIAE_CS42_U_TGACv1_643011_AA2126070,TRIAE_CS42_1AL_TGACv1_000734_AA0018090,TRIAE_CS42_2BS_TGACv1_146926_AA0475500,TRIAE_CS42_1DL_TGACv1_062419_AA0214280,TRIAE_CS42_1DL_TGACv1_063094_AA0223830,TRIAE_CS42_3AL_TGACv1_196405_AA0660080,TRIAE_CS42_3DL_TGACv1_254806_AA0896680
GO:0007010	cytoskeleton organization	biological_process	0.00026063	0.0038497	20	1928	346	74606	TRIAE_CS42_6DS_TGACv1_542706_AA1728340,TRIAE_CS42_1BS_TGACv1_049965_AA0164830,TRIAE_CS42_4DS_TGACv1_362799_AA1182230,TRIAE_CS42_3AL_TGACv1_194824_AA0640140,TRIAE_CS42_5DL_TGACv1_433016_AA1398230,TRIAE_CS42_5DS_TGACv1_457254_AA1484340,TRIAE_CS42_4BS_TGACv1_329163_AA1098380,TRIAE_CS42_6AL_TGACv1_471163_AA1503860,TRIAE_CS42_1AL_TGACv1_000051_AA0001350,TRIAE_CS42_1AS_TGACv1_019520_AA0067630,TRIAE_CS4…
GO:0006241	CTP biosynthetic process	biological_process	0.00026115	0.0038497	6	1928	36	74606	TRIAE_CS42_3DL_TGACv1_249279_AA0843940,TRIAE_CS42_3B_TGACv1_223258_AA0779170,TRIAE_CS42_3AL_TGACv1_194109_AA0626660,TRIAE_CS42_1DL_TGACv1_061176_AA0187850,TRIAE_CS42_1BL_TGACv1_030377_AA0088540,TRIAE_CS42_1AL_TGACv1_000492_AA0013410
GO:0009148	pyrimidine nucleoside triphosphate biosynthetic process	biological_process	0.00026115	0.0038497	6	1928	36	74606	TRIAE_CS42_3DL_TGACv1_249279_AA0843940,TRIAE_CS42_1BL_TGACv1_030377_AA0088540,TRIAE_CS42_1AL_TGACv1_000492_AA0013410,TRIAE_CS42_1DL_TGACv1_061176_AA0187850,TRIAE_CS42_3AL_TGACv1_194109_AA0626660,TRIAE_CS42_3B_TGACv1_223258_AA0779170
GO:0009208	pyrimidine ribonucleoside triphosphate metabolic process	biological_process	0.00026115	0.0038497	6	1928	36	74606	TRIAE_CS42_1DL_TGACv1_061176_AA0187850,TRIAE_CS42_3AL_TGACv1_194109_AA0626660,TRIAE_CS42_3B_TGACv1_223258_AA0779170,TRIAE_CS42_1BL_TGACv1_030377_AA0088540,TRIAE_CS42_1AL_TGACv1_000492_AA0013410,TRIAE_CS42_3DL_TGACv1_249279_AA0843940
GO:0009209	pyrimidine ribonucleoside triphosphate biosynthetic process	biological_process	0.00026115	0.0038497	6	1928	36	74606	TRIAE_CS42_3B_TGACv1_223258_AA0779170,TRIAE_CS42_1DL_TGACv1_061176_AA0187850,TRIAE_CS42_3AL_TGACv1_194109_AA0626660,TRIAE_CS42_1BL_TGACv1_030377_AA0088540,TRIAE_CS42_1AL_TGACv1_000492_AA0013410,TRIAE_CS42_3DL_TGACv1_249279_AA0843940
GO:0046036	CTP metabolic process	biological_process	0.00026115	0.0038497	6	1928	36	74606	TRIAE_CS42_3DL_TGACv1_249279_AA0843940,TRIAE_CS42_3B_TGACv1_223258_AA0779170,TRIAE_CS42_1DL_TGACv1_061176_AA0187850,TRIAE_CS42_3AL_TGACv1_194109_AA0626660,TRIAE_CS42_1AL_TGACv1_000492_AA0013410,TRIAE_CS42_1BL_TGACv1_030377_AA0088540
GO:0008320	protein transmembrane transporter activity	molecular_function	0.00026814	0.0039355	5	1928	19	74606	TRIAE_CS42_4BL_TGACv1_321242_AA1057770,TRIAE_CS42_4DL_TGACv1_343137_AA1130350,TRIAE_CS42_6DS_TGACv1_542697_AA1728230,TRIAE_CS42_6AS_TGACv1_486953_AA1566790,TRIAE_CS42_6BS_TGACv1_514140_AA1655890
GO:0022884	macromolecule transmembrane transporter activity	molecular_function	0.00026814	0.0039355	5	1928	19	74606	TRIAE_CS42_4BL_TGACv1_321242_AA1057770,TRIAE_CS42_6AS_TGACv1_486953_AA1566790,TRIAE_CS42_4DL_TGACv1_343137_AA1130350,TRIAE_CS42_6DS_TGACv1_542697_AA1728230,TRIAE_CS42_6BS_TGACv1_514140_AA1655890
GO:0042398	cellular modified amino acid biosynthetic process	biological_process	0.00027327	0.0040021	8	1928	68	74606	TRIAE_CS42_6BL_TGACv1_499577_AA1586520,TRIAE_CS42_6DL_TGACv1_526382_AA1681340,TRIAE_CS42_3DS_TGACv1_274021_AA0934410,TRIAE_CS42_3AS_TGACv1_213440_AA0706960,TRIAE_CS42_3B_TGACv1_223441_AA0782230,TRIAE_CS42_6AL_TGACv1_471945_AA1516140,TRIAE_CS42_6BL_TGACv1_500297_AA1602810,TRIAE_CS42_6AL_TGACv1_475648_AA1536640
GO:0004069	L-aspartate:2-oxoglutarate aminotransferase activity	molecular_function	0.0002775	0.0040509	4	1928	15	74606	TRIAE_CS42_6BS_TGACv1_513449_AA1641870,TRIAE_CS42_1BL_TGACv1_031520_AA0115500,TRIAE_CS42_6DS_TGACv1_543365_AA1739120,TRIAE_CS42_7BL_TGACv1_581547_AA1917420
GO:0005657	replication fork	cellular_component	0.00027794	0.0040509	4	1928	14	74606	TRIAE_CS42_1DL_TGACv1_061346_AA0192790,TRIAE_CS42_4AS_TGACv1_306214_AA1004350,TRIAE_CS42_4BL_TGACv1_321871_AA1066490,TRIAE_CS42_4DL_TGACv1_342972_AA1126540
GO:0009627	systemic acquired resistance	biological_process	0.00027842	0.0040509	6	1928	35	74606	TRIAE_CS42_1BL_TGACv1_034437_AA0144510,TRIAE_CS42_3B_TGACv1_229631_AA0828970,TRIAE_CS42_1AL_TGACv1_002619_AA0043740,TRIAE_CS42_1BL_TGACv1_032262_AA0127620,TRIAE_CS42_1DL_TGACv1_061262_AA0190390,TRIAE_CS42_1DL_TGACv1_062962_AA0222290
GO:0004316	3-oxoacyl-[acyl-carrier-protein] reductase (NADPH) activity	molecular_function	0.00028363	0.0041179	3	1928	6	74606	TRIAE_CS42_2DL_TGACv1_162478_AA0562870,TRIAE_CS42_2BL_TGACv1_129465_AA0384880,TRIAE_CS42_2AL_TGACv1_093558_AA0282560
GO:0009165	nucleotide biosynthetic process	biological_process	0.00028742	0.0041638	19	1928	293	74606	TRIAE_CS42_3AL_TGACv1_194109_AA0626660,TRIAE_CS42_3B_TGACv1_223258_AA0779170,TRIAE_CS42_1AL_TGACv1_004040_AA0052320,TRIAE_CS42_1BL_TGACv1_031692_AA0118950,TRIAE_CS42_1AL_TGACv1_000512_AA0013610,TRIAE_CS42_5BL_TGACv1_406155_AA1341460,TRIAE_CS42_6BL_TGACv1_499360_AA1579440,TRIAE_CS42_1DL_TGACv1_061176_AA0187850,TRIAE_CS42_5AL_TGACv1_374789_AA1209000,TRIAE_CS42_1BL_TGACv1_030377_AA0088540,TRIAE_CS42…
GO:0006644	phospholipid metabolic process	biological_process	0.00030287	0.0043783	20	1928	377	74606	TRIAE_CS42_3B_TGACv1_222617_AA0767980,TRIAE_CS42_1DL_TGACv1_063094_AA0223830,TRIAE_CS42_1DL_TGACv1_062419_AA0214280,TRIAE_CS42_2BS_TGACv1_146926_AA0475500,TRIAE_CS42_1AL_TGACv1_000734_AA0018090,TRIAE_CS42_2DS_TGACv1_179608_AA0608200,TRIAE_CS42_4BS_TGACv1_328490_AA1088680,TRIAE_CS42_U_TGACv1_641722_AA2102520,TRIAE_CS42_1BL_TGACv1_032207_AA0126810,TRIAE_CS42_3AL_TGACv1_196405_AA0660080,TRIAE_CS42_4…
GO:0034357	photosynthetic membrane	cellular_component	0.00030815	0.004445	37	1928	604	74606	TRIAE_CS42_3DS_TGACv1_272293_AA0918520,TRIAE_CS42_1AL_TGACv1_009365_AA0055660,TRIAE_CS42_1BS_TGACv1_050006_AA0165760,TRIAE_CS42_6BS_TGACv1_514827_AA1664770,TRIAE_CS42_1AL_TGACv1_000383_AA0010660,TRIAE_CS42_5BL_TGACv1_405241_AA1323080,TRIAE_CS42_6AS_TGACv1_485824_AA1552830,TRIAE_CS42_7BS_TGACv1_592029_AA1928690,TRIAE_CS42_7DS_TGACv1_621370_AA2013200,TRIAE_CS42_1DS_TGACv1_082951_AA0265140,TRIAE_CS4…
GO:1901293	nucleoside phosphate biosynthetic process	biological_process	0.00032124	0.0046239	19	1928	296	74606	TRIAE_CS42_6DL_TGACv1_526952_AA1695860,TRIAE_CS42_6AL_TGACv1_473321_AA1530120,TRIAE_CS42_1AL_TGACv1_000492_AA0013410,TRIAE_CS42_2BS_TGACv1_146900_AA0475120,TRIAE_CS42_1DL_TGACv1_062210_AA0210500,TRIAE_CS42_2DL_TGACv1_158421_AA0518370,TRIAE_CS42_1DL_TGACv1_063573_AA0228750,TRIAE_CS42_6BL_TGACv1_499360_AA1579440,TRIAE_CS42_1AL_TGACv1_000512_AA0013610,TRIAE_CS42_5BL_TGACv1_406155_AA1341460,TRIAE_CS4…
GO:0016829	lyase activity	molecular_function	0.00032417	0.0046561	42	1928	940	74606	TRIAE_CS42_3B_TGACv1_222610_AA0767770,TRIAE_CS42_7AS_TGACv1_571185_AA1845550,TRIAE_CS42_1BS_TGACv1_049382_AA0151450,TRIAE_CS42_7BS_TGACv1_592026_AA1928570,TRIAE_CS42_7AL_TGACv1_557898_AA1787490,TRIAE_CS42_2DL_TGACv1_158004_AA0505620,TRIAE_CS42_4DL_TGACv1_343985_AA1142210,TRIAE_CS42_5BL_TGACv1_404165_AA1287780,TRIAE_CS42_3DS_TGACv1_272233_AA0917470,TRIAE_CS42_2DS_TGACv1_179678_AA0608530,TRIAE_CS42…
GO:0009638	phototropism	biological_process	0.00032894	0.0047146	4	1928	19	74606	TRIAE_CS42_4DS_TGACv1_361424_AA1167750,TRIAE_CS42_U_TGACv1_643904_AA2135890,TRIAE_CS42_4BS_TGACv1_330248_AA1106770,TRIAE_CS42_4AL_TGACv1_289938_AA0979140
GO:0030042	actin filament depolymerization	biological_process	0.00033166	0.0047349	7	1928	41	74606	TRIAE_CS42_5BL_TGACv1_406522_AA1346490,TRIAE_CS42_1BS_TGACv1_049965_AA0164830,TRIAE_CS42_4DL_TGACv1_342367_AA1111630,TRIAE_CS42_4AS_TGACv1_307317_AA1019370,TRIAE_CS42_5DL_TGACv1_433016_AA1398230,TRIAE_CS42_5AL_TGACv1_375015_AA1213980,TRIAE_CS42_4BS_TGACv1_329163_AA1098380
GO:0006901	vesicle coating	biological_process	0.00033176	0.0047349	6	1928	47	74606	TRIAE_CS42_4DS_TGACv1_362497_AA1180110,TRIAE_CS42_3AL_TGACv1_194328_AA0631110,TRIAE_CS42_3B_TGACv1_220835_AA0720860,TRIAE_CS42_4BS_TGACv1_328452_AA1088030,TRIAE_CS42_4AL_TGACv1_288747_AA0957130,TRIAE_CS42_3DL_TGACv1_250339_AA0866430
GO:0006275	regulation of DNA replication	biological_process	0.00034912	0.004972	6	1928	37	74606	TRIAE_CS42_6DL_TGACv1_526389_AA1681790,TRIAE_CS42_4BL_TGACv1_321351_AA1059370,TRIAE_CS42_2BL_TGACv1_131506_AA0428640,TRIAE_CS42_2DL_TGACv1_159200_AA0534260,TRIAE_CS42_U_TGACv1_643385_AA2131440,TRIAE_CS42_2AL_TGACv1_096359_AA0318830
GO:0051261	protein depolymerization	biological_process	0.00035778	0.0050846	7	1928	42	74606	TRIAE_CS42_4BS_TGACv1_329163_AA1098380,TRIAE_CS42_4DL_TGACv1_342367_AA1111630,TRIAE_CS42_4AS_TGACv1_307317_AA1019370,TRIAE_CS42_5DL_TGACv1_433016_AA1398230,TRIAE_CS42_5AL_TGACv1_375015_AA1213980,TRIAE_CS42_5BL_TGACv1_406522_AA1346490,TRIAE_CS42_1BS_TGACv1_049965_AA0164830
GO:0015301	anion:anion antiporter activity	molecular_function	0.00036537	0.0051713	5	1928	29	74606	TRIAE_CS42_5BL_TGACv1_405907_AA1337450,TRIAE_CS42_3B_TGACv1_223199_AA0777850,TRIAE_CS42_3AS_TGACv1_212675_AA0702590,TRIAE_CS42_5AL_TGACv1_374188_AA1192880,TRIAE_CS42_5DL_TGACv1_432946_AA1395680
GO:0006636	unsaturated fatty acid biosynthetic process	biological_process	0.00036619	0.0051713	3	1928	7	74606	TRIAE_CS42_7DL_TGACv1_604116_AA1994020,TRIAE_CS42_7AL_TGACv1_559693_AA1800520,TRIAE_CS42_7BL_TGACv1_577849_AA1884560
GO:0033559	unsaturated fatty acid metabolic process	biological_process	0.00036619	0.0051713	3	1928	7	74606	TRIAE_CS42_7DL_TGACv1_604116_AA1994020,TRIAE_CS42_7AL_TGACv1_559693_AA1800520,TRIAE_CS42_7BL_TGACv1_577849_AA1884560
GO:0071941	nitrogen cycle metabolic process	biological_process	0.00037571	0.0052946	4	1928	18	74606	TRIAE_CS42_6DS_TGACv1_543770_AA1744010,TRIAE_CS42_7DS_TGACv1_622272_AA2036850,TRIAE_CS42_7AS_TGACv1_569986_AA1828160,TRIAE_CS42_6AS_TGACv1_486190_AA1557980
GO:0003779	actin binding	molecular_function	0.00038219	0.0053747	14	1928	205	74606	TRIAE_CS42_7DS_TGACv1_621620_AA2021340,TRIAE_CS42_4AL_TGACv1_291018_AA0991380,TRIAE_CS42_3DS_TGACv1_271667_AA0905120,TRIAE_CS42_4AS_TGACv1_307317_AA1019370,TRIAE_CS42_1BS_TGACv1_051077_AA0177630,TRIAE_CS42_4DL_TGACv1_342367_AA1111630,TRIAE_CS42_5AL_TGACv1_375015_AA1213980,TRIAE_CS42_5BL_TGACv1_406522_AA1346490,TRIAE_CS42_1BS_TGACv1_049965_AA0164830,TRIAE_CS42_5DS_TGACv1_457254_AA1484340,TRIAE_CS4…
GO:0019205	nucleobase-containing compound kinase activity	molecular_function	0.00040219	0.0056442	9	1928	83	74606	TRIAE_CS42_1BL_TGACv1_030377_AA0088540,TRIAE_CS42_U_TGACv1_642445_AA2117740,TRIAE_CS42_5BS_TGACv1_424804_AA1391850,TRIAE_CS42_1DL_TGACv1_061176_AA0187850,TRIAE_CS42_2BS_TGACv1_146900_AA0475120,TRIAE_CS42_1AL_TGACv1_000492_AA0013410,TRIAE_CS42_6DL_TGACv1_526952_AA1695860,TRIAE_CS42_6BL_TGACv1_499360_AA1579440,TRIAE_CS42_6AL_TGACv1_473321_AA1530120
GO:0009926	auxin polar transport	biological_process	0.00040518	0.0056548	6	1928	41	74606	TRIAE_CS42_7BS_TGACv1_591976_AA1927160,TRIAE_CS42_U_TGACv1_640854_AA2077410,TRIAE_CS42_4BS_TGACv1_329163_AA1098380,TRIAE_CS42_7DS_TGACv1_623153_AA2050180,TRIAE_CS42_4DL_TGACv1_342367_AA1111630,TRIAE_CS42_4AS_TGACv1_307317_AA1019370
GO:0004470	malic enzyme activity	molecular_function	0.00040547	0.0056548	4	1928	17	74606	TRIAE_CS42_2AS_TGACv1_112185_AA0332560,TRIAE_CS42_1DL_TGACv1_062583_AA0216850,TRIAE_CS42_1AL_TGACv1_000369_AA0010430,TRIAE_CS42_1BL_TGACv1_030411_AA0089860
GO:0004471	malate dehydrogenase (decarboxylating) (NAD+) activity	molecular_function	0.00040547	0.0056548	4	1928	17	74606	TRIAE_CS42_1BL_TGACv1_030411_AA0089860,TRIAE_CS42_1AL_TGACv1_000369_AA0010430,TRIAE_CS42_1DL_TGACv1_062583_AA0216850,TRIAE_CS42_2AS_TGACv1_112185_AA0332560
GO:0004337	geranyltranstransferase activity	molecular_function	0.00040852	0.0056855	3	1928	7	74606	TRIAE_CS42_1AL_TGACv1_002642_AA0044130,TRIAE_CS42_1DL_TGACv1_061444_AA0195450,TRIAE_CS42_1BL_TGACv1_031194_AA0109500
GO:0006820	anion transport	biological_process	0.00043684	0.006067	22	1928	422	74606	TRIAE_CS42_4DL_TGACv1_342488_AA1114970,TRIAE_CS42_3B_TGACv1_222757_AA0770040,TRIAE_CS42_4AL_TGACv1_289623_AA0974220,TRIAE_CS42_3B_TGACv1_223199_AA0777850,TRIAE_CS42_5DL_TGACv1_432946_AA1395680,TRIAE_CS42_3AS_TGACv1_212675_AA0702590,TRIAE_CS42_1BL_TGACv1_031047_AA0106660,TRIAE_CS42_5AL_TGACv1_374188_AA1192880,TRIAE_CS42_4AS_TGACv1_306580_AA1010500,TRIAE_CS42_5AL_TGACv1_378731_AA1254390,TRIAE_CS42_…
GO:0009106	lipoate metabolic process	biological_process	0.00044242	0.0060941	3	1928	7	74606	TRIAE_CS42_1AL_TGACv1_000132_AA0004290,TRIAE_CS42_1BL_TGACv1_030654_AA0097000,TRIAE_CS42_1DL_TGACv1_061125_AA0186220
GO:0009107	lipoate biosynthetic process	biological_process	0.00044242	0.0060941	3	1928	7	74606	TRIAE_CS42_1AL_TGACv1_000132_AA0004290,TRIAE_CS42_1DL_TGACv1_061125_AA0186220,TRIAE_CS42_1BL_TGACv1_030654_AA0097000
GO:0016979	lipoate-protein ligase activity	molecular_function	0.00044242	0.0060941	3	1928	7	74606	TRIAE_CS42_1AL_TGACv1_000132_AA0004290,TRIAE_CS42_1BL_TGACv1_030654_AA0097000,TRIAE_CS42_1DL_TGACv1_061125_AA0186220
GO:0016992	lipoate synthase activity	molecular_function	0.00044242	0.0060941	3	1928	7	74606	TRIAE_CS42_1AL_TGACv1_000132_AA0004290,TRIAE_CS42_1BL_TGACv1_030654_AA0097000,TRIAE_CS42_1DL_TGACv1_061125_AA0186220
GO:0044106	cellular amine metabolic process	biological_process	0.00045301	0.0062273	15	1928	226	74606	TRIAE_CS42_1BL_TGACv1_032207_AA0126810,TRIAE_CS42_3B_TGACv1_221027_AA0727340,TRIAE_CS42_2BS_TGACv1_147224_AA0480120,TRIAE_CS42_2DS_TGACv1_178228_AA0593010,TRIAE_CS42_1AL_TGACv1_000734_AA0018090,TRIAE_CS42_5AL_TGACv1_375039_AA1214530,TRIAE_CS42_7BL_TGACv1_577759_AA1882740,TRIAE_CS42_3DL_TGACv1_254806_AA0896680,TRIAE_CS42_5AL_TGACv1_375327_AA1219960,TRIAE_CS42_4AL_TGACv1_288915_AA0961290,TRIAE_CS42…
GO:0043648	dicarboxylic acid metabolic process	biological_process	0.00048229	0.0066162	11	1928	133	74606	TRIAE_CS42_3B_TGACv1_220588_AA0709800,TRIAE_CS42_3DS_TGACv1_272233_AA0917470,TRIAE_CS42_3AS_TGACv1_211026_AA0683390,TRIAE_CS42_1AL_TGACv1_002631_AA0043990,TRIAE_CS42_1BL_TGACv1_031464_AA0114600,TRIAE_CS42_U_TGACv1_654540_AA2150720,TRIAE_CS42_1BL_TGACv1_030950_AA0104200,TRIAE_CS42_3AL_TGACv1_193640_AA0616020,TRIAE_CS42_3B_TGACv1_222610_AA0767770,TRIAE_CS42_1DL_TGACv1_061661_AA0201230,TRIAE_CS42_1A…
GO:0000719	photoreactive repair	biological_process	0.00050121	0.0068479	2	1928	2	74606	TRIAE_CS42_7DS_TGACv1_622043_AA2031500,TRIAE_CS42_7BS_TGACv1_592026_AA1928570
GO:0003904	deoxyribodipyrimidine photo-lyase activity	molecular_function	0.00050121	0.0068479	2	1928	2	74606	TRIAE_CS42_7BS_TGACv1_592026_AA1928570,TRIAE_CS42_7DS_TGACv1_622043_AA2031500
GO:0009756	carbohydrate mediated signaling	biological_process	0.00052535	0.0071485	3	1928	9	74606	TRIAE_CS42_1AL_TGACv1_001119_AA0025400,TRIAE_CS42_1BL_TGACv1_031944_AA0123110,TRIAE_CS42_1DL_TGACv1_061317_AA0192320
GO:0010182	sugar mediated signaling pathway	biological_process	0.00052535	0.0071485	3	1928	9	74606	TRIAE_CS42_1DL_TGACv1_061317_AA0192320,TRIAE_CS42_1BL_TGACv1_031944_AA0123110,TRIAE_CS42_1AL_TGACv1_001119_AA0025400
GO:0080037	negative regulation of cytokinin-activated signaling pathway	biological_process	0.00053521	0.007268	3	1928	6	74606	TRIAE_CS42_7BS_TGACv1_591976_AA1927160,TRIAE_CS42_U_TGACv1_640854_AA2077410,TRIAE_CS42_7DS_TGACv1_623153_AA2050180
GO:0007015	actin filament organization	biological_process	0.00056248	0.007623	11	1928	127	74606	TRIAE_CS42_5BL_TGACv1_406522_AA1346490,TRIAE_CS42_1BS_TGACv1_049965_AA0164830,TRIAE_CS42_5DS_TGACv1_457254_AA1484340,TRIAE_CS42_4BS_TGACv1_329163_AA1098380,TRIAE_CS42_5DL_TGACv1_433016_AA1398230,TRIAE_CS42_3AL_TGACv1_194824_AA0640140,TRIAE_CS42_3DS_TGACv1_271667_AA0905120,TRIAE_CS42_4DL_TGACv1_342367_AA1111630,TRIAE_CS42_1BS_TGACv1_051077_AA0177630,TRIAE_CS42_4AS_TGACv1_307317_AA1019370,TRIAE_CS4…
GO:0045017	glycerolipid biosynthetic process	biological_process	0.00056784	0.0076802	12	1928	170	74606	TRIAE_CS42_2DS_TGACv1_179608_AA0608200,TRIAE_CS42_3B_TGACv1_221027_AA0727340,TRIAE_CS42_1BL_TGACv1_032207_AA0126810,TRIAE_CS42_3B_TGACv1_220873_AA0722080,TRIAE_CS42_3DL_TGACv1_254806_AA0896680,TRIAE_CS42_1DL_TGACv1_063094_AA0223830,TRIAE_CS42_5BL_TGACv1_404443_AA1299940,TRIAE_CS42_1DL_TGACv1_062419_AA0214280,TRIAE_CS42_3AL_TGACv1_196405_AA0660080,TRIAE_CS42_2BS_TGACv1_146926_AA0475500,TRIAE_CS42_…
GO:0009218	pyrimidine ribonucleotide metabolic process	biological_process	0.00057651	0.0077351	6	1928	42	74606	TRIAE_CS42_3DL_TGACv1_249279_AA0843940,TRIAE_CS42_3B_TGACv1_223258_AA0779170,TRIAE_CS42_3AL_TGACv1_194109_AA0626660,TRIAE_CS42_1DL_TGACv1_061176_AA0187850,TRIAE_CS42_1AL_TGACv1_000492_AA0013410,TRIAE_CS42_1BL_TGACv1_030377_AA0088540
GO:0009220	pyrimidine ribonucleotide biosynthetic process	biological_process	0.00057651	0.0077351	6	1928	42	74606	TRIAE_CS42_3DL_TGACv1_249279_AA0843940,TRIAE_CS42_1DL_TGACv1_061176_AA0187850,TRIAE_CS42_3AL_TGACv1_194109_AA0626660,TRIAE_CS42_3B_TGACv1_223258_AA0779170,TRIAE_CS42_1AL_TGACv1_000492_AA0013410,TRIAE_CS42_1BL_TGACv1_030377_AA0088540
GO:0046132	pyrimidine ribonucleoside biosynthetic process	biological_process	0.00057651	0.0077351	6	1928	42	74606	TRIAE_CS42_3B_TGACv1_223258_AA0779170,TRIAE_CS42_1DL_TGACv1_061176_AA0187850,TRIAE_CS42_3AL_TGACv1_194109_AA0626660,TRIAE_CS42_1AL_TGACv1_000492_AA0013410,TRIAE_CS42_1BL_TGACv1_030377_AA0088540,TRIAE_CS42_3DL_TGACv1_249279_AA0843940
GO:0046134	pyrimidine nucleoside biosynthetic process	biological_process	0.00057651	0.0077351	6	1928	42	74606	TRIAE_CS42_3DL_TGACv1_249279_AA0843940,TRIAE_CS42_1BL_TGACv1_030377_AA0088540,TRIAE_CS42_1AL_TGACv1_000492_AA0013410,TRIAE_CS42_3AL_TGACv1_194109_AA0626660,TRIAE_CS42_1DL_TGACv1_061176_AA0187850,TRIAE_CS42_3B_TGACv1_223258_AA0779170
GO:0015979	photosynthesis	biological_process	0.00057781	0.0077371	29	1928	437	74606	TRIAE_CS42_U_TGACv1_643126_AA2127630,TRIAE_CS42_5BL_TGACv1_404454_AA1300370,TRIAE_CS42_3B_TGACv1_224606_AA0798680,TRIAE_CS42_6BS_TGACv1_514208_AA1656950,TRIAE_CS42_3DL_TGACv1_251681_AA0883770,TRIAE_CS42_1BL_TGACv1_033509_AA0140020,TRIAE_CS42_1BL_TGACv1_030603_AA0095440,TRIAE_CS42_3AS_TGACv1_211390_AA0689620,TRIAE_CS42_3AL_TGACv1_194074_AA0625970,TRIAE_CS42_1DL_TGACv1_061593_AA0199390,TRIAE_CS42_6…
GO:0044769	ATPase activity, coupled to transmembrane movement of ions, rotational mechanism	molecular_function	0.00059668	0.007974	8	1928	59	74606	TRIAE_CS42_3DL_TGACv1_250717_AA0872310,TRIAE_CS42_3B_TGACv1_221643_AA0746430,TRIAE_CS42_7AL_TGACv1_559344_AA1799200,TRIAE_CS42_1BL_TGACv1_031692_AA0118950,TRIAE_CS42_1AL_TGACv1_004040_AA0052320,TRIAE_CS42_7BL_TGACv1_579063_AA1903600,TRIAE_CS42_1DL_TGACv1_062210_AA0210500,TRIAE_CS42_3AL_TGACv1_195562_AA0651220
GO:0005739	mitochondrion	cellular_component	0.00060747	0.008102	53	1928	1165	74606	TRIAE_CS42_3DL_TGACv1_251108_AA0877530,TRIAE_CS42_6DS_TGACv1_544326_AA1747750,TRIAE_CS42_7BL_TGACv1_577299_AA1871560,TRIAE_CS42_5AL_TGACv1_378731_AA1254390,TRIAE_CS42_3DS_TGACv1_272104_AA0914870,TRIAE_CS42_4BS_TGACv1_328196_AA1084480,TRIAE_CS42_2DS_TGACv1_177192_AA0568380,TRIAE_CS42_2DL_TGACv1_161030_AA0556120,TRIAE_CS42_5AL_TGACv1_376570_AA1238560,TRIAE_CS42_4AL_TGACv1_292578_AA0999200,TRIAE_CS4…
GO:0033180	proton-transporting V-type ATPase, V1 domain	cellular_component	0.00061819	0.0082268	5	1928	28	74606	TRIAE_CS42_3B_TGACv1_221643_AA0746430,TRIAE_CS42_3DL_TGACv1_250717_AA0872310,TRIAE_CS42_7BL_TGACv1_579063_AA1903600,TRIAE_CS42_3AL_TGACv1_195562_AA0651220,TRIAE_CS42_6BS_TGACv1_514088_AA1654890
GO:0006000	fructose metabolic process	biological_process	0.00061928	0.0082268	3	1928	9	74606	TRIAE_CS42_4DL_TGACv1_343659_AA1137850,TRIAE_CS42_4AS_TGACv1_306645_AA1011430,TRIAE_CS42_4BL_TGACv1_320480_AA1040880
GO:0032259	methylation	biological_process	0.00062391	0.008272	42	1928	1005	74606	TRIAE_CS42_3DL_TGACv1_254806_AA0896680,TRIAE_CS42_3AL_TGACv1_196405_AA0660080,TRIAE_CS42_5AS_TGACv1_393543_AA1273700,TRIAE_CS42_5BS_TGACv1_423584_AA1379990,TRIAE_CS42_1AL_TGACv1_000465_AA0012660,TRIAE_CS42_4BL_TGACv1_320400_AA1037850,TRIAE_CS42_3B_TGACv1_221027_AA0727340,TRIAE_CS42_1AL_TGACv1_000465_AA0012720,TRIAE_CS42_5AL_TGACv1_374351_AA1197740,TRIAE_CS42_4DS_TGACv1_361983_AA1175310,TRIAE_CS42…
GO:0042800	histone methyltransferase activity (H3-K4 specific)	molecular_function	0.00062577	0.0082803	2	1928	3	74606	TRIAE_CS42_5AS_TGACv1_393543_AA1273700,TRIAE_CS42_5BS_TGACv1_423279_AA1373080
GO:0098656	anion transmembrane transport	biological_process	0.00062816	0.0082957	14	1928	227	74606	TRIAE_CS42_5DL_TGACv1_432946_AA1395680,TRIAE_CS42_4DL_TGACv1_345350_AA1152790,TRIAE_CS42_4AS_TGACv1_306580_AA1010510,TRIAE_CS42_4DL_TGACv1_342488_AA1114970,TRIAE_CS42_3B_TGACv1_223199_AA0777850,TRIAE_CS42_5BL_TGACv1_405907_AA1337450,TRIAE_CS42_3B_TGACv1_222757_AA0770040,TRIAE_CS42_3DS_TGACv1_272832_AA0925630,TRIAE_CS42_5AL_TGACv1_374188_AA1192880,TRIAE_CS42_3DL_TGACv1_252453_AA0890080,TRIAE_CS42_…
GO:0019867	outer membrane	cellular_component	0.0006334	0.0083484	11	1928	122	74606	TRIAE_CS42_5AL_TGACv1_378731_AA1254390,TRIAE_CS42_4BL_TGACv1_321851_AA1066240,TRIAE_CS42_3DL_TGACv1_252453_AA0890080,TRIAE_CS42_3B_TGACv1_222044_AA0755670,TRIAE_CS42_4DL_TGACv1_343137_AA1130350,TRIAE_CS42_3AL_TGACv1_194730_AA0638300,TRIAE_CS42_4DL_TGACv1_345350_AA1152790,TRIAE_CS42_4BL_TGACv1_321242_AA1057770,TRIAE_CS42_3B_TGACv1_222757_AA0770040,TRIAE_CS42_3B_TGACv1_223093_AA0776380,TRIAE_CS42_3…
GO:0009579	thylakoid	cellular_component	0.00063657	0.0083738	42	1928	761	74606	TRIAE_CS42_1DL_TGACv1_061593_AA0199390,TRIAE_CS42_6AS_TGACv1_485824_AA1552850,TRIAE_CS42_6AS_TGACv1_485824_AA1552860,TRIAE_CS42_6BS_TGACv1_514208_AA1656990,TRIAE_CS42_6DS_TGACv1_543042_AA1734510,TRIAE_CS42_3DL_TGACv1_251681_AA0883770,TRIAE_CS42_4DL_TGACv1_342971_AA1126430,TRIAE_CS42_2DL_TGACv1_159084_AA0532060,TRIAE_CS42_7DS_TGACv1_625332_AA2064910,TRIAE_CS42_2DL_TGACv1_160210_AA0548190,TRIAE_CS4…
GO:0008830	dTDP-4-dehydrorhamnose 3,5-epimerase activity	molecular_function	0.00064586	0.0083974	2	1928	2	74606	TRIAE_CS42_6AL_TGACv1_473897_AA1533380,TRIAE_CS42_6DL_TGACv1_528145_AA1711960
GO:0008831	dTDP-4-dehydrorhamnose reductase activity	molecular_function	0.00064586	0.0083974	2	1928	2	74606	TRIAE_CS42_6DL_TGACv1_528145_AA1711960,TRIAE_CS42_6AL_TGACv1_473897_AA1533380
GO:0010253	UDP-rhamnose biosynthetic process	biological_process	0.00064586	0.0083974	2	1928	2	74606	TRIAE_CS42_6DL_TGACv1_528145_AA1711960,TRIAE_CS42_6AL_TGACv1_473897_AA1533380
GO:0019305	dTDP-rhamnose biosynthetic process	biological_process	0.00064586	0.0083974	2	1928	2	74606	TRIAE_CS42_6DL_TGACv1_528145_AA1711960,TRIAE_CS42_6AL_TGACv1_473897_AA1533380
GO:0033478	UDP-rhamnose metabolic process	biological_process	0.00064586	0.0083974	2	1928	2	74606	TRIAE_CS42_6AL_TGACv1_473897_AA1533380,TRIAE_CS42_6DL_TGACv1_528145_AA1711960
GO:0046383	dTDP-rhamnose metabolic process	biological_process	0.00064586	0.0083974	2	1928	2	74606	TRIAE_CS42_6AL_TGACv1_473897_AA1533380,TRIAE_CS42_6DL_TGACv1_528145_AA1711960
GO:0022891	substrate-specific transmembrane transporter activity	molecular_function	0.00066358	0.0086112	47	1928	1222	74606	TRIAE_CS42_U_TGACv1_641184_AA2087580,TRIAE_CS42_6BS_TGACv1_514140_AA1655890,TRIAE_CS42_2AL_TGACv1_093051_AA0270470,TRIAE_CS42_2AL_TGACv1_098072_AA0325680,TRIAE_CS42_5AL_TGACv1_374188_AA1192880,TRIAE_CS42_3DL_TGACv1_249213_AA0841560,TRIAE_CS42_6DS_TGACv1_542697_AA1728230,TRIAE_CS42_2BL_TGACv1_129973_AA0400750,TRIAE_CS42_3B_TGACv1_223199_AA0777850,TRIAE_CS42_3B_TGACv1_222757_AA0770040,TRIAE_CS42_5D…
GO:0006650	glycerophospholipid metabolic process	biological_process	0.00066831	0.0086558	16	1928	298	74606	TRIAE_CS42_1AL_TGACv1_000734_AA0018090,TRIAE_CS42_2BS_TGACv1_146926_AA0475500,TRIAE_CS42_1DL_TGACv1_062419_AA0214280,TRIAE_CS42_3B_TGACv1_222617_AA0767980,TRIAE_CS42_1DL_TGACv1_063094_AA0223830,TRIAE_CS42_U_TGACv1_641722_AA2102520,TRIAE_CS42_4BS_TGACv1_328490_AA1088680,TRIAE_CS42_1BL_TGACv1_032207_AA0126810,TRIAE_CS42_2DS_TGACv1_179608_AA0608200,TRIAE_CS42_U_TGACv1_643011_AA2126070,TRIAE_CS42_2BS…
GO:0072350	tricarboxylic acid metabolic process	biological_process	0.00067186	0.0086851	11	1928	139	74606	TRIAE_CS42_1BL_TGACv1_031464_AA0114600,TRIAE_CS42_7BL_TGACv1_578344_AA1893330,TRIAE_CS42_1AL_TGACv1_002631_AA0043990,TRIAE_CS42_2BS_TGACv1_147224_AA0480120,TRIAE_CS42_2DS_TGACv1_178228_AA0593010,TRIAE_CS42_2BL_TGACv1_129772_AA0395390,TRIAE_CS42_1DL_TGACv1_061661_AA0201230,TRIAE_CS42_2DL_TGACv1_159084_AA0532060,TRIAE_CS42_1AL_TGACv1_000087_AA0002830,TRIAE_CS42_1BL_TGACv1_030950_AA0104200,TRIAE_CS4…
GO:0051015	actin filament binding	molecular_function	0.00068695	0.0088632	6	1928	58	74606	TRIAE_CS42_5DS_TGACv1_457254_AA1484340,TRIAE_CS42_4BS_TGACv1_329163_AA1098380,TRIAE_CS42_1BS_TGACv1_051077_AA0177630,TRIAE_CS42_3AL_TGACv1_194824_AA0640140,TRIAE_CS42_4AS_TGACv1_307317_AA1019370,TRIAE_CS42_4DL_TGACv1_342367_AA1111630
GO:0006694	steroid biosynthetic process	biological_process	0.00069657	0.0089701	8	1928	77	74606	TRIAE_CS42_3AL_TGACv1_194203_AA0628440,TRIAE_CS42_3B_TGACv1_222513_AA0766220,TRIAE_CS42_7DS_TGACv1_623117_AA2049760,TRIAE_CS42_4BL_TGACv1_320400_AA1037850,TRIAE_CS42_4DL_TGACv1_343724_AA1138650,TRIAE_CS42_5AL_TGACv1_378173_AA1251720,TRIAE_CS42_7BS_TGACv1_591893_AA1924780,TRIAE_CS42_4AS_TGACv1_308060_AA1025550
GO:0000015	phosphopyruvate hydratase complex	cellular_component	0.00073387	0.0094143	4	1928	17	74606	TRIAE_CS42_5DS_TGACv1_457334_AA1485300,TRIAE_CS42_5DL_TGACv1_433836_AA1423410,TRIAE_CS42_5AS_TGACv1_394202_AA1278730,TRIAE_CS42_5BS_TGACv1_423965_AA1385430
GO:0004634	phosphopyruvate hydratase activity	molecular_function	0.00073387	0.0094143	4	1928	17	74606	TRIAE_CS42_5BS_TGACv1_423965_AA1385430,TRIAE_CS42_5DS_TGACv1_457334_AA1485300,TRIAE_CS42_5DL_TGACv1_433836_AA1423410,TRIAE_CS42_5AS_TGACv1_394202_AA1278730
GO:0015991	ATP hydrolysis coupled proton transport	biological_process	0.00074049	0.009463	8	1928	68	74606	TRIAE_CS42_3DL_TGACv1_250717_AA0872310,TRIAE_CS42_3B_TGACv1_221643_AA0746430,TRIAE_CS42_7AL_TGACv1_559344_AA1799200,TRIAE_CS42_5DL_TGACv1_436184_AA1459030,TRIAE_CS42_6BS_TGACv1_514088_AA1654890,TRIAE_CS42_U_TGACv1_642696_AA2121820,TRIAE_CS42_7BL_TGACv1_579063_AA1903600,TRIAE_CS42_3AL_TGACv1_195562_AA0651220
GO:0090662	ATP hydrolysis coupled transmembrane transport	biological_process	0.00074049	0.009463	8	1928	68	74606	TRIAE_CS42_5DL_TGACv1_436184_AA1459030,TRIAE_CS42_3B_TGACv1_221643_AA0746430,TRIAE_CS42_7AL_TGACv1_559344_AA1799200,TRIAE_CS42_3DL_TGACv1_250717_AA0872310,TRIAE_CS42_6BS_TGACv1_514088_AA1654890,TRIAE_CS42_7BL_TGACv1_579063_AA1903600,TRIAE_CS42_U_TGACv1_642696_AA2121820,TRIAE_CS42_3AL_TGACv1_195562_AA0651220
GO:0016469	proton-transporting two-sector ATPase complex	cellular_component	0.00074589	0.0095139	12	1928	127	74606	TRIAE_CS42_7BL_TGACv1_579063_AA1903600,TRIAE_CS42_U_TGACv1_642696_AA2121820,TRIAE_CS42_3AL_TGACv1_195562_AA0651220,TRIAE_CS42_2DL_TGACv1_158421_AA0518370,TRIAE_CS42_1DL_TGACv1_062210_AA0210500,TRIAE_CS42_5DL_TGACv1_436184_AA1459030,TRIAE_CS42_3B_TGACv1_221643_AA0746430,TRIAE_CS42_3DL_TGACv1_250717_AA0872310,TRIAE_CS42_7AL_TGACv1_559344_AA1799200,TRIAE_CS42_6BS_TGACv1_514088_AA1654890,TRIAE_CS42_1…
GO:0006099	tricarboxylic acid cycle	biological_process	0.00074785	0.0095209	9	1928	105	74606	TRIAE_CS42_1BL_TGACv1_030950_AA0104200,TRIAE_CS42_2AL_TGACv1_094054_AA0291710,TRIAE_CS42_1DL_TGACv1_061661_AA0201230,TRIAE_CS42_2DL_TGACv1_159084_AA0532060,TRIAE_CS42_1AL_TGACv1_000087_AA0002830,TRIAE_CS42_2BL_TGACv1_129772_AA0395390,TRIAE_CS42_1BL_TGACv1_031464_AA0114600,TRIAE_CS42_7BL_TGACv1_578344_AA1893330,TRIAE_CS42_1AL_TGACv1_002631_AA0043990
GO:0044436	thylakoid part	cellular_component	0.00076415	0.00971	37	1928	637	74606	TRIAE_CS42_7BS_TGACv1_592029_AA1928680,TRIAE_CS42_6AS_TGACv1_485824_AA1552840,TRIAE_CS42_1DL_TGACv1_061593_AA0199400,TRIAE_CS42_6AS_TGACv1_486605_AA1563110,TRIAE_CS42_7DS_TGACv1_625332_AA2064910,TRIAE_CS42_2DL_TGACv1_160210_AA0548190,TRIAE_CS42_2DL_TGACv1_158421_AA0518370,TRIAE_CS42_3B_TGACv1_227262_AA0822510,TRIAE_CS42_4DL_TGACv1_342971_AA1126430,TRIAE_CS42_3DL_TGACv1_251681_AA0883770,TRIAE_CS42…
GO:0009147	pyrimidine nucleoside triphosphate metabolic process	biological_process	0.00076645	0.0097209	6	1928	42	74606	TRIAE_CS42_1AL_TGACv1_000492_AA0013410,TRIAE_CS42_1BL_TGACv1_030377_AA0088540,TRIAE_CS42_1DL_TGACv1_061176_AA0187850,TRIAE_CS42_3AL_TGACv1_194109_AA0626660,TRIAE_CS42_3B_TGACv1_223258_AA0779170,TRIAE_CS42_3DL_TGACv1_249279_AA0843940
GO:0005198	structural molecule activity	molecular_function	0.00077119	0.0097625	59	1928	1103	74606	TRIAE_CS42_7BL_TGACv1_577301_AA1871640,TRIAE_CS42_6DL_TGACv1_526666_AA1689370,TRIAE_CS42_3DL_TGACv1_250228_AA0864600,TRIAE_CS42_2AL_TGACv1_097675_AA0324860,TRIAE_CS42_6BS_TGACv1_513186_AA1633440,TRIAE_CS42_7DS_TGACv1_622243_AA2036170,TRIAE_CS42_2BL_TGACv1_129333_AA0379170,TRIAE_CS42_3B_TGACv1_221721_AA0748350,TRIAE_CS42_6DS_TGACv1_542583_AA1724790,TRIAE_CS42_2AL_TGACv1_095680_AA0313680,TRIAE_CS42…
GO:0004617	phosphoglycerate dehydrogenase activity	molecular_function	0.00077322	0.0097699	3	1928	9	74606	TRIAE_CS42_2DL_TGACv1_160628_AA0552420,TRIAE_CS42_7BL_TGACv1_580117_AA1912080,TRIAE_CS42_2BL_TGACv1_130544_AA0413270
GO:0004450	isocitrate dehydrogenase (NADP+) activity	molecular_function	0.00078311	0.0098763	3	1928	9	74606	TRIAE_CS42_2DL_TGACv1_159084_AA0532060,TRIAE_CS42_2BL_TGACv1_129772_AA0395390,TRIAE_CS42_2AL_TGACv1_094054_AA0291710
GO:0030276	clathrin binding	molecular_function	0.00079411	0.0099963	6	1928	54	74606	TRIAE_CS42_4BS_TGACv1_328452_AA1088030,TRIAE_CS42_4AL_TGACv1_288747_AA0957130,TRIAE_CS42_3DL_TGACv1_250339_AA0866430,TRIAE_CS42_3AL_TGACv1_194328_AA0631110,TRIAE_CS42_3B_TGACv1_220835_AA0720860,TRIAE_CS42_4DS_TGACv1_362497_AA1180110
GO:0015988	energy coupled proton transmembrane transport, against electrochemical gradient	biological_process	0.00080776	0.010149	8	1928	69	74606	TRIAE_CS42_6BS_TGACv1_514088_AA1654890,TRIAE_CS42_5DL_TGACv1_436184_AA1459030,TRIAE_CS42_3B_TGACv1_221643_AA0746430,TRIAE_CS42_7AL_TGACv1_559344_AA1799200,TRIAE_CS42_3DL_TGACv1_250717_AA0872310,TRIAE_CS42_3AL_TGACv1_195562_AA0651220,TRIAE_CS42_7BL_TGACv1_579063_AA1903600,TRIAE_CS42_U_TGACv1_642696_AA2121820
GO:0006101	citrate metabolic process	biological_process	0.00087219	0.010938	9	1928	108	74606	TRIAE_CS42_2BL_TGACv1_129772_AA0395390,TRIAE_CS42_1BL_TGACv1_031464_AA0114600,TRIAE_CS42_7BL_TGACv1_578344_AA1893330,TRIAE_CS42_1AL_TGACv1_002631_AA0043990,TRIAE_CS42_2AL_TGACv1_094054_AA0291710,TRIAE_CS42_1BL_TGACv1_030950_AA0104200,TRIAE_CS42_2DL_TGACv1_159084_AA0532060,TRIAE_CS42_1AL_TGACv1_000087_AA0002830,TRIAE_CS42_1DL_TGACv1_061661_AA0201230
GO:0046486	glycerolipid metabolic process	biological_process	0.00089434	0.011195	18	1928	360	74606	TRIAE_CS42_2BS_TGACv1_146181_AA0457580,TRIAE_CS42_U_TGACv1_643011_AA2126070,TRIAE_CS42_3DL_TGACv1_254806_AA0896680,TRIAE_CS42_4AL_TGACv1_288528_AA0951160,TRIAE_CS42_5BL_TGACv1_404443_AA1299940,TRIAE_CS42_3AL_TGACv1_196405_AA0660080,TRIAE_CS42_2DS_TGACv1_177763_AA0584180,TRIAE_CS42_3B_TGACv1_221027_AA0727340,TRIAE_CS42_1AL_TGACv1_000734_AA0018090,TRIAE_CS42_3B_TGACv1_220873_AA0722080,TRIAE_CS42_2B…
GO:0071806	protein transmembrane transport	biological_process	0.00090688	0.011331	9	1928	88	74606	TRIAE_CS42_6BS_TGACv1_514140_AA1655890,TRIAE_CS42_4DL_TGACv1_343137_AA1130350,TRIAE_CS42_3AL_TGACv1_194730_AA0638300,TRIAE_CS42_2DL_TGACv1_160210_AA0548190,TRIAE_CS42_3B_TGACv1_223093_AA0776380,TRIAE_CS42_4BL_TGACv1_321242_AA1057770,TRIAE_CS42_6AS_TGACv1_486953_AA1566790,TRIAE_CS42_6DS_TGACv1_542697_AA1728230,TRIAE_CS42_3B_TGACv1_223525_AA0783520
GO:0046653	tetrahydrofolate metabolic process	biological_process	0.00097301	0.012135	5	1928	29	74606	TRIAE_CS42_2DL_TGACv1_159916_AA0544360,TRIAE_CS42_5AL_TGACv1_374680_AA1206310,TRIAE_CS42_2AL_TGACv1_094077_AA0292210,TRIAE_CS42_5BL_TGACv1_406345_AA1344380,TRIAE_CS42_2BL_TGACv1_129567_AA0388870
GO:0033176	proton-transporting V-type ATPase complex	cellular_component	0.00097938	0.012192	7	1928	57	74606	TRIAE_CS42_3AL_TGACv1_195562_AA0651220,TRIAE_CS42_6BS_TGACv1_514088_AA1654890,TRIAE_CS42_5DL_TGACv1_436184_AA1459030,TRIAE_CS42_7BL_TGACv1_579063_AA1903600,TRIAE_CS42_3B_TGACv1_221643_AA0746430,TRIAE_CS42_3DL_TGACv1_250717_AA0872310,TRIAE_CS42_U_TGACv1_642696_AA2121820
GO:0010232	vascular transport	biological_process	0.0010546	0.013079	3	1928	10	74606	TRIAE_CS42_7BL_TGACv1_577849_AA1884560,TRIAE_CS42_7AL_TGACv1_559693_AA1800520,TRIAE_CS42_7DL_TGACv1_604116_AA1994020
GO:0010233	phloem transport	biological_process	0.0010546	0.013079	3	1928	10	74606	TRIAE_CS42_7DL_TGACv1_604116_AA1994020,TRIAE_CS42_7AL_TGACv1_559693_AA1800520,TRIAE_CS42_7BL_TGACv1_577849_AA1884560
GO:0005253	anion channel activity	molecular_function	0.0010622	0.013125	6	1928	53	74606	TRIAE_CS42_3DS_TGACv1_272832_AA0925630,TRIAE_CS42_3B_TGACv1_222757_AA0770040,TRIAE_CS42_4DL_TGACv1_345350_AA1152790,TRIAE_CS42_4BL_TGACv1_321851_AA1066240,TRIAE_CS42_3DL_TGACv1_252453_AA0890080,TRIAE_CS42_5AL_TGACv1_378731_AA1254390
GO:0008308	voltage-gated anion channel activity	molecular_function	0.0010622	0.013125	6	1928	53	74606	TRIAE_CS42_4BL_TGACv1_321851_AA1066240,TRIAE_CS42_3DL_TGACv1_252453_AA0890080,TRIAE_CS42_4DL_TGACv1_345350_AA1152790,TRIAE_CS42_5AL_TGACv1_378731_AA1254390,TRIAE_CS42_3DS_TGACv1_272832_AA0925630,TRIAE_CS42_3B_TGACv1_222757_AA0770040
GO:0015605	organophosphate ester transmembrane transporter activity	molecular_function	0.0010705	0.013204	6	1928	49	74606	TRIAE_CS42_2BL_TGACv1_129391_AA0381430,TRIAE_CS42_5AL_TGACv1_374188_AA1192880,TRIAE_CS42_5DL_TGACv1_432946_AA1395680,TRIAE_CS42_3AS_TGACv1_212675_AA0702590,TRIAE_CS42_3B_TGACv1_223199_AA0777850,TRIAE_CS42_5BL_TGACv1_405907_AA1337450
GO:0016776	phosphotransferase activity, phosphate group as acceptor	molecular_function	0.0010805	0.013302	8	1928	78	74606	TRIAE_CS42_U_TGACv1_642445_AA2117740,TRIAE_CS42_5BS_TGACv1_424804_AA1391850,TRIAE_CS42_1DL_TGACv1_061176_AA0187850,TRIAE_CS42_1BL_TGACv1_030377_AA0088540,TRIAE_CS42_2BS_TGACv1_146900_AA0475120,TRIAE_CS42_1AL_TGACv1_000492_AA0013410,TRIAE_CS42_6BL_TGACv1_499743_AA1590800,TRIAE_CS42_4DS_TGACv1_361106_AA1161070
GO:0019320	hexose catabolic process	biological_process	0.0010919	0.013418	3	1928	9	74606	TRIAE_CS42_3B_TGACv1_222141_AA0758150,TRIAE_CS42_3AL_TGACv1_196039_AA0656760,TRIAE_CS42_3DL_TGACv1_251020_AA0876220
GO:0030837	negative regulation of actin filament polymerization	biological_process	0.0011711	0.014287	3	1928	9	74606	TRIAE_CS42_4BS_TGACv1_329163_AA1098380,TRIAE_CS42_4AS_TGACv1_307317_AA1019370,TRIAE_CS42_4DL_TGACv1_342367_AA1111630
GO:0031333	negative regulation of protein complex assembly	biological_process	0.0011711	0.014287	3	1928	9	74606	TRIAE_CS42_4DL_TGACv1_342367_AA1111630,TRIAE_CS42_4AS_TGACv1_307317_AA1019370,TRIAE_CS42_4BS_TGACv1_329163_AA1098380
GO:0032272	negative regulation of protein polymerization	biological_process	0.0011711	0.014287	3	1928	9	74606	TRIAE_CS42_4AS_TGACv1_307317_AA1019370,TRIAE_CS42_4DL_TGACv1_342367_AA1111630,TRIAE_CS42_4BS_TGACv1_329163_AA1098380
GO:0051693	actin filament capping	biological_process	0.0011711	0.014287	3	1928	9	74606	TRIAE_CS42_4BS_TGACv1_329163_AA1098380,TRIAE_CS42_4AS_TGACv1_307317_AA1019370,TRIAE_CS42_4DL_TGACv1_342367_AA1111630
GO:0006144	purine nucleobase metabolic process	biological_process	0.001201	0.014625	5	1928	32	74606	TRIAE_CS42_2BL_TGACv1_129785_AA0395850,TRIAE_CS42_6BL_TGACv1_499716_AA1589820,TRIAE_CS42_6DL_TGACv1_528171_AA1712170,TRIAE_CS42_3DL_TGACv1_250245_AA0864940,TRIAE_CS42_6AL_TGACv1_472192_AA1519000
GO:0047150	betaine-homocysteine S-methyltransferase activity	molecular_function	0.0012125	0.014738	3	1928	9	74606	TRIAE_CS42_4BL_TGACv1_320349_AA1036310,TRIAE_CS42_4DL_TGACv1_343385_AA1133850,TRIAE_CS42_4AS_TGACv1_307275_AA1019080
GO:0030029	actin filament-based process	biological_process	0.0012178	0.01475	11	1928	145	74606	TRIAE_CS42_3DS_TGACv1_271667_AA0905120,TRIAE_CS42_1BS_TGACv1_051077_AA0177630,TRIAE_CS42_5AL_TGACv1_375015_AA1213980,TRIAE_CS42_4AS_TGACv1_307317_AA1019370,TRIAE_CS42_4DL_TGACv1_342367_AA1111630,TRIAE_CS42_4BS_TGACv1_329163_AA1098380,TRIAE_CS42_5DS_TGACv1_457254_AA1484340,TRIAE_CS42_3AL_TGACv1_194824_AA0640140,TRIAE_CS42_5DL_TGACv1_433016_AA1398230,TRIAE_CS42_1BS_TGACv1_049965_AA0164830,TRIAE_CS4…
GO:0030036	actin cytoskeleton organization	biological_process	0.0012178	0.01475	11	1928	145	74606	TRIAE_CS42_5BL_TGACv1_406522_AA1346490,TRIAE_CS42_1BS_TGACv1_049965_AA0164830,TRIAE_CS42_3AL_TGACv1_194824_AA0640140,TRIAE_CS42_5DL_TGACv1_433016_AA1398230,TRIAE_CS42_5DS_TGACv1_457254_AA1484340,TRIAE_CS42_4BS_TGACv1_329163_AA1098380,TRIAE_CS42_1BS_TGACv1_051077_AA0177630,TRIAE_CS42_4AS_TGACv1_307317_AA1019370,TRIAE_CS42_4DL_TGACv1_342367_AA1111630,TRIAE_CS42_5AL_TGACv1_375015_AA1213980,TRIAE_CS4…
GO:0005388	calcium-transporting ATPase activity	molecular_function	0.0012717	0.015374	4	1928	32	74606	TRIAE_CS42_2AL_TGACv1_093051_AA0270470,TRIAE_CS42_2BL_TGACv1_129973_AA0400750,TRIAE_CS42_4AL_TGACv1_288269_AA0942920,TRIAE_CS42_2DL_TGACv1_159040_AA0531140
GO:0030243	cellulose metabolic process	biological_process	0.0012777	0.01542	11	1928	177	74606	TRIAE_CS42_2AL_TGACv1_093096_AA0271930,TRIAE_CS42_2BL_TGACv1_131489_AA0428400,TRIAE_CS42_5AL_TGACv1_375073_AA1215420,TRIAE_CS42_2BS_TGACv1_147826_AA0487990,TRIAE_CS42_2DS_TGACv1_180213_AA0610440,TRIAE_CS42_5DL_TGACv1_438060_AA1467880,TRIAE_CS42_5BL_TGACv1_404684_AA1308350,TRIAE_CS42_4AL_TGACv1_289959_AA0979560,TRIAE_CS42_4BS_TGACv1_328010_AA1080930,TRIAE_CS42_2DL_TGACv1_161143_AA0557040,TRIAE_CS4…
GO:0000796	condensin complex	cellular_component	0.0013146	0.015836	3	1928	10	74606	TRIAE_CS42_3AL_TGACv1_195859_AA0654910,TRIAE_CS42_2AL_TGACv1_098666_AA0326490,TRIAE_CS42_3B_TGACv1_226023_AA0813450
GO:0051765	inositol tetrakisphosphate kinase activity	molecular_function	0.0013423	0.016091	4	1928	20	74606	TRIAE_CS42_7DL_TGACv1_603779_AA1989110,TRIAE_CS42_5AL_TGACv1_376140_AA1232710,TRIAE_CS42_7AL_TGACv1_556888_AA1772870,TRIAE_CS42_5DL_TGACv1_433402_AA1412060
GO:0051766	inositol trisphosphate kinase activity	molecular_function	0.0013423	0.016091	4	1928	20	74606	TRIAE_CS42_5DL_TGACv1_433402_AA1412060,TRIAE_CS42_7AL_TGACv1_556888_AA1772870,TRIAE_CS42_5AL_TGACv1_376140_AA1232710,TRIAE_CS42_7DL_TGACv1_603779_AA1989110
GO:0016673	oxidoreductase activity, acting on a sulfur group of donors, iron-sulfur protein as acceptor	molecular_function	0.0013453	0.016091	2	1928	3	74606	TRIAE_CS42_1DL_TGACv1_061476_AA0196370,TRIAE_CS42_1AL_TGACv1_001652_AA0033600
GO:0050311	sulfite reductase (ferredoxin) activity	molecular_function	0.0013453	0.016091	2	1928	3	74606	TRIAE_CS42_1DL_TGACv1_061476_AA0196370,TRIAE_CS42_1AL_TGACv1_001652_AA0033600
GO:0004489	methylenetetrahydrofolate reductase (NAD(P)H) activity	molecular_function	0.0014007	0.016724	2	1928	3	74606	TRIAE_CS42_5BL_TGACv1_406345_AA1344380,TRIAE_CS42_5AL_TGACv1_374680_AA1206310
GO:0009918	sterol delta7 reductase activity	molecular_function	0.0014273	0.016985	2	1928	3	74606	TRIAE_CS42_3B_TGACv1_222513_AA0766220,TRIAE_CS42_3AL_TGACv1_194203_AA0628440
GO:0022892	substrate-specific transporter activity	molecular_function	0.0014277	0.016985	50	1928	1377	74606	TRIAE_CS42_5DL_TGACv1_436184_AA1459030,TRIAE_CS42_3AS_TGACv1_212675_AA0702590,TRIAE_CS42_5AL_TGACv1_378731_AA1254390,TRIAE_CS42_4AS_TGACv1_306580_AA1010500,TRIAE_CS42_1BL_TGACv1_031047_AA0106660,TRIAE_CS42_4DL_TGACv1_342488_AA1114970,TRIAE_CS42_1DL_TGACv1_061682_AA0201650,TRIAE_CS42_1DL_TGACv1_062210_AA0210500,TRIAE_CS42_1BL_TGACv1_033737_AA0141740,TRIAE_CS42_2DL_TGACv1_159040_AA0531140,TRIAE_CS4…
GO:0006904	vesicle docking involved in exocytosis	biological_process	0.0014365	0.017061	5	1928	39	74606	TRIAE_CS42_6BL_TGACv1_500073_AA1598240,TRIAE_CS42_6BL_TGACv1_500073_AA1598210,TRIAE_CS42_6AL_TGACv1_471366_AA1507720,TRIAE_CS42_6BL_TGACv1_499660_AA1588490,TRIAE_CS42_6DL_TGACv1_526657_AA1689120
GO:0004372	glycine hydroxymethyltransferase activity	molecular_function	0.0014679	0.017291	3	1928	11	74606	TRIAE_CS42_2DL_TGACv1_159916_AA0544360,TRIAE_CS42_2BL_TGACv1_129567_AA0388870,TRIAE_CS42_2AL_TGACv1_094077_AA0292210
GO:0019264	glycine biosynthetic process from serine	biological_process	0.0014679	0.017291	3	1928	11	74606	TRIAE_CS42_2BL_TGACv1_129567_AA0388870,TRIAE_CS42_2AL_TGACv1_094077_AA0292210,TRIAE_CS42_2DL_TGACv1_159916_AA0544360
GO:0006213	pyrimidine nucleoside metabolic process	biological_process	0.0014684	0.017291	6	1928	50	74606	TRIAE_CS42_1DL_TGACv1_061176_AA0187850,TRIAE_CS42_3AL_TGACv1_194109_AA0626660,TRIAE_CS42_3B_TGACv1_223258_AA0779170,TRIAE_CS42_1BL_TGACv1_030377_AA0088540,TRIAE_CS42_1AL_TGACv1_000492_AA0013410,TRIAE_CS42_3DL_TGACv1_249279_AA0843940
GO:0046131	pyrimidine ribonucleoside metabolic process	biological_process	0.0014684	0.017291	6	1928	50	74606	TRIAE_CS42_3DL_TGACv1_249279_AA0843940,TRIAE_CS42_3B_TGACv1_223258_AA0779170,TRIAE_CS42_1DL_TGACv1_061176_AA0187850,TRIAE_CS42_3AL_TGACv1_194109_AA0626660,TRIAE_CS42_1BL_TGACv1_030377_AA0088540,TRIAE_CS42_1AL_TGACv1_000492_AA0013410
GO:0016774	phosphotransferase activity, carboxyl group as acceptor	molecular_function	0.0014688	0.017291	5	1928	36	74606	TRIAE_CS42_3DL_TGACv1_250063_AA0861520,TRIAE_CS42_3B_TGACv1_225182_AA0805900,TRIAE_CS42_1AL_TGACv1_000254_AA0007380,TRIAE_CS42_5BL_TGACv1_404321_AA1295470,TRIAE_CS42_U_TGACv1_641432_AA2094970
GO:0005886	plasma membrane	cellular_component	0.0014748	0.017331	45	1928	1094	74606	TRIAE_CS42_7BS_TGACv1_591976_AA1927160,TRIAE_CS42_3AL_TGACv1_194203_AA0628440,TRIAE_CS42_6DS_TGACv1_543203_AA1736950,TRIAE_CS42_3DL_TGACv1_250864_AA0874390,TRIAE_CS42_6AL_TGACv1_473897_AA1533380,TRIAE_CS42_7AL_TGACv1_556695_AA1769100,TRIAE_CS42_4AS_TGACv1_306580_AA1010510,TRIAE_CS42_4AL_TGACv1_288747_AA0957130,TRIAE_CS42_U_TGACv1_640699_AA2069290,TRIAE_CS42_5DL_TGACv1_433024_AA1398620,TRIAE_CS42_…
GO:0010295	(+)-abscisic acid 8'-hydroxylase activity	molecular_function	0.0015013	0.017612	2	1928	3	74606	TRIAE_CS42_5BL_TGACv1_404577_AA1304800,TRIAE_CS42_5AL_TGACv1_374310_AA1196560
GO:0006152	purine nucleoside catabolic process	biological_process	0.001517	0.017734	3	1928	10	74606	TRIAE_CS42_2DL_TGACv1_158777_AA0526010,TRIAE_CS42_2AL_TGACv1_094486_AA0298610,TRIAE_CS42_2AL_TGACv1_094077_AA0292200
GO:0046130	purine ribonucleoside catabolic process	biological_process	0.001517	0.017734	3	1928	10	74606	TRIAE_CS42_2DL_TGACv1_158777_AA0526010,TRIAE_CS42_2AL_TGACv1_094486_AA0298610,TRIAE_CS42_2AL_TGACv1_094077_AA0292200
GO:0009793	embryo development ending in seed dormancy	biological_process	0.001581	0.018451	15	1928	257	74606	TRIAE_CS42_3DL_TGACv1_250864_AA0874390,TRIAE_CS42_7DS_TGACv1_621538_AA2018830,TRIAE_CS42_1BL_TGACv1_031944_AA0123110,TRIAE_CS42_3B_TGACv1_221849_AA0751620,TRIAE_CS42_7AS_TGACv1_570244_AA1832810,TRIAE_CS42_5BL_TGACv1_405128_AA1320750,TRIAE_CS42_1BS_TGACv1_049652_AA0158940,TRIAE_CS42_1AL_TGACv1_001119_AA0025400,TRIAE_CS42_2AS_TGACv1_113039_AA0350300,TRIAE_CS42_U_TGACv1_640757_AA2072670,TRIAE_CS42_7…
GO:0031969	chloroplast membrane	cellular_component	0.0016053	0.018701	8	1928	90	74606	TRIAE_CS42_3B_TGACv1_222044_AA0755670,TRIAE_CS42_4DS_TGACv1_361391_AA1166860,TRIAE_CS42_4BS_TGACv1_329699_AA1103360,TRIAE_CS42_4AS_TGACv1_306406_AA1007690,TRIAE_CS42_4BL_TGACv1_321702_AA1064290,TRIAE_CS42_4DL_TGACv1_343812_AA1140000,TRIAE_CS42_4AL_TGACv1_289623_AA0974220,TRIAE_CS42_2DL_TGACv1_160210_AA0548190
GO:0009070	serine family amino acid biosynthetic process	biological_process	0.0016338	0.019	7	1928	72	74606	TRIAE_CS42_2DL_TGACv1_159916_AA0544360,TRIAE_CS42_2BL_TGACv1_129567_AA0388870,TRIAE_CS42_7BL_TGACv1_580117_AA1912080,TRIAE_CS42_2BL_TGACv1_130544_AA0413270,TRIAE_CS42_2AL_TGACv1_094077_AA0292210,TRIAE_CS42_2DS_TGACv1_177565_AA0580190,TRIAE_CS42_2DL_TGACv1_160628_AA0552420
GO:0015980	energy derivation by oxidation of organic compounds	biological_process	0.0016409	0.01905	14	1928	218	74606	TRIAE_CS42_1DL_TGACv1_061661_AA0201230,AIG90477,TRIAE_CS42_2DS_TGACv1_177436_AA0577070,TRIAE_CS42_2DL_TGACv1_159084_AA0532060,TRIAE_CS42_1AL_TGACv1_000087_AA0002830,TRIAE_CS42_1BL_TGACv1_031712_AA0119450,TRIAE_CS42_2AL_TGACv1_094054_AA0291710,TRIAE_CS42_1BL_TGACv1_030950_AA0104200,TRIAE_CS42_7BL_TGACv1_578344_AA1893330,TRIAE_CS42_1BL_TGACv1_031464_AA0114600,TRIAE_CS42_1AL_TGACv1_002631_AA0043990,…
GO:0008238	exopeptidase activity	molecular_function	0.0016771	0.019426	16	1928	298	74606	TRIAE_CS42_6AL_TGACv1_471730_AA1513500,TRIAE_CS42_1DL_TGACv1_062429_AA0214370,TRIAE_CS42_6AS_TGACv1_486130_AA1557260,TRIAE_CS42_4AL_TGACv1_289060_AA0964280,TRIAE_CS42_6BS_TGACv1_513165_AA1632790,TRIAE_CS42_1BL_TGACv1_034229_AA0143900,TRIAE_CS42_1BL_TGACv1_032099_AA0125390,TRIAE_CS42_1DL_TGACv1_061968_AA0206620,TRIAE_CS42_1AL_TGACv1_003876_AA0051820,TRIAE_CS42_7BS_TGACv1_592821_AA1944680,TRIAE_CS4…
GO:0006102	isocitrate metabolic process	biological_process	0.001679	0.019426	3	1928	12	74606	TRIAE_CS42_2AL_TGACv1_094054_AA0291710,TRIAE_CS42_2BL_TGACv1_129772_AA0395390,TRIAE_CS42_2DL_TGACv1_159084_AA0532060
GO:0000823	inositol-1,4,5-trisphosphate 6-kinase activity	molecular_function	0.001691	0.019498	2	1928	3	74606	TRIAE_CS42_7AL_TGACv1_556888_AA1772870,TRIAE_CS42_7DL_TGACv1_603779_AA1989110
GO:0047326	inositol tetrakisphosphate 5-kinase activity	molecular_function	0.001691	0.019498	2	1928	3	74606	TRIAE_CS42_7AL_TGACv1_556888_AA1772870,TRIAE_CS42_7DL_TGACv1_603779_AA1989110
GO:0032266	phosphatidylinositol-3-phosphate binding	molecular_function	0.0017176	0.019736	2	1928	3	74606	TRIAE_CS42_3DL_TGACv1_250864_AA0874390,TRIAE_CS42_3B_TGACv1_221849_AA0751620
GO:1901981	phosphatidylinositol phosphate binding	molecular_function	0.0017176	0.019736	2	1928	3	74606	TRIAE_CS42_3B_TGACv1_221849_AA0751620,TRIAE_CS42_3DL_TGACv1_250864_AA0874390
GO:0004332	fructose-bisphosphate aldolase activity	molecular_function	0.0017694	0.020296	4	1928	21	74606	TRIAE_CS42_3AL_TGACv1_196429_AA0660330,TRIAE_CS42_3DL_TGACv1_250475_AA0868810,TRIAE_CS42_3B_TGACv1_221609_AA0745810,TRIAE_CS42_3DL_TGACv1_251713_AA0884060
GO:0004133	glycogen debranching enzyme activity	molecular_function	0.0018048	0.020667	3	1928	13	74606	TRIAE_CS42_2DS_TGACv1_177436_AA0577070,TRIAE_CS42_2AS_TGACv1_112747_AA0344470,TRIAE_CS42_2BS_TGACv1_148740_AA0494910
GO:1901264	carbohydrate derivative transport	biological_process	0.0018355	0.020984	7	1928	74	74606	TRIAE_CS42_3B_TGACv1_223199_AA0777850,TRIAE_CS42_5BL_TGACv1_405907_AA1337450,TRIAE_CS42_3AS_TGACv1_212675_AA0702590,TRIAE_CS42_2BS_TGACv1_148351_AA0492470,TRIAE_CS42_5DL_TGACv1_432946_AA1395680,TRIAE_CS42_5AL_TGACv1_374188_AA1192880,TRIAE_CS42_2BL_TGACv1_129391_AA0381430
GO:0009790	embryo development	biological_process	0.0018776	0.021428	15	1928	263	74606	TRIAE_CS42_2AS_TGACv1_113039_AA0350300,TRIAE_CS42_U_TGACv1_640757_AA2072670,TRIAE_CS42_7AS_TGACv1_570758_AA1840530,TRIAE_CS42_1DL_TGACv1_061317_AA0192320,TRIAE_CS42_7DS_TGACv1_621997_AA2030830,TRIAE_CS42_4AL_TGACv1_289752_AA0976330,TRIAE_CS42_1BL_TGACv1_031520_AA0115500,TRIAE_CS42_3DL_TGACv1_250864_AA0874390,TRIAE_CS42_7DS_TGACv1_621538_AA2018830,TRIAE_CS42_1BL_TGACv1_031944_AA0123110,TRIAE_CS42_…
GO:0016879	ligase activity, forming carbon-nitrogen bonds	molecular_function	0.0019117	0.02178	11	1928	173	74606	TRIAE_CS42_1DL_TGACv1_063573_AA0228750,TRIAE_CS42_1DL_TGACv1_061125_AA0186220,TRIAE_CS42_3DL_TGACv1_249279_AA0843940,TRIAE_CS42_3B_TGACv1_223258_AA0779170,TRIAE_CS42_1AL_TGACv1_000132_AA0004290,TRIAE_CS42_3AL_TGACv1_194109_AA0626660,TRIAE_CS42_1BL_TGACv1_030654_AA0097000,TRIAE_CS42_4AS_TGACv1_307728_AA1023060,TRIAE_CS42_1AL_TGACv1_000512_AA0013610,TRIAE_CS42_6DL_TGACv1_527226_AA1700820,TRIAE_CS42…
GO:0009060	aerobic respiration	biological_process	0.0019164	0.021797	9	1928	119	74606	TRIAE_CS42_1DL_TGACv1_061661_AA0201230,TRIAE_CS42_2DL_TGACv1_159084_AA0532060,TRIAE_CS42_1AL_TGACv1_000087_AA0002830,TRIAE_CS42_1BL_TGACv1_030950_AA0104200,TRIAE_CS42_2AL_TGACv1_094054_AA0291710,TRIAE_CS42_7BL_TGACv1_578344_AA1893330,TRIAE_CS42_1BL_TGACv1_031464_AA0114600,TRIAE_CS42_1AL_TGACv1_002631_AA0043990,TRIAE_CS42_2BL_TGACv1_129772_AA0395390
GO:0072509	divalent inorganic cation transmembrane transporter activity	molecular_function	0.00203	0.023051	9	1928	127	74606	TRIAE_CS42_2DL_TGACv1_159040_AA0531140,TRIAE_CS42_3DL_TGACv1_249213_AA0841560,TRIAE_CS42_2DL_TGACv1_159221_AA0534770,TRIAE_CS42_3AL_TGACv1_193642_AA0616060,TRIAE_CS42_2AL_TGACv1_098072_AA0325680,TRIAE_CS42_2AL_TGACv1_093051_AA0270470,TRIAE_CS42_U_TGACv1_640699_AA2069290,TRIAE_CS42_2BL_TGACv1_129973_AA0400750,TRIAE_CS42_4AL_TGACv1_288269_AA0942920
GO:0009791	post-embryonic development	biological_process	0.0021071	0.023885	33	1928	811	74606	TRIAE_CS42_U_TGACv1_640757_AA2072670,TRIAE_CS42_2AS_TGACv1_113039_AA0350300,TRIAE_CS42_7DS_TGACv1_621997_AA2030830,TRIAE_CS42_6BL_TGACv1_499837_AA1592870,TRIAE_CS42_4AL_TGACv1_289752_AA0976330,TRIAE_CS42_1DS_TGACv1_082951_AA0265140,TRIAE_CS42_1DL_TGACv1_061584_AA0199150,TRIAE_CS42_1BS_TGACv1_050006_AA0165760,TRIAE_CS42_7DS_TGACv1_621538_AA2018830,TRIAE_CS42_3DL_TGACv1_250864_AA0874390,TRIAE_CS42_…
GO:0009069	serine family amino acid metabolic process	biological_process	0.0021243	0.024008	8	1928	94	74606	TRIAE_CS42_2DL_TGACv1_159916_AA0544360,TRIAE_CS42_7BL_TGACv1_580117_AA1912080,TRIAE_CS42_2BL_TGACv1_129567_AA0388870,TRIAE_CS42_2DS_TGACv1_177565_AA0580190,TRIAE_CS42_2DL_TGACv1_160628_AA0552420,TRIAE_CS42_6AS_TGACv1_485264_AA1542040,TRIAE_CS42_2AL_TGACv1_094077_AA0292210,TRIAE_CS42_2BL_TGACv1_130544_AA0413270
GO:0006290	pyrimidine dimer repair	biological_process	0.0021251	0.024008	2	1928	4	74606	TRIAE_CS42_7DS_TGACv1_622043_AA2031500,TRIAE_CS42_7BS_TGACv1_592026_AA1928570
GO:0070546	L-phenylalanine aminotransferase activity	molecular_function	0.0021433	0.024132	3	1928	12	74606	TRIAE_CS42_7BL_TGACv1_581547_AA1917420,TRIAE_CS42_6DS_TGACv1_543365_AA1739120,TRIAE_CS42_6BS_TGACv1_513449_AA1641870
GO:0080130	L-phenylalanine:2-oxoglutarate aminotransferase activity	molecular_function	0.0021433	0.024132	3	1928	12	74606	TRIAE_CS42_6BS_TGACv1_513449_AA1641870,TRIAE_CS42_6DS_TGACv1_543365_AA1739120,TRIAE_CS42_7BL_TGACv1_581547_AA1917420
GO:0044429	mitochondrial part	cellular_component	0.0021489	0.024156	27	1928	454	74606	TRIAE_CS42_6BL_TGACv1_500075_AA1598290,TRIAE_CS42_4BL_TGACv1_321242_AA1057770,TRIAE_CS42_3B_TGACv1_223093_AA0776380,TRIAE_CS42_6BS_TGACv1_514091_AA1654910,TRIAE_CS42_4DL_TGACv1_345350_AA1152790,TRIAE_CS42_6BL_TGACv1_501539_AA1618480,TRIAE_CS42_4DL_TGACv1_343137_AA1130350,TRIAE_CS42_4BS_TGACv1_329474_AA1101780,TRIAE_CS42_1BL_TGACv1_031692_AA0118950,TRIAE_CS42_3DL_TGACv1_252453_AA0890080,TRIAE_CS42…
GO:0046498	S-adenosylhomocysteine metabolic process	biological_process	0.0021699	0.02435	3	1928	12	74606	TRIAE_CS42_2AL_TGACv1_094077_AA0292200,TRIAE_CS42_2DL_TGACv1_158777_AA0526010,TRIAE_CS42_2AL_TGACv1_094486_AA0298610
GO:0015085	calcium ion transmembrane transporter activity	molecular_function	0.0021891	0.024484	5	1928	51	74606	TRIAE_CS42_2AL_TGACv1_093051_AA0270470,TRIAE_CS42_3DL_TGACv1_249213_AA0841560,TRIAE_CS42_4AL_TGACv1_288269_AA0942920,TRIAE_CS42_2BL_TGACv1_129973_AA0400750,TRIAE_CS42_2DL_TGACv1_159040_AA0531140
GO:0070588	calcium ion transmembrane transport	biological_process	0.0021891	0.024484	5	1928	51	74606	TRIAE_CS42_2DL_TGACv1_159040_AA0531140,TRIAE_CS42_2BL_TGACv1_129973_AA0400750,TRIAE_CS42_4AL_TGACv1_288269_AA0942920,TRIAE_CS42_3DL_TGACv1_249213_AA0841560,TRIAE_CS42_2AL_TGACv1_093051_AA0270470
GO:0009914	hormone transport	biological_process	0.0022054	0.024584	6	1928	57	74606	TRIAE_CS42_7DS_TGACv1_623153_AA2050180,TRIAE_CS42_4DL_TGACv1_342367_AA1111630,TRIAE_CS42_4AS_TGACv1_307317_AA1019370,TRIAE_CS42_U_TGACv1_640854_AA2077410,TRIAE_CS42_4BS_TGACv1_329163_AA1098380,TRIAE_CS42_7BS_TGACv1_591976_AA1927160
GO:0060918	auxin transport	biological_process	0.0022054	0.024584	6	1928	57	74606	TRIAE_CS42_4DL_TGACv1_342367_AA1111630,TRIAE_CS42_4AS_TGACv1_307317_AA1019370,TRIAE_CS42_7DS_TGACv1_623153_AA2050180,TRIAE_CS42_4BS_TGACv1_329163_AA1098380,TRIAE_CS42_U_TGACv1_640854_AA2077410,TRIAE_CS42_7BS_TGACv1_591976_AA1927160
GO:0030834	regulation of actin filament depolymerization	biological_process	0.0022158	0.024619	3	1928	12	74606	TRIAE_CS42_4BS_TGACv1_329163_AA1098380,TRIAE_CS42_4AS_TGACv1_307317_AA1019370,TRIAE_CS42_4DL_TGACv1_342367_AA1111630
GO:0030835	negative regulation of actin filament depolymerization	biological_process	0.0022158	0.024619	3	1928	12	74606	TRIAE_CS42_4AS_TGACv1_307317_AA1019370,TRIAE_CS42_4DL_TGACv1_342367_AA1111630,TRIAE_CS42_4BS_TGACv1_329163_AA1098380
GO:0030151	molybdenum ion binding	molecular_function	0.0023009	0.025523	4	1928	25	74606	TRIAE_CS42_6DS_TGACv1_543770_AA1744010,TRIAE_CS42_7AS_TGACv1_569986_AA1828160,TRIAE_CS42_7DS_TGACv1_622272_AA2036850,TRIAE_CS42_6AS_TGACv1_486190_AA1557980
GO:0004345	glucose-6-phosphate dehydrogenase activity	molecular_function	0.0023138	0.025571	3	1928	13	74606	TRIAE_CS42_6DL_TGACv1_527365_AA1702830,TRIAE_CS42_6AL_TGACv1_473639_AA1532140,TRIAE_CS42_2AL_TGACv1_094970_AA0305380
GO:0050661	NADP binding	molecular_function	0.0023265	0.025571	13	1928	221	74606	TRIAE_CS42_2AL_TGACv1_094970_AA0305380,TRIAE_CS42_5BL_TGACv1_404321_AA1295470,TRIAE_CS42_6DL_TGACv1_526670_AA1689480,TRIAE_CS42_6AL_TGACv1_473639_AA1532140,TRIAE_CS42_5AL_TGACv1_374630_AA1204880,TRIAE_CS42_6BS_TGACv1_515835_AA1672680,TRIAE_CS42_6DS_TGACv1_542766_AA1729850,TRIAE_CS42_U_TGACv1_641432_AA2094970,TRIAE_CS42_3AS_TGACv1_210457_AA0672630,TRIAE_CS42_5AL_TGACv1_377360_AA1246170,TRIAE_CS42_…
GO:0003999	adenine phosphoribosyltransferase activity	molecular_function	0.0023319	0.025571	3	1928	9	74606	TRIAE_CS42_6BL_TGACv1_499716_AA1589820,TRIAE_CS42_6DL_TGACv1_528171_AA1712170,TRIAE_CS42_6AL_TGACv1_472192_AA1519000
GO:0006168	adenine salvage	biological_process	0.0023319	0.025571	3	1928	9	74606	TRIAE_CS42_6DL_TGACv1_528171_AA1712170,TRIAE_CS42_6BL_TGACv1_499716_AA1589820,TRIAE_CS42_6AL_TGACv1_472192_AA1519000
GO:0043096	purine nucleobase salvage	biological_process	0.0023319	0.025571	3	1928	9	74606	TRIAE_CS42_6AL_TGACv1_472192_AA1519000,TRIAE_CS42_6BL_TGACv1_499716_AA1589820,TRIAE_CS42_6DL_TGACv1_528171_AA1712170
GO:0046083	adenine metabolic process	biological_process	0.0023319	0.025571	3	1928	9	74606	TRIAE_CS42_6AL_TGACv1_472192_AA1519000,TRIAE_CS42_6BL_TGACv1_499716_AA1589820,TRIAE_CS42_6DL_TGACv1_528171_AA1712170
GO:0046084	adenine biosynthetic process	biological_process	0.0023319	0.025571	3	1928	9	74606	TRIAE_CS42_6DL_TGACv1_528171_AA1712170,TRIAE_CS42_6BL_TGACv1_499716_AA1589820,TRIAE_CS42_6AL_TGACv1_472192_AA1519000
GO:0003883	CTP synthase activity	molecular_function	0.00235	0.025685	3	1928	13	74606	TRIAE_CS42_3B_TGACv1_223258_AA0779170,TRIAE_CS42_3AL_TGACv1_194109_AA0626660,TRIAE_CS42_3DL_TGACv1_249279_AA0843940
GO:0044210	'de novo' CTP biosynthetic process	biological_process	0.00235	0.025685	3	1928	13	74606	TRIAE_CS42_3B_TGACv1_223258_AA0779170,TRIAE_CS42_3AL_TGACv1_194109_AA0626660,TRIAE_CS42_3DL_TGACv1_249279_AA0843940
GO:0005315	inorganic phosphate transmembrane transporter activity	molecular_function	0.0023806	0.025978	5	1928	40	74606	TRIAE_CS42_4AL_TGACv1_289623_AA0974220,TRIAE_CS42_3DS_TGACv1_272293_AA0918520,TRIAE_CS42_3AS_TGACv1_210574_AA0675360,TRIAE_CS42_4DS_TGACv1_361391_AA1166860,TRIAE_CS42_4BS_TGACv1_329699_AA1103360
GO:0030244	cellulose biosynthetic process	biological_process	0.0023999	0.02614	8	1928	117	74606	TRIAE_CS42_2AL_TGACv1_093096_AA0271930,TRIAE_CS42_2DS_TGACv1_180213_AA0610440,TRIAE_CS42_2BL_TGACv1_131489_AA0428400,TRIAE_CS42_2BS_TGACv1_147826_AA0487990,TRIAE_CS42_4BS_TGACv1_328010_AA1080930,TRIAE_CS42_4AL_TGACv1_289959_AA0979560,TRIAE_CS42_2DL_TGACv1_161143_AA0557040,TRIAE_CS42_4DS_TGACv1_361657_AA1171120
GO:0042170	plastid membrane	cellular_component	0.0024033	0.02614	8	1928	97	74606	TRIAE_CS42_4DL_TGACv1_343812_AA1140000,TRIAE_CS42_4BL_TGACv1_321702_AA1064290,TRIAE_CS42_4AL_TGACv1_289623_AA0974220,TRIAE_CS42_2DL_TGACv1_160210_AA0548190,TRIAE_CS42_3B_TGACv1_222044_AA0755670,TRIAE_CS42_4BS_TGACv1_329699_AA1103360,TRIAE_CS42_4DS_TGACv1_361391_AA1166860,TRIAE_CS42_4AS_TGACv1_306406_AA1007690
GO:0015766	disaccharide transport	biological_process	0.0024333	0.026339	4	1928	25	74606	TRIAE_CS42_7DL_TGACv1_604116_AA1994020,TRIAE_CS42_7AL_TGACv1_559693_AA1800520,TRIAE_CS42_U_TGACv1_641184_AA2087580,TRIAE_CS42_7BL_TGACv1_577849_AA1884560
GO:0015770	sucrose transport	biological_process	0.0024333	0.026339	4	1928	25	74606	TRIAE_CS42_7BL_TGACv1_577849_AA1884560,TRIAE_CS42_U_TGACv1_641184_AA2087580,TRIAE_CS42_7DL_TGACv1_604116_AA1994020,TRIAE_CS42_7AL_TGACv1_559693_AA1800520
GO:0015772	oligosaccharide transport	biological_process	0.0024333	0.026339	4	1928	25	74606	TRIAE_CS42_7AL_TGACv1_559693_AA1800520,TRIAE_CS42_7DL_TGACv1_604116_AA1994020,TRIAE_CS42_U_TGACv1_641184_AA2087580,TRIAE_CS42_7BL_TGACv1_577849_AA1884560
GO:0015698	inorganic anion transport	biological_process	0.0025129	0.027157	11	1928	177	74606	TRIAE_CS42_3AL_TGACv1_194874_AA0641130,TRIAE_CS42_4DL_TGACv1_342952_AA1125960,TRIAE_CS42_4BL_TGACv1_321851_AA1066240,TRIAE_CS42_3DL_TGACv1_252453_AA0890080,TRIAE_CS42_5AL_TGACv1_378731_AA1254390,TRIAE_CS42_4AS_TGACv1_306580_AA1010500,TRIAE_CS42_4DL_TGACv1_342488_AA1114970,TRIAE_CS42_3B_TGACv1_222757_AA0770040,TRIAE_CS42_3DS_TGACv1_272832_AA0925630,TRIAE_CS42_4DL_TGACv1_345350_AA1152790,TRIAE_CS42…
GO:0046365	monosaccharide catabolic process	biological_process	0.0025685	0.027713	3	1928	12	74606	TRIAE_CS42_3AL_TGACv1_196039_AA0656760,TRIAE_CS42_3B_TGACv1_222141_AA0758150,TRIAE_CS42_3DL_TGACv1_251020_AA0876220
GO:0043242	negative regulation of protein complex disassembly	biological_process	0.0026212	0.028102	3	1928	13	74606	TRIAE_CS42_4DL_TGACv1_342367_AA1111630,TRIAE_CS42_4AS_TGACv1_307317_AA1019370,TRIAE_CS42_4BS_TGACv1_329163_AA1098380
GO:0051494	negative regulation of cytoskeleton organization	biological_process	0.0026212	0.028102	3	1928	13	74606	TRIAE_CS42_4BS_TGACv1_329163_AA1098380,TRIAE_CS42_4AS_TGACv1_307317_AA1019370,TRIAE_CS42_4DL_TGACv1_342367_AA1111630
GO:1901879	regulation of protein depolymerization	biological_process	0.0026212	0.028102	3	1928	13	74606	TRIAE_CS42_4BS_TGACv1_329163_AA1098380,TRIAE_CS42_4AS_TGACv1_307317_AA1019370,TRIAE_CS42_4DL_TGACv1_342367_AA1111630
GO:1901880	negative regulation of protein depolymerization	biological_process	0.0026212	0.028102	3	1928	13	74606	TRIAE_CS42_4BS_TGACv1_329163_AA1098380,TRIAE_CS42_4AS_TGACv1_307317_AA1019370,TRIAE_CS42_4DL_TGACv1_342367_AA1111630
GO:0045824	negative regulation of innate immune response	biological_process	0.0027199	0.029067	3	1928	13	74606	TRIAE_CS42_1BL_TGACv1_030567_AA0094200,TRIAE_CS42_1AL_TGACv1_002853_AA0045580,TRIAE_CS42_1DL_TGACv1_062362_AA0213270
GO:0050777	negative regulation of immune response	biological_process	0.0027199	0.029067	3	1928	13	74606	TRIAE_CS42_1AL_TGACv1_002853_AA0045580,TRIAE_CS42_1BL_TGACv1_030567_AA0094200,TRIAE_CS42_1DL_TGACv1_062362_AA0213270
GO:0070838	divalent metal ion transport	biological_process	0.0027668	0.029474	9	1928	133	74606	TRIAE_CS42_U_TGACv1_640699_AA2069290,TRIAE_CS42_2BL_TGACv1_129973_AA0400750,TRIAE_CS42_4AL_TGACv1_288269_AA0942920,TRIAE_CS42_2DL_TGACv1_159040_AA0531140,TRIAE_CS42_3DL_TGACv1_249213_AA0841560,TRIAE_CS42_3AL_TGACv1_193642_AA0616060,TRIAE_CS42_2DL_TGACv1_159221_AA0534770,TRIAE_CS42_2AL_TGACv1_098072_AA0325680,TRIAE_CS42_2AL_TGACv1_093051_AA0270470
GO:0072511	divalent inorganic cation transport	biological_process	0.0027668	0.029474	9	1928	133	74606	TRIAE_CS42_2BL_TGACv1_129973_AA0400750,TRIAE_CS42_4AL_TGACv1_288269_AA0942920,TRIAE_CS42_U_TGACv1_640699_AA2069290,TRIAE_CS42_3AL_TGACv1_193642_AA0616060,TRIAE_CS42_2DL_TGACv1_159221_AA0534770,TRIAE_CS42_2AL_TGACv1_098072_AA0325680,TRIAE_CS42_2AL_TGACv1_093051_AA0270470,TRIAE_CS42_3DL_TGACv1_249213_AA0841560,TRIAE_CS42_2DL_TGACv1_159040_AA0531140
GO:0055114	oxidation-reduction process	biological_process	0.00284	0.030207	192	1928	5972	74606	TRIAE_CS42_1DL_TGACv1_061075_AA0184240,TRIAE_CS42_6DS_TGACv1_543770_AA1744010,TRIAE_CS42_7BL_TGACv1_578344_AA1893330,TRIAE_CS42_2DS_TGACv1_177565_AA0580190,TRIAE_CS42_1DL_TGACv1_061562_AA0198710,TRIAE_CS42_3B_TGACv1_221981_AA0754380,TRIAE_CS42_5BL_TGACv1_404321_AA1295470,TRIAE_CS42_7AS_TGACv1_569986_AA1828160,TRIAE_CS42_2DL_TGACv1_161036_AA0556200,TRIAE_CS42_7DL_TGACv1_604354_AA1997220,TRIAE_CS42…
GO:0030118	clathrin coat	cellular_component	0.0029044	0.030843	5	1928	45	74606	TRIAE_CS42_4AL_TGACv1_288747_AA0957130,TRIAE_CS42_4BS_TGACv1_328452_AA1088030,TRIAE_CS42_7DL_TGACv1_602635_AA1963430,TRIAE_CS42_7AL_TGACv1_556695_AA1769100,TRIAE_CS42_4DS_TGACv1_362497_AA1180110
GO:0006221	pyrimidine nucleotide biosynthetic process	biological_process	0.0029432	0.031205	7	1928	72	74606	TRIAE_CS42_3DL_TGACv1_249279_AA0843940,TRIAE_CS42_2BS_TGACv1_146900_AA0475120,TRIAE_CS42_1BL_TGACv1_030377_AA0088540,TRIAE_CS42_1AL_TGACv1_000492_AA0013410,TRIAE_CS42_3AL_TGACv1_194109_AA0626660,TRIAE_CS42_1DL_TGACv1_061176_AA0187850,TRIAE_CS42_3B_TGACv1_223258_AA0779170
GO:0004642	phosphoribosylformylglycinamidine synthase activity	molecular_function	0.0029511	0.031239	2	1928	6	74606	TRIAE_CS42_1DL_TGACv1_063573_AA0228750,TRIAE_CS42_1AL_TGACv1_000512_AA0013610
GO:0004659	prenyltransferase activity	molecular_function	0.0031131	0.032903	6	1928	60	74606	TRIAE_CS42_7DL_TGACv1_604116_AA1994020,TRIAE_CS42_7AL_TGACv1_559693_AA1800520,TRIAE_CS42_1DL_TGACv1_061444_AA0195450,TRIAE_CS42_1AL_TGACv1_002642_AA0044130,TRIAE_CS42_7BL_TGACv1_577849_AA1884560,TRIAE_CS42_1BL_TGACv1_031194_AA0109500
GO:1990542	mitochondrial transmembrane transport	biological_process	0.0031447	0.033185	5	1928	31	74606	TRIAE_CS42_4DL_TGACv1_343137_AA1130350,TRIAE_CS42_3B_TGACv1_223525_AA0783520,TRIAE_CS42_3AL_TGACv1_194730_AA0638300,TRIAE_CS42_3B_TGACv1_223093_AA0776380,TRIAE_CS42_4BL_TGACv1_321242_AA1057770
GO:0005543	phospholipid binding	molecular_function	0.0031874	0.033583	9	1928	128	74606	TRIAE_CS42_3B_TGACv1_221849_AA0751620,TRIAE_CS42_3B_TGACv1_222044_AA0755670,TRIAE_CS42_3DL_TGACv1_250864_AA0874390,TRIAE_CS42_3DL_TGACv1_250339_AA0866430,TRIAE_CS42_7BS_TGACv1_594170_AA1956450,TRIAE_CS42_3B_TGACv1_220835_AA0720860,TRIAE_CS42_3AL_TGACv1_194328_AA0631110,TRIAE_CS42_6BL_TGACv1_500076_AA1598300,TRIAE_CS42_6DL_TGACv1_526383_AA1681400
GO:0006545	glycine biosynthetic process	biological_process	0.0032229	0.033904	3	1928	14	74606	TRIAE_CS42_2DL_TGACv1_159916_AA0544360,TRIAE_CS42_2BL_TGACv1_129567_AA0388870,TRIAE_CS42_2AL_TGACv1_094077_AA0292210
GO:0009142	nucleoside triphosphate biosynthetic process	biological_process	0.0032631	0.034219	10	1928	125	74606	TRIAE_CS42_3DL_TGACv1_249279_AA0843940,TRIAE_CS42_2DL_TGACv1_158421_AA0518370,TRIAE_CS42_1DL_TGACv1_062210_AA0210500,TRIAE_CS42_1BL_TGACv1_030377_AA0088540,TRIAE_CS42_1DL_TGACv1_061176_AA0187850,TRIAE_CS42_1BL_TGACv1_031692_AA0118950,TRIAE_CS42_1AL_TGACv1_000492_AA0013410,TRIAE_CS42_1AL_TGACv1_004040_AA0052320,TRIAE_CS42_3B_TGACv1_223258_AA0779170,TRIAE_CS42_3AL_TGACv1_194109_AA0626660
GO:0009201	ribonucleoside triphosphate biosynthetic process	biological_process	0.0032631	0.034219	10	1928	125	74606	TRIAE_CS42_3B_TGACv1_223258_AA0779170,TRIAE_CS42_1AL_TGACv1_004040_AA0052320,TRIAE_CS42_3AL_TGACv1_194109_AA0626660,TRIAE_CS42_1AL_TGACv1_000492_AA0013410,TRIAE_CS42_1BL_TGACv1_031692_AA0118950,TRIAE_CS42_3DL_TGACv1_249279_AA0843940,TRIAE_CS42_1DL_TGACv1_061176_AA0187850,TRIAE_CS42_1DL_TGACv1_062210_AA0210500,TRIAE_CS42_2DL_TGACv1_158421_AA0518370,TRIAE_CS42_1BL_TGACv1_030377_AA0088540
GO:0016645	oxidoreductase activity, acting on the CH-NH group of donors	molecular_function	0.0032815	0.034358	6	1928	63	74606	TRIAE_CS42_1DL_TGACv1_061075_AA0184240,TRIAE_CS42_5BL_TGACv1_406345_AA1344380,TRIAE_CS42_7DL_TGACv1_603091_AA1975740,TRIAE_CS42_1BL_TGACv1_031106_AA0107890,TRIAE_CS42_1AL_TGACv1_002153_AA0039220,TRIAE_CS42_5AL_TGACv1_374680_AA1206310
GO:1901476	carbohydrate transporter activity	molecular_function	0.0034354	0.035893	5	1928	44	74606	TRIAE_CS42_2BL_TGACv1_129391_AA0381430,TRIAE_CS42_4BS_TGACv1_329699_AA1103360,TRIAE_CS42_4DS_TGACv1_361391_AA1166860,TRIAE_CS42_U_TGACv1_641184_AA2087580,TRIAE_CS42_4AL_TGACv1_289623_AA0974220
GO:0043174	nucleoside salvage	biological_process	0.003444	0.035893	3	1928	14	74606	TRIAE_CS42_6DL_TGACv1_526952_AA1695860,TRIAE_CS42_6BL_TGACv1_499360_AA1579440,TRIAE_CS42_6AL_TGACv1_473321_AA1530120
GO:0051273	beta-glucan metabolic process	biological_process	0.0034441	0.035893	11	1928	210	74606	TRIAE_CS42_5AL_TGACv1_375073_AA1215420,TRIAE_CS42_2BL_TGACv1_131489_AA0428400,TRIAE_CS42_2BS_TGACv1_147826_AA0487990,TRIAE_CS42_2DS_TGACv1_180213_AA0610440,TRIAE_CS42_2AL_TGACv1_093096_AA0271930,TRIAE_CS42_5DL_TGACv1_438060_AA1467880,TRIAE_CS42_4DS_TGACv1_361657_AA1171120,TRIAE_CS42_4AL_TGACv1_289959_AA0979560,TRIAE_CS42_4BS_TGACv1_328010_AA1080930,TRIAE_CS42_5BL_TGACv1_404684_AA1308350,TRIAE_CS4…
GO:0036442	hydrogen-exporting ATPase activity	molecular_function	0.0034506	0.035905	5	1928	46	74606	TRIAE_CS42_3AL_TGACv1_195562_AA0651220,TRIAE_CS42_3DL_TGACv1_250717_AA0872310,TRIAE_CS42_3B_TGACv1_221643_AA0746430,TRIAE_CS42_7AL_TGACv1_559344_AA1799200,TRIAE_CS42_7BL_TGACv1_579063_AA1903600
GO:0080134	regulation of response to stress	biological_process	0.0035085	0.036421	13	1928	220	74606	TRIAE_CS42_1BL_TGACv1_034437_AA0144510,TRIAE_CS42_1DL_TGACv1_062362_AA0213270,TRIAE_CS42_7AL_TGACv1_559693_AA1800520,TRIAE_CS42_1BS_TGACv1_049680_AA0159500,TRIAE_CS42_1DL_TGACv1_062962_AA0222290,TRIAE_CS42_1DL_TGACv1_061262_AA0190390,TRIAE_CS42_7BL_TGACv1_577849_AA1884560,TRIAE_CS42_3B_TGACv1_229631_AA0828970,TRIAE_CS42_1BL_TGACv1_032262_AA0127620,TRIAE_CS42_7DL_TGACv1_604116_AA1994020,TRIAE_CS42…
GO:0009505	plant-type cell wall	cellular_component	0.003511	0.036421	7	1928	83	74606	TRIAE_CS42_3DL_TGACv1_251228_AA0879080,TRIAE_CS42_3AS_TGACv1_210640_AA0676180,TRIAE_CS42_3B_TGACv1_222825_AA0771410,TRIAE_CS42_1BS_TGACv1_049652_AA0158940,TRIAE_CS42_2DL_TGACv1_159965_AA0544980,TRIAE_CS42_3DS_TGACv1_271499_AA0900440,TRIAE_CS42_U_TGACv1_641240_AA2089370
GO:0004356	glutamate-ammonia ligase activity	molecular_function	0.0035513	0.036614	3	1928	14	74606	TRIAE_CS42_6BL_TGACv1_500652_AA1608010,TRIAE_CS42_6DL_TGACv1_527226_AA1700820,TRIAE_CS42_4AS_TGACv1_307728_AA1023060
GO:0006542	glutamine biosynthetic process	biological_process	0.0035513	0.036614	3	1928	14	74606	TRIAE_CS42_6BL_TGACv1_500652_AA1608010,TRIAE_CS42_6DL_TGACv1_527226_AA1700820,TRIAE_CS42_4AS_TGACv1_307728_AA1023060
GO:0016211	ammonia ligase activity	molecular_function	0.0035513	0.036614	3	1928	14	74606	TRIAE_CS42_6BL_TGACv1_500652_AA1608010,TRIAE_CS42_4AS_TGACv1_307728_AA1023060,TRIAE_CS42_6DL_TGACv1_527226_AA1700820
GO:0016880	acid-ammonia (or amide) ligase activity	molecular_function	0.0035513	0.036614	3	1928	14	74606	TRIAE_CS42_4AS_TGACv1_307728_AA1023060,TRIAE_CS42_6DL_TGACv1_527226_AA1700820,TRIAE_CS42_6BL_TGACv1_500652_AA1608010
GO:0043036	starch grain	cellular_component	0.0035819	0.036872	3	1928	14	74606	TRIAE_CS42_2BL_TGACv1_131614_AA0429850,TRIAE_CS42_2AL_TGACv1_093163_AA0273760,TRIAE_CS42_5AL_TGACv1_374631_AA1204970
GO:0006544	glycine metabolic process	biological_process	0.003654	0.037475	4	1928	26	74606	TRIAE_CS42_2DL_TGACv1_159916_AA0544360,TRIAE_CS42_2BL_TGACv1_129567_AA0388870,TRIAE_CS42_2AL_TGACv1_094077_AA0292210,TRIAE_CS42_6AS_TGACv1_485264_AA1542040
GO:0006020	inositol metabolic process	biological_process	0.0036668	0.037475	3	1928	13	74606	TRIAE_CS42_7DL_TGACv1_602694_AA1965500,TRIAE_CS42_4AL_TGACv1_288528_AA0951160,TRIAE_CS42_4BS_TGACv1_328490_AA1088680
GO:0006775	fat-soluble vitamin metabolic process	biological_process	0.0036739	0.037475	3	1928	13	74606	TRIAE_CS42_7DL_TGACv1_604116_AA1994020,TRIAE_CS42_7AL_TGACv1_559693_AA1800520,TRIAE_CS42_7BL_TGACv1_577849_AA1884560
GO:0010189	vitamin E biosynthetic process	biological_process	0.0036739	0.037475	3	1928	13	74606	TRIAE_CS42_7AL_TGACv1_559693_AA1800520,TRIAE_CS42_7DL_TGACv1_604116_AA1994020,TRIAE_CS42_7BL_TGACv1_577849_AA1884560
GO:0042360	vitamin E metabolic process	biological_process	0.0036739	0.037475	3	1928	13	74606	TRIAE_CS42_7AL_TGACv1_559693_AA1800520,TRIAE_CS42_7DL_TGACv1_604116_AA1994020,TRIAE_CS42_7BL_TGACv1_577849_AA1884560
GO:0042362	fat-soluble vitamin biosynthetic process	biological_process	0.0036739	0.037475	3	1928	13	74606	TRIAE_CS42_7DL_TGACv1_604116_AA1994020,TRIAE_CS42_7AL_TGACv1_559693_AA1800520,TRIAE_CS42_7BL_TGACv1_577849_AA1884560
GO:0006167	AMP biosynthetic process	biological_process	0.0037398	0.037992	3	1928	14	74606	TRIAE_CS42_6DL_TGACv1_526952_AA1695860,TRIAE_CS42_6AL_TGACv1_473321_AA1530120,TRIAE_CS42_6BL_TGACv1_499360_AA1579440
GO:0046033	AMP metabolic process	biological_process	0.0037398	0.037992	3	1928	14	74606	TRIAE_CS42_6AL_TGACv1_473321_AA1530120,TRIAE_CS42_6BL_TGACv1_499360_AA1579440,TRIAE_CS42_6DL_TGACv1_526952_AA1695860
GO:0000906	6,7-dimethyl-8-ribityllumazine synthase activity	molecular_function	0.0037529	0.037992	2	1928	3	74606	TRIAE_CS42_2DL_TGACv1_158000_AA0505500,TRIAE_CS42_2AL_TGACv1_094865_AA0304200
GO:0009349	riboflavin synthase complex	cellular_component	0.0037529	0.037992	2	1928	3	74606	TRIAE_CS42_2DL_TGACv1_158000_AA0505500,TRIAE_CS42_2AL_TGACv1_094865_AA0304200
GO:0016867	intramolecular transferase activity, transferring acyl groups	molecular_function	0.0037529	0.037992	2	1928	3	74606	TRIAE_CS42_2DL_TGACv1_158000_AA0505500,TRIAE_CS42_2AL_TGACv1_094865_AA0304200
GO:0006720	isoprenoid metabolic process	biological_process	0.0038065	0.038477	11	1928	178	74606	TRIAE_CS42_4DS_TGACv1_361391_AA1166860,TRIAE_CS42_4BS_TGACv1_329699_AA1103360,TRIAE_CS42_1BL_TGACv1_031194_AA0109500,TRIAE_CS42_7DS_TGACv1_623117_AA2049760,TRIAE_CS42_1AL_TGACv1_002642_AA0044130,TRIAE_CS42_5DL_TGACv1_434775_AA1441440,TRIAE_CS42_4AL_TGACv1_289623_AA0974220,TRIAE_CS42_2AS_TGACv1_112052_AA0328860,TRIAE_CS42_1DL_TGACv1_061444_AA0195450,TRIAE_CS42_7BS_TGACv1_591893_AA1924780,TRIAE_CS4…
GO:0071949	FAD binding	molecular_function	0.0038803	0.039164	6	1928	67	74606	TRIAE_CS42_3DS_TGACv1_273835_AA0933610,TRIAE_CS42_7BS_TGACv1_592026_AA1928570,TRIAE_CS42_3AS_TGACv1_211390_AA0689620,TRIAE_CS42_7AL_TGACv1_556096_AA1755360,TRIAE_CS42_7DS_TGACv1_622043_AA2031500,TRIAE_CS42_3B_TGACv1_224606_AA0798680
GO:0015937	coenzyme A biosynthetic process	biological_process	0.0039142	0.039271	3	1928	13	74606	TRIAE_CS42_5AL_TGACv1_374789_AA1209000,TRIAE_CS42_5DL_TGACv1_435540_AA1451810,TRIAE_CS42_5BL_TGACv1_406155_AA1341460
GO:0033866	nucleoside bisphosphate biosynthetic process	biological_process	0.0039142	0.039271	3	1928	13	74606	TRIAE_CS42_5AL_TGACv1_374789_AA1209000,TRIAE_CS42_5DL_TGACv1_435540_AA1451810,TRIAE_CS42_5BL_TGACv1_406155_AA1341460
GO:0034030	ribonucleoside bisphosphate biosynthetic process	biological_process	0.0039142	0.039271	3	1928	13	74606	TRIAE_CS42_5BL_TGACv1_406155_AA1341460,TRIAE_CS42_5AL_TGACv1_374789_AA1209000,TRIAE_CS42_5DL_TGACv1_435540_AA1451810
GO:0034033	purine nucleoside bisphosphate biosynthetic process	biological_process	0.0039142	0.039271	3	1928	13	74606	TRIAE_CS42_5BL_TGACv1_406155_AA1341460,TRIAE_CS42_5DL_TGACv1_435540_AA1451810,TRIAE_CS42_5AL_TGACv1_374789_AA1209000
GO:0009164	nucleoside catabolic process	biological_process	0.0039473	0.039426	3	1928	13	74606	TRIAE_CS42_2AL_TGACv1_094077_AA0292200,TRIAE_CS42_2AL_TGACv1_094486_AA0298610,TRIAE_CS42_2DL_TGACv1_158777_AA0526010
GO:0042454	ribonucleoside catabolic process	biological_process	0.0039473	0.039426	3	1928	13	74606	TRIAE_CS42_2AL_TGACv1_094486_AA0298610,TRIAE_CS42_2DL_TGACv1_158777_AA0526010,TRIAE_CS42_2AL_TGACv1_094077_AA0292200
GO:1901658	glycosyl compound catabolic process	biological_process	0.0039473	0.039426	3	1928	13	74606	TRIAE_CS42_2AL_TGACv1_094486_AA0298610,TRIAE_CS42_2DL_TGACv1_158777_AA0526010,TRIAE_CS42_2AL_TGACv1_094077_AA0292200
GO:0035251	UDP-glucosyltransferase activity	molecular_function	0.0040135	0.040028	10	1928	201	74606	TRIAE_CS42_2AL_TGACv1_093163_AA0273760,TRIAE_CS42_1DL_TGACv1_062182_AA0210070,TRIAE_CS42_1DL_TGACv1_061317_AA0192320,TRIAE_CS42_1BL_TGACv1_031136_AA0108420,TRIAE_CS42_1BL_TGACv1_031944_AA0123110,TRIAE_CS42_2BL_TGACv1_131141_AA0423210,TRIAE_CS42_2DL_TGACv1_159587_AA0540290,TRIAE_CS42_1AL_TGACv1_000384_AA0010710,TRIAE_CS42_2BL_TGACv1_131614_AA0429850,TRIAE_CS42_1AL_TGACv1_001119_AA0025400
GO:0019206	nucleoside kinase activity	molecular_function	0.004053	0.040362	3	1928	15	74606	TRIAE_CS42_6BL_TGACv1_499360_AA1579440,TRIAE_CS42_6AL_TGACv1_473321_AA1530120,TRIAE_CS42_6DL_TGACv1_526952_AA1695860
GO:0007076	mitotic chromosome condensation	biological_process	0.0041694	0.041459	3	1928	16	74606	TRIAE_CS42_3AL_TGACv1_195859_AA0654910,TRIAE_CS42_2AL_TGACv1_098666_AA0326490,TRIAE_CS42_3B_TGACv1_226023_AA0813450
GO:0006816	calcium ion transport	biological_process	0.0043118	0.042812	5	1928	58	74606	TRIAE_CS42_2DL_TGACv1_159040_AA0531140,TRIAE_CS42_4AL_TGACv1_288269_AA0942920,TRIAE_CS42_2BL_TGACv1_129973_AA0400750,TRIAE_CS42_3DL_TGACv1_249213_AA0841560,TRIAE_CS42_2AL_TGACv1_093051_AA0270470
GO:0004619	phosphoglycerate mutase activity	molecular_function	0.0043631	0.043258	3	1928	15	74606	TRIAE_CS42_3DL_TGACv1_251020_AA0876220,TRIAE_CS42_3B_TGACv1_222141_AA0758150,TRIAE_CS42_3AL_TGACv1_196039_AA0656760
GO:0048316	seed development	biological_process	0.0043974	0.043534	17	1928	340	74606	TRIAE_CS42_3B_TGACv1_221849_AA0751620,TRIAE_CS42_1BL_TGACv1_031944_AA0123110,TRIAE_CS42_7DS_TGACv1_621538_AA2018830,TRIAE_CS42_3DL_TGACv1_250864_AA0874390,TRIAE_CS42_1AL_TGACv1_001119_AA0025400,TRIAE_CS42_7AS_TGACv1_570244_AA1832810,TRIAE_CS42_7DS_TGACv1_621997_AA2030830,TRIAE_CS42_2AS_TGACv1_112739_AA0344340,TRIAE_CS42_7AS_TGACv1_570758_AA1840530,TRIAE_CS42_U_TGACv1_640757_AA2072670,TRIAE_CS42_2…
GO:0008202	steroid metabolic process	biological_process	0.004442	0.043911	8	1928	101	74606	TRIAE_CS42_4DL_TGACv1_343724_AA1138650,TRIAE_CS42_4BL_TGACv1_320400_AA1037850,TRIAE_CS42_4AS_TGACv1_308060_AA1025550,TRIAE_CS42_5AL_TGACv1_378173_AA1251720,TRIAE_CS42_7BS_TGACv1_591893_AA1924780,TRIAE_CS42_3B_TGACv1_222513_AA0766220,TRIAE_CS42_3AL_TGACv1_194203_AA0628440,TRIAE_CS42_7DS_TGACv1_623117_AA2049760
GO:0043624	cellular protein complex disassembly	biological_process	0.0044503	0.043928	8	1928	88	74606	TRIAE_CS42_5DL_TGACv1_433016_AA1398230,TRIAE_CS42_4DS_TGACv1_362974_AA1182930,TRIAE_CS42_4BS_TGACv1_329163_AA1098380,TRIAE_CS42_5BL_TGACv1_406522_AA1346490,TRIAE_CS42_1BS_TGACv1_049965_AA0164830,TRIAE_CS42_4DL_TGACv1_342367_AA1111630,TRIAE_CS42_4AS_TGACv1_307317_AA1019370,TRIAE_CS42_5AL_TGACv1_375015_AA1213980
GO:0080036	regulation of cytokinin-activated signaling pathway	biological_process	0.004461	0.043969	3	1928	12	74606	TRIAE_CS42_U_TGACv1_640854_AA2077410,TRIAE_CS42_7DS_TGACv1_623153_AA2050180,TRIAE_CS42_7BS_TGACv1_591976_AA1927160
GO:0046527	glucosyltransferase activity	molecular_function	0.0045055	0.044254	10	1928	204	74606	TRIAE_CS42_2DL_TGACv1_159587_AA0540290,TRIAE_CS42_2BL_TGACv1_131141_AA0423210,TRIAE_CS42_1BL_TGACv1_031944_AA0123110,TRIAE_CS42_1AL_TGACv1_001119_AA0025400,TRIAE_CS42_1AL_TGACv1_000384_AA0010710,TRIAE_CS42_2BL_TGACv1_131614_AA0429850,TRIAE_CS42_1DL_TGACv1_061317_AA0192320,TRIAE_CS42_1DL_TGACv1_062182_AA0210070,TRIAE_CS42_2AL_TGACv1_093163_AA0273760,TRIAE_CS42_1BL_TGACv1_031136_AA0108420
GO:0048608	reproductive structure development	biological_process	0.0045097	0.044254	27	1928	657	74606	TRIAE_CS42_7AS_TGACv1_570758_AA1840530,TRIAE_CS42_6BL_TGACv1_499837_AA1592870,TRIAE_CS42_7DS_TGACv1_621997_AA2030830,TRIAE_CS42_2AS_TGACv1_112739_AA0344340,TRIAE_CS42_2AS_TGACv1_113039_AA0350300,TRIAE_CS42_5BL_TGACv1_404530_AA1303120,TRIAE_CS42_U_TGACv1_640757_AA2072670,TRIAE_CS42_U_TGACv1_644248_AA2138300,TRIAE_CS42_1BL_TGACv1_031520_AA0115500,TRIAE_CS42_4AL_TGACv1_289752_AA0976330,TRIAE_CS42_2A…
GO:0061458	reproductive system development	biological_process	0.0045097	0.044254	27	1928	657	74606	TRIAE_CS42_1AL_TGACv1_005510_AA0054870,TRIAE_CS42_2DS_TGACv1_179266_AA0605730,TRIAE_CS42_1BS_TGACv1_049652_AA0158940,TRIAE_CS42_5BL_TGACv1_405128_AA1320750,TRIAE_CS42_U_TGACv1_642463_AA2118090,TRIAE_CS42_1DL_TGACv1_061317_AA0192320,TRIAE_CS42_U_TGACv1_643385_AA2131440,TRIAE_CS42_6DS_TGACv1_543504_AA1740860,TRIAE_CS42_3B_TGACv1_221849_AA0751620,TRIAE_CS42_1BL_TGACv1_031944_AA0123110,TRIAE_CS42_6AS…
GO:0004743	pyruvate kinase activity	molecular_function	0.0045882	0.044829	4	1928	31	74606	TRIAE_CS42_4BS_TGACv1_330279_AA1106910,TRIAE_CS42_2AS_TGACv1_112739_AA0344340,TRIAE_CS42_4DS_TGACv1_362522_AA1180350,TRIAE_CS42_1BL_TGACv1_030605_AA0095500
GO:0030955	potassium ion binding	molecular_function	0.0045882	0.044829	4	1928	31	74606	TRIAE_CS42_4DS_TGACv1_362522_AA1180350,TRIAE_CS42_1BL_TGACv1_030605_AA0095500,TRIAE_CS42_4BS_TGACv1_330279_AA1106910,TRIAE_CS42_2AS_TGACv1_112739_AA0344340
GO:0031420	alkali metal ion binding	molecular_function	0.0045882	0.044829	4	1928	31	74606	TRIAE_CS42_1BL_TGACv1_030605_AA0095500,TRIAE_CS42_4DS_TGACv1_362522_AA1180350,TRIAE_CS42_2AS_TGACv1_112739_AA0344340,TRIAE_CS42_4BS_TGACv1_330279_AA1106910
GO:0003727	single-stranded RNA binding	molecular_function	0.0046434	0.045302	3	1928	13	74606	TRIAE_CS42_4BL_TGACv1_321702_AA1064290,TRIAE_CS42_4DL_TGACv1_343812_AA1140000,TRIAE_CS42_4AS_TGACv1_306406_AA1007690
GO:0044282	small molecule catabolic process	biological_process	0.0046611	0.045409	13	1928	242	74606	TRIAE_CS42_2DL_TGACv1_158777_AA0526010,TRIAE_CS42_6AS_TGACv1_485264_AA1542040,TRIAE_CS42_3B_TGACv1_222141_AA0758150,TRIAE_CS42_3AL_TGACv1_196039_AA0656760,TRIAE_CS42_2AL_TGACv1_094077_AA0292200,TRIAE_CS42_4AL_TGACv1_288528_AA0951160,TRIAE_CS42_4BS_TGACv1_328490_AA1088680,TRIAE_CS42_3DL_TGACv1_250245_AA0864940,TRIAE_CS42_7DL_TGACv1_602694_AA1965500,TRIAE_CS42_2AL_TGACv1_094486_AA0298610,TRIAE_CS42…
GO:0002831	regulation of response to biotic stimulus	biological_process	0.0047269	0.045978	6	1928	56	74606	TRIAE_CS42_1BL_TGACv1_034437_AA0144510,TRIAE_CS42_3B_TGACv1_229631_AA0828970,TRIAE_CS42_1DL_TGACv1_061262_AA0190390,TRIAE_CS42_1BL_TGACv1_032262_AA0127620,TRIAE_CS42_1AL_TGACv1_002619_AA0043740,TRIAE_CS42_1DL_TGACv1_062962_AA0222290
GO:0006888	ER to Golgi vesicle-mediated transport	biological_process	0.0047332	0.045978	6	1928	66	74606	TRIAE_CS42_5AL_TGACv1_374451_AA1200460,TRIAE_CS42_2BL_TGACv1_131305_AA0425720,TRIAE_CS42_4BL_TGACv1_320261_AA1032800,TRIAE_CS42_4DS_TGACv1_361471_AA1168550,TRIAE_CS42_2AL_TGACv1_093387_AA0279030,TRIAE_CS42_2DL_TGACv1_158815_AA0526570
GO:0071322	cellular response to carbohydrate stimulus	biological_process	0.0048861	0.047394	3	1928	17	74606	TRIAE_CS42_1AL_TGACv1_001119_AA0025400,TRIAE_CS42_1DL_TGACv1_061317_AA0192320,TRIAE_CS42_1BL_TGACv1_031944_AA0123110
GO:0009249	protein lipoylation	biological_process	0.0051419	0.049804	3	1928	14	74606	TRIAE_CS42_1BL_TGACv1_030654_AA0097000,TRIAE_CS42_1DL_TGACv1_061125_AA0186220,TRIAE_CS42_1AL_TGACv1_000132_AA0004290
