# Supplementary material for: Impact of Heat Stress on Expression of Wheat Genes Responsive to Hessian Fly Infestation
Source: Plants (Basel). 2022 May 25;11(11):1402. doi: 10.3390/plants11111402 (PMC9183101; doi:10.3390/plants11111402)
Supplement: Supplementary file 1 [file plants-11-01402-s001.zip › Table S3.xlsx]

## Sheet: Table S3
Table S3. Significantly enriched GO terms with upregualted DEGs due to the combination of heat stress and HF infestation ( HF+Heat vs CK comparison).
GO_accession	Description	Term_type	Over_represented_pValue	Corrected_pValue	DEG_item	DEG_list	Bg_item	Bg_list	Gene_names
GO:0008061	chitin binding	molecular_function	2.7362e-11	1.8393e-07	16	2591	64	74606	TRIAE_CS42_2BS_TGACv1_146201_AA0458680,TRIAE_CS42_7AL_TGACv1_558763_AA1795910,TRIAE_CS42_3B_TGACv1_226118_AA0814050,TRIAE_CS42_6DL_TGACv1_527923_AA1709960,TRIAE_CS42_2AL_TGACv1_096750_AA0321140,TRIAE_CS42_1DL_TGACv1_061306_AA0192040,TRIAE_CS42_2DL_TGACv1_158075_AA0508060,TRIAE_CS42_1AL_TGACv1_003139_AA0048110,TRIAE_CS42_7AL_TGACv1_558763_AA1795920,TRIAE_CS42_U_TGACv1_642890_AA2124500,TRIAE_CS42_3…
GO:0009408	response to heat	biological_process	8.2127e-10	2.7603e-06	23	2591	140	74606	TRIAE_CS42_7DL_TGACv1_606295_AA2009680,TRIAE_CS42_4DL_TGACv1_343907_AA1141350,TRIAE_CS42_7AL_TGACv1_557440_AA1781370,TRIAE_CS42_5BL_TGACv1_407726_AA1359190,TRIAE_CS42_4AS_TGACv1_307377_AA1019960,TRIAE_CS42_4DL_TGACv1_343090_AA1129350,TRIAE_CS42_U_TGACv1_643016_AA2126240,TRIAE_CS42_3B_TGACv1_222345_AA0762610,TRIAE_CS42_4DL_TGACv1_343575_AA1136840,TRIAE_CS42_4AS_TGACv1_307652_AA1022370,TRIAE_CS42_2…
GO:0046872	metal ion binding	molecular_function	3.4813e-09	5.9569e-06	430	2591	9455	74606	TRIAE_CS42_3DS_TGACv1_272244_AA0917680,TRIAE_CS42_5BL_TGACv1_407462_AA1357150,TRIAE_CS42_1AL_TGACv1_000245_AA0007130,TRIAE_CS42_2DS_TGACv1_177342_AA0574110,TRIAE_CS42_7DS_TGACv1_623408_AA2052840,TRIAE_CS42_4DL_TGACv1_344070_AA1143260,TRIAE_CS42_5DL_TGACv1_433069_AA1400580,TRIAE_CS42_1DL_TGACv1_061267_AA0190570,TRIAE_CS42_7DL_TGACv1_603647_AA1986740,TRIAE_CS42_7DS_TGACv1_621501_AA2017680,TRIAE_CS4…
GO:0005385	zinc ion transmembrane transporter activity	molecular_function	4.153e-09	5.9569e-06	12	2591	39	74606	TRIAE_CS42_7AL_TGACv1_558208_AA1791260,TRIAE_CS42_1DS_TGACv1_082535_AA0264750,TRIAE_CS42_2AL_TGACv1_094530_AA0299310,TRIAE_CS42_1BS_TGACv1_049369_AA0150920,TRIAE_CS42_1AS_TGACv1_018996_AA0057560,TRIAE_CS42_1DS_TGACv1_082083_AA0263760,TRIAE_CS42_7DL_TGACv1_603327_AA1981040,TRIAE_CS42_1BS_TGACv1_050073_AA0167090,TRIAE_CS42_2BL_TGACv1_129658_AA0391920,TRIAE_CS42_7BL_TGACv1_577920_AA1886220,TRIAE_CS4…
GO:0043169	cation binding	molecular_function	5.0128e-09	5.9569e-06	430	2591	9480	74606	TRIAE_CS42_7BS_TGACv1_592541_AA1940080,TRIAE_CS42_6AL_TGACv1_472548_AA1523440,TRIAE_CS42_3B_TGACv1_228193_AA0826230,TRIAE_CS42_7AS_TGACv1_569178_AA1809270,TRIAE_CS42_7DS_TGACv1_622968_AA2047940,TRIAE_CS42_1BS_TGACv1_049912_AA0164130,TRIAE_CS42_5AL_TGACv1_374696_AA1206820,BAE47682,TRIAE_CS42_6BL_TGACv1_502483_AA1624950,TRIAE_CS42_4AL_TGACv1_290316_AA0983970,TRIAE_CS42_4AL_TGACv1_290152_AA0982300,T…
GO:0071577	zinc II ion transmembrane transport	biological_process	6.092e-09	5.9569e-06	12	2591	40	74606	TRIAE_CS42_1DS_TGACv1_082083_AA0263760,TRIAE_CS42_7DL_TGACv1_603327_AA1981040,TRIAE_CS42_1BS_TGACv1_050073_AA0167090,TRIAE_CS42_2BL_TGACv1_129658_AA0391920,TRIAE_CS42_7AL_TGACv1_558208_AA1791260,TRIAE_CS42_1DS_TGACv1_082535_AA0264750,TRIAE_CS42_1AS_TGACv1_018996_AA0057560,TRIAE_CS42_1BS_TGACv1_049369_AA0150920,TRIAE_CS42_2AL_TGACv1_094530_AA0299310,TRIAE_CS42_7AL_TGACv1_558847_AA1796430,TRIAE_CS4…
GO:0046622	positive regulation of organ growth	biological_process	6.2032e-09	5.9569e-06	7	2591	12	74606	TRIAE_CS42_2AL_TGACv1_094156_AA0293460,TRIAE_CS42_1DL_TGACv1_061536_AA0198180,TRIAE_CS42_3AL_TGACv1_198419_AA0668610,TRIAE_CS42_U_TGACv1_641037_AA2082910,TRIAE_CS42_3DL_TGACv1_253118_AA0893450,TRIAE_CS42_2BL_TGACv1_131186_AA0424110,TRIAE_CS42_1AL_TGACv1_001774_AA0034980
GO:0006829	zinc II ion transport	biological_process	1.4285e-08	8.3886e-06	12	2591	43	74606	TRIAE_CS42_7BL_TGACv1_577920_AA1886220,TRIAE_CS42_1AL_TGACv1_000915_AA0021770,TRIAE_CS42_7AL_TGACv1_558847_AA1796430,TRIAE_CS42_7AL_TGACv1_558208_AA1791260,TRIAE_CS42_1DS_TGACv1_082535_AA0264750,TRIAE_CS42_2AL_TGACv1_094530_AA0299310,TRIAE_CS42_1BS_TGACv1_049369_AA0150920,TRIAE_CS42_1AS_TGACv1_018996_AA0057560,TRIAE_CS42_1DS_TGACv1_082083_AA0263760,TRIAE_CS42_7DL_TGACv1_603327_AA1981040,TRIAE_CS4…
GO:0004568	chitinase activity	molecular_function	1.8719e-08	8.3886e-06	14	2591	69	74606	TRIAE_CS42_3B_TGACv1_226118_AA0814050,TRIAE_CS42_3DL_TGACv1_251542_AA0882430,TRIAE_CS42_2BS_TGACv1_146201_AA0458680,TRIAE_CS42_2AL_TGACv1_094147_AA0293320,TRIAE_CS42_3DL_TGACv1_250209_AA0864280,TRIAE_CS42_2AL_TGACv1_096750_AA0321140,TRIAE_CS42_6DL_TGACv1_527923_AA1709960,TRIAE_CS42_U_TGACv1_642890_AA2124500,TRIAE_CS42_2BL_TGACv1_131533_AA0428910,TRIAE_CS42_3AS_TGACv1_211037_AA0683620,TRIAE_CS42_1…
GO:0006026	aminoglycan catabolic process	biological_process	1.8719e-08	8.3886e-06	14	2591	69	74606	TRIAE_CS42_2BL_TGACv1_131533_AA0428910,TRIAE_CS42_3AS_TGACv1_211037_AA0683620,TRIAE_CS42_1AL_TGACv1_003139_AA0048110,TRIAE_CS42_2DL_TGACv1_158075_AA0508060,TRIAE_CS42_2AL_TGACv1_094147_AA0293310,TRIAE_CS42_1DL_TGACv1_061306_AA0192040,TRIAE_CS42_3B_TGACv1_226118_AA0814050,TRIAE_CS42_2BS_TGACv1_146201_AA0458680,TRIAE_CS42_3DL_TGACv1_251542_AA0882430,TRIAE_CS42_2AL_TGACv1_094147_AA0293320,TRIAE_CS42…
GO:0006030	chitin metabolic process	biological_process	1.8719e-08	8.3886e-06	14	2591	69	74606	TRIAE_CS42_1AL_TGACv1_003139_AA0048110,TRIAE_CS42_3AS_TGACv1_211037_AA0683620,TRIAE_CS42_2BL_TGACv1_131533_AA0428910,TRIAE_CS42_1DL_TGACv1_061306_AA0192040,TRIAE_CS42_2AL_TGACv1_094147_AA0293310,TRIAE_CS42_2DL_TGACv1_158075_AA0508060,TRIAE_CS42_3B_TGACv1_226118_AA0814050,TRIAE_CS42_2BS_TGACv1_146201_AA0458680,TRIAE_CS42_3DL_TGACv1_251542_AA0882430,TRIAE_CS42_3DL_TGACv1_250209_AA0864280,TRIAE_CS42…
GO:0006032	chitin catabolic process	biological_process	1.8719e-08	8.3886e-06	14	2591	69	74606	TRIAE_CS42_1AL_TGACv1_003139_AA0048110,TRIAE_CS42_3AS_TGACv1_211037_AA0683620,TRIAE_CS42_2BL_TGACv1_131533_AA0428910,TRIAE_CS42_2AL_TGACv1_094147_AA0293310,TRIAE_CS42_1DL_TGACv1_061306_AA0192040,TRIAE_CS42_2DL_TGACv1_158075_AA0508060,TRIAE_CS42_2AL_TGACv1_096750_AA0321140,TRIAE_CS42_3DL_TGACv1_250209_AA0864280,TRIAE_CS42_2AL_TGACv1_094147_AA0293320,TRIAE_CS42_6DL_TGACv1_527923_AA1709960,TRIAE_CS4…
GO:0016998	cell wall macromolecule catabolic process	biological_process	1.8719e-08	8.3886e-06	14	2591	69	74606	TRIAE_CS42_3DL_TGACv1_250209_AA0864280,TRIAE_CS42_2AL_TGACv1_096750_AA0321140,TRIAE_CS42_2AL_TGACv1_094147_AA0293320,TRIAE_CS42_U_TGACv1_642890_AA2124500,TRIAE_CS42_6DL_TGACv1_527923_AA1709960,TRIAE_CS42_3B_TGACv1_226118_AA0814050,TRIAE_CS42_3DL_TGACv1_251542_AA0882430,TRIAE_CS42_2BS_TGACv1_146201_AA0458680,TRIAE_CS42_1AL_TGACv1_003139_AA0048110,TRIAE_CS42_3AS_TGACv1_211037_AA0683620,TRIAE_CS42_2…
GO:0046348	amino sugar catabolic process	biological_process	1.8719e-08	8.3886e-06	14	2591	69	74606	TRIAE_CS42_3B_TGACv1_226118_AA0814050,TRIAE_CS42_2BS_TGACv1_146201_AA0458680,TRIAE_CS42_3DL_TGACv1_251542_AA0882430,TRIAE_CS42_3DL_TGACv1_250209_AA0864280,TRIAE_CS42_2AL_TGACv1_096750_AA0321140,TRIAE_CS42_2AL_TGACv1_094147_AA0293320,TRIAE_CS42_U_TGACv1_642890_AA2124500,TRIAE_CS42_6DL_TGACv1_527923_AA1709960,TRIAE_CS42_3AS_TGACv1_211037_AA0683620,TRIAE_CS42_1AL_TGACv1_003139_AA0048110,TRIAE_CS42_2…
GO:1901072	glucosamine-containing compound catabolic process	biological_process	1.8719e-08	8.3886e-06	14	2591	69	74606	TRIAE_CS42_3B_TGACv1_226118_AA0814050,TRIAE_CS42_2BS_TGACv1_146201_AA0458680,TRIAE_CS42_3DL_TGACv1_251542_AA0882430,TRIAE_CS42_2AL_TGACv1_096750_AA0321140,TRIAE_CS42_3DL_TGACv1_250209_AA0864280,TRIAE_CS42_2AL_TGACv1_094147_AA0293320,TRIAE_CS42_6DL_TGACv1_527923_AA1709960,TRIAE_CS42_U_TGACv1_642890_AA2124500,TRIAE_CS42_1AL_TGACv1_003139_AA0048110,TRIAE_CS42_3AS_TGACv1_211037_AA0683620,TRIAE_CS42_2…
GO:0046620	regulation of organ growth	biological_process	2.4089e-08	1.012e-05	8	2591	20	74606	TRIAE_CS42_1DL_TGACv1_061536_AA0198180,TRIAE_CS42_2AL_TGACv1_094156_AA0293460,TRIAE_CS42_U_TGACv1_641037_AA2082910,TRIAE_CS42_2AL_TGACv1_095745_AA0314190,TRIAE_CS42_1AL_TGACv1_001774_AA0034980,TRIAE_CS42_3AL_TGACv1_198419_AA0668610,TRIAE_CS42_2BL_TGACv1_131186_AA0424110,TRIAE_CS42_3DL_TGACv1_253118_AA0893450
GO:0006022	aminoglycan metabolic process	biological_process	3.0539e-08	1.2075e-05	14	2591	71	74606	TRIAE_CS42_1DL_TGACv1_061306_AA0192040,TRIAE_CS42_2AL_TGACv1_094147_AA0293310,TRIAE_CS42_2DL_TGACv1_158075_AA0508060,TRIAE_CS42_1AL_TGACv1_003139_AA0048110,TRIAE_CS42_3AS_TGACv1_211037_AA0683620,TRIAE_CS42_2BL_TGACv1_131533_AA0428910,TRIAE_CS42_3DL_TGACv1_251542_AA0882430,TRIAE_CS42_2BS_TGACv1_146201_AA0458680,TRIAE_CS42_3B_TGACv1_226118_AA0814050,TRIAE_CS42_6DL_TGACv1_527923_AA1709960,TRIAE_CS42…
GO:1901071	glucosamine-containing compound metabolic process	biological_process	3.7365e-08	1.3954e-05	14	2591	72	74606	TRIAE_CS42_3DL_TGACv1_251542_AA0882430,TRIAE_CS42_2BS_TGACv1_146201_AA0458680,TRIAE_CS42_3B_TGACv1_226118_AA0814050,TRIAE_CS42_6DL_TGACv1_527923_AA1709960,TRIAE_CS42_U_TGACv1_642890_AA2124500,TRIAE_CS42_2AL_TGACv1_094147_AA0293320,TRIAE_CS42_2AL_TGACv1_096750_AA0321140,TRIAE_CS42_3DL_TGACv1_250209_AA0864280,TRIAE_CS42_2DL_TGACv1_158075_AA0508060,TRIAE_CS42_1DL_TGACv1_061306_AA0192040,TRIAE_CS42_2…
GO:0009607	response to biotic stimulus	biological_process	5.91e-08	2.0909e-05	42	2591	484	74606	TRIAE_CS42_U_TGACv1_646267_AA2146250,TRIAE_CS42_U_TGACv1_642227_AA2113800,TRIAE_CS42_7AL_TGACv1_557477_AA1781780,TRIAE_CS42_7DL_TGACv1_603396_AA1982740,TRIAE_CS42_1DS_TGACv1_082083_AA0263760,TRIAE_CS42_3AL_TGACv1_194123_AA0626970,TRIAE_CS42_4DL_TGACv1_345465_AA1153290,TRIAE_CS42_3DL_TGACv1_249716_AA0855170,TRIAE_CS42_U_TGACv1_641589_AA2098880,TRIAE_CS42_4DL_TGACv1_342886_AA1124660,TRIAE_CS42_3AL_…
GO:0048639	positive regulation of developmental growth	biological_process	7.6027e-08	2.5553e-05	7	2591	15	74606	TRIAE_CS42_U_TGACv1_641037_AA2082910,TRIAE_CS42_1DL_TGACv1_061536_AA0198180,TRIAE_CS42_2AL_TGACv1_094156_AA0293460,TRIAE_CS42_3AL_TGACv1_198419_AA0668610,TRIAE_CS42_1AL_TGACv1_001774_AA0034980,TRIAE_CS42_2BL_TGACv1_131186_AA0424110,TRIAE_CS42_3DL_TGACv1_253118_AA0893450
GO:0016758	transferase activity, transferring hexosyl groups	molecular_function	8.8228e-08	2.8241e-05	98	2591	1578	74606	TRIAE_CS42_5AL_TGACv1_377599_AA1248240,TRIAE_CS42_3DL_TGACv1_250949_AA0875320,TRIAE_CS42_6BS_TGACv1_513952_AA1652850,TRIAE_CS42_2DS_TGACv1_178795_AA0601130,TRIAE_CS42_5AL_TGACv1_375282_AA1219110,TRIAE_CS42_3B_TGACv1_221877_AA0752330,TRIAE_CS42_3DS_TGACv1_271859_AA0909590,TRIAE_CS42_7AS_TGACv1_570513_AA1836860,TRIAE_CS42_6BL_TGACv1_500231_AA1601800,TRIAE_CS42_6AS_TGACv1_487109_AA1568210,TRIAE_CS42…
GO:0044036	cell wall macromolecule metabolic process	biological_process	1.6755e-07	5.1194e-05	27	2591	266	74606	TRIAE_CS42_1AL_TGACv1_003139_AA0048110,TRIAE_CS42_7BL_TGACv1_576916_AA1859680,TRIAE_CS42_3AS_TGACv1_211037_AA0683620,TRIAE_CS42_7AL_TGACv1_556201_AA1757940,TRIAE_CS42_1DL_TGACv1_061306_AA0192040,TRIAE_CS42_2DL_TGACv1_158075_AA0508060,TRIAE_CS42_7BL_TGACv1_576920_AA1859840,TRIAE_CS42_2AL_TGACv1_096750_AA0321140,TRIAE_CS42_3DL_TGACv1_250998_AA0876050,TRIAE_CS42_6DL_TGACv1_527923_AA1709960,TRIAE_CS4…
GO:0004557	alpha-galactosidase activity	molecular_function	1.8587e-07	5.2059e-05	9	2591	26	74606	TRIAE_CS42_2BS_TGACv1_145886_AA0448110,TRIAE_CS42_1AL_TGACv1_001127_AA0025460,TRIAE_CS42_1BL_TGACv1_033598_AA0140580,TRIAE_CS42_2DS_TGACv1_179406_AA0606800,TRIAE_CS42_3B_TGACv1_220634_AA0712980,TRIAE_CS42_1DL_TGACv1_063732_AA0230310,TRIAE_CS42_3AS_TGACv1_211472_AA0690490,TRIAE_CS42_3DS_TGACv1_273808_AA0933540,TRIAE_CS42_U_TGACv1_641952_AA2108170
GO:0052692	raffinose alpha-galactosidase activity	molecular_function	1.8587e-07	5.2059e-05	9	2591	26	74606	TRIAE_CS42_3AS_TGACv1_211472_AA0690490,TRIAE_CS42_3DS_TGACv1_273808_AA0933540,TRIAE_CS42_U_TGACv1_641952_AA2108170,TRIAE_CS42_1AL_TGACv1_001127_AA0025460,TRIAE_CS42_2BS_TGACv1_145886_AA0448110,TRIAE_CS42_1BL_TGACv1_033598_AA0140580,TRIAE_CS42_3B_TGACv1_220634_AA0712980,TRIAE_CS42_2DS_TGACv1_179406_AA0606800,TRIAE_CS42_1DL_TGACv1_063732_AA0230310
GO:0072509	divalent inorganic cation transmembrane transporter activity	molecular_function	2.9391e-07	7.9026e-05	19	2591	127	74606	TRIAE_CS42_7DL_TGACv1_603327_AA1981040,TRIAE_CS42_5BL_TGACv1_406719_AA1349220,TRIAE_CS42_1BS_TGACv1_049369_AA0150920,TRIAE_CS42_2AL_TGACv1_094530_AA0299310,TRIAE_CS42_1DS_TGACv1_082535_AA0264750,TRIAE_CS42_5AL_TGACv1_376863_AA1241710,TRIAE_CS42_1AL_TGACv1_000915_AA0021770,TRIAE_CS42_2DL_TGACv1_159178_AA0533860,TRIAE_CS42_1AL_TGACv1_001862_AA0035990,TRIAE_CS42_2BL_TGACv1_129658_AA0391920,TRIAE_CS4…
GO:0006040	amino sugar metabolic process	biological_process	3.234e-07	8.361e-05	14	2591	83	74606	TRIAE_CS42_1DL_TGACv1_061306_AA0192040,TRIAE_CS42_2AL_TGACv1_094147_AA0293310,TRIAE_CS42_2DL_TGACv1_158075_AA0508060,TRIAE_CS42_3AS_TGACv1_211037_AA0683620,TRIAE_CS42_1AL_TGACv1_003139_AA0048110,TRIAE_CS42_2BL_TGACv1_131533_AA0428910,TRIAE_CS42_3DL_TGACv1_251542_AA0882430,TRIAE_CS42_2BS_TGACv1_146201_AA0458680,TRIAE_CS42_3B_TGACv1_226118_AA0814050,TRIAE_CS42_6DL_TGACv1_527923_AA1709960,TRIAE_CS42…
GO:1901565	organonitrogen compound catabolic process	biological_process	4.0569e-07	0.000101	30	2591	298	74606	TRIAE_CS42_3DL_TGACv1_251542_AA0882430,TRIAE_CS42_6AL_TGACv1_471406_AA1508300,TRIAE_CS42_4AL_TGACv1_290391_AA0984880,TRIAE_CS42_1BS_TGACv1_051029_AA0177320,TRIAE_CS42_U_TGACv1_642890_AA2124500,TRIAE_CS42_2DL_TGACv1_158333_AA0515890,TRIAE_CS42_2AL_TGACv1_094147_AA0293320,TRIAE_CS42_3DL_TGACv1_250209_AA0864280,TRIAE_CS42_1DS_TGACv1_080324_AA0245930,TRIAE_CS42_1AS_TGACv1_019041_AA0058700,TRIAE_CS42_…
GO:0070838	divalent metal ion transport	biological_process	6.2921e-07	0.00014585	19	2591	133	74606	TRIAE_CS42_1AL_TGACv1_001862_AA0035990,TRIAE_CS42_2DL_TGACv1_159178_AA0533860,TRIAE_CS42_1AL_TGACv1_000915_AA0021770,TRIAE_CS42_5AL_TGACv1_376863_AA1241710,TRIAE_CS42_1DS_TGACv1_082535_AA0264750,TRIAE_CS42_1BS_TGACv1_049369_AA0150920,TRIAE_CS42_2AL_TGACv1_094530_AA0299310,TRIAE_CS42_5BL_TGACv1_406719_AA1349220,TRIAE_CS42_7DL_TGACv1_603327_AA1981040,TRIAE_CS42_7BL_TGACv1_577920_AA1886220,TRIAE_CS4…
GO:0072511	divalent inorganic cation transport	biological_process	6.2921e-07	0.00014585	19	2591	133	74606	TRIAE_CS42_1AL_TGACv1_001862_AA0035990,TRIAE_CS42_2DL_TGACv1_159178_AA0533860,TRIAE_CS42_1AL_TGACv1_000915_AA0021770,TRIAE_CS42_1DS_TGACv1_082535_AA0264750,TRIAE_CS42_5AL_TGACv1_376863_AA1241710,TRIAE_CS42_5BL_TGACv1_406719_AA1349220,TRIAE_CS42_1BS_TGACv1_049369_AA0150920,TRIAE_CS42_2AL_TGACv1_094530_AA0299310,TRIAE_CS42_7DL_TGACv1_603327_AA1981040,TRIAE_CS42_7BL_TGACv1_577920_AA1886220,TRIAE_CS4…
GO:0009311	oligosaccharide metabolic process	biological_process	7.761e-07	0.0001739	20	2591	142	74606	TRIAE_CS42_7BS_TGACv1_591812_AA1922120,TRIAE_CS42_5BL_TGACv1_405389_AA1326200,TRIAE_CS42_3B_TGACv1_220634_AA0712980,TRIAE_CS42_4DL_TGACv1_345311_AA1152660,TRIAE_CS42_1AS_TGACv1_019739_AA0070830,TRIAE_CS42_3DS_TGACv1_273808_AA0933540,TRIAE_CS42_5DL_TGACv1_435162_AA1446920,TRIAE_CS42_3AS_TGACv1_211472_AA0690490,TRIAE_CS42_2DS_TGACv1_178535_AA0597240,TRIAE_CS42_4DL_TGACv1_343260_AA1132390,TRIAE_CS42…
GO:0035265	organ growth	biological_process	1.0938e-06	0.00023717	8	2591	28	74606	TRIAE_CS42_3AL_TGACv1_198419_AA0668610,TRIAE_CS42_2BL_TGACv1_131186_AA0424110,TRIAE_CS42_3DL_TGACv1_253118_AA0893450,TRIAE_CS42_1DL_TGACv1_061536_AA0198180,TRIAE_CS42_2AL_TGACv1_094156_AA0293460,TRIAE_CS42_U_TGACv1_641037_AA2082910,TRIAE_CS42_2AL_TGACv1_095745_AA0314190,TRIAE_CS42_1AL_TGACv1_001774_AA0034980
GO:0000041	transition metal ion transport	biological_process	2.1475e-06	0.00045111	15	2591	106	74606	TRIAE_CS42_7BL_TGACv1_577920_AA1886220,TRIAE_CS42_5DL_TGACv1_433809_AA1422730,TRIAE_CS42_U_TGACv1_641589_AA2098880,TRIAE_CS42_7AL_TGACv1_558847_AA1796430,TRIAE_CS42_1AL_TGACv1_000915_AA0021770,TRIAE_CS42_1DS_TGACv1_082535_AA0264750,TRIAE_CS42_7AL_TGACv1_558208_AA1791260,TRIAE_CS42_5DL_TGACv1_433022_AA1398550,TRIAE_CS42_1BS_TGACv1_049369_AA0150920,TRIAE_CS42_2AL_TGACv1_094530_AA0299310,TRIAE_CS42_…
GO:0043207	response to external biotic stimulus	biological_process	2.7e-06	0.0005338	34	2591	398	74606	TRIAE_CS42_3B_TGACv1_223506_AA0783140,TRIAE_CS42_2DL_TGACv1_157936_AA0502570,TRIAE_CS42_2DL_TGACv1_157957_AA0503480,TRIAE_CS42_2AL_TGACv1_094005_AA0291050,TRIAE_CS42_2BL_TGACv1_129454_AA0384580,TRIAE_CS42_1BS_TGACv1_050073_AA0167090,TRIAE_CS42_3B_TGACv1_221409_AA0740000,TRIAE_CS42_7DL_TGACv1_602991_AA1973350,TRIAE_CS42_3B_TGACv1_221115_AA0730720,TRIAE_CS42_7AS_TGACv1_569636_AA1820820,TRIAE_CS42_2…
GO:0051707	response to other organism	biological_process	2.7e-06	0.0005338	34	2591	398	74606	TRIAE_CS42_3AL_TGACv1_194123_AA0626970,TRIAE_CS42_1DS_TGACv1_082083_AA0263760,TRIAE_CS42_U_TGACv1_642227_AA2113800,TRIAE_CS42_7AL_TGACv1_557477_AA1781780,TRIAE_CS42_7DL_TGACv1_603396_AA1982740,TRIAE_CS42_3B_TGACv1_225295_AA0806840,TRIAE_CS42_U_TGACv1_643294_AA2130330,TRIAE_CS42_7DS_TGACv1_622199_AA2035080,TRIAE_CS42_3DL_TGACv1_249716_AA0855170,TRIAE_CS42_U_TGACv1_641589_AA2098880,TRIAE_CS42_1BL_T…
GO:0016157	sucrose synthase activity	molecular_function	3.7939e-06	0.00072864	9	2591	31	74606	TRIAE_CS42_4DL_TGACv1_345311_AA1152660,TRIAE_CS42_4AL_TGACv1_288793_AA0958320,TRIAE_CS42_7AS_TGACv1_570668_AA1839220,TRIAE_CS42_U_TGACv1_641879_AA2106520,TRIAE_CS42_7BS_TGACv1_591812_AA1922120,TRIAE_CS42_4BL_TGACv1_320515_AA1042030,TRIAE_CS42_4DL_TGACv1_345406_AA1153090,TRIAE_CS42_7AS_TGACv1_569135_AA1808380,TRIAE_CS42_5DL_TGACv1_432989_AA1397030
GO:0046915	transition metal ion transmembrane transporter activity	molecular_function	8.3774e-06	0.0015642	12	2591	76	74606	TRIAE_CS42_1BS_TGACv1_050073_AA0167090,TRIAE_CS42_2BL_TGACv1_129658_AA0391920,TRIAE_CS42_1DS_TGACv1_082083_AA0263760,TRIAE_CS42_7DL_TGACv1_603327_AA1981040,TRIAE_CS42_2AL_TGACv1_094530_AA0299310,TRIAE_CS42_1BS_TGACv1_049369_AA0150920,TRIAE_CS42_1AS_TGACv1_018996_AA0057560,TRIAE_CS42_7AL_TGACv1_558208_AA1791260,TRIAE_CS42_1DS_TGACv1_082535_AA0264750,TRIAE_CS42_7AL_TGACv1_558847_AA1796430,TRIAE_CS4…
GO:0009620	response to fungus	biological_process	9.0349e-06	0.0016376	18	2591	164	74606	TRIAE_CS42_2DL_TGACv1_157957_AA0503480,TRIAE_CS42_7AL_TGACv1_557477_AA1781780,TRIAE_CS42_3B_TGACv1_223506_AA0783140,TRIAE_CS42_2DL_TGACv1_157936_AA0502570,TRIAE_CS42_3AL_TGACv1_194123_AA0626970,TRIAE_CS42_7DL_TGACv1_602991_AA1973350,TRIAE_CS42_2BL_TGACv1_129454_AA0384580,TRIAE_CS42_U_TGACv1_640979_AA2081270,TRIAE_CS42_3AL_TGACv1_194149_AA0627480,TRIAE_CS42_2BS_TGACv1_146914_AA0475310,TRIAE_CS42_5…
GO:0005984	disaccharide metabolic process	biological_process	9.4766e-06	0.0016376	16	2591	112	74606	TRIAE_CS42_5BL_TGACv1_405389_AA1326200,TRIAE_CS42_7BS_TGACv1_591812_AA1922120,TRIAE_CS42_1AS_TGACv1_019739_AA0070830,TRIAE_CS42_4DL_TGACv1_345311_AA1152660,TRIAE_CS42_2DS_TGACv1_178535_AA0597240,TRIAE_CS42_5DL_TGACv1_435162_AA1446920,TRIAE_CS42_4DL_TGACv1_345406_AA1153090,TRIAE_CS42_1DL_TGACv1_061682_AA0201620,TRIAE_CS42_4BL_TGACv1_320515_AA1042030,TRIAE_CS42_4AL_TGACv1_288793_AA0958320,TRIAE_CS4…
GO:0045927	positive regulation of growth	biological_process	9.501e-06	0.0016376	7	2591	24	74606	TRIAE_CS42_U_TGACv1_641037_AA2082910,TRIAE_CS42_2AL_TGACv1_094156_AA0293460,TRIAE_CS42_1DL_TGACv1_061536_AA0198180,TRIAE_CS42_3AL_TGACv1_198419_AA0668610,TRIAE_CS42_1AL_TGACv1_001774_AA0034980,TRIAE_CS42_3DL_TGACv1_253118_AA0893450,TRIAE_CS42_2BL_TGACv1_131186_AA0424110
GO:0009266	response to temperature stimulus	biological_process	1.5339e-05	0.0025777	27	2591	304	74606	TRIAE_CS42_2AL_TGACv1_093114_AA0272280,TRIAE_CS42_6AL_TGACv1_472182_AA1518680,TRIAE_CS42_4BL_TGACv1_321796_AA1065580,TRIAE_CS42_3B_TGACv1_221115_AA0730720,TRIAE_CS42_6DS_TGACv1_542805_AA1730740,TRIAE_CS42_5DL_TGACv1_433267_AA1407610,TRIAE_CS42_7AS_TGACv1_570182_AA1831770,TRIAE_CS42_6DL_TGACv1_529086_AA1717390,TRIAE_CS42_6DL_TGACv1_528099_AA1711510,TRIAE_CS42_7BS_TGACv1_593428_AA1951470,TRIAE_CS42…
GO:0005985	sucrose metabolic process	biological_process	2.2941e-05	0.0037612	10	2591	48	74606	TRIAE_CS42_7BS_TGACv1_591812_AA1922120,TRIAE_CS42_4BL_TGACv1_320515_AA1042030,TRIAE_CS42_4DL_TGACv1_345311_AA1152660,TRIAE_CS42_4AL_TGACv1_288793_AA0958320,TRIAE_CS42_U_TGACv1_641879_AA2106520,TRIAE_CS42_1AS_TGACv1_019739_AA0070830,TRIAE_CS42_7AS_TGACv1_570668_AA1839220,TRIAE_CS42_5DL_TGACv1_432989_AA1397030,TRIAE_CS42_7AS_TGACv1_569135_AA1808380,TRIAE_CS42_4DL_TGACv1_345406_AA1153090
GO:0009605	response to external stimulus	biological_process	2.7079e-05	0.0043339	41	2591	565	74606	TRIAE_CS42_3DL_TGACv1_249716_AA0855170,TRIAE_CS42_3AL_TGACv1_194149_AA0627480,TRIAE_CS42_U_TGACv1_640979_AA2081270,TRIAE_CS42_1BL_TGACv1_032923_AA0135480,TRIAE_CS42_1DS_TGACv1_081316_AA0259820,TRIAE_CS42_U_TGACv1_641589_AA2098880,TRIAE_CS42_7DS_TGACv1_622199_AA2035080,TRIAE_CS42_U_TGACv1_643294_AA2130330,TRIAE_CS42_3B_TGACv1_225295_AA0806840,TRIAE_CS42_U_TGACv1_642227_AA2113800,TRIAE_CS42_4AL_TGA…
GO:0003674	molecular_function	molecular_function	2.9803e-05	0.0045692	2216	2591	60525	74606	TRIAE_CS42_6DL_TGACv1_529705_AA1718750,TRIAE_CS42_4AL_TGACv1_290539_AA0986440,TRIAE_CS42_2DL_TGACv1_159551_AA0539660,TRIAE_CS42_6DL_TGACv1_529086_AA1717390,TRIAE_CS42_1BL_TGACv1_030527_AA0093230,TRIAE_CS42_3AS_TGACv1_210630_AA0675980,TRIAE_CS42_U_TGACv1_640731_AA2071470,TRIAE_CS42_2DL_TGACv1_162760_AA0563530,TRIAE_CS42_1BS_TGACv1_050247_AA0169640,TRIAE_CS42_5DL_TGACv1_434439_AA1436040,TRIAE_CS42_…
IAE_CS42_2AS_TGACv1_114668_AA0368720,TRIAE_CS42_1DL_TGACv1_061976_AA0206730,TRIAE_CS42_7AL_TGACv1_556451_AA1763190,TRIAE_CS42_5DS_TGACv1_456986_AA1480690,TRIAE_CS42_4BL_TGACv1_321069_AA1054650,TRIAE_CS42_5AS_TGACv1_393587_AA1274200,TRIAE_CS42_6DL_TGACv1_528127_AA1711800,TRIAE_CS42_2BL_TGACv1_133346_AA0442250,TRIAE_CS42_2DL_TGACv1_162040_AA0561630,TRIAE_CS42_U_TGACv1_642561_AA2119680,TRIAE_CS42_1B…
CS42_7AS_TGACv1_570416_AA1835420,TRIAE_CS42_3B_TGACv1_223259_AA0779220,TRIAE_CS42_1AL_TGACv1_000269_AA0007840,TRIAE_CS42_U_TGACv1_640695_AA2068970,TRIAE_CS42_5AL_TGACv1_374542_AA1202810,TRIAE_CS42_5DL_TGACv1_434476_AA1436680,TRIAE_CS42_2DL_TGACv1_159636_AA0540790,TRIAE_CS42_1DL_TGACv1_061194_AA0188420,TRIAE_CS42_4BL_TGACv1_322141_AA1068880,TRIAE_CS42_2DS_TGACv1_177376_AA0575090,TRIAE_CS42_6BL_TGA…
GO:1901136	carbohydrate derivative catabolic process	biological_process	2.9908e-05	0.0045692	14	2591	114	74606	TRIAE_CS42_3B_TGACv1_226118_AA0814050,TRIAE_CS42_3DL_TGACv1_251542_AA0882430,TRIAE_CS42_2BS_TGACv1_146201_AA0458680,TRIAE_CS42_2AL_TGACv1_096750_AA0321140,TRIAE_CS42_3DL_TGACv1_250209_AA0864280,TRIAE_CS42_2AL_TGACv1_094147_AA0293320,TRIAE_CS42_6DL_TGACv1_527923_AA1709960,TRIAE_CS42_U_TGACv1_642890_AA2124500,TRIAE_CS42_3AS_TGACv1_211037_AA0683620,TRIAE_CS42_1AL_TGACv1_003139_AA0048110,TRIAE_CS42_2…
GO:0004867	serine-type endopeptidase inhibitor activity	molecular_function	3.4051e-05	0.0048977	15	2591	181	74606	TRIAE_CS42_3B_TGACv1_220723_AA0716830,TRIAE_CS42_1AS_TGACv1_020713_AA0079380,TRIAE_CS42_3AS_TGACv1_212619_AA0702120,TRIAE_CS42_3AS_TGACv1_212619_AA0702130,TRIAE_CS42_1AL_TGACv1_000490_AA0013370,TRIAE_CS42_1BS_TGACv1_050120_AA0167650,TRIAE_CS42_U_TGACv1_643301_AA2130450,TRIAE_CS42_1AS_TGACv1_019165_AA0061960,TRIAE_CS42_1AS_TGACv1_019165_AA0061930,TRIAE_CS42_3B_TGACv1_220651_AA0713900,TRIAE_CS42_3A…
GO:0006558	L-phenylalanine metabolic process	biological_process	3.457e-05	0.0048977	12	2591	77	74606	TRIAE_CS42_6AL_TGACv1_471406_AA1508300,TRIAE_CS42_2DL_TGACv1_158972_AA0529690,TRIAE_CS42_1BS_TGACv1_051029_AA0177320,TRIAE_CS42_4AL_TGACv1_290391_AA0984880,TRIAE_CS42_2AL_TGACv1_093194_AA0274680,TRIAE_CS42_2DL_TGACv1_158333_AA0515890,TRIAE_CS42_2BL_TGACv1_129516_AA0386790,TRIAE_CS42_2BL_TGACv1_131086_AA0422270,TRIAE_CS42_1DS_TGACv1_080107_AA0239340,TRIAE_CS42_2BL_TGACv1_132120_AA0435430,TRIAE_CS4…
GO:1902221	erythrose 4-phosphate/phosphoenolpyruvate family amino acid metabolic process	biological_process	3.457e-05	0.0048977	12	2591	77	74606	TRIAE_CS42_2BL_TGACv1_132120_AA0435430,TRIAE_CS42_1AS_TGACv1_019041_AA0058700,TRIAE_CS42_5BL_TGACv1_408228_AA1362390,TRIAE_CS42_2DL_TGACv1_158972_AA0529690,TRIAE_CS42_6AL_TGACv1_471406_AA1508300,TRIAE_CS42_2AL_TGACv1_093194_AA0274680,TRIAE_CS42_4AL_TGACv1_290391_AA0984880,TRIAE_CS42_1BS_TGACv1_051029_AA0177320,TRIAE_CS42_2BL_TGACv1_129516_AA0386790,TRIAE_CS42_2DL_TGACv1_158333_AA0515890,TRIAE_CS4…
GO:0019135	deoxyhypusine monooxygenase activity	molecular_function	3.4973e-05	0.0048977	3	2591	3	74606	TRIAE_CS42_6AL_TGACv1_472548_AA1523440,TRIAE_CS42_U_TGACv1_642459_AA2117930,TRIAE_CS42_6DL_TGACv1_526960_AA1696120
GO:0098542	defense response to other organism	biological_process	5.7151e-05	0.0078402	27	2591	334	74606	TRIAE_CS42_3DL_TGACv1_249884_AA0858100,TRIAE_CS42_5AL_TGACv1_375873_AA1228260,TRIAE_CS42_1DL_TGACv1_063179_AA0224700,TRIAE_CS42_3B_TGACv1_225295_AA0806840,TRIAE_CS42_3DL_TGACv1_249320_AA0845360,TRIAE_CS42_U_TGACv1_643294_AA2130330,TRIAE_CS42_3AL_TGACv1_193848_AA0620880,TRIAE_CS42_3AL_TGACv1_194067_AA0625780,TRIAE_CS42_7DS_TGACv1_622199_AA2035080,TRIAE_CS42_3B_TGACv1_221115_AA0730720,TRIAE_CS42_5A…
GO:0033530	raffinose metabolic process	biological_process	7.2104e-05	0.0095036	3	2591	3	74606	TRIAE_CS42_3B_TGACv1_220634_AA0712980,TRIAE_CS42_3DS_TGACv1_273808_AA0933540,TRIAE_CS42_3AS_TGACv1_211472_AA0690490
GO:0034484	raffinose catabolic process	biological_process	7.2104e-05	0.0095036	3	2591	3	74606	TRIAE_CS42_3DS_TGACv1_273808_AA0933540,TRIAE_CS42_3AS_TGACv1_211472_AA0690490,TRIAE_CS42_3B_TGACv1_220634_AA0712980
GO:0008470	isovaleryl-CoA dehydrogenase activity	molecular_function	7.9477e-05	0.010198	3	2591	3	74606	TRIAE_CS42_1DS_TGACv1_080324_AA0245930,TRIAE_CS42_1BS_TGACv1_049760_AA0160990,TRIAE_CS42_1AS_TGACv1_019383_AA0065910
GO:0016757	transferase activity, transferring glycosyl groups	molecular_function	8.0407e-05	0.010198	112	2591	2136	74606	TRIAE_CS42_3DL_TGACv1_251733_AA0884370,TRIAE_CS42_4DL_TGACv1_346127_AA1155180,TRIAE_CS42_7AL_TGACv1_556597_AA1766630,TRIAE_CS42_7AL_TGACv1_559593_AA1800230,TRIAE_CS42_4BS_TGACv1_328000_AA1080870,TRIAE_CS42_7DL_TGACv1_602694_AA1965505,TRIAE_CS42_5AL_TGACv1_376019_AA1230850,TRIAE_CS42_7AL_TGACv1_556201_AA1757940,TRIAE_CS42_6AL_TGACv1_471748_AA1513690,TRIAE_CS42_1AL_TGACv1_000398_AA0011150,TRIAE_CS4…
GO:0009916	alternative oxidase activity	molecular_function	8.582e-05	0.010683	5	2591	15	74606	TRIAE_CS42_2AL_TGACv1_093545_AA0282360,TRIAE_CS42_6DL_TGACv1_528632_AA1715280,TRIAE_CS42_2BL_TGACv1_132767_AA0439680,TRIAE_CS42_2AL_TGACv1_093624_AA0283900,TRIAE_CS42_2DL_TGACv1_159044_AA0531270
GO:1900864	mitochondrial RNA modification	biological_process	9.3874e-05	0.011473	8	2591	37	74606	TRIAE_CS42_6AL_TGACv1_471931_AA1515970,TRIAE_CS42_5AL_TGACv1_375845_AA1228000,TRIAE_CS42_5AL_TGACv1_376824_AA1241280,TRIAE_CS42_7AL_TGACv1_558513_AA1793880,TRIAE_CS42_7AS_TGACv1_569178_AA1809270,TRIAE_CS42_3DL_TGACv1_249364_AA0846670,TRIAE_CS42_5BL_TGACv1_406740_AA1349460,TRIAE_CS42_5DL_TGACv1_435535_AA1451770
GO:0048584	positive regulation of response to stimulus	biological_process	0.0001115	0.013384	18	2591	183	74606	TRIAE_CS42_3AL_TGACv1_193848_AA0620880,TRIAE_CS42_3B_TGACv1_225295_AA0806840,TRIAE_CS42_1DL_TGACv1_063179_AA0224700,TRIAE_CS42_3DL_TGACv1_249320_AA0845360,TRIAE_CS42_3DL_TGACv1_249884_AA0858100,TRIAE_CS42_1BL_TGACv1_032923_AA0135480,TRIAE_CS42_3AL_TGACv1_194149_AA0627480,TRIAE_CS42_U_TGACv1_644029_AA2136590,TRIAE_CS42_3DL_TGACv1_249716_AA0855170,TRIAE_CS42_4AL_TGACv1_292230_AA0998160,TRIAE_CS42_3…
GO:0033743	peptide-methionine (R)-S-oxide reductase activity	molecular_function	0.00011469	0.013525	4	2591	11	74606	TRIAE_CS42_U_TGACv1_643698_AA2134360,TRIAE_CS42_4DL_TGACv1_342927_AA1125480,TRIAE_CS42_5AL_TGACv1_380108_AA1257250,TRIAE_CS42_6BL_TGACv1_499751_AA1591020
GO:0002684	positive regulation of immune system process	biological_process	0.00014914	0.016709	8	2591	43	74606	TRIAE_CS42_3DL_TGACv1_249716_AA0855170,TRIAE_CS42_7AL_TGACv1_557477_AA1781780,TRIAE_CS42_1BL_TGACv1_032923_AA0135480,TRIAE_CS42_1DL_TGACv1_063179_AA0224700,TRIAE_CS42_3B_TGACv1_225295_AA0806840,TRIAE_CS42_7DL_TGACv1_602991_AA1973350,TRIAE_CS42_3AL_TGACv1_193848_AA0620880,TRIAE_CS42_3B_TGACv1_221409_AA0740000
GO:0045089	positive regulation of innate immune response	biological_process	0.00014914	0.016709	8	2591	43	74606	TRIAE_CS42_3B_TGACv1_221409_AA0740000,TRIAE_CS42_7DL_TGACv1_602991_AA1973350,TRIAE_CS42_3AL_TGACv1_193848_AA0620880,TRIAE_CS42_1DL_TGACv1_063179_AA0224700,TRIAE_CS42_3B_TGACv1_225295_AA0806840,TRIAE_CS42_3DL_TGACv1_249716_AA0855170,TRIAE_CS42_1BL_TGACv1_032923_AA0135480,TRIAE_CS42_7AL_TGACv1_557477_AA1781780
GO:0050778	positive regulation of immune response	biological_process	0.00014914	0.016709	8	2591	43	74606	TRIAE_CS42_1DL_TGACv1_063179_AA0224700,TRIAE_CS42_3B_TGACv1_225295_AA0806840,TRIAE_CS42_3B_TGACv1_221409_AA0740000,TRIAE_CS42_7DL_TGACv1_602991_AA1973350,TRIAE_CS42_3AL_TGACv1_193848_AA0620880,TRIAE_CS42_3DL_TGACv1_249716_AA0855170,TRIAE_CS42_7AL_TGACv1_557477_AA1781780,TRIAE_CS42_1BL_TGACv1_032923_AA0135480
GO:0004842	ubiquitin-protein transferase activity	molecular_function	0.0001671	0.017743	32	2591	422	74606	TRIAE_CS42_6BL_TGACv1_503490_AA1628010,TRIAE_CS42_1DL_TGACv1_061298_AA0191700,TRIAE_CS42_5AL_TGACv1_375017_AA1214080,TRIAE_CS42_4DL_TGACv1_343500_AA1135460,TRIAE_CS42_1AL_TGACv1_000232_AA0006790,TRIAE_CS42_U_TGACv1_641214_AA2088490,TRIAE_CS42_2DL_TGACv1_159175_AA0533810,TRIAE_CS42_2AL_TGACv1_094478_AA0298490,TRIAE_CS42_2DS_TGACv1_177342_AA0574110,TRIAE_CS42_5AL_TGACv1_374542_AA1202810,TRIAE_CS42_…
GO:0004553	hydrolase activity, hydrolyzing O-glycosyl compounds	molecular_function	0.00016875	0.017743	75	2591	1349	74606	TRIAE_CS42_1BL_TGACv1_033598_AA0140580,TRIAE_CS42_2AL_TGACv1_093560_AA0282590,TRIAE_CS42_4BL_TGACv1_320360_AA1036720,TRIAE_CS42_1AL_TGACv1_001127_AA0025460,TRIAE_CS42_7DL_TGACv1_603128_AA1976400,TRIAE_CS42_7BS_TGACv1_591794_AA1921480,TRIAE_CS42_3B_TGACv1_220634_AA0712980,TRIAE_CS42_2AL_TGACv1_096750_AA0321140,TRIAE_CS42_3AS_TGACv1_211472_AA0690490,TRIAE_CS42_2AL_TGACv1_096965_AA0322330,TRIAE_CS42…
GO:0009644	response to high light intensity	biological_process	0.00016967	0.017743	8	2591	52	74606	TRIAE_CS42_6DS_TGACv1_542805_AA1730740,TRIAE_CS42_2BL_TGACv1_130407_AA0410710,TRIAE_CS42_2DL_TGACv1_159376_AA0537420,TRIAE_CS42_4DL_TGACv1_343907_AA1141350,TRIAE_CS42_U_TGACv1_643016_AA2126240,TRIAE_CS42_4BS_TGACv1_329487_AA1101840,TRIAE_CS42_4AS_TGACv1_307652_AA1022370,TRIAE_CS42_4DL_TGACv1_343575_AA1136840
GO:0031347	regulation of defense response	biological_process	0.00017049	0.017743	14	2591	128	74606	TRIAE_CS42_3DL_TGACv1_249884_AA0858100,TRIAE_CS42_3B_TGACv1_221409_AA0740000,TRIAE_CS42_7DL_TGACv1_602991_AA1973350,TRIAE_CS42_3AL_TGACv1_194123_AA0626970,TRIAE_CS42_3AL_TGACv1_193848_AA0620880,TRIAE_CS42_1DL_TGACv1_063179_AA0224700,TRIAE_CS42_3B_TGACv1_225295_AA0806840,TRIAE_CS42_3DL_TGACv1_249320_AA0845360,TRIAE_CS42_5AL_TGACv1_373966_AA1185650,TRIAE_CS42_3DL_TGACv1_249716_AA0855170,TRIAE_CS42_…
GO:0019787	ubiquitin-like protein transferase activity	molecular_function	0.00017157	0.017743	33	2591	443	74606	TRIAE_CS42_5DL_TGACv1_433941_AA1425810,TRIAE_CS42_7AL_TGACv1_556687_AA1768840,TRIAE_CS42_5AL_TGACv1_374542_AA1202810,TRIAE_CS42_2AL_TGACv1_094478_AA0298490,TRIAE_CS42_2DL_TGACv1_159175_AA0533810,TRIAE_CS42_2DS_TGACv1_177342_AA0574110,TRIAE_CS42_U_TGACv1_641214_AA2088490,TRIAE_CS42_5AL_TGACv1_378109_AA1251260,TRIAE_CS42_1AL_TGACv1_000232_AA0006790,TRIAE_CS42_4DL_TGACv1_343500_AA1135460,TRIAE_CS42_…
GO:0004364	glutathione transferase activity	molecular_function	0.00019376	0.019735	5	2591	20	74606	TRIAE_CS42_6AS_TGACv1_486348_AA1560130,TRIAE_CS42_4AL_TGACv1_288539_AA0951460,TRIAE_CS42_1DS_TGACv1_080417_AA0247580,TRIAE_CS42_1DL_TGACv1_061935_AA0205830,TRIAE_CS42_1DS_TGACv1_080472_AA0248650
GO:0050832	defense response to fungus	biological_process	0.00022168	0.021938	14	2591	141	74606	TRIAE_CS42_7DS_TGACv1_622199_AA2035080,TRIAE_CS42_3AL_TGACv1_194123_AA0626970,TRIAE_CS42_7DL_TGACv1_602991_AA1973350,TRIAE_CS42_3AL_TGACv1_194067_AA0625780,TRIAE_CS42_U_TGACv1_643294_AA2130330,TRIAE_CS42_3DL_TGACv1_249320_AA0845360,TRIAE_CS42_2BL_TGACv1_129454_AA0384580,TRIAE_CS42_3DL_TGACv1_249884_AA0858100,TRIAE_CS42_U_TGACv1_640979_AA2081270,TRIAE_CS42_3AL_TGACv1_194149_AA0627480,TRIAE_CS42_2D…
GO:0042542	response to hydrogen peroxide	biological_process	0.00022193	0.021938	6	2591	27	74606	TRIAE_CS42_6DS_TGACv1_542805_AA1730740,TRIAE_CS42_U_TGACv1_643016_AA2126240,TRIAE_CS42_4BS_TGACv1_329487_AA1101840,TRIAE_CS42_4DL_TGACv1_343907_AA1141350,TRIAE_CS42_4AS_TGACv1_307652_AA1022370,TRIAE_CS42_4DL_TGACv1_343575_AA1136840
GO:0046873	metal ion transmembrane transporter activity	molecular_function	0.00027439	0.026731	30	2591	392	74606	TRIAE_CS42_3AL_TGACv1_193653_AA0616330,TRIAE_CS42_7AL_TGACv1_558847_AA1796430,TRIAE_CS42_5DL_TGACv1_434439_AA1436060,TRIAE_CS42_7BL_TGACv1_577920_AA1886220,TRIAE_CS42_5AL_TGACv1_374155_AA1191930,TRIAE_CS42_5AL_TGACv1_377746_AA1249180,TRIAE_CS42_1DS_TGACv1_082083_AA0263760,TRIAE_CS42_1DL_TGACv1_061321_AA0192370,TRIAE_CS42_2BL_TGACv1_129658_AA0391920,TRIAE_CS42_1BS_TGACv1_050073_AA0167090,TRIAE_CS4…
GO:0015925	galactosidase activity	molecular_function	0.00029058	0.02776	10	2591	66	74606	TRIAE_CS42_7AS_TGACv1_569973_AA1827990,TRIAE_CS42_U_TGACv1_641952_AA2108170,TRIAE_CS42_3DS_TGACv1_273808_AA0933540,TRIAE_CS42_3AS_TGACv1_211472_AA0690490,TRIAE_CS42_1DL_TGACv1_063732_AA0230310,TRIAE_CS42_2DS_TGACv1_179406_AA0606800,TRIAE_CS42_3B_TGACv1_220634_AA0712980,TRIAE_CS42_1BL_TGACv1_033598_AA0140580,TRIAE_CS42_2BS_TGACv1_145886_AA0448110,TRIAE_CS42_1AL_TGACv1_001127_AA0025460
GO:0043167	ion binding	molecular_function	0.00029321	0.02776	851	2591	20501	74606	TRIAE_CS42_U_TGACv1_644701_AA2141240,TRIAE_CS42_2DL_TGACv1_157936_AA0502570,TRIAE_CS42_3DS_TGACv1_271619_AA0904070,TRIAE_CS42_5DL_TGACv1_435570_AA1452160,TRIAE_CS42_1BL_TGACv1_032156_AA0126110,TRIAE_CS42_1DL_TGACv1_061136_AA0186520,TRIAE_CS42_4AL_TGACv1_288582_AA0952770,TRIAE_CS42_7DS_TGACv1_622006_AA2031000,TRIAE_CS42_U_TGACv1_644157_AA2137680,TRIAE_CS42_6DS_TGACv1_543704_AA1743270,TRIAE_CS42_5A…
ACv1_423460_AA1377250,TRIAE_CS42_3AL_TGACv1_195331_AA0648130,TRIAE_CS42_2AL_TGACv1_093545_AA0282360,TRIAE_CS42_2AL_TGACv1_094920_AA0304840,TRIAE_CS42_4AL_TGACv1_290622_AA0987530,TRIAE_CS42_1AS_TGACv1_019383_AA0065910,TRIAE_CS42_3DS_TGACv1_273438_AA0931210
GO:0051082	unfolded protein binding	molecular_function	0.0003445	0.031029	16	2591	165	74606	TRIAE_CS42_4BL_TGACv1_320724_AA1047170,TRIAE_CS42_4DL_TGACv1_343485_AA1135140,TRIAE_CS42_2BS_TGACv1_146201_AA0458690,TRIAE_CS42_3B_TGACv1_221409_AA0740000,TRIAE_CS42_5BL_TGACv1_407726_AA1359190,TRIAE_CS42_6BL_TGACv1_500696_AA1608510,TRIAE_CS42_5DL_TGACv1_436908_AA1464030,TRIAE_CS42_5DL_TGACv1_433267_AA1407610,TRIAE_CS42_1AL_TGACv1_003472_AA0049980,TRIAE_CS42_3DL_TGACv1_249716_AA0855170,TRIAE_CS42…
GO:0009800	cinnamic acid biosynthetic process	biological_process	0.0003462	0.031029	8	2591	44	74606	TRIAE_CS42_5BL_TGACv1_408228_AA1362390,TRIAE_CS42_1AS_TGACv1_019041_AA0058700,TRIAE_CS42_2BL_TGACv1_132120_AA0435430,TRIAE_CS42_1DS_TGACv1_080107_AA0239340,TRIAE_CS42_2DL_TGACv1_158333_AA0515890,TRIAE_CS42_1BS_TGACv1_051029_AA0177320,TRIAE_CS42_4AL_TGACv1_290391_AA0984880,TRIAE_CS42_6AL_TGACv1_471406_AA1508300
GO:0009803	cinnamic acid metabolic process	biological_process	0.0003462	0.031029	8	2591	44	74606	TRIAE_CS42_6AL_TGACv1_471406_AA1508300,TRIAE_CS42_1BS_TGACv1_051029_AA0177320,TRIAE_CS42_4AL_TGACv1_290391_AA0984880,TRIAE_CS42_2DL_TGACv1_158333_AA0515890,TRIAE_CS42_1DS_TGACv1_080107_AA0239340,TRIAE_CS42_2BL_TGACv1_132120_AA0435430,TRIAE_CS42_1AS_TGACv1_019041_AA0058700,TRIAE_CS42_5BL_TGACv1_408228_AA1362390
GO:0045548	phenylalanine ammonia-lyase activity	molecular_function	0.0003462	0.031029	8	2591	44	74606	TRIAE_CS42_2BL_TGACv1_132120_AA0435430,TRIAE_CS42_1AS_TGACv1_019041_AA0058700,TRIAE_CS42_5BL_TGACv1_408228_AA1362390,TRIAE_CS42_6AL_TGACv1_471406_AA1508300,TRIAE_CS42_4AL_TGACv1_290391_AA0984880,TRIAE_CS42_1BS_TGACv1_051029_AA0177320,TRIAE_CS42_2DL_TGACv1_158333_AA0515890,TRIAE_CS42_1DS_TGACv1_080107_AA0239340
GO:0006468	protein phosphorylation	biological_process	0.00039171	0.034646	247	2591	5061	74606	TRIAE_CS42_4BS_TGACv1_328534_AA1089730,TRIAE_CS42_7AS_TGACv1_571753_AA1849680,TRIAE_CS42_3B_TGACv1_226513_AA0817410,TRIAE_CS42_7AL_TGACv1_557989_AA1788740,TRIAE_CS42_7AS_TGACv1_569192_AA1809760,TRIAE_CS42_7DS_TGACv1_621682_AA2023110,TRIAE_CS42_6AL_TGACv1_471642_AA1512160,TRIAE_CS42_5BL_TGACv1_405520_AA1329370,TRIAE_CS42_5DS_TGACv1_456548_AA1473890,TRIAE_CS42_4DS_TGACv1_361499_AA1169130,TRIAE_CS42…
GO:0030001	metal ion transport	biological_process	0.00040818	0.035633	43	2591	710	74606	TRIAE_CS42_1AL_TGACv1_000915_AA0021770,TRIAE_CS42_U_TGACv1_641589_AA2098880,TRIAE_CS42_5BL_TGACv1_407556_AA1357920,TRIAE_CS42_5DL_TGACv1_433809_AA1422730,TRIAE_CS42_2AL_TGACv1_093911_AA0289230,TRIAE_CS42_7AL_TGACv1_556032_AA1753160,TRIAE_CS42_1BS_TGACv1_049369_AA0150920,TRIAE_CS42_1BL_TGACv1_030804_AA0101150,TRIAE_CS42_2AL_TGACv1_094530_AA0299310,TRIAE_CS42_3B_TGACv1_224046_AA0791510,TRIAE_CS42_5…
GO:0001071	nucleic acid binding transcription factor activity	molecular_function	0.00045487	0.038704	81	2591	1718	74606	TRIAE_CS42_2DL_TGACv1_157931_AA0502380,TRIAE_CS42_1DL_TGACv1_061081_AA0184380,TRIAE_CS42_7AS_TGACv1_571526_AA1848340,TRIAE_CS42_2BL_TGACv1_129714_AA0393610,TRIAE_CS42_2AL_TGACv1_094886_AA0304600,TRIAE_CS42_1DL_TGACv1_061880_AA0205230,TRIAE_CS42_3AS_TGACv1_210485_AA0673140,TRIAE_CS42_5AL_TGACv1_374180_AA1192590,TRIAE_CS42_5DL_TGACv1_433155_AA1403860,TRIAE_CS42_5DL_TGACv1_433055_AA1399940,TRIAE_CS4…
GO:0003700	transcription factor activity, sequence-specific DNA binding	molecular_function	0.00045487	0.038704	81	2591	1718	74606	TRIAE_CS42_6BS_TGACv1_513373_AA1639310,TRIAE_CS42_2BS_TGACv1_147553_AA0484820,TRIAE_CS42_1AL_TGACv1_002863_AA0045650,TRIAE_CS42_1DL_TGACv1_061710_AA0202080,TRIAE_CS42_6DS_TGACv1_542710_AA1728460,TRIAE_CS42_6DL_TGACv1_527768_AA1708370,TRIAE_CS42_1BL_TGACv1_031677_AA0118600,TRIAE_CS42_3DS_TGACv1_271605_AA0903480,TRIAE_CS42_1AL_TGACv1_002863_AA0045640,TRIAE_CS42_1BL_TGACv1_033328_AA0138790,TRIAE_CS4…
GO:0006751	glutathione catabolic process	biological_process	0.00048159	0.039966	5	2591	19	74606	TRIAE_CS42_2BL_TGACv1_129468_AA0385020,TRIAE_CS42_U_TGACv1_645945_AA2145750,TRIAE_CS42_6BL_TGACv1_499406_AA1581680,TRIAE_CS42_6BS_TGACv1_515352_AA1669520,TRIAE_CS42_6AS_TGACv1_485230_AA1540950
GO:0043171	peptide catabolic process	biological_process	0.00048159	0.039966	5	2591	19	74606	TRIAE_CS42_6AS_TGACv1_485230_AA1540950,TRIAE_CS42_6BL_TGACv1_499406_AA1581680,TRIAE_CS42_6BS_TGACv1_515352_AA1669520,TRIAE_CS42_U_TGACv1_645945_AA2145750,TRIAE_CS42_2BL_TGACv1_129468_AA0385020
GO:0009072	aromatic amino acid family metabolic process	biological_process	0.00048793	0.039998	18	2591	211	74606	TRIAE_CS42_4BL_TGACv1_320323_AA1035150,TRIAE_CS42_6AL_TGACv1_471406_AA1508300,TRIAE_CS42_2AL_TGACv1_093194_AA0274680,TRIAE_CS42_1BS_TGACv1_051029_AA0177320,TRIAE_CS42_4AL_TGACv1_290391_AA0984880,TRIAE_CS42_2DL_TGACv1_158333_AA0515890,TRIAE_CS42_5DL_TGACv1_435087_AA1445800,TRIAE_CS42_5AL_TGACv1_374079_AA1189780,TRIAE_CS42_1AS_TGACv1_019041_AA0058700,TRIAE_CS42_5BL_TGACv1_408228_AA1362390,TRIAE_CS4…
GO:0003993	acid phosphatase activity	molecular_function	0.00057751	0.046771	12	2591	111	74606	TRIAE_CS42_7AS_TGACv1_570936_AA1842670,TRIAE_CS42_5DL_TGACv1_434426_AA1435740,TRIAE_CS42_5BL_TGACv1_405255_AA1323340,TRIAE_CS42_4BL_TGACv1_320374_AA1037110,TRIAE_CS42_5AL_TGACv1_374648_AA1205550,TRIAE_CS42_5BL_TGACv1_405255_AA1323370,TRIAE_CS42_2DL_TGACv1_158862_AA0527400,TRIAE_CS42_5AL_TGACv1_375439_AA1221600,TRIAE_CS42_4AL_TGACv1_288766_AA0957540,TRIAE_CS42_7DS_TGACv1_623041_AA2048970,TRIAE_CS4…
GO:0022625	cytosolic large ribosomal subunit	cellular_component	0.00058791	0.047047	4	2591	15	74606	TRIAE_CS42_7AS_TGACv1_571059_AA1844040,TRIAE_CS42_5AS_TGACv1_394381_AA1279890,TRIAE_CS42_5DS_TGACv1_457616_AA1488190,TRIAE_CS42_5BS_TGACv1_423182_AA1369580
GO:0031349	positive regulation of defense response	biological_process	0.00060722	0.048021	8	2591	52	74606	TRIAE_CS42_3DL_TGACv1_249716_AA0855170,TRIAE_CS42_1BL_TGACv1_032923_AA0135480,TRIAE_CS42_7AL_TGACv1_557477_AA1781780,TRIAE_CS42_7DL_TGACv1_602991_AA1973350,TRIAE_CS42_3AL_TGACv1_193848_AA0620880,TRIAE_CS42_3B_TGACv1_221409_AA0740000,TRIAE_CS42_1DL_TGACv1_063179_AA0224700,TRIAE_CS42_3B_TGACv1_225295_AA0806840
