# Supplementary material for: Impact of Heat Stress on Expression of Wheat Genes Responsive to Hessian Fly Infestation
Source: Plants (Basel). 2022 May 25;11(11):1402. doi: 10.3390/plants11111402 (PMC9183101; doi:10.3390/plants11111402)
Supplement: Supplementary file 1 [file plants-11-01402-s001.zip › Table S4.xlsx]

## Sheet: Table S4
Table S4. Significantly enriched GO terms with downregualted DEGs due to the combination of heat stress and HF infestation ( HF+Heat vs CK comparison). "
GO_accession	Description	Term_type	Over_represented_pValue	Corrected_pValue	DEG_item	DEG_list	Bg_item	Bg_list	Gene_names
GO:0044815	DNA packaging complex	cellular_component	8.9391e-288	6.0089e-284	340	2784	565	74606	TRIAE_CS42_3B_TGACv1_221292_AA0736430,TRIAE_CS42_5BL_TGACv1_406954_AA1351800,TRIAE_CS42_7AL_TGACv1_558158_AA1790770,TRIAE_CS42_1AL_TGACv1_000306_AA0008450,TRIAE_CS42_7BS_TGACv1_591871_AA1924070,TRIAE_CS42_5DL_TGACv1_434840_AA1442370,TRIAE_CS42_U_TGACv1_644773_AA2141580,TRIAE_CS42_1AL_TGACv1_001233_AA0027610,TRIAE_CS42_1DL_TGACv1_064811_AA0235770,TRIAE_CS42_U_TGACv1_643832_AA2135390,TRIAE_CS42_3AS…
GO:0032993	protein-DNA complex	cellular_component	1.5357e-286	5.1616e-283	341	2784	572	74606	TRIAE_CS42_3DL_TGACv1_249465_AA0849410,TRIAE_CS42_3B_TGACv1_225608_AA0810340,TRIAE_CS42_5DL_TGACv1_433508_AA1415050,TRIAE_CS42_1AL_TGACv1_000710_AA0017560,TRIAE_CS42_3B_TGACv1_220915_AA0723570,TRIAE_CS42_3DL_TGACv1_249662_AA0853770,TRIAE_CS42_6DS_TGACv1_543230_AA1737240,TRIAE_CS42_7DL_TGACv1_605433_AA2006540,TRIAE_CS42_4DL_TGACv1_344965_AA1150720,TRIAE_CS42_7DS_TGACv1_624544_AA2061900,TRIAE_CS42_…
GO:0000786	nucleosome	cellular_component	1.0185e-284	2.2822e-281	336	2784	555	74606	TRIAE_CS42_U_TGACv1_644773_AA2141590,TRIAE_CS42_1AL_TGACv1_002871_AA0045770,TRIAE_CS42_1BL_TGACv1_031648_AA0117830,TRIAE_CS42_3AL_TGACv1_196476_AA0660640,TRIAE_CS42_6DS_TGACv1_543728_AA1743570,TRIAE_CS42_1AL_TGACv1_000106_AA0003480,TRIAE_CS42_1DL_TGACv1_066015_AA0237640,TRIAE_CS42_7AS_TGACv1_569469_AA1816820,TRIAE_CS42_6BS_TGACv1_514209_AA1657000,TRIAE_CS42_U_TGACv1_641129_AA2086300,TRIAE_CS42_U_…
GO:0000785	chromatin	cellular_component	2.1225e-270	3.5668e-267	336	2784	608	74606	TRIAE_CS42_2AL_TGACv1_093247_AA0275890,TRIAE_CS42_2BL_TGACv1_129425_AA0383190,TRIAE_CS42_1DL_TGACv1_061065_AA0183720,TRIAE_CS42_2AL_TGACv1_095006_AA0305840,TRIAE_CS42_1BS_TGACv1_049375_AA0151120,TRIAE_CS42_7BL_TGACv1_577589_AA1879110,TRIAE_CS42_1BL_TGACv1_030948_AA0104150,TRIAE_CS42_3AL_TGACv1_195757_AA0653580,TRIAE_CS42_U_TGACv1_640949_AA2080400,TRIAE_CS42_5DL_TGACv1_433241_AA1406670,TRIAE_CS42_…
GO:0044427	chromosomal part	cellular_component	2.3547e-254	3.1657e-251	349	2784	751	74606	TRIAE_CS42_6AS_TGACv1_486132_AA1557300,TRIAE_CS42_7DL_TGACv1_604016_AA1992390,TRIAE_CS42_1BL_TGACv1_032638_AA0132190,TRIAE_CS42_U_TGACv1_641194_AA2087840,TRIAE_CS42_1DL_TGACv1_061177_AA0187890,TRIAE_CS42_1DL_TGACv1_062964_AA0222320,TRIAE_CS42_1BL_TGACv1_035752_AA0147030,TRIAE_CS42_6DS_TGACv1_543203_AA1736970,TRIAE_CS42_1DL_TGACv1_062308_AA0212250,TRIAE_CS42_7DS_TGACv1_622068_AA2032140,TRIAE_CS42_…
GO:0046982	protein heterodimerization activity	molecular_function	1.2314e-243	1.3796e-240	326	2784	649	74606	TRIAE_CS42_5BL_TGACv1_404599_AA1305700,TRIAE_CS42_7BL_TGACv1_577364_AA1873510,TRIAE_CS42_5BL_TGACv1_404742_AA1309800,TRIAE_CS42_5BL_TGACv1_407460_AA1357140,TRIAE_CS42_3DL_TGACv1_250081_AA0861870,TRIAE_CS42_1AS_TGACv1_019041_AA0058780,TRIAE_CS42_1BL_TGACv1_032427_AA0129750,TRIAE_CS42_6AS_TGACv1_486132_AA1557290,TRIAE_CS42_5DS_TGACv1_457527_AA1487540,TRIAE_CS42_6AS_TGACv1_486079_AA1556510,TRIAE_CS4…
GO:0005694	chromosome	cellular_component	4.841e-231	4.6488e-228	351	2784	908	74606	TRIAE_CS42_5BL_TGACv1_404429_AA1299600,TRIAE_CS42_5BL_TGACv1_412119_AA1367740,TRIAE_CS42_4DL_TGACv1_342972_AA1126540,TRIAE_CS42_4DL_TGACv1_342899_AA1124970,TRIAE_CS42_1AL_TGACv1_002595_AA0043450,TRIAE_CS42_5DL_TGACv1_435972_AA1456840,TRIAE_CS42_7DL_TGACv1_604698_AA2000810,TRIAE_CS42_1BL_TGACv1_031433_AA0113930,TRIAE_CS42_6AS_TGACv1_485977_AA1555100,TRIAE_CS42_2DL_TGACv1_158298_AA0515090,TRIAE_CS4…
GO:0044446	intracellular organelle part	cellular_component	2.6269e-199	2.2073e-196	693	2784	4949	74606	TRIAE_CS42_3DS_TGACv1_272832_AA0925630,TRIAE_CS42_2BL_TGACv1_129425_AA0383190,TRIAE_CS42_2DL_TGACv1_158618_AA0523310,TRIAE_CS42_2AL_TGACv1_095006_AA0305840,TRIAE_CS42_1BS_TGACv1_049375_AA0151120,TRIAE_CS42_5DL_TGACv1_434747_AA1440970,TRIAE_CS42_U_TGACv1_640949_AA2080400,TRIAE_CS42_1BL_TGACv1_031692_AA0118950,TRIAE_CS42_1BL_TGACv1_031047_AA0106660,TRIAE_CS42_7BL_TGACv1_577724_AA1881930,TRIAE_CS42_…
GO:0044422	organelle part	cellular_component	4.0367e-199	3.015e-196	693	2784	4953	74606	TRIAE_CS42_4AL_TGACv1_292578_AA0999200,TRIAE_CS42_6DL_TGACv1_528287_AA1713070,TRIAE_CS42_1BL_TGACv1_032248_AA0127430,TRIAE_CS42_1DL_TGACv1_061203_AA0188640,TRIAE_CS42_1AL_TGACv1_000625_AA0016150,TRIAE_CS42_4DS_TGACv1_361266_AA1164530,TRIAE_CS42_5DL_TGACv1_434833_AA1442310,TRIAE_CS42_4AL_TGACv1_291250_AA0993200,TRIAE_CS42_3DS_TGACv1_273777_AA0933410,TRIAE_CS42_1DL_TGACv1_062308_AA0212260,TRIAE_CS4…
GO:0043234	protein complex	cellular_component	2.5293e-186	1.7002e-183	538	2784	3161	74606	TRIAE_CS42_U_TGACv1_640700_AA2069590,TRIAE_CS42_3AL_TGACv1_195859_AA0654910,TRIAE_CS42_U_TGACv1_640751_AA2072500,TRIAE_CS42_6AS_TGACv1_488574_AA1575780,TRIAE_CS42_3AS_TGACv1_211393_AA0689710,TRIAE_CS42_7DS_TGACv1_622603_AA2042460,TRIAE_CS42_5BL_TGACv1_405338_AA1325330,TRIAE_CS42_7DS_TGACv1_624544_AA2061900,TRIAE_CS42_4DL_TGACv1_344965_AA1150720,TRIAE_CS42_3B_TGACv1_221249_AA0735150,TRIAE_CS42_5DL…
GO:0032991	macromolecular complex	cellular_component	1.1723e-180	7.1636e-178	645	2784	4428	74606	TRIAE_CS42_2DL_TGACv1_158517_AA0520630,TRIAE_CS42_6AS_TGACv1_486132_AA1557290,TRIAE_CS42_2BS_TGACv1_146855_AA0474030,TRIAE_CS42_U_TGACv1_641946_AA2108010,TRIAE_CS42_5BL_TGACv1_405295_AA1324290,TRIAE_CS42_3B_TGACv1_222302_AA0761700,TRIAE_CS42_5BL_TGACv1_407460_AA1357140,TRIAE_CS42_6AS_TGACv1_486115_AA1557000,TRIAE_CS42_6BS_TGACv1_514088_AA1654890,TRIAE_CS42_7BL_TGACv1_577364_AA1873510,TRIAE_CS42_5…
GO:0043228	non-membrane-bounded organelle	cellular_component	7.6759e-173	3.9691e-170	485	2784	2572	74606	TRIAE_CS42_7DL_TGACv1_603964_AA1991770,TRIAE_CS42_1DS_TGACv1_080666_AA0251960,TRIAE_CS42_7DL_TGACv1_605062_AA2004300,TRIAE_CS42_5BS_TGACv1_424280_AA1388430,TRIAE_CS42_1BL_TGACv1_033273_AA0138330,TRIAE_CS42_1DL_TGACv1_061172_AA0187770,TRIAE_CS42_7BL_TGACv1_577724_AA1881930,TRIAE_CS42_6BS_TGACv1_515249_AA1668600,TRIAE_CS42_5AL_TGACv1_375015_AA1213980,TRIAE_CS42_5DL_TGACv1_433016_AA1398230,TRIAE_CS4…
GO:0043232	intracellular non-membrane-bounded organelle	cellular_component	7.6759e-173	3.9691e-170	485	2784	2572	74606	TRIAE_CS42_U_TGACv1_643670_AA2134050,TRIAE_CS42_1BS_TGACv1_050766_AA0175240,TRIAE_CS42_1DL_TGACv1_062138_AA0209250,TRIAE_CS42_2AL_TGACv1_097031_AA0322690,TRIAE_CS42_2AS_TGACv1_112674_AA0343230,TRIAE_CS42_6BS_TGACv1_513186_AA1633440,TRIAE_CS42_7DL_TGACv1_602775_AA1968270,TRIAE_CS42_4AS_TGACv1_307192_AA1018230,TRIAE_CS42_3DL_TGACv1_249459_AA0849300,TRIAE_CS42_6AS_TGACv1_486261_AA1558990,TRIAE_CS42_…
GO:0005622	intracellular	cellular_component	1.3441e-155	6.4534e-153	1240	2784	16003	74606	TRIAE_CS42_3DL_TGACv1_251108_AA0877530,TRIAE_CS42_2AL_TGACv1_093541_AA0282230,TRIAE_CS42_5AL_TGACv1_378876_AA1254930,TRIAE_CS42_1BS_TGACv1_050766_AA0175240,TRIAE_CS42_U_TGACv1_642157_AA2112360,TRIAE_CS42_7DL_TGACv1_602775_AA1968270,TRIAE_CS42_7AL_TGACv1_558294_AA1792080,TRIAE_CS42_3DS_TGACv1_272368_AA0919740,TRIAE_CS42_7DL_TGACv1_603574_AA1985820,TRIAE_CS42_6DL_TGACv1_526634_AA1688730,TRIAE_CS42_…
4AS_TGACv1_307317_AA1019370,TRIAE_CS42_U_TGACv1_641043_AA2083140,TRIAE_CS42_7DS_TGACv1_622117_AA2033030,TRIAE_CS42_1AS_TGACv1_018984_AA0057270,TRIAE_CS42_2BL_TGACv1_132610_AA0438600,TRIAE_CS42_3AL_TGACv1_198569_AA0668860,TRIAE_CS42_6AS_TGACv1_486079_AA1556510,TRIAE_CS42_4DS_TGACv1_361391_AA1166860,TRIAE_CS42_6DL_TGACv1_526456_AA1684240,TRIAE_CS42_3DL_TGACv1_251228_AA0879080,TRIAE_CS42_6AS_TGACv1_…
GO:0044424	intracellular part	cellular_component	1.3319e-154	5.9687e-152	1205	2784	15347	74606	TRIAE_CS42_1AL_TGACv1_001233_AA0027610,TRIAE_CS42_2AS_TGACv1_113484_AA0356720,TRIAE_CS42_7BS_TGACv1_591871_AA1924070,TRIAE_CS42_5DL_TGACv1_434840_AA1442370,TRIAE_CS42_2DL_TGACv1_160375_AA0549830,TRIAE_CS42_5AL_TGACv1_379463_AA1256450,TRIAE_CS42_2DL_TGACv1_158215_AA0512750,TRIAE_CS42_3AS_TGACv1_210940_AA0681740,TRIAE_CS42_6DL_TGACv1_528145_AA1711960,TRIAE_CS42_1AL_TGACv1_000306_AA0008450,TRIAE_CS4…
2DS_TGACv1_178829_AA0601430,TRIAE_CS42_4BS_TGACv1_329550_AA1102420,TRIAE_CS42_1DL_TGACv1_062308_AA0212260,TRIAE_CS42_6BL_TGACv1_501267_AA1615480,TRIAE_CS42_1AL_TGACv1_000734_AA0018070,TRIAE_CS42_3DS_TGACv1_273777_AA0933410,TRIAE_CS42_4AL_TGACv1_291250_AA0993200,TRIAE_CS42_4AS_TGACv1_308060_AA1025550,TRIAE_CS42_1BS_TGACv1_049973_AA0165210,TRIAE_CS42_6BS_TGACv1_515612_AA1671370,TRIAE_CS42_6BS_TGACv…
GO:0005623	cell	cellular_component	7.8093e-147	3.2809e-144	1289	2784	17412	74606	TRIAE_CS42_4DL_TGACv1_342557_AA1116570,TRIAE_CS42_6DL_TGACv1_528468_AA1714320,TRIAE_CS42_7DS_TGACv1_622168_AA2034390,TRIAE_CS42_7BL_TGACv1_578270_AA1892170,TRIAE_CS42_5DL_TGACv1_433263_AA1407510,TRIAE_CS42_5AL_TGACv1_375964_AA1229620,TRIAE_CS42_6BL_TGACv1_502708_AA1626110,TRIAE_CS42_2AS_TGACv1_113349_AA0354840,TRIAE_CS42_2AL_TGACv1_093113_AA0272210,TRIAE_CS42_1BL_TGACv1_032734_AA0133480,TRIAE_CS4…
CS42_7AS_TGACv1_569064_AA1806120,TRIAE_CS42_5AL_TGACv1_376140_AA1232710,TRIAE_CS42_3DL_TGACv1_251082_AA0877230,TRIAE_CS42_1DL_TGACv1_061125_AA0186210,TRIAE_CS42_3DS_TGACv1_272104_AA0914870,TRIAE_CS42_3AL_TGACv1_194377_AA0632030,TRIAE_CS42_U_TGACv1_644112_AA2137260,TRIAE_CS42_U_TGACv1_643832_AA2135390,TRIAE_CS42_1AL_TGACv1_000695_AA0017180,TRIAE_CS42_1AL_TGACv1_002304_AA0040720,TRIAE_CS42_U_TGACv1…
GO:0044464	cell part	cellular_component	4.6145e-146	1.8246e-143	1270	2784	17082	74606	TRIAE_CS42_6AL_TGACv1_471446_AA1508970,TRIAE_CS42_1BL_TGACv1_030772_AA0100440,TRIAE_CS42_1BL_TGACv1_030948_AA0104160,TRIAE_CS42_3B_TGACv1_221721_AA0748350,TRIAE_CS42_5DL_TGACv1_437406_AA1466150,TRIAE_CS42_7BS_TGACv1_591781_AA1920850,TRIAE_CS42_1DS_TGACv1_080270_AA0244810,TRIAE_CS42_6DS_TGACv1_543728_AA1743580,TRIAE_CS42_6BS_TGACv1_513938_AA1652520,TRIAE_CS42_U_TGACv1_647071_AA2147380,TRIAE_CS42_3…
S42_3DL_TGACv1_250081_AA0861860,TRIAE_CS42_1DL_TGACv1_063069_AA0223540,TRIAE_CS42_4AL_TGACv1_290051_AA0980910,TRIAE_CS42_5AL_TGACv1_375964_AA1229620,TRIAE_CS42_6BL_TGACv1_502708_AA1626110,TRIAE_CS42_6DL_TGACv1_528468_AA1714320,TRIAE_CS42_4DL_TGACv1_342557_AA1116570,TRIAE_CS42_7DS_TGACv1_622168_AA2034390,TRIAE_CS42_7BL_TGACv1_578270_AA1892170,TRIAE_CS42_5DL_TGACv1_433263_AA1407510,TRIAE_CS42_3DL_T…
GO:0043229	intracellular organelle	cellular_component	6.7368e-141	2.5158e-138	1078	2784	13308	74606	TRIAE_CS42_1AL_TGACv1_000384_AA0010710,TRIAE_CS42_6DS_TGACv1_543728_AA1743560,TRIAE_CS42_7AS_TGACv1_569480_AA1817080,TRIAE_CS42_3DL_TGACv1_249219_AA0841850,TRIAE_CS42_2BL_TGACv1_132371_AA0437200,TRIAE_CS42_3B_TGACv1_223826_AA0788050,TRIAE_CS42_3DL_TGACv1_249892_AA0858230,TRIAE_CS42_3B_TGACv1_223314_AA0780090,TRIAE_CS42_3AL_TGACv1_193741_AA0618880,TRIAE_CS42_7BL_TGACv1_578034_AA1888270,TRIAE_CS42_…
U_TGACv1_642157_AA2112360,TRIAE_CS42_7DL_TGACv1_602775_AA1968270,TRIAE_CS42_1BL_TGACv1_030553_AA0093880,TRIAE_CS42_6DL_TGACv1_527470_AA1704490,TRIAE_CS42_U_TGACv1_641354_AA2092790,TRIAE_CS42_1AL_TGACv1_009365_AA0055660,TRIAE_CS42_2BL_TGACv1_129391_AA0381430,TRIAE_CS42_5BL_TGACv1_404826_AA1312050,TRIAE_CS42_4AS_TGACv1_307588_AA1021740,TRIAE_CS42_2AL_TGACv1_095006_AA0305850,TRIAE_CS42_2BL_TGACv1_13…
GO:0043226	organelle	cellular_component	9.4814e-141	3.3544e-138	1078	2784	13314	74606	TRIAE_CS42_5AL_TGACv1_376771_AA1240790,TRIAE_CS42_3AL_TGACv1_193724_AA0618500,TRIAE_CS42_2BL_TGACv1_129564_AA0388780,TRIAE_CS42_2AL_TGACv1_101425_AA0327790,TRIAE_CS42_6BS_TGACv1_513125_AA1630670,TRIAE_CS42_2BL_TGACv1_129333_AA0379190,TRIAE_CS42_3DL_TGACv1_250627_AA0871260,TRIAE_CS42_7BS_TGACv1_593467_AA1951820,TRIAE_CS42_2DL_TGACv1_160096_AA0546640,TRIAE_CS42_4BL_TGACv1_320358_AA1036590,TRIAE_CS4…
2_3AL_TGACv1_194354_AA0631540,TRIAE_CS42_3B_TGACv1_223576_AA0784150,TRIAE_CS42_7DS_TGACv1_623213_AA2050790,TRIAE_CS42_6BL_TGACv1_500578_AA1606620,TRIAE_CS42_1BL_TGACv1_032841_AA0134640,TRIAE_CS42_3DL_TGACv1_249205_AA0841320,TRIAE_CS42_6BS_TGACv1_515612_AA1671360,TRIAE_CS42_3DS_TGACv1_272258_AA0917870,TRIAE_CS42_7AS_TGACv1_570573_AA1837850,TRIAE_CS42_5DL_TGACv1_438081_AA1467900,TRIAE_CS42_6DL_TGAC…
GO:0046983	protein dimerization activity	molecular_function	3.9658e-127	1.3329e-124	355	2784	1873	74606	TRIAE_CS42_1AL_TGACv1_001145_AA0025890,TRIAE_CS42_1DL_TGACv1_063351_AA0226510,TRIAE_CS42_6BS_TGACv1_513178_AA1633060,TRIAE_CS42_1AS_TGACv1_019041_AA0058770,TRIAE_CS42_2BL_TGACv1_129824_AA0397350,TRIAE_CS42_7BS_TGACv1_591871_AA1924080,TRIAE_CS42_7BS_TGACv1_591871_AA1924010,TRIAE_CS42_1DL_TGACv1_064141_AA0232850,TRIAE_CS42_4AL_TGACv1_290786_AA0989380,TRIAE_CS42_6DS_TGACv1_542879_AA1732020,TRIAE_CS4…
GO:0043231	intracellular membrane-bounded organelle	cellular_component	1.6431e-121	5.2594e-119	959	2784	11977	74606	TRIAE_CS42_7AS_TGACv1_569469_AA1816770,TRIAE_CS42_2AL_TGACv1_094127_AA0292960,TRIAE_CS42_3DL_TGACv1_249301_AA0844620,TRIAE_CS42_3AL_TGACv1_195795_AA0654070,TRIAE_CS42_2BL_TGACv1_131483_AA0428330,TRIAE_CS42_1DL_TGACv1_061593_AA0199400,TRIAE_CS42_6DS_TGACv1_542798_AA1730580,TRIAE_CS42_4BS_TGACv1_329487_AA1101830,TRIAE_CS42_6AS_TGACv1_487522_AA1571220,TRIAE_CS42_4AS_TGACv1_306214_AA1004350,TRIAE_CS4…
L_TGACv1_557210_AA1778130,TRIAE_CS42_1AL_TGACv1_000718_AA0017740,TRIAE_CS42_U_TGACv1_642157_AA2112360,TRIAE_CS42_6AS_TGACv1_486261_AA1558990,TRIAE_CS42_6BL_TGACv1_499834_AA1592800,TRIAE_CS42_6AS_TGACv1_486132_AA1557320,TRIAE_CS42_5DL_TGACv1_437054_AA1464810,TRIAE_CS42_2DL_TGACv1_158148_AA0510540,BAE47678,TRIAE_CS42_4BL_TGACv1_320729_AA1047290,TRIAE_CS42_3AL_TGACv1_195582_AA0651530,TRIAE_CS42_3DL_…
GO:0043227	membrane-bounded organelle	cellular_component	2.1248e-121	6.4921e-119	959	2784	11982	74606	TRIAE_CS42_U_TGACv1_644773_AA2141580,TRIAE_CS42_1AL_TGACv1_001233_AA0027610,TRIAE_CS42_4BL_TGACv1_321458_AA1060720,TRIAE_CS42_2AS_TGACv1_113484_AA0356720,TRIAE_CS42_4DL_TGACv1_343929_AA1141590,TRIAE_CS42_4BL_TGACv1_321242_AA1057770,TRIAE_CS42_5DL_TGACv1_434840_AA1442370,TRIAE_CS42_7BS_TGACv1_591871_AA1924070,TRIAE_CS42_2DL_TGACv1_160375_AA0549830,TRIAE_CS42_5DL_TGACv1_435922_AA1456290,TRIAE_CS42_…
_CS42_U_TGACv1_645145_AA2143260,TRIAE_CS42_6DL_TGACv1_527898_AA1709630,TRIAE_CS42_6BS_TGACv1_514209_AA1657000,TRIAE_CS42_3AL_TGACv1_196872_AA0663430,TRIAE_CS42_4BL_TGACv1_321170_AA1056520,TRIAE_CS42_7DS_TGACv1_621446_AA2015840,TRIAE_CS42_U_TGACv1_642463_AA2118090,TRIAE_CS42_6BL_TGACv1_501444_AA1617580,TRIAE_CS42_4AL_TGACv1_290500_AA0986100,TRIAE_CS42_1AL_TGACv1_001526_AA0031720,TRIAE_CS42_6BS_TGA…
GO:0005737	cytoplasm	cellular_component	2.3706e-80	6.9283e-78	662	2784	8111	74606	TRIAE_CS42_U_TGACv1_643342_AA2130900,TRIAE_CS42_3AL_TGACv1_193689_AA0617640,TRIAE_CS42_4DS_TGACv1_362115_AA1176910,TRIAE_CS42_5AS_TGACv1_392500_AA1259630,TRIAE_CS42_7BL_TGACv1_577000_AA1862420,TRIAE_CS42_4BL_TGACv1_320636_AA1045250,TRIAE_CS42_3B_TGACv1_223452_AA0782450,TRIAE_CS42_7BS_TGACv1_592259_AA1934400,TRIAE_CS42_2AL_TGACv1_094865_AA0304200,TRIAE_CS42_4BS_TGACv1_329474_AA1101780,TRIAE_CS42_3…
GO:0044444	cytoplasmic part	cellular_component	2.3172e-76	6.49e-74	591	2784	6942	74606	TRIAE_CS42_7BS_TGACv1_592896_AA1945990,TRIAE_CS42_7AS_TGACv1_571112_AA1844780,TRIAE_CS42_1DL_TGACv1_062706_AA0218480,TRIAE_CS42_5BL_TGACv1_405982_AA1338590,TRIAE_CS42_2DL_TGACv1_162453_AA0562830,TRIAE_CS42_4DL_TGACv1_343056_AA1128680,TRIAE_CS42_4DL_TGACv1_343985_AA1142210,TRIAE_CS42_3DL_TGACv1_250988_AA0875910,TRIAE_CS42_2AS_TGACv1_114187_AA0364780,TRIAE_CS42_1AS_TGACv1_019520_AA0067630,TRIAE_CS4…
GO:0006323	DNA packaging	biological_process	2.4819e-76	6.6733e-74	104	2784	219	74606	TRIAE_CS42_1AL_TGACv1_001233_AA0027610,TRIAE_CS42_U_TGACv1_644773_AA2141580,TRIAE_CS42_6BS_TGACv1_513207_AA1634500,TRIAE_CS42_2BL_TGACv1_129685_AA0392600,TRIAE_CS42_3AL_TGACv1_196476_AA0660640,TRIAE_CS42_5DL_TGACv1_434840_AA1442370,TRIAE_CS42_1DL_TGACv1_064811_AA0235770,TRIAE_CS42_6BS_TGACv1_515258_AA1668690,TRIAE_CS42_2AL_TGACv1_098666_AA0326490,TRIAE_CS42_6AL_TGACv1_473440_AA1531120,TRIAE_CS42_…
GO:0006334	nucleosome assembly	biological_process	9.8194e-75	2.5387e-72	99	2784	195	74606	TRIAE_CS42_1BL_TGACv1_032167_AA0126220,TRIAE_CS42_1AS_TGACv1_019334_AA0064970,TRIAE_CS42_6BS_TGACv1_513828_AA1650380,TRIAE_CS42_2DL_TGACv1_158517_AA0520630,TRIAE_CS42_1DL_TGACv1_061172_AA0187770,TRIAE_CS42_1DL_TGACv1_064263_AA0233610,TRIAE_CS42_6AS_TGACv1_486655_AA1563770,TRIAE_CS42_5DL_TGACv1_435878_AA1455830,TRIAE_CS42_5DL_TGACv1_433876_AA1424220,TRIAE_CS42_5BL_TGACv1_407099_AA1353300,TRIAE_CS4…
GO:0031497	chromatin assembly	biological_process	1.6452e-74	4.0959e-72	99	2784	196	74606	TRIAE_CS42_1DL_TGACv1_064263_AA0233610,TRIAE_CS42_1DL_TGACv1_061172_AA0187770,TRIAE_CS42_2DL_TGACv1_158517_AA0520630,TRIAE_CS42_6BS_TGACv1_513828_AA1650380,TRIAE_CS42_1AS_TGACv1_019334_AA0064970,TRIAE_CS42_1BL_TGACv1_032167_AA0126220,TRIAE_CS42_5DL_TGACv1_433876_AA1424220,TRIAE_CS42_5BL_TGACv1_407099_AA1353300,TRIAE_CS42_5DL_TGACv1_435878_AA1455830,TRIAE_CS42_6AS_TGACv1_486655_AA1563770,TRIAE_CS4…
GO:0034728	nucleosome organization	biological_process	4.7853e-74	1.1488e-71	99	2784	198	74606	TRIAE_CS42_4BL_TGACv1_321170_AA1056520,TRIAE_CS42_6BS_TGACv1_513293_AA1637680,TRIAE_CS42_1DL_TGACv1_061203_AA0188640,TRIAE_CS42_5BL_TGACv1_406196_AA1342070,TRIAE_CS42_1BL_TGACv1_031587_AA0116540,TRIAE_CS42_1BL_TGACv1_031614_AA0117220,TRIAE_CS42_1DL_TGACv1_061704_AA0201970,TRIAE_CS42_2BL_TGACv1_131580_AA0429350,TRIAE_CS42_1AL_TGACv1_003580_AA0050490,TRIAE_CS42_3DS_TGACv1_272711_AA0924210,TRIAE_CS4…
GO:0006333	chromatin assembly or disassembly	biological_process	1.4418e-72	3.342e-70	99	2784	204	74606	TRIAE_CS42_6BL_TGACv1_499537_AA1585240,TRIAE_CS42_1BL_TGACv1_032734_AA0133480,TRIAE_CS42_2DL_TGACv1_158996_AA0530240,TRIAE_CS42_2AL_TGACv1_095205_AA0308310,TRIAE_CS42_1DL_TGACv1_064141_AA0232850,TRIAE_CS42_3B_TGACv1_224221_AA0794070,TRIAE_CS42_U_TGACv1_643349_AA2131010,TRIAE_CS42_5AL_TGACv1_375137_AA1216720,TRIAE_CS42_6AS_TGACv1_485161_AA1538470,TRIAE_CS42_2BL_TGACv1_129824_AA0397350,TRIAE_CS42_6…
GO:0044281	small molecule metabolic process	biological_process	1.701e-64	3.8114e-62	327	2784	3211	74606	TRIAE_CS42_6AL_TGACv1_471819_AA1514670,TRIAE_CS42_1DS_TGACv1_081340_AA0260080,TRIAE_CS42_1AL_TGACv1_000254_AA0007370,TRIAE_CS42_4DS_TGACv1_361731_AA1172190,TRIAE_CS42_2DL_TGACv1_160628_AA0552420,TRIAE_CS42_3DL_TGACv1_249127_AA0838760,TRIAE_CS42_4BL_TGACv1_322099_AA1068530,TRIAE_CS42_4DL_TGACv1_343142_AA1130440,TRIAE_CS42_U_TGACv1_641465_AA2095880,TRIAE_CS42_5BL_TGACv1_404481_AA1301440,TRIAE_CS42_…
GO:0065004	protein-DNA complex assembly	biological_process	1.2815e-62	2.7788e-60	99	2784	257	74606	TRIAE_CS42_1DL_TGACv1_064811_AA0235770,TRIAE_CS42_6BS_TGACv1_515258_AA1668690,TRIAE_CS42_1AL_TGACv1_001233_AA0027610,TRIAE_CS42_U_TGACv1_644773_AA2141580,TRIAE_CS42_6BS_TGACv1_513207_AA1634500,TRIAE_CS42_2BL_TGACv1_129685_AA0392600,TRIAE_CS42_3AL_TGACv1_196476_AA0660640,TRIAE_CS42_5DL_TGACv1_434840_AA1442370,TRIAE_CS42_2BL_TGACv1_131483_AA0428330,TRIAE_CS42_1AL_TGACv1_000306_AA0008450,TRIAE_CS42_…
GO:0071824	protein-DNA complex subunit organization	biological_process	3.7768e-62	7.9335e-60	99	2784	260	74606	TRIAE_CS42_6AS_TGACv1_486655_AA1563770,TRIAE_CS42_5DL_TGACv1_435878_AA1455830,TRIAE_CS42_5BL_TGACv1_407099_AA1353300,TRIAE_CS42_5DL_TGACv1_433876_AA1424220,TRIAE_CS42_1BL_TGACv1_032167_AA0126220,TRIAE_CS42_1AS_TGACv1_019334_AA0064970,TRIAE_CS42_6BS_TGACv1_513828_AA1650380,TRIAE_CS42_2DL_TGACv1_158517_AA0520630,TRIAE_CS42_1DL_TGACv1_061172_AA0187770,TRIAE_CS42_1DL_TGACv1_064263_AA0233610,TRIAE_CS4…
GO:0071103	DNA conformation change	biological_process	5.8911e-59	1.2e-56	115	2784	451	74606	TRIAE_CS42_3B_TGACv1_221249_AA0735150,TRIAE_CS42_1DL_TGACv1_062308_AA0212260,TRIAE_CS42_6AS_TGACv1_486735_AA1564570,TRIAE_CS42_6BS_TGACv1_513202_AA1634200,TRIAE_CS42_1BL_TGACv1_032734_AA0133490,TRIAE_CS42_6BS_TGACv1_513781_AA1649430,TRIAE_CS42_U_TGACv1_644372_AA2139060,TRIAE_CS42_U_TGACv1_644101_AA2137180,TRIAE_CS42_1DS_TGACv1_080918_AA0255560,TRIAE_CS42_U_TGACv1_644700_AA2141220,TRIAE_CS42_1BL_T…
GO:0005634	nucleus	cellular_component	3.3317e-54	6.587e-52	538	2784	7079	74606	TRIAE_CS42_7BL_TGACv1_577483_AA1876500,TRIAE_CS42_3AS_TGACv1_211147_AA0686100,TRIAE_CS42_1BL_TGACv1_034569_AA0144890,TRIAE_CS42_6BS_TGACv1_513781_AA1649430,TRIAE_CS42_1BL_TGACv1_032638_AA0132200,TRIAE_CS42_4BS_TGACv1_329474_AA1101780,TRIAE_CS42_7AL_TGACv1_558227_AA1791320,TRIAE_CS42_1DS_TGACv1_080918_AA0255560,TRIAE_CS42_2AL_TGACv1_093053_AA0270540,TRIAE_CS42_6AS_TGACv1_486359_AA1560440,TRIAE_CS4…
GO:0009507	chloroplast	cellular_component	6.0109e-54	1.1544e-51	253	2784	2187	74606	TRIAE_CS42_3B_TGACv1_220619_AA0711750,TRIAE_CS42_5BL_TGACv1_404870_AA1313320,TRIAE_CS42_4DL_TGACv1_342971_AA1126430,TRIAE_CS42_4DL_TGACv1_343812_AA1140000,TRIAE_CS42_1DL_TGACv1_063673_AA0229730,TRIAE_CS42_3B_TGACv1_222044_AA0755660,TRIAE_CS42_5AL_TGACv1_375255_AA1218640,TRIAE_CS42_5AL_TGACv1_378876_AA1254930,TRIAE_CS42_1AL_TGACv1_000132_AA0004290,TRIAE_CS42_3DL_TGACv1_251108_AA0877530,TRIAE_CS42_…
GO:0009536	plastid	cellular_component	7.9831e-54	1.4906e-51	259	2784	2278	74606	TRIAE_CS42_1DS_TGACv1_082951_AA0265140,TRIAE_CS42_2BL_TGACv1_129772_AA0395390,TRIAE_CS42_2AL_TGACv1_095862_AA0315240,TRIAE_CS42_2BL_TGACv1_131614_AA0429850,TRIAE_CS42_5AL_TGACv1_378876_AA1254920,TRIAE_CS42_6DS_TGACv1_544208_AA1747240,TRIAE_CS42_5BL_TGACv1_404454_AA1300370,TRIAE_CS42_4AL_TGACv1_290051_AA0980910,TRIAE_CS42_6BS_TGACv1_514208_AA1656990,TRIAE_CS42_2BS_TGACv1_146384_AA0464010,TRIAE_CS4…
GO:0034622	cellular macromolecular complex assembly	biological_process	1.4157e-52	2.5721e-50	130	2784	619	74606	TRIAE_CS42_U_TGACv1_642463_AA2118090,TRIAE_CS42_4BL_TGACv1_321170_AA1056520,TRIAE_CS42_6BS_TGACv1_513293_AA1637680,TRIAE_CS42_1DL_TGACv1_061203_AA0188640,TRIAE_CS42_1DL_TGACv1_061704_AA0201970,TRIAE_CS42_2BL_TGACv1_131580_AA0429350,TRIAE_CS42_3DS_TGACv1_272711_AA0924210,TRIAE_CS42_1BL_TGACv1_032734_AA0133490,TRIAE_CS42_U_TGACv1_644372_AA2139060,TRIAE_CS42_6BS_TGACv1_513202_AA1634200,TRIAE_CS42_6A…
GO:0003677	DNA binding	molecular_function	3.2899e-52	5.8196e-50	473	2784	5886	74606	TRIAE_CS42_1AS_TGACv1_019932_AA0072990,TRIAE_CS42_5BL_TGACv1_412119_AA1367740,TRIAE_CS42_5AS_TGACv1_393478_AA1272980,TRIAE_CS42_5BL_TGACv1_404429_AA1299600,TRIAE_CS42_2DL_TGACv1_160131_AA0547250,TRIAE_CS42_4DL_TGACv1_342972_AA1126540,TRIAE_CS42_4DL_TGACv1_342899_AA1124970,TRIAE_CS42_7DL_TGACv1_604698_AA2000810,TRIAE_CS42_5DL_TGACv1_435972_AA1456840,TRIAE_CS42_1AL_TGACv1_002595_AA0043450,TRIAE_CS4…
GO:0006461	protein complex assembly	biological_process	1.6085e-50	2.7724e-48	119	2784	539	74606	TRIAE_CS42_4BL_TGACv1_321170_AA1056520,TRIAE_CS42_6BL_TGACv1_501444_AA1617580,TRIAE_CS42_1DL_TGACv1_061203_AA0188640,TRIAE_CS42_6BS_TGACv1_513293_AA1637680,TRIAE_CS42_1DL_TGACv1_061704_AA0201970,TRIAE_CS42_1BL_TGACv1_031614_AA0117220,TRIAE_CS42_1BL_TGACv1_031587_AA0116540,TRIAE_CS42_5BL_TGACv1_406196_AA1342070,TRIAE_CS42_4DL_TGACv1_342367_AA1111630,TRIAE_CS42_3DS_TGACv1_272711_AA0924210,TRIAE_CS4…
GO:0070271	protein complex biogenesis	biological_process	9.8951e-50	1.6629e-47	119	2784	548	74606	TRIAE_CS42_5DS_TGACv1_456910_AA1479880,TRIAE_CS42_6BS_TGACv1_515258_AA1668690,TRIAE_CS42_4AS_TGACv1_307317_AA1019370,TRIAE_CS42_3AL_TGACv1_194328_AA0631110,TRIAE_CS42_1DL_TGACv1_064811_AA0235770,TRIAE_CS42_3AL_TGACv1_196476_AA0660640,TRIAE_CS42_2BL_TGACv1_129685_AA0392600,TRIAE_CS42_1AL_TGACv1_001233_AA0027610,TRIAE_CS42_U_TGACv1_644773_AA2141580,TRIAE_CS42_6BS_TGACv1_513207_AA1634500,TRIAE_CS42_…
GO:0006082	organic acid metabolic process	biological_process	1.9861e-49	3.2563e-47	218	2784	1987	74606	TRIAE_CS42_5DL_TGACv1_435523_AA1451630,TRIAE_CS42_3B_TGACv1_226039_AA0813550,TRIAE_CS42_2DS_TGACv1_178228_AA0593010,TRIAE_CS42_5BS_TGACv1_423649_AA1381290,TRIAE_CS42_7DS_TGACv1_623765_AA2056000,TRIAE_CS42_5AL_TGACv1_376570_AA1238560,TRIAE_CS42_5DS_TGACv1_457334_AA1485300,TRIAE_CS42_6AL_TGACv1_471645_AA1512290,TRIAE_CS42_7BL_TGACv1_578344_AA1893330,TRIAE_CS42_1AS_TGACv1_021532_AA0081820,TRIAE_CS42…
GO:0043436	oxoacid metabolic process	biological_process	9.9921e-49	1.5992e-46	216	2784	1978	74606	TRIAE_CS42_U_TGACv1_641432_AA2094970,TRIAE_CS42_6DS_TGACv1_543240_AA1737380,TRIAE_CS42_5BL_TGACv1_406279_AA1343630,TRIAE_CS42_3B_TGACv1_222610_AA0767770,TRIAE_CS42_2DS_TGACv1_179544_AA0607840,TRIAE_CS42_1BL_TGACv1_030850_AA0102280,TRIAE_CS42_1DL_TGACv1_063603_AA0229020,TRIAE_CS42_2AL_TGACv1_094283_AA0295250,TRIAE_CS42_3AL_TGACv1_193640_AA0616020,TRIAE_CS42_2AL_TGACv1_094054_AA0291710,TRIAE_CS42_5…
GO:0065003	macromolecular complex assembly	biological_process	3.787e-48	5.92e-46	133	2784	720	74606	TRIAE_CS42_1DL_TGACv1_064263_AA0233610,TRIAE_CS42_1AS_TGACv1_019334_AA0064970,TRIAE_CS42_1BL_TGACv1_032167_AA0126220,TRIAE_CS42_5DL_TGACv1_435878_AA1455830,TRIAE_CS42_5AS_TGACv1_393346_AA1271570,TRIAE_CS42_5BL_TGACv1_407099_AA1353300,TRIAE_CS42_5DL_TGACv1_433876_AA1424220,TRIAE_CS42_5AL_TGACv1_377520_AA1247660,TRIAE_CS42_6AS_TGACv1_486655_AA1563770,TRIAE_CS42_1AL_TGACv1_001382_AA0029680,TRIAE_CS4…
GO:0071822	protein complex subunit organization	biological_process	3.1297e-47	4.7813e-45	130	2784	710	74606	TRIAE_CS42_4DS_TGACv1_362497_AA1180110,TRIAE_CS42_5AL_TGACv1_375015_AA1213980,TRIAE_CS42_5DL_TGACv1_433016_AA1398230,TRIAE_CS42_6BS_TGACv1_513828_AA1650380,TRIAE_CS42_2DL_TGACv1_158517_AA0520630,TRIAE_CS42_1DL_TGACv1_061172_AA0187770,TRIAE_CS42_5DL_TGACv1_433323_AA1409740,TRIAE_CS42_5BL_TGACv1_405271_AA1323660,TRIAE_CS42_2BL_TGACv1_129425_AA0383190,TRIAE_CS42_1AS_TGACv1_019520_AA0067630,TRIAE_CS4…
GO:0044435	plastid part	cellular_component	3.4857e-47	5.2068e-45	172	2784	1218	74606	TRIAE_CS42_1BL_TGACv1_032431_AA0129810,TRIAE_CS42_6AL_TGACv1_472556_AA1523550,TRIAE_CS42_1BL_TGACv1_030666_AA0097340,TRIAE_CS42_3AS_TGACv1_212176_AA0698420,TRIAE_CS42_U_TGACv1_641505_AA2096780,TRIAE_CS42_U_TGACv1_643126_AA2127630,AIG90452,TRIAE_CS42_2AS_TGACv1_112052_AA0328860,TRIAE_CS42_2DL_TGACv1_158000_AA0505500,TRIAE_CS42_4AL_TGACv1_291250_AA0993200,TRIAE_CS42_4DL_TGACv1_345711_AA1154220,TRIA…
GO:0044434	chloroplast part	cellular_component	3.9553e-47	5.7799e-45	170	2784	1190	74606	TRIAE_CS42_4DL_TGACv1_345711_AA1154220,TRIAE_CS42_4AL_TGACv1_291250_AA0993200,TRIAE_CS42_2DL_TGACv1_158000_AA0505500,TRIAE_CS42_6AL_TGACv1_472556_AA1523550,TRIAE_CS42_1BL_TGACv1_032431_AA0129810,TRIAE_CS42_2AS_TGACv1_112052_AA0328860,AIG90452,TRIAE_CS42_U_TGACv1_643126_AA2127630,TRIAE_CS42_3AS_TGACv1_212176_AA0698420,TRIAE_CS42_U_TGACv1_641505_AA2096780,TRIAE_CS42_1BL_TGACv1_030666_AA0097340,TRIA…
GO:0019752	carboxylic acid metabolic process	biological_process	2.7264e-46	3.8993e-44	210	2784	1952	74606	TRIAE_CS42_5BS_TGACv1_423649_AA1381290,TRIAE_CS42_2DS_TGACv1_178228_AA0593010,TRIAE_CS42_3B_TGACv1_226039_AA0813550,TRIAE_CS42_5DL_TGACv1_435523_AA1451630,TRIAE_CS42_7BL_TGACv1_578344_AA1893330,TRIAE_CS42_5BL_TGACv1_404321_AA1295470,TRIAE_CS42_1AS_TGACv1_021532_AA0081820,TRIAE_CS42_6BL_TGACv1_500652_AA1608010,TRIAE_CS42_5AL_TGACv1_376570_AA1238560,TRIAE_CS42_5DS_TGACv1_457334_AA1485300,TRIAE_CS42…
GO:0005575	cellular_component	cellular_component	2.8384e-42	3.975e-40	1717	2784	35848	74606	TRIAE_CS42_6AS_TGACv1_485161_AA1538470,TRIAE_CS42_1DL_TGACv1_062831_AA0220640,TRIAE_CS42_1BS_TGACv1_050603_AA0173840,TRIAE_CS42_7AL_TGACv1_557129_AA1777160,TRIAE_CS42_7DS_TGACv1_621871_AA2028250,TRIAE_CS42_4DS_TGACv1_361471_AA1168550,TRIAE_CS42_1AL_TGACv1_001426_AA0030330,TRIAE_CS42_5DL_TGACv1_434747_AA1440950,TRIAE_CS42_6BS_TGACv1_513922_AA1652200,TRIAE_CS42_5AL_TGACv1_378077_AA1251060,TRIAE_CS4…
42_1DL_TGACv1_062999_AA0222790,TRIAE_CS42_1AS_TGACv1_020277_AA0076250,TRIAE_CS42_5BL_TGACv1_404429_AA1299600,TRIAE_CS42_3B_TGACv1_221961_AA0753910,TRIAE_CS42_1DL_TGACv1_064307_AA0233870,TRIAE_CS42_7DL_TGACv1_604698_AA2000810,TRIAE_CS42_5DL_TGACv1_435972_AA1456840,TRIAE_CS42_3B_TGACv1_221721_AA0748350,TRIAE_CS42_1BL_TGACv1_030772_AA0100440,TRIAE_CS42_1BL_TGACv1_030948_AA0104160,TRIAE_CS42_1BL_TGAC…
_AA0303350,TRIAE_CS42_7DL_TGACv1_604748_AA2001300,TRIAE_CS42_5DL_TGACv1_434865_AA1442800,TRIAE_CS42_6DS_TGACv1_543728_AA1743560,TRIAE_CS42_7AL_TGACv1_558670_AA1795210,TRIAE_CS42_1AL_TGACv1_000384_AA0010710,TRIAE_CS42_3DL_TGACv1_249219_AA0841850,TRIAE_CS42_3DS_TGACv1_271874_AA0909920,TRIAE_CS42_7AS_TGACv1_569480_AA1817080,TRIAE_CS42_4AL_TGACv1_289336_AA0969290,TRIAE_CS42_3B_TGACv1_223826_AA0788050…
GO:0006996	organelle organization	biological_process	2.0076e-41	2.7541e-39	202	2784	1959	74606	TRIAE_CS42_1DL_TGACv1_062138_AA0209260,TRIAE_CS42_5AS_TGACv1_393543_AA1273700,TRIAE_CS42_6AS_TGACv1_485161_AA1538470,TRIAE_CS42_1BL_TGACv1_032815_AA0134370,TRIAE_CS42_U_TGACv1_643270_AA2129970,TRIAE_CS42_5AL_TGACv1_377385_AA1246370,TRIAE_CS42_6BS_TGACv1_513443_AA1641730,TRIAE_CS42_2DS_TGACv1_177169_AA0567350,TRIAE_CS42_6BS_TGACv1_513922_AA1652200,TRIAE_CS42_1AL_TGACv1_001027_AA0023720,TRIAE_CS42_…
GO:0006325	chromatin organization	biological_process	8.2998e-41	1.1158e-38	108	2784	604	74606	TRIAE_CS42_6AS_TGACv1_486735_AA1564600,TRIAE_CS42_U_TGACv1_644700_AA2141220,TRIAE_CS42_1BL_TGACv1_030287_AA0085480,TRIAE_CS42_1BL_TGACv1_031403_AA0113240,TRIAE_CS42_6AS_TGACv1_487490_AA1570920,TRIAE_CS42_3AS_TGACv1_211147_AA0686100,TRIAE_CS42_1BL_TGACv1_031669_AA0118350,TRIAE_CS42_6DL_TGACv1_528182_AA1712240,TRIAE_CS42_1BL_TGACv1_034569_AA0144890,TRIAE_CS42_4DL_TGACv1_343654_AA1137710,TRIAE_CS42_…
GO:0044763	single-organism cellular process	biological_process	1.5113e-40	1.992e-38	745	2784	13268	74606	TRIAE_CS42_5DL_TGACv1_434482_AA1436750,TRIAE_CS42_1BS_TGACv1_049394_AA0152000,TRIAE_CS42_3B_TGACv1_220873_AA0722080,TRIAE_CS42_4AL_TGACv1_289727_AA0976030,TRIAE_CS42_4BS_TGACv1_330279_AA1106910,TRIAE_CS42_7BL_TGACv1_577759_AA1882740,TRIAE_CS42_3B_TGACv1_224031_AA0791230,TRIAE_CS42_2DS_TGACv1_179266_AA0605730,TRIAE_CS42_3DS_TGACv1_272258_AA0917870,TRIAE_CS42_5DS_TGACv1_457463_AA1486780,TRIAE_CS42_…
GO:0022607	cellular component assembly	biological_process	5.0138e-39	6.4813e-37	136	2784	925	74606	TRIAE_CS42_1DL_TGACv1_061177_AA0187890,TRIAE_CS42_3DL_TGACv1_249459_AA0849300,TRIAE_CS42_5BL_TGACv1_404737_AA1309600,TRIAE_CS42_2DL_TGACv1_159499_AA0539070,TRIAE_CS42_U_TGACv1_642157_AA2112360,TRIAE_CS42_3AL_TGACv1_194109_AA0626680,TRIAE_CS42_1AL_TGACv1_001382_AA0029680,TRIAE_CS42_U_TGACv1_643670_AA2134050,TRIAE_CS42_1DL_TGACv1_062138_AA0209250,TRIAE_CS42_2AL_TGACv1_097031_AA0322690,TRIAE_CS42_5D…
GO:0044711	single-organism biosynthetic process	biological_process	6.9333e-39	8.7935e-37	233	2784	2584	74606	TRIAE_CS42_4DS_TGACv1_361422_AA1167650,TRIAE_CS42_7AS_TGACv1_569826_AA1824850,TRIAE_CS42_7BS_TGACv1_593415_AA1951220,TRIAE_CS42_2AS_TGACv1_113522_AA0357250,TRIAE_CS42_1DL_TGACv1_062210_AA0210500,TRIAE_CS42_4DL_TGACv1_343724_AA1138650,TRIAE_CS42_7AS_TGACv1_572202_AA1851680,TRIAE_CS42_3B_TGACv1_223441_AA0782230,TRIAE_CS42_4AS_TGACv1_306772_AA1013210,TRIAE_CS42_4AL_TGACv1_288528_AA0951160,TRIAE_CS42…
GO:1901564	organonitrogen compound metabolic process	biological_process	7.5708e-39	9.4243e-37	327	2784	3888	74606	TRIAE_CS42_7BL_TGACv1_579063_AA1903600,TRIAE_CS42_6AS_TGACv1_485212_AA1540270,TRIAE_CS42_3AL_TGACv1_198285_AA0668310,TRIAE_CS42_1AS_TGACv1_019223_AA0063510,TRIAE_CS42_5AS_TGACv1_394202_AA1278730,TRIAE_CS42_7BL_TGACv1_577301_AA1871640,TRIAE_CS42_3B_TGACv1_221027_AA0727340,TRIAE_CS42_2AL_TGACv1_094077_AA0292210,TRIAE_CS42_3DL_TGACv1_251896_AA0885850,TRIAE_CS42_1BL_TGACv1_031692_AA0118950,TRIAE_CS42…
GO:0043933	macromolecular complex subunit organization	biological_process	1.8898e-35	2.3097e-33	153	2784	1293	74606	TRIAE_CS42_1BL_TGACv1_031669_AA0118350,TRIAE_CS42_3AS_TGACv1_211147_AA0686100,TRIAE_CS42_4AS_TGACv1_307117_AA1017180,TRIAE_CS42_1BL_TGACv1_034569_AA0144890,TRIAE_CS42_6DL_TGACv1_528182_AA1712240,TRIAE_CS42_6AS_TGACv1_486894_AA1566280,TRIAE_CS42_4BL_TGACv1_320636_AA1045250,TRIAE_CS42_U_TGACv1_644700_AA2141220,TRIAE_CS42_1DS_TGACv1_080918_AA0255560,TRIAE_CS42_1BS_TGACv1_049965_AA0164830,TRIAE_CS42_…
GO:0051276	chromosome organization	biological_process	2.0228e-35	2.4281e-33	127	2784	983	74606	TRIAE_CS42_7BL_TGACv1_578034_AA1888270,TRIAE_CS42_U_TGACv1_644372_AA2139060,TRIAE_CS42_1BL_TGACv1_032734_AA0133490,TRIAE_CS42_6BS_TGACv1_513781_AA1649430,TRIAE_CS42_6BS_TGACv1_513202_AA1634200,TRIAE_CS42_6AS_TGACv1_486735_AA1564570,TRIAE_CS42_1DL_TGACv1_062308_AA0212260,TRIAE_CS42_3B_TGACv1_221249_AA0735150,TRIAE_CS42_1DS_TGACv1_080918_AA0255560,TRIAE_CS42_U_TGACv1_644101_AA2137180,TRIAE_CS42_4DS…
GO:0044699	single-organism process	biological_process	8.8842e-35	1.0477e-32	996	2784	19601	74606	TRIAE_CS42_5DL_TGACv1_433024_AA1398620,TRIAE_CS42_2DS_TGACv1_178228_AA0593010,TRIAE_CS42_1BL_TGACv1_031712_AA0119450,TRIAE_CS42_6AS_TGACv1_486373_AA1560720,TRIAE_CS42_1AS_TGACv1_019137_AA0061430,TRIAE_CS42_1DL_TGACv1_062768_AA0219620,TRIAE_CS42_4AS_TGACv1_308060_AA1025550,TRIAE_CS42_1BL_TGACv1_031106_AA0107890,TRIAE_CS42_1BS_TGACv1_050901_AA0176550,TRIAE_CS42_7AL_TGACv1_556987_AA1774740,TRIAE_CS4…
IAE_CS42_3AS_TGACv1_211390_AA0689620,TRIAE_CS42_5BS_TGACv1_423654_AA1381380,TRIAE_CS42_7AS_TGACv1_569074_AA1806510,TRIAE_CS42_6BL_TGACv1_500073_AA1598240,TRIAE_CS42_5DL_TGACv1_433016_AA1398230,TRIAE_CS42_7AS_TGACv1_569538_AA1818520,TRIAE_CS42_2BS_TGACv1_145984_AA0451870,TRIAE_CS42_3AL_TGACv1_194690_AA0637900,TRIAE_CS42_4DL_TGACv1_343659_AA1137850,TRIAE_CS42_3AS_TGACv1_211026_AA0683390,TRIAE_CS42_…
GO:1901657	glycosyl compound metabolic process	biological_process	7.5513e-33	8.499e-31	91	2784	546	74606	TRIAE_CS42_2AL_TGACv1_094486_AA0298610,TRIAE_CS42_3AL_TGACv1_196429_AA0660330,TRIAE_CS42_1BL_TGACv1_031692_AA0118950,TRIAE_CS42_1AS_TGACv1_019145_AA0061580,TRIAE_CS42_3DL_TGACv1_251713_AA0884060,TRIAE_CS42_6DL_TGACv1_526952_AA1695860,TRIAE_CS42_5BL_TGACv1_406155_AA1341460,TRIAE_CS42_7BL_TGACv1_579063_AA1903600,TRIAE_CS42_7AS_TGACv1_570937_AA1842720,TRIAE_CS42_5AS_TGACv1_394202_AA1278730,TRIAE_CS4…
GO:0042278	purine nucleoside metabolic process	biological_process	7.5861e-33	8.499e-31	83	2784	454	74606	TRIAE_CS42_5DL_TGACv1_434368_AA1434620,TRIAE_CS42_1DL_TGACv1_061176_AA0187850,TRIAE_CS42_3AL_TGACv1_194635_AA0637160,TRIAE_CS42_7DS_TGACv1_622764_AA2045010,TRIAE_CS42_7DL_TGACv1_603800_AA1989460,TRIAE_CS42_2AL_TGACv1_095324_AA0309650,TRIAE_CS42_6BL_TGACv1_500297_AA1602810,TRIAE_CS42_3B_TGACv1_226655_AA0818420,TRIAE_CS42_2AS_TGACv1_112739_AA0344340,TRIAE_CS42_2BL_TGACv1_130381_AA0409970,TRIAE_CS42…
GO:0046128	purine ribonucleoside metabolic process	biological_process	7.5861e-33	8.499e-31	83	2784	454	74606	TRIAE_CS42_5BS_TGACv1_423965_AA1385430,TRIAE_CS42_1BL_TGACv1_030377_AA0088540,TRIAE_CS42_4BS_TGACv1_330279_AA1106910,TRIAE_CS42_1DS_TGACv1_081340_AA0260080,TRIAE_CS42_1BL_TGACv1_030605_AA0095500,TRIAE_CS42_4DS_TGACv1_361731_AA1172190,TRIAE_CS42_2BL_TGACv1_130381_AA0409970,TRIAE_CS42_2AS_TGACv1_112739_AA0344340,TRIAE_CS42_3B_TGACv1_226655_AA0818420,TRIAE_CS42_6BL_TGACv1_500297_AA1602810,TRIAE_CS42…
GO:0009119	ribonucleoside metabolic process	biological_process	7.8944e-33	8.6993e-31	86	2784	490	74606	TRIAE_CS42_3DL_TGACv1_251216_AA0878910,TRIAE_CS42_3B_TGACv1_223258_AA0779170,TRIAE_CS42_3DL_TGACv1_249279_AA0843940,TRIAE_CS42_7BL_TGACv1_579063_AA1903600,TRIAE_CS42_5BL_TGACv1_406155_AA1341460,TRIAE_CS42_7AS_TGACv1_570937_AA1842720,TRIAE_CS42_5AS_TGACv1_394202_AA1278730,TRIAE_CS42_3AL_TGACv1_196429_AA0660330,TRIAE_CS42_1BL_TGACv1_031692_AA0118950,TRIAE_CS42_1AS_TGACv1_019145_AA0061580,TRIAE_CS42…
GO:0009116	nucleoside metabolic process	biological_process	1.5412e-32	1.6709e-30	90	2784	539	74606	TRIAE_CS42_3B_TGACv1_223441_AA0782230,TRIAE_CS42_2DL_TGACv1_158421_AA0518370,TRIAE_CS42_5DL_TGACv1_434833_AA1442310,TRIAE_CS42_3DL_TGACv1_250475_AA0868810,TRIAE_CS42_1DL_TGACv1_062210_AA0210500,TRIAE_CS42_4AL_TGACv1_288604_AA0953590,TRIAE_CS42_7BS_TGACv1_592594_AA1941060,TRIAE_CS42_1BS_TGACv1_049634_AA0158530,TRIAE_CS42_6BS_TGACv1_513938_AA1652520,TRIAE_CS42_7AS_TGACv1_571836_AA1850200,TRIAE_CS42…
GO:0019637	organophosphate metabolic process	biological_process	1.8144e-32	1.936e-30	135	2784	1170	74606	TRIAE_CS42_6AS_TGACv1_485300_AA1542750,TRIAE_CS42_7DS_TGACv1_621640_AA2021920,TRIAE_CS42_3AL_TGACv1_194109_AA0626660,TRIAE_CS42_4AL_TGACv1_288275_AA0943380,TRIAE_CS42_5BL_TGACv1_406546_AA1346870,TRIAE_CS42_5AS_TGACv1_393357_AA1271740,TRIAE_CS42_2DS_TGACv1_177763_AA0584180,TRIAE_CS42_4BL_TGACv1_320456_AA1039910,TRIAE_CS42_4AL_TGACv1_288281_AA0943580,TRIAE_CS42_4DS_TGACv1_361934_AA1174470,TRIAE_CS4…
GO:0072521	purine-containing compound metabolic process	biological_process	3.1627e-32	3.3218e-30	89	2784	534	74606	TRIAE_CS42_2DL_TGACv1_159793_AA0542880,TRIAE_CS42_3B_TGACv1_226039_AA0813550,TRIAE_CS42_6AS_TGACv1_486236_AA1558630,TRIAE_CS42_1AL_TGACv1_002865_AA0045670,TRIAE_CS42_7AS_TGACv1_571836_AA1850200,TRIAE_CS42_5BS_TGACv1_423649_AA1381290,TRIAE_CS42_6BL_TGACv1_499360_AA1579440,TRIAE_CS42_6AL_TGACv1_471645_AA1512290,TRIAE_CS42_5DS_TGACv1_457334_AA1485300,TRIAE_CS42_5AL_TGACv1_376570_AA1238560,TRIAE_CS42…
GO:0044085	cellular component biogenesis	biological_process	1.1835e-31	1.2239e-29	160	2784	1462	74606	TRIAE_CS42_1BL_TGACv1_032734_AA0133480,TRIAE_CS42_2DL_TGACv1_158996_AA0530240,TRIAE_CS42_1DL_TGACv1_064141_AA0232850,TRIAE_CS42_1BL_TGACv1_030590_AA0094940,TRIAE_CS42_6BS_TGACv1_513638_AA1646430,TRIAE_CS42_2AL_TGACv1_095006_AA0305850,TRIAE_CS42_2BL_TGACv1_132538_AA0438250,TRIAE_CS42_6AS_TGACv1_485693_AA1550180,TRIAE_CS42_6DL_TGACv1_527470_AA1704490,TRIAE_CS42_2BL_TGACv1_129824_AA0397350,TRIAE_CS4…
GO:0008150	biological_process	biological_process	1.0182e-30	1.037e-28	1878	2784	42935	74606	TRIAE_CS42_2AS_TGACv1_113806_AA0360900,TRIAE_CS42_3B_TGACv1_222610_AA0767770,TRIAE_CS42_3DL_TGACv1_251459_AA0881700,TRIAE_CS42_1AS_TGACv1_019334_AA0064970,TRIAE_CS42_5BL_TGACv1_406061_AA1340040,TRIAE_CS42_1BL_TGACv1_032167_AA0126220,TRIAE_CS42_5DL_TGACv1_433267_AA1407590,TRIAE_CS42_2BS_TGACv1_146926_AA0475500,TRIAE_CS42_U_TGACv1_641405_AA2094090,TRIAE_CS42_1AL_TGACv1_000591_AA0015400,TRIAE_CS42_3…
E_CS42_5BL_TGACv1_404980_AA1317000,TRIAE_CS42_5DL_TGACv1_433855_AA1423770,TRIAE_CS42_4BS_TGACv1_329255_AA1099300,TRIAE_CS42_5DL_TGACv1_433720_AA1420520,TRIAE_CS42_3B_TGACv1_223804_AA0787670,TRIAE_CS42_7BS_TGACv1_592050_AA1929210,TRIAE_CS42_4DS_TGACv1_362836_AA1182360,TRIAE_CS42_3AL_TGACv1_194070_AA0625890,TRIAE_CS42_4BS_TGACv1_328464_AA1088220,TRIAE_CS42_7BS_TGACv1_593531_AA1952260,TRIAE_CS42_2BS…
A2119280,TRIAE_CS42_3AS_TGACv1_210983_AA0682450,TRIAE_CS42_2DL_TGACv1_158421_AA0518370,TRIAE_CS42_2BL_TGACv1_132202_AA0435990,TRIAE_CS42_1BL_TGACv1_031332_AA0111790,TRIAE_CS42_7DS_TGACv1_622853_AA2046390,TRIAE_CS42_3DS_TGACv1_272293_AA0918520,TRIAE_CS42_1AL_TGACv1_000465_AA0012720,TRIAE_CS42_3AL_TGACv1_194038_AA0625130,TRIAE_CS42_2BS_TGACv1_146275_AA0461220,TRIAE_CS42_3B_TGACv1_222044_AA0755670,T…
GO:0032787	monocarboxylic acid metabolic process	biological_process	1.096e-30	1.0996e-28	106	2784	809	74606	TRIAE_CS42_2BS_TGACv1_146261_AA0460710,TRIAE_CS42_6AS_TGACv1_486115_AA1557000,TRIAE_CS42_6DS_TGACv1_544326_AA1747750,TRIAE_CS42_5DL_TGACv1_433836_AA1423410,TRIAE_CS42_3DS_TGACv1_271475_AA0899660,TRIAE_CS42_3AL_TGACv1_194246_AA0629560,TRIAE_CS42_3B_TGACv1_221200_AA0733610,TRIAE_CS42_2AL_TGACv1_094283_AA0295250,TRIAE_CS42_1DL_TGACv1_063603_AA0229020,TRIAE_CS42_3B_TGACv1_221609_AA0745810,TRIAE_CS42_…
GO:0055086	nucleobase-containing small molecule metabolic process	biological_process	1.0384e-29	1.0265e-27	107	2784	806	74606	TRIAE_CS42_5DL_TGACv1_434833_AA1442310,TRIAE_CS42_2DL_TGACv1_158421_AA0518370,TRIAE_CS42_3B_TGACv1_223441_AA0782230,TRIAE_CS42_7DL_TGACv1_602656_AA1964250,TRIAE_CS42_7AS_TGACv1_569826_AA1824850,TRIAE_CS42_7DS_TGACv1_624347_AA2060690,TRIAE_CS42_3DL_TGACv1_250475_AA0868810,TRIAE_CS42_1DL_TGACv1_062210_AA0210500,TRIAE_CS42_1BS_TGACv1_049634_AA0158530,TRIAE_CS42_4AL_TGACv1_288604_AA0953590,TRIAE_CS42…
GO:0051186	cofactor metabolic process	biological_process	5.9598e-28	5.8061e-26	93	2784	681	74606	TRIAE_CS42_2AL_TGACv1_094127_AA0292960,TRIAE_CS42_4DS_TGACv1_362522_AA1180350,TRIAE_CS42_5AS_TGACv1_393357_AA1271740,TRIAE_CS42_2BS_TGACv1_148429_AA0492770,TRIAE_CS42_1BS_TGACv1_050930_AA0176780,TRIAE_CS42_4BL_TGACv1_320729_AA1047290,TRIAE_CS42_4AS_TGACv1_306569_AA1010320,TRIAE_CS42_1AL_TGACv1_000695_AA0017180,TRIAE_CS42_1AL_TGACv1_000755_AA0018450,TRIAE_CS42_2AL_TGACv1_093410_AA0279600,TRIAE_CS4…
GO:0006090	pyruvate metabolic process	biological_process	7.0369e-28	6.7574e-26	50	2784	203	74606	TRIAE_CS42_2AS_TGACv1_112938_AA0348140,TRIAE_CS42_2AS_TGACv1_112739_AA0344340,TRIAE_CS42_3B_TGACv1_226655_AA0818420,TRIAE_CS42_1DS_TGACv1_081340_AA0260080,TRIAE_CS42_3B_TGACv1_226284_AA0815680,TRIAE_CS42_4BS_TGACv1_330279_AA1106910,TRIAE_CS42_5BS_TGACv1_423965_AA1385430,TRIAE_CS42_1BL_TGACv1_030605_AA0095500,TRIAE_CS42_1DL_TGACv1_062999_AA0222790,TRIAE_CS42_4AL_TGACv1_290300_AA0983760,TRIAE_CS42_…
GO:0009199	ribonucleoside triphosphate metabolic process	biological_process	2.4246e-27	2.2955e-25	68	2784	365	74606	TRIAE_CS42_1BL_TGACv1_031692_AA0118950,TRIAE_CS42_3AL_TGACv1_196429_AA0660330,TRIAE_CS42_3DL_TGACv1_251713_AA0884060,TRIAE_CS42_7AS_TGACv1_570937_AA1842720,TRIAE_CS42_7BL_TGACv1_579063_AA1903600,TRIAE_CS42_5AS_TGACv1_394202_AA1278730,TRIAE_CS42_3DL_TGACv1_251216_AA0878910,TRIAE_CS42_3DL_TGACv1_249279_AA0843940,TRIAE_CS42_3B_TGACv1_223258_AA0779170,TRIAE_CS42_3AL_TGACv1_194246_AA0629560,TRIAE_CS42…
GO:0009765	photosynthesis, light harvesting	biological_process	7.6239e-27	7.1177e-25	39	2784	102	74606	TRIAE_CS42_6BS_TGACv1_514827_AA1664770,TRIAE_CS42_6AS_TGACv1_486605_AA1563110,TRIAE_CS42_5DL_TGACv1_437406_AA1466150,TRIAE_CS42_1BL_TGACv1_032695_AA0133030,TRIAE_CS42_5BL_TGACv1_404454_AA1300300,TRIAE_CS42_6AS_TGACv1_485824_AA1552840,TRIAE_CS42_6AS_TGACv1_485824_AA1552860,TRIAE_CS42_5BL_TGACv1_405399_AA1326490,TRIAE_CS42_6AS_TGACv1_485824_AA1552830,TRIAE_CS42_7BS_TGACv1_592029_AA1928690,TRIAE_CS4…
GO:0009987	cellular process	biological_process	9.2022e-27	8.4736e-25	1384	2784	30445	74606	TRIAE_CS42_6DS_TGACv1_544331_AA1747810,TRIAE_CS42_7DL_TGACv1_603091_AA1975740,TRIAE_CS42_5BL_TGACv1_404481_AA1301440,TRIAE_CS42_6AS_TGACv1_486557_AA1562630,TRIAE_CS42_1AL_TGACv1_003124_AA0048030,TRIAE_CS42_1AL_TGACv1_000254_AA0007370,TRIAE_CS42_6AL_TGACv1_471819_AA1514670,TRIAE_CS42_1BS_TGACv1_051077_AA0177630,TRIAE_CS42_5AS_TGACv1_393382_AA1272050,TRIAE_CS42_6DL_TGACv1_526612_AA1688300,TRIAE_CS4…
BL_TGACv1_406348_AA1344440,TRIAE_CS42_4AL_TGACv1_289580_AA0973450,TRIAE_CS42_4AS_TGACv1_307131_AA1017430,TRIAE_CS42_6BS_TGACv1_514091_AA1654910,TRIAE_CS42_4AS_TGACv1_307317_AA1019370,TRIAE_CS42_5BL_TGACv1_405168_AA1321480,TRIAE_CS42_2BL_TGACv1_129685_AA0392600,TRIAE_CS42_7DL_TGACv1_604116_AA1994020,TRIAE_CS42_4DS_TGACv1_363054_AA1183170,TRIAE_CS42_3AS_TGACv1_210696_AA0677310,TRIAE_CS42_3AS_TGACv1…
GO:0046939	nucleotide phosphorylation	biological_process	1.4591e-26	1.3254e-24	53	2784	236	74606	TRIAE_CS42_2AS_TGACv1_112739_AA0344340,TRIAE_CS42_7BL_TGACv1_579222_AA1905450,TRIAE_CS42_4DL_TGACv1_343142_AA1130440,TRIAE_CS42_3B_TGACv1_226655_AA0818420,TRIAE_CS42_4DS_TGACv1_361731_AA1172190,TRIAE_CS42_1DL_TGACv1_062999_AA0222790,TRIAE_CS42_1BL_TGACv1_030605_AA0095500,TRIAE_CS42_4BS_TGACv1_330279_AA1106910,TRIAE_CS42_3B_TGACv1_226284_AA0815680,TRIAE_CS42_1DS_TGACv1_081340_AA0260080,TRIAE_CS42_…
GO:0009144	purine nucleoside triphosphate metabolic process	biological_process	1.852e-26	1.638e-24	65	2784	343	74606	TRIAE_CS42_7DS_TGACv1_622764_AA2045010,TRIAE_CS42_7DL_TGACv1_603800_AA1989460,TRIAE_CS42_2AL_TGACv1_095324_AA0309650,TRIAE_CS42_1DL_TGACv1_061176_AA0187850,TRIAE_CS42_3AL_TGACv1_194635_AA0637160,TRIAE_CS42_5DL_TGACv1_434368_AA1434620,TRIAE_CS42_4DS_TGACv1_361731_AA1172190,TRIAE_CS42_1BL_TGACv1_030605_AA0095500,TRIAE_CS42_4BS_TGACv1_330279_AA1106910,TRIAE_CS42_1DS_TGACv1_081340_AA0260080,TRIAE_CS4…
GO:0009205	purine ribonucleoside triphosphate metabolic process	biological_process	1.852e-26	1.638e-24	65	2784	343	74606	TRIAE_CS42_4DS_TGACv1_361934_AA1174470,TRIAE_CS42_5AS_TGACv1_393357_AA1271740,TRIAE_CS42_4DS_TGACv1_362522_AA1180350,TRIAE_CS42_4AL_TGACv1_288275_AA0943380,TRIAE_CS42_5BL_TGACv1_406546_AA1346870,TRIAE_CS42_1AL_TGACv1_000492_AA0013410,TRIAE_CS42_1AL_TGACv1_000755_AA0018450,TRIAE_CS42_7AL_TGACv1_558464_AA1793580,TRIAE_CS42_4AL_TGACv1_290300_AA0983760,TRIAE_CS42_7BL_TGACv1_579860_AA1910590,TRIAE_CS4…
GO:0009141	nucleoside triphosphate metabolic process	biological_process	5.2744e-26	4.6045e-24	68	2784	380	74606	TRIAE_CS42_1AL_TGACv1_000755_AA0018450,TRIAE_CS42_3AL_TGACv1_194109_AA0626660,TRIAE_CS42_7AL_TGACv1_558464_AA1793580,TRIAE_CS42_1AL_TGACv1_000492_AA0013410,TRIAE_CS42_5BL_TGACv1_406546_AA1346870,TRIAE_CS42_4AL_TGACv1_288275_AA0943380,TRIAE_CS42_5AS_TGACv1_393357_AA1271740,TRIAE_CS42_4DS_TGACv1_362522_AA1180350,TRIAE_CS42_4DS_TGACv1_361934_AA1174470,TRIAE_CS42_1AL_TGACv1_004040_AA0052320,TRIAE_CS4…
GO:0006163	purine nucleotide metabolic process	biological_process	7.1871e-26	6.1938e-24	74	2784	462	74606	TRIAE_CS42_5DL_TGACv1_434833_AA1442310,TRIAE_CS42_2DL_TGACv1_158421_AA0518370,TRIAE_CS42_3DL_TGACv1_250475_AA0868810,TRIAE_CS42_1DL_TGACv1_062210_AA0210500,TRIAE_CS42_7BS_TGACv1_592594_AA1941060,TRIAE_CS42_4AL_TGACv1_288604_AA0953590,TRIAE_CS42_6BS_TGACv1_513938_AA1652520,TRIAE_CS42_6AS_TGACv1_486236_AA1558630,TRIAE_CS42_5BS_TGACv1_423649_AA1381290,TRIAE_CS42_1AL_TGACv1_002865_AA0045670,TRIAE_CS4…
GO:0009259	ribonucleotide metabolic process	biological_process	1.3128e-25	1.117e-23	75	2784	480	74606	TRIAE_CS42_3AL_TGACv1_196429_AA0660330,TRIAE_CS42_1BL_TGACv1_031692_AA0118950,TRIAE_CS42_6DL_TGACv1_526952_AA1695860,TRIAE_CS42_3DL_TGACv1_251713_AA0884060,TRIAE_CS42_3DL_TGACv1_251216_AA0878910,TRIAE_CS42_3DL_TGACv1_249279_AA0843940,TRIAE_CS42_3B_TGACv1_223258_AA0779170,TRIAE_CS42_7AS_TGACv1_570937_AA1842720,TRIAE_CS42_5BL_TGACv1_406155_AA1341460,TRIAE_CS42_7BL_TGACv1_579063_AA1903600,TRIAE_CS42…
GO:0003676	nucleic acid binding	molecular_function	2.0667e-25	1.7365e-23	604	2784	10697	74606	TRIAE_CS42_2AL_TGACv1_095006_AA0305840,TRIAE_CS42_1BS_TGACv1_049375_AA0151120,TRIAE_CS42_2BL_TGACv1_129425_AA0383190,TRIAE_CS42_2AL_TGACv1_094341_AA0296130,TRIAE_CS42_7BS_TGACv1_592139_AA1931510,TRIAE_CS42_1DL_TGACv1_061401_AA0194240,TRIAE_CS42_4AL_TGACv1_290555_AA0986770,TRIAE_CS42_U_TGACv1_640949_AA2080400,TRIAE_CS42_2DL_TGACv1_161360_AA0558180,TRIAE_CS42_1DL_TGACv1_061172_AA0187770,TRIAE_CS42_…
GO:0019693	ribose phosphate metabolic process	biological_process	2.9552e-25	2.4524e-23	79	2784	537	74606	TRIAE_CS42_3B_TGACv1_226039_AA0813550,TRIAE_CS42_2DL_TGACv1_159793_AA0542880,TRIAE_CS42_5BS_TGACv1_423649_AA1381290,TRIAE_CS42_1AL_TGACv1_002865_AA0045670,TRIAE_CS42_7AS_TGACv1_571836_AA1850200,TRIAE_CS42_6AS_TGACv1_486236_AA1558630,TRIAE_CS42_5AL_TGACv1_376570_AA1238560,TRIAE_CS42_5DS_TGACv1_457334_AA1485300,TRIAE_CS42_6AL_TGACv1_471645_AA1512290,TRIAE_CS42_6BL_TGACv1_499360_AA1579440,TRIAE_CS42…
GO:0044283	small molecule biosynthetic process	biological_process	4.4002e-25	3.6071e-23	117	2784	1102	74606	TRIAE_CS42_7BS_TGACv1_591992_AA1927520,TRIAE_CS42_U_TGACv1_641020_AA2082360,TRIAE_CS42_1AL_TGACv1_000734_AA0018090,TRIAE_CS42_3AS_TGACv1_211963_AA0696070,TRIAE_CS42_7AL_TGACv1_559693_AA1800520,TRIAE_CS42_1DL_TGACv1_062419_AA0214280,TRIAE_CS42_4BS_TGACv1_328160_AA1083740,TRIAE_CS42_7BS_TGACv1_591893_AA1924780,TRIAE_CS42_2BL_TGACv1_130544_AA0413270,TRIAE_CS42_2BL_TGACv1_129564_AA0388780,TRIAE_CS42_…
GO:0009117	nucleotide metabolic process	biological_process	4.4967e-25	3.6418e-23	90	2784	681	74606	TRIAE_CS42_1AL_TGACv1_000051_AA0001340,TRIAE_CS42_3B_TGACv1_221609_AA0745810,TRIAE_CS42_1DL_TGACv1_063603_AA0229020,TRIAE_CS42_2AL_TGACv1_094283_AA0295250,AIG90477,TRIAE_CS42_1AL_TGACv1_002629_AA0043900,TRIAE_CS42_2DS_TGACv1_177244_AA0570280,TRIAE_CS42_7AL_TGACv1_558294_AA1792080,TRIAE_CS42_5BL_TGACv1_406279_AA1343630,TRIAE_CS42_5DL_TGACv1_433836_AA1423410,TRIAE_CS42_3DS_TGACv1_271475_AA0899660,T…
GO:0016043	cellular component organization	biological_process	4.5633e-25	3.6517e-23	248	2784	3438	74606	TRIAE_CS42_7DS_TGACv1_622168_AA2034390,TRIAE_CS42_6DS_TGACv1_542706_AA1728340,TRIAE_CS42_2DL_TGACv1_158996_AA0530240,TRIAE_CS42_1BL_TGACv1_032734_AA0133480,TRIAE_CS42_1DL_TGACv1_062210_AA0210520,TRIAE_CS42_1BL_TGACv1_030590_AA0094940,TRIAE_CS42_1DL_TGACv1_064141_AA0232850,TRIAE_CS42_6DL_TGACv1_527470_AA1704490,TRIAE_CS42_2BL_TGACv1_129824_AA0397350,TRIAE_CS42_6AS_TGACv1_485693_AA1550180,TRIAE_CS4…
GO:0009150	purine ribonucleotide metabolic process	biological_process	5.0868e-25	4.0227e-23	72	2784	452	74606	TRIAE_CS42_7AS_TGACv1_571836_AA1850200,TRIAE_CS42_1AL_TGACv1_002865_AA0045670,TRIAE_CS42_5BS_TGACv1_423649_AA1381290,TRIAE_CS42_6AS_TGACv1_486236_AA1558630,TRIAE_CS42_3B_TGACv1_226039_AA0813550,TRIAE_CS42_2DL_TGACv1_159793_AA0542880,TRIAE_CS42_6AL_TGACv1_473321_AA1530120,TRIAE_CS42_4BS_TGACv1_328687_AA1092120,TRIAE_CS42_5DS_TGACv1_457334_AA1485300,TRIAE_CS42_6AL_TGACv1_471645_AA1512290,TRIAE_CS42…
GO:0006165	nucleoside diphosphate phosphorylation	biological_process	7.7752e-25	6.0773e-23	46	2784	192	74606	TRIAE_CS42_4AL_TGACv1_290300_AA0983760,TRIAE_CS42_4BS_TGACv1_330279_AA1106910,TRIAE_CS42_3B_TGACv1_226284_AA0815680,TRIAE_CS42_1DS_TGACv1_081340_AA0260080,TRIAE_CS42_1BL_TGACv1_030377_AA0088540,TRIAE_CS42_5BS_TGACv1_423965_AA1385430,TRIAE_CS42_4DS_TGACv1_361731_AA1172190,TRIAE_CS42_1DL_TGACv1_062999_AA0222790,TRIAE_CS42_1BL_TGACv1_030605_AA0095500,TRIAE_CS42_3B_TGACv1_226655_AA0818420,TRIAE_CS42_…
GO:0044710	single-organism metabolic process	biological_process	8.1351e-25	6.2855e-23	621	2784	11539	74606	TRIAE_CS42_5AL_TGACv1_375327_AA1219960,TRIAE_CS42_6AS_TGACv1_485300_AA1542750,TRIAE_CS42_7DS_TGACv1_621640_AA2021920,TRIAE_CS42_6AL_TGACv1_474572_AA1535460,TRIAE_CS42_3B_TGACv1_223718_AA0786110,TRIAE_CS42_5BL_TGACv1_406546_AA1346870,TRIAE_CS42_2AL_TGACv1_095767_AA0314320,TRIAE_CS42_5AS_TGACv1_393357_AA1271740,TRIAE_CS42_3B_TGACv1_222825_AA0771410,TRIAE_CS42_3DL_TGACv1_249135_AA0839230,TRIAE_CS42_…
GO:1901566	organonitrogen compound biosynthetic process	biological_process	1.3443e-24	1.0268e-22	229	2784	2782	74606	TRIAE_CS42_1AL_TGACv1_004424_AA0053450,TRIAE_CS42_4AS_TGACv1_306569_AA1010320,TRIAE_CS42_1AL_TGACv1_000492_AA0013410,TRIAE_CS42_4DS_TGACv1_361995_AA1175430,TRIAE_CS42_3AL_TGACv1_196895_AA0663580,TRIAE_CS42_1BS_TGACv1_050930_AA0176780,TRIAE_CS42_1BS_TGACv1_051009_AA0177220,TRIAE_CS42_3AS_TGACv1_212705_AA0702690,TRIAE_CS42_2AL_TGACv1_093234_AA0275660,TRIAE_CS42_5AS_TGACv1_394381_AA1279900,TRIAE_CS4…
GO:0006753	nucleoside phosphate metabolic process	biological_process	1.4527e-24	1.0972e-22	90	2784	690	74606	TRIAE_CS42_2AS_TGACv1_112635_AA0342690,TRIAE_CS42_6AL_TGACv1_473321_AA1530120,TRIAE_CS42_4BS_TGACv1_328687_AA1092120,TRIAE_CS42_6AL_TGACv1_471645_AA1512290,TRIAE_CS42_5DS_TGACv1_457334_AA1485300,TRIAE_CS42_5AL_TGACv1_376570_AA1238560,TRIAE_CS42_4BL_TGACv1_320339_AA1035830,TRIAE_CS42_6BL_TGACv1_499360_AA1579440,TRIAE_CS42_1AL_TGACv1_002865_AA0045670,TRIAE_CS42_7AS_TGACv1_571836_AA1850200,TRIAE_CS4…
GO:0046034	ATP metabolic process	biological_process	1.6479e-24	1.2308e-22	61	2784	329	74606	TRIAE_CS42_1DL_TGACv1_062999_AA0222790,TRIAE_CS42_1BL_TGACv1_030605_AA0095500,TRIAE_CS42_5BS_TGACv1_423965_AA1385430,TRIAE_CS42_7BL_TGACv1_579860_AA1910590,TRIAE_CS42_3B_TGACv1_226284_AA0815680,TRIAE_CS42_1DS_TGACv1_081340_AA0260080,TRIAE_CS42_4BS_TGACv1_330279_AA1106910,TRIAE_CS42_4AL_TGACv1_290300_AA0983760,TRIAE_CS42_2BL_TGACv1_130381_AA0409970,TRIAE_CS42_2AS_TGACv1_112739_AA0344340,TRIAE_CS42…
GO:0071840	cellular component organization or biogenesis	biological_process	2.0001e-24	1.4774e-22	265	2784	3813	74606	TRIAE_CS42_2BS_TGACv1_145994_AA0452220,TRIAE_CS42_2BL_TGACv1_132610_AA0438600,TRIAE_CS42_7BL_TGACv1_576755_AA1853830,TRIAE_CS42_U_TGACv1_643192_AA2128740,TRIAE_CS42_1AS_TGACv1_019520_AA0067630,TRIAE_CS42_5BL_TGACv1_405271_AA1323660,TRIAE_CS42_U_TGACv1_643385_AA2131440,TRIAE_CS42_2DL_TGACv1_158517_AA0520630,TRIAE_CS42_4DS_TGACv1_362497_AA1180110,TRIAE_CS42_4DS_TGACv1_362799_AA1182230,TRIAE_CS42_5B…
GO:0006732	coenzyme metabolic process	biological_process	3.0463e-24	2.2258e-22	75	2784	520	74606	TRIAE_CS42_6BS_TGACv1_513938_AA1652520,TRIAE_CS42_1BL_TGACv1_030654_AA0097000,TRIAE_CS42_1DL_TGACv1_061125_AA0186220,TRIAE_CS42_7BS_TGACv1_592594_AA1941060,TRIAE_CS42_4AL_TGACv1_288604_AA0953590,TRIAE_CS42_3DL_TGACv1_250475_AA0868810,TRIAE_CS42_7DS_TGACv1_624347_AA2060690,TRIAE_CS42_3B_TGACv1_223441_AA0782230,TRIAE_CS42_6AL_TGACv1_471645_AA1512290,TRIAE_CS42_5DS_TGACv1_457334_AA1485300,TRIAE_CS42…
GO:0009132	nucleoside diphosphate metabolic process	biological_process	6.9876e-24	5.0506e-22	46	2784	201	74606	TRIAE_CS42_5DL_TGACv1_434368_AA1434620,TRIAE_CS42_1AL_TGACv1_000755_AA0018450,TRIAE_CS42_1AL_TGACv1_000492_AA0013410,TRIAE_CS42_1DL_TGACv1_061176_AA0187850,TRIAE_CS42_3AL_TGACv1_194635_AA0637160,TRIAE_CS42_7DS_TGACv1_622764_AA2045010,TRIAE_CS42_5AS_TGACv1_393357_AA1271740,TRIAE_CS42_4DS_TGACv1_362522_AA1180350,TRIAE_CS42_3B_TGACv1_226655_AA0818420,TRIAE_CS42_2AS_TGACv1_112739_AA0344340,TRIAE_CS42…
GO:0018298	protein-chromophore linkage	biological_process	2.7556e-23	1.9706e-21	36	2784	106	74606	TRIAE_CS42_7DS_TGACv1_625332_AA2064910,TRIAE_CS42_1BL_TGACv1_030603_AA0095440,TRIAE_CS42_4DS_TGACv1_362641_AA1181180,TRIAE_CS42_6DS_TGACv1_543042_AA1734510,TRIAE_CS42_5BL_TGACv1_404374_AA1297310,TRIAE_CS42_1AL_TGACv1_000383_AA0010660,TRIAE_CS42_1BL_TGACv1_030910_AA0103600,TRIAE_CS42_1AL_TGACv1_009365_AA0055660,TRIAE_CS42_1DL_TGACv1_061593_AA0199390,TRIAE_CS42_5BL_TGACv1_404454_AA1300370,TRIAE_CS4…
GO:0006091	generation of precursor metabolites and energy	biological_process	4.7446e-23	3.3572e-21	130	2784	1176	74606	TRIAE_CS42_3B_TGACv1_226039_AA0813550,TRIAE_CS42_3AS_TGACv1_211132_AA0685780,TRIAE_CS42_1BL_TGACv1_031712_AA0119450,TRIAE_CS42_5BS_TGACv1_423649_AA1381290,TRIAE_CS42_U_TGACv1_643126_AA2127630,TRIAE_CS42_1AL_TGACv1_000734_AA0018070,TRIAE_CS42_7BL_TGACv1_577913_AA1885930,TRIAE_CS42_4AL_TGACv1_291250_AA0993200,TRIAE_CS42_5AL_TGACv1_376570_AA1238560,TRIAE_CS42_5DS_TGACv1_457334_AA1485300,TRIAE_CS42_6…
GO:0009126	purine nucleoside monophosphate metabolic process	biological_process	6.813e-23	4.7214e-21	64	2784	393	74606	TRIAE_CS42_3B_TGACv1_226655_AA0818420,TRIAE_CS42_2AS_TGACv1_112739_AA0344340,TRIAE_CS42_2BL_TGACv1_130381_AA0409970,TRIAE_CS42_5BS_TGACv1_423965_AA1385430,TRIAE_CS42_1DS_TGACv1_081340_AA0260080,TRIAE_CS42_4BS_TGACv1_330279_AA1106910,TRIAE_CS42_1BL_TGACv1_030605_AA0095500,TRIAE_CS42_5DL_TGACv1_434368_AA1434620,TRIAE_CS42_3AL_TGACv1_194635_AA0637160,TRIAE_CS42_7DL_TGACv1_603800_AA1989460,TRIAE_CS42…
GO:0009167	purine ribonucleoside monophosphate metabolic process	biological_process	6.813e-23	4.7214e-21	64	2784	393	74606	TRIAE_CS42_5AS_TGACv1_393357_AA1271740,TRIAE_CS42_4DS_TGACv1_362522_AA1180350,TRIAE_CS42_4DS_TGACv1_361934_AA1174470,TRIAE_CS42_7AL_TGACv1_558464_AA1793580,TRIAE_CS42_1AL_TGACv1_000755_AA0018450,TRIAE_CS42_5BL_TGACv1_406546_AA1346870,TRIAE_CS42_4AL_TGACv1_288275_AA0943380,TRIAE_CS42_1DL_TGACv1_062999_AA0222790,TRIAE_CS42_3B_TGACv1_226284_AA0815680,TRIAE_CS42_7BL_TGACv1_579860_AA1910590,TRIAE_CS42…
GO:0016168	chlorophyll binding	molecular_function	7.0461e-23	4.833e-21	36	2784	104	74606	TRIAE_CS42_1AL_TGACv1_000383_AA0010660,TRIAE_CS42_1BL_TGACv1_030910_AA0103600,TRIAE_CS42_4DS_TGACv1_362641_AA1181180,TRIAE_CS42_5BL_TGACv1_404374_AA1297310,TRIAE_CS42_6DS_TGACv1_543042_AA1734510,TRIAE_CS42_1BL_TGACv1_030603_AA0095440,TRIAE_CS42_7DS_TGACv1_625332_AA2064910,TRIAE_CS42_5DL_TGACv1_434747_AA1440950,TRIAE_CS42_6BS_TGACv1_514208_AA1656990,TRIAE_CS42_1DL_TGACv1_061593_AA0199400,TRIAE_CS4…
GO:0006096	glycolytic process	biological_process	8.7775e-23	5.8418e-21	42	2784	178	74606	TRIAE_CS42_5BL_TGACv1_406279_AA1343630,TRIAE_CS42_2DS_TGACv1_177244_AA0570280,TRIAE_CS42_3DL_TGACv1_250475_AA0868810,TRIAE_CS42_1DL_TGACv1_063603_AA0229020,TRIAE_CS42_2AL_TGACv1_094283_AA0295250,TRIAE_CS42_3B_TGACv1_221609_AA0745810,TRIAE_CS42_3AL_TGACv1_194246_AA0629560,TRIAE_CS42_6BS_TGACv1_513938_AA1652520,TRIAE_CS42_7BS_TGACv1_592594_AA1941060,TRIAE_CS42_4AL_TGACv1_288604_AA0953590,TRIAE_CS42…
GO:0006757	ATP generation from ADP	biological_process	8.7775e-23	5.8418e-21	42	2784	178	74606	TRIAE_CS42_5DL_TGACv1_434368_AA1434620,TRIAE_CS42_1AL_TGACv1_000755_AA0018450,TRIAE_CS42_3AL_TGACv1_194635_AA0637160,TRIAE_CS42_4DS_TGACv1_362522_AA1180350,TRIAE_CS42_5AS_TGACv1_393357_AA1271740,TRIAE_CS42_7DS_TGACv1_622764_AA2045010,TRIAE_CS42_3B_TGACv1_226655_AA0818420,TRIAE_CS42_2AS_TGACv1_112739_AA0344340,TRIAE_CS42_4AL_TGACv1_290300_AA0983760,TRIAE_CS42_5BS_TGACv1_423965_AA1385430,TRIAE_CS42…
GO:0046031	ADP metabolic process	biological_process	8.7775e-23	5.8418e-21	42	2784	178	74606	TRIAE_CS42_5BS_TGACv1_423965_AA1385430,TRIAE_CS42_3B_TGACv1_226284_AA0815680,TRIAE_CS42_4BS_TGACv1_330279_AA1106910,TRIAE_CS42_1DS_TGACv1_081340_AA0260080,TRIAE_CS42_1BL_TGACv1_030605_AA0095500,TRIAE_CS42_1DL_TGACv1_062999_AA0222790,TRIAE_CS42_4AL_TGACv1_290300_AA0983760,TRIAE_CS42_2AS_TGACv1_112739_AA0344340,TRIAE_CS42_3B_TGACv1_226655_AA0818420,TRIAE_CS42_4DS_TGACv1_362522_AA1180350,TRIAE_CS42_…
GO:0044724	single-organism carbohydrate catabolic process	biological_process	9.6252e-23	6.3432e-21	46	2784	218	74606	TRIAE_CS42_3AL_TGACv1_194635_AA0637160,TRIAE_CS42_5AS_TGACv1_393357_AA1271740,TRIAE_CS42_4DS_TGACv1_362522_AA1180350,TRIAE_CS42_2BL_TGACv1_130193_AA0406020,TRIAE_CS42_7DS_TGACv1_622764_AA2045010,TRIAE_CS42_3DL_TGACv1_251020_AA0876220,TRIAE_CS42_5DL_TGACv1_434368_AA1434620,TRIAE_CS42_3B_TGACv1_222141_AA0758150,TRIAE_CS42_1AL_TGACv1_000755_AA0018450,TRIAE_CS42_4AL_TGACv1_290300_AA0983760,TRIAE_CS42…
GO:0097159	organic cyclic compound binding	molecular_function	1.1633e-22	7.519e-21	1079	2784	24199	74606	TRIAE_CS42_6DS_TGACv1_542798_AA1730580,TRIAE_CS42_2AL_TGACv1_093051_AA0270470,TRIAE_CS42_U_TGACv1_642445_AA2117740,TRIAE_CS42_1AL_TGACv1_000755_AA0018450,TRIAE_CS42_4AS_TGACv1_306214_AA1004350,TRIAE_CS42_4DL_TGACv1_342877_AA1124460,TRIAE_CS42_6AS_TGACv1_487522_AA1571220,TRIAE_CS42_3AL_TGACv1_196411_AA0660170,TRIAE_CS42_7BS_TGACv1_591878_AA1924240,TRIAE_CS42_5BL_TGACv1_404916_AA1315030,TRIAE_CS42_…
CS42_5DL_TGACv1_433265_AA1407530,TRIAE_CS42_4DS_TGACv1_362641_AA1181180,TRIAE_CS42_6AS_TGACv1_485977_AA1555130,TRIAE_CS42_1AL_TGACv1_000929_AA0022050,TRIAE_CS42_1DL_TGACv1_064141_AA0232850,TRIAE_CS42_1BL_TGACv1_030590_AA0094940,TRIAE_CS42_4AL_TGACv1_291036_AA0991630,TRIAE_CS42_5AL_TGACv1_374148_AA1191750,TRIAE_CS42_U_TGACv1_641245_AA2089540,TRIAE_CS42_4AS_TGACv1_306795_AA1013510,TRIAE_CS42_7AL_TG…
GO:1901363	heterocyclic compound binding	molecular_function	1.1633e-22	7.519e-21	1079	2784	24199	74606	TRIAE_CS42_4BL_TGACv1_320923_AA1051800,TRIAE_CS42_6DS_TGACv1_543529_AA1741250,TRIAE_CS42_4AL_TGACv1_290500_AA0986100,TRIAE_CS42_2DL_TGACv1_159040_AA0531140,TRIAE_CS42_4BL_TGACv1_321170_AA1056520,TRIAE_CS42_1DL_TGACv1_062576_AA0216780,TRIAE_CS42_2BL_TGACv1_131580_AA0429350,TRIAE_CS42_3B_TGACv1_221292_AA0736410,TRIAE_CS42_6BL_TGACv1_501956_AA1621950,TRIAE_CS42_6BL_TGACv1_499410_AA1581870,TRIAE_CS42…
A0911510,TRIAE_CS42_4AS_TGACv1_306509_AA1009420,TRIAE_CS42_3AL_TGACv1_196805_AA0663010,TRIAE_CS42_3DL_TGACv1_250081_AA0861870,TRIAE_CS42_2DS_TGACv1_177139_AA0566230,TRIAE_CS42_1AS_TGACv1_019041_AA0058780,TRIAE_CS42_6AS_TGACv1_485824_AA1552850,TRIAE_CS42_2AL_TGACv1_094809_AA0303420,TRIAE_CS42_6DL_TGACv1_526456_AA1684240,TRIAE_CS42_6AS_TGACv1_486079_AA1556510,TRIAE_CS42_3AL_TGACv1_195978_AA0656110,…
GO:0009135	purine nucleoside diphosphate metabolic process	biological_process	3.6777e-22	2.3104e-20	42	2784	184	74606	TRIAE_CS42_3DS_TGACv1_271475_AA0899660,TRIAE_CS42_5DL_TGACv1_433836_AA1423410,TRIAE_CS42_4AL_TGACv1_288604_AA0953590,TRIAE_CS42_7BS_TGACv1_592594_AA1941060,TRIAE_CS42_6BS_TGACv1_513938_AA1652520,TRIAE_CS42_3AL_TGACv1_194246_AA0629560,TRIAE_CS42_1DL_TGACv1_063603_AA0229020,TRIAE_CS42_2AL_TGACv1_094283_AA0295250,TRIAE_CS42_3B_TGACv1_221609_AA0745810,TRIAE_CS42_5BL_TGACv1_406279_AA1343630,TRIAE_CS42…
GO:0009179	purine ribonucleoside diphosphate metabolic process	biological_process	3.6777e-22	2.3104e-20	42	2784	184	74606	TRIAE_CS42_5DL_TGACv1_433836_AA1423410,TRIAE_CS42_3DS_TGACv1_271475_AA0899660,TRIAE_CS42_7BS_TGACv1_592594_AA1941060,TRIAE_CS42_4AL_TGACv1_288604_AA0953590,TRIAE_CS42_6BS_TGACv1_513938_AA1652520,TRIAE_CS42_3AL_TGACv1_194246_AA0629560,TRIAE_CS42_2AL_TGACv1_094283_AA0295250,TRIAE_CS42_1DL_TGACv1_063603_AA0229020,TRIAE_CS42_3B_TGACv1_221609_AA0745810,TRIAE_CS42_5BL_TGACv1_406279_AA1343630,TRIAE_CS42…
GO:0009185	ribonucleoside diphosphate metabolic process	biological_process	3.6777e-22	2.3104e-20	42	2784	184	74606	TRIAE_CS42_5AL_TGACv1_376570_AA1238560,TRIAE_CS42_6AL_TGACv1_471645_AA1512290,TRIAE_CS42_5DS_TGACv1_457334_AA1485300,TRIAE_CS42_3DL_TGACv1_251713_AA0884060,TRIAE_CS42_3AL_TGACv1_196429_AA0660330,TRIAE_CS42_4BS_TGACv1_328687_AA1092120,TRIAE_CS42_5AS_TGACv1_394202_AA1278730,TRIAE_CS42_2DL_TGACv1_159793_AA0542880,TRIAE_CS42_3B_TGACv1_226039_AA0813550,TRIAE_CS42_7AS_TGACv1_570937_AA1842720,TRIAE_CS42…
GO:0009161	ribonucleoside monophosphate metabolic process	biological_process	9.5185e-22	5.9244e-20	64	2784	414	74606	TRIAE_CS42_3AL_TGACv1_194635_AA0637160,TRIAE_CS42_7DS_TGACv1_622764_AA2045010,TRIAE_CS42_7DL_TGACv1_603800_AA1989460,TRIAE_CS42_2AL_TGACv1_095324_AA0309650,TRIAE_CS42_5DL_TGACv1_434368_AA1434620,TRIAE_CS42_2BL_TGACv1_130381_AA0409970,TRIAE_CS42_1BL_TGACv1_030605_AA0095500,TRIAE_CS42_1DS_TGACv1_081340_AA0260080,TRIAE_CS42_4BS_TGACv1_330279_AA1106910,TRIAE_CS42_5BS_TGACv1_423965_AA1385430,TRIAE_CS4…
GO:0009123	nucleoside monophosphate metabolic process	biological_process	1.7332e-21	1.0689e-19	64	2784	419	74606	TRIAE_CS42_1AL_TGACv1_000051_AA0001340,TRIAE_CS42_1DL_TGACv1_063603_AA0229020,TRIAE_CS42_2AL_TGACv1_094283_AA0295250,TRIAE_CS42_3B_TGACv1_221609_AA0745810,TRIAE_CS42_1AL_TGACv1_002629_AA0043900,AIG90477,TRIAE_CS42_5BL_TGACv1_406279_AA1343630,TRIAE_CS42_7AL_TGACv1_558294_AA1792080,TRIAE_CS42_2DS_TGACv1_177244_AA0570280,TRIAE_CS42_5DL_TGACv1_433836_AA1423410,TRIAE_CS42_3DS_TGACv1_271475_AA0899660,T…
GO:1901135	carbohydrate derivative metabolic process	biological_process	2.875e-21	1.7569e-19	122	2784	1293	74606	TRIAE_CS42_5DL_TGACv1_434368_AA1434620,TRIAE_CS42_7AL_TGACv1_558796_AA1796130,TRIAE_CS42_6DL_TGACv1_528171_AA1712170,TRIAE_CS42_7BS_TGACv1_592783_AA1944260,TRIAE_CS42_1DL_TGACv1_061176_AA0187850,TRIAE_CS42_3AL_TGACv1_194635_AA0637160,TRIAE_CS42_7DS_TGACv1_622764_AA2045010,TRIAE_CS42_2AL_TGACv1_095324_AA0309650,TRIAE_CS42_5DL_TGACv1_433855_AA1423770,TRIAE_CS42_7DL_TGACv1_603800_AA1989460,TRIAE_CS4…
GO:0016616	oxidoreductase activity, acting on the CH-OH group of donors, NAD or NADP as acceptor	molecular_function	4.5192e-21	2.7367e-19	52	2784	299	74606	TRIAE_CS42_1BS_TGACv1_049382_AA0151460,TRIAE_CS42_1DL_TGACv1_062583_AA0216850,TRIAE_CS42_6DL_TGACv1_527365_AA1702830,TRIAE_CS42_U_TGACv1_645225_AA2143600,TRIAE_CS42_3AS_TGACv1_210457_AA0672630,TRIAE_CS42_6DL_TGACv1_528145_AA1711960,TRIAE_CS42_2BL_TGACv1_129465_AA0384880,TRIAE_CS42_2BL_TGACv1_129772_AA0395390,TRIAE_CS42_5AL_TGACv1_375282_AA1219100,TRIAE_CS42_5BL_TGACv1_404418_AA1299220,TRIAE_CS42_…
GO:0006260	DNA replication	biological_process	7.9472e-21	4.7698e-19	49	2784	283	74606	TRIAE_CS42_U_TGACv1_643292_AA2130280,TRIAE_CS42_6AL_TGACv1_470886_AA1497620,TRIAE_CS42_4DL_TGACv1_342972_AA1126540,TRIAE_CS42_5AS_TGACv1_393478_AA1272980,TRIAE_CS42_6DL_TGACv1_527835_AA1709090,TRIAE_CS42_7AL_TGACv1_560236_AA1801950,TRIAE_CS42_3B_TGACv1_221965_AA0753990,TRIAE_CS42_6DL_TGACv1_526389_AA1681790,TRIAE_CS42_6DL_TGACv1_526369_AA1681040,TRIAE_CS42_U_TGACv1_641839_AA2105360,TRIAE_CS42_5BL…
GO:0098805	whole membrane	cellular_component	8.1358e-21	4.8397e-19	72	2784	551	74606	TRIAE_CS42_3B_TGACv1_222757_AA0770040,TRIAE_CS42_4DL_TGACv1_343812_AA1140000,TRIAE_CS42_3AL_TGACv1_194730_AA0638300,TRIAE_CS42_3DL_TGACv1_250988_AA0875910,TRIAE_CS42_3DS_TGACv1_272832_AA0925630,TRIAE_CS42_3DL_TGACv1_250864_AA0874390,TRIAE_CS42_U_TGACv1_641043_AA2083140,TRIAE_CS42_4DS_TGACv1_361383_AA1166600,TRIAE_CS42_4AS_TGACv1_307078_AA1016740,TRIAE_CS42_4DL_TGACv1_342471_AA1114460,TRIAE_CS42_3…
GO:0098796	membrane protein complex	cellular_component	9.5734e-21	5.6449e-19	100	2784	833	74606	TRIAE_CS42_7BS_TGACv1_592029_AA1928690,TRIAE_CS42_1AL_TGACv1_000051_AA0001340,TRIAE_CS42_7AL_TGACv1_558294_AA1792080,TRIAE_CS42_3AL_TGACv1_194690_AA0637900,TRIAE_CS42_3AL_TGACv1_195562_AA0651220,TRIAE_CS42_1AL_TGACv1_002629_AA0043900,TRIAE_CS42_7AS_TGACv1_571321_AA1846800,TRIAE_CS42_6AS_TGACv1_485824_AA1552850,TRIAE_CS42_6BS_TGACv1_514088_AA1654890,TRIAE_CS42_4DS_TGACv1_362497_AA1180110,TRIAE_CS4…
GO:0044255	cellular lipid metabolic process	biological_process	1.1329e-20	6.622e-19	106	2784	1115	74606	TRIAE_CS42_3DL_TGACv1_251216_AA0878910,TRIAE_CS42_3B_TGACv1_221027_AA0727340,TRIAE_CS42_5AL_TGACv1_376572_AA1238630,TRIAE_CS42_1AL_TGACv1_000132_AA0004290,TRIAE_CS42_5BL_TGACv1_404367_AA1297090,TRIAE_CS42_5AL_TGACv1_376704_AA1240110,TRIAE_CS42_6BL_TGACv1_499968_AA1596160,TRIAE_CS42_1DL_TGACv1_063673_AA0229730,TRIAE_CS42_4AS_TGACv1_307361_AA1019860,TRIAE_CS42_3AS_TGACv1_211082_AA0684760,TRIAE_CS42…
GO:0008610	lipid biosynthetic process	biological_process	1.5217e-20	8.8181e-19	93	2784	876	74606	TRIAE_CS42_4DS_TGACv1_361422_AA1167650,TRIAE_CS42_6AS_TGACv1_485260_AA1541800,TRIAE_CS42_7AS_TGACv1_572202_AA1851680,TRIAE_CS42_4DL_TGACv1_343724_AA1138650,TRIAE_CS42_7BS_TGACv1_593415_AA1951220,TRIAE_CS42_1DL_TGACv1_063094_AA0223830,TRIAE_CS42_1BL_TGACv1_030654_AA0097000,TRIAE_CS42_3AL_TGACv1_196405_AA0660080,TRIAE_CS42_U_TGACv1_643776_AA2134960,TRIAE_CS42_1AL_TGACv1_003920_AA0051930,TRIAE_CS42_…
GO:0017111	nucleoside-triphosphatase activity	molecular_function	1.9162e-20	1.1009e-18	134	2784	1777	74606	TRIAE_CS42_7AS_TGACv1_569469_AA1816750,TRIAE_CS42_5DL_TGACv1_434221_AA1432010,TRIAE_CS42_4BS_TGACv1_327981_AA1080370,TRIAE_CS42_3DL_TGACv1_252076_AA0887540,TRIAE_CS42_7DL_TGACv1_603800_AA1989460,TRIAE_CS42_4DL_TGACv1_343153_AA1130690,TRIAE_CS42_2DS_TGACv1_179778_AA0609130,TRIAE_CS42_7AL_TGACv1_559344_AA1799200,TRIAE_CS42_1BL_TGACv1_030590_AA0094940,TRIAE_CS42_7DS_TGACv1_622168_AA2034390,TRIAE_CS4…
GO:0009522	photosystem I	cellular_component	6.9508e-20	3.9596e-18	37	2784	127	74606	TRIAE_CS42_1BL_TGACv1_030910_AA0103600,TRIAE_CS42_1AL_TGACv1_000383_AA0010660,TRIAE_CS42_6DS_TGACv1_543042_AA1734510,TRIAE_CS42_5BL_TGACv1_404374_AA1297310,TRIAE_CS42_4DS_TGACv1_362641_AA1181180,TRIAE_CS42_1BL_TGACv1_030603_AA0095440,TRIAE_CS42_7DS_TGACv1_625332_AA2064910,TRIAE_CS42_5DL_TGACv1_434747_AA1440950,TRIAE_CS42_6BS_TGACv1_514208_AA1656990,TRIAE_CS42_5AL_TGACv1_378876_AA1254920,TRIAE_CS4…
GO:0009534	chloroplast thylakoid	cellular_component	2.3015e-19	1.2892e-17	75	2784	523	74606	TRIAE_CS42_4AS_TGACv1_306966_AA1015580,TRIAE_CS42_1AL_TGACv1_000383_AA0010660,TRIAE_CS42_6DS_TGACv1_543042_AA1734510,TRIAE_CS42_5BL_TGACv1_404374_AA1297310,TRIAE_CS42_4DS_TGACv1_362641_AA1181180,TRIAE_CS42_2DL_TGACv1_160210_AA0548190,TRIAE_CS42_1BL_TGACv1_030603_AA0095440,TRIAE_CS42_2BL_TGACv1_130381_AA0409970,TRIAE_CS42_7AL_TGACv1_557134_AA1777250,TRIAE_CS42_2DS_TGACv1_177169_AA0567350,TRIAE_CS4…
GO:0031976	plastid thylakoid	cellular_component	2.3015e-19	1.2892e-17	75	2784	523	74606	TRIAE_CS42_2BL_TGACv1_130381_AA0409970,TRIAE_CS42_7AL_TGACv1_557134_AA1777250,TRIAE_CS42_2DL_TGACv1_160210_AA0548190,TRIAE_CS42_1BL_TGACv1_030603_AA0095440,TRIAE_CS42_6DS_TGACv1_543042_AA1734510,TRIAE_CS42_5BL_TGACv1_404374_AA1297310,TRIAE_CS42_4DS_TGACv1_362641_AA1181180,TRIAE_CS42_1AL_TGACv1_000383_AA0010660,TRIAE_CS42_4AS_TGACv1_306966_AA1015580,TRIAE_CS42_5BL_TGACv1_404454_AA1300370,TRIAE_CS4…
GO:0009532	plastid stroma	cellular_component	4.6065e-19	2.5591e-17	72	2784	571	74606	TRIAE_CS42_4AS_TGACv1_306673_AA1011900,TRIAE_CS42_1BL_TGACv1_030605_AA0095500,TRIAE_CS42_4AL_TGACv1_289727_AA0976030,TRIAE_CS42_2DL_TGACv1_162716_AA0563420,TRIAE_CS42_7AL_TGACv1_557134_AA1777250,TRIAE_CS42_7DS_TGACv1_622168_AA2034390,TRIAE_CS42_2AS_TGACv1_112739_AA0344340,TRIAE_CS42_U_TGACv1_641465_AA2095880,TRIAE_CS42_2AS_TGACv1_113349_AA0354840,TRIAE_CS42_U_TGACv1_643054_AA2126680,TRIAE_CS42_2A…
GO:0016818	hydrolase activity, acting on acid anhydrides, in phosphorus-containing anhydrides	molecular_function	5.2606e-19	2.8985e-17	137	2784	1886	74606	TRIAE_CS42_2DL_TGACv1_160329_AA0549350,TRIAE_CS42_2AS_TGACv1_112651_AA0342920,TRIAE_CS42_6BS_TGACv1_515450_AA1670200,TRIAE_CS42_6DS_TGACv1_542672_AA1727030,TRIAE_CS42_2DL_TGACv1_158390_AA0517350,TRIAE_CS42_5AL_TGACv1_374243_AA1194880,TRIAE_CS42_4DS_TGACv1_361934_AA1174490,TRIAE_CS42_5BL_TGACv1_406442_AA1345570,TRIAE_CS42_3DS_TGACv1_271947_AA0911510,TRIAE_CS42_2BL_TGACv1_129973_AA0400750,TRIAE_CS4…
GO:0009570	chloroplast stroma	cellular_component	9.3035e-19	5.0844e-17	70	2784	549	74606	TRIAE_CS42_6DS_TGACv1_544208_AA1747240,TRIAE_CS42_U_TGACv1_644128_AA2137410,TRIAE_CS42_2DS_TGACv1_179678_AA0608530,TRIAE_CS42_2BL_TGACv1_129772_AA0395390,TRIAE_CS42_2AL_TGACv1_095862_AA0315240,TRIAE_CS42_2BS_TGACv1_146384_AA0464010,TRIAE_CS42_4AL_TGACv1_290051_AA0980910,TRIAE_CS42_2DS_TGACv1_177169_AA0567350,TRIAE_CS42_5DL_TGACv1_433626_AA1417990,TRIAE_CS42_7DS_TGACv1_622168_AA2034390,TRIAE_CS42_…
GO:0046496	nicotinamide nucleotide metabolic process	biological_process	1.0176e-18	5.5161e-17	47	2784	280	74606	TRIAE_CS42_3B_TGACv1_221609_AA0745810,TRIAE_CS42_2AL_TGACv1_094283_AA0295250,TRIAE_CS42_1DL_TGACv1_063603_AA0229020,TRIAE_CS42_3DL_TGACv1_250475_AA0868810,TRIAE_CS42_2DS_TGACv1_177244_AA0570280,TRIAE_CS42_7DS_TGACv1_624347_AA2060690,TRIAE_CS42_5BL_TGACv1_406279_AA1343630,TRIAE_CS42_7BS_TGACv1_592594_AA1941060,TRIAE_CS42_4AL_TGACv1_288604_AA0953590,TRIAE_CS42_3DS_TGACv1_271475_AA0899660,TRIAE_CS42…
GO:0016462	pyrophosphatase activity	molecular_function	1.0391e-18	5.588e-17	135	2784	1862	74606	TRIAE_CS42_1DL_TGACv1_063247_AA0225510,TRIAE_CS42_4AS_TGACv1_307131_AA1017430,TRIAE_CS42_1AL_TGACv1_004697_AA0054030,TRIAE_CS42_3B_TGACv1_223754_AA0786670,TRIAE_CS42_1BL_TGACv1_031835_AA0121450,TRIAE_CS42_3B_TGACv1_221031_AA0727440,TRIAE_CS42_1AL_TGACv1_001070_AA0024450,TRIAE_CS42_5AS_TGACv1_393478_AA1272980,TRIAE_CS42_6DS_TGACv1_543898_AA1745090,TRIAE_CS42_1AL_TGACv1_004040_AA0052320,TRIAE_CS42_…
GO:0019362	pyridine nucleotide metabolic process	biological_process	1.681e-18	8.9682e-17	47	2784	283	74606	TRIAE_CS42_5AS_TGACv1_394202_AA1278730,TRIAE_CS42_7AS_TGACv1_570937_AA1842720,TRIAE_CS42_2DL_TGACv1_159793_AA0542880,TRIAE_CS42_3B_TGACv1_226039_AA0813550,TRIAE_CS42_1AL_TGACv1_002865_AA0045670,TRIAE_CS42_7AS_TGACv1_571836_AA1850200,TRIAE_CS42_5BS_TGACv1_423649_AA1381290,TRIAE_CS42_3DL_TGACv1_251216_AA0878910,TRIAE_CS42_6AS_TGACv1_486236_AA1558630,TRIAE_CS42_5DS_TGACv1_457334_AA1485300,TRIAE_CS42…
GO:0016817	hydrolase activity, acting on acid anhydrides	molecular_function	1.6957e-18	8.975e-17	137	2784	1910	74606	TRIAE_CS42_5DL_TGACv1_434221_AA1432010,TRIAE_CS42_7AS_TGACv1_569469_AA1816750,TRIAE_CS42_7DL_TGACv1_603800_AA1989460,TRIAE_CS42_4BS_TGACv1_327981_AA1080370,TRIAE_CS42_3DL_TGACv1_252076_AA0887540,TRIAE_CS42_7AL_TGACv1_559344_AA1799200,TRIAE_CS42_1BL_TGACv1_030590_AA0094940,TRIAE_CS42_4DL_TGACv1_343153_AA1130690,TRIAE_CS42_2DS_TGACv1_179778_AA0609130,TRIAE_CS42_5AL_TGACv1_375755_AA1226710,TRIAE_CS4…
GO:0006733	oxidoreduction coenzyme metabolic process	biological_process	2.3045e-18	1.2102e-16	49	2784	308	74606	TRIAE_CS42_5AL_TGACv1_376570_AA1238560,TRIAE_CS42_7AS_TGACv1_571112_AA1844780,TRIAE_CS42_6AL_TGACv1_471645_AA1512290,TRIAE_CS42_5DS_TGACv1_457334_AA1485300,TRIAE_CS42_3AL_TGACv1_196429_AA0660330,TRIAE_CS42_4BS_TGACv1_328687_AA1092120,TRIAE_CS42_2BS_TGACv1_145925_AA0449700,TRIAE_CS42_3DL_TGACv1_251713_AA0884060,TRIAE_CS42_2AS_TGACv1_112635_AA0342690,TRIAE_CS42_3B_TGACv1_226039_AA0813550,TRIAE_CS42…
GO:0031967	organelle envelope	cellular_component	7.6284e-18	3.975e-16	95	2784	879	74606	TRIAE_CS42_3AL_TGACv1_197079_AA0664730,TRIAE_CS42_5DL_TGACv1_438081_AA1467900,TRIAE_CS42_5AL_TGACv1_378731_AA1254390,TRIAE_CS42_6AS_TGACv1_486557_AA1562630,TRIAE_CS42_2DL_TGACv1_159102_AA0532400,TRIAE_CS42_3DL_TGACv1_249504_AA0850210,TRIAE_CS42_4BS_TGACv1_328196_AA1084480,TRIAE_CS42_2DL_TGACv1_160210_AA0548190,TRIAE_CS42_5AS_TGACv1_393382_AA1272050,TRIAE_CS42_7AL_TGACv1_557134_AA1777250,TRIAE_CS4…
GO:0031975	envelope	cellular_component	9.2596e-18	4.7879e-16	95	2784	882	74606	TRIAE_CS42_3B_TGACv1_223093_AA0776380,TRIAE_CS42_3AL_TGACv1_194629_AA0637020,TRIAE_CS42_7BS_TGACv1_592287_AA1935030,TRIAE_CS42_4DS_TGACv1_361934_AA1174470,TRIAE_CS42_2AL_TGACv1_094127_AA0292960,TRIAE_CS42_1DL_TGACv1_062818_AA0220440,TRIAE_CS42_7DS_TGACv1_621370_AA2013200,TRIAE_CS42_3AS_TGACv1_210696_AA0677310,TRIAE_CS42_4AL_TGACv1_288275_AA0943380,TRIAE_CS42_2BS_TGACv1_148429_AA0492770,TRIAE_CS42…
GO:0042651	thylakoid membrane	cellular_component	1.878e-17	9.6368e-16	74	2784	547	74606	TRIAE_CS42_1BL_TGACv1_033509_AA0140020,TRIAE_CS42_7AS_TGACv1_569064_AA1806110,TRIAE_CS42_1DL_TGACv1_061593_AA0199390,TRIAE_CS42_6BL_TGACv1_500431_AA1604410,TRIAE_CS42_7DS_TGACv1_621370_AA2013200,TRIAE_CS42_1DL_TGACv1_061593_AA0199400,TRIAE_CS42_3AL_TGACv1_194787_AA0639510,TRIAE_CS42_3DL_TGACv1_249227_AA0842370,TRIAE_CS42_7DS_TGACv1_625332_AA2064910,TRIAE_CS42_6DL_TGACv1_526515_AA1685910,TRIAE_CS4…
GO:0016053	organic acid biosynthetic process	biological_process	2.0824e-17	1.0525e-15	87	2784	873	74606	TRIAE_CS42_5BL_TGACv1_404481_AA1301440,TRIAE_CS42_U_TGACv1_641465_AA2095880,TRIAE_CS42_4AL_TGACv1_290117_AA0981910,TRIAE_CS42_4BL_TGACv1_322099_AA1068530,TRIAE_CS42_5BL_TGACv1_404165_AA1287780,TRIAE_CS42_2DL_TGACv1_160628_AA0552420,TRIAE_CS42_5AL_TGACv1_374394_AA1198750,TRIAE_CS42_4BS_TGACv1_330819_AA1108930,TRIAE_CS42_7BL_TGACv1_580117_AA1912080,TRIAE_CS42_1AL_TGACv1_000254_AA0007370,TRIAE_CS42_…
GO:0046394	carboxylic acid biosynthetic process	biological_process	2.0824e-17	1.0525e-15	87	2784	873	74606	TRIAE_CS42_5AL_TGACv1_376572_AA1238630,TRIAE_CS42_1AL_TGACv1_000132_AA0004290,TRIAE_CS42_3DL_TGACv1_251216_AA0878910,TRIAE_CS42_4AS_TGACv1_307728_AA1023060,TRIAE_CS42_U_TGACv1_644014_AA2136450,TRIAE_CS42_2BL_TGACv1_131224_AA0424610,TRIAE_CS42_7AL_TGACv1_557898_AA1787490,TRIAE_CS42_2AL_TGACv1_094077_AA0292210,TRIAE_CS42_U_TGACv1_654540_AA2150720,TRIAE_CS42_4DL_TGACv1_343985_AA1142210,TRIAE_CS42_4D…
GO:0009535	chloroplast thylakoid membrane	cellular_component	2.548e-17	1.2687e-15	67	2784	463	74606	TRIAE_CS42_5AL_TGACv1_378876_AA1254920,TRIAE_CS42_2AL_TGACv1_095324_AA0309650,TRIAE_CS42_1DS_TGACv1_082951_AA0265140,TRIAE_CS42_5AL_TGACv1_379174_AA1255680,TRIAE_CS42_5BL_TGACv1_404454_AA1300370,TRIAE_CS42_1AL_TGACv1_009365_AA0055660,TRIAE_CS42_2DS_TGACv1_177169_AA0567350,TRIAE_CS42_6BS_TGACv1_514208_AA1656990,TRIAE_CS42_5DL_TGACv1_434747_AA1440950,TRIAE_CS42_4AL_TGACv1_290051_AA0980910,TRIAE_CS4…
GO:0055035	plastid thylakoid membrane	cellular_component	2.548e-17	1.2687e-15	67	2784	463	74606	TRIAE_CS42_5BL_TGACv1_408485_AA1363480,TRIAE_CS42_5BL_TGACv1_404454_AA1300300,TRIAE_CS42_5DL_TGACv1_437406_AA1466150,TRIAE_CS42_5DL_TGACv1_433611_AA1417610,TRIAE_CS42_6AS_TGACv1_485824_AA1552860,TRIAE_CS42_3DS_TGACv1_272293_AA0918520,AIG90478,TRIAE_CS42_2DL_TGACv1_158421_AA0518370,TRIAE_CS42_1DL_TGACv1_062737_AA0219050,TRIAE_CS42_6BS_TGACv1_514208_AA1656950,TRIAE_CS42_7BS_TGACv1_592029_AA1928680,…
GO:0072524	pyridine-containing compound metabolic process	biological_process	2.6573e-17	1.3134e-15	47	2784	302	74606	TRIAE_CS42_5AS_TGACv1_394202_AA1278730,TRIAE_CS42_7AS_TGACv1_570937_AA1842720,TRIAE_CS42_2DL_TGACv1_159793_AA0542880,TRIAE_CS42_3B_TGACv1_226039_AA0813550,TRIAE_CS42_7AS_TGACv1_571836_AA1850200,TRIAE_CS42_1AL_TGACv1_002865_AA0045670,TRIAE_CS42_5BS_TGACv1_423649_AA1381290,TRIAE_CS42_3DL_TGACv1_251216_AA0878910,TRIAE_CS42_6AS_TGACv1_486236_AA1558630,TRIAE_CS42_6AL_TGACv1_471645_AA1512290,TRIAE_CS42…
GO:0031090	organelle membrane	cellular_component	2.8755e-17	1.4109e-15	125	2784	1452	74606	TRIAE_CS42_3AL_TGACv1_197079_AA0664730,TRIAE_CS42_5AL_TGACv1_378731_AA1254390,TRIAE_CS42_1BL_TGACv1_031076_AA0107250,TRIAE_CS42_6AS_TGACv1_486557_AA1562630,TRIAE_CS42_5DL_TGACv1_436184_AA1459030,TRIAE_CS42_7AL_TGACv1_558055_AA1789640,TRIAE_CS42_2DL_TGACv1_158815_AA0526570,TRIAE_CS42_6AS_TGACv1_486272_AA1559050,TRIAE_CS42_4BS_TGACv1_328196_AA1084480,TRIAE_CS42_3B_TGACv1_225154_AA0805530,TRIAE_CS42…
GO:0048037	cofactor binding	molecular_function	8.2421e-17	4.0147e-15	122	2784	1508	74606	TRIAE_CS42_U_TGACv1_645225_AA2143600,TRIAE_CS42_3AS_TGACv1_210457_AA0672630,TRIAE_CS42_1BS_TGACv1_050930_AA0176780,TRIAE_CS42_6AS_TGACv1_486190_AA1557980,TRIAE_CS42_1DL_TGACv1_062583_AA0216850,TRIAE_CS42_1DL_TGACv1_062249_AA0211290,TRIAE_CS42_1BS_TGACv1_049382_AA0151460,TRIAE_CS42_5BS_TGACv1_423320_AA1374210,TRIAE_CS42_5BL_TGACv1_404916_AA1315030,TRIAE_CS42_6DL_TGACv1_527365_AA1702830,TRIAE_CS42_…
GO:0051287	NAD binding	molecular_function	1.1065e-16	5.351e-15	37	2784	196	74606	TRIAE_CS42_U_TGACv1_645225_AA2143600,TRIAE_CS42_1BS_TGACv1_049382_AA0151460,TRIAE_CS42_1DL_TGACv1_062249_AA0211290,TRIAE_CS42_1DL_TGACv1_062583_AA0216850,TRIAE_CS42_5AL_TGACv1_375282_AA1219100,TRIAE_CS42_7AS_TGACv1_571185_AA1845550,TRIAE_CS42_5BL_TGACv1_404418_AA1299220,TRIAE_CS42_4DS_TGACv1_361591_AA1170510,TRIAE_CS42_6AL_TGACv1_473088_AA1528560,TRIAE_CS42_2BL_TGACv1_129465_AA0384880,TRIAE_CS42_…
GO:0031984	organelle subcompartment	cellular_component	2.0871e-16	1.0021e-14	79	2784	677	74606	TRIAE_CS42_5DL_TGACv1_433321_AA1409630,TRIAE_CS42_4AL_TGACv1_291250_AA0993200,TRIAE_CS42_1BS_TGACv1_050006_AA0165760,TRIAE_CS42_5BL_TGACv1_405241_AA1323080,TRIAE_CS42_7BS_TGACv1_592029_AA1928680,TRIAE_CS42_5AL_TGACv1_375138_AA1216740,TRIAE_CS42_6AL_TGACv1_472556_AA1523550,TRIAE_CS42_3AS_TGACv1_210574_AA0675360,TRIAE_CS42_U_TGACv1_643126_AA2127630,TRIAE_CS42_6AS_TGACv1_485824_AA1552860,TRIAE_CS42_…
GO:0019684	photosynthesis, light reaction	biological_process	3.5216e-16	1.6789e-14	42	2784	213	74606	TRIAE_CS42_6BS_TGACv1_514208_AA1656990,TRIAE_CS42_5DL_TGACv1_434747_AA1440950,TRIAE_CS42_2AL_TGACv1_096183_AA0317660,TRIAE_CS42_5AL_TGACv1_378876_AA1254920,TRIAE_CS42_1DL_TGACv1_061593_AA0199400,TRIAE_CS42_1BL_TGACv1_033509_AA0140020,TRIAE_CS42_7AS_TGACv1_569064_AA1806110,TRIAE_CS42_5BL_TGACv1_404454_AA1300370,TRIAE_CS42_1AL_TGACv1_009365_AA0055660,TRIAE_CS42_1DL_TGACv1_061593_AA0199390,TRIAE_CS4…
GO:0044723	single-organism carbohydrate metabolic process	biological_process	4.5788e-16	2.1675e-14	108	2784	1358	74606	TRIAE_CS42_4BS_TGACv1_329796_AA1104090,TRIAE_CS42_1AL_TGACv1_000384_AA0010710,TRIAE_CS42_2AS_TGACv1_113522_AA0357250,TRIAE_CS42_3DL_TGACv1_250475_AA0868810,TRIAE_CS42_7DS_TGACv1_624347_AA2060690,TRIAE_CS42_2AS_TGACv1_112747_AA0344470,TRIAE_CS42_2DS_TGACv1_177436_AA0577070,TRIAE_CS42_6BS_TGACv1_513938_AA1652520,TRIAE_CS42_4AL_TGACv1_288528_AA0951160,TRIAE_CS42_2DL_TGACv1_160680_AA0553060,TRIAE_CS4…
GO:0004743	pyruvate kinase activity	molecular_function	6.6876e-16	3.1003e-14	16	2784	31	74606	TRIAE_CS42_3B_TGACv1_226655_AA0818420,TRIAE_CS42_4BS_TGACv1_328687_AA1092120,TRIAE_CS42_2AS_TGACv1_112739_AA0344340,TRIAE_CS42_3B_TGACv1_226039_AA0813550,TRIAE_CS42_2DL_TGACv1_159793_AA0542880,TRIAE_CS42_4BS_TGACv1_330279_AA1106910,TRIAE_CS42_3DL_TGACv1_251216_AA0878910,TRIAE_CS42_1AL_TGACv1_002865_AA0045670,TRIAE_CS42_1BL_TGACv1_030605_AA0095500,TRIAE_CS42_1DL_TGACv1_062999_AA0222790,TRIAE_CS42_…
GO:0030955	potassium ion binding	molecular_function	6.6876e-16	3.1003e-14	16	2784	31	74606	TRIAE_CS42_3B_TGACv1_226655_AA0818420,TRIAE_CS42_2AS_TGACv1_112739_AA0344340,TRIAE_CS42_4BS_TGACv1_328687_AA1092120,TRIAE_CS42_2DL_TGACv1_159793_AA0542880,TRIAE_CS42_3B_TGACv1_226039_AA0813550,TRIAE_CS42_1DL_TGACv1_062999_AA0222790,TRIAE_CS42_1BL_TGACv1_030605_AA0095500,TRIAE_CS42_1AL_TGACv1_002865_AA0045670,TRIAE_CS42_4BS_TGACv1_330279_AA1106910,TRIAE_CS42_3DL_TGACv1_251216_AA0878910,TRIAE_CS42_…
GO:0031420	alkali metal ion binding	molecular_function	6.6876e-16	3.1003e-14	16	2784	31	74606	TRIAE_CS42_3B_TGACv1_226655_AA0818420,TRIAE_CS42_2AS_TGACv1_112739_AA0344340,TRIAE_CS42_4BS_TGACv1_328687_AA1092120,TRIAE_CS42_2DL_TGACv1_159793_AA0542880,TRIAE_CS42_3B_TGACv1_226039_AA0813550,TRIAE_CS42_1AL_TGACv1_002865_AA0045670,TRIAE_CS42_1BL_TGACv1_030605_AA0095500,TRIAE_CS42_1DL_TGACv1_062999_AA0222790,TRIAE_CS42_4BS_TGACv1_330279_AA1106910,TRIAE_CS42_3DL_TGACv1_251216_AA0878910,TRIAE_CS42_…
GO:0006629	lipid metabolic process	biological_process	7.1324e-16	3.2838e-14	132	2784	1776	74606	TRIAE_CS42_3B_TGACv1_221027_AA0727340,TRIAE_CS42_2AL_TGACv1_093571_AA0282760,TRIAE_CS42_5AL_TGACv1_376572_AA1238630,TRIAE_CS42_5AL_TGACv1_376704_AA1240110,TRIAE_CS42_3AS_TGACv1_211082_AA0684760,TRIAE_CS42_U_TGACv1_644014_AA2136450,TRIAE_CS42_4DS_TGACv1_361391_AA1166860,TRIAE_CS42_7BS_TGACv1_592341_AA1936030,TRIAE_CS42_5AL_TGACv1_374480_AA1201250,TRIAE_CS42_2BL_TGACv1_131580_AA0429370,TRIAE_CS42_3…
GO:0005198	structural molecule activity	molecular_function	8.4653e-16	3.871e-14	114	2784	1103	74606	TRIAE_CS42_5DL_TGACv1_433267_AA1407590,TRIAE_CS42_7AS_TGACv1_571321_AA1846800,TRIAE_CS42_2BS_TGACv1_146855_AA0474030,TRIAE_CS42_2BL_TGACv1_133208_AA0441860,TRIAE_CS42_U_TGACv1_641946_AA2108010,TRIAE_CS42_5DS_TGACv1_458111_AA1492100,TRIAE_CS42_1BL_TGACv1_033273_AA0138330,TRIAE_CS42_4DL_TGACv1_342840_AA1123400,TRIAE_CS42_4DS_TGACv1_362497_AA1180110,TRIAE_CS42_2AL_TGACv1_096378_AA0318970,TRIAE_CS42_…
GO:0009579	thylakoid	cellular_component	1.7079e-15	7.7571e-14	86	2784	761	74606	TRIAE_CS42_7BS_TGACv1_592029_AA1928690,TRIAE_CS42_2AL_TGACv1_094054_AA0291710,TRIAE_CS42_6DL_TGACv1_526634_AA1688730,TRIAE_CS42_6AS_TGACv1_485824_AA1552850,AIG90477,TRIAE_CS42_4BL_TGACv1_320359_AA1036670,TRIAE_CS42_3DL_TGACv1_249692_AA0854470,TRIAE_CS42_6BS_TGACv1_514827_AA1664770,TRIAE_CS42_3DL_TGACv1_251681_AA0883770,TRIAE_CS42_6AS_TGACv1_486605_AA1563110,TRIAE_CS42_1BL_TGACv1_032695_AA0133030,…
GO:0005525	GTP binding	molecular_function	1.8873e-15	8.4016e-14	68	2784	621	74606	TRIAE_CS42_6DS_TGACv1_542672_AA1727030,TRIAE_CS42_2AS_TGACv1_112651_AA0342920,TRIAE_CS42_2AS_TGACv1_112051_AA0328780,TRIAE_CS42_3DS_TGACv1_272355_AA0919480,TRIAE_CS42_U_TGACv1_645386_AA2144200,TRIAE_CS42_5BL_TGACv1_406442_AA1345570,TRIAE_CS42_4DS_TGACv1_361934_AA1174490,TRIAE_CS42_3AS_TGACv1_212111_AA0697830,TRIAE_CS42_U_TGACv1_641131_AA2086360,TRIAE_CS42_4DS_TGACv1_361965_AA1174860,TRIAE_CS42_U_…
GO:0019001	guanyl nucleotide binding	molecular_function	1.8873e-15	8.4016e-14	68	2784	621	74606	TRIAE_CS42_1DS_TGACv1_081003_AA0256680,TRIAE_CS42_3DL_TGACv1_251720_AA0884160,TRIAE_CS42_3DL_TGACv1_250988_AA0875910,TRIAE_CS42_6BS_TGACv1_513186_AA1633440,TRIAE_CS42_3DL_TGACv1_251193_AA0878620,TRIAE_CS42_U_TGACv1_640715_AA2070680,TRIAE_CS42_5AL_TGACv1_376685_AA1239940,TRIAE_CS42_2DS_TGACv1_177177_AA0568030,TRIAE_CS42_3AS_TGACv1_211332_AA0688720,TRIAE_CS42_3B_TGACv1_225173_AA0805840,TRIAE_CS42_3…
GO:0032561	guanyl ribonucleotide binding	molecular_function	1.8873e-15	8.4016e-14	68	2784	621	74606	TRIAE_CS42_1DS_TGACv1_080446_AA0248170,TRIAE_CS42_1AL_TGACv1_000073_AA0002580,TRIAE_CS42_7AS_TGACv1_570442_AA1835740,TRIAE_CS42_6AS_TGACv1_486373_AA1560720,TRIAE_CS42_3DL_TGACv1_250782_AA0873100,TRIAE_CS42_4AL_TGACv1_290422_AA0985250,TRIAE_CS42_1DL_TGACv1_062002_AA0207250,TRIAE_CS42_4DL_TGACv1_345003_AA1151000,TRIAE_CS42_4BL_TGACv1_320923_AA1051800,TRIAE_CS42_5BL_TGACv1_406685_AA1348600,TRIAE_CS4…
GO:0044436	thylakoid part	cellular_component	3.1012e-15	1.3715e-13	77	2784	637	74606	TRIAE_CS42_1DS_TGACv1_082951_AA0265140,TRIAE_CS42_5AL_TGACv1_379174_AA1255680,TRIAE_CS42_2AL_TGACv1_095324_AA0309650,TRIAE_CS42_5AL_TGACv1_378876_AA1254920,TRIAE_CS42_1AL_TGACv1_009365_AA0055660,TRIAE_CS42_5BL_TGACv1_404454_AA1300370,TRIAE_CS42_2DS_TGACv1_177169_AA0567350,TRIAE_CS42_4AL_TGACv1_290051_AA0980910,TRIAE_CS42_6BS_TGACv1_514208_AA1656990,TRIAE_CS42_5DL_TGACv1_434747_AA1440950,TRIAE_CS4…
GO:0009523	photosystem II	cellular_component	3.3982e-15	1.493e-13	41	2784	207	74606	TRIAE_CS42_7DS_TGACv1_625332_AA2064910,TRIAE_CS42_1BL_TGACv1_030603_AA0095440,TRIAE_CS42_4DS_TGACv1_362641_AA1181180,TRIAE_CS42_5BL_TGACv1_404374_AA1297310,TRIAE_CS42_6DS_TGACv1_543042_AA1734510,TRIAE_CS42_1AL_TGACv1_000383_AA0010660,TRIAE_CS42_1BL_TGACv1_030910_AA0103600,TRIAE_CS42_1AL_TGACv1_009365_AA0055660,TRIAE_CS42_1DL_TGACv1_061593_AA0199390,TRIAE_CS42_7AS_TGACv1_569064_AA1806110,TRIAE_CS4…
GO:0034357	photosynthetic membrane	cellular_component	6.0661e-15	2.6478e-13	74	2784	604	74606	TRIAE_CS42_4AS_TGACv1_306966_AA1015580,TRIAE_CS42_1AL_TGACv1_000383_AA0010660,TRIAE_CS42_3AL_TGACv1_197079_AA0664730,TRIAE_CS42_5BL_TGACv1_404374_AA1297310,TRIAE_CS42_6DS_TGACv1_543042_AA1734510,TRIAE_CS42_4DS_TGACv1_362641_AA1181180,TRIAE_CS42_2DL_TGACv1_160210_AA0548190,TRIAE_CS42_1BL_TGACv1_030603_AA0095440,TRIAE_CS42_2BL_TGACv1_130381_AA0409970,TRIAE_CS42_7AL_TGACv1_557134_AA1777250,TRIAE_CS4…
GO:0016052	carbohydrate catabolic process	biological_process	1.6018e-14	6.9467e-13	53	2784	447	74606	TRIAE_CS42_3AL_TGACv1_194246_AA0629560,TRIAE_CS42_6BS_TGACv1_513938_AA1652520,TRIAE_CS42_4AL_TGACv1_288604_AA0953590,TRIAE_CS42_7BS_TGACv1_592594_AA1941060,TRIAE_CS42_6AL_TGACv1_472261_AA1520090,TRIAE_CS42_3DS_TGACv1_271475_AA0899660,TRIAE_CS42_5DL_TGACv1_433836_AA1423410,TRIAE_CS42_3DL_TGACv1_250475_AA0868810,TRIAE_CS42_2DS_TGACv1_177244_AA0570280,TRIAE_CS42_5BL_TGACv1_406279_AA1343630,TRIAE_CS4…
GO:0030660	Golgi-associated vesicle membrane	cellular_component	1.7284e-14	7.4475e-13	17	2784	50	74606	TRIAE_CS42_1DL_TGACv1_061297_AA0191640,TRIAE_CS42_7AL_TGACv1_556695_AA1769100,TRIAE_CS42_5AL_TGACv1_374774_AA1208800,TRIAE_CS42_7AS_TGACv1_571321_AA1846800,TRIAE_CS42_1AL_TGACv1_001331_AA0028860,TRIAE_CS42_7DS_TGACv1_623122_AA2049790,TRIAE_CS42_4AL_TGACv1_288747_AA0957130,TRIAE_CS42_4DS_TGACv1_362497_AA1180110,TRIAE_CS42_7DL_TGACv1_602635_AA1963430,TRIAE_CS42_4BL_TGACv1_321458_AA1060720,TRIAE_CS4…
GO:0016614	oxidoreductase activity, acting on CH-OH group of donors	molecular_function	2.8787e-14	1.2325e-12	59	2784	551	74606	TRIAE_CS42_7DS_TGACv1_622404_AA2038940,TRIAE_CS42_2BL_TGACv1_130544_AA0413270,TRIAE_CS42_1AL_TGACv1_000087_AA0002830,TRIAE_CS42_6DS_TGACv1_542862_AA1731740,TRIAE_CS42_7BL_TGACv1_578944_AA1902350,TRIAE_CS42_6AL_TGACv1_473639_AA1532140,TRIAE_CS42_7DL_TGACv1_603091_AA1975740,TRIAE_CS42_U_TGACv1_641020_AA2082360,TRIAE_CS42_6AL_TGACv1_473897_AA1533380,TRIAE_CS42_3AL_TGACv1_194753_AA0638830,TRIAE_CS42_…
GO:0009526	plastid envelope	cellular_component	2.207e-13	9.3896e-12	52	2784	429	74606	TRIAE_CS42_3AL_TGACv1_193741_AA0618880,TRIAE_CS42_2AS_TGACv1_112052_AA0328860,TRIAE_CS42_2BS_TGACv1_146815_AA0473320,TRIAE_CS42_5BL_TGACv1_405982_AA1338590,TRIAE_CS42_4DL_TGACv1_343812_AA1140000,TRIAE_CS42_7BS_TGACv1_592896_AA1945990,TRIAE_CS42_4DS_TGACv1_361391_AA1166860,TRIAE_CS42_4BL_TGACv1_321702_AA1064290,TRIAE_CS42_4DL_TGACv1_345711_AA1154220,TRIAE_CS42_3B_TGACv1_220619_AA0711750,TRIAE_CS42…
GO:0009941	chloroplast envelope	cellular_component	3.0181e-13	1.2759e-11	51	2784	417	74606	TRIAE_CS42_3B_TGACv1_220870_AA0721770,TRIAE_CS42_3AL_TGACv1_194354_AA0631540,TRIAE_CS42_3B_TGACv1_223576_AA0784150,TRIAE_CS42_3DL_TGACv1_249892_AA0858230,TRIAE_CS42_3DL_TGACv1_251693_AA0883950,TRIAE_CS42_3B_TGACv1_222044_AA0755670,TRIAE_CS42_2DL_TGACv1_160070_AA0546350,TRIAE_CS42_3AL_TGACv1_196872_AA0663430,TRIAE_CS42_6DL_TGACv1_528046_AA1711090,TRIAE_CS42_5AL_TGACv1_376343_AA1235470,TRIAE_CS42_2…
GO:0051179	localization	biological_process	4.1672e-13	1.7508e-11	295	2784	5398	74606	TRIAE_CS42_4DS_TGACv1_361391_AA1166860,TRIAE_CS42_2BS_TGACv1_146165_AA0457230,TRIAE_CS42_2BL_TGACv1_132610_AA0438600,TRIAE_CS42_7BL_TGACv1_577333_AA1872500,TRIAE_CS42_1AL_TGACv1_000633_AA0016240,TRIAE_CS42_6AS_TGACv1_485760_AA1551380,TRIAE_CS42_3DL_TGACv1_250186_AA0863800,TRIAE_CS42_5BL_TGACv1_405597_AA1331170,TRIAE_CS42_3DL_TGACv1_250988_AA0875910,TRIAE_CS42_6DS_TGACv1_544331_AA1747820,TRIAE_CS4…
GO:0030529	intracellular ribonucleoprotein complex	cellular_component	4.4351e-13	1.8517e-11	120	2784	1317	74606	TRIAE_CS42_7BS_TGACv1_592265_AA1934530,TRIAE_CS42_3B_TGACv1_223834_AA0788190,TRIAE_CS42_3AL_TGACv1_198285_AA0668310,TRIAE_CS42_2BS_TGACv1_146026_AA0453440,TRIAE_CS42_6AS_TGACv1_485212_AA1540270,TRIAE_CS42_3DL_TGACv1_249293_AA0844440,TRIAE_CS42_1AS_TGACv1_019223_AA0063510,TRIAE_CS42_7BL_TGACv1_577301_AA1871640,TRIAE_CS42_2BL_TGACv1_132610_AA0438600,TRIAE_CS42_4AS_TGACv1_308228_AA1026790,TRIAE_CS42…
GO:1990904	ribonucleoprotein complex	cellular_component	4.7322e-13	1.9636e-11	120	2784	1319	74606	TRIAE_CS42_3DS_TGACv1_271549_AA0902350,TRIAE_CS42_5AS_TGACv1_392611_AA1262120,TRIAE_CS42_7AL_TGACv1_557342_AA1779950,TRIAE_CS42_5DL_TGACv1_435150_AA1446750,TRIAE_CS42_5DL_TGACv1_434846_AA1442410,TRIAE_CS42_6BL_TGACv1_499571_AA1586440,TRIAE_CS42_5AL_TGACv1_374249_AA1195140,TRIAE_CS42_2BL_TGACv1_129383_AA0381070,TRIAE_CS42_6AS_TGACv1_486894_AA1566280,TRIAE_CS42_7DS_TGACv1_622498_AA2040880,TRIAE_CS4…
GO:0030662	coated vesicle membrane	cellular_component	7.7377e-13	3.191e-11	21	2784	92	74606	TRIAE_CS42_4BL_TGACv1_321458_AA1060720,TRIAE_CS42_4DS_TGACv1_361471_AA1168550,TRIAE_CS42_7DL_TGACv1_602635_AA1963430,TRIAE_CS42_4DS_TGACv1_362497_AA1180110,TRIAE_CS42_4AL_TGACv1_288747_AA0957130,TRIAE_CS42_7DS_TGACv1_623122_AA2049790,TRIAE_CS42_1AL_TGACv1_001331_AA0028860,TRIAE_CS42_7AS_TGACv1_571321_AA1846800,TRIAE_CS42_5AL_TGACv1_374774_AA1208800,TRIAE_CS42_7AL_TGACv1_556695_AA1769100,TRIAE_CS4…
GO:0051234	establishment of localization	biological_process	8.5758e-13	3.515e-11	291	2784	5343	74606	TRIAE_CS42_5AL_TGACv1_375582_AA1223960,TRIAE_CS42_5AL_TGACv1_378411_AA1253160,TRIAE_CS42_2AL_TGACv1_094969_AA0305370,TRIAE_CS42_2BL_TGACv1_129610_AA0390450,TRIAE_CS42_1BS_TGACv1_050901_AA0176550,TRIAE_CS42_6DS_TGACv1_542931_AA1732740,TRIAE_CS42_3B_TGACv1_223525_AA0783520,TRIAE_CS42_3DL_TGACv1_250339_AA0866430,TRIAE_CS42_1DL_TGACv1_062768_AA0219620,TRIAE_CS42_1AS_TGACv1_019137_AA0061430,TRIAE_CS42…
GO:0030659	cytoplasmic vesicle membrane	cellular_component	1.007e-12	4.1024e-11	24	2784	119	74606	TRIAE_CS42_6AS_TGACv1_486272_AA1559050,TRIAE_CS42_2DL_TGACv1_158815_AA0526570,TRIAE_CS42_6AL_TGACv1_471165_AA1503930,TRIAE_CS42_6DS_TGACv1_542583_AA1724790,TRIAE_CS42_U_TGACv1_641043_AA2083140,TRIAE_CS42_4BS_TGACv1_328452_AA1088030,TRIAE_CS42_5AL_TGACv1_378411_AA1253160,TRIAE_CS42_4BL_TGACv1_320261_AA1032800,TRIAE_CS42_1BL_TGACv1_031076_AA0107250,TRIAE_CS42_6BS_TGACv1_514683_AA1663200,TRIAE_CS42_…
GO:0016192	vesicle-mediated transport	biological_process	1.1917e-12	4.8255e-11	64	2784	672	74606	TRIAE_CS42_5AS_TGACv1_394157_AA1278420,TRIAE_CS42_7DS_TGACv1_623122_AA2049790,TRIAE_CS42_7AL_TGACv1_556695_AA1769100,TRIAE_CS42_4AS_TGACv1_306421_AA1007900,TRIAE_CS42_4DS_TGACv1_361471_AA1168550,TRIAE_CS42_6AL_TGACv1_471366_AA1507720,TRIAE_CS42_3AL_TGACv1_197715_AA0667040,TRIAE_CS42_3B_TGACv1_222072_AA0756730,TRIAE_CS42_5DS_TGACv1_456933_AA1479990,TRIAE_CS42_6BL_TGACv1_499660_AA1588490,TRIAE_CS42…
GO:0090407	organophosphate biosynthetic process	biological_process	1.4019e-12	5.6429e-11	56	2784	529	74606	TRIAE_CS42_1AL_TGACv1_003920_AA0051930,TRIAE_CS42_U_TGACv1_643776_AA2134960,TRIAE_CS42_2BS_TGACv1_146261_AA0460710,TRIAE_CS42_6DL_TGACv1_526566_AA1687250,TRIAE_CS42_1DL_TGACv1_063094_AA0223830,TRIAE_CS42_3AL_TGACv1_196405_AA0660080,TRIAE_CS42_1AL_TGACv1_000051_AA0001340,TRIAE_CS42_2DL_TGACv1_158421_AA0518370,TRIAE_CS42_7BS_TGACv1_592341_AA1936030,TRIAE_CS42_3DL_TGACv1_254806_AA0896680,TRIAE_CS42_…
GO:0006810	transport	biological_process	1.4675e-12	5.8719e-11	288	2784	5299	74606	TRIAE_CS42_4AL_TGACv1_290350_AA0984400,TRIAE_CS42_2DL_TGACv1_159102_AA0532400,TRIAE_CS42_1AL_TGACv1_000296_AA0008180,TRIAE_CS42_6DS_TGACv1_544331_AA1747810,TRIAE_CS42_6BS_TGACv1_514369_AA1658930,TRIAE_CS42_5DL_TGACv1_433496_AA1414720,TRIAE_CS42_3B_TGACv1_222072_AA0756730,TRIAE_CS42_1BL_TGACv1_033737_AA0141740,TRIAE_CS42_6DL_TGACv1_526612_AA1688300,TRIAE_CS42_3DL_TGACv1_250717_AA0872310,TRIAE_CS42…
GO:0044433	cytoplasmic vesicle part	cellular_component	1.4969e-12	5.9539e-11	24	2784	122	74606	TRIAE_CS42_7DL_TGACv1_602635_AA1963430,TRIAE_CS42_4DS_TGACv1_361471_AA1168550,TRIAE_CS42_4BL_TGACv1_321458_AA1060720,TRIAE_CS42_U_TGACv1_642234_AA2113860,TRIAE_CS42_4DS_TGACv1_362497_AA1180110,TRIAE_CS42_7AS_TGACv1_571321_AA1846800,TRIAE_CS42_1AL_TGACv1_001331_AA0028860,TRIAE_CS42_7DS_TGACv1_623122_AA2049790,TRIAE_CS42_4AL_TGACv1_288747_AA0957130,TRIAE_CS42_4AS_TGACv1_306421_AA1007900,TRIAE_CS42_…
GO:0009058	biosynthetic process	biological_process	1.7136e-12	6.7758e-11	544	2784	10911	74606	TRIAE_CS42_2AL_TGACv1_094865_AA0304200,TRIAE_CS42_7BS_TGACv1_592259_AA1934400,TRIAE_CS42_4DL_TGACv1_342985_AA1127050,TRIAE_CS42_5AS_TGACv1_392500_AA1259630,TRIAE_CS42_2DL_TGACv1_159916_AA0544360,TRIAE_CS42_U_TGACv1_643342_AA2130900,TRIAE_CS42_3AL_TGACv1_193689_AA0617640,TRIAE_CS42_6AS_TGACv1_487104_AA1568170,TRIAE_CS42_7BL_TGACv1_577000_AA1862420,TRIAE_CS42_7BL_TGACv1_577483_AA1876500,TRIAE_CS42_…
GO:0012506	vesicle membrane	cellular_component	1.9524e-12	7.6747e-11	24	2784	122	74606	TRIAE_CS42_U_TGACv1_641043_AA2083140,TRIAE_CS42_6DS_TGACv1_542583_AA1724790,TRIAE_CS42_2DL_TGACv1_158815_AA0526570,TRIAE_CS42_6AL_TGACv1_471165_AA1503930,TRIAE_CS42_6AS_TGACv1_486272_AA1559050,TRIAE_CS42_6BS_TGACv1_514683_AA1663200,TRIAE_CS42_4BS_TGACv1_328452_AA1088030,TRIAE_CS42_5AL_TGACv1_378411_AA1253160,TRIAE_CS42_4BL_TGACv1_320261_AA1032800,TRIAE_CS42_1BL_TGACv1_031076_AA0107250,TRIAE_CS42_…
GO:0009521	photosystem	cellular_component	2.0145e-12	7.873e-11	42	2784	256	74606	TRIAE_CS42_4AL_TGACv1_291250_AA0993200,TRIAE_CS42_5DL_TGACv1_434747_AA1440970,TRIAE_CS42_5DL_TGACv1_433321_AA1409630,TRIAE_CS42_2DL_TGACv1_159162_AA0533640,TRIAE_CS42_7BS_TGACv1_592029_AA1928680,TRIAE_CS42_5AL_TGACv1_375138_AA1216740,TRIAE_CS42_3B_TGACv1_227262_AA0822510,TRIAE_CS42_5AL_TGACv1_378876_AA1254930,TRIAE_CS42_3AL_TGACv1_194074_AA0625970,TRIAE_CS42_U_TGACv1_643126_AA2127630,TRIAE_CS42_5…
GO:0031410	cytoplasmic vesicle	cellular_component	2.4423e-12	9.4898e-11	29	2784	183	74606	TRIAE_CS42_5AL_TGACv1_378411_AA1253160,TRIAE_CS42_4BS_TGACv1_328452_AA1088030,TRIAE_CS42_4BL_TGACv1_320261_AA1032800,TRIAE_CS42_1BL_TGACv1_031076_AA0107250,TRIAE_CS42_6BS_TGACv1_514683_AA1663200,TRIAE_CS42_6AL_TGACv1_471165_AA1503930,TRIAE_CS42_2DL_TGACv1_158815_AA0526570,TRIAE_CS42_6AS_TGACv1_486272_AA1559050,TRIAE_CS42_6DS_TGACv1_542583_AA1724790,TRIAE_CS42_3DL_TGACv1_250339_AA0866430,TRIAE_CS4…
GO:2001070	starch binding	molecular_function	2.6387e-12	1.0194e-10	14	2784	38	74606	TRIAE_CS42_3B_TGACv1_220592_AA0710100,TRIAE_CS42_4BS_TGACv1_329631_AA1102810,TRIAE_CS42_2BL_TGACv1_131141_AA0423210,TRIAE_CS42_2DL_TGACv1_159587_AA0540290,TRIAE_CS42_3AL_TGACv1_193608_AA0614780,TRIAE_CS42_3DL_TGACv1_251077_AA0877160,TRIAE_CS42_2DS_TGACv1_177436_AA0577070,TRIAE_CS42_4AS_TGACv1_306645_AA1011430,TRIAE_CS42_5AL_TGACv1_374631_AA1204970,TRIAE_CS42_2BS_TGACv1_148740_AA0494910,TRIAE_CS42…
GO:0046165	alcohol biosynthetic process	biological_process	3.2979e-12	1.2668e-10	21	2784	86	74606	TRIAE_CS42_4DL_TGACv1_342557_AA1116570,TRIAE_CS42_7AL_TGACv1_556888_AA1772870,TRIAE_CS42_3B_TGACv1_221027_AA0727340,TRIAE_CS42_7BS_TGACv1_591893_AA1924780,TRIAE_CS42_1DL_TGACv1_062419_AA0214280,TRIAE_CS42_4AS_TGACv1_307361_AA1019860,TRIAE_CS42_1AL_TGACv1_000734_AA0018090,TRIAE_CS42_4BL_TGACv1_320456_AA1039910,TRIAE_CS42_4DS_TGACv1_361422_AA1167650,TRIAE_CS42_4DL_TGACv1_343496_AA1135330,TRIAE_CS42…
GO:0008654	phospholipid biosynthetic process	biological_process	3.5224e-12	1.3453e-10	28	2784	166	74606	TRIAE_CS42_1AL_TGACv1_003920_AA0051930,TRIAE_CS42_6AS_TGACv1_485300_AA1542750,TRIAE_CS42_U_TGACv1_643776_AA2134960,TRIAE_CS42_2BS_TGACv1_146261_AA0460710,TRIAE_CS42_6DL_TGACv1_526566_AA1687250,TRIAE_CS42_1DL_TGACv1_063094_AA0223830,TRIAE_CS42_3AL_TGACv1_196405_AA0660080,TRIAE_CS42_5AL_TGACv1_375241_AA1218400,TRIAE_CS42_7BS_TGACv1_592341_AA1936030,TRIAE_CS42_5DL_TGACv1_433855_AA1423770,TRIAE_CS42_…
GO:0098588	bounding membrane of organelle	cellular_component	4.1925e-12	1.5922e-10	90	2784	1121	74606	TRIAE_CS42_4DS_TGACv1_361383_AA1166600,TRIAE_CS42_5DS_TGACv1_458693_AA1494370,TRIAE_CS42_4DL_TGACv1_342471_AA1114460,TRIAE_CS42_4AS_TGACv1_307078_AA1016740,TRIAE_CS42_3DS_TGACv1_272832_AA0925630,TRIAE_CS42_3DL_TGACv1_250988_AA0875910,TRIAE_CS42_5BL_TGACv1_405597_AA1331170,TRIAE_CS42_U_TGACv1_641043_AA2083140,TRIAE_CS42_3DL_TGACv1_250864_AA0874390,TRIAE_CS42_3B_TGACv1_222757_AA0770040,TRIAE_CS42_3…
GO:0006790	sulfur compound metabolic process	biological_process	5.3128e-12	2.0063e-10	38	2784	291	74606	TRIAE_CS42_7BL_TGACv1_578034_AA1888270,TRIAE_CS42_5AL_TGACv1_376570_AA1238560,TRIAE_CS42_2AL_TGACv1_094486_AA0298610,TRIAE_CS42_6BL_TGACv1_499577_AA1586520,TRIAE_CS42_4BL_TGACv1_321851_AA1066220,TRIAE_CS42_6AL_TGACv1_475648_AA1536640,TRIAE_CS42_4DS_TGACv1_361983_AA1175310,TRIAE_CS42_5BS_TGACv1_423584_AA1379990,TRIAE_CS42_1AL_TGACv1_000132_AA0004290,TRIAE_CS42_2BS_TGACv1_145868_AA0447700,TRIAE_CS4…
GO:0030135	coated vesicle	cellular_component	5.7391e-12	2.1552e-10	24	2784	133	74606	TRIAE_CS42_6AS_TGACv1_486272_AA1559050,TRIAE_CS42_2DL_TGACv1_158815_AA0526570,TRIAE_CS42_6DS_TGACv1_542583_AA1724790,TRIAE_CS42_U_TGACv1_641043_AA2083140,TRIAE_CS42_3DL_TGACv1_250339_AA0866430,TRIAE_CS42_1BL_TGACv1_031076_AA0107250,TRIAE_CS42_5AL_TGACv1_378411_AA1253160,TRIAE_CS42_4BL_TGACv1_320261_AA1032800,TRIAE_CS42_4BS_TGACv1_328452_AA1088030,TRIAE_CS42_6BS_TGACv1_514683_AA1663200,TRIAE_CS42_…
GO:0006631	fatty acid metabolic process	biological_process	6.6914e-12	2.4988e-10	47	2784	422	74606	TRIAE_CS42_1BL_TGACv1_030654_AA0097000,TRIAE_CS42_3B_TGACv1_221200_AA0733610,TRIAE_CS42_3AL_TGACv1_194246_AA0629560,TRIAE_CS42_2AS_TGACv1_112777_AA0345060,TRIAE_CS42_1DL_TGACv1_061125_AA0186220,TRIAE_CS42_7AS_TGACv1_569074_AA1806510,TRIAE_CS42_7BS_TGACv1_593415_AA1951220,TRIAE_CS42_7AS_TGACv1_572202_AA1851680,TRIAE_CS42_5DL_TGACv1_437042_AA1464780,TRIAE_CS42_5AL_TGACv1_374480_AA1201250,TRIAE_CS42…
GO:0005798	Golgi-associated vesicle	cellular_component	7.3907e-12	2.7448e-10	17	2784	66	74606	TRIAE_CS42_4DS_TGACv1_362497_AA1180110,TRIAE_CS42_7DL_TGACv1_602635_AA1963430,TRIAE_CS42_4BL_TGACv1_321458_AA1060720,TRIAE_CS42_1DL_TGACv1_061297_AA0191640,TRIAE_CS42_5AL_TGACv1_374774_AA1208800,TRIAE_CS42_7AL_TGACv1_556695_AA1769100,TRIAE_CS42_1AL_TGACv1_001331_AA0028860,TRIAE_CS42_7DS_TGACv1_623122_AA2049790,TRIAE_CS42_7AS_TGACv1_571321_AA1846800,TRIAE_CS42_4AL_TGACv1_288747_AA0957130,TRIAE_CS4…
GO:0031982	vesicle	cellular_component	7.5351e-12	2.783e-10	29	2784	190	74606	TRIAE_CS42_4BL_TGACv1_321458_AA1060720,TRIAE_CS42_4DS_TGACv1_361471_AA1168550,TRIAE_CS42_7DL_TGACv1_602635_AA1963430,TRIAE_CS42_4DS_TGACv1_362497_AA1180110,TRIAE_CS42_U_TGACv1_642234_AA2113860,TRIAE_CS42_2AL_TGACv1_096831_AA0321630,TRIAE_CS42_2DL_TGACv1_158753_AA0525450,TRIAE_CS42_3AL_TGACv1_194328_AA0631110,TRIAE_CS42_4AL_TGACv1_288747_AA0957130,TRIAE_CS42_1AL_TGACv1_001331_AA0028860,TRIAE_CS42_…
GO:0005739	mitochondrion	cellular_component	7.9579e-12	2.9231e-10	97	2784	1165	74606	TRIAE_CS42_2BL_TGACv1_129772_AA0395390,TRIAE_CS42_4DL_TGACv1_342742_AA1120750,TRIAE_CS42_2AL_TGACv1_095324_AA0309650,TRIAE_CS42_7DS_TGACv1_621871_AA2028250,TRIAE_CS42_4DL_TGACv1_345350_AA1152790,TRIAE_CS42_6DL_TGACv1_527470_AA1704490,TRIAE_CS42_6BL_TGACv1_501539_AA1618480,TRIAE_CS42_3B_TGACv1_225872_AA0812520,TRIAE_CS42_1DL_TGACv1_063075_AA0223620,TRIAE_CS42_7DL_TGACv1_603543_AA1985490,TRIAE_CS42…
GO:1901576	organic substance biosynthetic process	biological_process	1.4802e-11	5.4017e-10	517	2784	10425	74606	TRIAE_CS42_2AL_TGACv1_093662_AA0284750,TRIAE_CS42_4BL_TGACv1_321575_AA1062420,TRIAE_CS42_6BL_TGACv1_500297_AA1602810,TRIAE_CS42_6AL_TGACv1_472657_AA1524540,TRIAE_CS42_7AS_TGACv1_571172_AA1845410,TRIAE_CS42_1BL_TGACv1_030377_AA0088540,TRIAE_CS42_4BL_TGACv1_320848_AA1050110,TRIAE_CS42_7BS_TGACv1_592783_AA1944260,TRIAE_CS42_7DS_TGACv1_623124_AA2049810,TRIAE_CS42_4BL_TGACv1_322214_AA1069720,TRIAE_CS4…
GO:0005975	carbohydrate metabolic process	biological_process	1.4866e-11	5.4017e-10	173	2784	2928	74606	TRIAE_CS42_3B_TGACv1_226284_AA0815680,TRIAE_CS42_4AS_TGACv1_306645_AA1011430,TRIAE_CS42_1DL_TGACv1_062999_AA0222790,TRIAE_CS42_7AL_TGACv1_556974_AA1774520,TRIAE_CS42_6BL_TGACv1_502089_AA1623000,TRIAE_CS42_4BL_TGACv1_320480_AA1040880,TRIAE_CS42_4AL_TGACv1_290300_AA0983760,TRIAE_CS42_3AL_TGACv1_195488_AA0650140,TRIAE_CS42_1AL_TGACv1_000087_AA0002830,TRIAE_CS42_4BL_TGACv1_321135_AA1056010,TRIAE_CS42…
GO:0044262	cellular carbohydrate metabolic process	biological_process	1.5657e-11	5.6585e-10	61	2784	703	74606	TRIAE_CS42_2DL_TGACv1_159587_AA0540290,TRIAE_CS42_2BL_TGACv1_131489_AA0428400,TRIAE_CS42_7BL_TGACv1_576920_AA1859780,TRIAE_CS42_5BL_TGACv1_404684_AA1308350,TRIAE_CS42_2AL_TGACv1_093163_AA0273760,TRIAE_CS42_2BS_TGACv1_147826_AA0487990,TRIAE_CS42_1BL_TGACv1_031136_AA0108420,TRIAE_CS42_4DL_TGACv1_342557_AA1116570,TRIAE_CS42_7AL_TGACv1_556597_AA1766600,TRIAE_CS42_4BL_TGACv1_320480_AA1040880,TRIAE_CS4…
GO:1901617	organic hydroxy compound biosynthetic process	biological_process	1.7488e-11	6.2826e-10	25	2784	135	74606	TRIAE_CS42_1DL_TGACv1_062419_AA0214280,TRIAE_CS42_7AL_TGACv1_559693_AA1800520,TRIAE_CS42_1AL_TGACv1_000734_AA0018090,TRIAE_CS42_4AS_TGACv1_307361_AA1019860,TRIAE_CS42_7BS_TGACv1_591893_AA1924780,TRIAE_CS42_7AL_TGACv1_556888_AA1772870,TRIAE_CS42_3B_TGACv1_221027_AA0727340,TRIAE_CS42_4DL_TGACv1_342557_AA1116570,TRIAE_CS42_4AL_TGACv1_288528_AA0951160,TRIAE_CS42_1DL_TGACv1_063094_AA0223830,TRIAE_CS42…
GO:0050662	coenzyme binding	molecular_function	1.7571e-11	6.2826e-10	89	2784	1162	74606	TRIAE_CS42_4DL_TGACv1_342433_AA1113530,TRIAE_CS42_7BL_TGACv1_581111_AA1916500,TRIAE_CS42_6AL_TGACv1_473639_AA1532140,TRIAE_CS42_3AL_TGACv1_194753_AA0638830,TRIAE_CS42_7DL_TGACv1_603091_AA1975740,TRIAE_CS42_2DL_TGACv1_160628_AA0552420,TRIAE_CS42_7BL_TGACv1_578013_AA1887930,TRIAE_CS42_7AS_TGACv1_571173_AA1845420,TRIAE_CS42_7BL_TGACv1_580117_AA1912080,TRIAE_CS42_4AL_TGACv1_291220_AA0993030,TRIAE_CS4…
GO:0003824	catalytic activity	molecular_function	2.4288e-11	8.6382e-10	1170	2784	28495	74606	TRIAE_CS42_4AL_TGACv1_291661_AA0995860,TRIAE_CS42_7AL_TGACv1_556869_AA1772530,TRIAE_CS42_7BL_TGACv1_579466_AA1907580,TRIAE_CS42_3AS_TGACv1_212705_AA0702690,TRIAE_CS42_4DS_TGACv1_362522_AA1180350,TRIAE_CS42_7DL_TGACv1_604116_AA1994020,TRIAE_CS42_6BS_TGACv1_514091_AA1654910,TRIAE_CS42_4AS_TGACv1_307131_AA1017430,TRIAE_CS42_2AS_TGACv1_112995_AA0349380,TRIAE_CS42_1DS_TGACv1_081003_AA0256670,TRIAE_CS4…
8360,TRIAE_CS42_1DL_TGACv1_061176_AA0187850,TRIAE_CS42_7BS_TGACv1_594373_AA1957290,TRIAE_CS42_5BL_TGACv1_405531_AA1329570,TRIAE_CS42_6AL_TGACv1_472181_AA1518660,TRIAE_CS42_6BL_TGACv1_503117_AA1627270,TRIAE_CS42_3AL_TGACv1_195149_AA0645420,TRIAE_CS42_3B_TGACv1_220588_AA0709800,TRIAE_CS42_5DL_TGACv1_434368_AA1434620,TRIAE_CS42_7AL_TGACv1_558796_AA1796130,TRIAE_CS42_3B_TGACv1_224633_AA0799040,TRIAE_…
GO:0000234	phosphoethanolamine N-methyltransferase activity	molecular_function	2.9541e-11	1.0451e-09	7	2784	7	74606	TRIAE_CS42_3B_TGACv1_221027_AA0727340,TRIAE_CS42_1AL_TGACv1_000734_AA0018090,TRIAE_CS42_1DL_TGACv1_062419_AA0214280,TRIAE_CS42_3AL_TGACv1_196405_AA0660080,TRIAE_CS42_1BL_TGACv1_032207_AA0126810,TRIAE_CS42_1DL_TGACv1_063094_AA0223830,TRIAE_CS42_3DL_TGACv1_254806_AA0896680
GO:0003924	GTPase activity	molecular_function	3.0094e-11	1.0591e-09	48	2784	441	74606	TRIAE_CS42_1BL_TGACv1_030590_AA0094940,TRIAE_CS42_6AS_TGACv1_486557_AA1562630,TRIAE_CS42_2BS_TGACv1_146602_AA0469260,TRIAE_CS42_3DS_TGACv1_271947_AA0911510,TRIAE_CS42_6DS_TGACv1_542706_AA1728340,TRIAE_CS42_1DL_TGACv1_062495_AA0215330,TRIAE_CS42_3B_TGACv1_221031_AA0727440,TRIAE_CS42_2BS_TGACv1_146038_AA0453790,TRIAE_CS42_1BL_TGACv1_031835_AA0121450,TRIAE_CS42_1AL_TGACv1_001070_AA0024450,TRIAE_CS42…
GO:0016866	intramolecular transferase activity	molecular_function	3.4787e-11	1.2179e-09	27	2784	164	74606	TRIAE_CS42_2BS_TGACv1_147826_AA0487990,TRIAE_CS42_7DS_TGACv1_622835_AA2046010,TRIAE_CS42_5BS_TGACv1_423595_AA1380330,TRIAE_CS42_U_TGACv1_641465_AA2095880,TRIAE_CS42_2AL_TGACv1_094865_AA0304200,TRIAE_CS42_2DS_TGACv1_180213_AA0610440,TRIAE_CS42_4AL_TGACv1_289959_AA0979560,TRIAE_CS42_2BL_TGACv1_131489_AA0428400,TRIAE_CS42_6BS_TGACv1_515650_AA1671540,TRIAE_CS42_2DL_TGACv1_158000_AA0505500,TRIAE_CS42_…
GO:0046961	proton-transporting ATPase activity, rotational mechanism	molecular_function	5.1256e-11	1.7852e-09	11	2784	20	74606	TRIAE_CS42_3B_TGACv1_221643_AA0746430,TRIAE_CS42_7AL_TGACv1_559344_AA1799200,TRIAE_CS42_3B_TGACv1_224031_AA0791230,TRIAE_CS42_7BL_TGACv1_579860_AA1910590,TRIAE_CS42_7DL_TGACv1_603800_AA1989460,TRIAE_CS42_3DL_TGACv1_250717_AA0872310,TRIAE_CS42_3AL_TGACv1_194690_AA0637900,TRIAE_CS42_3DS_TGACv1_272407_AA0920320,TRIAE_CS42_7AL_TGACv1_558294_AA1792080,TRIAE_CS42_7BL_TGACv1_579063_AA1903600,TRIAE_CS42_…
GO:0016023	cytoplasmic membrane-bounded vesicle	cellular_component	5.4567e-11	1.8907e-09	27	2784	181	74606	TRIAE_CS42_2DL_TGACv1_158815_AA0526570,TRIAE_CS42_6AL_TGACv1_471165_AA1503930,TRIAE_CS42_6AS_TGACv1_486272_AA1559050,TRIAE_CS42_6DS_TGACv1_542583_AA1724790,TRIAE_CS42_3DL_TGACv1_250339_AA0866430,TRIAE_CS42_U_TGACv1_641043_AA2083140,TRIAE_CS42_5AL_TGACv1_378411_AA1253160,TRIAE_CS42_1BL_TGACv1_031076_AA0107250,TRIAE_CS42_4BL_TGACv1_320261_AA1032800,TRIAE_CS42_4BS_TGACv1_328452_AA1088030,TRIAE_CS42_…
GO:0044272	sulfur compound biosynthetic process	biological_process	6.8087e-11	2.3471e-09	29	2784	194	74606	TRIAE_CS42_5AL_TGACv1_375327_AA1219960,TRIAE_CS42_4DL_TGACv1_343385_AA1133850,TRIAE_CS42_1DL_TGACv1_061125_AA0186220,TRIAE_CS42_2BS_TGACv1_148429_AA0492770,TRIAE_CS42_5DS_TGACv1_456564_AA1474130,TRIAE_CS42_5AS_TGACv1_393328_AA1271350,TRIAE_CS42_1BL_TGACv1_030654_AA0097000,TRIAE_CS42_7DS_TGACv1_624143_AA2059180,TRIAE_CS42_2DS_TGACv1_177565_AA0580190,TRIAE_CS42_3B_TGACv1_223441_AA0782230,TRIAE_CS42…
GO:1901659	glycosyl compound biosynthetic process	biological_process	8.6597e-11	2.9554e-09	30	2784	195	74606	TRIAE_CS42_5BL_TGACv1_406155_AA1341460,TRIAE_CS42_2BL_TGACv1_130381_AA0409970,TRIAE_CS42_1BL_TGACv1_030377_AA0088540,TRIAE_CS42_5DL_TGACv1_435540_AA1451810,TRIAE_CS42_3B_TGACv1_223258_AA0779170,TRIAE_CS42_4DS_TGACv1_361731_AA1172190,TRIAE_CS42_3DL_TGACv1_249279_AA0843940,TRIAE_CS42_7BL_TGACv1_578034_AA1888270,TRIAE_CS42_6BL_TGACv1_500297_AA1602810,TRIAE_CS42_6BL_TGACv1_499360_AA1579440,TRIAE_CS42…
GO:0033178	proton-transporting two-sector ATPase complex, catalytic domain	cellular_component	8.6612e-11	2.9554e-09	18	2784	65	74606	TRIAE_CS42_7AL_TGACv1_559344_AA1799200,TRIAE_CS42_1BL_TGACv1_031692_AA0118950,TRIAE_CS42_1AL_TGACv1_004040_AA0052320,TRIAE_CS42_7BL_TGACv1_579063_AA1903600,TRIAE_CS42_3DL_TGACv1_250717_AA0872310,TRIAE_CS42_7BL_TGACv1_579860_AA1910590,TRIAE_CS42_3B_TGACv1_224031_AA0791230,TRIAE_CS42_1AL_TGACv1_001462_AA0030900,TRIAE_CS42_6BS_TGACv1_514088_AA1654890,TRIAE_CS42_3B_TGACv1_221643_AA0746430,TRIAE_CS42_…
GO:0030137	COPI-coated vesicle	cellular_component	9.6547e-11	3.2613e-09	11	2784	29	74606	TRIAE_CS42_1BL_TGACv1_031076_AA0107250,TRIAE_CS42_4BL_TGACv1_321458_AA1060720,TRIAE_CS42_6BS_TGACv1_514683_AA1663200,TRIAE_CS42_5AL_TGACv1_374774_AA1208800,TRIAE_CS42_6AS_TGACv1_486272_AA1559050,TRIAE_CS42_6DS_TGACv1_542583_AA1724790,TRIAE_CS42_1DL_TGACv1_061297_AA0191640,TRIAE_CS42_U_TGACv1_641043_AA2083140,TRIAE_CS42_7DS_TGACv1_623122_AA2049790,TRIAE_CS42_1AL_TGACv1_001331_AA0028860,TRIAE_CS42_…
GO:0030663	COPI-coated vesicle membrane	cellular_component	9.6547e-11	3.2613e-09	11	2784	29	74606	TRIAE_CS42_1DL_TGACv1_061297_AA0191640,TRIAE_CS42_5AL_TGACv1_374774_AA1208800,TRIAE_CS42_6DS_TGACv1_542583_AA1724790,TRIAE_CS42_6AS_TGACv1_486272_AA1559050,TRIAE_CS42_1AL_TGACv1_001331_AA0028860,TRIAE_CS42_7DS_TGACv1_623122_AA2049790,TRIAE_CS42_7AS_TGACv1_571321_AA1846800,TRIAE_CS42_U_TGACv1_641043_AA2083140,TRIAE_CS42_1BL_TGACv1_031076_AA0107250,TRIAE_CS42_6BS_TGACv1_514683_AA1663200,TRIAE_CS42_…
GO:0006270	DNA replication initiation	biological_process	1.0708e-10	3.5989e-09	12	2784	33	74606	TRIAE_CS42_U_TGACv1_643292_AA2130280,TRIAE_CS42_3DL_TGACv1_252076_AA0887540,TRIAE_CS42_5BS_TGACv1_423792_AA1383390,TRIAE_CS42_5BL_TGACv1_407263_AA1355000,TRIAE_CS42_U_TGACv1_641839_AA2105360,TRIAE_CS42_5DS_TGACv1_457219_AA1483870,TRIAE_CS42_3B_TGACv1_224285_AA0794840,TRIAE_CS42_1AS_TGACv1_019881_AA0072380,TRIAE_CS42_3DL_TGACv1_251082_AA0877230,TRIAE_CS42_5AS_TGACv1_393478_AA1272980,TRIAE_CS42_6DL…
GO:0006633	fatty acid biosynthetic process	biological_process	1.083e-10	3.6219e-09	38	2784	319	74606	TRIAE_CS42_7AS_TGACv1_572202_AA1851680,TRIAE_CS42_7AS_TGACv1_569074_AA1806510,TRIAE_CS42_7BS_TGACv1_593415_AA1951220,TRIAE_CS42_5AL_TGACv1_374480_AA1201250,TRIAE_CS42_5DL_TGACv1_437042_AA1464780,TRIAE_CS42_2BS_TGACv1_147442_AA0483250,TRIAE_CS42_3AL_TGACv1_194246_AA0629560,TRIAE_CS42_3B_TGACv1_221200_AA0733610,TRIAE_CS42_1BL_TGACv1_030654_AA0097000,TRIAE_CS42_1DL_TGACv1_061125_AA0186220,TRIAE_CS42…
GO:0044249	cellular biosynthetic process	biological_process	1.1307e-10	3.7626e-09	506	2784	10288	74606	TRIAE_CS42_1DL_TGACv1_061095_AA0184930,TRIAE_CS42_6AS_TGACv1_485260_AA1541800,TRIAE_CS42_6BL_TGACv1_499707_AA1589630,TRIAE_CS42_2DL_TGACv1_158421_AA0518370,TRIAE_CS42_2DS_TGACv1_177565_AA0580190,TRIAE_CS42_6AL_TGACv1_471983_AA1516620,TRIAE_CS42_3B_TGACv1_225182_AA0805900,TRIAE_CS42_1AL_TGACv1_000254_AA0007380,TRIAE_CS42_3AL_TGACv1_194038_AA0625130,TRIAE_CS42_3DL_TGACv1_252598_AA0890960,TRIAE_CS42…
GO:0022804	active transmembrane transporter activity	molecular_function	1.2081e-10	4.0004e-09	64	2784	837	74606	TRIAE_CS42_7BL_TGACv1_579860_AA1910590,TRIAE_CS42_4AL_TGACv1_288269_AA0942920,TRIAE_CS42_2BL_TGACv1_129973_AA0400750,TRIAE_CS42_3B_TGACv1_223754_AA0786670,TRIAE_CS42_4AS_TGACv1_306580_AA1010500,TRIAE_CS42_1AL_TGACv1_004040_AA0052320,TRIAE_CS42_7AL_TGACv1_557283_AA1779210,TRIAE_CS42_2BL_TGACv1_129855_AA0398120,TRIAE_CS42_3B_TGACv1_220956_AA0724960,TRIAE_CS42_2DL_TGACv1_160329_AA0549350,TRIAE_CS42_…
GO:0031988	membrane-bounded vesicle	cellular_component	1.5025e-10	4.9509e-09	27	2784	187	74606	TRIAE_CS42_2DL_TGACv1_158815_AA0526570,TRIAE_CS42_6AL_TGACv1_471165_AA1503930,TRIAE_CS42_6AS_TGACv1_486272_AA1559050,TRIAE_CS42_6DS_TGACv1_542583_AA1724790,TRIAE_CS42_3DL_TGACv1_250339_AA0866430,TRIAE_CS42_U_TGACv1_641043_AA2083140,TRIAE_CS42_5AL_TGACv1_378411_AA1253160,TRIAE_CS42_4BL_TGACv1_320261_AA1032800,TRIAE_CS42_1BL_TGACv1_031076_AA0107250,TRIAE_CS42_4BS_TGACv1_328452_AA1088030,TRIAE_CS42_…
GO:0030117	membrane coat	cellular_component	1.8684e-10	6.0969e-09	22	2784	132	74606	TRIAE_CS42_7AL_TGACv1_556695_AA1769100,TRIAE_CS42_5AL_TGACv1_374774_AA1208800,TRIAE_CS42_1DL_TGACv1_061297_AA0191640,TRIAE_CS42_4AS_TGACv1_306421_AA1007900,TRIAE_CS42_4AL_TGACv1_288747_AA0957130,TRIAE_CS42_7AS_TGACv1_571321_AA1846800,TRIAE_CS42_7DS_TGACv1_623122_AA2049790,TRIAE_CS42_1AL_TGACv1_001331_AA0028860,TRIAE_CS42_4DS_TGACv1_362497_AA1180110,TRIAE_CS42_4DS_TGACv1_361471_AA1168550,TRIAE_CS4…
GO:0048475	coated membrane	cellular_component	1.8684e-10	6.0969e-09	22	2784	132	74606	TRIAE_CS42_5AL_TGACv1_378411_AA1253160,TRIAE_CS42_4BL_TGACv1_320261_AA1032800,TRIAE_CS42_1BL_TGACv1_031076_AA0107250,TRIAE_CS42_4BS_TGACv1_328452_AA1088030,TRIAE_CS42_6BS_TGACv1_514683_AA1663200,TRIAE_CS42_6AS_TGACv1_486272_AA1559050,TRIAE_CS42_2DL_TGACv1_158815_AA0526570,TRIAE_CS42_6DS_TGACv1_542583_AA1724790,TRIAE_CS42_U_TGACv1_641043_AA2083140,TRIAE_CS42_4AL_TGACv1_288357_AA0946240,TRIAE_CS42_…
GO:0009163	nucleoside biosynthetic process	biological_process	2.4145e-10	7.8031e-09	29	2784	189	74606	TRIAE_CS42_3B_TGACv1_223258_AA0779170,TRIAE_CS42_4DS_TGACv1_361731_AA1172190,TRIAE_CS42_3DL_TGACv1_249279_AA0843940,TRIAE_CS42_1BL_TGACv1_030377_AA0088540,TRIAE_CS42_5DL_TGACv1_435540_AA1451810,TRIAE_CS42_5BL_TGACv1_406155_AA1341460,TRIAE_CS42_2BL_TGACv1_130381_AA0409970,TRIAE_CS42_6DL_TGACv1_526952_AA1695860,TRIAE_CS42_6DL_TGACv1_526382_AA1681340,TRIAE_CS42_5AL_TGACv1_374789_AA1209000,TRIAE_CS42…
GO:0042455	ribonucleoside biosynthetic process	biological_process	2.4145e-10	7.8031e-09	29	2784	189	74606	TRIAE_CS42_6BL_TGACv1_499360_AA1579440,TRIAE_CS42_6BL_TGACv1_500297_AA1602810,TRIAE_CS42_6AL_TGACv1_473321_AA1530120,TRIAE_CS42_1BL_TGACv1_031692_AA0118950,TRIAE_CS42_6BL_TGACv1_499577_AA1586520,TRIAE_CS42_6AL_TGACv1_475648_AA1536640,TRIAE_CS42_1AS_TGACv1_019145_AA0061580,TRIAE_CS42_1AL_TGACv1_004040_AA0052320,TRIAE_CS42_6DL_TGACv1_526382_AA1681340,TRIAE_CS42_5AL_TGACv1_374789_AA1209000,TRIAE_CS4…
GO:0006261	DNA-dependent DNA replication	biological_process	2.5487e-10	8.1974e-09	20	2784	105	74606	TRIAE_CS42_5BL_TGACv1_405295_AA1324290,TRIAE_CS42_3DL_TGACv1_251082_AA0877230,TRIAE_CS42_1AS_TGACv1_019881_AA0072380,TRIAE_CS42_1DL_TGACv1_063075_AA0223620,TRIAE_CS42_5BS_TGACv1_423792_AA1383390,TRIAE_CS42_5BL_TGACv1_407263_AA1355000,TRIAE_CS42_U_TGACv1_641839_AA2105360,TRIAE_CS42_1BL_TGACv1_031783_AA0120520,TRIAE_CS42_3DL_TGACv1_252076_AA0887540,TRIAE_CS42_2AL_TGACv1_094809_AA0303420,TRIAE_CS42_…
GO:0003735	structural constituent of ribosome	molecular_function	3.2243e-10	1.0321e-08	91	2784	954	74606	TRIAE_CS42_7AS_TGACv1_570551_AA1837520,TRIAE_CS42_2DS_TGACv1_177303_AA0572790,TRIAE_CS42_3B_TGACv1_221721_AA0748350,TRIAE_CS42_6BL_TGACv1_499707_AA1589630,TRIAE_CS42_5AL_TGACv1_374831_AA1209790,TRIAE_CS42_2DL_TGACv1_158421_AA0518370,TRIAE_CS42_2DS_TGACv1_178829_AA0601430,TRIAE_CS42_6AL_TGACv1_471983_AA1516620,TRIAE_CS42_7AL_TGACv1_558276_AA1791880,TRIAE_CS42_7BL_TGACv1_578443_AA1895000,TRIAE_CS42…
GO:0044429	mitochondrial part	cellular_component	3.5892e-10	1.1404e-08	52	2784	454	74606	TRIAE_CS42_4DL_TGACv1_343137_AA1130350,TRIAE_CS42_5AL_TGACv1_376570_AA1238560,TRIAE_CS42_7AS_TGACv1_570442_AA1835740,TRIAE_CS42_7AS_TGACv1_571112_AA1844780,TRIAE_CS42_4BS_TGACv1_329474_AA1101780,TRIAE_CS42_3AL_TGACv1_194730_AA0638300,TRIAE_CS42_1BL_TGACv1_031692_AA0118950,TRIAE_CS42_3B_TGACv1_222757_AA0770040,TRIAE_CS42_3B_TGACv1_223525_AA0783520,TRIAE_CS42_5DL_TGACv1_434321_AA1433910,TRIAE_CS42_…
GO:0003871	5-methyltetrahydropteroyltriglutamate-homocysteine S-methyltransferase activity	molecular_function	3.6136e-10	1.1404e-08	6	2784	6	74606	TRIAE_CS42_5AS_TGACv1_393328_AA1271350,TRIAE_CS42_5DS_TGACv1_456564_AA1474130,TRIAE_CS42_4AL_TGACv1_290117_AA0981910,TRIAE_CS42_4BS_TGACv1_330819_AA1108930,TRIAE_CS42_4DS_TGACv1_361983_AA1175310,TRIAE_CS42_5BS_TGACv1_423584_AA1379990
GO:0042085	5-methyltetrahydropteroyltri-L-glutamate-dependent methyltransferase activity	molecular_function	3.6136e-10	1.1404e-08	6	2784	6	74606	TRIAE_CS42_4DS_TGACv1_361983_AA1175310,TRIAE_CS42_5BS_TGACv1_423584_AA1379990,TRIAE_CS42_4BS_TGACv1_330819_AA1108930,TRIAE_CS42_4AL_TGACv1_290117_AA0981910,TRIAE_CS42_5AS_TGACv1_393328_AA1271350,TRIAE_CS42_5DS_TGACv1_456564_AA1474130
GO:0051649	establishment of localization in cell	biological_process	5.2831e-10	1.6595e-08	79	2784	1057	74606	TRIAE_CS42_7AS_TGACv1_570466_AA1836110,TRIAE_CS42_2AL_TGACv1_093387_AA0279030,TRIAE_CS42_3AL_TGACv1_194057_AA0625630,TRIAE_CS42_4BL_TGACv1_320261_AA1032800,TRIAE_CS42_4BS_TGACv1_328452_AA1088030,TRIAE_CS42_U_TGACv1_641465_AA2095940,TRIAE_CS42_4AL_TGACv1_288357_AA0946240,TRIAE_CS42_2BS_TGACv1_146389_AA0464090,TRIAE_CS42_4BL_TGACv1_321458_AA1060720,TRIAE_CS42_3AS_TGACv1_212111_AA0697830,TRIAE_CS42_…
GO:0015980	energy derivation by oxidation of organic compounds	biological_process	5.5004e-10	1.7197e-08	30	2784	218	74606	TRIAE_CS42_2DS_TGACv1_177436_AA0577070,TRIAE_CS42_2AL_TGACv1_094054_AA0291710,TRIAE_CS42_2BL_TGACv1_129772_AA0395390,TRIAE_CS42_2BL_TGACv1_132202_AA0435990,TRIAE_CS42_5DL_TGACv1_434833_AA1442310,TRIAE_CS42_4DS_TGACv1_361934_AA1174470,TRIAE_CS42_2AS_TGACv1_112747_AA0344470,TRIAE_CS42_1DL_TGACv1_061661_AA0201230,TRIAE_CS42_1BL_TGACv1_031464_AA0114600,AIG90477,TRIAE_CS42_5DL_TGACv1_435303_AA1448600,…
GO:0005840	ribosome	cellular_component	5.61e-10	1.7458e-08	92	2784	981	74606	TRIAE_CS42_4AS_TGACv1_308348_AA1027440,TRIAE_CS42_1AL_TGACv1_004424_AA0053450,TRIAE_CS42_4AL_TGACv1_290631_AA0987660,TRIAE_CS42_6BL_TGACv1_499662_AA1588600,TRIAE_CS42_2BS_TGACv1_145920_AA0449310,TRIAE_CS42_3AL_TGACv1_196895_AA0663580,TRIAE_CS42_4DS_TGACv1_361995_AA1175430,TRIAE_CS42_5AS_TGACv1_394381_AA1279900,TRIAE_CS42_1BS_TGACv1_051009_AA0177220,TRIAE_CS42_7AL_TGACv1_556776_AA1770590,TRIAE_CS4…
GO:0046907	intracellular transport	biological_process	6.2854e-10	1.947e-08	68	2784	841	74606	TRIAE_CS42_7AS_TGACv1_570573_AA1837850,TRIAE_CS42_1BL_TGACv1_031076_AA0107250,TRIAE_CS42_5BL_TGACv1_407080_AA1353120,TRIAE_CS42_5DL_TGACv1_434879_AA1443050,TRIAE_CS42_2DL_TGACv1_160210_AA0548190,TRIAE_CS42_2DL_TGACv1_158815_AA0526570,TRIAE_CS42_6AS_TGACv1_486272_AA1559050,TRIAE_CS42_7BS_TGACv1_593531_AA1952260,TRIAE_CS42_4DS_TGACv1_361471_AA1168550,TRIAE_CS42_4AS_TGACv1_306421_AA1007900,TRIAE_CS4…
GO:0015399	primary active transmembrane transporter activity	molecular_function	6.9691e-10	2.1391e-08	37	2784	399	74606	TRIAE_CS42_3B_TGACv1_221643_AA0746430,TRIAE_CS42_6AS_TGACv1_486953_AA1566790,TRIAE_CS42_2DL_TGACv1_159040_AA0531140,TRIAE_CS42_6BS_TGACv1_514140_AA1655890,TRIAE_CS42_3B_TGACv1_222779_AA0770480,TRIAE_CS42_7DL_TGACv1_603585_AA1986010,TRIAE_CS42_1AL_TGACv1_000051_AA0001340,TRIAE_CS42_3AL_TGACv1_193952_AA0623370,TRIAE_CS42_7AL_TGACv1_558294_AA1792080,TRIAE_CS42_1DL_TGACv1_062210_AA0210500,TRIAE_CS42_…
GO:0015405	P-P-bond-hydrolysis-driven transmembrane transporter activity	molecular_function	6.9691e-10	2.1391e-08	37	2784	399	74606	TRIAE_CS42_6DS_TGACv1_542697_AA1728230,TRIAE_CS42_7BL_TGACv1_577436_AA1875390,TRIAE_CS42_7BL_TGACv1_579063_AA1903600,TRIAE_CS42_3DL_TGACv1_250186_AA0863800,TRIAE_CS42_1BL_TGACv1_031692_AA0118950,TRIAE_CS42_7AL_TGACv1_558294_AA1792080,TRIAE_CS42_3AL_TGACv1_193952_AA0623370,TRIAE_CS42_1DL_TGACv1_062210_AA0210500,TRIAE_CS42_3DS_TGACv1_272407_AA0920320,TRIAE_CS42_3AL_TGACv1_194690_AA0637900,TRIAE_CS4…
GO:0022857	transmembrane transporter activity	molecular_function	9.1079e-10	2.7829e-08	152	2784	2667	74606	TRIAE_CS42_2DL_TGACv1_159221_AA0534770,TRIAE_CS42_3DS_TGACv1_272293_AA0918520,TRIAE_CS42_7DL_TGACv1_603585_AA1986010,TRIAE_CS42_1BL_TGACv1_032462_AA0130150,TRIAE_CS42_5AL_TGACv1_374188_AA1192880,TRIAE_CS42_2DL_TGACv1_158421_AA0518370,TRIAE_CS42_3DS_TGACv1_271874_AA0909920,TRIAE_CS42_3AL_TGACv1_193642_AA0616060,TRIAE_CS42_2AL_TGACv1_093704_AA0285430,TRIAE_CS42_3AL_TGACv1_193952_AA0623370,TRIAE_CS4…
GO:0043603	cellular amide metabolic process	biological_process	9.9357e-10	3.0221e-08	133	2784	1844	74606	TRIAE_CS42_4DL_TGACv1_342840_AA1123400,TRIAE_CS42_2BL_TGACv1_129567_AA0388870,TRIAE_CS42_4DS_TGACv1_362974_AA1182930,TRIAE_CS42_2AL_TGACv1_096378_AA0318970,TRIAE_CS42_5AL_TGACv1_377520_AA1247660,TRIAE_CS42_1BL_TGACv1_030850_AA0102280,TRIAE_CS42_2DS_TGACv1_179544_AA0607840,TRIAE_CS42_5DL_TGACv1_433267_AA1407590,TRIAE_CS42_2BL_TGACv1_133208_AA0441860,TRIAE_CS42_2DL_TGACv1_164978_AA0565010,TRIAE_CS4…
GO:0042451	purine nucleoside biosynthetic process	biological_process	1.0027e-09	3.0225e-08	26	2784	161	74606	TRIAE_CS42_6AL_TGACv1_473321_AA1530120,TRIAE_CS42_1BL_TGACv1_031692_AA0118950,TRIAE_CS42_6BL_TGACv1_499577_AA1586520,TRIAE_CS42_6AL_TGACv1_475648_AA1536640,TRIAE_CS42_1AS_TGACv1_019145_AA0061580,TRIAE_CS42_1AL_TGACv1_004040_AA0052320,TRIAE_CS42_6DL_TGACv1_526382_AA1681340,TRIAE_CS42_6DL_TGACv1_526952_AA1695860,TRIAE_CS42_5AL_TGACv1_374789_AA1209000,TRIAE_CS42_6BL_TGACv1_500297_AA1602810,TRIAE_CS4…
GO:0046129	purine ribonucleoside biosynthetic process	biological_process	1.0027e-09	3.0225e-08	26	2784	161	74606	TRIAE_CS42_5DL_TGACv1_435540_AA1451810,TRIAE_CS42_1BL_TGACv1_030377_AA0088540,TRIAE_CS42_4DS_TGACv1_361731_AA1172190,TRIAE_CS42_2BL_TGACv1_130381_AA0409970,TRIAE_CS42_5BL_TGACv1_406155_AA1341460,TRIAE_CS42_6AL_TGACv1_475648_AA1536640,TRIAE_CS42_1AS_TGACv1_019145_AA0061580,TRIAE_CS42_1AL_TGACv1_004040_AA0052320,TRIAE_CS42_1BL_TGACv1_031692_AA0118950,TRIAE_CS42_6AL_TGACv1_473321_AA1530120,TRIAE_CS4…
GO:0072522	purine-containing compound biosynthetic process	biological_process	1.0594e-09	3.1791e-08	30	2784	218	74606	TRIAE_CS42_1AL_TGACv1_002629_AA0043900,TRIAE_CS42_1DL_TGACv1_062210_AA0210500,TRIAE_CS42_3AS_TGACv1_213440_AA0706960,TRIAE_CS42_1DL_TGACv1_061176_AA0187850,TRIAE_CS42_6BL_TGACv1_499716_AA1589820,TRIAE_CS42_2AL_TGACv1_095324_AA0309650,TRIAE_CS42_2DL_TGACv1_158421_AA0518370,TRIAE_CS42_1AL_TGACv1_000051_AA0001340,TRIAE_CS42_3B_TGACv1_223441_AA0782230,TRIAE_CS42_6DL_TGACv1_528171_AA1712170,TRIAE_CS42…
GO:0005794	Golgi apparatus	cellular_component	1.0761e-09	3.2148e-08	58	2784	708	74606	TRIAE_CS42_U_TGACv1_644844_AA2141960,TRIAE_CS42_7DL_TGACv1_602635_AA1963430,TRIAE_CS42_4BL_TGACv1_321458_AA1060720,TRIAE_CS42_3AS_TGACv1_212111_AA0697830,TRIAE_CS42_4DS_TGACv1_361471_AA1168550,TRIAE_CS42_7BS_TGACv1_592783_AA1944260,TRIAE_CS42_2AL_TGACv1_096831_AA0321630,TRIAE_CS42_4BS_TGACv1_328464_AA1088220,TRIAE_CS42_7DS_TGACv1_623122_AA2049790,TRIAE_CS42_3B_TGACv1_225872_AA0812520,TRIAE_CS42_3…
GO:0016615	malate dehydrogenase activity	molecular_function	1.137e-09	3.3819e-08	13	2784	42	74606	TRIAE_CS42_1AL_TGACv1_000369_AA0010430,TRIAE_CS42_3DL_TGACv1_249199_AA0841000,TRIAE_CS42_1BL_TGACv1_030950_AA0104200,TRIAE_CS42_2AS_TGACv1_112185_AA0332560,TRIAE_CS42_1BL_TGACv1_031464_AA0114600,TRIAE_CS42_1DL_TGACv1_061661_AA0201230,TRIAE_CS42_1AL_TGACv1_002631_AA0043990,TRIAE_CS42_7BL_TGACv1_578344_AA1893330,TRIAE_CS42_1DL_TGACv1_062583_AA0216850,TRIAE_CS42_1BL_TGACv1_030411_AA0089860,TRIAE_CS4…
GO:0016469	proton-transporting two-sector ATPase complex	cellular_component	1.1582e-09	3.4296e-08	24	2784	127	74606	TRIAE_CS42_1AL_TGACv1_000051_AA0001340,TRIAE_CS42_2DL_TGACv1_158421_AA0518370,TRIAE_CS42_2AL_TGACv1_095324_AA0309650,TRIAE_CS42_7DL_TGACv1_603800_AA1989460,TRIAE_CS42_7AL_TGACv1_558294_AA1792080,TRIAE_CS42_3AL_TGACv1_194690_AA0637900,TRIAE_CS42_1DL_TGACv1_062210_AA0210500,TRIAE_CS42_3DS_TGACv1_272407_AA0920320,TRIAE_CS42_1AL_TGACv1_002629_AA0043900,TRIAE_CS42_3AL_TGACv1_195562_AA0651220,TRIAE_CS4…
GO:0006412	translation	biological_process	1.299e-09	3.8298e-08	123	2784	1646	74606	TRIAE_CS42_4AS_TGACv1_308228_AA1026790,TRIAE_CS42_6BL_TGACv1_502287_AA1624100,TRIAE_CS42_7BL_TGACv1_577301_AA1871640,TRIAE_CS42_1AS_TGACv1_019223_AA0063510,TRIAE_CS42_3DL_TGACv1_249293_AA0844440,TRIAE_CS42_3AL_TGACv1_198285_AA0668310,TRIAE_CS42_2BS_TGACv1_146026_AA0453440,TRIAE_CS42_6AS_TGACv1_485212_AA1540270,TRIAE_CS42_7BS_TGACv1_592265_AA1934530,TRIAE_CS42_7DL_TGACv1_602775_AA1968270,TRIAE_CS4…
GO:0031966	mitochondrial membrane	cellular_component	1.352e-09	3.9686e-08	42	2784	331	74606	TRIAE_CS42_4AS_TGACv1_306930_AA1015160,TRIAE_CS42_1AL_TGACv1_000051_AA0001340,TRIAE_CS42_2DL_TGACv1_158421_AA0518370,TRIAE_CS42_5DL_TGACv1_434833_AA1442310,TRIAE_CS42_1DL_TGACv1_062210_AA0210500,TRIAE_CS42_1AL_TGACv1_002629_AA0043900,TRIAE_CS42_U_TGACv1_643044_AA2126510,TRIAE_CS42_4AS_TGACv1_306355_AA1006860,TRIAE_CS42_2DL_TGACv1_159701_AA0541660,TRIAE_CS42_3DL_TGACv1_252453_AA0890080,TRIAE_CS42_…
GO:0006730	one-carbon metabolic process	biological_process	1.6142e-09	4.7176e-08	15	2784	58	74606	TRIAE_CS42_6BL_TGACv1_500297_AA1602810,TRIAE_CS42_4DS_TGACv1_362836_AA1182360,TRIAE_CS42_2AL_TGACv1_094486_AA0298610,TRIAE_CS42_2AL_TGACv1_094077_AA0292200,TRIAE_CS42_2DL_TGACv1_158777_AA0526010,TRIAE_CS42_2BL_TGACv1_129567_AA0388870,TRIAE_CS42_2AL_TGACv1_094077_AA0292210,TRIAE_CS42_6AL_TGACv1_475648_AA1536640,TRIAE_CS42_6BL_TGACv1_499577_AA1586520,TRIAE_CS42_6DL_TGACv1_526382_AA1681340,TRIAE_CS4…
GO:0003674	molecular_function	molecular_function	1.8681e-09	5.4361e-08	2320	2784	60525	74606	TRIAE_CS42_2DS_TGACv1_177886_AA0586580,TRIAE_CS42_6BL_TGACv1_499717_AA1589860,TRIAE_CS42_1BL_TGACv1_031563_AA0116220,TRIAE_CS42_5DL_TGACv1_432987_AA1396960,TRIAE_CS42_1BL_TGACv1_030287_AA0085450,TRIAE_CS42_4BS_TGACv1_330819_AA1108930,TRIAE_CS42_2BL_TGACv1_129333_AA0379170,TRIAE_CS42_5DL_TGACv1_432975_AA1396470,TRIAE_CS42_U_TGACv1_642255_AA2114320,TRIAE_CS42_5BL_TGACv1_404935_AA1315570,TRIAE_CS42_…
2_3DS_TGACv1_271475_AA0899660,TRIAE_CS42_1AS_TGACv1_019292_AA0064460,TRIAE_CS42_5BL_TGACv1_404599_AA1305700,TRIAE_CS42_5BL_TGACv1_407460_AA1357140,TRIAE_CS42_3B_TGACv1_222302_AA0761700,TRIAE_CS42_3AL_TGACv1_195702_AA0652890,TRIAE_CS42_3DS_TGACv1_272307_AA0918700,TRIAE_CS42_7BL_TGACv1_576755_AA1853830,TRIAE_CS42_4BL_TGACv1_320896_AA1051070,TRIAE_CS42_7BS_TGACv1_593884_AA1954980,TRIAE_CS42_2AL_TGAC…
S42_U_TGACv1_645225_AA2143600,TRIAE_CS42_4BS_TGACv1_329699_AA1103360,TRIAE_CS42_2BS_TGACv1_145920_AA0449310,TRIAE_CS42_3DS_TGACv1_271947_AA0911510,TRIAE_CS42_5AL_TGACv1_375143_AA1216900,TRIAE_CS42_1AL_TGACv1_001479_AA0031070,TRIAE_CS42_6AL_TGACv1_472754_AA1525620,TRIAE_CS42_U_TGACv1_641317_AA2091700,TRIAE_CS42_2BS_TGACv1_146093_AA0455120,TRIAE_CS42_4DL_TGACv1_343749_AA1139150,TRIAE_CS42_2DS_TGACv…
GO:1901607	alpha-amino acid biosynthetic process	biological_process	2.0011e-09	5.7981e-08	39	2784	368	74606	TRIAE_CS42_2DS_TGACv1_179678_AA0608530,TRIAE_CS42_7DS_TGACv1_624143_AA2059180,TRIAE_CS42_5DL_TGACv1_434775_AA1441440,TRIAE_CS42_4DL_TGACv1_343385_AA1133850,TRIAE_CS42_3B_TGACv1_220588_AA0709800,TRIAE_CS42_4DS_TGACv1_362836_AA1182360,TRIAE_CS42_2BS_TGACv1_146384_AA0464010,TRIAE_CS42_4BL_TGACv1_322214_AA1069720,TRIAE_CS42_5DS_TGACv1_456564_AA1474130,TRIAE_CS42_5AS_TGACv1_393328_AA1271350,TRIAE_CS42…
GO:0008652	cellular amino acid biosynthetic process	biological_process	2.0694e-09	5.97e-08	43	2784	432	74606	TRIAE_CS42_2BL_TGACv1_130544_AA0413270,TRIAE_CS42_U_TGACv1_641465_AA2095880,TRIAE_CS42_U_TGACv1_641020_AA2082360,TRIAE_CS42_3AS_TGACv1_211963_AA0696070,TRIAE_CS42_5BL_TGACv1_404165_AA1287780,TRIAE_CS42_2DL_TGACv1_160628_AA0552420,TRIAE_CS42_1AL_TGACv1_001479_AA0031070,TRIAE_CS42_4AL_TGACv1_290117_AA0981910,TRIAE_CS42_7BL_TGACv1_577759_AA1882740,TRIAE_CS42_1AL_TGACv1_000254_AA0007370,TRIAE_CS42_4B…
GO:0072330	monocarboxylic acid biosynthetic process	biological_process	2.1517e-09	6.181e-08	43	2784	433	74606	TRIAE_CS42_4BS_TGACv1_328160_AA1083740,TRIAE_CS42_7BS_TGACv1_591992_AA1927520,TRIAE_CS42_7AL_TGACv1_559693_AA1800520,TRIAE_CS42_5BL_TGACv1_404481_AA1301440,TRIAE_CS42_6DL_TGACv1_526391_AA1681850,TRIAE_CS42_2DL_TGACv1_162478_AA0562870,TRIAE_CS42_5AL_TGACv1_374394_AA1198750,TRIAE_CS42_2BL_TGACv1_129564_AA0388780,TRIAE_CS42_2DS_TGACv1_178051_AA0589900,TRIAE_CS42_7DL_TGACv1_604116_AA1994020,TRIAE_CS4…
GO:0043043	peptide biosynthetic process	biological_process	2.3552e-09	6.7368e-08	123	2784	1667	74606	TRIAE_CS42_7AS_TGACv1_570551_AA1837520,TRIAE_CS42_1DL_TGACv1_062576_AA0216780,TRIAE_CS42_6DS_TGACv1_543529_AA1741250,TRIAE_CS42_U_TGACv1_642463_AA2118090,TRIAE_CS42_4BL_TGACv1_320923_AA1051800,TRIAE_CS42_5DL_TGACv1_433411_AA1412390,TRIAE_CS42_2DS_TGACv1_177303_AA0572790,TRIAE_CS42_3B_TGACv1_221721_AA0748350,TRIAE_CS42_7AL_TGACv1_558276_AA1791880,TRIAE_CS42_7BL_TGACv1_578443_AA1895000,TRIAE_CS42_1…
GO:0005773	vacuole	cellular_component	2.371e-09	6.7534e-08	43	2784	436	74606	TRIAE_CS42_4DL_TGACv1_343812_AA1140000,TRIAE_CS42_3AL_TGACv1_195124_AA0645060,TRIAE_CS42_4BL_TGACv1_321702_AA1064290,TRIAE_CS42_4BS_TGACv1_329474_AA1101780,TRIAE_CS42_1DL_TGACv1_061713_AA0202170,TRIAE_CS42_4DL_TGACv1_342471_AA1114460,TRIAE_CS42_U_TGACv1_641505_AA2096780,TRIAE_CS42_4DS_TGACv1_361383_AA1166600,TRIAE_CS42_4AL_TGACv1_291894_AA0996930,TRIAE_CS42_7BS_TGACv1_592090_AA1930300,TRIAE_CS42_…
GO:0015979	photosynthesis	biological_process	2.4134e-09	6.8451e-08	50	2784	437	74606	TRIAE_CS42_1AL_TGACv1_009365_AA0055660,TRIAE_CS42_1DL_TGACv1_061593_AA0199390,TRIAE_CS42_5BL_TGACv1_404454_AA1300370,TRIAE_CS42_1BL_TGACv1_033509_AA0140020,TRIAE_CS42_7AS_TGACv1_569064_AA1806110,TRIAE_CS42_1DL_TGACv1_061593_AA0199400,TRIAE_CS42_5AL_TGACv1_378876_AA1254920,TRIAE_CS42_2AL_TGACv1_096183_AA0317660,TRIAE_CS42_5DL_TGACv1_434747_AA1440950,TRIAE_CS42_6BS_TGACv1_514208_AA1656990,TRIAE_CS4…
GO:1901605	alpha-amino acid metabolic process	biological_process	2.4987e-09	7.0573e-08	51	2784	573	74606	TRIAE_CS42_3B_TGACv1_223258_AA0779170,TRIAE_CS42_3DL_TGACv1_249279_AA0843940,TRIAE_CS42_2DL_TGACv1_159916_AA0544360,TRIAE_CS42_2AL_TGACv1_094077_AA0292210,TRIAE_CS42_2AL_TGACv1_094486_AA0298610,TRIAE_CS42_7AL_TGACv1_557898_AA1787490,TRIAE_CS42_4AS_TGACv1_307728_AA1023060,TRIAE_CS42_U_TGACv1_654540_AA2150720,TRIAE_CS42_5BS_TGACv1_423584_AA1379990,TRIAE_CS42_4DL_TGACv1_343985_AA1142210,TRIAE_CS42_4…
GO:0006520	cellular amino acid metabolic process	biological_process	2.6311e-09	7.3958e-08	76	2784	1048	74606	TRIAE_CS42_6DL_TGACv1_527226_AA1700820,TRIAE_CS42_2BS_TGACv1_146384_AA0464010,TRIAE_CS42_4BL_TGACv1_322214_AA1069720,TRIAE_CS42_5AS_TGACv1_393328_AA1271350,TRIAE_CS42_5DS_TGACv1_456564_AA1474130,TRIAE_CS42_3B_TGACv1_220588_AA0709800,TRIAE_CS42_4DS_TGACv1_362836_AA1182360,TRIAE_CS42_5AL_TGACv1_376960_AA1242750,TRIAE_CS42_2DS_TGACv1_179678_AA0608530,TRIAE_CS42_3DS_TGACv1_272233_AA0917470,TRIAE_CS42…
GO:0042626	ATPase activity, coupled to transmembrane movement of substances	molecular_function	2.6406e-09	7.3958e-08	34	2784	371	74606	TRIAE_CS42_1BL_TGACv1_031692_AA0118950,TRIAE_CS42_7BL_TGACv1_577436_AA1875390,TRIAE_CS42_7BL_TGACv1_579063_AA1903600,TRIAE_CS42_3DL_TGACv1_250186_AA0863800,TRIAE_CS42_3B_TGACv1_221643_AA0746430,TRIAE_CS42_2DL_TGACv1_159040_AA0531140,TRIAE_CS42_3B_TGACv1_222779_AA0770480,TRIAE_CS42_7DL_TGACv1_603585_AA1986010,TRIAE_CS42_1AL_TGACv1_000051_AA0001340,TRIAE_CS42_7AL_TGACv1_558294_AA1792080,TRIAE_CS42_…
GO:0006099	tricarboxylic acid cycle	biological_process	3.2563e-09	9.0826e-08	19	2784	105	74606	TRIAE_CS42_7BL_TGACv1_578344_AA1893330,TRIAE_CS42_5DL_TGACv1_433363_AA1410880,TRIAE_CS42_1AL_TGACv1_000087_AA0002830,TRIAE_CS42_4DS_TGACv1_362069_AA1176360,TRIAE_CS42_7BL_TGACv1_578944_AA1902350,TRIAE_CS42_2DL_TGACv1_159084_AA0532060,TRIAE_CS42_1BL_TGACv1_030950_AA0104200,TRIAE_CS42_5BL_TGACv1_407230_AA1354660,TRIAE_CS42_3DL_TGACv1_249199_AA0841000,TRIAE_CS42_5DL_TGACv1_434321_AA1433910,TRIAE_CS4…
GO:0043492	ATPase activity, coupled to movement of substances	molecular_function	3.4321e-09	9.5332e-08	35	2784	398	74606	TRIAE_CS42_2DL_TGACv1_159040_AA0531140,TRIAE_CS42_3B_TGACv1_222779_AA0770480,TRIAE_CS42_3B_TGACv1_221643_AA0746430,TRIAE_CS42_3AL_TGACv1_195562_AA0651220,TRIAE_CS42_7DS_TGACv1_621709_AA2023980,TRIAE_CS42_3AL_TGACv1_193952_AA0623370,TRIAE_CS42_7AL_TGACv1_558294_AA1792080,TRIAE_CS42_3AL_TGACv1_194690_AA0637900,TRIAE_CS42_3DS_TGACv1_272407_AA0920320,TRIAE_CS42_1DL_TGACv1_062210_AA0210500,TRIAE_CS42_…
GO:0016820	hydrolase activity, acting on acid anhydrides, catalyzing transmembrane movement of substances	molecular_function	3.5874e-09	9.9237e-08	34	2784	373	74606	TRIAE_CS42_1DL_TGACv1_062210_AA0210500,TRIAE_CS42_3DS_TGACv1_272407_AA0920320,TRIAE_CS42_3AL_TGACv1_194690_AA0637900,TRIAE_CS42_7AL_TGACv1_558294_AA1792080,TRIAE_CS42_3AL_TGACv1_193952_AA0623370,TRIAE_CS42_7DS_TGACv1_621709_AA2023980,TRIAE_CS42_3AL_TGACv1_195562_AA0651220,TRIAE_CS42_7DL_TGACv1_603585_AA1986010,TRIAE_CS42_1AL_TGACv1_000051_AA0001340,TRIAE_CS42_3B_TGACv1_222779_AA0770480,TRIAE_CS42…
GO:0016887	ATPase activity	molecular_function	3.6606e-09	1.0085e-07	58	2784	848	74606	TRIAE_CS42_3B_TGACv1_222779_AA0770480,TRIAE_CS42_2DL_TGACv1_159040_AA0531140,TRIAE_CS42_5BL_TGACv1_405295_AA1324290,TRIAE_CS42_3DL_TGACv1_249892_AA0858230,TRIAE_CS42_3B_TGACv1_221643_AA0746430,TRIAE_CS42_3B_TGACv1_223576_AA0784150,TRIAE_CS42_3AL_TGACv1_195562_AA0651220,TRIAE_CS42_7DS_TGACv1_621709_AA2023980,TRIAE_CS42_1DL_TGACv1_062210_AA0210500,TRIAE_CS42_3AL_TGACv1_194690_AA0637900,TRIAE_CS42_3…
GO:0051641	cellular localization	biological_process	3.9355e-09	1.0777e-07	80	2784	1125	74606	TRIAE_CS42_5BS_TGACv1_424367_AA1389100,TRIAE_CS42_4AL_TGACv1_288747_AA0957130,TRIAE_CS42_3DS_TGACv1_272355_AA0919480,TRIAE_CS42_3B_TGACv1_223093_AA0776380,TRIAE_CS42_1DL_TGACv1_061297_AA0191640,TRIAE_CS42_6DL_TGACv1_526657_AA1689120,TRIAE_CS42_4BL_TGACv1_321458_AA1060720,TRIAE_CS42_3AS_TGACv1_212111_AA0697830,TRIAE_CS42_7DL_TGACv1_602635_AA1963430,TRIAE_CS42_4BL_TGACv1_321242_AA1057770,TRIAE_CS42…
GO:0044765	single-organism transport	biological_process	3.944e-09	1.0777e-07	239	2784	4585	74606	TRIAE_CS42_2DL_TGACv1_158753_AA0525450,TRIAE_CS42_7DS_TGACv1_623756_AA2055850,TRIAE_CS42_3B_TGACv1_221643_AA0746430,TRIAE_CS42_2DL_TGACv1_159040_AA0531140,TRIAE_CS42_3AL_TGACv1_196872_AA0663430,TRIAE_CS42_2DL_TGACv1_158910_AA0528600,TRIAE_CS42_5DL_TGACv1_434833_AA1442310,TRIAE_CS42_6DL_TGACv1_528046_AA1711090,TRIAE_CS42_5DL_TGACv1_434589_AA1438400,TRIAE_CS42_5AL_TGACv1_377443_AA1246870,TRIAE_CS42…
GO:0043604	amide biosynthetic process	biological_process	4.6366e-09	1.2618e-07	125	2784	1733	74606	TRIAE_CS42_2DL_TGACv1_164978_AA0565010,TRIAE_CS42_3DL_TGACv1_251896_AA0885850,TRIAE_CS42_2AS_TGACv1_112674_AA0343230,TRIAE_CS42_2DL_TGACv1_162453_AA0562830,TRIAE_CS42_7DL_TGACv1_602775_AA1968270,TRIAE_CS42_4DL_TGACv1_343812_AA1140000,TRIAE_CS42_2BS_TGACv1_146026_AA0453440,TRIAE_CS42_6AS_TGACv1_485212_AA1540270,TRIAE_CS42_3AL_TGACv1_198285_AA0668310,TRIAE_CS42_7BS_TGACv1_592265_AA1934530,TRIAE_CS4…
GO:0006101	citrate metabolic process	biological_process	4.7662e-09	1.2919e-07	19	2784	108	74606	TRIAE_CS42_6AL_TGACv1_474572_AA1535460,TRIAE_CS42_3B_TGACv1_223879_AA0788930,TRIAE_CS42_2BL_TGACv1_132202_AA0435990,TRIAE_CS42_2BL_TGACv1_129772_AA0395390,TRIAE_CS42_2AL_TGACv1_094054_AA0291710,TRIAE_CS42_1BL_TGACv1_031464_AA0114600,TRIAE_CS42_1DL_TGACv1_061661_AA0201230,TRIAE_CS42_5DL_TGACv1_433363_AA1410880,TRIAE_CS42_7BL_TGACv1_578344_AA1893330,TRIAE_CS42_1AL_TGACv1_000087_AA0002830,TRIAE_CS42…
GO:0019866	organelle inner membrane	cellular_component	5.4428e-09	1.467e-07	37	2784	292	74606	TRIAE_CS42_4AL_TGACv1_288275_AA0943380,TRIAE_CS42_3AL_TGACv1_195582_AA0651530,TRIAE_CS42_5BL_TGACv1_406546_AA1346870,TRIAE_CS42_4BS_TGACv1_329699_AA1103360,TRIAE_CS42_2AL_TGACv1_095324_AA0309650,TRIAE_CS42_1DL_TGACv1_062818_AA0220440,TRIAE_CS42_4DL_TGACv1_342742_AA1120750,TRIAE_CS42_6BL_TGACv1_501539_AA1618480,TRIAE_CS42_4DS_TGACv1_361934_AA1174470,TRIAE_CS42_2AL_TGACv1_094127_AA0292960,TRIAE_CS4…
GO:0006006	glucose metabolic process	biological_process	5.456e-09	1.467e-07	14	2784	56	74606	TRIAE_CS42_1DS_TGACv1_081340_AA0260080,TRIAE_CS42_3AL_TGACv1_196039_AA0656760,TRIAE_CS42_6BL_TGACv1_502089_AA1623000,TRIAE_CS42_6AL_TGACv1_473088_AA1528560,TRIAE_CS42_2BS_TGACv1_145925_AA0449700,TRIAE_CS42_2AS_TGACv1_112635_AA0342690,TRIAE_CS42_6BS_TGACv1_515835_AA1672680,TRIAE_CS42_6DS_TGACv1_542766_AA1729850,TRIAE_CS42_6AS_TGACv1_487743_AA1572700,TRIAE_CS42_6DL_TGACv1_527365_AA1702830,TRIAE_CS4…
GO:1902578	single-organism localization	biological_process	6.6328e-09	1.7763e-07	240	2784	4639	74606	TRIAE_CS42_4DS_TGACv1_361391_AA1166860,TRIAE_CS42_2BS_TGACv1_146165_AA0457230,TRIAE_CS42_5BL_TGACv1_405292_AA1324160,TRIAE_CS42_1BL_TGACv1_031692_AA0118950,TRIAE_CS42_1BL_TGACv1_031047_AA0106660,TRIAE_CS42_3AL_TGACv1_194730_AA0638300,TRIAE_CS42_7BL_TGACv1_579063_AA1903600,TRIAE_CS42_3DL_TGACv1_250186_AA0863800,TRIAE_CS42_3DS_TGACv1_272832_AA0925630,TRIAE_CS42_7BL_TGACv1_577436_AA1875390,TRIAE_CS4…
GO:0055085	transmembrane transport	biological_process	7.2933e-09	1.9454e-07	167	2784	3074	74606	TRIAE_CS42_2DL_TGACv1_159040_AA0531140,TRIAE_CS42_7DS_TGACv1_623756_AA2055850,TRIAE_CS42_3B_TGACv1_221643_AA0746430,TRIAE_CS42_2AS_TGACv1_112170_AA0332300,TRIAE_CS42_1DL_TGACv1_062210_AA0210500,TRIAE_CS42_3DS_TGACv1_272407_AA0920320,TRIAE_CS42_5DL_TGACv1_434833_AA1442310,TRIAE_CS42_2DL_TGACv1_158910_AA0528600,TRIAE_CS42_5DL_TGACv1_434589_AA1438400,TRIAE_CS42_6DL_TGACv1_528046_AA1711090,TRIAE_CS42…
GO:0005740	mitochondrial envelope	cellular_component	7.5478e-09	2.0054e-07	43	2784	362	74606	TRIAE_CS42_3B_TGACv1_223525_AA0783520,TRIAE_CS42_5DL_TGACv1_434321_AA1433910,TRIAE_CS42_4AS_TGACv1_307078_AA1016740,TRIAE_CS42_4DL_TGACv1_345404_AA1153060,TRIAE_CS42_7AS_TGACv1_570442_AA1835740,TRIAE_CS42_7AS_TGACv1_571112_AA1844780,TRIAE_CS42_4DL_TGACv1_343137_AA1130350,TRIAE_CS42_4BS_TGACv1_329474_AA1101780,TRIAE_CS42_3AL_TGACv1_194730_AA0638300,TRIAE_CS42_1BL_TGACv1_031692_AA0118950,TRIAE_CS42…
GO:0006518	peptide metabolic process	biological_process	8.4467e-09	2.2354e-07	124	2784	1726	74606	TRIAE_CS42_7BL_TGACv1_577301_AA1871640,TRIAE_CS42_4AS_TGACv1_308228_AA1026790,TRIAE_CS42_6BL_TGACv1_502287_AA1624100,TRIAE_CS42_6AS_TGACv1_485212_AA1540270,TRIAE_CS42_2BS_TGACv1_146026_AA0453440,TRIAE_CS42_3AL_TGACv1_198285_AA0668310,TRIAE_CS42_7BS_TGACv1_592265_AA1934530,TRIAE_CS42_1AS_TGACv1_019223_AA0063510,TRIAE_CS42_3DL_TGACv1_249293_AA0844440,TRIAE_CS42_2DL_TGACv1_162453_AA0562830,TRIAE_CS4…
GO:0005215	transporter activity	molecular_function	8.5499e-09	2.2538e-07	159	2784	2926	74606	TRIAE_CS42_7AL_TGACv1_557109_AA1776600,TRIAE_CS42_1AL_TGACv1_001462_AA0030900,TRIAE_CS42_6AS_TGACv1_486953_AA1566790,TRIAE_CS42_3B_TGACv1_224979_AA0803850,TRIAE_CS42_3DL_TGACv1_249692_AA0854470,TRIAE_CS42_3B_TGACv1_222779_AA0770480,TRIAE_CS42_7BS_TGACv1_594198_AA1956600,TRIAE_CS42_3AL_TGACv1_195562_AA0651220,TRIAE_CS42_1AL_TGACv1_002629_AA0043900,TRIAE_CS42_7AL_TGACv1_558294_AA1792080,TRIAE_CS42_…
GO:0008237	metallopeptidase activity	molecular_function	8.6158e-09	2.2623e-07	31	2784	275	74606	TRIAE_CS42_3B_TGACv1_225805_AA0811930,TRIAE_CS42_4AS_TGACv1_306711_AA1012310,TRIAE_CS42_7DL_TGACv1_604164_AA1994640,TRIAE_CS42_4DL_TGACv1_342605_AA1117760,TRIAE_CS42_4BS_TGACv1_328833_AA1094200,TRIAE_CS42_3DL_TGACv1_249891_AA0858210,TRIAE_CS42_4AL_TGACv1_289060_AA0964280,TRIAE_CS42_4AS_TGACv1_306710_AA1012280,TRIAE_CS42_3AL_TGACv1_194555_AA0635620,TRIAE_CS42_4DL_TGACv1_345966_AA1154850,TRIAE_CS42…
GO:0015991	ATP hydrolysis coupled proton transport	biological_process	9.4642e-09	2.4658e-07	16	2784	68	74606	TRIAE_CS42_U_TGACv1_642696_AA2121820,TRIAE_CS42_6BS_TGACv1_514088_AA1654890,TRIAE_CS42_7AL_TGACv1_558464_AA1793580,TRIAE_CS42_3B_TGACv1_221643_AA0746430,TRIAE_CS42_1AL_TGACv1_001462_AA0030900,TRIAE_CS42_7DL_TGACv1_603800_AA1989460,TRIAE_CS42_7AL_TGACv1_558294_AA1792080,TRIAE_CS42_3AL_TGACv1_194690_AA0637900,TRIAE_CS42_3DS_TGACv1_272407_AA0920320,TRIAE_CS42_3AL_TGACv1_195562_AA0651220,TRIAE_CS42_7…
GO:0090662	ATP hydrolysis coupled transmembrane transport	biological_process	9.4642e-09	2.4658e-07	16	2784	68	74606	TRIAE_CS42_7DL_TGACv1_603800_AA1989460,TRIAE_CS42_7AL_TGACv1_558294_AA1792080,TRIAE_CS42_3DS_TGACv1_272407_AA0920320,TRIAE_CS42_3AL_TGACv1_194690_AA0637900,TRIAE_CS42_3AL_TGACv1_195562_AA0651220,TRIAE_CS42_3B_TGACv1_221643_AA0746430,TRIAE_CS42_6BS_TGACv1_514088_AA1654890,TRIAE_CS42_U_TGACv1_642696_AA2121820,TRIAE_CS42_7AL_TGACv1_558464_AA1793580,TRIAE_CS42_1AL_TGACv1_001462_AA0030900,TRIAE_CS42_3…
GO:0042555	MCM complex	cellular_component	1.0068e-08	2.6129e-07	8	2784	17	74606	TRIAE_CS42_6BL_TGACv1_499834_AA1592800,TRIAE_CS42_6DL_TGACv1_527835_AA1709090,TRIAE_CS42_5AS_TGACv1_393478_AA1272980,TRIAE_CS42_1AS_TGACv1_019881_AA0072380,TRIAE_CS42_3B_TGACv1_224285_AA0794840,TRIAE_CS42_5DS_TGACv1_457219_AA1483870,TRIAE_CS42_5BS_TGACv1_423792_AA1383390,TRIAE_CS42_3DL_TGACv1_252076_AA0887540
GO:0004373	glycogen (starch) synthase activity	molecular_function	1.1147e-08	2.8819e-07	9	2784	24	74606	TRIAE_CS42_1DL_TGACv1_062182_AA0210070,TRIAE_CS42_2BL_TGACv1_131141_AA0423210,TRIAE_CS42_2DL_TGACv1_159587_AA0540290,TRIAE_CS42_2AL_TGACv1_093163_AA0273760,TRIAE_CS42_1BL_TGACv1_031136_AA0108420,TRIAE_CS42_1BL_TGACv1_030553_AA0093880,TRIAE_CS42_1AL_TGACv1_000384_AA0010710,TRIAE_CS42_6BL_TGACv1_501591_AA1619110,TRIAE_CS42_2BL_TGACv1_131614_AA0429850
GO:0030337	DNA polymerase processivity factor activity	molecular_function	1.1194e-08	2.883e-07	7	2784	10	74606	TRIAE_CS42_2AL_TGACv1_096359_AA0318830,TRIAE_CS42_6AL_TGACv1_473573_AA1531820,TRIAE_CS42_6BL_TGACv1_500113_AA1599290,TRIAE_CS42_4BL_TGACv1_321351_AA1059370,TRIAE_CS42_2BL_TGACv1_131506_AA0428640,TRIAE_CS42_2DL_TGACv1_159200_AA0534260,TRIAE_CS42_6DL_TGACv1_526389_AA1681790
GO:0015988	energy coupled proton transmembrane transport, against electrochemical gradient	biological_process	1.1689e-08	2.9991e-07	16	2784	69	74606	TRIAE_CS42_3B_TGACv1_224031_AA0791230,TRIAE_CS42_7BL_TGACv1_579860_AA1910590,TRIAE_CS42_3DL_TGACv1_250717_AA0872310,TRIAE_CS42_7BL_TGACv1_579063_AA1903600,TRIAE_CS42_5DL_TGACv1_436184_AA1459030,TRIAE_CS42_7AL_TGACv1_559344_AA1799200,TRIAE_CS42_7DL_TGACv1_603800_AA1989460,TRIAE_CS42_3DS_TGACv1_272407_AA0920320,TRIAE_CS42_3AL_TGACv1_194690_AA0637900,TRIAE_CS42_7AL_TGACv1_558294_AA1792080,TRIAE_CS42…
GO:0006644	phospholipid metabolic process	biological_process	1.4948e-08	3.8206e-07	36	2784	377	74606	TRIAE_CS42_2BS_TGACv1_146181_AA0457580,TRIAE_CS42_6AS_TGACv1_485300_AA1542750,TRIAE_CS42_1BL_TGACv1_032207_AA0126810,TRIAE_CS42_4AL_TGACv1_288281_AA0943580,TRIAE_CS42_4BL_TGACv1_320456_AA1039910,TRIAE_CS42_2DS_TGACv1_177763_AA0584180,TRIAE_CS42_6DL_TGACv1_527936_AA1710100,TRIAE_CS42_U_TGACv1_643011_AA2126070,TRIAE_CS42_6BS_TGACv1_514507_AA1660710,TRIAE_CS42_5AL_TGACv1_375241_AA1218400,TRIAE_CS42_…
GO:0030120	vesicle coat	cellular_component	1.8996e-08	4.8369e-07	15	2784	79	74606	TRIAE_CS42_1DL_TGACv1_061297_AA0191640,TRIAE_CS42_4AS_TGACv1_306421_AA1007900,TRIAE_CS42_5AL_TGACv1_374774_AA1208800,TRIAE_CS42_7AL_TGACv1_556695_AA1769100,TRIAE_CS42_2DL_TGACv1_158815_AA0526570,TRIAE_CS42_1AL_TGACv1_001331_AA0028860,TRIAE_CS42_4AL_TGACv1_288747_AA0957130,TRIAE_CS42_4DS_TGACv1_362497_AA1180110,TRIAE_CS42_1BL_TGACv1_031076_AA0107250,TRIAE_CS42_4BS_TGACv1_328452_AA1088030,TRIAE_CS4…
GO:0042623	ATPase activity, coupled	molecular_function	2.2775e-08	5.7771e-07	43	2784	574	74606	TRIAE_CS42_3AL_TGACv1_194690_AA0637900,TRIAE_CS42_1DL_TGACv1_062210_AA0210500,TRIAE_CS42_3DS_TGACv1_272407_AA0920320,TRIAE_CS42_7AL_TGACv1_558294_AA1792080,TRIAE_CS42_3AL_TGACv1_193952_AA0623370,TRIAE_CS42_3AL_TGACv1_195562_AA0651220,TRIAE_CS42_7DS_TGACv1_621709_AA2023980,TRIAE_CS42_7DL_TGACv1_603585_AA1986010,TRIAE_CS42_1AL_TGACv1_000051_AA0001340,TRIAE_CS42_5BL_TGACv1_405295_AA1324290,TRIAE_CS4…
GO:0031969	chloroplast membrane	cellular_component	2.3868e-08	6.0316e-07	17	2784	90	74606	TRIAE_CS42_4AS_TGACv1_306406_AA1007690,TRIAE_CS42_5AS_TGACv1_393382_AA1272050,TRIAE_CS42_2DL_TGACv1_160210_AA0548190,TRIAE_CS42_3AL_TGACv1_193741_AA0618880,TRIAE_CS42_4DS_TGACv1_361391_AA1166860,TRIAE_CS42_4BL_TGACv1_321702_AA1064290,TRIAE_CS42_2BS_TGACv1_146815_AA0473320,TRIAE_CS42_4DL_TGACv1_343812_AA1140000,TRIAE_CS42_3AL_TGACv1_197079_AA0664730,TRIAE_CS42_4AL_TGACv1_289623_AA0974220,TRIAE_CS4…
GO:0006886	intracellular protein transport	biological_process	2.6239e-08	6.606e-07	47	2784	551	74606	TRIAE_CS42_4AS_TGACv1_307078_AA1016740,TRIAE_CS42_6DS_TGACv1_542583_AA1724790,TRIAE_CS42_2BL_TGACv1_132610_AA0438600,TRIAE_CS42_3B_TGACv1_223525_AA0783520,TRIAE_CS42_U_TGACv1_641043_AA2083140,TRIAE_CS42_6DS_TGACv1_542697_AA1728230,TRIAE_CS42_5BL_TGACv1_405597_AA1331170,TRIAE_CS42_5AL_TGACv1_378411_AA1253160,TRIAE_CS42_5AL_TGACv1_374122_AA1190950,TRIAE_CS42_3AL_TGACv1_194730_AA0638300,TRIAE_CS42_6…
GO:0044769	ATPase activity, coupled to transmembrane movement of ions, rotational mechanism	molecular_function	2.8105e-08	7.0492e-07	15	2784	59	74606	TRIAE_CS42_3B_TGACv1_221643_AA0746430,TRIAE_CS42_1BL_TGACv1_031692_AA0118950,TRIAE_CS42_7AL_TGACv1_559344_AA1799200,TRIAE_CS42_1AL_TGACv1_004040_AA0052320,TRIAE_CS42_7AL_TGACv1_558294_AA1792080,TRIAE_CS42_3DS_TGACv1_272407_AA0920320,TRIAE_CS42_3AL_TGACv1_194690_AA0637900,TRIAE_CS42_3DL_TGACv1_250717_AA0872310,TRIAE_CS42_1DL_TGACv1_062210_AA0210500,TRIAE_CS42_7BL_TGACv1_579063_AA1903600,TRIAE_CS42…
GO:0009060	aerobic respiration	biological_process	2.9682e-08	7.4171e-07	19	2784	119	74606	TRIAE_CS42_1AL_TGACv1_000087_AA0002830,TRIAE_CS42_4DS_TGACv1_362069_AA1176360,TRIAE_CS42_7BL_TGACv1_578944_AA1902350,TRIAE_CS42_5DL_TGACv1_433363_AA1410880,TRIAE_CS42_7BL_TGACv1_578344_AA1893330,TRIAE_CS42_1AL_TGACv1_002631_AA0043990,TRIAE_CS42_4BS_TGACv1_330348_AA1107290,TRIAE_CS42_1BL_TGACv1_030950_AA0104200,TRIAE_CS42_2DL_TGACv1_159084_AA0532060,TRIAE_CS42_3DL_TGACv1_249199_AA0841000,TRIAE_CS4…
GO:0016746	transferase activity, transferring acyl groups	molecular_function	3.3774e-08	8.4086e-07	89	2784	1344	74606	TRIAE_CS42_7BS_TGACv1_591893_AA1924780,TRIAE_CS42_4BS_TGACv1_328160_AA1083740,TRIAE_CS42_3AS_TGACv1_212208_AA0698820,TRIAE_CS42_7BS_TGACv1_591992_AA1927520,TRIAE_CS42_2DL_TGACv1_162478_AA0562870,TRIAE_CS42_6DL_TGACv1_526391_AA1681850,TRIAE_CS42_U_TGACv1_641317_AA2091700,TRIAE_CS42_5DL_TGACv1_435258_AA1447950,TRIAE_CS42_2AL_TGACv1_095262_AA0308800,TRIAE_CS42_1DS_TGACv1_081598_AA0261790,TRIAE_CS42_…
GO:0033180	proton-transporting V-type ATPase, V1 domain	cellular_component	3.517e-08	8.7238e-07	10	2784	28	74606	TRIAE_CS42_1AL_TGACv1_001462_AA0030900,TRIAE_CS42_3B_TGACv1_221643_AA0746430,TRIAE_CS42_6BS_TGACv1_514088_AA1654890,TRIAE_CS42_7AL_TGACv1_558464_AA1793580,TRIAE_CS42_7BL_TGACv1_579860_AA1910590,TRIAE_CS42_7DL_TGACv1_603800_AA1989460,TRIAE_CS42_7BL_TGACv1_579063_AA1903600,TRIAE_CS42_3AL_TGACv1_195562_AA0651220,TRIAE_CS42_7AL_TGACv1_558294_AA1792080,TRIAE_CS42_3DL_TGACv1_250717_AA0872310
GO:0005774	vacuolar membrane	cellular_component	3.5957e-08	8.8537e-07	30	2784	266	74606	TRIAE_CS42_4AS_TGACv1_306406_AA1007690,TRIAE_CS42_3DS_TGACv1_272832_AA0925630,TRIAE_CS42_2BL_TGACv1_130381_AA0409970,TRIAE_CS42_3DL_TGACv1_250988_AA0875910,TRIAE_CS42_3B_TGACv1_222072_AA0756730,TRIAE_CS42_4AL_TGACv1_291894_AA0996930,TRIAE_CS42_4DS_TGACv1_361383_AA1166600,TRIAE_CS42_3B_TGACv1_225154_AA0805530,TRIAE_CS42_4DL_TGACv1_342471_AA1114460,TRIAE_CS42_4BS_TGACv1_328586_AA1090550,TRIAE_CS42_…
GO:0044437	vacuolar part	cellular_component	3.5957e-08	8.8537e-07	30	2784	266	74606	TRIAE_CS42_1DS_TGACv1_081158_AA0258140,TRIAE_CS42_5AL_TGACv1_375477_AA1222460,TRIAE_CS42_2DL_TGACv1_158421_AA0518370,TRIAE_CS42_2BL_TGACv1_131580_AA0429350,TRIAE_CS42_7DL_TGACv1_603574_AA1985820,TRIAE_CS42_7DL_TGACv1_603800_AA1989460,TRIAE_CS42_2AL_TGACv1_095324_AA0309650,TRIAE_CS42_7AL_TGACv1_558294_AA1792080,TRIAE_CS42_1DL_TGACv1_061704_AA0201970,TRIAE_CS42_3DL_TGACv1_251228_AA0879080,TRIAE_CS4…
GO:0030170	pyridoxal phosphate binding	molecular_function	3.8083e-08	9.3429e-07	31	2784	287	74606	TRIAE_CS42_3DL_TGACv1_249127_AA0838760,TRIAE_CS42_6AS_TGACv1_487104_AA1568170,TRIAE_CS42_3DL_TGACv1_249205_AA0841320,TRIAE_CS42_2DL_TGACv1_159916_AA0544360,TRIAE_CS42_6AL_TGACv1_471819_AA1514670,TRIAE_CS42_3DS_TGACv1_272233_AA0917470,TRIAE_CS42_2AL_TGACv1_093484_AA0280940,TRIAE_CS42_6BS_TGACv1_513449_AA1641870,TRIAE_CS42_2AL_TGACv1_094077_AA0292210,TRIAE_CS42_1AS_TGACv1_019912_AA0072730,TRIAE_CS4…
GO:0009064	glutamine family amino acid metabolic process	biological_process	4.0075e-08	9.7959e-07	20	2784	134	74606	TRIAE_CS42_1AL_TGACv1_000254_AA0007370,TRIAE_CS42_3B_TGACv1_223258_AA0779170,TRIAE_CS42_3DL_TGACv1_249279_AA0843940,TRIAE_CS42_5BL_TGACv1_404165_AA1287780,TRIAE_CS42_U_TGACv1_654540_AA2150720,TRIAE_CS42_4DL_TGACv1_343985_AA1142210,TRIAE_CS42_6BL_TGACv1_500652_AA1608010,TRIAE_CS42_3DS_TGACv1_272233_AA0917470,TRIAE_CS42_4AS_TGACv1_307728_AA1023060,TRIAE_CS42_3AL_TGACv1_193640_AA0616020,TRIAE_CS42_4…
GO:0004177	aminopeptidase activity	molecular_function	4.6482e-08	1.1321e-06	14	2784	67	74606	TRIAE_CS42_4AL_TGACv1_289060_AA0964280,TRIAE_CS42_4DL_TGACv1_342605_AA1117760,TRIAE_CS42_1BL_TGACv1_032431_AA0129810,TRIAE_CS42_1AL_TGACv1_001070_AA0024440,TRIAE_CS42_6DL_TGACv1_528468_AA1714320,TRIAE_CS42_6AS_TGACv1_486130_AA1557260,TRIAE_CS42_4BS_TGACv1_328833_AA1094200,TRIAE_CS42_1AL_TGACv1_000625_AA0016150,TRIAE_CS42_1BL_TGACv1_032099_AA0125390,TRIAE_CS42_1DL_TGACv1_061968_AA0206620,TRIAE_CS4…
GO:0006807	nitrogen compound metabolic process	biological_process	5.4152e-08	1.3141e-06	557	2784	12149	74606	TRIAE_CS42_3AL_TGACv1_197079_AA0664730,TRIAE_CS42_3DL_TGACv1_249219_AA0841860,TRIAE_CS42_2AL_TGACv1_093113_AA0272210,TRIAE_CS42_2BL_TGACv1_129353_AA0379950,TRIAE_CS42_6BL_TGACv1_502708_AA1626110,TRIAE_CS42_5AL_TGACv1_375964_AA1229620,TRIAE_CS42_5DL_TGACv1_433263_AA1407510,TRIAE_CS42_3DL_TGACv1_250081_AA0861860,TRIAE_CS42_1DL_TGACv1_061346_AA0192790,TRIAE_CS42_5DS_TGACv1_456564_AA1474130,TRIAE_CS4…
GO:0051188	cofactor biosynthetic process	biological_process	6.0231e-08	1.4564e-06	35	2784	343	74606	TRIAE_CS42_2AL_TGACv1_094127_AA0292960,TRIAE_CS42_2AL_TGACv1_095862_AA0315240,TRIAE_CS42_2BS_TGACv1_148429_AA0492770,TRIAE_CS42_1BS_TGACv1_050930_AA0176780,TRIAE_CS42_4AS_TGACv1_306569_AA1010320,TRIAE_CS42_2AL_TGACv1_093410_AA0279600,TRIAE_CS42_4BL_TGACv1_322099_AA1068530,TRIAE_CS42_2DL_TGACv1_162716_AA0563420,TRIAE_CS42_5DL_TGACv1_435540_AA1451810,TRIAE_CS42_4AL_TGACv1_289727_AA0976030,TRIAE_CS4…
GO:0006656	phosphatidylcholine biosynthetic process	biological_process	6.6447e-08	1.6007e-06	7	2784	12	74606	TRIAE_CS42_3AL_TGACv1_196405_AA0660080,TRIAE_CS42_1BL_TGACv1_032207_AA0126810,TRIAE_CS42_1DL_TGACv1_063094_AA0223830,TRIAE_CS42_3DL_TGACv1_254806_AA0896680,TRIAE_CS42_3B_TGACv1_221027_AA0727340,TRIAE_CS42_1AL_TGACv1_000734_AA0018090,TRIAE_CS42_1DL_TGACv1_062419_AA0214280
GO:0042170	plastid membrane	cellular_component	6.6676e-08	1.6007e-06	17	2784	97	74606	TRIAE_CS42_4AS_TGACv1_306406_AA1007690,TRIAE_CS42_5AS_TGACv1_393382_AA1272050,TRIAE_CS42_3AL_TGACv1_193741_AA0618880,TRIAE_CS42_2DL_TGACv1_160210_AA0548190,TRIAE_CS42_4DS_TGACv1_361391_AA1166860,TRIAE_CS42_4BL_TGACv1_321702_AA1064290,TRIAE_CS42_2BS_TGACv1_146815_AA0473320,TRIAE_CS42_4DL_TGACv1_343812_AA1140000,TRIAE_CS42_3AL_TGACv1_197079_AA0664730,TRIAE_CS42_4AL_TGACv1_289623_AA0974220,TRIAE_CS4…
GO:0045333	cellular respiration	biological_process	6.9768e-08	1.669e-06	24	2784	174	74606	TRIAE_CS42_1AL_TGACv1_002631_AA0043990,TRIAE_CS42_4BS_TGACv1_330348_AA1107290,TRIAE_CS42_2DL_TGACv1_159084_AA0532060,TRIAE_CS42_1BL_TGACv1_030950_AA0104200,TRIAE_CS42_5BL_TGACv1_407230_AA1354660,TRIAE_CS42_5DL_TGACv1_434321_AA1433910,TRIAE_CS42_3DL_TGACv1_249199_AA0841000,TRIAE_CS42_1AL_TGACv1_000087_AA0002830,TRIAE_CS42_7BL_TGACv1_578944_AA1902350,TRIAE_CS42_4DS_TGACv1_362069_AA1176360,TRIAE_CS4…
GO:0005982	starch metabolic process	biological_process	7.4423e-08	1.774e-06	14	2784	73	74606	TRIAE_CS42_1AL_TGACv1_000384_AA0010710,TRIAE_CS42_1BL_TGACv1_030553_AA0093880,TRIAE_CS42_1BL_TGACv1_031136_AA0108420,TRIAE_CS42_5AL_TGACv1_379463_AA1256450,TRIAE_CS42_4DL_TGACv1_342433_AA1113510,TRIAE_CS42_2BL_TGACv1_131614_AA0429850,TRIAE_CS42_1BL_TGACv1_031712_AA0119450,TRIAE_CS42_5AL_TGACv1_374631_AA1204970,TRIAE_CS42_2BL_TGACv1_130193_AA0406020,TRIAE_CS42_2DL_TGACv1_159587_AA0540290,TRIAE_CS4…
GO:0009706	chloroplast inner membrane	cellular_component	8.9309e-08	2.1213e-06	11	2784	39	74606	TRIAE_CS42_2BS_TGACv1_146815_AA0473320,TRIAE_CS42_3DL_TGACv1_251693_AA0883950,TRIAE_CS42_3AL_TGACv1_197079_AA0664730,TRIAE_CS42_4DS_TGACv1_361391_AA1166860,TRIAE_CS42_3AL_TGACv1_195582_AA0651530,TRIAE_CS42_4BS_TGACv1_329699_AA1103360,TRIAE_CS42_1DL_TGACv1_062818_AA0220440,TRIAE_CS42_2DL_TGACv1_160210_AA0548190,TRIAE_CS42_3AL_TGACv1_193741_AA0618880,TRIAE_CS42_6DL_TGACv1_528046_AA1711090,TRIAE_CS4…
GO:0030060	L-malate dehydrogenase activity	molecular_function	1.2428e-07	2.9415e-06	9	2784	25	74606	TRIAE_CS42_7BL_TGACv1_578344_AA1893330,TRIAE_CS42_7BL_TGACv1_578944_AA1902350,TRIAE_CS42_3B_TGACv1_223879_AA0788930,TRIAE_CS42_1AL_TGACv1_000087_AA0002830,TRIAE_CS42_3DL_TGACv1_249199_AA0841000,TRIAE_CS42_1BL_TGACv1_030950_AA0104200,TRIAE_CS42_1AL_TGACv1_002631_AA0043990,TRIAE_CS42_1BL_TGACv1_031464_AA0114600,TRIAE_CS42_1DL_TGACv1_061661_AA0201230
GO:0072350	tricarboxylic acid metabolic process	biological_process	1.4534e-07	3.428e-06	20	2784	139	74606	TRIAE_CS42_5DL_TGACv1_433363_AA1410880,TRIAE_CS42_7BL_TGACv1_578344_AA1893330,TRIAE_CS42_7BL_TGACv1_578944_AA1902350,TRIAE_CS42_4DS_TGACv1_362069_AA1176360,TRIAE_CS42_1AL_TGACv1_000087_AA0002830,TRIAE_CS42_5DL_TGACv1_434321_AA1433910,TRIAE_CS42_3DL_TGACv1_249199_AA0841000,TRIAE_CS42_5BL_TGACv1_407230_AA1354660,TRIAE_CS42_2DS_TGACv1_178228_AA0593010,TRIAE_CS42_1BL_TGACv1_030950_AA0104200,TRIAE_CS4…
GO:0016903	oxidoreductase activity, acting on the aldehyde or oxo group of donors	molecular_function	1.5247e-07	3.5835e-06	23	2784	181	74606	TRIAE_CS42_1DS_TGACv1_082196_AA0264140,TRIAE_CS42_7DL_TGACv1_605845_AA2008250,TRIAE_CS42_6DL_TGACv1_526670_AA1689480,TRIAE_CS42_5AL_TGACv1_376570_AA1238560,TRIAE_CS42_2AS_TGACv1_112938_AA0348140,TRIAE_CS42_6DS_TGACv1_542766_AA1729850,TRIAE_CS42_6AS_TGACv1_487743_AA1572700,TRIAE_CS42_U_TGACv1_642531_AA2119080,TRIAE_CS42_6BL_TGACv1_502089_AA1623000,TRIAE_CS42_5BL_TGACv1_405004_AA1317680,TRIAE_CS42_…
GO:0008443	phosphofructokinase activity	molecular_function	1.6553e-07	3.877e-06	11	2784	44	74606	TRIAE_CS42_4AL_TGACv1_290300_AA0983760,TRIAE_CS42_4DL_TGACv1_343659_AA1137850,TRIAE_CS42_4BL_TGACv1_320480_AA1040880,TRIAE_CS42_7AS_TGACv1_570937_AA1842720,TRIAE_CS42_7DS_TGACv1_622764_AA2045010,TRIAE_CS42_7AS_TGACv1_571836_AA1850200,TRIAE_CS42_1DL_TGACv1_063603_AA0229020,TRIAE_CS42_4AS_TGACv1_306645_AA1011430,TRIAE_CS42_6AL_TGACv1_471645_AA1512290,TRIAE_CS42_1AL_TGACv1_000755_AA0018450,TRIAE_CS4…
GO:0036442	hydrogen-exporting ATPase activity	molecular_function	1.7829e-07	4.1613e-06	11	2784	46	74606	TRIAE_CS42_3AL_TGACv1_195562_AA0651220,TRIAE_CS42_7BL_TGACv1_579063_AA1903600,TRIAE_CS42_3DS_TGACv1_272407_AA0920320,TRIAE_CS42_3AL_TGACv1_194690_AA0637900,TRIAE_CS42_3DL_TGACv1_250717_AA0872310,TRIAE_CS42_7AL_TGACv1_558294_AA1792080,TRIAE_CS42_7BL_TGACv1_579860_AA1910590,TRIAE_CS42_7DL_TGACv1_603800_AA1989460,TRIAE_CS42_3B_TGACv1_224031_AA0791230,TRIAE_CS42_7AL_TGACv1_559344_AA1799200,TRIAE_CS42…
GO:0008172	S-methyltransferase activity	molecular_function	2.2285e-07	5.1833e-06	7	2784	15	74606	TRIAE_CS42_4DS_TGACv1_361983_AA1175310,TRIAE_CS42_5BS_TGACv1_423584_AA1379990,TRIAE_CS42_4BS_TGACv1_330819_AA1108930,TRIAE_CS42_4DL_TGACv1_343385_AA1133850,TRIAE_CS42_4AL_TGACv1_290117_AA0981910,TRIAE_CS42_5DS_TGACv1_456564_AA1474130,TRIAE_CS42_5AS_TGACv1_393328_AA1271350
GO:0009528	plastid inner membrane	cellular_component	2.3496e-07	5.4462e-06	11	2784	43	74606	TRIAE_CS42_1DL_TGACv1_062818_AA0220440,TRIAE_CS42_3AL_TGACv1_193741_AA0618880,TRIAE_CS42_2DL_TGACv1_160210_AA0548190,TRIAE_CS42_6DL_TGACv1_528046_AA1711090,TRIAE_CS42_4AL_TGACv1_289623_AA0974220,TRIAE_CS42_3DL_TGACv1_251693_AA0883950,TRIAE_CS42_2BS_TGACv1_146815_AA0473320,TRIAE_CS42_3AL_TGACv1_197079_AA0664730,TRIAE_CS42_4DS_TGACv1_361391_AA1166860,TRIAE_CS42_3AL_TGACv1_195582_AA0651530,TRIAE_CS4…
GO:0006066	alcohol metabolic process	biological_process	2.558e-07	5.9088e-06	23	2784	189	74606	TRIAE_CS42_4DL_TGACv1_342557_AA1116570,TRIAE_CS42_3B_TGACv1_221027_AA0727340,TRIAE_CS42_7AL_TGACv1_556888_AA1772870,TRIAE_CS42_7BS_TGACv1_591893_AA1924780,TRIAE_CS42_3B_TGACv1_222617_AA0767980,TRIAE_CS42_1AL_TGACv1_000734_AA0018090,TRIAE_CS42_4AS_TGACv1_307361_AA1019860,TRIAE_CS42_1DL_TGACv1_062419_AA0214280,TRIAE_CS42_1BL_TGACv1_032207_AA0126810,TRIAE_CS42_3AL_TGACv1_194203_AA0628440,TRIAE_CS42_…
GO:0009628	response to abiotic stimulus	biological_process	2.7221e-07	6.2665e-06	71	2784	1039	74606	TRIAE_CS42_5BL_TGACv1_405701_AA1333330,TRIAE_CS42_6AL_TGACv1_471582_AA1511400,TRIAE_CS42_4AS_TGACv1_306406_AA1007690,TRIAE_CS42_7AL_TGACv1_559693_AA1800520,TRIAE_CS42_U_TGACv1_642723_AA2122250,TRIAE_CS42_3B_TGACv1_220956_AA0724960,TRIAE_CS42_2BL_TGACv1_131489_AA0428400,TRIAE_CS42_7DS_TGACv1_621370_AA2013200,TRIAE_CS42_3B_TGACv1_222825_AA0771410,TRIAE_CS42_7AS_TGACv1_570369_AA1834630,TRIAE_CS42_U_…
GO:0046474	glycerophospholipid biosynthetic process	biological_process	2.8738e-07	6.5827e-06	17	2784	113	74606	TRIAE_CS42_3DL_TGACv1_254806_AA0896680,TRIAE_CS42_4AL_TGACv1_288281_AA0943580,TRIAE_CS42_1BL_TGACv1_032207_AA0126810,TRIAE_CS42_2BS_TGACv1_146926_AA0475500,TRIAE_CS42_5DL_TGACv1_433855_AA1423770,TRIAE_CS42_U_TGACv1_643011_AA2126070,TRIAE_CS42_6BS_TGACv1_514507_AA1660710,TRIAE_CS42_6DL_TGACv1_526566_AA1687250,TRIAE_CS42_1DL_TGACv1_063094_AA0223830,TRIAE_CS42_3AL_TGACv1_196405_AA0660080,TRIAE_CS42_…
GO:0034613	cellular protein localization	biological_process	2.8791e-07	6.5827e-06	48	2784	607	74606	TRIAE_CS42_4DL_TGACv1_343137_AA1130350,TRIAE_CS42_6BS_TGACv1_514683_AA1663200,TRIAE_CS42_3AS_TGACv1_211332_AA0688720,TRIAE_CS42_3AL_TGACv1_194730_AA0638300,TRIAE_CS42_5AL_TGACv1_374122_AA1190950,TRIAE_CS42_5AL_TGACv1_378411_AA1253160,TRIAE_CS42_U_TGACv1_641043_AA2083140,TRIAE_CS42_6DS_TGACv1_542697_AA1728230,TRIAE_CS42_3B_TGACv1_223525_AA0783520,TRIAE_CS42_5BL_TGACv1_405597_AA1331170,TRIAE_CS42_6…
GO:0019829	cation-transporting ATPase activity	molecular_function	3.0938e-07	7.0498e-06	19	2784	147	74606	TRIAE_CS42_3AL_TGACv1_195562_AA0651220,TRIAE_CS42_7AL_TGACv1_558294_AA1792080,TRIAE_CS42_3DS_TGACv1_272407_AA0920320,TRIAE_CS42_3AL_TGACv1_194690_AA0637900,TRIAE_CS42_1DL_TGACv1_062210_AA0210500,TRIAE_CS42_1AL_TGACv1_000051_AA0001340,TRIAE_CS42_7DL_TGACv1_603800_AA1989460,TRIAE_CS42_2AL_TGACv1_093051_AA0270470,TRIAE_CS42_2DL_TGACv1_159040_AA0531140,TRIAE_CS42_3B_TGACv1_221643_AA0746430,TRIAE_CS42…
GO:0071702	organic substance transport	biological_process	3.2724e-07	7.4315e-06	97	2784	1537	74606	TRIAE_CS42_2DL_TGACv1_158753_AA0525450,TRIAE_CS42_3B_TGACv1_222044_AA0755670,TRIAE_CS42_5AL_TGACv1_374774_AA1208800,TRIAE_CS42_2BL_TGACv1_129307_AA0377650,TRIAE_CS42_5AL_TGACv1_374196_AA1193370,TRIAE_CS42_5AL_TGACv1_374188_AA1192880,TRIAE_CS42_3DS_TGACv1_271874_AA0909920,TRIAE_CS42_2DL_TGACv1_157989_AA0504930,TRIAE_CS42_4AL_TGACv1_289623_AA0974220,TRIAE_CS42_1AL_TGACv1_001331_AA0028860,TRIAE_CS42…
GO:1901615	organic hydroxy compound metabolic process	biological_process	3.6596e-07	8.2827e-06	28	2784	267	74606	TRIAE_CS42_4DL_TGACv1_342557_AA1116570,TRIAE_CS42_3B_TGACv1_221027_AA0727340,TRIAE_CS42_7AL_TGACv1_556888_AA1772870,TRIAE_CS42_7BS_TGACv1_591893_AA1924780,TRIAE_CS42_4AS_TGACv1_307361_AA1019860,TRIAE_CS42_1AL_TGACv1_000734_AA0018090,TRIAE_CS42_3B_TGACv1_222617_AA0767980,TRIAE_CS42_7AL_TGACv1_559693_AA1800520,TRIAE_CS42_1DL_TGACv1_062419_AA0214280,TRIAE_CS42_3AL_TGACv1_194203_AA0628440,TRIAE_CS42_…
GO:0070727	cellular macromolecule localization	biological_process	3.8016e-07	8.5752e-06	48	2784	613	74606	TRIAE_CS42_3AS_TGACv1_211332_AA0688720,TRIAE_CS42_4DL_TGACv1_343137_AA1130350,TRIAE_CS42_6BS_TGACv1_514683_AA1663200,TRIAE_CS42_3AL_TGACv1_194730_AA0638300,TRIAE_CS42_5AL_TGACv1_374122_AA1190950,TRIAE_CS42_5AL_TGACv1_378411_AA1253160,TRIAE_CS42_5BL_TGACv1_405597_AA1331170,TRIAE_CS42_6DS_TGACv1_542697_AA1728230,TRIAE_CS42_U_TGACv1_641043_AA2083140,TRIAE_CS42_3B_TGACv1_223525_AA0783520,TRIAE_CS42_2…
GO:0042625	ATPase activity, coupled to transmembrane movement of ions	molecular_function	4.3887e-07	9.8665e-06	19	2784	150	74606	TRIAE_CS42_2DL_TGACv1_159040_AA0531140,TRIAE_CS42_2AL_TGACv1_093051_AA0270470,TRIAE_CS42_3B_TGACv1_221643_AA0746430,TRIAE_CS42_3AL_TGACv1_195562_AA0651220,TRIAE_CS42_3AL_TGACv1_194690_AA0637900,TRIAE_CS42_1DL_TGACv1_062210_AA0210500,TRIAE_CS42_3DS_TGACv1_272407_AA0920320,TRIAE_CS42_7AL_TGACv1_558294_AA1792080,TRIAE_CS42_7DL_TGACv1_603800_AA1989460,TRIAE_CS42_1AL_TGACv1_000051_AA0001340,TRIAE_CS42…
GO:0015031	protein transport	biological_process	5.3742e-07	1.2042e-05	59	2784	819	74606	TRIAE_CS42_2DL_TGACv1_157989_AA0504930,TRIAE_CS42_7AS_TGACv1_571321_AA1846800,TRIAE_CS42_U_TGACv1_643044_AA2126510,TRIAE_CS42_5DL_TGACv1_433822_AA1423010,TRIAE_CS42_1AL_TGACv1_001331_AA0028860,TRIAE_CS42_5AL_TGACv1_374774_AA1208800,TRIAE_CS42_U_TGACv1_642388_AA2116800,TRIAE_CS42_2BL_TGACv1_129307_AA0377650,TRIAE_CS42_3B_TGACv1_221205_AA0733750,TRIAE_CS42_6BS_TGACv1_514140_AA1655890,TRIAE_CS42_U_T…
GO:0031968	organelle outer membrane	cellular_component	5.9968e-07	1.3392e-05	17	2784	99	74606	TRIAE_CS42_3DL_TGACv1_252453_AA0890080,TRIAE_CS42_4BL_TGACv1_321242_AA1057770,TRIAE_CS42_3B_TGACv1_222044_AA0755670,TRIAE_CS42_U_TGACv1_643044_AA2126510,TRIAE_CS42_3B_TGACv1_223093_AA0776380,TRIAE_CS42_4DL_TGACv1_345350_AA1152790,TRIAE_CS42_6DL_TGACv1_528046_AA1711090,TRIAE_CS42_5AL_TGACv1_376343_AA1235470,TRIAE_CS42_4AS_TGACv1_306930_AA1015160,TRIAE_CS42_4DL_TGACv1_343137_AA1130350,TRIAE_CS42_3B…
GO:0044264	cellular polysaccharide metabolic process	biological_process	6.2128e-07	1.3829e-05	39	2784	482	74606	TRIAE_CS42_4DS_TGACv1_361657_AA1171120,TRIAE_CS42_5DL_TGACv1_435303_AA1448600,TRIAE_CS42_4BS_TGACv1_329631_AA1102810,TRIAE_CS42_2AS_TGACv1_116387_AA0373890,TRIAE_CS42_1AL_TGACv1_000384_AA0010710,TRIAE_CS42_2AS_TGACv1_113522_AA0357250,TRIAE_CS42_2AS_TGACv1_112747_AA0344470,TRIAE_CS42_2DL_TGACv1_158951_AA0529400,TRIAE_CS42_2DS_TGACv1_177436_AA0577070,TRIAE_CS42_1DL_TGACv1_062182_AA0210070,TRIAE_CS4…
GO:1901677	phosphate transmembrane transporter activity	molecular_function	6.4325e-07	1.427e-05	15	2784	89	74606	TRIAE_CS42_5DL_TGACv1_434482_AA1436750,TRIAE_CS42_4AL_TGACv1_289623_AA0974220,TRIAE_CS42_3B_TGACv1_223199_AA0777850,TRIAE_CS42_5BL_TGACv1_405907_AA1337450,TRIAE_CS42_3AS_TGACv1_210574_AA0675360,TRIAE_CS42_5DL_TGACv1_432946_AA1395680,TRIAE_CS42_5AL_TGACv1_374188_AA1192880,TRIAE_CS42_2BL_TGACv1_129391_AA0381430,TRIAE_CS42_6AL_TGACv1_470942_AA1499130,TRIAE_CS42_4BS_TGACv1_329699_AA1103360,TRIAE_CS42…
GO:0006073	cellular glucan metabolic process	biological_process	6.5759e-07	1.4493e-05	36	2784	431	74606	TRIAE_CS42_2BS_TGACv1_148740_AA0494910,TRIAE_CS42_1BL_TGACv1_031136_AA0108420,TRIAE_CS42_7AL_TGACv1_556597_AA1766600,TRIAE_CS42_7BL_TGACv1_576920_AA1859780,TRIAE_CS42_5BL_TGACv1_404684_AA1308350,TRIAE_CS42_2AL_TGACv1_093163_AA0273760,TRIAE_CS42_2BS_TGACv1_147826_AA0487990,TRIAE_CS42_2DL_TGACv1_159587_AA0540290,TRIAE_CS42_2BL_TGACv1_131489_AA0428400,TRIAE_CS42_5AL_TGACv1_375073_AA1215420,TRIAE_CS4…
GO:0044042	glucan metabolic process	biological_process	6.5759e-07	1.4493e-05	36	2784	431	74606	TRIAE_CS42_2BL_TGACv1_131489_AA0428400,TRIAE_CS42_2DL_TGACv1_159587_AA0540290,TRIAE_CS42_2AL_TGACv1_093163_AA0273760,TRIAE_CS42_2BS_TGACv1_147826_AA0487990,TRIAE_CS42_5BL_TGACv1_404684_AA1308350,TRIAE_CS42_7BL_TGACv1_576920_AA1859780,TRIAE_CS42_7AL_TGACv1_556597_AA1766600,TRIAE_CS42_1BL_TGACv1_031136_AA0108420,TRIAE_CS42_2BS_TGACv1_148740_AA0494910,TRIAE_CS42_2DS_TGACv1_177249_AA0570440,TRIAE_CS4…
GO:0045184	establishment of protein localization	biological_process	8.0623e-07	1.7711e-05	60	2784	849	74606	TRIAE_CS42_5BL_TGACv1_405597_AA1331170,TRIAE_CS42_3B_TGACv1_223525_AA0783520,TRIAE_CS42_6DS_TGACv1_542697_AA1728230,TRIAE_CS42_U_TGACv1_641043_AA2083140,TRIAE_CS42_1BL_TGACv1_030295_AA0085760,TRIAE_CS42_5DS_TGACv1_458693_AA1494370,TRIAE_CS42_2BL_TGACv1_132610_AA0438600,TRIAE_CS42_4AS_TGACv1_307078_AA1016740,TRIAE_CS42_6DS_TGACv1_542583_AA1724790,TRIAE_CS42_6AL_TGACv1_471165_AA1503930,TRIAE_CS42_3…
GO:0032051	clathrin light chain binding	molecular_function	9.2648e-07	2.022e-05	4	2784	5	74606	TRIAE_CS42_4BS_TGACv1_328452_AA1088030,TRIAE_CS42_5AL_TGACv1_378411_AA1253160,TRIAE_CS42_4DS_TGACv1_362497_AA1180110,TRIAE_CS42_4AL_TGACv1_288747_AA0957130
GO:0071439	clathrin complex	cellular_component	9.2648e-07	2.022e-05	4	2784	5	74606	TRIAE_CS42_5AL_TGACv1_378411_AA1253160,TRIAE_CS42_4DS_TGACv1_362497_AA1180110,TRIAE_CS42_4BS_TGACv1_328452_AA1088030,TRIAE_CS42_4AL_TGACv1_288747_AA0957130
GO:0005829	cytosol	cellular_component	9.3724e-07	2.0389e-05	56	2784	773	74606	TRIAE_CS42_3B_TGACv1_224285_AA0794840,TRIAE_CS42_2AL_TGACv1_095324_AA0309650,TRIAE_CS42_5AS_TGACv1_393357_AA1271740,TRIAE_CS42_3DS_TGACv1_272144_AA0915590,TRIAE_CS42_6DL_TGACv1_528145_AA1711960,TRIAE_CS42_5DL_TGACv1_434775_AA1441440,TRIAE_CS42_3AS_TGACv1_210940_AA0681740,TRIAE_CS42_6AS_TGACv1_487471_AA1570800,TRIAE_CS42_3DL_TGACv1_252076_AA0887540,TRIAE_CS42_5DL_TGACv1_434221_AA1432010,TRIAE_CS42…
GO:0004742	dihydrolipoyllysine-residue acetyltransferase activity	molecular_function	9.8888e-07	2.1237e-05	5	2784	7	74606	TRIAE_CS42_6DS_TGACv1_544326_AA1747750,TRIAE_CS42_6BS_TGACv1_514091_AA1654910,TRIAE_CS42_6AS_TGACv1_486115_AA1557000,TRIAE_CS42_7DS_TGACv1_622603_AA2042460,TRIAE_CS42_4AL_TGACv1_292578_AA0999200
GO:0016418	S-acetyltransferase activity	molecular_function	9.8888e-07	2.1237e-05	5	2784	7	74606	TRIAE_CS42_6DS_TGACv1_544326_AA1747750,TRIAE_CS42_6BS_TGACv1_514091_AA1654910,TRIAE_CS42_6AS_TGACv1_486115_AA1557000,TRIAE_CS42_7DS_TGACv1_622603_AA2042460,TRIAE_CS42_4AL_TGACv1_292578_AA0999200
GO:0030523	dihydrolipoamide S-acyltransferase activity	molecular_function	9.8888e-07	2.1237e-05	5	2784	7	74606	TRIAE_CS42_7DS_TGACv1_622603_AA2042460,TRIAE_CS42_4AL_TGACv1_292578_AA0999200,TRIAE_CS42_6DS_TGACv1_544326_AA1747750,TRIAE_CS42_6BS_TGACv1_514091_AA1654910,TRIAE_CS42_6AS_TGACv1_486115_AA1557000
GO:0045254	pyruvate dehydrogenase complex	cellular_component	9.8888e-07	2.1237e-05	5	2784	7	74606	TRIAE_CS42_6DS_TGACv1_544326_AA1747750,TRIAE_CS42_6AS_TGACv1_486115_AA1557000,TRIAE_CS42_6BS_TGACv1_514091_AA1654910,TRIAE_CS42_7DS_TGACv1_622603_AA2042460,TRIAE_CS42_4AL_TGACv1_292578_AA0999200
GO:0009084	glutamine family amino acid biosynthetic process	biological_process	1.0887e-06	2.3307e-05	12	2784	62	74606	TRIAE_CS42_6BL_TGACv1_500652_AA1608010,TRIAE_CS42_U_TGACv1_654540_AA2150720,TRIAE_CS42_6DL_TGACv1_527226_AA1700820,TRIAE_CS42_2DS_TGACv1_177239_AA0570170,TRIAE_CS42_4AS_TGACv1_307728_AA1023060,TRIAE_CS42_1AL_TGACv1_000254_AA0007380,TRIAE_CS42_3B_TGACv1_220588_AA0709800,TRIAE_CS42_3B_TGACv1_225182_AA0805900,TRIAE_CS42_1AL_TGACv1_000254_AA0007370,TRIAE_CS42_3AL_TGACv1_193640_AA0616020,TRIAE_CS42_5D…
GO:0000139	Golgi membrane	cellular_component	1.2428e-06	2.6521e-05	28	2784	298	74606	TRIAE_CS42_U_TGACv1_641043_AA2083140,TRIAE_CS42_6DS_TGACv1_542583_AA1724790,TRIAE_CS42_6AS_TGACv1_486272_AA1559050,TRIAE_CS42_5DS_TGACv1_458693_AA1494370,TRIAE_CS42_6BS_TGACv1_514683_AA1663200,TRIAE_CS42_5AL_TGACv1_378411_AA1253160,TRIAE_CS42_1BL_TGACv1_031047_AA0106660,TRIAE_CS42_4BL_TGACv1_320261_AA1032800,TRIAE_CS42_1BL_TGACv1_031076_AA0107250,TRIAE_CS42_4BS_TGACv1_328452_AA1088030,TRIAE_CS42_…
GO:0044445	cytosolic part	cellular_component	1.3043e-06	2.7746e-05	14	2784	72	74606	TRIAE_CS42_5AS_TGACv1_393357_AA1271740,TRIAE_CS42_2AL_TGACv1_095324_AA0309650,TRIAE_CS42_5BL_TGACv1_405701_AA1333330,TRIAE_CS42_2DL_TGACv1_158421_AA0518370,TRIAE_CS42_5BS_TGACv1_423965_AA1385430,TRIAE_CS42_5BS_TGACv1_423649_AA1381290,TRIAE_CS42_2BL_TGACv1_130381_AA0409970,TRIAE_CS42_5AS_TGACv1_394202_AA1278730,TRIAE_CS42_4DL_TGACv1_345164_AA1151970,TRIAE_CS42_2BS_TGACv1_146248_AA0460190,TRIAE_CS4…
GO:0003979	UDP-glucose 6-dehydrogenase activity	molecular_function	1.394e-06	2.9561e-05	6	2784	12	74606	TRIAE_CS42_5BL_TGACv1_404418_AA1299220,TRIAE_CS42_5AL_TGACv1_375282_AA1219100,TRIAE_CS42_4DS_TGACv1_361591_AA1170510,TRIAE_CS42_5DL_TGACv1_433028_AA1398770,TRIAE_CS42_4BS_TGACv1_329796_AA1104090,TRIAE_CS42_4AL_TGACv1_288429_AA0948580
GO:0016776	phosphotransferase activity, phosphate group as acceptor	molecular_function	1.4151e-06	2.9913e-05	14	2784	78	74606	TRIAE_CS42_4AL_TGACv1_288750_AA0957210,TRIAE_CS42_4BL_TGACv1_320339_AA1035830,TRIAE_CS42_5BS_TGACv1_424804_AA1391850,TRIAE_CS42_5DS_TGACv1_456506_AA1472400,TRIAE_CS42_6BL_TGACv1_499743_AA1590800,TRIAE_CS42_U_TGACv1_642445_AA2117740,TRIAE_CS42_4DL_TGACv1_343142_AA1130440,TRIAE_CS42_1AL_TGACv1_000492_AA0013410,TRIAE_CS42_7BL_TGACv1_579222_AA1905450,TRIAE_CS42_4DS_TGACv1_361106_AA1161070,TRIAE_CS42_…
GO:0016024	CDP-diacylglycerol biosynthetic process	biological_process	1.449e-06	3.0438e-05	6	2784	12	74606	TRIAE_CS42_1AL_TGACv1_003920_AA0051930,TRIAE_CS42_6AS_TGACv1_485300_AA1542750,TRIAE_CS42_1BL_TGACv1_030666_AA0097340,TRIAE_CS42_1DL_TGACv1_063673_AA0229730,TRIAE_CS42_6BS_TGACv1_514507_AA1660710,TRIAE_CS42_U_TGACv1_643011_AA2126070
GO:0046341	CDP-diacylglycerol metabolic process	biological_process	1.449e-06	3.0438e-05	6	2784	12	74606	TRIAE_CS42_1DL_TGACv1_063673_AA0229730,TRIAE_CS42_1AL_TGACv1_003920_AA0051930,TRIAE_CS42_1BL_TGACv1_030666_AA0097340,TRIAE_CS42_6AS_TGACv1_485300_AA1542750,TRIAE_CS42_U_TGACv1_643011_AA2126070,TRIAE_CS42_6BS_TGACv1_514507_AA1660710
GO:0046835	carbohydrate phosphorylation	biological_process	1.6095e-06	3.3705e-05	12	2784	66	74606	TRIAE_CS42_7AS_TGACv1_571836_AA1850200,TRIAE_CS42_7DS_TGACv1_622764_AA2045010,TRIAE_CS42_4AS_TGACv1_306645_AA1011430,TRIAE_CS42_4DL_TGACv1_343659_AA1137850,TRIAE_CS42_4BL_TGACv1_320480_AA1040880,TRIAE_CS42_2AL_TGACv1_093541_AA0282230,TRIAE_CS42_7AS_TGACv1_570937_AA1842720,TRIAE_CS42_7BS_TGACv1_592259_AA1934400,TRIAE_CS42_7BS_TGACv1_592594_AA1941060,TRIAE_CS42_6AL_TGACv1_471645_AA1512290,TRIAE_CS4…
GO:0033176	proton-transporting V-type ATPase complex	cellular_component	1.7729e-06	3.7012e-05	12	2784	57	74606	TRIAE_CS42_7AL_TGACv1_558464_AA1793580,TRIAE_CS42_U_TGACv1_642696_AA2121820,TRIAE_CS42_3B_TGACv1_221643_AA0746430,TRIAE_CS42_6BS_TGACv1_514088_AA1654890,TRIAE_CS42_5DL_TGACv1_436184_AA1459030,TRIAE_CS42_1AL_TGACv1_001462_AA0030900,TRIAE_CS42_7DL_TGACv1_603800_AA1989460,TRIAE_CS42_7BL_TGACv1_579860_AA1910590,TRIAE_CS42_3DL_TGACv1_250717_AA0872310,TRIAE_CS42_7AL_TGACv1_558294_AA1792080,TRIAE_CS42_7…
GO:0005741	mitochondrial outer membrane	cellular_component	1.79e-06	3.7251e-05	13	2784	60	74606	TRIAE_CS42_4BL_TGACv1_321242_AA1057770,TRIAE_CS42_3DL_TGACv1_252453_AA0890080,TRIAE_CS42_4DL_TGACv1_343137_AA1130350,TRIAE_CS42_3B_TGACv1_222757_AA0770040,TRIAE_CS42_3AL_TGACv1_194730_AA0638300,TRIAE_CS42_5AL_TGACv1_378731_AA1254390,TRIAE_CS42_U_TGACv1_643044_AA2126510,TRIAE_CS42_3B_TGACv1_223093_AA0776380,TRIAE_CS42_4BL_TGACv1_321851_AA1066240,TRIAE_CS42_4DL_TGACv1_345350_AA1152790,TRIAE_CS42_3B…
GO:0008104	protein localization	biological_process	2.2194e-06	4.6046e-05	60	2784	871	74606	TRIAE_CS42_3AL_TGACv1_194730_AA0638300,TRIAE_CS42_5AL_TGACv1_374122_AA1190950,TRIAE_CS42_5AL_TGACv1_378411_AA1253160,TRIAE_CS42_5AL_TGACv1_375095_AA1216020,TRIAE_CS42_4DL_TGACv1_343137_AA1130350,TRIAE_CS42_6BS_TGACv1_514683_AA1663200,TRIAE_CS42_3AS_TGACv1_211332_AA0688720,TRIAE_CS42_6AL_TGACv1_471165_AA1503930,TRIAE_CS42_6DS_TGACv1_542583_AA1724790,TRIAE_CS42_4AS_TGACv1_307078_AA1016740,TRIAE_CS4…
GO:0006555	methionine metabolic process	biological_process	2.3936e-06	4.9508e-05	10	2784	43	74606	TRIAE_CS42_4AL_TGACv1_290117_AA0981910,TRIAE_CS42_4BS_TGACv1_330819_AA1108930,TRIAE_CS42_5BL_TGACv1_406345_AA1344380,TRIAE_CS42_7DS_TGACv1_624143_AA2059180,TRIAE_CS42_5AL_TGACv1_374680_AA1206310,TRIAE_CS42_5AS_TGACv1_393328_AA1271350,TRIAE_CS42_5DS_TGACv1_456564_AA1474130,TRIAE_CS42_5BS_TGACv1_423584_AA1379990,TRIAE_CS42_4DS_TGACv1_361983_AA1175310,TRIAE_CS42_4DL_TGACv1_343385_AA1133850
GO:0034637	cellular carbohydrate biosynthetic process	biological_process	2.6684e-06	5.5021e-05	28	2784	333	74606	TRIAE_CS42_2AS_TGACv1_113522_AA0357250,TRIAE_CS42_1BL_TGACv1_030553_AA0093880,TRIAE_CS42_1AL_TGACv1_000384_AA0010710,TRIAE_CS42_4BL_TGACv1_320456_AA1039910,TRIAE_CS42_2AL_TGACv1_093044_AA0270150,TRIAE_CS42_2DL_TGACv1_158951_AA0529400,TRIAE_CS42_2BL_TGACv1_131614_AA0429850,TRIAE_CS42_1DL_TGACv1_061317_AA0192320,TRIAE_CS42_5DL_TGACv1_433855_AA1423770,TRIAE_CS42_4AL_TGACv1_288528_AA0951160,TRIAE_CS4…
GO:0030132	clathrin coat of coated pit	cellular_component	2.7604e-06	5.6745e-05	6	2784	14	74606	TRIAE_CS42_5AL_TGACv1_378411_AA1253160,TRIAE_CS42_4DS_TGACv1_362497_AA1180110,TRIAE_CS42_4BS_TGACv1_328452_AA1088030,TRIAE_CS42_7AL_TGACv1_556695_AA1769100,TRIAE_CS42_7DL_TGACv1_602635_AA1963430,TRIAE_CS42_4AL_TGACv1_288747_AA0957130
GO:1902600	hydrogen ion transmembrane transport	biological_process	2.8239e-06	5.7873e-05	28	2784	273	74606	TRIAE_CS42_1AL_TGACv1_004040_AA0052320,TRIAE_CS42_5DL_TGACv1_436184_AA1459030,TRIAE_CS42_7AL_TGACv1_559344_AA1799200,TRIAE_CS42_1BL_TGACv1_031692_AA0118950,TRIAE_CS42_7BL_TGACv1_579860_AA1910590,TRIAE_CS42_3B_TGACv1_224031_AA0791230,TRIAE_CS42_2BL_TGACv1_130381_AA0409970,TRIAE_CS42_7BL_TGACv1_579063_AA1903600,TRIAE_CS42_3DL_TGACv1_250717_AA0872310,TRIAE_CS42_1AL_TGACv1_001462_AA0030900,TRIAE_CS42…
GO:0071704	organic substance metabolic process	biological_process	2.9467e-06	6.0205e-05	1061	2784	26241	74606	TRIAE_CS42_2DS_TGACv1_179544_AA0607840,AIG90477,TRIAE_CS42_2BL_TGACv1_133208_AA0441860,TRIAE_CS42_3AL_TGACv1_193640_AA0616020,TRIAE_CS42_7BS_TGACv1_592026_AA1928570,TRIAE_CS42_6AL_TGACv1_472261_AA1520090,TRIAE_CS42_7AL_TGACv1_557846_AA1786980,TRIAE_CS42_6DL_TGACv1_526364_AA1680800,TRIAE_CS42_5AS_TGACv1_392521_AA1259850,TRIAE_CS42_3DS_TGACv1_272429_AA0920630,TRIAE_CS42_7AL_TGACv1_558818_AA1796260,…
289200_AA0967200,TRIAE_CS42_7AS_TGACv1_569064_AA1806120,TRIAE_CS42_1BL_TGACv1_031783_AA0120520,TRIAE_CS42_2AL_TGACv1_094121_AA0292800,TRIAE_CS42_1DS_TGACv1_080286_AA0245260,TRIAE_CS42_3AS_TGACv1_210457_AA0672630,TRIAE_CS42_3DL_TGACv1_251082_AA0877230,TRIAE_CS42_5AL_TGACv1_376140_AA1232710,TRIAE_CS42_1DL_TGACv1_061125_AA0186210,TRIAE_CS42_1AL_TGACv1_000695_AA0017180,TRIAE_CS42_1AL_TGACv1_002304_AA…
GO:0003896	DNA primase activity	molecular_function	3.038e-06	6.1695e-05	5	2784	9	74606	TRIAE_CS42_1DL_TGACv1_061894_AA0205340,TRIAE_CS42_2DL_TGACv1_161360_AA0558180,TRIAE_CS42_2BL_TGACv1_129976_AA0400820,TRIAE_CS42_2AL_TGACv1_094809_AA0303420,TRIAE_CS42_1BL_TGACv1_031783_AA0120520
GO:0006269	DNA replication, synthesis of RNA primer	biological_process	3.038e-06	6.1695e-05	5	2784	9	74606	TRIAE_CS42_1DL_TGACv1_061894_AA0205340,TRIAE_CS42_1BL_TGACv1_031783_AA0120520,TRIAE_CS42_2BL_TGACv1_129976_AA0400820,TRIAE_CS42_2AL_TGACv1_094809_AA0303420,TRIAE_CS42_2DL_TGACv1_161360_AA0558180
GO:0016051	carbohydrate biosynthetic process	biological_process	3.1608e-06	6.3996e-05	34	2784	439	74606	TRIAE_CS42_2BS_TGACv1_147826_AA0487990,TRIAE_CS42_2AL_TGACv1_093163_AA0273760,TRIAE_CS42_2BL_TGACv1_131489_AA0428400,TRIAE_CS42_2DL_TGACv1_159587_AA0540290,TRIAE_CS42_1DS_TGACv1_081340_AA0260080,TRIAE_CS42_7AL_TGACv1_556597_AA1766600,TRIAE_CS42_4DL_TGACv1_342557_AA1116570,TRIAE_CS42_1BL_TGACv1_031136_AA0108420,TRIAE_CS42_6BS_TGACv1_513935_AA1652480,TRIAE_CS42_2AL_TGACv1_093044_AA0270150,TRIAE_CS4…
GO:0004478	methionine adenosyltransferase activity	molecular_function	3.2158e-06	6.4721e-05	6	2784	13	74606	TRIAE_CS42_6BL_TGACv1_500297_AA1602810,TRIAE_CS42_3AS_TGACv1_213440_AA0706960,TRIAE_CS42_6BL_TGACv1_499577_AA1586520,TRIAE_CS42_6AL_TGACv1_475648_AA1536640,TRIAE_CS42_3B_TGACv1_223441_AA0782230,TRIAE_CS42_6DL_TGACv1_526382_AA1681340
GO:0006556	S-adenosylmethionine biosynthetic process	biological_process	3.2158e-06	6.4721e-05	6	2784	13	74606	TRIAE_CS42_6BL_TGACv1_500297_AA1602810,TRIAE_CS42_3AS_TGACv1_213440_AA0706960,TRIAE_CS42_6BL_TGACv1_499577_AA1586520,TRIAE_CS42_6AL_TGACv1_475648_AA1536640,TRIAE_CS42_3B_TGACv1_223441_AA0782230,TRIAE_CS42_6DL_TGACv1_526382_AA1681340
GO:0016620	oxidoreductase activity, acting on the aldehyde or oxo group of donors, NAD or NADP as acceptor	molecular_function	3.4275e-06	6.8776e-05	19	2784	156	74606	TRIAE_CS42_6DL_TGACv1_526670_AA1689480,TRIAE_CS42_7DL_TGACv1_605845_AA2008250,TRIAE_CS42_1DS_TGACv1_082196_AA0264140,TRIAE_CS42_U_TGACv1_642531_AA2119080,TRIAE_CS42_6DS_TGACv1_542766_AA1729850,TRIAE_CS42_6AS_TGACv1_487743_AA1572700,TRIAE_CS42_6BL_TGACv1_502089_AA1623000,TRIAE_CS42_5BL_TGACv1_405004_AA1317680,TRIAE_CS42_1AL_TGACv1_000254_AA0007370,TRIAE_CS42_U_TGACv1_645225_AA2143600,TRIAE_CS42_1B…
GO:0035999	tetrahydrofolate interconversion	biological_process	3.6306e-06	7.2634e-05	6	2784	14	74606	TRIAE_CS42_2DL_TGACv1_159916_AA0544360,TRIAE_CS42_5BL_TGACv1_406345_AA1344380,TRIAE_CS42_5AL_TGACv1_374680_AA1206310,TRIAE_CS42_4DS_TGACv1_362836_AA1182360,TRIAE_CS42_2AL_TGACv1_094077_AA0292210,TRIAE_CS42_2BL_TGACv1_129567_AA0388870
GO:0019205	nucleobase-containing compound kinase activity	molecular_function	3.8428e-06	7.6651e-05	14	2784	83	74606	TRIAE_CS42_5DS_TGACv1_456506_AA1472400,TRIAE_CS42_4BL_TGACv1_320339_AA1035830,TRIAE_CS42_5BS_TGACv1_424804_AA1391850,TRIAE_CS42_6BL_TGACv1_499360_AA1579440,TRIAE_CS42_6DL_TGACv1_526952_AA1695860,TRIAE_CS42_U_TGACv1_642445_AA2117740,TRIAE_CS42_7BL_TGACv1_579222_AA1905450,TRIAE_CS42_1AL_TGACv1_000492_AA0013410,TRIAE_CS42_4DL_TGACv1_343142_AA1130440,TRIAE_CS42_6AL_TGACv1_473321_AA1530120,TRIAE_CS42_…
GO:0008092	cytoskeletal protein binding	molecular_function	4.6122e-06	9.0857e-05	36	2784	507	74606	TRIAE_CS42_7BS_TGACv1_592358_AA1936370,TRIAE_CS42_6AL_TGACv1_471163_AA1503860,TRIAE_CS42_5BL_TGACv1_405531_AA1329570,TRIAE_CS42_5AL_TGACv1_374243_AA1194880,TRIAE_CS42_7BS_TGACv1_592050_AA1929210,TRIAE_CS42_2DL_TGACv1_158390_AA0517350,TRIAE_CS42_4AS_TGACv1_307317_AA1019370,TRIAE_CS42_5DS_TGACv1_456910_AA1479880,TRIAE_CS42_3DS_TGACv1_271667_AA0905120,TRIAE_CS42_2BS_TGACv1_147476_AA0483590,TRIAE_CS4…
GO:0016868	intramolecular transferase activity, phosphotransferases	molecular_function	4.6165e-06	9.0857e-05	9	2784	37	74606	TRIAE_CS42_5DS_TGACv1_456816_AA1478510,TRIAE_CS42_5AS_TGACv1_393825_AA1276270,TRIAE_CS42_3AL_TGACv1_196039_AA0656760,TRIAE_CS42_3DL_TGACv1_251020_AA0876220,TRIAE_CS42_4AL_TGACv1_288277_AA0943460,TRIAE_CS42_5AS_TGACv1_395024_AA1282460,TRIAE_CS42_2AL_TGACv1_093532_AA0281910,TRIAE_CS42_5BS_TGACv1_423595_AA1380330,TRIAE_CS42_3B_TGACv1_222141_AA0758150
GO:0030894	replisome	cellular_component	4.6226e-06	9.0857e-05	5	2784	8	74606	TRIAE_CS42_4AS_TGACv1_306214_AA1004350,TRIAE_CS42_1DL_TGACv1_061346_AA0192790,TRIAE_CS42_3B_TGACv1_221965_AA0753990,TRIAE_CS42_4BL_TGACv1_321871_AA1066490,TRIAE_CS42_4DL_TGACv1_342972_AA1126540
GO:0043596	nuclear replication fork	cellular_component	4.6226e-06	9.0857e-05	5	2784	8	74606	TRIAE_CS42_4DL_TGACv1_342972_AA1126540,TRIAE_CS42_4AS_TGACv1_306214_AA1004350,TRIAE_CS42_1DL_TGACv1_061346_AA0192790,TRIAE_CS42_3B_TGACv1_221965_AA0753990,TRIAE_CS42_4BL_TGACv1_321871_AA1066490
GO:0043601	nuclear replisome	cellular_component	4.6226e-06	9.0857e-05	5	2784	8	74606	TRIAE_CS42_4BL_TGACv1_321871_AA1066490,TRIAE_CS42_3B_TGACv1_221965_AA0753990,TRIAE_CS42_1DL_TGACv1_061346_AA0192790,TRIAE_CS42_4AS_TGACv1_306214_AA1004350,TRIAE_CS42_4DL_TGACv1_342972_AA1126540
GO:0048193	Golgi vesicle transport	biological_process	4.6526e-06	9.1181e-05	17	2784	132	74606	TRIAE_CS42_2DL_TGACv1_158815_AA0526570,TRIAE_CS42_2BS_TGACv1_146389_AA0464090,TRIAE_CS42_5DS_TGACv1_458693_AA1494370,TRIAE_CS42_5BL_TGACv1_407080_AA1353120,TRIAE_CS42_4BL_TGACv1_320261_AA1032800,TRIAE_CS42_2BL_TGACv1_129610_AA0390450,TRIAE_CS42_5AL_TGACv1_374451_AA1200460,TRIAE_CS42_2BS_TGACv1_146165_AA0457230,TRIAE_CS42_2AS_TGACv1_113808_AA0360930,TRIAE_CS42_7AS_TGACv1_570466_AA1836110,TRIAE_CS4…
GO:0005905	coated pit	cellular_component	5.5197e-06	0.00010786	6	2784	16	74606	TRIAE_CS42_4AL_TGACv1_288747_AA0957130,TRIAE_CS42_7DL_TGACv1_602635_AA1963430,TRIAE_CS42_4DS_TGACv1_362497_AA1180110,TRIAE_CS42_5AL_TGACv1_378411_AA1253160,TRIAE_CS42_4BS_TGACv1_328452_AA1088030,TRIAE_CS42_7AL_TGACv1_556695_AA1769100
GO:0043101	purine-containing compound salvage	biological_process	5.884e-06	0.00011464	7	2784	20	74606	TRIAE_CS42_6BL_TGACv1_499716_AA1589820,TRIAE_CS42_6AL_TGACv1_472192_AA1519000,TRIAE_CS42_6DL_TGACv1_528171_AA1712170,TRIAE_CS42_6BL_TGACv1_499360_AA1579440,TRIAE_CS42_6DL_TGACv1_526952_AA1695860,TRIAE_CS42_6AL_TGACv1_473321_AA1530120,TRIAE_CS42_1AS_TGACv1_019145_AA0061580
GO:0005852	eukaryotic translation initiation factor 3 complex	cellular_component	5.9869e-06	0.00011631	11	2784	60	74606	TRIAE_CS42_5AL_TGACv1_374249_AA1195140,TRIAE_CS42_4DS_TGACv1_362664_AA1181310,TRIAE_CS42_5AL_TGACv1_377520_AA1247660,TRIAE_CS42_3B_TGACv1_223624_AA0784810,TRIAE_CS42_5DL_TGACv1_435150_AA1446750,TRIAE_CS42_U_TGACv1_642463_AA2118090,TRIAE_CS42_4AL_TGACv1_289336_AA0969290,TRIAE_CS42_5BL_TGACv1_404980_AA1317000,TRIAE_CS42_5BL_TGACv1_405701_AA1333330,TRIAE_CS42_4BL_TGACv1_320636_AA1045250,TRIAE_CS42_6…
GO:0000287	magnesium ion binding	molecular_function	6.1135e-06	0.00011843	33	2784	402	74606	TRIAE_CS42_1DL_TGACv1_062999_AA0222790,TRIAE_CS42_1BL_TGACv1_030605_AA0095500,TRIAE_CS42_4BS_TGACv1_330279_AA1106910,TRIAE_CS42_5BS_TGACv1_423965_AA1385430,TRIAE_CS42_1DL_TGACv1_063752_AA0230580,TRIAE_CS42_2AS_TGACv1_112739_AA0344340,TRIAE_CS42_3B_TGACv1_226655_AA0818420,TRIAE_CS42_2BL_TGACv1_129772_AA0395390,TRIAE_CS42_5AS_TGACv1_393357_AA1271740,TRIAE_CS42_4DS_TGACv1_362522_AA1180350,TRIAE_CS42…
GO:0046173	polyol biosynthetic process	biological_process	6.1788e-06	0.00011935	7	2784	21	74606	TRIAE_CS42_4DL_TGACv1_342557_AA1116570,TRIAE_CS42_4AL_TGACv1_288528_AA0951160,TRIAE_CS42_4BL_TGACv1_320456_AA1039910,TRIAE_CS42_5AL_TGACv1_376140_AA1232710,TRIAE_CS42_7DL_TGACv1_603779_AA1989110,TRIAE_CS42_7AL_TGACv1_556888_AA1772870,TRIAE_CS42_4AS_TGACv1_307361_AA1019860
GO:0008028	monocarboxylic acid transmembrane transporter activity	molecular_function	6.2574e-06	0.00012052	5	2784	9	74606	TRIAE_CS42_5BL_TGACv1_405907_AA1337450,TRIAE_CS42_5AL_TGACv1_374188_AA1192880,TRIAE_CS42_5DL_TGACv1_432946_AA1395680,TRIAE_CS42_1DL_TGACv1_062818_AA0220440,TRIAE_CS42_3B_TGACv1_223199_AA0777850
GO:0033036	macromolecule localization	biological_process	6.4349e-06	0.00012359	74	2784	1143	74606	TRIAE_CS42_4AS_TGACv1_306421_AA1007900,TRIAE_CS42_7AL_TGACv1_556695_AA1769100,TRIAE_CS42_7DS_TGACv1_623122_AA2049790,TRIAE_CS42_7BS_TGACv1_593531_AA1952260,TRIAE_CS42_5DL_TGACv1_434221_AA1432010,TRIAE_CS42_2BL_TGACv1_130384_AA0410080,TRIAE_CS42_4DS_TGACv1_361471_AA1168550,TRIAE_CS42_5DL_TGACv1_434879_AA1443050,TRIAE_CS42_2DL_TGACv1_160210_AA0548190,TRIAE_CS42_5AL_TGACv1_375755_AA1226710,TRIAE_CS4…
GO:0009226	nucleotide-sugar biosynthetic process	biological_process	6.5439e-06	0.00012532	8	2784	30	74606	TRIAE_CS42_6DL_TGACv1_528145_AA1711960,TRIAE_CS42_6DL_TGACv1_527865_AA1709380,TRIAE_CS42_3AS_TGACv1_211158_AA0686190,TRIAE_CS42_7BL_TGACv1_578013_AA1887930,TRIAE_CS42_7DL_TGACv1_603622_AA1986410,TRIAE_CS42_6AL_TGACv1_473897_AA1533380,TRIAE_CS42_2AL_TGACv1_093532_AA0281910,TRIAE_CS42_7AL_TGACv1_558796_AA1796130
GO:0030658	transport vesicle membrane	cellular_component	6.9568e-06	0.00013285	13	2784	84	74606	TRIAE_CS42_7DL_TGACv1_602635_AA1963430,TRIAE_CS42_4DS_TGACv1_361471_AA1168550,TRIAE_CS42_4BS_TGACv1_328452_AA1088030,TRIAE_CS42_4BL_TGACv1_320261_AA1032800,TRIAE_CS42_4DS_TGACv1_362497_AA1180110,TRIAE_CS42_5AL_TGACv1_378411_AA1253160,TRIAE_CS42_U_TGACv1_642234_AA2113860,TRIAE_CS42_4AL_TGACv1_288747_AA0957130,TRIAE_CS42_4AS_TGACv1_306421_AA1007900,TRIAE_CS42_U_TGACv1_642388_AA2116800,TRIAE_CS42_7A…
GO:0019867	outer membrane	cellular_component	7.0144e-06	0.00013357	17	2784	122	74606	TRIAE_CS42_4AS_TGACv1_307078_AA1016740,TRIAE_CS42_4BL_TGACv1_321851_AA1066240,TRIAE_CS42_5AS_TGACv1_393382_AA1272050,TRIAE_CS42_3B_TGACv1_223525_AA0783520,TRIAE_CS42_3B_TGACv1_222757_AA0770040,TRIAE_CS42_3AL_TGACv1_194730_AA0638300,TRIAE_CS42_5AL_TGACv1_378731_AA1254390,TRIAE_CS42_4DL_TGACv1_343137_AA1130350,TRIAE_CS42_6DL_TGACv1_528046_AA1711090,TRIAE_CS42_5AL_TGACv1_376343_AA1235470,TRIAE_CS42_…
GO:0045017	glycerolipid biosynthetic process	biological_process	7.3741e-06	0.00014002	19	2784	170	74606	TRIAE_CS42_5DL_TGACv1_433855_AA1423770,TRIAE_CS42_6BS_TGACv1_514507_AA1660710,TRIAE_CS42_U_TGACv1_643011_AA2126070,TRIAE_CS42_3DL_TGACv1_254806_AA0896680,TRIAE_CS42_2BS_TGACv1_146926_AA0475500,TRIAE_CS42_1BL_TGACv1_032207_AA0126810,TRIAE_CS42_4AL_TGACv1_288281_AA0943580,TRIAE_CS42_1AL_TGACv1_003920_AA0051930,TRIAE_CS42_6AS_TGACv1_485300_AA1542750,TRIAE_CS42_1DL_TGACv1_063094_AA0223830,TRIAE_CS42_…
GO:0046148	pigment biosynthetic process	biological_process	7.5346e-06	0.00014267	18	2784	152	74606	TRIAE_CS42_3AL_TGACv1_197079_AA0664730,TRIAE_CS42_4DL_TGACv1_345711_AA1154220,TRIAE_CS42_1DS_TGACv1_082196_AA0264140,TRIAE_CS42_3DS_TGACv1_273835_AA0933610,TRIAE_CS42_2AS_TGACv1_112052_AA0328860,TRIAE_CS42_4AL_TGACv1_289727_AA0976030,TRIAE_CS42_3B_TGACv1_224606_AA0798680,TRIAE_CS42_2DS_TGACv1_177352_AA0574250,TRIAE_CS42_2BS_TGACv1_146261_AA0460710,TRIAE_CS42_4AS_TGACv1_306569_AA1010320,TRIAE_CS42…
GO:0005996	monosaccharide metabolic process	biological_process	7.9409e-06	0.00014994	26	2784	284	74606	TRIAE_CS42_6BL_TGACv1_502089_AA1623000,TRIAE_CS42_2AL_TGACv1_093541_AA0282230,TRIAE_CS42_4BL_TGACv1_320480_AA1040880,TRIAE_CS42_4AS_TGACv1_306645_AA1011430,TRIAE_CS42_1DS_TGACv1_081340_AA0260080,TRIAE_CS42_3AL_TGACv1_196039_AA0656760,TRIAE_CS42_6AL_TGACv1_473639_AA1532140,TRIAE_CS42_4BL_TGACv1_321135_AA1056010,TRIAE_CS42_4AL_TGACv1_288170_AA0939380,TRIAE_CS42_2BL_TGACv1_131119_AA0422830,TRIAE_CS4…
GO:0006166	purine ribonucleoside salvage	biological_process	8.3053e-06	0.00015638	4	2784	5	74606	TRIAE_CS42_6BL_TGACv1_499360_AA1579440,TRIAE_CS42_6AL_TGACv1_473321_AA1530120,TRIAE_CS42_1AS_TGACv1_019145_AA0061580,TRIAE_CS42_6DL_TGACv1_526952_AA1695860
GO:0048278	vesicle docking	biological_process	8.5842e-06	0.00016118	9	2784	43	74606	TRIAE_CS42_6AL_TGACv1_471366_AA1507720,TRIAE_CS42_5AS_TGACv1_394157_AA1278470,TRIAE_CS42_5AS_TGACv1_394157_AA1278420,TRIAE_CS42_5DS_TGACv1_456933_AA1479990,TRIAE_CS42_6BL_TGACv1_500073_AA1598240,TRIAE_CS42_6BL_TGACv1_499660_AA1588490,TRIAE_CS42_5BS_TGACv1_424367_AA1389100,TRIAE_CS42_6AS_TGACv1_485668_AA1549820,TRIAE_CS42_6DL_TGACv1_526657_AA1689120
GO:0019252	starch biosynthetic process	biological_process	9.091e-06	0.00017022	9	2784	43	74606	TRIAE_CS42_5DL_TGACv1_435303_AA1448600,TRIAE_CS42_2AL_TGACv1_093163_AA0273760,TRIAE_CS42_2DL_TGACv1_159587_AA0540290,TRIAE_CS42_1DL_TGACv1_062182_AA0210070,TRIAE_CS42_2BL_TGACv1_131614_AA0429850,TRIAE_CS42_1BL_TGACv1_031712_AA0119450,TRIAE_CS42_1AL_TGACv1_000384_AA0010710,TRIAE_CS42_1BL_TGACv1_030553_AA0093880,TRIAE_CS42_1BL_TGACv1_031136_AA0108420
GO:0006108	malate metabolic process	biological_process	9.1881e-06	0.00017156	7	2784	22	74606	TRIAE_CS42_3B_TGACv1_223879_AA0788930,TRIAE_CS42_7BL_TGACv1_578944_AA1902350,TRIAE_CS42_1AL_TGACv1_002631_AA0043990,TRIAE_CS42_1BL_TGACv1_031464_AA0114600,TRIAE_CS42_1DL_TGACv1_061661_AA0201230,TRIAE_CS42_1AL_TGACv1_000087_AA0002830,TRIAE_CS42_1BL_TGACv1_030950_AA0104200
GO:0005315	inorganic phosphate transmembrane transporter activity	molecular_function	9.3203e-06	0.00017355	9	2784	40	74606	TRIAE_CS42_3AS_TGACv1_210574_AA0675360,TRIAE_CS42_6AL_TGACv1_470942_AA1499130,TRIAE_CS42_4AL_TGACv1_289623_AA0974220,TRIAE_CS42_5DL_TGACv1_434482_AA1436750,TRIAE_CS42_3B_TGACv1_220956_AA0724960,TRIAE_CS42_4BS_TGACv1_329699_AA1103360,TRIAE_CS42_5AL_TGACv1_378077_AA1251060,TRIAE_CS42_3DS_TGACv1_272293_AA0918520,TRIAE_CS42_4DS_TGACv1_361391_AA1166860
GO:0004017	adenylate kinase activity	molecular_function	1.0448e-05	0.000194	7	2784	21	74606	TRIAE_CS42_U_TGACv1_642445_AA2117740,TRIAE_CS42_7BL_TGACv1_579222_AA1905450,TRIAE_CS42_4DL_TGACv1_343142_AA1130440,TRIAE_CS42_5DS_TGACv1_456506_AA1472400,TRIAE_CS42_4BL_TGACv1_320339_AA1035830,TRIAE_CS42_5BS_TGACv1_424804_AA1391850,TRIAE_CS42_7DL_TGACv1_602656_AA1964250
GO:0004312	fatty acid synthase activity	molecular_function	1.1187e-05	0.00020716	6	2784	16	74606	TRIAE_CS42_4DL_TGACv1_343777_AA1139610,TRIAE_CS42_2BL_TGACv1_129465_AA0384880,TRIAE_CS42_4AS_TGACv1_306673_AA1011900,TRIAE_CS42_2DL_TGACv1_162478_AA0562870,TRIAE_CS42_U_TGACv1_643054_AA2126680,TRIAE_CS42_2AL_TGACv1_093558_AA0282560
GO:0012505	endomembrane system	cellular_component	1.2109e-05	0.00022362	89	2784	1551	74606	TRIAE_CS42_1BL_TGACv1_031047_AA0106660,TRIAE_CS42_4DL_TGACv1_343056_AA1128680,TRIAE_CS42_4AL_TGACv1_288813_AA0958740,TRIAE_CS42_2AS_TGACv1_113808_AA0360930,TRIAE_CS42_3AS_TGACv1_211332_AA0688720,TRIAE_CS42_4DL_TGACv1_342471_AA1114460,TRIAE_CS42_4DS_TGACv1_361383_AA1166600,TRIAE_CS42_5DS_TGACv1_458693_AA1494370,TRIAE_CS42_3DL_TGACv1_250864_AA0874390,TRIAE_CS42_U_TGACv1_641043_AA2083140,TRIAE_CS42_…
GO:0042440	pigment metabolic process	biological_process	1.2367e-05	0.00022776	21	2784	203	74606	TRIAE_CS42_4DL_TGACv1_343749_AA1139150,TRIAE_CS42_3DS_TGACv1_273835_AA0933610,TRIAE_CS42_1DS_TGACv1_082196_AA0264140,TRIAE_CS42_4DL_TGACv1_345711_AA1154220,TRIAE_CS42_3AL_TGACv1_197079_AA0664730,TRIAE_CS42_2DS_TGACv1_177352_AA0574250,TRIAE_CS42_3B_TGACv1_224606_AA0798680,TRIAE_CS42_4AL_TGACv1_289727_AA0976030,TRIAE_CS42_2AS_TGACv1_112052_AA0328860,TRIAE_CS42_1BS_TGACv1_050930_AA0176780,TRIAE_CS42…
GO:0006650	glycerophospholipid metabolic process	biological_process	1.2453e-05	0.00022827	25	2784	298	74606	TRIAE_CS42_3DL_TGACv1_254806_AA0896680,TRIAE_CS42_2BS_TGACv1_146926_AA0475500,TRIAE_CS42_1BL_TGACv1_032207_AA0126810,TRIAE_CS42_4AL_TGACv1_288281_AA0943580,TRIAE_CS42_5DL_TGACv1_433855_AA1423770,TRIAE_CS42_6BS_TGACv1_514507_AA1660710,TRIAE_CS42_2DS_TGACv1_177763_AA0584180,TRIAE_CS42_6DL_TGACv1_527936_AA1710100,TRIAE_CS42_U_TGACv1_643011_AA2126070,TRIAE_CS42_1DL_TGACv1_063094_AA0223830,TRIAE_CS42_…
GO:0006002	fructose 6-phosphate metabolic process	biological_process	1.2463e-05	0.00022827	8	2784	33	74606	TRIAE_CS42_4AL_TGACv1_290300_AA0983760,TRIAE_CS42_7AS_TGACv1_570937_AA1842720,TRIAE_CS42_1DL_TGACv1_063603_AA0229020,TRIAE_CS42_7DS_TGACv1_622764_AA2045010,TRIAE_CS42_7AS_TGACv1_571836_AA1850200,TRIAE_CS42_6AL_TGACv1_471645_AA1512290,TRIAE_CS42_7BS_TGACv1_592594_AA1941060,TRIAE_CS42_1AL_TGACv1_000755_AA0018450
GO:0030125	clathrin vesicle coat	cellular_component	1.2557e-05	0.00022875	6	2784	18	74606	TRIAE_CS42_4AL_TGACv1_288747_AA0957130,TRIAE_CS42_7DL_TGACv1_602635_AA1963430,TRIAE_CS42_7AL_TGACv1_556695_AA1769100,TRIAE_CS42_5AL_TGACv1_378411_AA1253160,TRIAE_CS42_4DS_TGACv1_362497_AA1180110,TRIAE_CS42_4BS_TGACv1_328452_AA1088030
GO:0030130	clathrin coat of trans-Golgi network vesicle	cellular_component	1.2557e-05	0.00022875	6	2784	18	74606	TRIAE_CS42_4AL_TGACv1_288747_AA0957130,TRIAE_CS42_7DL_TGACv1_602635_AA1963430,TRIAE_CS42_5AL_TGACv1_378411_AA1253160,TRIAE_CS42_4BS_TGACv1_328452_AA1088030,TRIAE_CS42_4DS_TGACv1_362497_AA1180110,TRIAE_CS42_7AL_TGACv1_556695_AA1769100
GO:0030133	transport vesicle	cellular_component	1.5191e-05	0.00027599	13	2784	91	74606	TRIAE_CS42_4AL_TGACv1_288747_AA0957130,TRIAE_CS42_U_TGACv1_642388_AA2116800,TRIAE_CS42_4AS_TGACv1_306421_AA1007900,TRIAE_CS42_2DL_TGACv1_158815_AA0526570,TRIAE_CS42_7AL_TGACv1_556695_AA1769100,TRIAE_CS42_6AL_TGACv1_471165_AA1503930,TRIAE_CS42_7DL_TGACv1_602635_AA1963430,TRIAE_CS42_4DS_TGACv1_361471_AA1168550,TRIAE_CS42_U_TGACv1_642234_AA2113860,TRIAE_CS42_4BL_TGACv1_320261_AA1032800,TRIAE_CS42_4B…
GO:0016747	transferase activity, transferring acyl groups other than amino-acyl groups	molecular_function	1.6092e-05	0.0002903	74	2784	1214	74606	TRIAE_CS42_5BL_TGACv1_404851_AA1312860,TRIAE_CS42_6BL_TGACv1_499343_AA1578600,TRIAE_CS42_6AL_TGACv1_472181_AA1518660,TRIAE_CS42_2BL_TGACv1_129465_AA0384880,TRIAE_CS42_2AL_TGACv1_094592_AA0300030,TRIAE_CS42_5BL_TGACv1_404443_AA1299940,TRIAE_CS42_4BS_TGACv1_327862_AA1076800,TRIAE_CS42_U_TGACv1_643054_AA2126680,TRIAE_CS42_3B_TGACv1_225133_AA0805330,TRIAE_CS42_5BS_TGACv1_424669_AA1391210,TRIAE_CS42_4…
GO:0001731	formation of translation preinitiation complex	biological_process	1.6281e-05	0.0002903	10	2784	55	74606	TRIAE_CS42_5DL_TGACv1_435150_AA1446750,TRIAE_CS42_3B_TGACv1_223624_AA0784810,TRIAE_CS42_U_TGACv1_642463_AA2118090,TRIAE_CS42_5AL_TGACv1_374249_AA1195140,TRIAE_CS42_5AL_TGACv1_377520_AA1247660,TRIAE_CS42_4BL_TGACv1_320636_AA1045250,TRIAE_CS42_6AS_TGACv1_486894_AA1566280,TRIAE_CS42_5BL_TGACv1_405701_AA1333330,TRIAE_CS42_5BL_TGACv1_404980_AA1317000,TRIAE_CS42_4AL_TGACv1_289336_AA0969290
GO:0001732	formation of cytoplasmic translation initiation complex	biological_process	1.6281e-05	0.0002903	10	2784	55	74606	TRIAE_CS42_4BL_TGACv1_320636_AA1045250,TRIAE_CS42_6AS_TGACv1_486894_AA1566280,TRIAE_CS42_4AL_TGACv1_289336_AA0969290,TRIAE_CS42_5BL_TGACv1_404980_AA1317000,TRIAE_CS42_5BL_TGACv1_405701_AA1333330,TRIAE_CS42_3B_TGACv1_223624_AA0784810,TRIAE_CS42_5DL_TGACv1_435150_AA1446750,TRIAE_CS42_U_TGACv1_642463_AA2118090,TRIAE_CS42_5AL_TGACv1_374249_AA1195140,TRIAE_CS42_5AL_TGACv1_377520_AA1247660
GO:0002183	cytoplasmic translational initiation	biological_process	1.6281e-05	0.0002903	10	2784	55	74606	TRIAE_CS42_5AL_TGACv1_377520_AA1247660,TRIAE_CS42_5AL_TGACv1_374249_AA1195140,TRIAE_CS42_U_TGACv1_642463_AA2118090,TRIAE_CS42_3B_TGACv1_223624_AA0784810,TRIAE_CS42_5DL_TGACv1_435150_AA1446750,TRIAE_CS42_4AL_TGACv1_289336_AA0969290,TRIAE_CS42_5BL_TGACv1_405701_AA1333330,TRIAE_CS42_5BL_TGACv1_404980_AA1317000,TRIAE_CS42_6AS_TGACv1_486894_AA1566280,TRIAE_CS42_4BL_TGACv1_320636_AA1045250
GO:0016282	eukaryotic 43S preinitiation complex	cellular_component	1.6281e-05	0.0002903	10	2784	55	74606	TRIAE_CS42_5AL_TGACv1_377520_AA1247660,TRIAE_CS42_5AL_TGACv1_374249_AA1195140,TRIAE_CS42_3B_TGACv1_223624_AA0784810,TRIAE_CS42_5DL_TGACv1_435150_AA1446750,TRIAE_CS42_U_TGACv1_642463_AA2118090,TRIAE_CS42_4AL_TGACv1_289336_AA0969290,TRIAE_CS42_5BL_TGACv1_404980_AA1317000,TRIAE_CS42_5BL_TGACv1_405701_AA1333330,TRIAE_CS42_4BL_TGACv1_320636_AA1045250,TRIAE_CS42_6AS_TGACv1_486894_AA1566280
GO:0033290	eukaryotic 48S preinitiation complex	cellular_component	1.6281e-05	0.0002903	10	2784	55	74606	TRIAE_CS42_6AS_TGACv1_486894_AA1566280,TRIAE_CS42_4BL_TGACv1_320636_AA1045250,TRIAE_CS42_4AL_TGACv1_289336_AA0969290,TRIAE_CS42_5BL_TGACv1_405701_AA1333330,TRIAE_CS42_5BL_TGACv1_404980_AA1317000,TRIAE_CS42_U_TGACv1_642463_AA2118090,TRIAE_CS42_3B_TGACv1_223624_AA0784810,TRIAE_CS42_5DL_TGACv1_435150_AA1446750,TRIAE_CS42_5AL_TGACv1_377520_AA1247660,TRIAE_CS42_5AL_TGACv1_374249_AA1195140
GO:0070993	translation preinitiation complex	cellular_component	1.6281e-05	0.0002903	10	2784	55	74606	TRIAE_CS42_4AL_TGACv1_289336_AA0969290,TRIAE_CS42_5BL_TGACv1_404980_AA1317000,TRIAE_CS42_5BL_TGACv1_405701_AA1333330,TRIAE_CS42_4BL_TGACv1_320636_AA1045250,TRIAE_CS42_6AS_TGACv1_486894_AA1566280,TRIAE_CS42_5AL_TGACv1_377520_AA1247660,TRIAE_CS42_5AL_TGACv1_374249_AA1195140,TRIAE_CS42_3B_TGACv1_223624_AA0784810,TRIAE_CS42_5DL_TGACv1_435150_AA1446750,TRIAE_CS42_U_TGACv1_642463_AA2118090
GO:0016120	carotene biosynthetic process	biological_process	1.7754e-05	0.00031572	4	2784	6	74606	TRIAE_CS42_2BS_TGACv1_146261_AA0460710,TRIAE_CS42_2AS_TGACv1_112052_AA0328860,TRIAE_CS42_2DS_TGACv1_177352_AA0574250,TRIAE_CS42_2BS_TGACv1_145984_AA0451870
GO:0009108	coenzyme biosynthetic process	biological_process	1.8743e-05	0.00033243	23	2784	230	74606	TRIAE_CS42_6DL_TGACv1_526382_AA1681340,TRIAE_CS42_4AL_TGACv1_290372_AA0984620,TRIAE_CS42_5AL_TGACv1_374789_AA1209000,TRIAE_CS42_2AS_TGACv1_112938_AA0348140,TRIAE_CS42_6AL_TGACv1_475648_AA1536640,TRIAE_CS42_6BL_TGACv1_499577_AA1586520,TRIAE_CS42_7AS_TGACv1_571112_AA1844780,TRIAE_CS42_5AL_TGACv1_376570_AA1238560,TRIAE_CS42_6BL_TGACv1_500297_AA1602810,TRIAE_CS42_5DL_TGACv1_435540_AA1451810,TRIAE_CS4…
GO:0016108	tetraterpenoid metabolic process	biological_process	1.89e-05	0.00033345	9	2784	44	74606	TRIAE_CS42_4AL_TGACv1_289727_AA0976030,TRIAE_CS42_2AS_TGACv1_112052_AA0328860,TRIAE_CS42_3AS_TGACv1_210696_AA0677310,TRIAE_CS42_2DS_TGACv1_177352_AA0574250,TRIAE_CS42_4AL_TGACv1_289623_AA0974220,TRIAE_CS42_2BS_TGACv1_145984_AA0451870,TRIAE_CS42_2BS_TGACv1_146261_AA0460710,TRIAE_CS42_4DS_TGACv1_361391_AA1166860,TRIAE_CS42_4BS_TGACv1_329699_AA1103360
GO:0016116	carotenoid metabolic process	biological_process	1.89e-05	0.00033345	9	2784	44	74606	TRIAE_CS42_4AL_TGACv1_289623_AA0974220,TRIAE_CS42_2DS_TGACv1_177352_AA0574250,TRIAE_CS42_2BS_TGACv1_145984_AA0451870,TRIAE_CS42_4AL_TGACv1_289727_AA0976030,TRIAE_CS42_2AS_TGACv1_112052_AA0328860,TRIAE_CS42_3AS_TGACv1_210696_AA0677310,TRIAE_CS42_4DS_TGACv1_361391_AA1166860,TRIAE_CS42_4BS_TGACv1_329699_AA1103360,TRIAE_CS42_2BS_TGACv1_146261_AA0460710
GO:1902582	single-organism intracellular transport	biological_process	1.9336e-05	0.00034026	38	2784	480	74606	TRIAE_CS42_6BS_TGACv1_514140_AA1655890,TRIAE_CS42_5AL_TGACv1_374484_AA1201380,TRIAE_CS42_2DL_TGACv1_158753_AA0525450,TRIAE_CS42_6AS_TGACv1_486953_AA1566790,TRIAE_CS42_2DL_TGACv1_159701_AA0541660,TRIAE_CS42_3B_TGACv1_222044_AA0755670,TRIAE_CS42_5DL_TGACv1_433822_AA1423010,TRIAE_CS42_2AS_TGACv1_113553_AA0357680,TRIAE_CS42_5AL_TGACv1_374196_AA1193370,TRIAE_CS42_2AS_TGACv1_113808_AA0360930,TRIAE_CS42…
GO:0006446	regulation of translational initiation	biological_process	2.007e-05	0.00035225	10	2784	57	74606	TRIAE_CS42_4AL_TGACv1_289336_AA0969290,TRIAE_CS42_5BL_TGACv1_405701_AA1333330,TRIAE_CS42_5BL_TGACv1_404980_AA1317000,TRIAE_CS42_6AS_TGACv1_486894_AA1566280,TRIAE_CS42_4BL_TGACv1_320636_AA1045250,TRIAE_CS42_5AL_TGACv1_374249_AA1195140,TRIAE_CS42_5AL_TGACv1_377520_AA1247660,TRIAE_CS42_U_TGACv1_642463_AA2118090,TRIAE_CS42_3B_TGACv1_223624_AA0784810,TRIAE_CS42_5DL_TGACv1_435150_AA1446750
GO:0005911	cell-cell junction	cellular_component	2.206e-05	0.00038317	22	2784	244	74606	TRIAE_CS42_4DS_TGACv1_361934_AA1174490,TRIAE_CS42_6BL_TGACv1_500942_AA1611930,TRIAE_CS42_7DS_TGACv1_623153_AA2050180,TRIAE_CS42_6DL_TGACv1_528145_AA1711960,TRIAE_CS42_7DL_TGACv1_603800_AA1989460,TRIAE_CS42_7DL_TGACv1_603574_AA1985820,TRIAE_CS42_2BL_TGACv1_131580_AA0429350,TRIAE_CS42_6AL_TGACv1_472224_AA1519430,TRIAE_CS42_7AL_TGACv1_558294_AA1792080,TRIAE_CS42_2BL_TGACv1_129976_AA0400820,TRIAE_CS4…
GO:0009506	plasmodesma	cellular_component	2.206e-05	0.00038317	22	2784	244	74606	TRIAE_CS42_7AL_TGACv1_558055_AA1789640,TRIAE_CS42_2BL_TGACv1_131489_AA0428400,TRIAE_CS42_7BS_TGACv1_591976_AA1927160,TRIAE_CS42_1DL_TGACv1_061713_AA0202170,TRIAE_CS42_4BS_TGACv1_328586_AA1090550,TRIAE_CS42_2DL_TGACv1_161360_AA0558180,TRIAE_CS42_6AL_TGACv1_473897_AA1533380,TRIAE_CS42_4DL_TGACv1_342471_AA1114460,TRIAE_CS42_5DS_TGACv1_458693_AA1494370,TRIAE_CS42_4DS_TGACv1_361934_AA1174490,TRIAE_CS4…
GO:0030054	cell junction	cellular_component	2.206e-05	0.00038317	22	2784	244	74606	TRIAE_CS42_4DL_TGACv1_342471_AA1114460,TRIAE_CS42_5DS_TGACv1_458693_AA1494370,TRIAE_CS42_6AL_TGACv1_473897_AA1533380,TRIAE_CS42_7BS_TGACv1_591976_AA1927160,TRIAE_CS42_2BL_TGACv1_131489_AA0428400,TRIAE_CS42_7AL_TGACv1_558055_AA1789640,TRIAE_CS42_2DL_TGACv1_161360_AA0558180,TRIAE_CS42_1DL_TGACv1_061713_AA0202170,TRIAE_CS42_4BS_TGACv1_328586_AA1090550,TRIAE_CS42_6BL_TGACv1_500942_AA1611930,TRIAE_CS4…
GO:0055044	symplast	cellular_component	2.206e-05	0.00038317	22	2784	244	74606	TRIAE_CS42_2BL_TGACv1_131489_AA0428400,TRIAE_CS42_7BS_TGACv1_591976_AA1927160,TRIAE_CS42_7AL_TGACv1_558055_AA1789640,TRIAE_CS42_2DL_TGACv1_161360_AA0558180,TRIAE_CS42_4BS_TGACv1_328586_AA1090550,TRIAE_CS42_1DL_TGACv1_061713_AA0202170,TRIAE_CS42_6AL_TGACv1_473897_AA1533380,TRIAE_CS42_4DL_TGACv1_342471_AA1114460,TRIAE_CS42_5DS_TGACv1_458693_AA1494370,TRIAE_CS42_4DS_TGACv1_361934_AA1174490,TRIAE_CS4…
GO:0006818	hydrogen transport	biological_process	2.2767e-05	0.00039341	29	2784	326	74606	TRIAE_CS42_7BL_TGACv1_579063_AA1903600,TRIAE_CS42_2BL_TGACv1_130381_AA0409970,TRIAE_CS42_3DL_TGACv1_250717_AA0872310,TRIAE_CS42_7BL_TGACv1_579860_AA1910590,TRIAE_CS42_3B_TGACv1_224031_AA0791230,TRIAE_CS42_7AL_TGACv1_559344_AA1799200,TRIAE_CS42_1BL_TGACv1_031692_AA0118950,TRIAE_CS42_1AL_TGACv1_004040_AA0052320,TRIAE_CS42_5DL_TGACv1_436184_AA1459030,TRIAE_CS42_3AL_TGACv1_195562_AA0651220,TRIAE_CS42…
GO:0015992	proton transport	biological_process	2.2767e-05	0.00039341	29	2784	326	74606	TRIAE_CS42_3DL_TGACv1_250717_AA0872310,TRIAE_CS42_7BL_TGACv1_579063_AA1903600,TRIAE_CS42_2BL_TGACv1_130381_AA0409970,TRIAE_CS42_3B_TGACv1_224031_AA0791230,TRIAE_CS42_7BL_TGACv1_579860_AA1910590,TRIAE_CS42_7AL_TGACv1_559344_AA1799200,TRIAE_CS42_1BL_TGACv1_031692_AA0118950,TRIAE_CS42_5DL_TGACv1_436184_AA1459030,TRIAE_CS42_1AL_TGACv1_004040_AA0052320,TRIAE_CS42_7AL_TGACv1_558294_AA1792080,TRIAE_CS42…
GO:0015121	phosphoenolpyruvate:phosphate antiporter activity	molecular_function	2.3208e-05	0.00039395	4	2784	6	74606	TRIAE_CS42_5AL_TGACv1_374188_AA1192880,TRIAE_CS42_5DL_TGACv1_432946_AA1395680,TRIAE_CS42_5BL_TGACv1_405907_AA1337450,TRIAE_CS42_3B_TGACv1_223199_AA0777850
GO:0015714	phosphoenolpyruvate transport	biological_process	2.3208e-05	0.00039395	4	2784	6	74606	TRIAE_CS42_3B_TGACv1_223199_AA0777850,TRIAE_CS42_5BL_TGACv1_405907_AA1337450,TRIAE_CS42_5DL_TGACv1_432946_AA1395680,TRIAE_CS42_5AL_TGACv1_374188_AA1192880
GO:0015717	triose phosphate transport	biological_process	2.3208e-05	0.00039395	4	2784	6	74606	TRIAE_CS42_3B_TGACv1_223199_AA0777850,TRIAE_CS42_5DL_TGACv1_432946_AA1395680,TRIAE_CS42_5AL_TGACv1_374188_AA1192880,TRIAE_CS42_5BL_TGACv1_405907_AA1337450
GO:0035436	triose phosphate transmembrane transport	biological_process	2.3208e-05	0.00039395	4	2784	6	74606	TRIAE_CS42_3B_TGACv1_223199_AA0777850,TRIAE_CS42_5BL_TGACv1_405907_AA1337450,TRIAE_CS42_5AL_TGACv1_374188_AA1192880,TRIAE_CS42_5DL_TGACv1_432946_AA1395680
GO:0071917	triose-phosphate transmembrane transporter activity	molecular_function	2.3208e-05	0.00039395	4	2784	6	74606	TRIAE_CS42_5BL_TGACv1_405907_AA1337450,TRIAE_CS42_5AL_TGACv1_374188_AA1192880,TRIAE_CS42_5DL_TGACv1_432946_AA1395680,TRIAE_CS42_3B_TGACv1_223199_AA0777850
GO:0089721	phosphoenolpyruvate transmembrane transporter activity	molecular_function	2.3208e-05	0.00039395	4	2784	6	74606	TRIAE_CS42_5BL_TGACv1_405907_AA1337450,TRIAE_CS42_5AL_TGACv1_374188_AA1192880,TRIAE_CS42_5DL_TGACv1_432946_AA1395680,TRIAE_CS42_3B_TGACv1_223199_AA0777850
GO:0089722	phosphoenolpyruvate transmembrane transport	biological_process	2.3208e-05	0.00039395	4	2784	6	74606	TRIAE_CS42_5BL_TGACv1_405907_AA1337450,TRIAE_CS42_5DL_TGACv1_432946_AA1395680,TRIAE_CS42_5AL_TGACv1_374188_AA1192880,TRIAE_CS42_3B_TGACv1_223199_AA0777850
GO:0006720	isoprenoid metabolic process	biological_process	2.3345e-05	0.00039527	19	2784	178	74606	TRIAE_CS42_4BS_TGACv1_329699_AA1103360,TRIAE_CS42_5AL_TGACv1_378173_AA1251720,TRIAE_CS42_2BS_TGACv1_146261_AA0460710,TRIAE_CS42_2BS_TGACv1_145984_AA0451870,TRIAE_CS42_4DL_TGACv1_343496_AA1135330,TRIAE_CS42_5DL_TGACv1_434775_AA1441440,TRIAE_CS42_4AL_TGACv1_289623_AA0974220,TRIAE_CS42_3AS_TGACv1_210696_AA0677310,TRIAE_CS42_1BL_TGACv1_031194_AA0109500,TRIAE_CS42_7DS_TGACv1_622404_AA2038940,TRIAE_CS4…
GO:0019200	carbohydrate kinase activity	molecular_function	2.3433e-05	0.00039577	12	2784	84	74606	TRIAE_CS42_7BS_TGACv1_592594_AA1941060,TRIAE_CS42_7BS_TGACv1_592259_AA1934400,TRIAE_CS42_1AL_TGACv1_000755_AA0018450,TRIAE_CS42_6AL_TGACv1_471645_AA1512290,TRIAE_CS42_1DL_TGACv1_063603_AA0229020,TRIAE_CS42_4AS_TGACv1_306645_AA1011430,TRIAE_CS42_7DS_TGACv1_622764_AA2045010,TRIAE_CS42_7AS_TGACv1_571836_AA1850200,TRIAE_CS42_7AS_TGACv1_570937_AA1842720,TRIAE_CS42_4AL_TGACv1_290300_AA0983760,TRIAE_CS4…
GO:0000015	phosphopyruvate hydratase complex	cellular_component	2.3995e-05	0.00040324	6	2784	17	74606	TRIAE_CS42_5AS_TGACv1_394202_AA1278730,TRIAE_CS42_5DS_TGACv1_457334_AA1485300,TRIAE_CS42_5AS_TGACv1_393357_AA1271740,TRIAE_CS42_5DL_TGACv1_433836_AA1423410,TRIAE_CS42_5BS_TGACv1_423965_AA1385430,TRIAE_CS42_5BS_TGACv1_423649_AA1381290
GO:0004634	phosphopyruvate hydratase activity	molecular_function	2.3995e-05	0.00040324	6	2784	17	74606	TRIAE_CS42_5BS_TGACv1_423649_AA1381290,TRIAE_CS42_5BS_TGACv1_423965_AA1385430,TRIAE_CS42_5DL_TGACv1_433836_AA1423410,TRIAE_CS42_5AS_TGACv1_393357_AA1271740,TRIAE_CS42_5AS_TGACv1_394202_AA1278730,TRIAE_CS42_5DS_TGACv1_457334_AA1485300
GO:0034220	ion transmembrane transport	biological_process	2.5761e-05	0.00043183	56	2784	895	74606	TRIAE_CS42_2BL_TGACv1_129973_AA0400750,TRIAE_CS42_4AL_TGACv1_288269_AA0942920,TRIAE_CS42_7BL_TGACv1_579860_AA1910590,TRIAE_CS42_3B_TGACv1_224031_AA0791230,TRIAE_CS42_3DL_TGACv1_249213_AA0841560,TRIAE_CS42_5DL_TGACv1_433496_AA1414720,TRIAE_CS42_4BL_TGACv1_321851_AA1066240,TRIAE_CS42_2BL_TGACv1_130381_AA0409970,TRIAE_CS42_3DL_TGACv1_250717_AA0872310,TRIAE_CS42_7AL_TGACv1_559344_AA1799200,TRIAE_CS42…
GO:0047334	diphosphate-fructose-6-phosphate 1-phosphotransferase activity	molecular_function	2.598e-05	0.00043443	5	2784	12	74606	TRIAE_CS42_7AS_TGACv1_571836_AA1850200,TRIAE_CS42_7DS_TGACv1_622764_AA2045010,TRIAE_CS42_7BS_TGACv1_592594_AA1941060,TRIAE_CS42_6AL_TGACv1_471645_AA1512290,TRIAE_CS42_7AS_TGACv1_570937_AA1842720
GO:0015994	chlorophyll metabolic process	biological_process	2.6582e-05	0.00044339	12	2784	81	74606	TRIAE_CS42_3AS_TGACv1_211390_AA0689620,TRIAE_CS42_3B_TGACv1_224016_AA0791010,TRIAE_CS42_4AL_TGACv1_289727_AA0976030,TRIAE_CS42_3B_TGACv1_224606_AA0798680,TRIAE_CS42_1BL_TGACv1_033227_AA0137910,TRIAE_CS42_2AS_TGACv1_113806_AA0360900,TRIAE_CS42_3AL_TGACv1_197079_AA0664730,TRIAE_CS42_2BS_TGACv1_146261_AA0460710,TRIAE_CS42_1AL_TGACv1_000695_AA0017180,TRIAE_CS42_4BL_TGACv1_320729_AA1047290,TRIAE_CS42_…
GO:0015078	hydrogen ion transmembrane transporter activity	molecular_function	2.6999e-05	0.0004491	26	2784	276	74606	TRIAE_CS42_3DL_TGACv1_250717_AA0872310,TRIAE_CS42_7BL_TGACv1_579063_AA1903600,TRIAE_CS42_2BL_TGACv1_130381_AA0409970,TRIAE_CS42_3B_TGACv1_224031_AA0791230,TRIAE_CS42_7BL_TGACv1_579860_AA1910590,TRIAE_CS42_1BL_TGACv1_031692_AA0118950,TRIAE_CS42_7AL_TGACv1_559344_AA1799200,TRIAE_CS42_5DL_TGACv1_436184_AA1459030,TRIAE_CS42_1AL_TGACv1_004040_AA0052320,TRIAE_CS42_7AL_TGACv1_558294_AA1792080,TRIAE_CS42…
GO:0010028	xanthophyll cycle	biological_process	2.7326e-05	0.0004491	3	2784	3	74606	TRIAE_CS42_4DS_TGACv1_361391_AA1166860,TRIAE_CS42_4AL_TGACv1_289623_AA0974220,TRIAE_CS42_4BS_TGACv1_329699_AA1103360
GO:0015229	L-ascorbic acid transporter activity	molecular_function	2.7326e-05	0.0004491	3	2784	3	74606	TRIAE_CS42_4BS_TGACv1_329699_AA1103360,TRIAE_CS42_4AL_TGACv1_289623_AA0974220,TRIAE_CS42_4DS_TGACv1_361391_AA1166860
GO:0015882	L-ascorbic acid transport	biological_process	2.7326e-05	0.0004491	3	2784	3	74606	TRIAE_CS42_4DS_TGACv1_361391_AA1166860,TRIAE_CS42_4AL_TGACv1_289623_AA0974220,TRIAE_CS42_4BS_TGACv1_329699_AA1103360
GO:0051180	vitamin transport	biological_process	2.7326e-05	0.0004491	3	2784	3	74606	TRIAE_CS42_4DS_TGACv1_361391_AA1166860,TRIAE_CS42_4AL_TGACv1_289623_AA0974220,TRIAE_CS42_4BS_TGACv1_329699_AA1103360
GO:0051183	vitamin transporter activity	molecular_function	2.7326e-05	0.0004491	3	2784	3	74606	TRIAE_CS42_4AL_TGACv1_289623_AA0974220,TRIAE_CS42_4DS_TGACv1_361391_AA1166860,TRIAE_CS42_4BS_TGACv1_329699_AA1103360
GO:0002181	cytoplasmic translation	biological_process	2.7621e-05	0.00045285	10	2784	58	74606	TRIAE_CS42_3B_TGACv1_223624_AA0784810,TRIAE_CS42_5DL_TGACv1_435150_AA1446750,TRIAE_CS42_U_TGACv1_642463_AA2118090,TRIAE_CS42_5AL_TGACv1_374249_AA1195140,TRIAE_CS42_5AL_TGACv1_377520_AA1247660,TRIAE_CS42_4BL_TGACv1_320636_AA1045250,TRIAE_CS42_6AS_TGACv1_486894_AA1566280,TRIAE_CS42_4AL_TGACv1_289336_AA0969290,TRIAE_CS42_5BL_TGACv1_404980_AA1317000,TRIAE_CS42_5BL_TGACv1_405701_AA1333330
GO:0012510	trans-Golgi network transport vesicle membrane	cellular_component	3.0145e-05	0.00049183	6	2784	21	74606	TRIAE_CS42_5AL_TGACv1_378411_AA1253160,TRIAE_CS42_4DS_TGACv1_362497_AA1180110,TRIAE_CS42_4BS_TGACv1_328452_AA1088030,TRIAE_CS42_7AL_TGACv1_556695_AA1769100,TRIAE_CS42_4AL_TGACv1_288747_AA0957130,TRIAE_CS42_7DL_TGACv1_602635_AA1963430
GO:0030665	clathrin-coated vesicle membrane	cellular_component	3.0145e-05	0.00049183	6	2784	21	74606	TRIAE_CS42_4AL_TGACv1_288747_AA0957130,TRIAE_CS42_7DL_TGACv1_602635_AA1963430,TRIAE_CS42_4DS_TGACv1_362497_AA1180110,TRIAE_CS42_5AL_TGACv1_378411_AA1253160,TRIAE_CS42_4BS_TGACv1_328452_AA1088030,TRIAE_CS42_7AL_TGACv1_556695_AA1769100
GO:0044431	Golgi apparatus part	cellular_component	3.0571e-05	0.0004971	33	2784	448	74606	TRIAE_CS42_1BL_TGACv1_031047_AA0106660,TRIAE_CS42_5AL_TGACv1_378411_AA1253160,TRIAE_CS42_4AL_TGACv1_288813_AA0958740,TRIAE_CS42_6BS_TGACv1_514683_AA1663200,TRIAE_CS42_6DS_TGACv1_542583_AA1724790,TRIAE_CS42_5DS_TGACv1_458693_AA1494370,TRIAE_CS42_U_TGACv1_641043_AA2083140,TRIAE_CS42_4DS_TGACv1_362497_AA1180110,TRIAE_CS42_2DL_TGACv1_157905_AA0501220,TRIAE_CS42_7AS_TGACv1_571423_AA1847600,TRIAE_CS42_…
GO:0004512	inositol-3-phosphate synthase activity	molecular_function	3.0616e-05	0.0004971	3	2784	3	74606	TRIAE_CS42_4AS_TGACv1_307361_AA1019860,TRIAE_CS42_4BL_TGACv1_320456_AA1039910,TRIAE_CS42_4DL_TGACv1_342557_AA1116570
GO:0006778	porphyrin-containing compound metabolic process	biological_process	3.1108e-05	0.00050388	17	2784	150	74606	TRIAE_CS42_1AL_TGACv1_000695_AA0017180,TRIAE_CS42_2BS_TGACv1_146261_AA0460710,TRIAE_CS42_4AS_TGACv1_306569_AA1010320,TRIAE_CS42_4BL_TGACv1_320729_AA1047290,TRIAE_CS42_1BS_TGACv1_050930_AA0176780,TRIAE_CS42_3AS_TGACv1_211390_AA0689620,TRIAE_CS42_3B_TGACv1_224016_AA0791010,TRIAE_CS42_2AS_TGACv1_113806_AA0360900,TRIAE_CS42_3AL_TGACv1_197079_AA0664730,TRIAE_CS42_4DL_TGACv1_345711_AA1154220,TRIAE_CS42…
GO:0051082	unfolded protein binding	molecular_function	3.1525e-05	0.00050941	18	2784	165	74606	TRIAE_CS42_U_TGACv1_642785_AA2123220,TRIAE_CS42_7BS_TGACv1_593884_AA1954980,TRIAE_CS42_4DL_TGACv1_343081_AA1129160,TRIAE_CS42_4BL_TGACv1_322527_AA1071800,TRIAE_CS42_5AS_TGACv1_392582_AA1261270,TRIAE_CS42_7AL_TGACv1_558076_AA1789880,TRIAE_CS42_5AL_TGACv1_373991_AA1186860,TRIAE_CS42_3DS_TGACv1_272389_AA0920080,TRIAE_CS42_1BL_TGACv1_031589_AA0116600,TRIAE_CS42_1DL_TGACv1_061096_AA0185030,TRIAE_CS42_…
GO:0009225	nucleotide-sugar metabolic process	biological_process	3.2735e-05	0.00052768	9	2784	48	74606	TRIAE_CS42_6DL_TGACv1_528145_AA1711960,TRIAE_CS42_6DL_TGACv1_527865_AA1709380,TRIAE_CS42_3AS_TGACv1_211158_AA0686190,TRIAE_CS42_7DL_TGACv1_603622_AA1986410,TRIAE_CS42_7BL_TGACv1_578013_AA1887930,TRIAE_CS42_6AL_TGACv1_473897_AA1533380,TRIAE_CS42_2AL_TGACv1_093532_AA0281910,TRIAE_CS42_7AL_TGACv1_558796_AA1796130,TRIAE_CS42_1DL_TGACv1_061638_AA0200670
GO:0009260	ribonucleotide biosynthetic process	biological_process	3.3157e-05	0.00053193	21	2784	203	74606	TRIAE_CS42_1AL_TGACv1_004040_AA0052320,TRIAE_CS42_6AL_TGACv1_473321_AA1530120,TRIAE_CS42_1BL_TGACv1_031692_AA0118950,TRIAE_CS42_5AL_TGACv1_374789_AA1209000,TRIAE_CS42_6DL_TGACv1_526952_AA1695860,TRIAE_CS42_6BL_TGACv1_499360_AA1579440,TRIAE_CS42_5DL_TGACv1_435540_AA1451810,TRIAE_CS42_1BL_TGACv1_030377_AA0088540,TRIAE_CS42_3DL_TGACv1_249279_AA0843940,TRIAE_CS42_4DS_TGACv1_361731_AA1172190,TRIAE_CS4…
GO:0046390	ribose phosphate biosynthetic process	biological_process	3.3157e-05	0.00053193	21	2784	203	74606	TRIAE_CS42_2BL_TGACv1_130381_AA0409970,TRIAE_CS42_5BL_TGACv1_406155_AA1341460,TRIAE_CS42_3DL_TGACv1_249279_AA0843940,TRIAE_CS42_4DS_TGACv1_361731_AA1172190,TRIAE_CS42_3B_TGACv1_223258_AA0779170,TRIAE_CS42_5DL_TGACv1_435540_AA1451810,TRIAE_CS42_1BL_TGACv1_030377_AA0088540,TRIAE_CS42_6BL_TGACv1_499360_AA1579440,TRIAE_CS42_5AL_TGACv1_374789_AA1209000,TRIAE_CS42_6DL_TGACv1_526952_AA1695860,TRIAE_CS42…
GO:0022891	substrate-specific transmembrane transporter activity	molecular_function	3.3297e-05	0.00053291	70	2784	1222	74606	TRIAE_CS42_5DL_TGACv1_433496_AA1414720,TRIAE_CS42_U_TGACv1_640699_AA2069290,TRIAE_CS42_4BL_TGACv1_321851_AA1066240,TRIAE_CS42_2BL_TGACv1_130381_AA0409970,TRIAE_CS42_3DL_TGACv1_250717_AA0872310,TRIAE_CS42_3B_TGACv1_224031_AA0791230,TRIAE_CS42_7AL_TGACv1_559344_AA1799200,TRIAE_CS42_5DL_TGACv1_436184_AA1459030,TRIAE_CS42_5AL_TGACv1_378731_AA1254390,TRIAE_CS42_1AL_TGACv1_000296_AA0008180,TRIAE_CS42_6…
GO:0006900	membrane budding	biological_process	3.3453e-05	0.00053413	10	2784	65	74606	TRIAE_CS42_4AL_TGACv1_288747_AA0957130,TRIAE_CS42_3DL_TGACv1_250339_AA0866430,TRIAE_CS42_4AS_TGACv1_306421_AA1007900,TRIAE_CS42_3B_TGACv1_220835_AA0720860,TRIAE_CS42_4DS_TGACv1_361471_AA1168550,TRIAE_CS42_4BL_TGACv1_320261_AA1032800,TRIAE_CS42_4DS_TGACv1_362497_AA1180110,TRIAE_CS42_4BS_TGACv1_328452_AA1088030,TRIAE_CS42_5AL_TGACv1_378411_AA1253160,TRIAE_CS42_3AL_TGACv1_194328_AA0631110
GO:0007010	cytoskeleton organization	biological_process	3.597e-05	0.00057296	28	2784	346	74606	TRIAE_CS42_6BS_TGACv1_513186_AA1633440,TRIAE_CS42_1BS_TGACv1_049965_AA0164830,TRIAE_CS42_1AL_TGACv1_000051_AA0001350,TRIAE_CS42_1DL_TGACv1_062210_AA0210520,TRIAE_CS42_3DL_TGACv1_249363_AA0846610,TRIAE_CS42_2AS_TGACv1_113582_AA0358210,TRIAE_CS42_1BL_TGACv1_030590_AA0094940,TRIAE_CS42_5DL_TGACv1_433323_AA1409740,TRIAE_CS42_3AL_TGACv1_194109_AA0626680,TRIAE_CS42_6AS_TGACv1_486373_AA1560720,TRIAE_CS4…
GO:0005662	DNA replication factor A complex	cellular_component	3.6591e-05	0.00058148	3	2784	3	74606	TRIAE_CS42_4BL_TGACv1_321871_AA1066490,TRIAE_CS42_4AS_TGACv1_306214_AA1004350,TRIAE_CS42_4DL_TGACv1_342972_AA1126540
GO:0003872	6-phosphofructokinase activity	molecular_function	3.7919e-05	0.00059782	8	2784	38	74606	TRIAE_CS42_6AL_TGACv1_471645_AA1512290,TRIAE_CS42_7BS_TGACv1_592594_AA1941060,TRIAE_CS42_1AL_TGACv1_000755_AA0018450,TRIAE_CS42_4AL_TGACv1_290300_AA0983760,TRIAE_CS42_7AS_TGACv1_570937_AA1842720,TRIAE_CS42_1DL_TGACv1_063603_AA0229020,TRIAE_CS42_7AS_TGACv1_571836_AA1850200,TRIAE_CS42_7DS_TGACv1_622764_AA2045010
GO:0061615	glycolytic process through fructose-6-phosphate	biological_process	3.7919e-05	0.00059782	8	2784	38	74606	TRIAE_CS42_4AL_TGACv1_290300_AA0983760,TRIAE_CS42_7AS_TGACv1_570937_AA1842720,TRIAE_CS42_1DL_TGACv1_063603_AA0229020,TRIAE_CS42_7DS_TGACv1_622764_AA2045010,TRIAE_CS42_7AS_TGACv1_571836_AA1850200,TRIAE_CS42_6AL_TGACv1_471645_AA1512290,TRIAE_CS42_7BS_TGACv1_592594_AA1941060,TRIAE_CS42_1AL_TGACv1_000755_AA0018450
GO:0000347	THO complex	cellular_component	3.8408e-05	0.00059782	6	2784	21	74606	TRIAE_CS42_3DL_TGACv1_252076_AA0887540,TRIAE_CS42_5AS_TGACv1_393478_AA1272980,TRIAE_CS42_5BS_TGACv1_423792_AA1383390,TRIAE_CS42_3B_TGACv1_224285_AA0794840,TRIAE_CS42_5AL_TGACv1_374196_AA1193370,TRIAE_CS42_5DS_TGACv1_457219_AA1483870
GO:0016719	carotene 7,8-desaturase activity	molecular_function	3.8599e-05	0.00059782	3	2784	3	74606	TRIAE_CS42_2AS_TGACv1_112052_AA0328860,TRIAE_CS42_2BS_TGACv1_145984_AA0451870,TRIAE_CS42_2DS_TGACv1_177352_AA0574250
GO:0052886	9,9'-dicis-carotene:quinone oxidoreductase activity	molecular_function	3.8599e-05	0.00059782	3	2784	3	74606	TRIAE_CS42_2AS_TGACv1_112052_AA0328860,TRIAE_CS42_2BS_TGACv1_145984_AA0451870,TRIAE_CS42_2DS_TGACv1_177352_AA0574250
GO:0052889	9,9'-di-cis-zeta-carotene desaturation to 7,9,7',9'-tetra-cis-lycopene	biological_process	3.8599e-05	0.00059782	3	2784	3	74606	TRIAE_CS42_2AS_TGACv1_112052_AA0328860,TRIAE_CS42_2BS_TGACv1_145984_AA0451870,TRIAE_CS42_2DS_TGACv1_177352_AA0574250
GO:1901175	lycopene metabolic process	biological_process	3.8599e-05	0.00059782	3	2784	3	74606	TRIAE_CS42_2AS_TGACv1_112052_AA0328860,TRIAE_CS42_2DS_TGACv1_177352_AA0574250,TRIAE_CS42_2BS_TGACv1_145984_AA0451870
GO:1901177	lycopene biosynthetic process	biological_process	3.8599e-05	0.00059782	3	2784	3	74606	TRIAE_CS42_2AS_TGACv1_112052_AA0328860,TRIAE_CS42_2DS_TGACv1_177352_AA0574250,TRIAE_CS42_2BS_TGACv1_145984_AA0451870
GO:0032069	regulation of nuclease activity	biological_process	3.8864e-05	0.00059782	3	2784	3	74606	TRIAE_CS42_4AS_TGACv1_306406_AA1007690,TRIAE_CS42_4BL_TGACv1_321702_AA1064290,TRIAE_CS42_4DL_TGACv1_343812_AA1140000
GO:0032074	negative regulation of nuclease activity	biological_process	3.8864e-05	0.00059782	3	2784	3	74606	TRIAE_CS42_4AS_TGACv1_306406_AA1007690,TRIAE_CS42_4BL_TGACv1_321702_AA1064290,TRIAE_CS42_4DL_TGACv1_343812_AA1140000
GO:0060700	regulation of ribonuclease activity	biological_process	3.8864e-05	0.00059782	3	2784	3	74606	TRIAE_CS42_4AS_TGACv1_306406_AA1007690,TRIAE_CS42_4BL_TGACv1_321702_AA1064290,TRIAE_CS42_4DL_TGACv1_343812_AA1140000
GO:0060701	negative regulation of ribonuclease activity	biological_process	3.8864e-05	0.00059782	3	2784	3	74606	TRIAE_CS42_4DL_TGACv1_343812_AA1140000,TRIAE_CS42_4BL_TGACv1_321702_AA1064290,TRIAE_CS42_4AS_TGACv1_306406_AA1007690
GO:1901917	regulation of exoribonuclease activity	biological_process	3.8864e-05	0.00059782	3	2784	3	74606	TRIAE_CS42_4BL_TGACv1_321702_AA1064290,TRIAE_CS42_4AS_TGACv1_306406_AA1007690,TRIAE_CS42_4DL_TGACv1_343812_AA1140000
GO:1901918	negative regulation of exoribonuclease activity	biological_process	3.8864e-05	0.00059782	3	2784	3	74606	TRIAE_CS42_4AS_TGACv1_306406_AA1007690,TRIAE_CS42_4BL_TGACv1_321702_AA1064290,TRIAE_CS42_4DL_TGACv1_343812_AA1140000
GO:0046500	S-adenosylmethionine metabolic process	biological_process	3.9396e-05	0.00060461	6	2784	19	74606	TRIAE_CS42_6DL_TGACv1_526382_AA1681340,TRIAE_CS42_3B_TGACv1_223441_AA0782230,TRIAE_CS42_6AL_TGACv1_475648_AA1536640,TRIAE_CS42_6BL_TGACv1_499577_AA1586520,TRIAE_CS42_3AS_TGACv1_213440_AA0706960,TRIAE_CS42_6BL_TGACv1_500297_AA1602810
GO:0008509	anion transmembrane transporter activity	molecular_function	4.2834e-05	0.00065588	23	2784	263	74606	TRIAE_CS42_3B_TGACv1_223199_AA0777850,TRIAE_CS42_3AL_TGACv1_194874_AA0641130,TRIAE_CS42_4DL_TGACv1_345350_AA1152790,TRIAE_CS42_1DL_TGACv1_062818_AA0220440,TRIAE_CS42_5AL_TGACv1_374188_AA1192880,TRIAE_CS42_3DS_TGACv1_271874_AA0909920,TRIAE_CS42_5DL_TGACv1_432946_AA1395680,TRIAE_CS42_4AS_TGACv1_306930_AA1015160,TRIAE_CS42_5BL_TGACv1_405907_AA1337450,TRIAE_CS42_U_TGACv1_644844_AA2141960,TRIAE_CS42_3…
GO:0098589	membrane region	cellular_component	4.3197e-05	0.00065994	6	2784	22	74606	TRIAE_CS42_7AL_TGACv1_556695_AA1769100,TRIAE_CS42_4DS_TGACv1_362497_AA1180110,TRIAE_CS42_5AL_TGACv1_378411_AA1253160,TRIAE_CS42_4BS_TGACv1_328452_AA1088030,TRIAE_CS42_7DL_TGACv1_602635_AA1963430,TRIAE_CS42_4AL_TGACv1_288747_AA0957130
GO:0010295	(+)-abscisic acid 8'-hydroxylase activity	molecular_function	4.3311e-05	0.00066017	3	2784	3	74606	TRIAE_CS42_5BL_TGACv1_404577_AA1304800,TRIAE_CS42_5AL_TGACv1_374310_AA1196560,TRIAE_CS42_5DL_TGACv1_433651_AA1418390
GO:0004001	adenosine kinase activity	molecular_function	4.3515e-05	0.00066178	3	2784	3	74606	TRIAE_CS42_6BL_TGACv1_499360_AA1579440,TRIAE_CS42_6DL_TGACv1_526952_AA1695860,TRIAE_CS42_6AL_TGACv1_473321_AA1530120
GO:0009670	triose-phosphate:phosphate antiporter activity	molecular_function	4.3901e-05	0.00066615	3	2784	3	74606	TRIAE_CS42_5DL_TGACv1_432946_AA1395680,TRIAE_CS42_5AL_TGACv1_374188_AA1192880,TRIAE_CS42_5BL_TGACv1_405907_AA1337450
GO:0006063	uronic acid metabolic process	biological_process	4.4863e-05	0.00067465	3	2784	3	74606	TRIAE_CS42_2AL_TGACv1_093541_AA0282230,TRIAE_CS42_2BL_TGACv1_131119_AA0422830,TRIAE_CS42_2DL_TGACv1_160680_AA0553060
GO:0019586	galacturonate metabolic process	biological_process	4.4863e-05	0.00067465	3	2784	3	74606	TRIAE_CS42_2DL_TGACv1_160680_AA0553060,TRIAE_CS42_2BL_TGACv1_131119_AA0422830,TRIAE_CS42_2AL_TGACv1_093541_AA0282230
GO:0046396	D-galacturonate metabolic process	biological_process	4.4863e-05	0.00067465	3	2784	3	74606	TRIAE_CS42_2DL_TGACv1_160680_AA0553060,TRIAE_CS42_2AL_TGACv1_093541_AA0282230,TRIAE_CS42_2BL_TGACv1_131119_AA0422830
GO:0047912	galacturonokinase activity	molecular_function	4.4863e-05	0.00067465	3	2784	3	74606	TRIAE_CS42_2DL_TGACv1_160680_AA0553060,TRIAE_CS42_2BL_TGACv1_131119_AA0422830,TRIAE_CS42_2AL_TGACv1_093541_AA0282230
GO:0010176	homogentisate phytyltransferase activity	molecular_function	4.5364e-05	0.00068066	3	2784	3	74606	TRIAE_CS42_7AL_TGACv1_559693_AA1800520,TRIAE_CS42_7DL_TGACv1_604116_AA1994020,TRIAE_CS42_7BL_TGACv1_577849_AA1884560
GO:0008426	protein kinase C inhibitor activity	molecular_function	4.8032e-05	0.00071315	3	2784	3	74606	TRIAE_CS42_4AL_TGACv1_289949_AA0979320,TRIAE_CS42_4BS_TGACv1_330937_AA1109120,TRIAE_CS42_4DS_TGACv1_362253_AA1178260
GO:0033013	tetrapyrrole metabolic process	biological_process	4.8092e-05	0.00071315	18	2784	169	74606	TRIAE_CS42_4AS_TGACv1_306569_AA1010320,TRIAE_CS42_1AL_TGACv1_000695_AA0017180,TRIAE_CS42_2BS_TGACv1_146261_AA0460710,TRIAE_CS42_1BS_TGACv1_050930_AA0176780,TRIAE_CS42_4BL_TGACv1_320729_AA1047290,TRIAE_CS42_3B_TGACv1_224016_AA0791010,TRIAE_CS42_3AS_TGACv1_211390_AA0689620,TRIAE_CS42_2AS_TGACv1_113806_AA0360900,TRIAE_CS42_5DS_TGACv1_458609_AA1494170,TRIAE_CS42_3AL_TGACv1_197079_AA0664730,TRIAE_CS42…
GO:0030371	translation repressor activity	molecular_function	4.8259e-05	0.00071315	3	2784	3	74606	TRIAE_CS42_5AL_TGACv1_377520_AA1247660,TRIAE_CS42_5BL_TGACv1_405701_AA1333330,TRIAE_CS42_U_TGACv1_642463_AA2118090
GO:0031597	cytosolic proteasome complex	cellular_component	4.8259e-05	0.00071315	3	2784	3	74606	TRIAE_CS42_U_TGACv1_642463_AA2118090,TRIAE_CS42_5AL_TGACv1_377520_AA1247660,TRIAE_CS42_5BL_TGACv1_405701_AA1333330
GO:0045182	translation regulator activity	molecular_function	4.8259e-05	0.00071315	3	2784	3	74606	TRIAE_CS42_U_TGACv1_642463_AA2118090,TRIAE_CS42_5BL_TGACv1_405701_AA1333330,TRIAE_CS42_5AL_TGACv1_377520_AA1247660
GO:0071540	eukaryotic translation initiation factor 3 complex, eIF3e	cellular_component	4.8259e-05	0.00071315	3	2784	3	74606	TRIAE_CS42_5AL_TGACv1_377520_AA1247660,TRIAE_CS42_5BL_TGACv1_405701_AA1333330,TRIAE_CS42_U_TGACv1_642463_AA2118090
GO:0004314	[acyl-carrier-protein] S-malonyltransferase activity	molecular_function	4.8484e-05	0.00071315	3	2784	3	74606	TRIAE_CS42_4AS_TGACv1_306673_AA1011900,TRIAE_CS42_4DL_TGACv1_343777_AA1139610,TRIAE_CS42_U_TGACv1_643054_AA2126680
GO:0016419	S-malonyltransferase activity	molecular_function	4.8484e-05	0.00071315	3	2784	3	74606	TRIAE_CS42_U_TGACv1_643054_AA2126680,TRIAE_CS42_4AS_TGACv1_306673_AA1011900,TRIAE_CS42_4DL_TGACv1_343777_AA1139610
GO:0016420	malonyltransferase activity	molecular_function	4.8484e-05	0.00071315	3	2784	3	74606	TRIAE_CS42_U_TGACv1_643054_AA2126680,TRIAE_CS42_4DL_TGACv1_343777_AA1139610,TRIAE_CS42_4AS_TGACv1_306673_AA1011900
GO:0030008	TRAPP complex	cellular_component	5.2755e-05	0.00077428	6	2784	16	74606	TRIAE_CS42_2AS_TGACv1_113808_AA0360930,TRIAE_CS42_2BS_TGACv1_146165_AA0457230,TRIAE_CS42_2AS_TGACv1_113553_AA0357680,TRIAE_CS42_2BS_TGACv1_146389_AA0464090,TRIAE_CS42_5AL_TGACv1_377239_AA1245240,TRIAE_CS42_5BL_TGACv1_407080_AA1353120
GO:0005743	mitochondrial inner membrane	cellular_component	5.4376e-05	0.00079633	26	2784	245	74606	TRIAE_CS42_2AL_TGACv1_095324_AA0309650,TRIAE_CS42_1AL_TGACv1_000051_AA0001340,TRIAE_CS42_5DL_TGACv1_434833_AA1442310,TRIAE_CS42_2DL_TGACv1_158421_AA0518370,TRIAE_CS42_4DL_TGACv1_342742_AA1120750,TRIAE_CS42_6BL_TGACv1_501539_AA1618480,TRIAE_CS42_1AL_TGACv1_002629_AA0043900,TRIAE_CS42_1DL_TGACv1_062210_AA0210500,TRIAE_CS42_4DS_TGACv1_361934_AA1174470,TRIAE_CS42_2AL_TGACv1_094127_AA0292960,TRIAE_CS4…
GO:0006275	regulation of DNA replication	biological_process	5.6239e-05	0.00082182	8	2784	37	74606	TRIAE_CS42_6DL_TGACv1_526389_AA1681790,TRIAE_CS42_4BL_TGACv1_321351_AA1059370,TRIAE_CS42_6BL_TGACv1_500113_AA1599290,TRIAE_CS42_6AL_TGACv1_473573_AA1531820,TRIAE_CS42_U_TGACv1_643385_AA2131440,TRIAE_CS42_2DL_TGACv1_159200_AA0534260,TRIAE_CS42_2BL_TGACv1_131506_AA0428640,TRIAE_CS42_2AL_TGACv1_096359_AA0318830
GO:0046486	glycerolipid metabolic process	biological_process	5.8416e-05	0.00085179	27	2784	360	74606	TRIAE_CS42_6BS_TGACv1_514507_AA1660710,TRIAE_CS42_6DL_TGACv1_527936_AA1710100,TRIAE_CS42_2DS_TGACv1_177763_AA0584180,TRIAE_CS42_U_TGACv1_643011_AA2126070,TRIAE_CS42_5DL_TGACv1_433855_AA1423770,TRIAE_CS42_2BS_TGACv1_146926_AA0475500,TRIAE_CS42_1BL_TGACv1_032207_AA0126810,TRIAE_CS42_4AL_TGACv1_288281_AA0943580,TRIAE_CS42_3DL_TGACv1_254806_AA0896680,TRIAE_CS42_2BS_TGACv1_146181_AA0457580,TRIAE_CS42_…
GO:0016050	vesicle organization	biological_process	5.9399e-05	0.00086424	10	2784	70	74606	TRIAE_CS42_4AL_TGACv1_288747_AA0957130,TRIAE_CS42_3DL_TGACv1_250339_AA0866430,TRIAE_CS42_4AS_TGACv1_306421_AA1007900,TRIAE_CS42_3B_TGACv1_220835_AA0720860,TRIAE_CS42_4DS_TGACv1_361471_AA1168550,TRIAE_CS42_3AL_TGACv1_194328_AA0631110,TRIAE_CS42_4DS_TGACv1_362497_AA1180110,TRIAE_CS42_4BL_TGACv1_320261_AA1032800,TRIAE_CS42_5AL_TGACv1_378411_AA1253160,TRIAE_CS42_4BS_TGACv1_328452_AA1088030
GO:0009250	glucan biosynthetic process	biological_process	6.2336e-05	0.00090501	18	2784	212	74606	TRIAE_CS42_4BS_TGACv1_328010_AA1080930,TRIAE_CS42_7AL_TGACv1_556597_AA1766600,TRIAE_CS42_1BL_TGACv1_031136_AA0108420,TRIAE_CS42_1BL_TGACv1_031712_AA0119450,TRIAE_CS42_2BL_TGACv1_131489_AA0428400,TRIAE_CS42_1DL_TGACv1_062182_AA0210070,TRIAE_CS42_2DL_TGACv1_159587_AA0540290,TRIAE_CS42_2AL_TGACv1_093163_AA0273760,TRIAE_CS42_2BS_TGACv1_147826_AA0487990,TRIAE_CS42_4AL_TGACv1_289959_AA0979560,TRIAE_CS4…
GO:0019318	hexose metabolic process	biological_process	6.265e-05	0.00090761	22	2784	248	74606	TRIAE_CS42_4AS_TGACv1_306645_AA1011430,TRIAE_CS42_1DS_TGACv1_081340_AA0260080,TRIAE_CS42_3AL_TGACv1_196039_AA0656760,TRIAE_CS42_4BL_TGACv1_320480_AA1040880,TRIAE_CS42_6BL_TGACv1_502089_AA1623000,TRIAE_CS42_2AS_TGACv1_112635_AA0342690,TRIAE_CS42_7BS_TGACv1_592259_AA1934400,TRIAE_CS42_2BS_TGACv1_145925_AA0449700,TRIAE_CS42_6AS_TGACv1_487743_AA1572700,TRIAE_CS42_6DS_TGACv1_542766_AA1729850,TRIAE_CS4…
GO:0004222	metalloendopeptidase activity	molecular_function	6.8398e-05	0.00098876	19	2784	197	74606	TRIAE_CS42_3AL_TGACv1_194265_AA0629810,TRIAE_CS42_2DL_TGACv1_162623_AA0563200,TRIAE_CS42_5AS_TGACv1_394409_AA1280200,TRIAE_CS42_3B_TGACv1_220888_AA0722660,TRIAE_CS42_4AS_TGACv1_306710_AA1012280,TRIAE_CS42_3AL_TGACv1_194555_AA0635620,TRIAE_CS42_4DL_TGACv1_345966_AA1154850,TRIAE_CS42_3B_TGACv1_225805_AA0811930,TRIAE_CS42_4AS_TGACv1_306711_AA1012310,TRIAE_CS42_7DL_TGACv1_604164_AA1994640,TRIAE_CS42_…
GO:1901137	carbohydrate derivative biosynthetic process	biological_process	6.9448e-05	0.0010018	48	2784	730	74606	TRIAE_CS42_7BS_TGACv1_592783_AA1944260,TRIAE_CS42_5AL_TGACv1_375327_AA1219960,TRIAE_CS42_1AL_TGACv1_000492_AA0013410,TRIAE_CS42_3AL_TGACv1_194109_AA0626660,TRIAE_CS42_7AL_TGACv1_558796_AA1796130,TRIAE_CS42_5DL_TGACv1_433855_AA1423770,TRIAE_CS42_2AL_TGACv1_095324_AA0309650,TRIAE_CS42_6DL_TGACv1_527865_AA1709380,TRIAE_CS42_6DL_TGACv1_528145_AA1711960,TRIAE_CS42_1DL_TGACv1_061176_AA0187850,TRIAE_CS4…
GO:0034051	negative regulation of plant-type hypersensitive response	biological_process	7.1387e-05	0.0010275	3	2784	3	74606	TRIAE_CS42_1DL_TGACv1_062362_AA0213270,TRIAE_CS42_1AL_TGACv1_002853_AA0045580,TRIAE_CS42_1BL_TGACv1_030567_AA0094200
GO:0033692	cellular polysaccharide biosynthetic process	biological_process	7.3021e-05	0.0010488	21	2784	263	74606	TRIAE_CS42_2BS_TGACv1_147826_AA0487990,TRIAE_CS42_2AL_TGACv1_093163_AA0273760,TRIAE_CS42_4AL_TGACv1_289959_AA0979560,TRIAE_CS42_2DS_TGACv1_180213_AA0610440,TRIAE_CS42_1DL_TGACv1_062182_AA0210070,TRIAE_CS42_2BL_TGACv1_131489_AA0428400,TRIAE_CS42_2DL_TGACv1_159587_AA0540290,TRIAE_CS42_2BL_TGACv1_130497_AA0412430,TRIAE_CS42_1BL_TGACv1_031712_AA0119450,TRIAE_CS42_4BS_TGACv1_328010_AA1080930,TRIAE_CS4…
GO:0005657	replication fork	cellular_component	7.7213e-05	0.0011067	5	2784	14	74606	TRIAE_CS42_4BL_TGACv1_321871_AA1066490,TRIAE_CS42_3B_TGACv1_221965_AA0753990,TRIAE_CS42_4AS_TGACv1_306214_AA1004350,TRIAE_CS42_1DL_TGACv1_061346_AA0192790,TRIAE_CS42_4DL_TGACv1_342972_AA1126540
GO:0009086	methionine biosynthetic process	biological_process	8.0535e-05	0.0011518	8	2784	40	74606	TRIAE_CS42_5AS_TGACv1_393328_AA1271350,TRIAE_CS42_5DS_TGACv1_456564_AA1474130,TRIAE_CS42_5BS_TGACv1_423584_AA1379990,TRIAE_CS42_4DS_TGACv1_361983_AA1175310,TRIAE_CS42_4DL_TGACv1_343385_AA1133850,TRIAE_CS42_4AL_TGACv1_290117_AA0981910,TRIAE_CS42_4BS_TGACv1_330819_AA1108930,TRIAE_CS42_7DS_TGACv1_624143_AA2059180
GO:0007264	small GTPase mediated signal transduction	biological_process	8.1363e-05	0.0011612	13	2784	100	74606	TRIAE_CS42_2DL_TGACv1_158207_AA0512370,TRIAE_CS42_U_TGACv1_644112_AA2137260,TRIAE_CS42_5DL_TGACv1_434384_AA1435060,TRIAE_CS42_5BL_TGACv1_404235_AA1291560,TRIAE_CS42_1BL_TGACv1_030978_AA0104970,TRIAE_CS42_5AL_TGACv1_376685_AA1239940,TRIAE_CS42_4BL_TGACv1_321429_AA1060300,TRIAE_CS42_5BL_TGACv1_404823_AA1311860,TRIAE_CS42_1AL_TGACv1_001070_AA0024450,TRIAE_CS42_1DL_TGACv1_062495_AA0215330,TRIAE_CS42_…
GO:0006164	purine nucleotide biosynthetic process	biological_process	8.3494e-05	0.0011891	19	2784	183	74606	TRIAE_CS42_5BL_TGACv1_406155_AA1341460,TRIAE_CS42_2BL_TGACv1_130381_AA0409970,TRIAE_CS42_4DS_TGACv1_361731_AA1172190,TRIAE_CS42_1BL_TGACv1_030377_AA0088540,TRIAE_CS42_5DL_TGACv1_435540_AA1451810,TRIAE_CS42_6BL_TGACv1_499360_AA1579440,TRIAE_CS42_6DL_TGACv1_526952_AA1695860,TRIAE_CS42_5AL_TGACv1_374789_AA1209000,TRIAE_CS42_6AL_TGACv1_473321_AA1530120,TRIAE_CS42_1BL_TGACv1_031692_AA0118950,TRIAE_CS4…
GO:0006721	terpenoid metabolic process	biological_process	8.4019e-05	0.001194	12	2784	92	74606	TRIAE_CS42_2BS_TGACv1_145984_AA0451870,TRIAE_CS42_5DL_TGACv1_434775_AA1441440,TRIAE_CS42_2DS_TGACv1_177352_AA0574250,TRIAE_CS42_4AL_TGACv1_289623_AA0974220,TRIAE_CS42_6DL_TGACv1_527093_AA1698360,TRIAE_CS42_3AS_TGACv1_210696_AA0677310,TRIAE_CS42_2AS_TGACv1_112052_AA0328860,TRIAE_CS42_4AL_TGACv1_289727_AA0976030,TRIAE_CS42_4BS_TGACv1_329699_AA1103360,TRIAE_CS42_4DS_TGACv1_361391_AA1166860,TRIAE_CS4…
GO:0006820	anion transport	biological_process	8.6563e-05	0.0012276	31	2784	422	74606	TRIAE_CS42_4BL_TGACv1_321851_AA1066240,TRIAE_CS42_3B_TGACv1_225155_AA0805550,TRIAE_CS42_3DS_TGACv1_272832_AA0925630,TRIAE_CS42_6AL_TGACv1_470942_AA1499130,TRIAE_CS42_7BL_TGACv1_577333_AA1872500,TRIAE_CS42_4DL_TGACv1_342952_AA1125960,TRIAE_CS42_4DS_TGACv1_361391_AA1166860,TRIAE_CS42_2BS_TGACv1_146815_AA0473320,TRIAE_CS42_4AS_TGACv1_306580_AA1010500,TRIAE_CS42_3B_TGACv1_222757_AA0770040,TRIAE_CS42_…
GO:0051536	iron-sulfur cluster binding	molecular_function	9.1577e-05	0.0012932	24	2784	273	74606	TRIAE_CS42_1AL_TGACv1_000132_AA0004290,TRIAE_CS42_7DL_TGACv1_605269_AA2005660,TRIAE_CS42_5DL_TGACv1_433951_AA1426100,TRIAE_CS42_7BL_TGACv1_577913_AA1885930,TRIAE_CS42_4DL_TGACv1_343749_AA1139150,TRIAE_CS42_2DL_TGACv1_161360_AA0558180,TRIAE_CS42_3AL_TGACv1_197079_AA0664730,TRIAE_CS42_5BL_TGACv1_404132_AA1285870,TRIAE_CS42_2BL_TGACv1_129976_AA0400820,TRIAE_CS42_4DS_TGACv1_361934_AA1174470,TRIAE_CS4…
GO:0051540	metal cluster binding	molecular_function	9.1577e-05	0.0012932	24	2784	273	74606	TRIAE_CS42_3AL_TGACv1_193640_AA0616020,AIG90478,TRIAE_CS42_5BL_TGACv1_404132_AA1285870,TRIAE_CS42_2AL_TGACv1_094809_AA0303420,TRIAE_CS42_4DS_TGACv1_361934_AA1174470,TRIAE_CS42_2BL_TGACv1_129976_AA0400820,TRIAE_CS42_7BS_TGACv1_592934_AA1946410,TRIAE_CS42_5AL_TGACv1_377674_AA1248690,TRIAE_CS42_5BL_TGACv1_404354_AA1296670,TRIAE_CS42_1AL_TGACv1_001652_AA0033600,TRIAE_CS42_6BL_TGACv1_501539_AA1618480,…
GO:0007076	mitotic chromosome condensation	biological_process	9.2291e-05	0.0013006	5	2784	16	74606	TRIAE_CS42_6AL_TGACv1_473440_AA1531120,TRIAE_CS42_3B_TGACv1_226023_AA0813450,TRIAE_CS42_3AL_TGACv1_195859_AA0654910,TRIAE_CS42_2BS_TGACv1_146093_AA0455120,TRIAE_CS42_2AL_TGACv1_098666_AA0326490
GO:0030140	trans-Golgi network transport vesicle	cellular_component	9.2704e-05	0.0013037	6	2784	25	74606	TRIAE_CS42_7AL_TGACv1_556695_AA1769100,TRIAE_CS42_5AL_TGACv1_378411_AA1253160,TRIAE_CS42_4BS_TGACv1_328452_AA1088030,TRIAE_CS42_4DS_TGACv1_362497_AA1180110,TRIAE_CS42_4AL_TGACv1_288747_AA0957130,TRIAE_CS42_7DL_TGACv1_602635_AA1963430
GO:0006290	pyrimidine dimer repair	biological_process	9.7372e-05	0.0013665	3	2784	4	74606	TRIAE_CS42_7DS_TGACv1_622043_AA2031500,TRIAE_CS42_1AS_TGACv1_019932_AA0072990,TRIAE_CS42_7BS_TGACv1_592026_AA1928570
GO:0006000	fructose metabolic process	biological_process	9.9732e-05	0.0013967	4	2784	9	74606	TRIAE_CS42_4BL_TGACv1_320480_AA1040880,TRIAE_CS42_4DL_TGACv1_343659_AA1137850,TRIAE_CS42_7BS_TGACv1_592259_AA1934400,TRIAE_CS42_4AS_TGACv1_306645_AA1011430
GO:0003743	translation initiation factor activity	molecular_function	0.00010732	0.0014999	17	2784	159	74606	TRIAE_CS42_1BL_TGACv1_031553_AA0115960,TRIAE_CS42_2BS_TGACv1_147477_AA0483610,TRIAE_CS42_4DS_TGACv1_362664_AA1181310,TRIAE_CS42_5AL_TGACv1_374249_AA1195140,TRIAE_CS42_5DL_TGACv1_435150_AA1446750,TRIAE_CS42_6DS_TGACv1_543898_AA1745090,TRIAE_CS42_5BL_TGACv1_405701_AA1333330,TRIAE_CS42_6BL_TGACv1_502287_AA1624100,TRIAE_CS42_6AL_TGACv1_472657_AA1524540,TRIAE_CS42_6AS_TGACv1_486894_AA1566280,TRIAE_CS4…
GO:0006021	inositol biosynthetic process	biological_process	0.00010838	0.0015115	4	2784	8	74606	TRIAE_CS42_4AS_TGACv1_307361_AA1019860,TRIAE_CS42_4BL_TGACv1_320456_AA1039910,TRIAE_CS42_4DL_TGACv1_342557_AA1116570,TRIAE_CS42_4AL_TGACv1_288528_AA0951160
GO:0008320	protein transmembrane transporter activity	molecular_function	0.00011518	0.0015996	6	2784	19	74606	TRIAE_CS42_4AS_TGACv1_307078_AA1016740,TRIAE_CS42_6AS_TGACv1_486953_AA1566790,TRIAE_CS42_4DL_TGACv1_343137_AA1130350,TRIAE_CS42_6DS_TGACv1_542697_AA1728230,TRIAE_CS42_4BL_TGACv1_321242_AA1057770,TRIAE_CS42_6BS_TGACv1_514140_AA1655890
GO:0022884	macromolecule transmembrane transporter activity	molecular_function	0.00011518	0.0015996	6	2784	19	74606	TRIAE_CS42_6DS_TGACv1_542697_AA1728230,TRIAE_CS42_4DL_TGACv1_343137_AA1130350,TRIAE_CS42_6BS_TGACv1_514140_AA1655890,TRIAE_CS42_4BL_TGACv1_321242_AA1057770,TRIAE_CS42_4AS_TGACv1_307078_AA1016740,TRIAE_CS42_6AS_TGACv1_486953_AA1566790
GO:0070006	metalloaminopeptidase activity	molecular_function	0.0001159	0.0016064	7	2784	32	74606	TRIAE_CS42_1DL_TGACv1_061968_AA0206620,TRIAE_CS42_1AL_TGACv1_000625_AA0016150,TRIAE_CS42_6AL_TGACv1_471730_AA1513500,TRIAE_CS42_6DL_TGACv1_528468_AA1714320,TRIAE_CS42_1BL_TGACv1_032431_AA0129810,TRIAE_CS42_6AL_TGACv1_471981_AA1516510,TRIAE_CS42_4DL_TGACv1_342605_AA1117760
GO:0010143	cutin biosynthetic process	biological_process	0.00012136	0.0016786	4	2784	9	74606	TRIAE_CS42_1DL_TGACv1_061584_AA0199150,TRIAE_CS42_1AL_TGACv1_002304_AA0040720,TRIAE_CS42_1AS_TGACv1_019494_AA0067320,TRIAE_CS42_1BS_TGACv1_050462_AA0172420
GO:0016787	hydrolase activity	molecular_function	0.00012347	0.0017042	377	2784	8907	74606	TRIAE_CS42_3AL_TGACv1_194800_AA0639720,TRIAE_CS42_6AL_TGACv1_472261_AA1520090,TRIAE_CS42_1AL_TGACv1_004538_AA0053800,TRIAE_CS42_3AL_TGACv1_194964_AA0642840,TRIAE_CS42_2AL_TGACv1_094077_AA0292200,TRIAE_CS42_2DL_TGACv1_158777_AA0526010,TRIAE_CS42_5BL_TGACv1_407995_AA1360840,TRIAE_CS42_6DL_TGACv1_526316_AA1679330,TRIAE_CS42_1BL_TGACv1_032711_AA0133260,TRIAE_CS42_U_TGACv1_644185_AA2137880,TRIAE_CS42_…
GO:0022892	substrate-specific transporter activity	molecular_function	0.00012501	0.0017219	74	2784	1377	74606	TRIAE_CS42_1AL_TGACv1_000051_AA0001340,TRIAE_CS42_3AL_TGACv1_195562_AA0651220,TRIAE_CS42_1AL_TGACv1_002629_AA0043900,TRIAE_CS42_2AL_TGACv1_098072_AA0325680,TRIAE_CS42_7AL_TGACv1_558294_AA1792080,TRIAE_CS42_3AL_TGACv1_194690_AA0637900,TRIAE_CS42_6AS_TGACv1_486953_AA1566790,TRIAE_CS42_1AL_TGACv1_001462_AA0030900,TRIAE_CS42_3DL_TGACv1_249692_AA0854470,TRIAE_CS42_3DL_TGACv1_252453_AA0890080,TRIAE_CS4…
GO:0000271	polysaccharide biosynthetic process	biological_process	0.00012824	0.0017628	23	2784	311	74606	TRIAE_CS42_5DL_TGACv1_433855_AA1423770,TRIAE_CS42_2BL_TGACv1_131614_AA0429850,TRIAE_CS42_2AL_TGACv1_093044_AA0270150,TRIAE_CS42_2DL_TGACv1_158951_AA0529400,TRIAE_CS42_4BS_TGACv1_329796_AA1104090,TRIAE_CS42_1BL_TGACv1_030553_AA0093880,TRIAE_CS42_1AL_TGACv1_000384_AA0010710,TRIAE_CS42_2AS_TGACv1_113522_AA0357250,TRIAE_CS42_4DS_TGACv1_361657_AA1171120,TRIAE_CS42_5DL_TGACv1_435303_AA1448600,TRIAE_CS4…
GO:0009165	nucleotide biosynthetic process	biological_process	0.00013252	0.001818	25	2784	293	74606	TRIAE_CS42_2DL_TGACv1_158421_AA0518370,TRIAE_CS42_1AL_TGACv1_000051_AA0001340,TRIAE_CS42_2AL_TGACv1_095324_AA0309650,TRIAE_CS42_1AL_TGACv1_002629_AA0043900,TRIAE_CS42_7AS_TGACv1_569826_AA1824850,TRIAE_CS42_1DL_TGACv1_062210_AA0210500,TRIAE_CS42_1DL_TGACv1_061176_AA0187850,TRIAE_CS42_1AL_TGACv1_000492_AA0013410,TRIAE_CS42_3AL_TGACv1_194109_AA0626660,TRIAE_CS42_5DL_TGACv1_433626_AA1417990,TRIAE_CS4…
GO:0005976	polysaccharide metabolic process	biological_process	0.00013893	0.0019021	43	2784	689	74606	TRIAE_CS42_2DL_TGACv1_158951_AA0529400,TRIAE_CS42_2DS_TGACv1_177436_AA0577070,TRIAE_CS42_2AS_TGACv1_113522_AA0357250,TRIAE_CS42_2AS_TGACv1_112747_AA0344470,TRIAE_CS42_4BS_TGACv1_329796_AA1104090,TRIAE_CS42_1AL_TGACv1_000384_AA0010710,TRIAE_CS42_2AS_TGACv1_116387_AA0373890,TRIAE_CS42_4DS_TGACv1_361657_AA1171120,TRIAE_CS42_5DL_TGACv1_435303_AA1448600,TRIAE_CS42_6AL_TGACv1_472261_AA1520090,TRIAE_CS4…
GO:0009501	amyloplast	cellular_component	0.00014022	0.0019158	6	2784	26	74606	TRIAE_CS42_2BL_TGACv1_131614_AA0429850,TRIAE_CS42_2AL_TGACv1_093163_AA0273760,TRIAE_CS42_1BL_TGACv1_031136_AA0108420,TRIAE_CS42_1AL_TGACv1_000384_AA0010710,TRIAE_CS42_1BL_TGACv1_030553_AA0093880,TRIAE_CS42_1DL_TGACv1_062182_AA0210070
GO:0006575	cellular modified amino acid metabolic process	biological_process	0.00014308	0.0019509	16	2784	151	74606	TRIAE_CS42_5BL_TGACv1_406345_AA1344380,TRIAE_CS42_2DL_TGACv1_159916_AA0544360,TRIAE_CS42_5AL_TGACv1_374680_AA1206310,TRIAE_CS42_2AL_TGACv1_094077_AA0292210,TRIAE_CS42_2AL_TGACv1_094486_AA0298610,TRIAE_CS42_6BL_TGACv1_500297_AA1602810,TRIAE_CS42_6DL_TGACv1_526382_AA1681340,TRIAE_CS42_6BL_TGACv1_499577_AA1586520,TRIAE_CS42_6AL_TGACv1_475648_AA1536640,TRIAE_CS42_3AS_TGACv1_213440_AA0706960,TRIAE_CS4…
GO:0009142	nucleoside triphosphate biosynthetic process	biological_process	0.00014562	0.0019774	15	2784	125	74606	TRIAE_CS42_3AL_TGACv1_194109_AA0626660,TRIAE_CS42_1AL_TGACv1_004040_AA0052320,TRIAE_CS42_1AL_TGACv1_000492_AA0013410,TRIAE_CS42_1BL_TGACv1_031692_AA0118950,TRIAE_CS42_1DL_TGACv1_062210_AA0210500,TRIAE_CS42_1DL_TGACv1_061176_AA0187850,TRIAE_CS42_2BL_TGACv1_130381_AA0409970,TRIAE_CS42_1AL_TGACv1_002629_AA0043900,TRIAE_CS42_4DS_TGACv1_361731_AA1172190,TRIAE_CS42_3DL_TGACv1_249279_AA0843940,TRIAE_CS4…
GO:0009201	ribonucleoside triphosphate biosynthetic process	biological_process	0.00014562	0.0019774	15	2784	125	74606	TRIAE_CS42_1AL_TGACv1_000051_AA0001340,TRIAE_CS42_2DL_TGACv1_158421_AA0518370,TRIAE_CS42_1BL_TGACv1_030377_AA0088540,TRIAE_CS42_2AL_TGACv1_095324_AA0309650,TRIAE_CS42_3B_TGACv1_223258_AA0779170,TRIAE_CS42_4DS_TGACv1_361731_AA1172190,TRIAE_CS42_3DL_TGACv1_249279_AA0843940,TRIAE_CS42_1AL_TGACv1_002629_AA0043900,TRIAE_CS42_2BL_TGACv1_130381_AA0409970,TRIAE_CS42_1DL_TGACv1_061176_AA0187850,TRIAE_CS42…
GO:0006413	translational initiation	biological_process	0.0001483	0.0020079	17	2784	164	74606	TRIAE_CS42_4BL_TGACv1_320636_AA1045250,TRIAE_CS42_6AS_TGACv1_486894_AA1566280,TRIAE_CS42_6AL_TGACv1_472657_AA1524540,TRIAE_CS42_6BL_TGACv1_502287_AA1624100,TRIAE_CS42_5BL_TGACv1_405701_AA1333330,TRIAE_CS42_5DL_TGACv1_435150_AA1446750,TRIAE_CS42_6DS_TGACv1_543898_AA1745090,TRIAE_CS42_2BS_TGACv1_147477_AA0483610,TRIAE_CS42_5AL_TGACv1_374249_AA1195140,TRIAE_CS42_4DS_TGACv1_362664_AA1181310,TRIAE_CS4…
GO:0004617	phosphoglycerate dehydrogenase activity	molecular_function	0.00014846	0.0020079	4	2784	9	74606	TRIAE_CS42_2BL_TGACv1_130544_AA0413270,TRIAE_CS42_2DL_TGACv1_160628_AA0552420,TRIAE_CS42_7BL_TGACv1_580117_AA1912080,TRIAE_CS42_U_TGACv1_641020_AA2082360
GO:0009152	purine ribonucleotide biosynthetic process	biological_process	0.00015227	0.0020553	18	2784	175	74606	TRIAE_CS42_1AL_TGACv1_000492_AA0013410,TRIAE_CS42_2AL_TGACv1_095324_AA0309650,TRIAE_CS42_2DL_TGACv1_158421_AA0518370,TRIAE_CS42_1AL_TGACv1_000051_AA0001340,TRIAE_CS42_1DL_TGACv1_062210_AA0210500,TRIAE_CS42_1DL_TGACv1_061176_AA0187850,TRIAE_CS42_1AL_TGACv1_002629_AA0043900,TRIAE_CS42_6DL_TGACv1_526952_AA1695860,TRIAE_CS42_5AL_TGACv1_374789_AA1209000,TRIAE_CS42_1AL_TGACv1_004040_AA0052320,TRIAE_CS4…
GO:1901293	nucleoside phosphate biosynthetic process	biological_process	0.00015386	0.0020724	25	2784	296	74606	TRIAE_CS42_7BS_TGACv1_593606_AA1952920,TRIAE_CS42_2BL_TGACv1_130381_AA0409970,TRIAE_CS42_5BL_TGACv1_406155_AA1341460,TRIAE_CS42_5DL_TGACv1_435540_AA1451810,TRIAE_CS42_1BL_TGACv1_030377_AA0088540,TRIAE_CS42_4DS_TGACv1_361731_AA1172190,TRIAE_CS42_3DL_TGACv1_249279_AA0843940,TRIAE_CS42_3B_TGACv1_223258_AA0779170,TRIAE_CS42_6BL_TGACv1_499360_AA1579440,TRIAE_CS42_1AL_TGACv1_004040_AA0052320,TRIAE_CS42…
GO:0016830	carbon-carbon lyase activity	molecular_function	0.00015415	0.0020724	25	2784	296	74606	TRIAE_CS42_4AS_TGACv1_306772_AA1013210,TRIAE_CS42_3B_TGACv1_221609_AA0745810,TRIAE_CS42_3B_TGACv1_222610_AA0767770,TRIAE_CS42_3DL_TGACv1_250475_AA0868810,TRIAE_CS42_2DL_TGACv1_158004_AA0505620,TRIAE_CS42_7AS_TGACv1_571185_AA1845550,TRIAE_CS42_7BL_TGACv1_577241_AA1869810,TRIAE_CS42_7AL_TGACv1_556869_AA1772530,TRIAE_CS42_3AS_TGACv1_211026_AA0683390,TRIAE_CS42_7DS_TGACv1_622043_AA2031500,TRIAE_CS42_…
GO:0034641	cellular nitrogen compound metabolic process	biological_process	0.00016183	0.0021714	496	2784	11327	74606	TRIAE_CS42_2BL_TGACv1_129349_AA0379700,TRIAE_CS42_1BL_TGACv1_033273_AA0138330,TRIAE_CS42_3DL_TGACv1_252375_AA0889690,TRIAE_CS42_2AS_TGACv1_112391_AA0337130,TRIAE_CS42_7AS_TGACv1_571632_AA1848990,TRIAE_CS42_1AL_TGACv1_000051_AA0001340,TRIAE_CS42_6AL_TGACv1_473573_AA1531820,TRIAE_CS42_3AS_TGACv1_211390_AA0689620,TRIAE_CS42_2AL_TGACv1_095448_AA0310850,TRIAE_CS42_2DL_TGACv1_161360_AA0558180,TRIAE_CS4…
GO:0030136	clathrin-coated vesicle	cellular_component	0.00016295	0.002182	9	2784	62	74606	TRIAE_CS42_7DL_TGACv1_602635_AA1963430,TRIAE_CS42_4DS_TGACv1_362497_AA1180110,TRIAE_CS42_5AL_TGACv1_378411_AA1253160,TRIAE_CS42_4BS_TGACv1_328452_AA1088030,TRIAE_CS42_3AL_TGACv1_194328_AA0631110,TRIAE_CS42_4AL_TGACv1_288747_AA0957130,TRIAE_CS42_3DL_TGACv1_250339_AA0866430,TRIAE_CS42_7AL_TGACv1_556695_AA1769100,TRIAE_CS42_3B_TGACv1_220835_AA0720860
GO:0006457	protein folding	biological_process	0.00016508	0.0022061	26	2784	314	74606	TRIAE_CS42_5BL_TGACv1_405168_AA1321480,TRIAE_CS42_5DS_TGACv1_456910_AA1479880,TRIAE_CS42_5AS_TGACv1_393346_AA1271570,TRIAE_CS42_4DL_TGACv1_344626_AA1148580,TRIAE_CS42_U_TGACv1_641245_AA2089540,TRIAE_CS42_1AL_TGACv1_000591_AA0015400,TRIAE_CS42_3DS_TGACv1_272144_AA0915590,TRIAE_CS42_3B_TGACv1_222069_AA0756660,TRIAE_CS42_6AS_TGACv1_485286_AA1542400,TRIAE_CS42_7DS_TGACv1_624688_AA2062750,TRIAE_CS42_6…
GO:0022406	membrane docking	biological_process	0.00016655	0.0022195	9	2784	60	74606	TRIAE_CS42_6AL_TGACv1_471366_AA1507720,TRIAE_CS42_5AS_TGACv1_394157_AA1278470,TRIAE_CS42_5AS_TGACv1_394157_AA1278420,TRIAE_CS42_5DS_TGACv1_456933_AA1479990,TRIAE_CS42_6BL_TGACv1_500073_AA1598240,TRIAE_CS42_6BL_TGACv1_499660_AA1588490,TRIAE_CS42_5BS_TGACv1_424367_AA1389100,TRIAE_CS42_6DL_TGACv1_526657_AA1689120,TRIAE_CS42_6AS_TGACv1_485668_AA1549820
GO:0004366	glycerol-3-phosphate O-acyltransferase activity	molecular_function	0.00016674	0.0022195	3	2784	4	74606	TRIAE_CS42_1BL_TGACv1_030666_AA0097340,TRIAE_CS42_1AL_TGACv1_003920_AA0051930,TRIAE_CS42_1DL_TGACv1_063673_AA0229730
GO:0046246	terpene biosynthetic process	biological_process	0.00016959	0.0022529	4	2784	9	74606	TRIAE_CS42_2BS_TGACv1_146261_AA0460710,TRIAE_CS42_2AS_TGACv1_112052_AA0328860,TRIAE_CS42_2BS_TGACv1_145984_AA0451870,TRIAE_CS42_2DS_TGACv1_177352_AA0574250
GO:0010354	homogentisate prenyltransferase activity	molecular_function	0.00017345	0.0022996	3	2784	4	74606	TRIAE_CS42_7AL_TGACv1_559693_AA1800520,TRIAE_CS42_7BL_TGACv1_577849_AA1884560,TRIAE_CS42_7DL_TGACv1_604116_AA1994020
GO:0016741	transferase activity, transferring one-carbon groups	molecular_function	0.00017977	0.0023788	57	2784	957	74606	TRIAE_CS42_1AL_TGACv1_000238_AA0006990,TRIAE_CS42_2AL_TGACv1_094127_AA0292960,TRIAE_CS42_1BL_TGACv1_032207_AA0126810,TRIAE_CS42_5AS_TGACv1_393543_AA1273700,TRIAE_CS42_5AL_TGACv1_376960_AA1242750,TRIAE_CS42_1BL_TGACv1_033523_AA0140110,TRIAE_CS42_3AL_TGACv1_199219_AA0669580,TRIAE_CS42_3DL_TGACv1_250756_AA0872660,TRIAE_CS42_4BL_TGACv1_320400_AA1037850,TRIAE_CS42_6AS_TGACv1_485618_AA1548920,TRIAE_CS4…
GO:0016122	xanthophyll metabolic process	biological_process	0.00018112	0.0023919	5	2784	16	74606	TRIAE_CS42_4AL_TGACv1_289623_AA0974220,TRIAE_CS42_4DS_TGACv1_361391_AA1166860,TRIAE_CS42_4BS_TGACv1_329699_AA1103360,TRIAE_CS42_3AS_TGACv1_210696_AA0677310,TRIAE_CS42_2BS_TGACv1_146261_AA0460710
GO:0032879	regulation of localization	biological_process	0.00018938	0.0024961	10	2784	74	74606	TRIAE_CS42_3DL_TGACv1_250988_AA0875910,TRIAE_CS42_3DL_TGACv1_249213_AA0841560,TRIAE_CS42_3B_TGACv1_222072_AA0756730,TRIAE_CS42_U_TGACv1_640854_AA2077410,TRIAE_CS42_4DL_TGACv1_342367_AA1111630,TRIAE_CS42_7DS_TGACv1_623153_AA2050180,TRIAE_CS42_7AL_TGACv1_556796_AA1770880,TRIAE_CS42_7BS_TGACv1_591976_AA1927160,TRIAE_CS42_4AS_TGACv1_307317_AA1019370,TRIAE_CS42_3AL_TGACv1_197715_AA0667040
GO:0070283	radical SAM enzyme activity	molecular_function	0.00019076	0.0025094	4	2784	9	74606	TRIAE_CS42_1DL_TGACv1_061125_AA0186220,TRIAE_CS42_7BS_TGACv1_592934_AA1946410,TRIAE_CS42_1BL_TGACv1_030654_AA0097000,TRIAE_CS42_1AL_TGACv1_000132_AA0004290
GO:0000062	fatty-acyl-CoA binding	molecular_function	0.00019544	0.0025659	5	2784	14	74606	TRIAE_CS42_7DS_TGACv1_624687_AA2062720,TRIAE_CS42_4AL_TGACv1_291220_AA0993030,TRIAE_CS42_5DL_TGACv1_433907_AA1425020,TRIAE_CS42_7AS_TGACv1_571173_AA1845420,TRIAE_CS42_4AL_TGACv1_291921_AA0997070
GO:2000012	regulation of auxin polar transport	biological_process	0.00019814	0.0025962	5	2784	15	74606	TRIAE_CS42_7BS_TGACv1_591976_AA1927160,TRIAE_CS42_U_TGACv1_640854_AA2077410,TRIAE_CS42_4DL_TGACv1_342367_AA1111630,TRIAE_CS42_7DS_TGACv1_623153_AA2050180,TRIAE_CS42_4AS_TGACv1_307317_AA1019370
GO:0006541	glutamine metabolic process	biological_process	0.00020398	0.0026676	8	2784	49	74606	TRIAE_CS42_3B_TGACv1_223258_AA0779170,TRIAE_CS42_4AS_TGACv1_306772_AA1013210,TRIAE_CS42_3DL_TGACv1_249279_AA0843940,TRIAE_CS42_4AS_TGACv1_307728_AA1023060,TRIAE_CS42_6DL_TGACv1_527226_AA1700820,TRIAE_CS42_4DL_TGACv1_343985_AA1142210,TRIAE_CS42_6BL_TGACv1_500652_AA1608010,TRIAE_CS42_3AL_TGACv1_194109_AA0626660
GO:0006537	glutamate biosynthetic process	biological_process	0.00021437	0.0027981	3	2784	6	74606	TRIAE_CS42_3B_TGACv1_220588_AA0709800,TRIAE_CS42_3AL_TGACv1_193640_AA0616020,TRIAE_CS42_U_TGACv1_654540_AA2150720
GO:0042439	ethanolamine-containing compound metabolic process	biological_process	0.0002306	0.0029982	8	2784	55	74606	TRIAE_CS42_1DL_TGACv1_063094_AA0223830,TRIAE_CS42_3AL_TGACv1_196405_AA0660080,TRIAE_CS42_1DL_TGACv1_062419_AA0214280,TRIAE_CS42_1AL_TGACv1_000734_AA0018090,TRIAE_CS42_3B_TGACv1_222617_AA0767980,TRIAE_CS42_3DL_TGACv1_254806_AA0896680,TRIAE_CS42_1BL_TGACv1_032207_AA0126810,TRIAE_CS42_3B_TGACv1_221027_AA0727340
GO:0046470	phosphatidylcholine metabolic process	biological_process	0.0002306	0.0029982	8	2784	55	74606	TRIAE_CS42_3B_TGACv1_222617_AA0767980,TRIAE_CS42_1AL_TGACv1_000734_AA0018090,TRIAE_CS42_1DL_TGACv1_062419_AA0214280,TRIAE_CS42_3AL_TGACv1_196405_AA0660080,TRIAE_CS42_1DL_TGACv1_063094_AA0223830,TRIAE_CS42_3B_TGACv1_221027_AA0727340,TRIAE_CS42_1BL_TGACv1_032207_AA0126810,TRIAE_CS42_3DL_TGACv1_254806_AA0896680
GO:0000796	condensin complex	cellular_component	0.00023638	0.0030675	4	2784	10	74606	TRIAE_CS42_2AL_TGACv1_098666_AA0326490,TRIAE_CS42_3AL_TGACv1_195859_AA0654910,TRIAE_CS42_3B_TGACv1_226023_AA0813450,TRIAE_CS42_6AL_TGACv1_473440_AA1531120
GO:0015075	ion transmembrane transporter activity	molecular_function	0.0002435	0.0031538	63	2784	1151	74606	TRIAE_CS42_7AL_TGACv1_559344_AA1799200,TRIAE_CS42_1AL_TGACv1_004040_AA0052320,TRIAE_CS42_4AS_TGACv1_306580_AA1010500,TRIAE_CS42_5DL_TGACv1_436184_AA1459030,TRIAE_CS42_4DL_TGACv1_343039_AA1128130,TRIAE_CS42_1AL_TGACv1_000296_AA0008180,TRIAE_CS42_5AL_TGACv1_378731_AA1254390,TRIAE_CS42_4AL_TGACv1_288269_AA0942920,TRIAE_CS42_2BL_TGACv1_129973_AA0400750,TRIAE_CS42_6DS_TGACv1_542944_AA1733060,TRIAE_CS4…
GO:0009070	serine family amino acid biosynthetic process	biological_process	0.00025114	0.0032465	10	2784	72	74606	TRIAE_CS42_3AS_TGACv1_211963_AA0696070,TRIAE_CS42_U_TGACv1_641020_AA2082360,TRIAE_CS42_4DS_TGACv1_362836_AA1182360,TRIAE_CS42_2AL_TGACv1_094077_AA0292210,TRIAE_CS42_2BL_TGACv1_129567_AA0388870,TRIAE_CS42_2BL_TGACv1_130544_AA0413270,TRIAE_CS42_2DL_TGACv1_159916_AA0544360,TRIAE_CS42_7BL_TGACv1_580117_AA1912080,TRIAE_CS42_2DS_TGACv1_177565_AA0580190,TRIAE_CS42_2DL_TGACv1_160628_AA0552420
GO:0060627	regulation of vesicle-mediated transport	biological_process	0.00025468	0.0032859	3	2784	4	74606	TRIAE_CS42_3AL_TGACv1_197715_AA0667040,TRIAE_CS42_3B_TGACv1_222072_AA0756730,TRIAE_CS42_3DL_TGACv1_250988_AA0875910
GO:0010035	response to inorganic substance	biological_process	0.00026179	0.0033711	36	2784	500	74606	TRIAE_CS42_7AS_TGACv1_570369_AA1834630,TRIAE_CS42_5DL_TGACv1_434775_AA1441440,TRIAE_CS42_U_TGACv1_643424_AA2131910,TRIAE_CS42_3DL_TGACv1_250847_AA0874070,TRIAE_CS42_2DS_TGACv1_177169_AA0567350,TRIAE_CS42_6AL_TGACv1_474572_AA1535460,TRIAE_CS42_6BL_TGACv1_500444_AA1604700,TRIAE_CS42_6AL_TGACv1_471582_AA1511400,TRIAE_CS42_7DL_TGACv1_603622_AA1986410,TRIAE_CS42_3DL_TGACv1_249205_AA0841320,TRIAE_CS42_…
GO:0030276	clathrin binding	molecular_function	0.00027051	0.0034767	8	2784	54	74606	TRIAE_CS42_4AL_TGACv1_288357_AA0946240,TRIAE_CS42_3DL_TGACv1_250339_AA0866430,TRIAE_CS42_4AL_TGACv1_288747_AA0957130,TRIAE_CS42_3B_TGACv1_220835_AA0720860,TRIAE_CS42_3AL_TGACv1_194328_AA0631110,TRIAE_CS42_4BS_TGACv1_328452_AA1088030,TRIAE_CS42_5AL_TGACv1_378411_AA1253160,TRIAE_CS42_4DS_TGACv1_362497_AA1180110
GO:0008299	isoprenoid biosynthetic process	biological_process	0.00027164	0.0034847	16	2784	164	74606	TRIAE_CS42_4AL_TGACv1_289727_AA0976030,TRIAE_CS42_2AS_TGACv1_112052_AA0328860,TRIAE_CS42_1DL_TGACv1_061444_AA0195450,TRIAE_CS42_6DL_TGACv1_527093_AA1698360,TRIAE_CS42_2DS_TGACv1_177352_AA0574250,TRIAE_CS42_6BL_TGACv1_501657_AA1619680,TRIAE_CS42_1AL_TGACv1_002642_AA0044130,TRIAE_CS42_7DS_TGACv1_622404_AA2038940,TRIAE_CS42_1BL_TGACv1_031194_AA0109500,TRIAE_CS42_7BS_TGACv1_591893_AA1924780,TRIAE_CS4…
GO:0006779	porphyrin-containing compound biosynthetic process	biological_process	0.00027244	0.0034883	12	2784	103	74606	TRIAE_CS42_2BS_TGACv1_146261_AA0460710,TRIAE_CS42_3AL_TGACv1_197079_AA0664730,TRIAE_CS42_4AS_TGACv1_306569_AA1010320,TRIAE_CS42_4DL_TGACv1_345711_AA1154220,TRIAE_CS42_3DS_TGACv1_273835_AA0933610,TRIAE_CS42_1BS_TGACv1_050930_AA0176780,TRIAE_CS42_1DS_TGACv1_082196_AA0264140,TRIAE_CS42_3AS_TGACv1_211390_AA0689620,TRIAE_CS42_4AL_TGACv1_289727_AA0976030,TRIAE_CS42_3B_TGACv1_224606_AA0798680,TRIAE_CS42…
GO:0022618	ribonucleoprotein complex assembly	biological_process	0.00028334	0.003614	14	2784	123	74606	TRIAE_CS42_U_TGACv1_642463_AA2118090,TRIAE_CS42_2AS_TGACv1_113484_AA0356720,TRIAE_CS42_2BL_TGACv1_130740_AA0417150,TRIAE_CS42_3B_TGACv1_223624_AA0784810,TRIAE_CS42_5DL_TGACv1_435150_AA1446750,TRIAE_CS42_5AL_TGACv1_377520_AA1247660,TRIAE_CS42_5AL_TGACv1_374249_AA1195140,TRIAE_CS42_6AS_TGACv1_486894_AA1566280,TRIAE_CS42_4BL_TGACv1_320636_AA1045250,TRIAE_CS42_2AL_TGACv1_094739_AA0302390,TRIAE_CS42_4…
GO:0071826	ribonucleoprotein complex subunit organization	biological_process	0.00028334	0.003614	14	2784	123	74606	TRIAE_CS42_2AL_TGACv1_094739_AA0302390,TRIAE_CS42_4BL_TGACv1_320636_AA1045250,TRIAE_CS42_6AS_TGACv1_486894_AA1566280,TRIAE_CS42_2DL_TGACv1_159654_AA0541050,TRIAE_CS42_5BL_TGACv1_404980_AA1317000,TRIAE_CS42_5BL_TGACv1_405701_AA1333330,TRIAE_CS42_4AL_TGACv1_289336_AA0969290,TRIAE_CS42_5DL_TGACv1_435150_AA1446750,TRIAE_CS42_3B_TGACv1_223624_AA0784810,TRIAE_CS42_2BL_TGACv1_130740_AA0417150,TRIAE_CS42…
GO:0097164	ammonium ion metabolic process	biological_process	0.00028755	0.003658	10	2784	83	74606	TRIAE_CS42_1BL_TGACv1_032207_AA0126810,TRIAE_CS42_3DL_TGACv1_254806_AA0896680,TRIAE_CS42_3B_TGACv1_221027_AA0727340,TRIAE_CS42_2DL_TGACv1_158886_AA0527840,TRIAE_CS42_3AL_TGACv1_196405_AA0660080,TRIAE_CS42_1DL_TGACv1_063094_AA0223830,TRIAE_CS42_3B_TGACv1_222617_AA0767980,TRIAE_CS42_1AL_TGACv1_000734_AA0018090,TRIAE_CS42_5AL_TGACv1_375327_AA1219960,TRIAE_CS42_1DL_TGACv1_062419_AA0214280
GO:0098656	anion transmembrane transport	biological_process	0.00028787	0.003658	19	2784	227	74606	TRIAE_CS42_3DL_TGACv1_252453_AA0890080,TRIAE_CS42_U_TGACv1_644844_AA2141960,TRIAE_CS42_3DL_TGACv1_249692_AA0854470,TRIAE_CS42_4DL_TGACv1_345350_AA1152790,TRIAE_CS42_3B_TGACv1_223199_AA0777850,TRIAE_CS42_5BL_TGACv1_405907_AA1337450,TRIAE_CS42_4AS_TGACv1_306930_AA1015160,TRIAE_CS42_3DS_TGACv1_271874_AA0909920,TRIAE_CS42_5AL_TGACv1_374188_AA1192880,TRIAE_CS42_5DL_TGACv1_432946_AA1395680,TRIAE_CS42_1…
GO:0048268	clathrin coat assembly	biological_process	0.00029496	0.003741	7	2784	41	74606	TRIAE_CS42_3B_TGACv1_220835_AA0720860,TRIAE_CS42_3AL_TGACv1_194328_AA0631110,TRIAE_CS42_4DS_TGACv1_362497_AA1180110,TRIAE_CS42_5AL_TGACv1_378411_AA1253160,TRIAE_CS42_4BS_TGACv1_328452_AA1088030,TRIAE_CS42_3DL_TGACv1_250339_AA0866430,TRIAE_CS42_4AL_TGACv1_288747_AA0957130
GO:0048608	reproductive structure development	biological_process	0.00030181	0.0038135	41	2784	657	74606	TRIAE_CS42_3DL_TGACv1_251216_AA0878910,TRIAE_CS42_4DL_TGACv1_345404_AA1153060,TRIAE_CS42_7AS_TGACv1_570244_AA1832810,TRIAE_CS42_2DL_TGACv1_158851_AA0527100,TRIAE_CS42_3DL_TGACv1_250864_AA0874390,TRIAE_CS42_1DL_TGACv1_061584_AA0199150,TRIAE_CS42_1AL_TGACv1_001119_AA0025400,TRIAE_CS42_7BL_TGACv1_578034_AA1888270,TRIAE_CS42_6DS_TGACv1_543504_AA1740860,TRIAE_CS42_1DS_TGACv1_081158_AA0258140,TRIAE_CS4…
GO:0061458	reproductive system development	biological_process	0.00030181	0.0038135	41	2784	657	74606	TRIAE_CS42_3AL_TGACv1_194246_AA0629560,TRIAE_CS42_4AL_TGACv1_289752_AA0976330,TRIAE_CS42_1DL_TGACv1_062985_AA0222610,TRIAE_CS42_U_TGACv1_642463_AA2118090,TRIAE_CS42_7DS_TGACv1_621538_AA2018830,TRIAE_CS42_5AL_TGACv1_377520_AA1247660,TRIAE_CS42_1BS_TGACv1_049652_AA0158940,TRIAE_CS42_2DS_TGACv1_177244_AA0570280,TRIAE_CS42_U_TGACv1_642542_AA2119280,TRIAE_CS42_2DS_TGACv1_179544_AA0607840,TRIAE_CS42_6D…
GO:0000096	sulfur amino acid metabolic process	biological_process	0.00030445	0.0038396	12	2784	103	74606	TRIAE_CS42_4AL_TGACv1_290117_AA0981910,TRIAE_CS42_5BL_TGACv1_406345_AA1344380,TRIAE_CS42_4BS_TGACv1_330819_AA1108930,TRIAE_CS42_7DS_TGACv1_624143_AA2059180,TRIAE_CS42_2DS_TGACv1_177565_AA0580190,TRIAE_CS42_5AL_TGACv1_374680_AA1206310,TRIAE_CS42_5AS_TGACv1_393328_AA1271350,TRIAE_CS42_5DS_TGACv1_456564_AA1474130,TRIAE_CS42_3AS_TGACv1_211963_AA0696070,TRIAE_CS42_4DS_TGACv1_361983_AA1175310,TRIAE_CS4…
GO:0015749	monosaccharide transport	biological_process	0.0003085	0.0038834	3	2784	5	74606	TRIAE_CS42_4DS_TGACv1_361391_AA1166860,TRIAE_CS42_4AL_TGACv1_289623_AA0974220,TRIAE_CS42_4BS_TGACv1_329699_AA1103360
GO:1990204	oxidoreductase complex	cellular_component	0.00031436	0.0039497	20	2784	183	74606	TRIAE_CS42_4BS_TGACv1_329474_AA1101780,TRIAE_CS42_4DS_TGACv1_362069_AA1176360,TRIAE_CS42_2DL_TGACv1_159162_AA0533640,TRIAE_CS42_7AL_TGACv1_556856_AA1772180,TRIAE_CS42_3AL_TGACv1_194753_AA0638830,TRIAE_CS42_4BS_TGACv1_330348_AA1107290,TRIAE_CS42_3B_TGACv1_227262_AA0822510,TRIAE_CS42_3AL_TGACv1_194074_AA0625970,TRIAE_CS42_3DL_TGACv1_250777_AA0872910,TRIAE_CS42_U_TGACv1_641717_AA2102380,TRIAE_CS42_4…
GO:0009791	post-embryonic development	biological_process	0.0003189	0.0039993	48	2784	811	74606	TRIAE_CS42_U_TGACv1_644844_AA2141960,TRIAE_CS42_4BL_TGACv1_320729_AA1047290,TRIAE_CS42_6AS_TGACv1_485973_AA1555030,TRIAE_CS42_U_TGACv1_640995_AA2081800,TRIAE_CS42_U_TGACv1_644248_AA2138300,TRIAE_CS42_U_TGACv1_644128_AA2137410,TRIAE_CS42_7AS_TGACv1_570369_AA1834630,TRIAE_CS42_5DL_TGACv1_433855_AA1423770,TRIAE_CS42_2DL_TGACv1_157916_AA0501640,TRIAE_CS42_1DL_TGACv1_061317_AA0192320,TRIAE_CS42_2BL_TG…
GO:0031122	cytoplasmic microtubule organization	biological_process	0.00032001	0.0040058	5	2784	19	74606	TRIAE_CS42_1DL_TGACv1_061092_AA0184750,TRIAE_CS42_3DS_TGACv1_272144_AA0915590,TRIAE_CS42_1DS_TGACv1_081003_AA0256680,TRIAE_CS42_1BL_TGACv1_030590_AA0094940,TRIAE_CS42_1AS_TGACv1_019520_AA0067630
GO:0006241	CTP biosynthetic process	biological_process	0.0003245	0.0040226	7	2784	36	74606	TRIAE_CS42_1DL_TGACv1_061176_AA0187850,TRIAE_CS42_4DS_TGACv1_361731_AA1172190,TRIAE_CS42_3AL_TGACv1_194109_AA0626660,TRIAE_CS42_3DL_TGACv1_249279_AA0843940,TRIAE_CS42_3B_TGACv1_223258_AA0779170,TRIAE_CS42_1BL_TGACv1_030377_AA0088540,TRIAE_CS42_1AL_TGACv1_000492_AA0013410
GO:0009148	pyrimidine nucleoside triphosphate biosynthetic process	biological_process	0.0003245	0.0040226	7	2784	36	74606	TRIAE_CS42_1AL_TGACv1_000492_AA0013410,TRIAE_CS42_1BL_TGACv1_030377_AA0088540,TRIAE_CS42_4DS_TGACv1_361731_AA1172190,TRIAE_CS42_3AL_TGACv1_194109_AA0626660,TRIAE_CS42_3DL_TGACv1_249279_AA0843940,TRIAE_CS42_3B_TGACv1_223258_AA0779170,TRIAE_CS42_1DL_TGACv1_061176_AA0187850
GO:0009208	pyrimidine ribonucleoside triphosphate metabolic process	biological_process	0.0003245	0.0040226	7	2784	36	74606	TRIAE_CS42_1DL_TGACv1_061176_AA0187850,TRIAE_CS42_1BL_TGACv1_030377_AA0088540,TRIAE_CS42_1AL_TGACv1_000492_AA0013410,TRIAE_CS42_4DS_TGACv1_361731_AA1172190,TRIAE_CS42_3DL_TGACv1_249279_AA0843940,TRIAE_CS42_3AL_TGACv1_194109_AA0626660,TRIAE_CS42_3B_TGACv1_223258_AA0779170
GO:0009209	pyrimidine ribonucleoside triphosphate biosynthetic process	biological_process	0.0003245	0.0040226	7	2784	36	74606	TRIAE_CS42_1AL_TGACv1_000492_AA0013410,TRIAE_CS42_1BL_TGACv1_030377_AA0088540,TRIAE_CS42_3AL_TGACv1_194109_AA0626660,TRIAE_CS42_4DS_TGACv1_361731_AA1172190,TRIAE_CS42_3DL_TGACv1_249279_AA0843940,TRIAE_CS42_3B_TGACv1_223258_AA0779170,TRIAE_CS42_1DL_TGACv1_061176_AA0187850
GO:0046036	CTP metabolic process	biological_process	0.0003245	0.0040226	7	2784	36	74606	TRIAE_CS42_1AL_TGACv1_000492_AA0013410,TRIAE_CS42_1BL_TGACv1_030377_AA0088540,TRIAE_CS42_3B_TGACv1_223258_AA0779170,TRIAE_CS42_3DL_TGACv1_249279_AA0843940,TRIAE_CS42_4DS_TGACv1_361731_AA1172190,TRIAE_CS42_3AL_TGACv1_194109_AA0626660,TRIAE_CS42_1DL_TGACv1_061176_AA0187850
GO:0004559	alpha-mannosidase activity	molecular_function	0.00032495	0.0040226	5	2784	21	74606	TRIAE_CS42_1DS_TGACv1_080723_AA0252750,TRIAE_CS42_3B_TGACv1_221138_AA0731590,TRIAE_CS42_6AL_TGACv1_472781_AA1525920,TRIAE_CS42_6DL_TGACv1_526986_AA1696660,TRIAE_CS42_6BL_TGACv1_501865_AA1621140
GO:0005253	anion channel activity	molecular_function	0.00032811	0.0040469	8	2784	53	74606	TRIAE_CS42_3DL_TGACv1_252453_AA0890080,TRIAE_CS42_3B_TGACv1_222757_AA0770040,TRIAE_CS42_5AL_TGACv1_378731_AA1254390,TRIAE_CS42_3DL_TGACv1_249692_AA0854470,TRIAE_CS42_4BL_TGACv1_321851_AA1066240,TRIAE_CS42_3DS_TGACv1_272832_AA0925630,TRIAE_CS42_4DL_TGACv1_345350_AA1152790,TRIAE_CS42_4AS_TGACv1_306930_AA1015160
GO:0008308	voltage-gated anion channel activity	molecular_function	0.00032811	0.0040469	8	2784	53	74606	TRIAE_CS42_3DL_TGACv1_252453_AA0890080,TRIAE_CS42_3DL_TGACv1_249692_AA0854470,TRIAE_CS42_5AL_TGACv1_378731_AA1254390,TRIAE_CS42_3B_TGACv1_222757_AA0770040,TRIAE_CS42_4DL_TGACv1_345350_AA1152790,TRIAE_CS42_3DS_TGACv1_272832_AA0925630,TRIAE_CS42_4BL_TGACv1_321851_AA1066240,TRIAE_CS42_4AS_TGACv1_306930_AA1015160
GO:0007017	microtubule-based process	biological_process	0.00033154	0.0040782	26	2784	406	74606	TRIAE_CS42_1BL_TGACv1_030590_AA0094940,TRIAE_CS42_3DL_TGACv1_249363_AA0846610,TRIAE_CS42_1DL_TGACv1_062210_AA0210520,TRIAE_CS42_U_TGACv1_641465_AA2095940,TRIAE_CS42_3DS_TGACv1_271717_AA0906460,TRIAE_CS42_1AL_TGACv1_000051_AA0001350,TRIAE_CS42_6BS_TGACv1_513186_AA1633440,TRIAE_CS42_5DS_TGACv1_457199_AA1483690,TRIAE_CS42_2DL_TGACv1_159064_AA0531650,TRIAE_CS42_1DS_TGACv1_081003_AA0256680,TRIAE_CS42_…
GO:0030126	COPI vesicle coat	cellular_component	0.00033187	0.0040782	5	2784	23	74606	TRIAE_CS42_1AL_TGACv1_001331_AA0028860,TRIAE_CS42_4BL_TGACv1_321458_AA1060720,TRIAE_CS42_1DL_TGACv1_061297_AA0191640,TRIAE_CS42_5AL_TGACv1_374774_AA1208800,TRIAE_CS42_1BL_TGACv1_031076_AA0107250
GO:0004571	mannosyl-oligosaccharide 1,2-alpha-mannosidase activity	molecular_function	0.00034639	0.0042413	4	2784	12	74606	TRIAE_CS42_6AL_TGACv1_472781_AA1525920,TRIAE_CS42_6DL_TGACv1_526986_AA1696660,TRIAE_CS42_6BL_TGACv1_501865_AA1621140,TRIAE_CS42_3B_TGACv1_221138_AA0731590
GO:0015924	mannosyl-oligosaccharide mannosidase activity	molecular_function	0.00034639	0.0042413	4	2784	12	74606	TRIAE_CS42_6BL_TGACv1_501865_AA1621140,TRIAE_CS42_6DL_TGACv1_526986_AA1696660,TRIAE_CS42_6AL_TGACv1_472781_AA1525920,TRIAE_CS42_3B_TGACv1_221138_AA0731590
GO:0005534	galactose binding	molecular_function	0.00034946	0.004271	4	2784	12	74606	TRIAE_CS42_7AL_TGACv1_557551_AA1782900,TRIAE_CS42_2BL_TGACv1_131119_AA0422830,TRIAE_CS42_2AL_TGACv1_093541_AA0282230,TRIAE_CS42_2DL_TGACv1_160680_AA0553060
GO:0016853	isomerase activity	molecular_function	0.0003545	0.0043248	57	2784	867	74606	TRIAE_CS42_4DS_TGACv1_361657_AA1171120,TRIAE_CS42_2AL_TGACv1_093532_AA0281910,TRIAE_CS42_1BS_TGACv1_049652_AA0158940,TRIAE_CS42_3DS_TGACv1_271475_AA0899660,TRIAE_CS42_4AL_TGACv1_288277_AA0943460,TRIAE_CS42_5BL_TGACv1_405295_AA1324290,TRIAE_CS42_4BL_TGACv1_320892_AA1051040,TRIAE_CS42_1DS_TGACv1_081158_AA0258140,TRIAE_CS42_5AS_TGACv1_393825_AA1276270,TRIAE_CS42_3DL_TGACv1_250086_AA0861990,TRIAE_CS4…
GO:0004372	glycine hydroxymethyltransferase activity	molecular_function	0.00035832	0.0043556	4	2784	11	74606	TRIAE_CS42_2DL_TGACv1_159916_AA0544360,TRIAE_CS42_2AL_TGACv1_094077_AA0292210,TRIAE_CS42_2BL_TGACv1_129567_AA0388870,TRIAE_CS42_4DS_TGACv1_362836_AA1182360
GO:0019264	glycine biosynthetic process from serine	biological_process	0.00035832	0.0043556	4	2784	11	74606	TRIAE_CS42_2BL_TGACv1_129567_AA0388870,TRIAE_CS42_2AL_TGACv1_094077_AA0292210,TRIAE_CS42_4DS_TGACv1_362836_AA1182360,TRIAE_CS42_2DL_TGACv1_159916_AA0544360
GO:0050661	NADP binding	molecular_function	0.00038213	0.0046366	19	2784	221	74606	TRIAE_CS42_6DS_TGACv1_542766_AA1729850,TRIAE_CS42_6AS_TGACv1_487743_AA1572700,TRIAE_CS42_2BS_TGACv1_145925_AA0449700,TRIAE_CS42_5BL_TGACv1_404321_AA1295470,TRIAE_CS42_2AS_TGACv1_112635_AA0342690,TRIAE_CS42_7DS_TGACv1_622404_AA2038940,TRIAE_CS42_1DS_TGACv1_082196_AA0264140,TRIAE_CS42_6AL_TGACv1_473639_AA1532140,TRIAE_CS42_6DL_TGACv1_526670_AA1689480,TRIAE_CS42_5AL_TGACv1_374630_AA1204880,TRIAE_CS4…
GO:0046912	transferase activity, transferring acyl groups, acyl groups converted into alkyl on transfer	molecular_function	0.00038795	0.0046988	6	2784	29	74606	TRIAE_CS42_3AS_TGACv1_212208_AA0698820,TRIAE_CS42_3B_TGACv1_223975_AA0790450,TRIAE_CS42_3DS_TGACv1_273018_AA0927550,TRIAE_CS42_5AL_TGACv1_378173_AA1251720,TRIAE_CS42_4DL_TGACv1_343496_AA1135330,TRIAE_CS42_7BS_TGACv1_591893_AA1924780
GO:0043648	dicarboxylic acid metabolic process	biological_process	0.00039355	0.004758	14	2784	133	74606	TRIAE_CS42_3B_TGACv1_222610_AA0767770,TRIAE_CS42_1AL_TGACv1_002631_AA0043990,TRIAE_CS42_1DL_TGACv1_061661_AA0201230,TRIAE_CS42_1BL_TGACv1_031464_AA0114600,TRIAE_CS42_3AL_TGACv1_193640_AA0616020,TRIAE_CS42_1BL_TGACv1_030950_AA0104200,TRIAE_CS42_3DS_TGACv1_272233_AA0917470,TRIAE_CS42_3B_TGACv1_220588_AA0709800,TRIAE_CS42_7BL_TGACv1_578944_AA1902350,TRIAE_CS42_3B_TGACv1_223879_AA0788930,TRIAE_CS42_1…
GO:0003873	6-phosphofructo-2-kinase activity	molecular_function	0.00042116	0.0050735	3	2784	6	74606	TRIAE_CS42_4DL_TGACv1_343659_AA1137850,TRIAE_CS42_4BL_TGACv1_320480_AA1040880,TRIAE_CS42_4AS_TGACv1_306645_AA1011430
GO:0006003	fructose 2,6-bisphosphate metabolic process	biological_process	0.00042116	0.0050735	3	2784	6	74606	TRIAE_CS42_4AS_TGACv1_306645_AA1011430,TRIAE_CS42_4DL_TGACv1_343659_AA1137850,TRIAE_CS42_4BL_TGACv1_320480_AA1040880
GO:0051049	regulation of transport	biological_process	0.00046174	0.0055524	9	2784	69	74606	TRIAE_CS42_4DL_TGACv1_342367_AA1111630,TRIAE_CS42_7DS_TGACv1_623153_AA2050180,TRIAE_CS42_3DL_TGACv1_250988_AA0875910,TRIAE_CS42_3DL_TGACv1_249213_AA0841560,TRIAE_CS42_3B_TGACv1_222072_AA0756730,TRIAE_CS42_U_TGACv1_640854_AA2077410,TRIAE_CS42_4AS_TGACv1_307317_AA1019370,TRIAE_CS42_3AL_TGACv1_197715_AA0667040,TRIAE_CS42_7BS_TGACv1_591976_AA1927160
GO:0008483	transaminase activity	molecular_function	0.00046902	0.0056199	12	2784	110	74606	TRIAE_CS42_6AS_TGACv1_487104_AA1568170,TRIAE_CS42_1DL_TGACv1_061095_AA0184930,TRIAE_CS42_6DS_TGACv1_543240_AA1737380,TRIAE_CS42_6AS_TGACv1_486551_AA1562560,TRIAE_CS42_1AL_TGACv1_001479_AA0031070,TRIAE_CS42_6AL_TGACv1_471819_AA1514670,TRIAE_CS42_7BL_TGACv1_581547_AA1917420,TRIAE_CS42_1AS_TGACv1_019912_AA0072730,TRIAE_CS42_6BS_TGACv1_513449_AA1641870,TRIAE_CS42_6DS_TGACv1_543365_AA1739120,TRIAE_CS4…
GO:0016769	transferase activity, transferring nitrogenous groups	molecular_function	0.00046902	0.0056199	12	2784	110	74606	TRIAE_CS42_6AL_TGACv1_471819_AA1514670,TRIAE_CS42_7BL_TGACv1_581547_AA1917420,TRIAE_CS42_1DL_TGACv1_061095_AA0184930,TRIAE_CS42_6AS_TGACv1_487104_AA1568170,TRIAE_CS42_6DS_TGACv1_543240_AA1737380,TRIAE_CS42_6AS_TGACv1_486551_AA1562560,TRIAE_CS42_1AL_TGACv1_001479_AA0031070,TRIAE_CS42_6DL_TGACv1_526902_AA1694710,TRIAE_CS42_1AS_TGACv1_019912_AA0072730,TRIAE_CS42_6BS_TGACv1_513449_AA1641870,TRIAE_CS4…
GO:0005759	mitochondrial matrix	cellular_component	0.00047051	0.0056277	12	2784	98	74606	TRIAE_CS42_7DS_TGACv1_622603_AA2042460,TRIAE_CS42_5BL_TGACv1_406279_AA1343630,TRIAE_CS42_3AS_TGACv1_211368_AA0689290,TRIAE_CS42_6DS_TGACv1_543529_AA1741250,TRIAE_CS42_7AS_TGACv1_570442_AA1835740,TRIAE_CS42_5AL_TGACv1_376570_AA1238560,TRIAE_CS42_4AL_TGACv1_292578_AA0999200,TRIAE_CS42_6AS_TGACv1_486557_AA1562630,TRIAE_CS42_6DS_TGACv1_544326_AA1747750,TRIAE_CS42_3DS_TGACv1_272104_AA0914870,TRIAE_CS4…
GO:0004594	pantothenate kinase activity	molecular_function	0.00047467	0.0056673	3	2784	6	74606	TRIAE_CS42_5AL_TGACv1_374789_AA1209000,TRIAE_CS42_5DL_TGACv1_435540_AA1451810,TRIAE_CS42_5BL_TGACv1_406155_AA1341460
GO:0004134	4-alpha-glucanotransferase activity	molecular_function	0.00048996	0.0058396	3	2784	6	74606	TRIAE_CS42_2AS_TGACv1_112747_AA0344470,TRIAE_CS42_2BS_TGACv1_148740_AA0494910,TRIAE_CS42_2DS_TGACv1_177436_AA0577070
GO:0048731	system development	biological_process	0.0004938	0.0058749	56	2784	1005	74606	TRIAE_CS42_5BL_TGACv1_405701_AA1333330,TRIAE_CS42_1AL_TGACv1_005510_AA0054870,TRIAE_CS42_5DL_TGACv1_434879_AA1443050,TRIAE_CS42_4BS_TGACv1_328196_AA1084480,TRIAE_CS42_5AL_TGACv1_375748_AA1226550,TRIAE_CS42_6BL_TGACv1_499837_AA1592870,TRIAE_CS42_2DS_TGACv1_179266_AA0605730,TRIAE_CS42_2AS_TGACv1_112739_AA0344340,TRIAE_CS42_5BL_TGACv1_405128_AA1320750,TRIAE_CS42_4DL_TGACv1_343749_AA1139150,TRIAE_CS4…
GO:0005753	mitochondrial proton-transporting ATP synthase complex	cellular_component	0.00049742	0.0059076	7	2784	31	74606	TRIAE_CS42_2DL_TGACv1_158421_AA0518370,TRIAE_CS42_1AL_TGACv1_000051_AA0001340,TRIAE_CS42_1BL_TGACv1_031692_AA0118950,TRIAE_CS42_2AL_TGACv1_095324_AA0309650,TRIAE_CS42_1DL_TGACv1_062210_AA0210500,TRIAE_CS42_1AL_TGACv1_002629_AA0043900,TRIAE_CS42_2BL_TGACv1_130381_AA0409970
GO:0019751	polyol metabolic process	biological_process	0.00052718	0.0062499	8	2784	52	74606	TRIAE_CS42_7AL_TGACv1_556888_AA1772870,TRIAE_CS42_4BL_TGACv1_320456_AA1039910,TRIAE_CS42_4DL_TGACv1_342557_AA1116570,TRIAE_CS42_7DS_TGACv1_621640_AA2021920,TRIAE_CS42_4AS_TGACv1_307361_AA1019860,TRIAE_CS42_4AL_TGACv1_288528_AA0951160,TRIAE_CS42_5AL_TGACv1_376140_AA1232710,TRIAE_CS42_7DL_TGACv1_603779_AA1989110
GO:0006901	vesicle coating	biological_process	0.00053831	0.0063707	7	2784	47	74606	TRIAE_CS42_3B_TGACv1_220835_AA0720860,TRIAE_CS42_3AL_TGACv1_194328_AA0631110,TRIAE_CS42_4DS_TGACv1_362497_AA1180110,TRIAE_CS42_5AL_TGACv1_378411_AA1253160,TRIAE_CS42_4BS_TGACv1_328452_AA1088030,TRIAE_CS42_4AL_TGACv1_288747_AA0957130,TRIAE_CS42_3DL_TGACv1_250339_AA0866430
GO:0033014	tetrapyrrole biosynthetic process	biological_process	0.00055777	0.0065894	13	2784	125	74606	TRIAE_CS42_3B_TGACv1_224606_AA0798680,TRIAE_CS42_5DS_TGACv1_458609_AA1494170,TRIAE_CS42_4BL_TGACv1_322099_AA1068530,TRIAE_CS42_2AS_TGACv1_113806_AA0360900,TRIAE_CS42_3AS_TGACv1_211390_AA0689620,TRIAE_CS42_4AL_TGACv1_289727_AA0976030,TRIAE_CS42_4DL_TGACv1_345711_AA1154220,TRIAE_CS42_3DS_TGACv1_273835_AA0933610,TRIAE_CS42_1BS_TGACv1_050930_AA0176780,TRIAE_CS42_1DS_TGACv1_082196_AA0264140,TRIAE_CS42…
GO:0030118	clathrin coat	cellular_component	0.00058647	0.0069162	7	2784	45	74606	TRIAE_CS42_5AL_TGACv1_378411_AA1253160,TRIAE_CS42_4DS_TGACv1_362497_AA1180110,TRIAE_CS42_4BS_TGACv1_328452_AA1088030,TRIAE_CS42_7AL_TGACv1_556695_AA1769100,TRIAE_CS42_4AL_TGACv1_288747_AA0957130,TRIAE_CS42_4AL_TGACv1_288357_AA0946240,TRIAE_CS42_7DL_TGACv1_602635_AA1963430
GO:0070546	L-phenylalanine aminotransferase activity	molecular_function	0.00059274	0.0069658	4	2784	12	74606	TRIAE_CS42_6BS_TGACv1_513449_AA1641870,TRIAE_CS42_6DS_TGACv1_543365_AA1739120,TRIAE_CS42_6AS_TGACv1_487104_AA1568170,TRIAE_CS42_7BL_TGACv1_581547_AA1917420
GO:0080130	L-phenylalanine:2-oxoglutarate aminotransferase activity	molecular_function	0.00059274	0.0069658	4	2784	12	74606	TRIAE_CS42_7BL_TGACv1_581547_AA1917420,TRIAE_CS42_6AS_TGACv1_487104_AA1568170,TRIAE_CS42_6BS_TGACv1_513449_AA1641870,TRIAE_CS42_6DS_TGACv1_543365_AA1739120
GO:0010038	response to metal ion	biological_process	0.00061592	0.0072255	16	2784	176	74606	TRIAE_CS42_3B_TGACv1_220619_AA0711750,TRIAE_CS42_U_TGACv1_642723_AA2122250,TRIAE_CS42_4BL_TGACv1_320288_AA1034040,TRIAE_CS42_2AS_TGACv1_112739_AA0344340,TRIAE_CS42_7DL_TGACv1_603622_AA1986410,TRIAE_CS42_U_TGACv1_644297_AA2138670,TRIAE_CS42_3DL_TGACv1_251216_AA0878910,TRIAE_CS42_3DL_TGACv1_249205_AA0841320,TRIAE_CS42_3AL_TGACv1_194246_AA0629560,TRIAE_CS42_U_TGACv1_643424_AA2131910,TRIAE_CS42_3AL_T…
GO:0009069	serine family amino acid metabolic process	biological_process	0.00061802	0.0072375	11	2784	94	74606	TRIAE_CS42_3AS_TGACv1_211963_AA0696070,TRIAE_CS42_U_TGACv1_641020_AA2082360,TRIAE_CS42_2BL_TGACv1_129567_AA0388870,TRIAE_CS42_2AL_TGACv1_094077_AA0292210,TRIAE_CS42_4DS_TGACv1_362836_AA1182360,TRIAE_CS42_2BL_TGACv1_130544_AA0413270,TRIAE_CS42_2DL_TGACv1_159916_AA0544360,TRIAE_CS42_7BL_TGACv1_580117_AA1912080,TRIAE_CS42_2DS_TGACv1_177565_AA0580190,TRIAE_CS42_2DL_TGACv1_160628_AA0552420,TRIAE_CS42_…
GO:0004738	pyruvate dehydrogenase activity	molecular_function	0.00063305	0.007375	4	2784	12	74606	TRIAE_CS42_2BS_TGACv1_148429_AA0492770,TRIAE_CS42_5AL_TGACv1_376570_AA1238560,TRIAE_CS42_5BL_TGACv1_406279_AA1343630,TRIAE_CS42_2AS_TGACv1_112938_AA0348140
GO:0004739	pyruvate dehydrogenase (acetyl-transferring) activity	molecular_function	0.00063305	0.007375	4	2784	12	74606	TRIAE_CS42_2BS_TGACv1_148429_AA0492770,TRIAE_CS42_5AL_TGACv1_376570_AA1238560,TRIAE_CS42_5BL_TGACv1_406279_AA1343630,TRIAE_CS42_2AS_TGACv1_112938_AA0348140
GO:0006086	acetyl-CoA biosynthetic process from pyruvate	biological_process	0.00063305	0.007375	4	2784	12	74606	TRIAE_CS42_2AS_TGACv1_112938_AA0348140,TRIAE_CS42_2BS_TGACv1_148429_AA0492770,TRIAE_CS42_5AL_TGACv1_376570_AA1238560,TRIAE_CS42_5BL_TGACv1_406279_AA1343630
GO:0006536	glutamate metabolic process	biological_process	0.00063539	0.0073895	6	2784	32	74606	TRIAE_CS42_3B_TGACv1_222610_AA0767770,TRIAE_CS42_3DS_TGACv1_272233_AA0917470,TRIAE_CS42_3B_TGACv1_220588_AA0709800,TRIAE_CS42_U_TGACv1_654540_AA2150720,TRIAE_CS42_3AL_TGACv1_193640_AA0616020,TRIAE_CS42_3AS_TGACv1_211026_AA0683390
GO:0009066	aspartate family amino acid metabolic process	biological_process	0.00064119	0.007444	11	2784	95	74606	TRIAE_CS42_7DS_TGACv1_624143_AA2059180,TRIAE_CS42_5AL_TGACv1_374680_AA1206310,TRIAE_CS42_4BS_TGACv1_330819_AA1108930,TRIAE_CS42_5BL_TGACv1_406345_AA1344380,TRIAE_CS42_4AL_TGACv1_290117_AA0981910,TRIAE_CS42_4DL_TGACv1_343385_AA1133850,TRIAE_CS42_5BS_TGACv1_423584_AA1379990,TRIAE_CS42_4DS_TGACv1_361983_AA1175310,TRIAE_CS42_4BL_TGACv1_322214_AA1069720,TRIAE_CS42_5DS_TGACv1_456564_AA1474130,TRIAE_CS4…
GO:0010363	regulation of plant-type hypersensitive response	biological_process	0.00065939	0.0076421	3	2784	5	74606	TRIAE_CS42_1AL_TGACv1_002853_AA0045580,TRIAE_CS42_1BL_TGACv1_030567_AA0094200,TRIAE_CS42_1DL_TGACv1_062362_AA0213270
GO:0098662	inorganic cation transmembrane transport	biological_process	0.00066306	0.0076714	36	2784	567	74606	TRIAE_CS42_2BL_TGACv1_130381_AA0409970,TRIAE_CS42_3DL_TGACv1_249213_AA0841560,TRIAE_CS42_5DL_TGACv1_433496_AA1414720,TRIAE_CS42_3DL_TGACv1_250717_AA0872310,TRIAE_CS42_7BL_TGACv1_579860_AA1910590,TRIAE_CS42_4AL_TGACv1_288269_AA0942920,TRIAE_CS42_2BL_TGACv1_129973_AA0400750,TRIAE_CS42_3B_TGACv1_224031_AA0791230,TRIAE_CS42_5DL_TGACv1_436184_AA1459030,TRIAE_CS42_1AL_TGACv1_004040_AA0052320,TRIAE_CS42…
GO:0004345	glucose-6-phosphate dehydrogenase activity	molecular_function	0.00067415	0.0077863	4	2784	13	74606	TRIAE_CS42_6DL_TGACv1_527365_AA1702830,TRIAE_CS42_2AS_TGACv1_112635_AA0342690,TRIAE_CS42_2BS_TGACv1_145925_AA0449700,TRIAE_CS42_6AL_TGACv1_473639_AA1532140
GO:0030261	chromosome condensation	biological_process	0.00068772	0.0079294	5	2784	23	74606	TRIAE_CS42_6AL_TGACv1_473440_AA1531120,TRIAE_CS42_3AL_TGACv1_195859_AA0654910,TRIAE_CS42_2BS_TGACv1_146093_AA0455120,TRIAE_CS42_2AL_TGACv1_098666_AA0326490,TRIAE_CS42_3B_TGACv1_226023_AA0813450
GO:0045824	negative regulation of innate immune response	biological_process	0.00069199	0.0079514	4	2784	13	74606	TRIAE_CS42_1DL_TGACv1_062362_AA0213270,TRIAE_CS42_7BL_TGACv1_578034_AA1888270,TRIAE_CS42_1BL_TGACv1_030567_AA0094200,TRIAE_CS42_1AL_TGACv1_002853_AA0045580
GO:0050777	negative regulation of immune response	biological_process	0.00069199	0.0079514	4	2784	13	74606	TRIAE_CS42_1BL_TGACv1_030567_AA0094200,TRIAE_CS42_7BL_TGACv1_578034_AA1888270,TRIAE_CS42_1AL_TGACv1_002853_AA0045580,TRIAE_CS42_1DL_TGACv1_062362_AA0213270
GO:0000097	sulfur amino acid biosynthetic process	biological_process	0.00070262	0.0080597	10	2784	81	74606	TRIAE_CS42_4AL_TGACv1_290117_AA0981910,TRIAE_CS42_2DS_TGACv1_177565_AA0580190,TRIAE_CS42_7DS_TGACv1_624143_AA2059180,TRIAE_CS42_4BS_TGACv1_330819_AA1108930,TRIAE_CS42_5AS_TGACv1_393328_AA1271350,TRIAE_CS42_5DS_TGACv1_456564_AA1474130,TRIAE_CS42_4DL_TGACv1_343385_AA1133850,TRIAE_CS42_4DS_TGACv1_361983_AA1175310,TRIAE_CS42_3AS_TGACv1_211963_AA0696070,TRIAE_CS42_5BS_TGACv1_423584_AA1379990
GO:0005515	protein binding	molecular_function	0.00070699	0.0080961	627	2784	15736	74606	TRIAE_CS42_3DL_TGACv1_249363_AA0846610,TRIAE_CS42_4AS_TGACv1_307431_AA1020380,TRIAE_CS42_U_TGACv1_640949_AA2080400,TRIAE_CS42_7AL_TGACv1_558076_AA1789880,TRIAE_CS42_1BS_TGACv1_049375_AA0151120,TRIAE_CS42_2BL_TGACv1_129425_AA0383190,TRIAE_CS42_2DL_TGACv1_158618_AA0523310,TRIAE_CS42_1DS_TGACv1_080666_AA0251960,TRIAE_CS42_1DL_TGACv1_061172_AA0187770,TRIAE_CS42_7BL_TGACv1_577724_AA1881930,TRIAE_CS42_…
GO:0044238	primary metabolic process	biological_process	0.00072616	0.0083014	989	2784	25194	74606	TRIAE_CS42_6BL_TGACv1_500297_AA1602810,TRIAE_CS42_2DS_TGACv1_179778_AA0609130,TRIAE_CS42_4BL_TGACv1_321575_AA1062420,TRIAE_CS42_7AL_TGACv1_558055_AA1789640,TRIAE_CS42_2AL_TGACv1_093662_AA0284750,TRIAE_CS42_4DS_TGACv1_362194_AA1177660,TRIAE_CS42_3B_TGACv1_228460_AA0826890,TRIAE_CS42_4BS_TGACv1_330348_AA1107290,TRIAE_CS42_1BL_TGACv1_030377_AA0088540,TRIAE_CS42_5BL_TGACv1_406345_AA1344380,TRIAE_CS42…
1_061246_AA0189820,TRIAE_CS42_2AL_TGACv1_093053_AA0270540,TRIAE_CS42_2AS_TGACv1_112747_AA0344470,TRIAE_CS42_7DS_TGACv1_624347_AA2060690,TRIAE_CS42_3B_TGACv1_225182_AA0805900,TRIAE_CS42_6DS_TGACv1_543042_AA1734510,TRIAE_CS42_2AL_TGACv1_097675_AA0324860,TRIAE_CS42_5AS_TGACv1_392576_AA1261150,TRIAE_CS42_2DL_TGACv1_158383_AA0517020,TRIAE_CS42_2AS_TGACv1_112396_AA0337300,TRIAE_CS42_2DS_TGACv1_177309_A…
GO:0000829	inositol heptakisphosphate kinase activity	molecular_function	0.00074427	0.008494	3	2784	7	74606	TRIAE_CS42_4AL_TGACv1_288750_AA0957210,TRIAE_CS42_6BL_TGACv1_499743_AA1590800,TRIAE_CS42_4DS_TGACv1_361106_AA1161070
GO:0046686	response to cadmium ion	biological_process	0.00075923	0.0086501	12	2784	114	74606	TRIAE_CS42_2AS_TGACv1_112739_AA0344340,TRIAE_CS42_6AL_TGACv1_474572_AA1535460,TRIAE_CS42_1BS_TGACv1_049652_AA0158940,TRIAE_CS42_U_TGACv1_642723_AA2122250,TRIAE_CS42_3AL_TGACv1_194246_AA0629560,TRIAE_CS42_U_TGACv1_643424_AA2131910,TRIAE_CS42_1DS_TGACv1_081158_AA0258140,TRIAE_CS42_3DL_TGACv1_249205_AA0841320,TRIAE_CS42_3DL_TGACv1_251216_AA0878910,TRIAE_CS42_2DS_TGACv1_177244_AA0570280,TRIAE_CS42_U_…
GO:0006007	glucose catabolic process	biological_process	0.00077006	0.0087586	3	2784	6	74606	TRIAE_CS42_3DL_TGACv1_251020_AA0876220,TRIAE_CS42_3B_TGACv1_222141_AA0758150,TRIAE_CS42_3AL_TGACv1_196039_AA0656760
GO:0046653	tetrahydrofolate metabolic process	biological_process	0.00077356	0.0087776	6	2784	29	74606	TRIAE_CS42_5BL_TGACv1_406345_AA1344380,TRIAE_CS42_2DL_TGACv1_159916_AA0544360,TRIAE_CS42_5AL_TGACv1_374680_AA1206310,TRIAE_CS42_2BL_TGACv1_129567_AA0388870,TRIAE_CS42_2AL_TGACv1_094077_AA0292210,TRIAE_CS42_4DS_TGACv1_362836_AA1182360
GO:0004421	hydroxymethylglutaryl-CoA synthase activity	molecular_function	0.00077434	0.0087776	3	2784	6	74606	TRIAE_CS42_7BS_TGACv1_591893_AA1924780,TRIAE_CS42_4DL_TGACv1_343496_AA1135330,TRIAE_CS42_5AL_TGACv1_378173_AA1251720
GO:0044455	mitochondrial membrane part	cellular_component	0.00078424	0.0088749	18	2784	163	74606	TRIAE_CS42_3B_TGACv1_223525_AA0783520,TRIAE_CS42_2BL_TGACv1_130381_AA0409970,TRIAE_CS42_U_TGACv1_641717_AA2102380,TRIAE_CS42_4BS_TGACv1_328196_AA1084480,TRIAE_CS42_7AS_TGACv1_571112_AA1844780,TRIAE_CS42_4BS_TGACv1_329474_AA1101780,TRIAE_CS42_3AL_TGACv1_194730_AA0638300,TRIAE_CS42_7AL_TGACv1_556856_AA1772180,TRIAE_CS42_1BL_TGACv1_031692_AA0118950,TRIAE_CS42_1DL_TGACv1_062210_AA0210500,TRIAE_CS42_4…
GO:0009651	response to salt stress	biological_process	0.0007933	0.0089612	21	2784	266	74606	TRIAE_CS42_5BL_TGACv1_405701_AA1333330,TRIAE_CS42_3B_TGACv1_222072_AA0756730,TRIAE_CS42_2BS_TGACv1_146115_AA0455680,TRIAE_CS42_6AL_TGACv1_472254_AA1519880,TRIAE_CS42_2BL_TGACv1_130381_AA0409970,TRIAE_CS42_3DL_TGACv1_250988_AA0875910,TRIAE_CS42_2BL_TGACv1_131489_AA0428400,TRIAE_CS42_2BL_TGACv1_129353_AA0379950,TRIAE_CS42_2DL_TGACv1_158421_AA0518370,TRIAE_CS42_7DL_TGACv1_603800_AA1989460,TRIAE_CS42…
GO:0004013	adenosylhomocysteinase activity	molecular_function	0.00079854	0.0089612	3	2784	6	74606	TRIAE_CS42_2AL_TGACv1_094486_AA0298610,TRIAE_CS42_2DL_TGACv1_158777_AA0526010,TRIAE_CS42_2AL_TGACv1_094077_AA0292200
GO:0016801	hydrolase activity, acting on ether bonds	molecular_function	0.00079854	0.0089612	3	2784	6	74606	TRIAE_CS42_2AL_TGACv1_094486_AA0298610,TRIAE_CS42_2AL_TGACv1_094077_AA0292200,TRIAE_CS42_2DL_TGACv1_158777_AA0526010
GO:0016802	trialkylsulfonium hydrolase activity	molecular_function	0.00079854	0.0089612	3	2784	6	74606	TRIAE_CS42_2AL_TGACv1_094077_AA0292200,TRIAE_CS42_2DL_TGACv1_158777_AA0526010,TRIAE_CS42_2AL_TGACv1_094486_AA0298610
GO:0019510	S-adenosylhomocysteine catabolic process	biological_process	0.00079854	0.0089612	3	2784	6	74606	TRIAE_CS42_2AL_TGACv1_094486_AA0298610,TRIAE_CS42_2AL_TGACv1_094077_AA0292200,TRIAE_CS42_2DL_TGACv1_158777_AA0526010
GO:0009915	phloem sucrose loading	biological_process	0.00081701	0.0091532	3	2784	6	74606	TRIAE_CS42_7AL_TGACv1_559693_AA1800520,TRIAE_CS42_7DL_TGACv1_604116_AA1994020,TRIAE_CS42_7BL_TGACv1_577849_AA1884560
GO:0009218	pyrimidine ribonucleotide metabolic process	biological_process	0.00082537	0.0091857	7	2784	42	74606	TRIAE_CS42_1AL_TGACv1_000492_AA0013410,TRIAE_CS42_1BL_TGACv1_030377_AA0088540,TRIAE_CS42_4DS_TGACv1_361731_AA1172190,TRIAE_CS42_3AL_TGACv1_194109_AA0626660,TRIAE_CS42_3DL_TGACv1_249279_AA0843940,TRIAE_CS42_3B_TGACv1_223258_AA0779170,TRIAE_CS42_1DL_TGACv1_061176_AA0187850
GO:0009220	pyrimidine ribonucleotide biosynthetic process	biological_process	0.00082537	0.0091857	7	2784	42	74606	TRIAE_CS42_1DL_TGACv1_061176_AA0187850,TRIAE_CS42_3AL_TGACv1_194109_AA0626660,TRIAE_CS42_4DS_TGACv1_361731_AA1172190,TRIAE_CS42_3DL_TGACv1_249279_AA0843940,TRIAE_CS42_3B_TGACv1_223258_AA0779170,TRIAE_CS42_1AL_TGACv1_000492_AA0013410,TRIAE_CS42_1BL_TGACv1_030377_AA0088540
GO:0046132	pyrimidine ribonucleoside biosynthetic process	biological_process	0.00082537	0.0091857	7	2784	42	74606	TRIAE_CS42_1DL_TGACv1_061176_AA0187850,TRIAE_CS42_1AL_TGACv1_000492_AA0013410,TRIAE_CS42_1BL_TGACv1_030377_AA0088540,TRIAE_CS42_3B_TGACv1_223258_AA0779170,TRIAE_CS42_3AL_TGACv1_194109_AA0626660,TRIAE_CS42_4DS_TGACv1_361731_AA1172190,TRIAE_CS42_3DL_TGACv1_249279_AA0843940
GO:0046134	pyrimidine nucleoside biosynthetic process	biological_process	0.00082537	0.0091857	7	2784	42	74606	TRIAE_CS42_4DS_TGACv1_361731_AA1172190,TRIAE_CS42_3DL_TGACv1_249279_AA0843940,TRIAE_CS42_3AL_TGACv1_194109_AA0626660,TRIAE_CS42_3B_TGACv1_223258_AA0779170,TRIAE_CS42_1AL_TGACv1_000492_AA0013410,TRIAE_CS42_1BL_TGACv1_030377_AA0088540,TRIAE_CS42_1DL_TGACv1_061176_AA0187850
GO:0045550	geranylgeranyl reductase activity	molecular_function	0.00084081	0.009342	3	2784	6	74606	TRIAE_CS42_3DS_TGACv1_273835_AA0933610,TRIAE_CS42_3B_TGACv1_224606_AA0798680,TRIAE_CS42_3AS_TGACv1_211390_AA0689620
GO:0016780	phosphotransferase activity, for other substituted phosphate groups	molecular_function	0.00084789	0.0094051	6	2784	34	74606	TRIAE_CS42_4AL_TGACv1_288281_AA0943580,TRIAE_CS42_6DL_TGACv1_526566_AA1687250,TRIAE_CS42_6AS_TGACv1_485260_AA1541800,TRIAE_CS42_2BL_TGACv1_131580_AA0429370,TRIAE_CS42_7BS_TGACv1_592341_AA1936030,TRIAE_CS42_U_TGACv1_643776_AA2134960
GO:0008235	metalloexopeptidase activity	molecular_function	0.00086801	0.0096091	7	2784	44	74606	TRIAE_CS42_1AL_TGACv1_000625_AA0016150,TRIAE_CS42_1DL_TGACv1_061968_AA0206620,TRIAE_CS42_6AL_TGACv1_471981_AA1516510,TRIAE_CS42_1BL_TGACv1_032431_AA0129810,TRIAE_CS42_4DL_TGACv1_342605_AA1117760,TRIAE_CS42_6AL_TGACv1_471730_AA1513500,TRIAE_CS42_6DL_TGACv1_528468_AA1714320
GO:0010154	fruit development	biological_process	0.00086914	0.0096091	25	2784	351	74606	TRIAE_CS42_7AS_TGACv1_570244_AA1832810,TRIAE_CS42_4DL_TGACv1_345404_AA1153060,TRIAE_CS42_3DL_TGACv1_251216_AA0878910,TRIAE_CS42_3DL_TGACv1_250864_AA0874390,TRIAE_CS42_2DL_TGACv1_158851_AA0527100,TRIAE_CS42_2AS_TGACv1_112739_AA0344340,TRIAE_CS42_1AL_TGACv1_001119_AA0025400,TRIAE_CS42_U_TGACv1_640757_AA2072670,TRIAE_CS42_7DS_TGACv1_621997_AA2030830,TRIAE_CS42_5BL_TGACv1_405128_AA1320750,TRIAE_CS42_…
GO:0008238	exopeptidase activity	molecular_function	0.00087457	0.0096533	22	2784	298	74606	TRIAE_CS42_1BL_TGACv1_032431_AA0129810,TRIAE_CS42_1AL_TGACv1_001070_AA0024440,TRIAE_CS42_6DL_TGACv1_528468_AA1714320,TRIAE_CS42_6AS_TGACv1_486130_AA1557260,TRIAE_CS42_1DL_TGACv1_062429_AA0214370,TRIAE_CS42_3DL_TGACv1_251312_AA0880040,TRIAE_CS42_7DL_TGACv1_604548_AA1999320,TRIAE_CS42_1DL_TGACv1_062495_AA0215350,TRIAE_CS42_1BL_TGACv1_032099_AA0125390,TRIAE_CS42_1AL_TGACv1_003876_AA0051820,TRIAE_CS4…
GO:0004316	3-oxoacyl-[acyl-carrier-protein] reductase (NADPH) activity	molecular_function	0.00090274	0.0099479	3	2784	6	74606	TRIAE_CS42_2DL_TGACv1_162478_AA0562870,TRIAE_CS42_2AL_TGACv1_093558_AA0282560,TRIAE_CS42_2BL_TGACv1_129465_AA0384880
GO:0016725	oxidoreductase activity, acting on CH or CH2 groups	molecular_function	0.00091457	0.010062	4	2784	15	74606	TRIAE_CS42_1AL_TGACv1_000695_AA0017180,TRIAE_CS42_7DS_TGACv1_623124_AA2049810,TRIAE_CS42_7AS_TGACv1_571621_AA1848880,TRIAE_CS42_1BL_TGACv1_033227_AA0137910
GO:0006563	L-serine metabolic process	biological_process	0.00093782	0.010301	9	2784	70	74606	TRIAE_CS42_2BL_TGACv1_130544_AA0413270,TRIAE_CS42_2BL_TGACv1_129567_AA0388870,TRIAE_CS42_2AL_TGACv1_094077_AA0292210,TRIAE_CS42_4DS_TGACv1_362836_AA1182360,TRIAE_CS42_U_TGACv1_641020_AA2082360,TRIAE_CS42_3AS_TGACv1_211963_AA0696070,TRIAE_CS42_2DL_TGACv1_160628_AA0552420,TRIAE_CS42_2DL_TGACv1_159916_AA0544360,TRIAE_CS42_7BL_TGACv1_580117_AA1912080
GO:0006811	ion transport	biological_process	0.00094977	0.010415	85	2784	1654	74606	TRIAE_CS42_6AL_TGACv1_470942_AA1499130,TRIAE_CS42_3B_TGACv1_224031_AA0791230,TRIAE_CS42_2BL_TGACv1_130381_AA0409970,TRIAE_CS42_4BL_TGACv1_321851_AA1066240,TRIAE_CS42_U_TGACv1_640699_AA2069290,TRIAE_CS42_5DL_TGACv1_433496_AA1414720,TRIAE_CS42_3DL_TGACv1_250717_AA0872310,TRIAE_CS42_5DL_TGACv1_436184_AA1459030,TRIAE_CS42_7AL_TGACv1_559344_AA1799200,TRIAE_CS42_1AL_TGACv1_000296_AA0008180,TRIAE_CS42_5…
GO:0042126	nitrate metabolic process	biological_process	0.00099412	0.010848	4	2784	15	74606	TRIAE_CS42_7AS_TGACv1_569986_AA1828160,TRIAE_CS42_7DS_TGACv1_622272_AA2036850,TRIAE_CS42_6DS_TGACv1_543770_AA1744010,TRIAE_CS42_6AS_TGACv1_486190_AA1557980
GO:0042128	nitrate assimilation	biological_process	0.00099412	0.010848	4	2784	15	74606	TRIAE_CS42_7AS_TGACv1_569986_AA1828160,TRIAE_CS42_6AS_TGACv1_486190_AA1557980,TRIAE_CS42_6DS_TGACv1_543770_AA1744010,TRIAE_CS42_7DS_TGACv1_622272_AA2036850
GO:2001057	reactive nitrogen species metabolic process	biological_process	0.00099412	0.010848	4	2784	15	74606	TRIAE_CS42_7AS_TGACv1_569986_AA1828160,TRIAE_CS42_6AS_TGACv1_486190_AA1557980,TRIAE_CS42_7DS_TGACv1_622272_AA2036850,TRIAE_CS42_6DS_TGACv1_543770_AA1744010
GO:0006020	inositol metabolic process	biological_process	0.0010062	0.010962	4	2784	13	74606	TRIAE_CS42_4AS_TGACv1_307361_AA1019860,TRIAE_CS42_4DL_TGACv1_342557_AA1116570,TRIAE_CS42_4AL_TGACv1_288528_AA0951160,TRIAE_CS42_4BL_TGACv1_320456_AA1039910
GO:0009147	pyrimidine nucleoside triphosphate metabolic process	biological_process	0.0010089	0.010974	7	2784	42	74606	TRIAE_CS42_1DL_TGACv1_061176_AA0187850,TRIAE_CS42_4DS_TGACv1_361731_AA1172190,TRIAE_CS42_3AL_TGACv1_194109_AA0626660,TRIAE_CS42_3DL_TGACv1_249279_AA0843940,TRIAE_CS42_3B_TGACv1_223258_AA0779170,TRIAE_CS42_1AL_TGACv1_000492_AA0013410,TRIAE_CS42_1BL_TGACv1_030377_AA0088540
GO:0016635	oxidoreductase activity, acting on the CH-CH group of donors, quinone or related compound as acceptor	molecular_function	0.0010172	0.011046	4	2784	13	74606	TRIAE_CS42_2DS_TGACv1_177352_AA0574250,TRIAE_CS42_2BS_TGACv1_145984_AA0451870,TRIAE_CS42_2AS_TGACv1_112052_AA0328860,TRIAE_CS42_5DL_TGACv1_434321_AA1433910
GO:0006545	glycine biosynthetic process	biological_process	0.0010416	0.011247	4	2784	14	74606	TRIAE_CS42_2DL_TGACv1_159916_AA0544360,TRIAE_CS42_2AL_TGACv1_094077_AA0292210,TRIAE_CS42_2BL_TGACv1_129567_AA0388870,TRIAE_CS42_4DS_TGACv1_362836_AA1182360
GO:0006775	fat-soluble vitamin metabolic process	biological_process	0.001044	0.011247	4	2784	13	74606	TRIAE_CS42_7AL_TGACv1_559693_AA1800520,TRIAE_CS42_7DL_TGACv1_604116_AA1994020,TRIAE_CS42_6AL_TGACv1_471696_AA1513010,TRIAE_CS42_7BL_TGACv1_577849_AA1884560
GO:0010189	vitamin E biosynthetic process	biological_process	0.001044	0.011247	4	2784	13	74606	TRIAE_CS42_7DL_TGACv1_604116_AA1994020,TRIAE_CS42_6AL_TGACv1_471696_AA1513010,TRIAE_CS42_7BL_TGACv1_577849_AA1884560,TRIAE_CS42_7AL_TGACv1_559693_AA1800520
GO:0042360	vitamin E metabolic process	biological_process	0.001044	0.011247	4	2784	13	74606	TRIAE_CS42_7AL_TGACv1_559693_AA1800520,TRIAE_CS42_7DL_TGACv1_604116_AA1994020,TRIAE_CS42_6AL_TGACv1_471696_AA1513010,TRIAE_CS42_7BL_TGACv1_577849_AA1884560
GO:0042362	fat-soluble vitamin biosynthetic process	biological_process	0.001044	0.011247	4	2784	13	74606	TRIAE_CS42_7BL_TGACv1_577849_AA1884560,TRIAE_CS42_6AL_TGACv1_471696_AA1513010,TRIAE_CS42_7DL_TGACv1_604116_AA1994020,TRIAE_CS42_7AL_TGACv1_559693_AA1800520
GO:0015995	chlorophyll biosynthetic process	biological_process	0.001067	0.011476	7	2784	47	74606	TRIAE_CS42_3B_TGACv1_224606_AA0798680,TRIAE_CS42_2AS_TGACv1_113806_AA0360900,TRIAE_CS42_3DS_TGACv1_273835_AA0933610,TRIAE_CS42_3AS_TGACv1_211390_AA0689620,TRIAE_CS42_3AL_TGACv1_197079_AA0664730,TRIAE_CS42_2BS_TGACv1_146261_AA0460710,TRIAE_CS42_4AL_TGACv1_289727_AA0976030
GO:0035639	purine ribonucleoside triphosphate binding	molecular_function	0.0010742	0.011535	329	2784	8738	74606	TRIAE_CS42_3B_TGACv1_222779_AA0770480,TRIAE_CS42_3B_TGACv1_223611_AA0784530,TRIAE_CS42_U_TGACv1_641245_AA2089540,TRIAE_CS42_7AL_TGACv1_557551_AA1782900,TRIAE_CS42_5DL_TGACv1_433464_AA1413780,TRIAE_CS42_1BL_TGACv1_030850_AA0102280,TRIAE_CS42_6AL_TGACv1_471249_AA1505410,TRIAE_CS42_5DL_TGACv1_433160_AA1404060,TRIAE_CS42_7DL_TGACv1_604164_AA1994640,TRIAE_CS42_3AS_TGACv1_213440_AA0706960,TRIAE_CS42_3D…
GO:0016836	hydro-lyase activity	molecular_function	0.001079	0.011568	16	2784	174	74606	TRIAE_CS42_3AS_TGACv1_210457_AA0672630,TRIAE_CS42_2BS_TGACv1_146384_AA0464010,TRIAE_CS42_5DL_TGACv1_433836_AA1423410,TRIAE_CS42_3DL_TGACv1_253234_AA0893850,TRIAE_CS42_2DS_TGACv1_179678_AA0608530,TRIAE_CS42_5AS_TGACv1_393357_AA1271740,TRIAE_CS42_5DS_TGACv1_457334_AA1485300,TRIAE_CS42_7AL_TGACv1_557898_AA1787490,TRIAE_CS42_5BL_TGACv1_405396_AA1326390,TRIAE_CS42_2BL_TGACv1_131224_AA0424610,TRIAE_CS4…
GO:0008168	methyltransferase activity	molecular_function	0.001089	0.011657	52	2784	920	74606	TRIAE_CS42_1BL_TGACv1_031722_AA0119730,TRIAE_CS42_4DL_TGACv1_343724_AA1138650,TRIAE_CS42_5AL_TGACv1_377389_AA1246440,TRIAE_CS42_3DL_TGACv1_254806_AA0896680,TRIAE_CS42_4AL_TGACv1_288716_AA0956280,TRIAE_CS42_2BS_TGACv1_147141_AA0478610,TRIAE_CS42_4DS_TGACv1_361422_AA1167650,TRIAE_CS42_U_TGACv1_643385_AA2131440,TRIAE_CS42_2DS_TGACv1_177139_AA0566230,TRIAE_CS42_4DS_TGACv1_362865_AA1182430,TRIAE_CS42_…
GO:0009606	tropism	biological_process	0.0011039	0.011798	6	2784	40	74606	TRIAE_CS42_4AL_TGACv1_290294_AA0983690,TRIAE_CS42_4DL_TGACv1_342367_AA1111630,TRIAE_CS42_4AL_TGACv1_289938_AA0979140,TRIAE_CS42_4AS_TGACv1_307317_AA1019370,TRIAE_CS42_4DS_TGACv1_361424_AA1167750,TRIAE_CS42_4BS_TGACv1_330248_AA1106770
GO:0052887	7,9,9'-tricis-neurosporene:quinone oxidoreductase activity	molecular_function	0.0011138	0.011863	2	2784	2	74606	TRIAE_CS42_2AS_TGACv1_112052_AA0328860,TRIAE_CS42_2DS_TGACv1_177352_AA0574250
GO:0009145	purine nucleoside triphosphate biosynthetic process	biological_process	0.0011154	0.011863	12	2784	103	74606	TRIAE_CS42_1AL_TGACv1_002629_AA0043900,TRIAE_CS42_2BL_TGACv1_130381_AA0409970,TRIAE_CS42_1DL_TGACv1_062210_AA0210500,TRIAE_CS42_1DL_TGACv1_061176_AA0187850,TRIAE_CS42_1AL_TGACv1_000051_AA0001340,TRIAE_CS42_2DL_TGACv1_158421_AA0518370,TRIAE_CS42_1BL_TGACv1_030377_AA0088540,TRIAE_CS42_2AL_TGACv1_095324_AA0309650,TRIAE_CS42_4DS_TGACv1_361731_AA1172190,TRIAE_CS42_1AL_TGACv1_000492_AA0013410,TRIAE_CS4…
GO:0009206	purine ribonucleoside triphosphate biosynthetic process	biological_process	0.0011154	0.011863	12	2784	103	74606	TRIAE_CS42_1AL_TGACv1_004040_AA0052320,TRIAE_CS42_1AL_TGACv1_000492_AA0013410,TRIAE_CS42_1BL_TGACv1_031692_AA0118950,TRIAE_CS42_4DS_TGACv1_361731_AA1172190,TRIAE_CS42_2AL_TGACv1_095324_AA0309650,TRIAE_CS42_1AL_TGACv1_000051_AA0001340,TRIAE_CS42_2DL_TGACv1_158421_AA0518370,TRIAE_CS42_1BL_TGACv1_030377_AA0088540,TRIAE_CS42_1DL_TGACv1_062210_AA0210500,TRIAE_CS42_1DL_TGACv1_061176_AA0187850,TRIAE_CS4…
GO:0043174	nucleoside salvage	biological_process	0.0011274	0.011973	4	2784	14	74606	TRIAE_CS42_6BL_TGACv1_499360_AA1579440,TRIAE_CS42_1AS_TGACv1_019145_AA0061580,TRIAE_CS42_6AL_TGACv1_473321_AA1530120,TRIAE_CS42_6DL_TGACv1_526952_AA1695860
GO:0003777	microtubule motor activity	molecular_function	0.0011373	0.012007	13	2784	192	74606	TRIAE_CS42_U_TGACv1_644185_AA2137880,TRIAE_CS42_5BL_TGACv1_405531_AA1329570,TRIAE_CS42_6DS_TGACv1_543809_AA1744320,TRIAE_CS42_3AS_TGACv1_210890_AA0680890,TRIAE_CS42_2BS_TGACv1_147476_AA0483590,TRIAE_CS42_U_TGACv1_641465_AA2095940,TRIAE_CS42_3DS_TGACv1_271717_AA0906460,TRIAE_CS42_2DL_TGACv1_158390_AA0517350,TRIAE_CS42_4BL_TGACv1_321294_AA1058540,TRIAE_CS42_2DL_TGACv1_159064_AA0531650,TRIAE_CS42_7B…
GO:0006928	movement of cell or subcellular component	biological_process	0.0011373	0.012007	13	2784	192	74606	TRIAE_CS42_6DS_TGACv1_543809_AA1744320,TRIAE_CS42_5BL_TGACv1_405531_AA1329570,TRIAE_CS42_U_TGACv1_644185_AA2137880,TRIAE_CS42_2BS_TGACv1_147476_AA0483590,TRIAE_CS42_3AS_TGACv1_210890_AA0680890,TRIAE_CS42_4BL_TGACv1_321294_AA1058540,TRIAE_CS42_2DL_TGACv1_158390_AA0517350,TRIAE_CS42_3DS_TGACv1_271717_AA0906460,TRIAE_CS42_U_TGACv1_641465_AA2095940,TRIAE_CS42_5AL_TGACv1_374243_AA1194880,TRIAE_CS42_7B…
GO:0007018	microtubule-based movement	biological_process	0.0011373	0.012007	13	2784	192	74606	TRIAE_CS42_5DS_TGACv1_457199_AA1483690,TRIAE_CS42_7BS_TGACv1_592050_AA1929210,TRIAE_CS42_5AL_TGACv1_374243_AA1194880,TRIAE_CS42_2DL_TGACv1_159064_AA0531650,TRIAE_CS42_4BL_TGACv1_321294_AA1058540,TRIAE_CS42_2DL_TGACv1_158390_AA0517350,TRIAE_CS42_3DS_TGACv1_271717_AA0906460,TRIAE_CS42_U_TGACv1_641465_AA2095940,TRIAE_CS42_3AS_TGACv1_210890_AA0680890,TRIAE_CS42_2BS_TGACv1_147476_AA0483590,TRIAE_CS42_…
GO:0043036	starch grain	cellular_component	0.0011379	0.012007	4	2784	14	74606	TRIAE_CS42_2BL_TGACv1_131614_AA0429850,TRIAE_CS42_4BS_TGACv1_329631_AA1102810,TRIAE_CS42_5AL_TGACv1_374631_AA1204970,TRIAE_CS42_2AL_TGACv1_093163_AA0273760
GO:0098660	inorganic ion transmembrane transport	biological_process	0.0011432	0.012045	39	2784	658	74606	TRIAE_CS42_1BL_TGACv1_031692_AA0118950,TRIAE_CS42_3DS_TGACv1_272832_AA0925630,TRIAE_CS42_7BL_TGACv1_579063_AA1903600,TRIAE_CS42_1AL_TGACv1_001462_AA0030900,TRIAE_CS42_3DL_TGACv1_249692_AA0854470,TRIAE_CS42_3B_TGACv1_221643_AA0746430,TRIAE_CS42_6BS_TGACv1_514088_AA1654890,TRIAE_CS42_2DL_TGACv1_159040_AA0531140,TRIAE_CS42_2DL_TGACv1_159221_AA0534770,TRIAE_CS42_1AL_TGACv1_000051_AA0001340,TRIAE_CS42…
GO:0006259	DNA metabolic process	biological_process	0.0011623	0.012227	63	2784	1300	74606	TRIAE_CS42_1BL_TGACv1_031783_AA0120520,TRIAE_CS42_3DL_TGACv1_252076_AA0887540,TRIAE_CS42_7AS_TGACv1_570353_AA1834310,TRIAE_CS42_2BL_TGACv1_129976_AA0400820,TRIAE_CS42_5BL_TGACv1_407263_AA1355000,TRIAE_CS42_6DL_TGACv1_526389_AA1681790,TRIAE_CS42_U_TGACv1_641839_AA2105360,TRIAE_CS42_6DL_TGACv1_526369_AA1681040,TRIAE_CS42_7BS_TGACv1_593453_AA1951720,TRIAE_CS42_4BL_TGACv1_320689_AA1046280,TRIAE_CS42_…
GO:0000719	photoreactive repair	biological_process	0.0012245	0.012841	2	2784	2	74606	TRIAE_CS42_7BS_TGACv1_592026_AA1928570,TRIAE_CS42_7DS_TGACv1_622043_AA2031500
GO:0003904	deoxyribodipyrimidine photo-lyase activity	molecular_function	0.0012245	0.012841	2	2784	2	74606	TRIAE_CS42_7BS_TGACv1_592026_AA1928570,TRIAE_CS42_7DS_TGACv1_622043_AA2031500
GO:0016717	oxidoreductase activity, acting on paired donors, with oxidation of a pair of donors resulting in the reduction of molecular oxygen to two molecules of water	molecular_function	0.0012794	0.013396	8	2784	59	74606	TRIAE_CS42_2DS_TGACv1_177865_AA0586270,TRIAE_CS42_3AL_TGACv1_197997_AA0667810,TRIAE_CS42_3DL_TGACv1_249135_AA0839230,TRIAE_CS42_2BL_TGACv1_129564_AA0388780,TRIAE_CS42_4BS_TGACv1_327832_AA1075590,TRIAE_CS42_2AS_TGACv1_112777_AA0345060,TRIAE_CS42_2DS_TGACv1_177309_AA0573080,TRIAE_CS42_2BS_TGACv1_146035_AA0453700
GO:0006636	unsaturated fatty acid biosynthetic process	biological_process	0.0013127	0.013702	3	2784	7	74606	TRIAE_CS42_7AL_TGACv1_559693_AA1800520,TRIAE_CS42_7BL_TGACv1_577849_AA1884560,TRIAE_CS42_7DL_TGACv1_604116_AA1994020
GO:0033559	unsaturated fatty acid metabolic process	biological_process	0.0013127	0.013702	3	2784	7	74606	TRIAE_CS42_7DL_TGACv1_604116_AA1994020,TRIAE_CS42_7BL_TGACv1_577849_AA1884560,TRIAE_CS42_7AL_TGACv1_559693_AA1800520
GO:0070734	histone H3-K27 methylation	biological_process	0.0013531	0.014102	4	2784	15	74606	TRIAE_CS42_7BL_TGACv1_578034_AA1888270,TRIAE_CS42_5BL_TGACv1_405283_AA1324030,TRIAE_CS42_U_TGACv1_643385_AA2131440,TRIAE_CS42_5DL_TGACv1_435922_AA1456290
GO:0080037	negative regulation of cytokinin-activated signaling pathway	biological_process	0.0013889	0.014452	3	2784	6	74606	TRIAE_CS42_U_TGACv1_640854_AA2077410,TRIAE_CS42_7BS_TGACv1_591976_AA1927160,TRIAE_CS42_7DS_TGACv1_623153_AA2050180
GO:0008830	dTDP-4-dehydrorhamnose 3,5-epimerase activity	molecular_function	0.0014108	0.014545	2	2784	2	74606	TRIAE_CS42_6AL_TGACv1_473897_AA1533380,TRIAE_CS42_6DL_TGACv1_528145_AA1711960
GO:0008831	dTDP-4-dehydrorhamnose reductase activity	molecular_function	0.0014108	0.014545	2	2784	2	74606	TRIAE_CS42_6AL_TGACv1_473897_AA1533380,TRIAE_CS42_6DL_TGACv1_528145_AA1711960
GO:0010253	UDP-rhamnose biosynthetic process	biological_process	0.0014108	0.014545	2	2784	2	74606	TRIAE_CS42_6AL_TGACv1_473897_AA1533380,TRIAE_CS42_6DL_TGACv1_528145_AA1711960
GO:0019305	dTDP-rhamnose biosynthetic process	biological_process	0.0014108	0.014545	2	2784	2	74606	TRIAE_CS42_6AL_TGACv1_473897_AA1533380,TRIAE_CS42_6DL_TGACv1_528145_AA1711960
GO:0033478	UDP-rhamnose metabolic process	biological_process	0.0014108	0.014545	2	2784	2	74606	TRIAE_CS42_6DL_TGACv1_528145_AA1711960,TRIAE_CS42_6AL_TGACv1_473897_AA1533380
GO:0046383	dTDP-rhamnose metabolic process	biological_process	0.0014108	0.014545	2	2784	2	74606	TRIAE_CS42_6DL_TGACv1_528145_AA1711960,TRIAE_CS42_6AL_TGACv1_473897_AA1533380
GO:0004337	geranyltranstransferase activity	molecular_function	0.0014254	0.014673	3	2784	7	74606	TRIAE_CS42_1BL_TGACv1_031194_AA0109500,TRIAE_CS42_1AL_TGACv1_002642_AA0044130,TRIAE_CS42_1DL_TGACv1_061444_AA0195450
GO:0004069	L-aspartate:2-oxoglutarate aminotransferase activity	molecular_function	0.0014637	0.015028	4	2784	15	74606	TRIAE_CS42_7BL_TGACv1_581547_AA1917420,TRIAE_CS42_6AS_TGACv1_487104_AA1568170,TRIAE_CS42_6BS_TGACv1_513449_AA1641870,TRIAE_CS42_6DS_TGACv1_543365_AA1739120
GO:0032259	methylation	biological_process	0.0014643	0.015028	55	2784	1005	74606	TRIAE_CS42_4DL_TGACv1_343724_AA1138650,TRIAE_CS42_1BL_TGACv1_031722_AA0119730,TRIAE_CS42_4AL_TGACv1_288716_AA0956280,TRIAE_CS42_2BS_TGACv1_147141_AA0478610,TRIAE_CS42_4DS_TGACv1_361422_AA1167650,TRIAE_CS42_3DL_TGACv1_254806_AA0896680,TRIAE_CS42_5AL_TGACv1_377389_AA1246440,TRIAE_CS42_U_TGACv1_643385_AA2131440,TRIAE_CS42_4DS_TGACv1_362865_AA1182430,TRIAE_CS42_2DS_TGACv1_177139_AA0566230,TRIAE_CS42_…
GO:0016119	carotene metabolic process	biological_process	0.0014795	0.015136	4	2784	15	74606	TRIAE_CS42_2BS_TGACv1_146261_AA0460710,TRIAE_CS42_2AS_TGACv1_112052_AA0328860,TRIAE_CS42_2DS_TGACv1_177352_AA0574250,TRIAE_CS42_2BS_TGACv1_145984_AA0451870
GO:0009106	lipoate metabolic process	biological_process	0.0014862	0.015136	3	2784	7	74606	TRIAE_CS42_1DL_TGACv1_061125_AA0186220,TRIAE_CS42_1BL_TGACv1_030654_AA0097000,TRIAE_CS42_1AL_TGACv1_000132_AA0004290
GO:0009107	lipoate biosynthetic process	biological_process	0.0014862	0.015136	3	2784	7	74606	TRIAE_CS42_1DL_TGACv1_061125_AA0186220,TRIAE_CS42_1AL_TGACv1_000132_AA0004290,TRIAE_CS42_1BL_TGACv1_030654_AA0097000
GO:0016979	lipoate-protein ligase activity	molecular_function	0.0014862	0.015136	3	2784	7	74606	TRIAE_CS42_1AL_TGACv1_000132_AA0004290,TRIAE_CS42_1BL_TGACv1_030654_AA0097000,TRIAE_CS42_1DL_TGACv1_061125_AA0186220
GO:0016992	lipoate synthase activity	molecular_function	0.0014862	0.015136	3	2784	7	74606	TRIAE_CS42_1DL_TGACv1_061125_AA0186220,TRIAE_CS42_1AL_TGACv1_000132_AA0004290,TRIAE_CS42_1BL_TGACv1_030654_AA0097000
GO:0016774	phosphotransferase activity, carboxyl group as acceptor	molecular_function	0.001504	0.015295	6	2784	36	74606	TRIAE_CS42_1AL_TGACv1_000254_AA0007380,TRIAE_CS42_6BS_TGACv1_513938_AA1652520,TRIAE_CS42_U_TGACv1_641432_AA2094970,TRIAE_CS42_6AS_TGACv1_486236_AA1558630,TRIAE_CS42_5BL_TGACv1_404321_AA1295470,TRIAE_CS42_3B_TGACv1_225182_AA0805900
GO:0015631	tubulin binding	molecular_function	0.001533	0.015566	20	2784	332	74606	TRIAE_CS42_1BL_TGACv1_030549_AA0093760,TRIAE_CS42_1AL_TGACv1_000051_AA0001350,TRIAE_CS42_U_TGACv1_641465_AA2095940,TRIAE_CS42_1DL_TGACv1_062210_AA0210520,TRIAE_CS42_3DL_TGACv1_249363_AA0846610,TRIAE_CS42_5DS_TGACv1_457199_AA1483690,TRIAE_CS42_2DL_TGACv1_159064_AA0531650,TRIAE_CS42_6DS_TGACv1_543809_AA1744320,TRIAE_CS42_3AS_TGACv1_210890_AA0680890,TRIAE_CS42_2BS_TGACv1_147476_AA0483590,TRIAE_CS42_…
GO:0004619	phosphoglycerate mutase activity	molecular_function	0.0015481	0.015696	4	2784	15	74606	TRIAE_CS42_3DL_TGACv1_251020_AA0876220,TRIAE_CS42_5AS_TGACv1_395024_AA1282460,TRIAE_CS42_3AL_TGACv1_196039_AA0656760,TRIAE_CS42_3B_TGACv1_222141_AA0758150
GO:0015923	mannosidase activity	molecular_function	0.0016337	0.016539	5	2784	29	74606	TRIAE_CS42_1DS_TGACv1_080723_AA0252750,TRIAE_CS42_3B_TGACv1_221138_AA0731590,TRIAE_CS42_6AL_TGACv1_472781_AA1525920,TRIAE_CS42_6DL_TGACv1_526986_AA1696660,TRIAE_CS42_6BL_TGACv1_501865_AA1621140
GO:0022890	inorganic cation transmembrane transporter activity	molecular_function	0.001653	0.016709	39	2784	661	74606	TRIAE_CS42_2AL_TGACv1_094766_AA0302860,TRIAE_CS42_U_TGACv1_642696_AA2121820,TRIAE_CS42_2AL_TGACv1_093051_AA0270470,TRIAE_CS42_4BS_TGACv1_328956_AA1096140,TRIAE_CS42_5BL_TGACv1_406546_AA1346870,TRIAE_CS42_7DL_TGACv1_603800_AA1989460,TRIAE_CS42_2AL_TGACv1_095324_AA0309650,TRIAE_CS42_6BL_TGACv1_501539_AA1618480,TRIAE_CS42_7AL_TGACv1_559344_AA1799200,TRIAE_CS42_5DL_TGACv1_436184_AA1459030,TRIAE_CS42_…
GO:0061087	positive regulation of histone H3-K27 methylation	biological_process	0.0016645	0.0168	2	2784	3	74606	TRIAE_CS42_5BL_TGACv1_405283_AA1324030,TRIAE_CS42_5DL_TGACv1_435922_AA1456290
GO:0003779	actin binding	molecular_function	0.00169	0.017032	16	2784	205	74606	TRIAE_CS42_3DS_TGACv1_271667_AA0905120,TRIAE_CS42_1BS_TGACv1_051077_AA0177630,TRIAE_CS42_1BS_TGACv1_049965_AA0164830,TRIAE_CS42_5DL_TGACv1_433323_AA1409740,TRIAE_CS42_7DS_TGACv1_621620_AA2021340,TRIAE_CS42_3AL_TGACv1_194109_AA0626680,TRIAE_CS42_7AS_TGACv1_569480_AA1817080,TRIAE_CS42_4DL_TGACv1_342367_AA1111630,TRIAE_CS42_5AL_TGACv1_375015_AA1213980,TRIAE_CS42_5DL_TGACv1_433016_AA1398230,TRIAE_CS4…
GO:0032432	actin filament bundle	cellular_component	0.0017055	0.017136	2	2784	3	74606	TRIAE_CS42_4DL_TGACv1_342367_AA1111630,TRIAE_CS42_4AS_TGACv1_307317_AA1019370
GO:0051014	actin filament severing	biological_process	0.0017055	0.017136	2	2784	3	74606	TRIAE_CS42_4AS_TGACv1_307317_AA1019370,TRIAE_CS42_4DL_TGACv1_342367_AA1111630
GO:0008017	microtubule binding	molecular_function	0.0017605	0.017662	18	2784	296	74606	TRIAE_CS42_6DS_TGACv1_543809_AA1744320,TRIAE_CS42_3AS_TGACv1_210890_AA0680890,TRIAE_CS42_2BS_TGACv1_147476_AA0483590,TRIAE_CS42_1BL_TGACv1_030549_AA0093760,TRIAE_CS42_1AL_TGACv1_000051_AA0001350,TRIAE_CS42_U_TGACv1_641465_AA2095940,TRIAE_CS42_1DL_TGACv1_062210_AA0210520,TRIAE_CS42_3DL_TGACv1_249363_AA0846610,TRIAE_CS42_5DS_TGACv1_457199_AA1483690,TRIAE_CS42_2DL_TGACv1_159064_AA0531650,TRIAE_CS42_…
GO:0071941	nitrogen cycle metabolic process	biological_process	0.0017866	0.017898	4	2784	18	74606	TRIAE_CS42_6AS_TGACv1_486190_AA1557980,TRIAE_CS42_6DS_TGACv1_543770_AA1744010,TRIAE_CS42_7DS_TGACv1_622272_AA2036850,TRIAE_CS42_7AS_TGACv1_569986_AA1828160
GO:0016109	tetraterpenoid biosynthetic process	biological_process	0.0018208	0.018186	6	2784	37	74606	TRIAE_CS42_4AL_TGACv1_289727_AA0976030,TRIAE_CS42_2BS_TGACv1_146261_AA0460710,TRIAE_CS42_2AS_TGACv1_112052_AA0328860,TRIAE_CS42_3AS_TGACv1_210696_AA0677310,TRIAE_CS42_2DS_TGACv1_177352_AA0574250,TRIAE_CS42_2BS_TGACv1_145984_AA0451870
GO:0016117	carotenoid biosynthetic process	biological_process	0.0018208	0.018186	6	2784	37	74606	TRIAE_CS42_4AL_TGACv1_289727_AA0976030,TRIAE_CS42_2BS_TGACv1_146261_AA0460710,TRIAE_CS42_2AS_TGACv1_112052_AA0328860,TRIAE_CS42_3AS_TGACv1_210696_AA0677310,TRIAE_CS42_2DS_TGACv1_177352_AA0574250,TRIAE_CS42_2BS_TGACv1_145984_AA0451870
GO:0048856	anatomical structure development	biological_process	0.0018385	0.018336	69	2784	1368	74606	TRIAE_CS42_7BS_TGACv1_591976_AA1927160,TRIAE_CS42_7BL_TGACv1_578034_AA1888270,TRIAE_CS42_7BL_TGACv1_579004_AA1902920,TRIAE_CS42_7AS_TGACv1_570244_AA1832810,TRIAE_CS42_1BS_TGACv1_049652_AA0158940,TRIAE_CS42_U_TGACv1_642463_AA2118090,TRIAE_CS42_4DL_TGACv1_344347_AA1146290,TRIAE_CS42_4AL_TGACv1_289752_AA0976330,TRIAE_CS42_1DL_TGACv1_062985_AA0222610,TRIAE_CS42_2AS_TGACv1_113039_AA0350300,TRIAE_CS42_…
GO:0005977	glycogen metabolic process	biological_process	0.0018444	0.01834	6	2784	43	74606	TRIAE_CS42_2DS_TGACv1_177436_AA0577070,TRIAE_CS42_1BL_TGACv1_031712_AA0119450,TRIAE_CS42_2BS_TGACv1_148740_AA0494910,TRIAE_CS42_5DL_TGACv1_435303_AA1448600,TRIAE_CS42_2AS_TGACv1_112747_AA0344470,TRIAE_CS42_7AL_TGACv1_556597_AA1766600
GO:0006112	energy reserve metabolic process	biological_process	0.0018444	0.01834	6	2784	43	74606	TRIAE_CS42_1BL_TGACv1_031712_AA0119450,TRIAE_CS42_2BS_TGACv1_148740_AA0494910,TRIAE_CS42_5DL_TGACv1_435303_AA1448600,TRIAE_CS42_2DS_TGACv1_177436_AA0577070,TRIAE_CS42_7AL_TGACv1_556597_AA1766600,TRIAE_CS42_2AS_TGACv1_112747_AA0344470
GO:0003006	developmental process involved in reproduction	biological_process	0.0018472	0.018341	43	2784	765	74606	TRIAE_CS42_4DL_TGACv1_345404_AA1153060,TRIAE_CS42_3DL_TGACv1_251216_AA0878910,TRIAE_CS42_5DS_TGACv1_458693_AA1494370,TRIAE_CS42_7AS_TGACv1_570244_AA1832810,TRIAE_CS42_2DL_TGACv1_158851_AA0527100,TRIAE_CS42_3DL_TGACv1_250864_AA0874390,TRIAE_CS42_1AL_TGACv1_001119_AA0025400,TRIAE_CS42_1DL_TGACv1_061584_AA0199150,TRIAE_CS42_7BL_TGACv1_578034_AA1888270,TRIAE_CS42_6DS_TGACv1_543504_AA1740860,TRIAE_CS4…
GO:0030042	actin filament depolymerization	biological_process	0.001877	0.018609	7	2784	41	74606	TRIAE_CS42_5DL_TGACv1_433323_AA1409740,TRIAE_CS42_5AL_TGACv1_375015_AA1213980,TRIAE_CS42_5DL_TGACv1_433016_AA1398230,TRIAE_CS42_5BL_TGACv1_406522_AA1346490,TRIAE_CS42_1BS_TGACv1_049965_AA0164830,TRIAE_CS42_4AS_TGACv1_307317_AA1019370,TRIAE_CS42_4DL_TGACv1_342367_AA1111630
GO:0010287	plastoglobule	cellular_component	0.0018926	0.018737	8	2784	58	74606	TRIAE_CS42_2DS_TGACv1_177169_AA0567350,TRIAE_CS42_2BL_TGACv1_129619_AA0390730,TRIAE_CS42_1BL_TGACv1_033050_AA0136470,TRIAE_CS42_6DL_TGACv1_527097_AA1698520,TRIAE_CS42_1DL_TGACv1_062706_AA0218480,TRIAE_CS42_3AS_TGACv1_212176_AA0698420,TRIAE_CS42_4AL_TGACv1_289727_AA0976030,TRIAE_CS42_3DS_TGACv1_271872_AA0909840
GO:0061024	membrane organization	biological_process	0.0019148	0.018928	20	2784	276	74606	TRIAE_CS42_3B_TGACv1_220835_AA0720860,TRIAE_CS42_4AS_TGACv1_306421_AA1007900,TRIAE_CS42_1DS_TGACv1_082951_AA0265140,TRIAE_CS42_5DL_TGACv1_433822_AA1423010,TRIAE_CS42_5BL_TGACv1_404121_AA1284890,TRIAE_CS42_4AL_TGACv1_288747_AA0957130,TRIAE_CS42_5DL_TGACv1_434221_AA1432010,TRIAE_CS42_3AL_TGACv1_194328_AA0631110,TRIAE_CS42_4DS_TGACv1_362497_AA1180110,TRIAE_CS42_3DL_TGACv1_249227_AA0842370,TRIAE_CS42…
GO:0032403	protein complex binding	molecular_function	0.0019336	0.019086	23	2784	401	74606	TRIAE_CS42_3AL_TGACv1_194824_AA0640140,TRIAE_CS42_5AL_TGACv1_374243_AA1194880,TRIAE_CS42_7BS_TGACv1_592050_AA1929210,TRIAE_CS42_3AL_TGACv1_196532_AA0661150,TRIAE_CS42_2DL_TGACv1_158390_AA0517350,TRIAE_CS42_4BL_TGACv1_321294_AA1058540,TRIAE_CS42_4AS_TGACv1_307317_AA1019370,TRIAE_CS42_1BL_TGACv1_030553_AA0093880,TRIAE_CS42_6AL_TGACv1_471163_AA1503860,TRIAE_CS42_U_TGACv1_644185_AA2137880,TRIAE_CS42_…
GO:0071949	FAD binding	molecular_function	0.0019574	0.019293	8	2784	67	74606	TRIAE_CS42_7DS_TGACv1_622043_AA2031500,TRIAE_CS42_3DS_TGACv1_273835_AA0933610,TRIAE_CS42_7BS_TGACv1_592026_AA1928570,TRIAE_CS42_4DS_TGACv1_361731_AA1172170,TRIAE_CS42_7AL_TGACv1_556096_AA1755360,TRIAE_CS42_3AS_TGACv1_211390_AA0689620,TRIAE_CS42_U_TGACv1_643410_AA2131740,TRIAE_CS42_3B_TGACv1_224606_AA0798680
GO:0002683	negative regulation of immune system process	biological_process	0.0019617	0.019307	4	2784	16	74606	TRIAE_CS42_1DL_TGACv1_062362_AA0213270,TRIAE_CS42_1AL_TGACv1_002853_AA0045580,TRIAE_CS42_7BL_TGACv1_578034_AA1888270,TRIAE_CS42_1BL_TGACv1_030567_AA0094200
GO:0044237	cellular metabolic process	biological_process	0.0020118	0.01977	941	2784	23729	74606	TRIAE_CS42_6DL_TGACv1_526566_AA1687250,TRIAE_CS42_4AS_TGACv1_306509_AA1009420,TRIAE_CS42_5DS_TGACv1_458111_AA1492100,TRIAE_CS42_3DL_TGACv1_250081_AA0861870,TRIAE_CS42_5DL_TGACv1_432935_AA1395050,TRIAE_CS42_6BS_TGACv1_514827_AA1664770,TRIAE_CS42_6DS_TGACv1_544326_AA1747750,TRIAE_CS42_2AL_TGACv1_093532_AA0281910,TRIAE_CS42_1BL_TGACv1_032695_AA0133030,TRIAE_CS42_2BS_TGACv1_146261_AA0460710,TRIAE_CS4…
ACv1_113806_AA0360900,TRIAE_CS42_5BL_TGACv1_406061_AA1340040,TRIAE_CS42_3B_TGACv1_222610_AA0767770,TRIAE_CS42_2BS_TGACv1_146926_AA0475500,TRIAE_CS42_5DL_TGACv1_433267_AA1407590,TRIAE_CS42_7AS_TGACv1_570040_AA1829250,TRIAE_CS42_4AL_TGACv1_288750_AA0957210,TRIAE_CS42_2AS_TGACv1_112674_AA0343230,TRIAE_CS42_1BL_TGACv1_031443_AA0114190,TRIAE_CS42_4DL_TGACv1_343812_AA1140000,TRIAE_CS42_4AS_TGACv1_30736…
GO:0008135	translation factor activity, RNA binding	molecular_function	0.0020174	0.01977	20	2784	257	74606	TRIAE_CS42_6BL_TGACv1_502287_AA1624100,TRIAE_CS42_6AL_TGACv1_472657_AA1524540,TRIAE_CS42_5BL_TGACv1_405701_AA1333330,TRIAE_CS42_4BL_TGACv1_320636_AA1045250,TRIAE_CS42_6AS_TGACv1_486894_AA1566280,TRIAE_CS42_2BS_TGACv1_147477_AA0483610,TRIAE_CS42_5AL_TGACv1_374249_AA1195140,TRIAE_CS42_4DS_TGACv1_362664_AA1181310,TRIAE_CS42_1BL_TGACv1_031553_AA0115960,TRIAE_CS42_5DL_TGACv1_435150_AA1446750,TRIAE_CS4…
GO:0098798	mitochondrial protein complex	cellular_component	0.0020176	0.01977	15	2784	132	74606	TRIAE_CS42_3AL_TGACv1_194730_AA0638300,TRIAE_CS42_7AL_TGACv1_556856_AA1772180,TRIAE_CS42_1BL_TGACv1_031692_AA0118950,TRIAE_CS42_4BS_TGACv1_329474_AA1101780,TRIAE_CS42_4AL_TGACv1_288275_AA0943380,TRIAE_CS42_U_TGACv1_641717_AA2102380,TRIAE_CS42_2AL_TGACv1_095324_AA0309650,TRIAE_CS42_1AL_TGACv1_000051_AA0001340,TRIAE_CS42_2DL_TGACv1_158421_AA0518370,TRIAE_CS42_1DL_TGACv1_062210_AA0210500,TRIAE_CS42_…
GO:0051261	protein depolymerization	biological_process	0.0020256	0.01982	7	2784	42	74606	TRIAE_CS42_4DL_TGACv1_342367_AA1111630,TRIAE_CS42_4AS_TGACv1_307317_AA1019370,TRIAE_CS42_1BS_TGACv1_049965_AA0164830,TRIAE_CS42_5DL_TGACv1_433016_AA1398230,TRIAE_CS42_5AL_TGACv1_375015_AA1213980,TRIAE_CS42_5BL_TGACv1_406522_AA1346490,TRIAE_CS42_5DL_TGACv1_433323_AA1409740
GO:0016114	terpenoid biosynthetic process	biological_process	0.0020737	0.02026	9	2784	81	74606	TRIAE_CS42_2DS_TGACv1_177352_AA0574250,TRIAE_CS42_5DL_TGACv1_434775_AA1441440,TRIAE_CS42_2BS_TGACv1_145984_AA0451870,TRIAE_CS42_4AL_TGACv1_289727_AA0976030,TRIAE_CS42_2AS_TGACv1_112052_AA0328860,TRIAE_CS42_3AS_TGACv1_210696_AA0677310,TRIAE_CS42_6DL_TGACv1_527093_AA1698360,TRIAE_CS42_6BL_TGACv1_501657_AA1619680,TRIAE_CS42_2BS_TGACv1_146261_AA0460710
GO:0051539	4 iron, 4 sulfur cluster binding	molecular_function	0.0020897	0.020347	10	2784	100	74606	AIG90478,TRIAE_CS42_2BL_TGACv1_129976_AA0400820,TRIAE_CS42_1AL_TGACv1_000132_AA0004290,TRIAE_CS42_2AL_TGACv1_094809_AA0303420,TRIAE_CS42_1AL_TGACv1_001652_AA0033600,TRIAE_CS42_7BS_TGACv1_592934_AA1946410,TRIAE_CS42_1DL_TGACv1_061125_AA0186220,TRIAE_CS42_1DL_TGACv1_061476_AA0196370,TRIAE_CS42_1BL_TGACv1_030654_AA0097000,TRIAE_CS42_2DL_TGACv1_161360_AA0558180
GO:0004470	malic enzyme activity	molecular_function	0.0020916	0.020347	4	2784	17	74606	TRIAE_CS42_1DL_TGACv1_062583_AA0216850,TRIAE_CS42_1AL_TGACv1_000369_AA0010430,TRIAE_CS42_1BL_TGACv1_030411_AA0089860,TRIAE_CS42_2AS_TGACv1_112185_AA0332560
GO:0004471	malate dehydrogenase (decarboxylating) (NAD+) activity	molecular_function	0.0020916	0.020347	4	2784	17	74606	TRIAE_CS42_2AS_TGACv1_112185_AA0332560,TRIAE_CS42_1BL_TGACv1_030411_AA0089860,TRIAE_CS42_1AL_TGACv1_000369_AA0010430,TRIAE_CS42_1DL_TGACv1_062583_AA0216850
GO:0006544	glycine metabolic process	biological_process	0.0021689	0.021069	5	2784	26	74606	TRIAE_CS42_2DL_TGACv1_159916_AA0544360,TRIAE_CS42_2AL_TGACv1_094077_AA0292210,TRIAE_CS42_2BL_TGACv1_129567_AA0388870,TRIAE_CS42_4DS_TGACv1_362836_AA1182360,TRIAE_CS42_6AS_TGACv1_485264_AA1542040
GO:0015672	monovalent inorganic cation transport	biological_process	0.0021884	0.021227	32	2784	517	74606	TRIAE_CS42_3B_TGACv1_221643_AA0746430,TRIAE_CS42_6BS_TGACv1_514088_AA1654890,TRIAE_CS42_7DS_TGACv1_623756_AA2055850,TRIAE_CS42_1AL_TGACv1_001462_AA0030900,TRIAE_CS42_2DL_TGACv1_158421_AA0518370,TRIAE_CS42_1AL_TGACv1_000051_AA0001340,TRIAE_CS42_5DL_TGACv1_434833_AA1442310,TRIAE_CS42_1DL_TGACv1_062210_AA0210500,TRIAE_CS42_3DS_TGACv1_272407_AA0920320,TRIAE_CS42_3AL_TGACv1_194690_AA0637900,TRIAE_CS42…
GO:1990542	mitochondrial transmembrane transport	biological_process	0.0021971	0.021281	6	2784	31	74606	TRIAE_CS42_3B_TGACv1_223525_AA0783520,TRIAE_CS42_4DL_TGACv1_343137_AA1130350,TRIAE_CS42_3B_TGACv1_223093_AA0776380,TRIAE_CS42_4BL_TGACv1_321242_AA1057770,TRIAE_CS42_4AS_TGACv1_307078_AA1016740,TRIAE_CS42_3AL_TGACv1_194730_AA0638300
GO:0015711	organic anion transport	biological_process	0.0022074	0.021302	18	2784	238	74606	TRIAE_CS42_4DS_TGACv1_361391_AA1166860,TRIAE_CS42_1BL_TGACv1_031047_AA0106660,TRIAE_CS42_4DL_TGACv1_343039_AA1128130,TRIAE_CS42_4BL_TGACv1_320288_AA1034040,TRIAE_CS42_2BS_TGACv1_146815_AA0473320,TRIAE_CS42_3B_TGACv1_225155_AA0805550,TRIAE_CS42_7BL_TGACv1_577333_AA1872500,TRIAE_CS42_U_TGACv1_643424_AA2131910,TRIAE_CS42_4BS_TGACv1_329699_AA1103360,TRIAE_CS42_U_TGACv1_644844_AA2141960,TRIAE_CS42_2DL…
GO:0030029	actin filament-based process	biological_process	0.0022088	0.021302	13	2784	145	74606	TRIAE_CS42_4DL_TGACv1_342367_AA1111630,TRIAE_CS42_2DS_TGACv1_177373_AA0574960,TRIAE_CS42_5BL_TGACv1_406522_AA1346490,TRIAE_CS42_1BS_TGACv1_051077_AA0177630,TRIAE_CS42_5DL_TGACv1_433016_AA1398230,TRIAE_CS42_5AL_TGACv1_375015_AA1213980,TRIAE_CS42_3DS_TGACv1_271667_AA0905120,TRIAE_CS42_2AS_TGACv1_113582_AA0358210,TRIAE_CS42_1BS_TGACv1_049965_AA0164830,TRIAE_CS42_4AS_TGACv1_307317_AA1019370,TRIAE_CS4…
GO:0030036	actin cytoskeleton organization	biological_process	0.0022088	0.021302	13	2784	145	74606	TRIAE_CS42_5DL_TGACv1_433016_AA1398230,TRIAE_CS42_5AL_TGACv1_375015_AA1213980,TRIAE_CS42_5BL_TGACv1_406522_AA1346490,TRIAE_CS42_1BS_TGACv1_051077_AA0177630,TRIAE_CS42_3DS_TGACv1_271667_AA0905120,TRIAE_CS42_4DL_TGACv1_342367_AA1111630,TRIAE_CS42_2DS_TGACv1_177373_AA0574960,TRIAE_CS42_3AL_TGACv1_194109_AA0626680,TRIAE_CS42_5DL_TGACv1_433323_AA1409740,TRIAE_CS42_3AL_TGACv1_194824_AA0640140,TRIAE_CS4…
GO:0000276	mitochondrial proton-transporting ATP synthase complex, coupling factor F(o)	cellular_component	0.0022193	0.021338	4	2784	12	74606	TRIAE_CS42_2AL_TGACv1_095324_AA0309650,TRIAE_CS42_2DL_TGACv1_158421_AA0518370,TRIAE_CS42_2BL_TGACv1_130381_AA0409970,TRIAE_CS42_1AL_TGACv1_002629_AA0043900
GO:0015849	organic acid transport	biological_process	0.0022221	0.021338	15	2784	177	74606	TRIAE_CS42_4AL_TGACv1_289623_AA0974220,TRIAE_CS42_3B_TGACv1_223199_AA0777850,TRIAE_CS42_3B_TGACv1_225155_AA0805550,TRIAE_CS42_1DL_TGACv1_062818_AA0220440,TRIAE_CS42_7BL_TGACv1_577333_AA1872500,TRIAE_CS42_3DS_TGACv1_271874_AA0909920,TRIAE_CS42_5AL_TGACv1_374188_AA1192880,TRIAE_CS42_5DL_TGACv1_432946_AA1395680,TRIAE_CS42_5BL_TGACv1_405907_AA1337450,TRIAE_CS42_4DS_TGACv1_361391_AA1166860,TRIAE_CS42_…
GO:0046942	carboxylic acid transport	biological_process	0.0022221	0.021338	15	2784	177	74606	TRIAE_CS42_4BL_TGACv1_320288_AA1034040,TRIAE_CS42_2DL_TGACv1_159701_AA0541660,TRIAE_CS42_2BS_TGACv1_146815_AA0473320,TRIAE_CS42_4DL_TGACv1_343039_AA1128130,TRIAE_CS42_4DS_TGACv1_361391_AA1166860,TRIAE_CS42_4BS_TGACv1_329699_AA1103360,TRIAE_CS42_3DS_TGACv1_271874_AA0909920,TRIAE_CS42_5AL_TGACv1_374188_AA1192880,TRIAE_CS42_5DL_TGACv1_432946_AA1395680,TRIAE_CS42_7BL_TGACv1_577333_AA1872500,TRIAE_CS4…
GO:0006213	pyrimidine nucleoside metabolic process	biological_process	0.0022647	0.021686	7	2784	50	74606	TRIAE_CS42_1DL_TGACv1_061176_AA0187850,TRIAE_CS42_3DL_TGACv1_249279_AA0843940,TRIAE_CS42_4DS_TGACv1_361731_AA1172190,TRIAE_CS42_3AL_TGACv1_194109_AA0626660,TRIAE_CS42_3B_TGACv1_223258_AA0779170,TRIAE_CS42_1AL_TGACv1_000492_AA0013410,TRIAE_CS42_1BL_TGACv1_030377_AA0088540
GO:0046131	pyrimidine ribonucleoside metabolic process	biological_process	0.0022647	0.021686	7	2784	50	74606	TRIAE_CS42_4DS_TGACv1_361731_AA1172190,TRIAE_CS42_3DL_TGACv1_249279_AA0843940,TRIAE_CS42_3AL_TGACv1_194109_AA0626660,TRIAE_CS42_3B_TGACv1_223258_AA0779170,TRIAE_CS42_1BL_TGACv1_030377_AA0088540,TRIAE_CS42_1AL_TGACv1_000492_AA0013410,TRIAE_CS42_1DL_TGACv1_061176_AA0187850
GO:0006694	steroid biosynthetic process	biological_process	0.0022853	0.021828	9	2784	77	74606	TRIAE_CS42_4BL_TGACv1_320400_AA1037850,TRIAE_CS42_7BS_TGACv1_591893_AA1924780,TRIAE_CS42_5AL_TGACv1_378173_AA1251720,TRIAE_CS42_5AL_TGACv1_377389_AA1246440,TRIAE_CS42_4DL_TGACv1_343496_AA1135330,TRIAE_CS42_4DS_TGACv1_361422_AA1167650,TRIAE_CS42_3AL_TGACv1_194203_AA0628440,TRIAE_CS42_4AS_TGACv1_308060_AA1025550,TRIAE_CS42_4DL_TGACv1_343724_AA1138650
GO:0006561	proline biosynthetic process	biological_process	0.002286	0.021828	4	2784	16	74606	TRIAE_CS42_1AL_TGACv1_000254_AA0007380,TRIAE_CS42_5DL_TGACv1_434775_AA1441440,TRIAE_CS42_1AL_TGACv1_000254_AA0007370,TRIAE_CS42_3B_TGACv1_225182_AA0805900
GO:0061085	regulation of histone H3-K27 methylation	biological_process	0.0023009	0.021938	3	2784	9	74606	TRIAE_CS42_7BL_TGACv1_578034_AA1888270,TRIAE_CS42_5BL_TGACv1_405283_AA1324030,TRIAE_CS42_5DL_TGACv1_435922_AA1456290
GO:0006760	folic acid-containing compound metabolic process	biological_process	0.0023098	0.021993	7	2784	50	74606	TRIAE_CS42_5BL_TGACv1_406345_AA1344380,TRIAE_CS42_2DL_TGACv1_159916_AA0544360,TRIAE_CS42_5AL_TGACv1_374680_AA1206310,TRIAE_CS42_2BL_TGACv1_129567_AA0388870,TRIAE_CS42_2AL_TGACv1_094077_AA0292210,TRIAE_CS42_4DS_TGACv1_362836_AA1182360,TRIAE_CS42_1BL_TGACv1_030850_AA0102280
GO:0051052	regulation of DNA metabolic process	biological_process	0.0023354	0.022204	9	2784	82	74606	TRIAE_CS42_4BL_TGACv1_321351_AA1059370,TRIAE_CS42_6BL_TGACv1_500113_AA1599290,TRIAE_CS42_6DL_TGACv1_526389_AA1681790,TRIAE_CS42_U_TGACv1_643385_AA2131440,TRIAE_CS42_6AL_TGACv1_473573_AA1531820,TRIAE_CS42_2BL_TGACv1_131506_AA0428640,TRIAE_CS42_1AS_TGACv1_019932_AA0072990,TRIAE_CS42_2DL_TGACv1_159200_AA0534260,TRIAE_CS42_2AL_TGACv1_096359_AA0318830
GO:0004550	nucleoside diphosphate kinase activity	molecular_function	0.0024002	0.02266	4	2784	14	74606	TRIAE_CS42_4DS_TGACv1_361731_AA1172190,TRIAE_CS42_1AL_TGACv1_000492_AA0013410,TRIAE_CS42_1BL_TGACv1_030377_AA0088540,TRIAE_CS42_1DL_TGACv1_061176_AA0187850
GO:0006183	GTP biosynthetic process	biological_process	0.0024002	0.02266	4	2784	14	74606	TRIAE_CS42_4DS_TGACv1_361731_AA1172190,TRIAE_CS42_1AL_TGACv1_000492_AA0013410,TRIAE_CS42_1BL_TGACv1_030377_AA0088540,TRIAE_CS42_1DL_TGACv1_061176_AA0187850
GO:0006228	UTP biosynthetic process	biological_process	0.0024002	0.02266	4	2784	14	74606	TRIAE_CS42_1DL_TGACv1_061176_AA0187850,TRIAE_CS42_4DS_TGACv1_361731_AA1172190,TRIAE_CS42_1BL_TGACv1_030377_AA0088540,TRIAE_CS42_1AL_TGACv1_000492_AA0013410
GO:0046039	GTP metabolic process	biological_process	0.0024002	0.02266	4	2784	14	74606	TRIAE_CS42_4DS_TGACv1_361731_AA1172190,TRIAE_CS42_1BL_TGACv1_030377_AA0088540,TRIAE_CS42_1AL_TGACv1_000492_AA0013410,TRIAE_CS42_1DL_TGACv1_061176_AA0187850
GO:0046051	UTP metabolic process	biological_process	0.0024002	0.02266	4	2784	14	74606	TRIAE_CS42_4DS_TGACv1_361731_AA1172190,TRIAE_CS42_1AL_TGACv1_000492_AA0013410,TRIAE_CS42_1BL_TGACv1_030377_AA0088540,TRIAE_CS42_1DL_TGACv1_061176_AA0187850
GO:0016417	S-acyltransferase activity	molecular_function	0.0024506	0.023104	10	2784	99	74606	TRIAE_CS42_U_TGACv1_643054_AA2126680,TRIAE_CS42_4AL_TGACv1_292578_AA0999200,TRIAE_CS42_4DS_TGACv1_362069_AA1176360,TRIAE_CS42_6DS_TGACv1_544326_AA1747750,TRIAE_CS42_6AS_TGACv1_486115_AA1557000,TRIAE_CS42_6BS_TGACv1_514091_AA1654910,TRIAE_CS42_7DS_TGACv1_622603_AA2042460,TRIAE_CS42_4BS_TGACv1_330348_AA1107290,TRIAE_CS42_4DL_TGACv1_343777_AA1139610,TRIAE_CS42_4AS_TGACv1_306673_AA1011900
GO:1990391	DNA repair complex	cellular_component	0.0024659	0.023215	4	2784	18	74606	TRIAE_CS42_3B_TGACv1_221965_AA0753990,TRIAE_CS42_1DL_TGACv1_061346_AA0192790,TRIAE_CS42_1AS_TGACv1_019932_AA0072990,TRIAE_CS42_1BS_TGACv1_049394_AA0152000
GO:0016879	ligase activity, forming carbon-nitrogen bonds	molecular_function	0.0025307	0.023792	14	2784	173	74606	TRIAE_CS42_1BL_TGACv1_030654_AA0097000,TRIAE_CS42_4AS_TGACv1_307728_AA1023060,TRIAE_CS42_6DL_TGACv1_527226_AA1700820,TRIAE_CS42_2BS_TGACv1_148632_AA0494200,TRIAE_CS42_2DS_TGACv1_177213_AA0569190,TRIAE_CS42_1DL_TGACv1_061125_AA0186220,TRIAE_CS42_3AL_TGACv1_194109_AA0626660,TRIAE_CS42_5DL_TGACv1_433626_AA1417990,TRIAE_CS42_6BL_TGACv1_500652_AA1608010,TRIAE_CS42_1BL_TGACv1_030850_AA0102280,TRIAE_CS4…
GO:0006085	acetyl-CoA biosynthetic process	biological_process	0.0025923	0.024337	4	2784	18	74606	TRIAE_CS42_2AS_TGACv1_112938_AA0348140,TRIAE_CS42_2BS_TGACv1_148429_AA0492770,TRIAE_CS42_5BL_TGACv1_406279_AA1343630,TRIAE_CS42_5AL_TGACv1_376570_AA1238560
GO:0005856	cytoskeleton	cellular_component	0.002597	0.024348	26	2784	405	74606	TRIAE_CS42_6DS_TGACv1_542706_AA1728340,TRIAE_CS42_1DS_TGACv1_081003_AA0256680,TRIAE_CS42_6AS_TGACv1_486373_AA1560720,TRIAE_CS42_2DS_TGACv1_177373_AA0574960,TRIAE_CS42_3AS_TGACv1_210890_AA0680890,TRIAE_CS42_1AS_TGACv1_019520_AA0067630,TRIAE_CS42_2AS_TGACv1_113582_AA0358210,TRIAE_CS42_1BL_TGACv1_030590_AA0094940,TRIAE_CS42_6BS_TGACv1_513186_AA1633440,TRIAE_CS42_1BS_TGACv1_049965_AA0164830,TRIAE_CS4…
GO:0009505	plant-type cell wall	cellular_component	0.0026324	0.024645	9	2784	83	74606	TRIAE_CS42_U_TGACv1_641240_AA2089370,TRIAE_CS42_3DS_TGACv1_271499_AA0900440,TRIAE_CS42_1BS_TGACv1_049652_AA0158940,TRIAE_CS42_3AS_TGACv1_210640_AA0676180,TRIAE_CS42_2BL_TGACv1_131310_AA0425770,TRIAE_CS42_3DL_TGACv1_251228_AA0879080,TRIAE_CS42_3B_TGACv1_222825_AA0771410,TRIAE_CS42_3B_TGACv1_225154_AA0805530,TRIAE_CS42_1DS_TGACv1_081158_AA0258140
GO:0044877	macromolecular complex binding	molecular_function	0.0026957	0.025203	31	2784	578	74606	TRIAE_CS42_6DS_TGACv1_543529_AA1741250,TRIAE_CS42_3AL_TGACv1_194824_AA0640140,TRIAE_CS42_5AL_TGACv1_374243_AA1194880,TRIAE_CS42_7BS_TGACv1_592050_AA1929210,TRIAE_CS42_2DL_TGACv1_158390_AA0517350,TRIAE_CS42_4BL_TGACv1_321294_AA1058540,TRIAE_CS42_3AL_TGACv1_196532_AA0661150,TRIAE_CS42_4AS_TGACv1_307317_AA1019370,TRIAE_CS42_1BL_TGACv1_030553_AA0093880,TRIAE_CS42_5DL_TGACv1_433822_AA1423010,TRIAE_CS4…
GO:0009743	response to carbohydrate	biological_process	0.0027161	0.025358	8	2784	71	74606	TRIAE_CS42_U_TGACv1_640995_AA2081800,TRIAE_CS42_1AL_TGACv1_001119_AA0025400,TRIAE_CS42_3DL_TGACv1_251082_AA0877230,TRIAE_CS42_7BS_TGACv1_593453_AA1951720,TRIAE_CS42_1DL_TGACv1_061317_AA0192320,TRIAE_CS42_7DS_TGACv1_621370_AA2013200,TRIAE_CS42_7AL_TGACv1_557134_AA1777250,TRIAE_CS42_5DL_TGACv1_434775_AA1441440
GO:0048316	seed development	biological_process	0.0027338	0.025488	23	2784	340	74606	TRIAE_CS42_7DS_TGACv1_621997_AA2030830,TRIAE_CS42_5BL_TGACv1_405128_AA1320750,TRIAE_CS42_U_TGACv1_640757_AA2072670,TRIAE_CS42_1AL_TGACv1_001119_AA0025400,TRIAE_CS42_2AS_TGACv1_112739_AA0344340,TRIAE_CS42_2DL_TGACv1_158851_AA0527100,TRIAE_CS42_3DL_TGACv1_250864_AA0874390,TRIAE_CS42_4DL_TGACv1_345404_AA1153060,TRIAE_CS42_3DL_TGACv1_251216_AA0878910,TRIAE_CS42_7AS_TGACv1_570244_AA1832810,TRIAE_CS42_…
GO:0071806	protein transmembrane transport	biological_process	0.0027622	0.025717	10	2784	88	74606	TRIAE_CS42_6AS_TGACv1_486953_AA1566790,TRIAE_CS42_3AL_TGACv1_194730_AA0638300,TRIAE_CS42_6BS_TGACv1_514140_AA1655890,TRIAE_CS42_4BL_TGACv1_321242_AA1057770,TRIAE_CS42_4DL_TGACv1_343137_AA1130350,TRIAE_CS42_2DL_TGACv1_160210_AA0548190,TRIAE_CS42_4AS_TGACv1_307078_AA1016740,TRIAE_CS42_3B_TGACv1_223093_AA0776380,TRIAE_CS42_3B_TGACv1_223525_AA0783520,TRIAE_CS42_6DS_TGACv1_542697_AA1728230
GO:0004450	isocitrate dehydrogenase (NADP+) activity	molecular_function	0.0027716	0.025769	3	2784	9	74606	TRIAE_CS42_2AL_TGACv1_094054_AA0291710,TRIAE_CS42_2BL_TGACv1_129772_AA0395390,TRIAE_CS42_2DL_TGACv1_159084_AA0532060
GO:0015291	secondary active transmembrane transporter activity	molecular_function	0.0027891	0.025895	27	2784	439	74606	TRIAE_CS42_7AL_TGACv1_557109_AA1776600,TRIAE_CS42_2AL_TGACv1_094766_AA0302860,TRIAE_CS42_2BL_TGACv1_129857_AA0398180,TRIAE_CS42_3B_TGACv1_224979_AA0803850,TRIAE_CS42_5AL_TGACv1_378077_AA1251060,TRIAE_CS42_3DS_TGACv1_272293_AA0918520,TRIAE_CS42_4BS_TGACv1_329699_AA1103360,TRIAE_CS42_3DL_TGACv1_249672_AA0854040,TRIAE_CS42_2BL_TGACv1_129391_AA0381430,TRIAE_CS42_5AL_TGACv1_374188_AA1192880,TRIAE_CS42…
GO:0031957	very long-chain fatty acid-CoA ligase activity	molecular_function	0.0028491	0.026416	2	2784	3	74606	TRIAE_CS42_1AS_TGACv1_019494_AA0067320,TRIAE_CS42_1BS_TGACv1_050462_AA0172420
GO:0006564	L-serine biosynthetic process	biological_process	0.0028927	0.026784	4	2784	17	74606	TRIAE_CS42_U_TGACv1_641020_AA2082360,TRIAE_CS42_7BL_TGACv1_580117_AA1912080,TRIAE_CS42_2BL_TGACv1_130544_AA0413270,TRIAE_CS42_2DL_TGACv1_160628_AA0552420
GO:0004807	triose-phosphate isomerase activity	molecular_function	0.0030206	0.027929	3	2784	8	74606	TRIAE_CS42_3AL_TGACv1_194635_AA0637160,TRIAE_CS42_3DS_TGACv1_271475_AA0899660,TRIAE_CS42_3B_TGACv1_226284_AA0815680
GO:0033926	glycopeptide alpha-N-acetylgalactosaminidase activity	molecular_function	0.0030709	0.028355	4	2784	19	74606	TRIAE_CS42_4BS_TGACv1_327958_AA1079730,TRIAE_CS42_4AL_TGACv1_290432_AA0985380,TRIAE_CS42_2BL_TGACv1_130193_AA0406020,TRIAE_CS42_4DS_TGACv1_361039_AA1159570
GO:0009657	plastid organization	biological_process	0.0030969	0.028556	17	2784	223	74606	TRIAE_CS42_6BL_TGACv1_501995_AA1622110,TRIAE_CS42_5AL_TGACv1_376343_AA1235470,TRIAE_CS42_1DS_TGACv1_082951_AA0265140,TRIAE_CS42_1DL_TGACv1_062818_AA0220440,TRIAE_CS42_7BS_TGACv1_592050_AA1929210,TRIAE_CS42_3DL_TGACv1_249227_AA0842370,TRIAE_CS42_2DS_TGACv1_177169_AA0567350,TRIAE_CS42_6AL_TGACv1_472254_AA1519880,TRIAE_CS42_5AS_TGACv1_393382_AA1272050,TRIAE_CS42_7DS_TGACv1_622168_AA2034390,TRIAE_CS4…
GO:0003688	DNA replication origin binding	molecular_function	0.0031401	0.028915	2	2784	3	74606	TRIAE_CS42_6DL_TGACv1_527835_AA1709090,TRIAE_CS42_6BL_TGACv1_499834_AA1592800
GO:0009415	response to water	biological_process	0.0032016	0.029441	19	2784	238	74606	TRIAE_CS42_2BL_TGACv1_131580_AA0429350,TRIAE_CS42_5DL_TGACv1_434775_AA1441440,TRIAE_CS42_7DS_TGACv1_624347_AA2060690,TRIAE_CS42_1DL_TGACv1_061704_AA0201970,TRIAE_CS42_5DL_TGACv1_436457_AA1461110,TRIAE_CS42_1BS_TGACv1_049680_AA0159500,TRIAE_CS42_3B_TGACv1_221163_AA0732400,TRIAE_CS42_7AL_TGACv1_556972_AA1774460,TRIAE_CS42_7AL_TGACv1_556796_AA1770880,TRIAE_CS42_5DL_TGACv1_434740_AA1440850,TRIAE_CS42…
GO:0019201	nucleotide kinase activity	molecular_function	0.0032367	0.029723	7	2784	50	74606	TRIAE_CS42_7BL_TGACv1_579222_AA1905450,TRIAE_CS42_4DL_TGACv1_343142_AA1130440,TRIAE_CS42_U_TGACv1_642445_AA2117740,TRIAE_CS42_7DL_TGACv1_602656_AA1964250,TRIAE_CS42_5DS_TGACv1_456506_AA1472400,TRIAE_CS42_5BS_TGACv1_424804_AA1391850,TRIAE_CS42_4BL_TGACv1_320339_AA1035830
GO:0016673	oxidoreductase activity, acting on a sulfur group of donors, iron-sulfur protein as acceptor	molecular_function	0.0032981	0.030204	2	2784	3	74606	TRIAE_CS42_1AL_TGACv1_001652_AA0033600,TRIAE_CS42_1DL_TGACv1_061476_AA0196370
GO:0050311	sulfite reductase (ferredoxin) activity	molecular_function	0.0032981	0.030204	2	2784	3	74606	TRIAE_CS42_1DL_TGACv1_061476_AA0196370,TRIAE_CS42_1AL_TGACv1_001652_AA0033600
GO:0030150	protein import into mitochondrial matrix	biological_process	0.0034336	0.031402	5	2784	24	74606	TRIAE_CS42_3B_TGACv1_223093_AA0776380,TRIAE_CS42_4BL_TGACv1_321242_AA1057770,TRIAE_CS42_4DL_TGACv1_343137_AA1130350,TRIAE_CS42_4AS_TGACv1_307078_AA1016740,TRIAE_CS42_3AL_TGACv1_194730_AA0638300
GO:0004489	methylenetetrahydrofolate reductase (NAD(P)H) activity	molecular_function	0.0034517	0.031525	2	2784	3	74606	TRIAE_CS42_5BL_TGACv1_406345_AA1344380,TRIAE_CS42_5AL_TGACv1_374680_AA1206310
GO:0032441	pheophorbide a oxygenase activity	molecular_function	0.0034577	0.031537	2	2784	3	74606	TRIAE_CS42_4DL_TGACv1_343749_AA1139150,TRIAE_CS42_4BL_TGACv1_320729_AA1047290
GO:0003825	alpha,alpha-trehalose-phosphate synthase (UDP-forming) activity	molecular_function	0.0034796	0.031692	2	2784	4	74606	TRIAE_CS42_1AL_TGACv1_001119_AA0025400,TRIAE_CS42_1DL_TGACv1_061317_AA0192320
GO:0019419	sulfate reduction	biological_process	0.0034857	0.031692	2	2784	3	74606	TRIAE_CS42_2BS_TGACv1_145868_AA0447700,TRIAE_CS42_2DS_TGACv1_177565_AA0580190
GO:0008909	isochorismate synthase activity	molecular_function	0.0034936	0.031692	2	2784	3	74606	TRIAE_CS42_5DL_TGACv1_433720_AA1420520,TRIAE_CS42_5AL_TGACv1_378731_AA1254400
GO:0050486	intramolecular transferase activity, transferring hydroxy groups	molecular_function	0.0034936	0.031692	2	2784	3	74606	TRIAE_CS42_5DL_TGACv1_433720_AA1420520,TRIAE_CS42_5AL_TGACv1_378731_AA1254400
GO:0019320	hexose catabolic process	biological_process	0.0035377	0.032049	3	2784	9	74606	TRIAE_CS42_3DL_TGACv1_251020_AA0876220,TRIAE_CS42_3B_TGACv1_222141_AA0758150,TRIAE_CS42_3AL_TGACv1_196039_AA0656760
GO:0000107	imidazoleglycerol-phosphate synthase activity	molecular_function	0.0035613	0.03222	2	2784	3	74606	TRIAE_CS42_4DL_TGACv1_343985_AA1142210,TRIAE_CS42_4AS_TGACv1_306772_AA1013210
GO:0033354	chlorophyll cycle	biological_process	0.0036126	0.032595	2	2784	3	74606	TRIAE_CS42_1AL_TGACv1_000695_AA0017180,TRIAE_CS42_1BL_TGACv1_033227_AA0137910
GO:0090415	7-hydroxymethyl chlorophyll a reductase activity	molecular_function	0.0036126	0.032595	2	2784	3	74606	TRIAE_CS42_1BL_TGACv1_033227_AA0137910,TRIAE_CS42_1AL_TGACv1_000695_AA0017180
GO:0019202	amino acid kinase activity	molecular_function	0.003645	0.032803	4	2784	19	74606	TRIAE_CS42_1AL_TGACv1_000254_AA0007380,TRIAE_CS42_U_TGACv1_641432_AA2094970,TRIAE_CS42_3B_TGACv1_225182_AA0805900,TRIAE_CS42_5BL_TGACv1_404321_AA1295470
GO:0006839	mitochondrial transport	biological_process	0.0036453	0.032803	9	2784	71	74606	TRIAE_CS42_3B_TGACv1_223093_AA0776380,TRIAE_CS42_3B_TGACv1_225872_AA0812520,TRIAE_CS42_3B_TGACv1_223525_AA0783520,TRIAE_CS42_4AS_TGACv1_307078_AA1016740,TRIAE_CS42_3AL_TGACv1_194057_AA0625630,TRIAE_CS42_4BL_TGACv1_321242_AA1057770,TRIAE_CS42_4DL_TGACv1_343137_AA1130350,TRIAE_CS42_2DL_TGACv1_159701_AA0541660,TRIAE_CS42_3AL_TGACv1_194730_AA0638300
GO:0010232	vascular transport	biological_process	0.0036692	0.032884	3	2784	10	74606	TRIAE_CS42_7AL_TGACv1_559693_AA1800520,TRIAE_CS42_7DL_TGACv1_604116_AA1994020,TRIAE_CS42_7BL_TGACv1_577849_AA1884560
GO:0010233	phloem transport	biological_process	0.0036692	0.032884	3	2784	10	74606	TRIAE_CS42_7BL_TGACv1_577849_AA1884560,TRIAE_CS42_7DL_TGACv1_604116_AA1994020,TRIAE_CS42_7AL_TGACv1_559693_AA1800520
GO:0051017	actin filament bundle assembly	biological_process	0.0036739	0.032884	4	2784	23	74606	TRIAE_CS42_4DL_TGACv1_342367_AA1111630,TRIAE_CS42_4AS_TGACv1_307317_AA1019370,TRIAE_CS42_3AL_TGACv1_194824_AA0640140,TRIAE_CS42_3DS_TGACv1_271667_AA0905120
GO:0061572	actin filament bundle organization	biological_process	0.0036739	0.032884	4	2784	23	74606	TRIAE_CS42_4AS_TGACv1_307317_AA1019370,TRIAE_CS42_4DL_TGACv1_342367_AA1111630,TRIAE_CS42_3AL_TGACv1_194824_AA0640140,TRIAE_CS42_3DS_TGACv1_271667_AA0905120
GO:0098655	cation transmembrane transport	biological_process	0.0036822	0.032914	36	2784	628	74606	TRIAE_CS42_7AL_TGACv1_558464_AA1793580,TRIAE_CS42_U_TGACv1_642696_AA2121820,TRIAE_CS42_2AL_TGACv1_094766_AA0302860,TRIAE_CS42_5BL_TGACv1_406546_AA1346870,TRIAE_CS42_2AL_TGACv1_093051_AA0270470,TRIAE_CS42_7DL_TGACv1_603800_AA1989460,TRIAE_CS42_2AL_TGACv1_095324_AA0309650,TRIAE_CS42_6BL_TGACv1_501539_AA1618480,TRIAE_CS42_1AL_TGACv1_004040_AA0052320,TRIAE_CS42_5DL_TGACv1_436184_AA1459030,TRIAE_CS42_…
GO:0008152	metabolic process	biological_process	0.0037065	0.033007	1326	2784	34187	74606	TRIAE_CS42_5BL_TGACv1_404737_AA1309600,TRIAE_CS42_2DL_TGACv1_159162_AA0533640,TRIAE_CS42_7AL_TGACv1_557898_AA1787490,TRIAE_CS42_5BS_TGACv1_423428_AA1376660,TRIAE_CS42_2BL_TGACv1_131224_AA0424610,TRIAE_CS42_2DL_TGACv1_164978_AA0565010,TRIAE_CS42_4AS_TGACv1_308228_AA1026790,TRIAE_CS42_7BL_TGACv1_576904_AA1859360,TRIAE_CS42_2DL_TGACv1_159084_AA0532060,TRIAE_CS42_7AL_TGACv1_556888_AA1772870,TRIAE_CS4…
AA1219100,TRIAE_CS42_3DS_TGACv1_272540_AA0922080,TRIAE_CS42_4AS_TGACv1_307361_AA1019860,TRIAE_CS42_1BL_TGACv1_031443_AA0114190,TRIAE_CS42_1DL_TGACv1_063052_AA0223380,TRIAE_CS42_4DS_TGACv1_361813_AA1173070,TRIAE_CS42_7AS_TGACv1_570040_AA1829250,TRIAE_CS42_2DL_TGACv1_161508_AA0558940,TRIAE_CS42_5AL_TGACv1_373950_AA1185190,TRIAE_CS42_6AS_TGACv1_486605_AA1563110,TRIAE_CS42_U_TGACv1_641174_AA2087390,T…
GO:0009639	response to red or far red light	biological_process	0.0037229	0.033007	9	2784	90	74606	TRIAE_CS42_4AS_TGACv1_306406_AA1007690,TRIAE_CS42_5BL_TGACv1_405701_AA1333330,TRIAE_CS42_4AL_TGACv1_289727_AA0976030,TRIAE_CS42_U_TGACv1_643126_AA2127630,TRIAE_CS42_U_TGACv1_642463_AA2118090,TRIAE_CS42_3DL_TGACv1_251447_AA0881600,TRIAE_CS42_4BL_TGACv1_321702_AA1064290,TRIAE_CS42_5AL_TGACv1_377520_AA1247660,TRIAE_CS42_4DL_TGACv1_343812_AA1140000
GO:0006970	response to osmotic stress	biological_process	0.0037298	0.033007	21	2784	302	74606	TRIAE_CS42_7DS_TGACv1_624347_AA2060690,TRIAE_CS42_7AS_TGACv1_570369_AA1834630,TRIAE_CS42_7AL_TGACv1_558294_AA1792080,TRIAE_CS42_6BL_TGACv1_501995_AA1622110,TRIAE_CS42_2AL_TGACv1_095324_AA0309650,TRIAE_CS42_3B_TGACv1_222825_AA0771410,TRIAE_CS42_7DL_TGACv1_603800_AA1989460,TRIAE_CS42_2DL_TGACv1_158421_AA0518370,TRIAE_CS42_3DS_TGACv1_271499_AA0900440,TRIAE_CS42_U_TGACv1_642463_AA2118090,TRIAE_CS42_3…
GO:0004379	glycylpeptide N-tetradecanoyltransferase activity	molecular_function	0.0037318	0.033007	2	2784	3	74606	TRIAE_CS42_3AL_TGACv1_193675_AA0617390,TRIAE_CS42_3DL_TGACv1_252598_AA0890960
GO:0006498	N-terminal protein lipidation	biological_process	0.0037318	0.033007	2	2784	3	74606	TRIAE_CS42_3DL_TGACv1_252598_AA0890960,TRIAE_CS42_3AL_TGACv1_193675_AA0617390
GO:0006499	N-terminal protein myristoylation	biological_process	0.0037318	0.033007	2	2784	3	74606	TRIAE_CS42_3AL_TGACv1_193675_AA0617390,TRIAE_CS42_3DL_TGACv1_252598_AA0890960
GO:0018377	protein myristoylation	biological_process	0.0037318	0.033007	2	2784	3	74606	TRIAE_CS42_3AL_TGACv1_193675_AA0617390,TRIAE_CS42_3DL_TGACv1_252598_AA0890960
GO:0019107	myristoyltransferase activity	molecular_function	0.0037318	0.033007	2	2784	3	74606	TRIAE_CS42_3DL_TGACv1_252598_AA0890960,TRIAE_CS42_3AL_TGACv1_193675_AA0617390
GO:0009067	aspartate family amino acid biosynthetic process	biological_process	0.003776	0.033354	9	2784	85	74606	TRIAE_CS42_4BL_TGACv1_322214_AA1069720,TRIAE_CS42_5AS_TGACv1_393328_AA1271350,TRIAE_CS42_5DS_TGACv1_456564_AA1474130,TRIAE_CS42_4DL_TGACv1_343385_AA1133850,TRIAE_CS42_4DS_TGACv1_361983_AA1175310,TRIAE_CS42_5BS_TGACv1_423584_AA1379990,TRIAE_CS42_4AL_TGACv1_290117_AA0981910,TRIAE_CS42_7DS_TGACv1_624143_AA2059180,TRIAE_CS42_4BS_TGACv1_330819_AA1108930
GO:0000823	inositol-1,4,5-trisphosphate 6-kinase activity	molecular_function	0.0038487	0.033907	2	2784	3	74606	TRIAE_CS42_7DL_TGACv1_603779_AA1989110,TRIAE_CS42_7AL_TGACv1_556888_AA1772870
GO:0047326	inositol tetrakisphosphate 5-kinase activity	molecular_function	0.0038487	0.033907	2	2784	3	74606	TRIAE_CS42_7AL_TGACv1_556888_AA1772870,TRIAE_CS42_7DL_TGACv1_603779_AA1989110
GO:0008685	2-C-methyl-D-erythritol 2,4-cyclodiphosphate synthase activity	molecular_function	0.0038758	0.034101	2	2784	3	74606	TRIAE_CS42_6DL_TGACv1_527093_AA1698360,TRIAE_CS42_6BL_TGACv1_501657_AA1619680
GO:0005965	protein farnesyltransferase complex	cellular_component	0.0039013	0.034236	2	2784	3	74606	TRIAE_CS42_3B_TGACv1_227076_AA0821300,TRIAE_CS42_U_TGACv1_647071_AA2147380
GO:0018343	protein farnesylation	biological_process	0.0039013	0.034236	2	2784	3	74606	TRIAE_CS42_3B_TGACv1_227076_AA0821300,TRIAE_CS42_U_TGACv1_647071_AA2147380
GO:0042788	polysomal ribosome	cellular_component	0.0039242	0.034392	3	2784	8	74606	TRIAE_CS42_2BL_TGACv1_130381_AA0409970,TRIAE_CS42_2DL_TGACv1_158421_AA0518370,TRIAE_CS42_2AL_TGACv1_095324_AA0309650
GO:1901575	organic substance catabolic process	biological_process	0.0039449	0.0345	94	2784	1931	74606	TRIAE_CS42_5DL_TGACv1_438060_AA1467880,TRIAE_CS42_2AL_TGACv1_094486_AA0298610,TRIAE_CS42_6BL_TGACv1_499968_AA1596160,TRIAE_CS42_3AL_TGACv1_196429_AA0660330,TRIAE_CS42_3DL_TGACv1_251713_AA0884060,TRIAE_CS42_7AS_TGACv1_570937_AA1842720,TRIAE_CS42_3B_TGACv1_223834_AA0788190,TRIAE_CS42_5AS_TGACv1_394202_AA1278730,TRIAE_CS42_3B_TGACv1_221138_AA0731590,TRIAE_CS42_3DL_TGACv1_251216_AA0878910,TRIAE_CS42_…
GO:0004448	isocitrate dehydrogenase activity	molecular_function	0.0039469	0.0345	4	2784	19	74606	TRIAE_CS42_2BL_TGACv1_132202_AA0435990,TRIAE_CS42_2DL_TGACv1_159084_AA0532060,TRIAE_CS42_2BL_TGACv1_129772_AA0395390,TRIAE_CS42_2AL_TGACv1_094054_AA0291710
GO:0016872	intramolecular lyase activity	molecular_function	0.0040214	0.035106	5	2784	28	74606	TRIAE_CS42_4AL_TGACv1_290294_AA0983690,TRIAE_CS42_4BL_TGACv1_320456_AA1039910,TRIAE_CS42_4DL_TGACv1_342557_AA1116570,TRIAE_CS42_2BS_TGACv1_146183_AA0457650,TRIAE_CS42_4AS_TGACv1_307361_AA1019860
GO:0005342	organic acid transmembrane transporter activity	molecular_function	0.0040335	0.03512	10	2784	107	74606	TRIAE_CS42_1DL_TGACv1_062818_AA0220440,TRIAE_CS42_3DS_TGACv1_271874_AA0909920,TRIAE_CS42_5AL_TGACv1_374188_AA1192880,TRIAE_CS42_5DL_TGACv1_432946_AA1395680,TRIAE_CS42_5BL_TGACv1_405907_AA1337450,TRIAE_CS42_3B_TGACv1_223199_AA0777850,TRIAE_CS42_3B_TGACv1_225155_AA0805550,TRIAE_CS42_2BS_TGACv1_146815_AA0473320,TRIAE_CS42_4BL_TGACv1_320288_AA1034040,TRIAE_CS42_4DL_TGACv1_343039_AA1128130
GO:0046943	carboxylic acid transmembrane transporter activity	molecular_function	0.0040335	0.03512	10	2784	107	74606	TRIAE_CS42_4DL_TGACv1_343039_AA1128130,TRIAE_CS42_2BS_TGACv1_146815_AA0473320,TRIAE_CS42_4BL_TGACv1_320288_AA1034040,TRIAE_CS42_5BL_TGACv1_405907_AA1337450,TRIAE_CS42_1DL_TGACv1_062818_AA0220440,TRIAE_CS42_5DL_TGACv1_432946_AA1395680,TRIAE_CS42_3DS_TGACv1_271874_AA0909920,TRIAE_CS42_5AL_TGACv1_374188_AA1192880,TRIAE_CS42_3B_TGACv1_223199_AA0777850,TRIAE_CS42_3B_TGACv1_225155_AA0805550
GO:0009314	response to radiation	biological_process	0.004072	0.03541	26	2784	415	74606	TRIAE_CS42_7AL_TGACv1_557134_AA1777250,TRIAE_CS42_4AS_TGACv1_306406_AA1007690,TRIAE_CS42_U_TGACv1_643126_AA2127630,TRIAE_CS42_3AS_TGACv1_210574_AA0675360,TRIAE_CS42_4AL_TGACv1_289727_AA0976030,TRIAE_CS42_5BL_TGACv1_405701_AA1333330,TRIAE_CS42_4BL_TGACv1_321702_AA1064290,TRIAE_CS42_3B_TGACv1_220956_AA0724960,TRIAE_CS42_1AL_TGACv1_000734_AA0018070,TRIAE_CS42_3DL_TGACv1_251447_AA0881600,TRIAE_CS42_2…
GO:0016627	oxidoreductase activity, acting on the CH-CH group of donors	molecular_function	0.0043598	0.037863	13	2784	154	74606	TRIAE_CS42_6BS_TGACv1_513136_AA1631470,TRIAE_CS42_3DS_TGACv1_273835_AA0933610,TRIAE_CS42_6BL_TGACv1_499919_AA1594770,TRIAE_CS42_4BL_TGACv1_322214_AA1069720,TRIAE_CS42_4DS_TGACv1_362233_AA1177980,TRIAE_CS42_3AL_TGACv1_194203_AA0628440,TRIAE_CS42_2BS_TGACv1_145984_AA0451870,TRIAE_CS42_3B_TGACv1_224606_AA0798680,TRIAE_CS42_2DS_TGACv1_177352_AA0574250,TRIAE_CS42_5DL_TGACv1_434321_AA1433910,TRIAE_CS42…
GO:1901476	carbohydrate transporter activity	molecular_function	0.0043908	0.038084	6	2784	44	74606	TRIAE_CS42_1DL_TGACv1_062818_AA0220440,TRIAE_CS42_2BL_TGACv1_129391_AA0381430,TRIAE_CS42_4DS_TGACv1_361391_AA1166860,TRIAE_CS42_4AL_TGACv1_289623_AA0974220,TRIAE_CS42_U_TGACv1_641184_AA2087580,TRIAE_CS42_4BS_TGACv1_329699_AA1103360
GO:0007030	Golgi organization	biological_process	0.004479	0.038799	4	2784	22	74606	TRIAE_CS42_5DS_TGACv1_458693_AA1494370,TRIAE_CS42_7DL_TGACv1_603800_AA1989460,TRIAE_CS42_7AS_TGACv1_570466_AA1836110,TRIAE_CS42_7AL_TGACv1_558294_AA1792080
GO:0009416	response to light stimulus	biological_process	0.0045524	0.039384	25	2784	395	74606	TRIAE_CS42_3DL_TGACv1_249227_AA0842370,TRIAE_CS42_U_TGACv1_642463_AA2118090,TRIAE_CS42_3DS_TGACv1_272293_AA0918520,TRIAE_CS42_7BS_TGACv1_592026_AA1928570,TRIAE_CS42_1DL_TGACv1_062985_AA0222610,TRIAE_CS42_5AL_TGACv1_377520_AA1247660,TRIAE_CS42_7DS_TGACv1_622043_AA2031500,TRIAE_CS42_4DS_TGACv1_361424_AA1167750,TRIAE_CS42_4BS_TGACv1_330248_AA1106770,TRIAE_CS42_7AS_TGACv1_570369_AA1834630,TRIAE_CS42_…
GO:0009904	chloroplast accumulation movement	biological_process	0.0047157	0.040744	2	2784	5	74606	TRIAE_CS42_U_TGACv1_641465_AA2095940,TRIAE_CS42_7BS_TGACv1_592050_AA1929210
GO:0016491	oxidoreductase activity	molecular_function	0.0047883	0.041228	238	2784	5365	74606	TRIAE_CS42_3DS_TGACv1_271499_AA0900440,TRIAE_CS42_7DL_TGACv1_604284_AA1996190,TRIAE_CS42_3AS_TGACv1_210640_AA0676180,TRIAE_CS42_5DS_TGACv1_458316_AA1493280,TRIAE_CS42_3AL_TGACv1_193894_AA0622060,TRIAE_CS42_3DL_TGACv1_249354_AA0846360,TRIAE_CS42_2BS_TGACv1_145984_AA0451870,TRIAE_CS42_1DL_TGACv1_061214_AA0189100,TRIAE_CS42_3AS_TGACv1_211390_AA0689620,TRIAE_CS42_1DL_TGACv1_061382_AA0193780,TRIAE_CS4…
GO:0035384	thioester biosynthetic process	biological_process	0.0047901	0.041228	4	2784	21	74606	TRIAE_CS42_5BL_TGACv1_406279_AA1343630,TRIAE_CS42_5AL_TGACv1_376570_AA1238560,TRIAE_CS42_2BS_TGACv1_148429_AA0492770,TRIAE_CS42_2AS_TGACv1_112938_AA0348140
GO:0071616	acyl-CoA biosynthetic process	biological_process	0.0047901	0.041228	4	2784	21	74606	TRIAE_CS42_2AS_TGACv1_112938_AA0348140,TRIAE_CS42_2BS_TGACv1_148429_AA0492770,TRIAE_CS42_5AL_TGACv1_376570_AA1238560,TRIAE_CS42_5BL_TGACv1_406279_AA1343630
GO:0006152	purine nucleoside catabolic process	biological_process	0.0048649	0.041765	3	2784	10	74606	TRIAE_CS42_2DL_TGACv1_158777_AA0526010,TRIAE_CS42_2AL_TGACv1_094077_AA0292200,TRIAE_CS42_2AL_TGACv1_094486_AA0298610
GO:0046130	purine ribonucleoside catabolic process	biological_process	0.0048649	0.041765	3	2784	10	74606	TRIAE_CS42_2AL_TGACv1_094486_AA0298610,TRIAE_CS42_2AL_TGACv1_094077_AA0292200,TRIAE_CS42_2DL_TGACv1_158777_AA0526010
GO:0042214	terpene metabolic process	biological_process	0.004893	0.041953	4	2784	20	74606	TRIAE_CS42_2BS_TGACv1_146261_AA0460710,TRIAE_CS42_2AS_TGACv1_112052_AA0328860,TRIAE_CS42_2BS_TGACv1_145984_AA0451870,TRIAE_CS42_2DS_TGACv1_177352_AA0574250
GO:0008236	serine-type peptidase activity	molecular_function	0.0049578	0.0424	37	2784	672	74606	TRIAE_CS42_2BL_TGACv1_129333_AA0379190,TRIAE_CS42_4DL_TGACv1_345316_AA1152690,TRIAE_CS42_1AL_TGACv1_001923_AA0036820,TRIAE_CS42_5BL_TGACv1_407350_AA1356070,TRIAE_CS42_4BL_TGACv1_321595_AA1062700,TRIAE_CS42_3DL_TGACv1_251312_AA0880040,TRIAE_CS42_7DL_TGACv1_603973_AA1991860,TRIAE_CS42_1DL_TGACv1_062429_AA0214370,TRIAE_CS42_2AL_TGACv1_096183_AA0317660,TRIAE_CS42_5BL_TGACv1_406050_AA1339840,TRIAE_CS4…
GO:0017171	serine hydrolase activity	molecular_function	0.0049578	0.0424	37	2784	672	74606	TRIAE_CS42_2AL_TGACv1_096183_AA0317660,TRIAE_CS42_5BL_TGACv1_406050_AA1339840,TRIAE_CS42_7BS_TGACv1_592328_AA1935700,TRIAE_CS42_4AS_TGACv1_306257_AA1005205,TRIAE_CS42_7BL_TGACv1_579466_AA1907580,TRIAE_CS42_1AL_TGACv1_000756_AA0018510,TRIAE_CS42_5AL_TGACv1_373983_AA1186400,TRIAE_CS42_3AS_TGACv1_213113_AA0705420,TRIAE_CS42_4BL_TGACv1_321595_AA1062700,TRIAE_CS42_1AL_TGACv1_001923_AA0036820,TRIAE_CS4…
GO:0016829	lyase activity	molecular_function	0.0050035	0.042736	51	2784	940	74606	TRIAE_CS42_3AS_TGACv1_211026_AA0683390,TRIAE_CS42_5DL_TGACv1_433836_AA1423410,TRIAE_CS42_3DL_TGACv1_253234_AA0893850,TRIAE_CS42_7BS_TGACv1_592026_AA1928570,TRIAE_CS42_4AS_TGACv1_306772_AA1013210,TRIAE_CS42_3B_TGACv1_221609_AA0745810,TRIAE_CS42_1BL_TGACv1_032711_AA0133270,TRIAE_CS42_3B_TGACv1_222610_AA0767770,TRIAE_CS42_2DL_TGACv1_158004_AA0505620,TRIAE_CS42_3DL_TGACv1_250475_AA0868810,TRIAE_CS42_…
GO:0006782	protoporphyrinogen IX biosynthetic process	biological_process	0.005048	0.043007	4	2784	21	74606	TRIAE_CS42_4AS_TGACv1_306569_AA1010320,TRIAE_CS42_4DL_TGACv1_345711_AA1154220,TRIAE_CS42_1BS_TGACv1_050930_AA0176780,TRIAE_CS42_1DS_TGACv1_082196_AA0264140
GO:0046501	protoporphyrinogen IX metabolic process	biological_process	0.005048	0.043007	4	2784	21	74606	TRIAE_CS42_1DS_TGACv1_082196_AA0264140,TRIAE_CS42_1BS_TGACv1_050930_AA0176780,TRIAE_CS42_4DL_TGACv1_345711_AA1154220,TRIAE_CS42_4AS_TGACv1_306569_AA1010320
GO:0005388	calcium-transporting ATPase activity	molecular_function	0.0051069	0.043454	4	2784	32	74606	TRIAE_CS42_2BL_TGACv1_129973_AA0400750,TRIAE_CS42_4AL_TGACv1_288269_AA0942920,TRIAE_CS42_2AL_TGACv1_093051_AA0270470,TRIAE_CS42_2DL_TGACv1_159040_AA0531140
GO:0002020	protease binding	molecular_function	0.0052834	0.044899	2	2784	4	74606	TRIAE_CS42_7AL_TGACv1_558294_AA1792080,TRIAE_CS42_7DL_TGACv1_603800_AA1989460
GO:0072523	purine-containing compound catabolic process	biological_process	0.0053281	0.045222	4	2784	20	74606	TRIAE_CS42_3B_TGACv1_224491_AA0797170,TRIAE_CS42_2AL_TGACv1_094077_AA0292200,TRIAE_CS42_2DL_TGACv1_158777_AA0526010,TRIAE_CS42_2AL_TGACv1_094486_AA0298610
GO:0010114	response to red light	biological_process	0.0053589	0.045426	4	2784	21	74606	TRIAE_CS42_4BL_TGACv1_321702_AA1064290,TRIAE_CS42_4AS_TGACv1_306406_AA1007690,TRIAE_CS42_4DL_TGACv1_343812_AA1140000,TRIAE_CS42_4AL_TGACv1_289727_AA0976030
GO:0043647	inositol phosphate metabolic process	biological_process	0.0054135	0.04583	5	2784	31	74606	TRIAE_CS42_7DS_TGACv1_621640_AA2021920,TRIAE_CS42_7AL_TGACv1_556888_AA1772870,TRIAE_CS42_4AL_TGACv1_288528_AA0951160,TRIAE_CS42_7DL_TGACv1_603779_AA1989110,TRIAE_CS42_5AL_TGACv1_376140_AA1232710
GO:0008514	organic anion transmembrane transporter activity	molecular_function	0.0056705	0.047808	11	2784	129	74606	TRIAE_CS42_3B_TGACv1_223199_AA0777850,TRIAE_CS42_3B_TGACv1_225155_AA0805550,TRIAE_CS42_5BL_TGACv1_405907_AA1337450,TRIAE_CS42_1DL_TGACv1_062818_AA0220440,TRIAE_CS42_3DS_TGACv1_271874_AA0909920,TRIAE_CS42_5AL_TGACv1_374188_AA1192880,TRIAE_CS42_5DL_TGACv1_432946_AA1395680,TRIAE_CS42_U_TGACv1_644844_AA2141960,TRIAE_CS42_4DL_TGACv1_343039_AA1128130,TRIAE_CS42_2BS_TGACv1_146815_AA0473320,TRIAE_CS42_4B…
GO:0051765	inositol tetrakisphosphate kinase activity	molecular_function	0.0056858	0.047808	4	2784	20	74606	TRIAE_CS42_7AL_TGACv1_556888_AA1772870,TRIAE_CS42_7DS_TGACv1_621640_AA2021920,TRIAE_CS42_5AL_TGACv1_376140_AA1232710,TRIAE_CS42_7DL_TGACv1_603779_AA1989110
GO:0051766	inositol trisphosphate kinase activity	molecular_function	0.0056858	0.047808	4	2784	20	74606	TRIAE_CS42_5AL_TGACv1_376140_AA1232710,TRIAE_CS42_7DL_TGACv1_603779_AA1989110,TRIAE_CS42_7DS_TGACv1_621640_AA2021920,TRIAE_CS42_7AL_TGACv1_556888_AA1772870
GO:0003999	adenine phosphoribosyltransferase activity	molecular_function	0.005704	0.047808	3	2784	9	74606	TRIAE_CS42_6AL_TGACv1_472192_AA1519000,TRIAE_CS42_6BL_TGACv1_499716_AA1589820,TRIAE_CS42_6DL_TGACv1_528171_AA1712170
GO:0006168	adenine salvage	biological_process	0.005704	0.047808	3	2784	9	74606	TRIAE_CS42_6AL_TGACv1_472192_AA1519000,TRIAE_CS42_6BL_TGACv1_499716_AA1589820,TRIAE_CS42_6DL_TGACv1_528171_AA1712170
GO:0043096	purine nucleobase salvage	biological_process	0.005704	0.047808	3	2784	9	74606	TRIAE_CS42_6DL_TGACv1_528171_AA1712170,TRIAE_CS42_6AL_TGACv1_472192_AA1519000,TRIAE_CS42_6BL_TGACv1_499716_AA1589820
GO:0046083	adenine metabolic process	biological_process	0.005704	0.047808	3	2784	9	74606	TRIAE_CS42_6AL_TGACv1_472192_AA1519000,TRIAE_CS42_6BL_TGACv1_499716_AA1589820,TRIAE_CS42_6DL_TGACv1_528171_AA1712170
GO:0046084	adenine biosynthetic process	biological_process	0.005704	0.047808	3	2784	9	74606	TRIAE_CS42_6DL_TGACv1_528171_AA1712170,TRIAE_CS42_6BL_TGACv1_499716_AA1589820,TRIAE_CS42_6AL_TGACv1_472192_AA1519000
GO:0006102	isocitrate metabolic process	biological_process	0.005733	0.047991	3	2784	12	74606	TRIAE_CS42_2BL_TGACv1_129772_AA0395390,TRIAE_CS42_2AL_TGACv1_094054_AA0291710,TRIAE_CS42_2DL_TGACv1_159084_AA0532060
GO:0006637	acyl-CoA metabolic process	biological_process	0.0057505	0.048018	5	2784	34	74606	TRIAE_CS42_2BS_TGACv1_148429_AA0492770,TRIAE_CS42_5AL_TGACv1_376570_AA1238560,TRIAE_CS42_5BL_TGACv1_406279_AA1343630,TRIAE_CS42_2BL_TGACv1_131425_AA0427540,TRIAE_CS42_2AS_TGACv1_112938_AA0348140
GO:0035383	thioester metabolic process	biological_process	0.0057505	0.048018	5	2784	34	74606	TRIAE_CS42_5AL_TGACv1_376570_AA1238560,TRIAE_CS42_5BL_TGACv1_406279_AA1343630,TRIAE_CS42_2BS_TGACv1_148429_AA0492770,TRIAE_CS42_2AS_TGACv1_112938_AA0348140,TRIAE_CS42_2BL_TGACv1_131425_AA0427540
GO:0003774	motor activity	molecular_function	0.0057696	0.04809	13	2784	211	74606	TRIAE_CS42_U_TGACv1_644185_AA2137880,TRIAE_CS42_6DS_TGACv1_543809_AA1744320,TRIAE_CS42_5BL_TGACv1_405531_AA1329570,TRIAE_CS42_3AS_TGACv1_210890_AA0680890,TRIAE_CS42_2BS_TGACv1_147476_AA0483590,TRIAE_CS42_4BL_TGACv1_321294_AA1058540,TRIAE_CS42_2DL_TGACv1_158390_AA0517350,TRIAE_CS42_3DS_TGACv1_271717_AA0906460,TRIAE_CS42_U_TGACv1_641465_AA2095940,TRIAE_CS42_2DL_TGACv1_159064_AA0531650,TRIAE_CS42_7B…
GO:0002949	tRNA threonylcarbamoyladenosine modification	biological_process	0.0057805	0.04809	3	2784	11	74606	TRIAE_CS42_5AS_TGACv1_394409_AA1280200,TRIAE_CS42_3B_TGACv1_223452_AA0782450,TRIAE_CS42_5BS_TGACv1_424669_AA1391210
GO:0070525	tRNA threonylcarbamoyladenosine metabolic process	biological_process	0.0057805	0.04809	3	2784	11	74606	TRIAE_CS42_3B_TGACv1_223452_AA0782450,TRIAE_CS42_5BS_TGACv1_424669_AA1391210,TRIAE_CS42_5AS_TGACv1_394409_AA1280200
GO:0031369	translation initiation factor binding	molecular_function	0.0059649	0.049528	3	2784	13	74606	TRIAE_CS42_5DL_TGACv1_435150_AA1446750,TRIAE_CS42_5AL_TGACv1_374249_AA1195140,TRIAE_CS42_5BL_TGACv1_404980_AA1317000
GO:0016832	aldehyde-lyase activity	molecular_function	0.0059681	0.049528	5	2784	30	74606	TRIAE_CS42_3DL_TGACv1_251713_AA0884060,TRIAE_CS42_3B_TGACv1_221609_AA0745810,TRIAE_CS42_3AL_TGACv1_196429_AA0660330,TRIAE_CS42_3DL_TGACv1_250475_AA0868810,TRIAE_CS42_7AS_TGACv1_571185_AA1845550
GO:0000930	gamma-tubulin complex	cellular_component	0.0060196	0.049894	3	2784	10	74606	TRIAE_CS42_1AS_TGACv1_019520_AA0067630,TRIAE_CS42_1DS_TGACv1_081003_AA0256680,TRIAE_CS42_1BL_TGACv1_030590_AA0094940
