# Supplementary material for: Impact of Heat Stress on Expression of Wheat Genes Responsive to Hessian Fly Infestation
Source: Plants (Basel). 2022 May 25;11(11):1402. doi: 10.3390/plants11111402 (PMC9183101; doi:10.3390/plants11111402)
Supplement: Supplementary file 1 [file plants-11-01402-s001.zip › Table S5.pdf]

**Table S5.** Kegg pathways significantly enriched by heat stress and the combination of heat stress and HF infestation, respectively ( $q < 0.05$ ).

| Term                                                                                               | ID       | Input number | Background number | q-value    |
|----------------------------------------------------------------------------------------------------|----------|--------------|-------------------|------------|
| <b>Pathways up enriched by heat stress (Heat vs CK )</b>                                           |          |              |                   |            |
| Protein processing in endoplasmic reticulum                                                        | osa04141 | 70           | 203               | 2.77E-22   |
| Galactose metabolism                                                                               | osa00052 | 20           | 54                | 1.47E-06   |
| Spliceosome                                                                                        | osa03040 | 34           | 196               | 0.000184   |
| Glycosphingolipid biosynthesis - globo series                                                      | osa00603 | 6            | 8                 | 0.003251   |
| Basal transcription factors                                                                        | osa03022 | 10           | 41                | 0.026583   |
| <b>Pathways down enriched by heat stress (Heat vs CK)</b>                                          |          |              |                   |            |
| Carbon metabolism                                                                                  | osa01200 | 73           | 225               | 0.038981   |
| Citrate cycle (TCA cycle)                                                                          | osa00020 | 25           | 50                | 0.017641   |
| Pyruvate metabolism                                                                                | osa00620 | 33           | 75                | 0.017641   |
| Fatty acid metabolism                                                                              | osa01212 | 33           | 72                | 0.01433    |
| Fatty acid biosynthesis                                                                            | osa00061 | 25           | 40                | 0.0025     |
| Biosynthesis of secondary metabolites                                                              | osa01110 | 213          | 779               | 0.037688   |
| Biosynthesis of amino acids                                                                        | osa01230 | 84           | 207               | 0.000409   |
| Cysteine and methionine metabolism                                                                 | osa00270 | 43           | 85                | 0.001003   |
| Biotin metabolism                                                                                  | osa00780 | 17           | 20                | 0.0025     |
| <b>Pathways up enriched by the combination of heat stress and HF infestation (HF+Heat vs CK)</b>   |          |              |                   |            |
| Protein processing in endoplasmic reticulum                                                        | osa04141 | 75           | 203               | 7.12E-12   |
| Galactose metabolism                                                                               | osa00052 | 22           | 54                | 0.00080706 |
| Glutathione metabolism                                                                             | osa00480 | 25           | 80                | 0.00528206 |
| Phenylpropanoid biosynthesis                                                                       | osa00940 | 32           | 125               | 0.01135889 |
| Phenylalanine metabolism                                                                           | osa00360 | 26           | 99                | 0.02207683 |
| Stilbenoid, diarylheptanoid and gingerol biosynthesis                                              | osa00945 | 9            | 18                | 0.03074527 |
| Basal transcription factors                                                                        | osa03022 | 14           | 41                | 0.03157745 |
| Glycosphingolipid biosynthesis - globo series                                                      | osa00603 | 6            | 8                 | 0.03218391 |
| Starch and sucrose metabolism                                                                      | osa00500 | 32           | 145               | 0.0397822  |
| <b>Pathways down enriched by the combination of heat stress and HF infestation (HF+Heat vs CK)</b> |          |              |                   |            |
| Pyruvate metabolism                                                                                | osa00620 | 57           | 75                | 0.00011171 |
| Fatty acid metabolism                                                                              | osa01212 | 53           | 72                | 0.00018849 |
| Biosynthesis of amino acids                                                                        | osa01230 | 112          | 207               | 0.00018849 |
| Carbon metabolism                                                                                  | osa01200 | 118          | 225               | 0.00020306 |
| Citrate cycle (TCA cycle)                                                                          | osa00020 | 41           | 50                | 0.00020306 |
| Glycolysis / Gluconeogenesis                                                                       | osa00010 | 71           | 119               | 0.00050205 |
| DNA replication                                                                                    | osa03030 | 34           | 54                | 0.02583402 |
| Cysteine and methionine metabolism                                                                 | osa00270 | 47           | 85                | 0.02611459 |
