# Supplementary material for: Impact of Heat Stress on Expression of Wheat Genes Responsive to Hessian Fly Infestation
Source: Plants (Basel). 2022 May 25;11(11):1402. doi: 10.3390/plants11111402 (PMC9183101; doi:10.3390/plants11111402)
Supplement: Supplementary file 1 [file plants-11-01402-s001.zip › Table S6.pdf]

**Table S6.** DEGs upregulated by HF infestation under normal temperature and fold changes in transcript abundance of these genes due to HF infestation (HF vs CK), heat stress (Heat vs CK), the combination of heat stress and HF infestation (HF+Heat vs CK), and heat stress in the HF infested plants (HF+Heat vs HF).

| Gene Id <sup>a</sup>                                                                                         | Gene description                              | HF vs CK                   | Heat vs CK      | HF+Heat vs CK | HF+Heat vs HF |
|--------------------------------------------------------------------------------------------------------------|-----------------------------------------------|----------------------------|-----------------|---------------|---------------|
| <b>I. Genes uniquely upregulated by HF infestation but not responsive to heat stress</b>                     |                                               |                            |                 |               |               |
| 7AL_v1_556139_AA1756710                                                                                      | Translation initiation factor IF-2            | Inf (18.64/0) <sup>b</sup> | ns <sup>c</sup> | 15.6          | ns            |
| 5BL_v1_408228_AA1362380                                                                                      | Phenylalanine ammonia lyase                   | Inf (14.0/0)               | ns              | ns            | ns            |
| 1DS_v1_080107_AA0239340                                                                                      | Phenylalanine ammonia lyase                   | Inf (36.2/0)               | ns              | Inf (19/0)    | ns            |
| 2AL_v1_109444_AA0328580                                                                                      | Pathogenesis-related protein 1                | Inf (14.8/0)               | ns              | ns            | ns            |
| 2AL_v1_094607_AA0300380                                                                                      | Pathogenesis-related protein 1                | Inf (22.4/0)               | ns              | ns            | ns            |
| 5AL_v1_379331_AA1256080                                                                                      | Jasmonate ZIM domain-containing protein (JAZ) | 5.9                        | ns              | ns            | ns            |
| 4BL_v1_320705_AA1046770                                                                                      | Xyloglucan hydrolase protein 31               | 6.0                        | ns              | ns            | ns            |
| 2AL_v1_094147_AA0293320                                                                                      | Chitinase IV precursor                        | 49.9                       | ns              | 24.5          | ns            |
| 1AL_v1_003726_AA0051220                                                                                      | CASP-like protein                             | Inf (16.9/0)               | ns              | Inf (8/0)     | ns            |
| <b>II. Genes upregulated by both HF infestation and heat stress</b>                                          |                                               |                            |                 |               |               |
| 2BS_v1_146256_AA0460570                                                                                      | Peroxidase                                    | Inf (48.3/0)               | Inf (15.7 /0)   | ns            | ns            |
| 2DS_v1_177965_AA0588260                                                                                      | Dirigent protein                              | 19.03                      | 24.9            | 37.1          | ns            |
| 3B_T1_221042_AA0728000                                                                                       | No hit                                        | 11.54                      | 5.9             | 12.7          | ns            |
| <b>III. Genes up-regulated by HF infestation but down-regulated by heat stress in the HF infested plants</b> |                                               |                            |                 |               |               |
| 1BS_v1_049914_AA0164150                                                                                      | Phenylalanine ammonia lyase                   | Inf (41.9/0)               | ns              | ns            | 0.006         |
| 1DL_v1_061484_AA0196620                                                                                      | RmlC-like cupins superfamily protein          | 5.8                        | ns              | ns            | 0.281         |
| 3AS_v1_213275_AA0706340                                                                                      | 17.2 kDa heat shock protein                   | 8.4                        | ns              | ns            | 0.349         |
| 7DL_v1_603712_AA1987770                                                                                      | Aspartyl protease family protein              | 18.0                       | ns              | ns            | 0.056         |
| 7DS_v1_622332_AA2037800                                                                                      | Carboxylesterase                              | Inf (28.9/0)               | ns              | ns            | 0.049         |
| 1DL_v1_061987_AA0206950                                                                                      | Glucan endo-1,3-beta-glucosidase              | 43.3                       | ns              | 16.0          | 0.412         |

<sup>a</sup>: the prefix of gene ID triae\_cs42\_4dl\_tgacv1is the same for all genes and omitted.

<sup>b</sup>: Inf: fold changes are infinite because of the expression of the gene was not detected in the control plants (CK); expressed as the normalized read count/0.

<sup>c</sup>: ns: Not significant statistically at  $q \leq 0.05$ .
