# Supplementary material for: Impact of Heat Stress on Expression of Wheat Genes Responsive to Hessian Fly Infestation
Source: Plants (Basel). 2022 May 25;11(11):1402. doi: 10.3390/plants11111402 (PMC9183101; doi:10.3390/plants11111402)
Supplement: Supplementary file 1 [file plants-11-01402-s001.zip › Table S7.pdf]

**Table S7.** Fold change in transcript abundance caused by heat stress (Heat vs CK) and the combination of heat stress and HF infestation (HF+Heat vs CK) on genes that are regulated by HF infestation in heat stressed plants (HF+Heat vs Heat).

| Gene ID <sup>a</sup>                                                                                                           | Gene description                                         | HF+Heat vs Heat | Heat vs CK                | HF+Heat vs CK   |
|--------------------------------------------------------------------------------------------------------------------------------|----------------------------------------------------------|-----------------|---------------------------|-----------------|
| <b>Group A: Genes downregulated by HF but upregulated by heat stress and the combination of heat stress and HF infestation</b> |                                                          |                 |                           |                 |
| 3as_tgacv1_210681_aa0677000                                                                                                    | 16.9 kDa class I heat shock protein 1-like               | 0.214           | Inf (45.9/0) <sup>b</sup> | Inf (10/0)      |
| 4dl_tgacv1_342934_aa1125640                                                                                                    | 17.9 kDa class I heat shock protein                      | 0.164           | 171.4                     | 28.1            |
| 5bl_tgacv1_404396_aa1298380                                                                                                    | 16.9 kDa class I heat shock protein 1-like               | 0.325           | 186.7                     | 61.3            |
| 7as_tgacv1_571537_aa1848440                                                                                                    | ATP-dependent zinc metalloprotease FTSH 6, chloroplastic | 0.255           | 174.2                     | 45.0            |
| <b>Group B: Genes upregulated by HF but downregulated by heat stress under control temperature</b>                             |                                                          |                 |                           |                 |
| 5al_tgacv1_373966_aa1185670                                                                                                    | WRKY transcription factor WRKY76-like                    | 246.4           | 0.023                     | 5.8             |
| 5bl_tgacv1_407645_aa1358580                                                                                                    | WRKY transcription factor WRKY76                         | 155.1           | 0.037                     | 5.8             |
| 5dl_tgacv1_436840_aa1463530                                                                                                    | WRKY transcription factor WRKY76                         | 104.4           | 0.086                     | 8.9             |
| 5dl_tgacv1_432937_aa1395210                                                                                                    | WRKY transcription factor WRKY76                         | 137.7           | 0.015                     | ns <sup>c</sup> |
| 2dl_tgacv1_158819_aa0526620                                                                                                    | putative WRKY transcription factor 70                    | 14.9            | 0.152                     | ns              |
| 5al_tgacv1_376168_aa1233160                                                                                                    | putative WRKY transcription factor 58                    | 20.7            | 0.098                     | ns              |
| 1bl_tgacv1_034437_aa0144510                                                                                                    | NRR repressor homolog 1                                  | 23.8            | 0.063                     | ns              |
| 2al_tgacv1_093272_aa0276390                                                                                                    | DMR6-LIKE OXYGENASE 1 (flavonoids metabolism)            | 30.2            | 0.051                     | ns              |
| 2ds_tgacv1_177854_aa0586060                                                                                                    | dirigent protein 21-like                                 | 14.0            | 0.172                     | ns              |
| 7ds_tgacv1_621992_aa2030750                                                                                                    | hessian fly response gene 1 protein                      | 23.4            | 0.093                     | ns              |
| 2ds_tgacv1_177565_aa0580190                                                                                                    | probable 5'-adenylylsulfate reductase 1, chloroplastic   | 2.9             | 0.151                     | 0.436           |
| <b>Group C: Genes upregulated by HF, heat stress, and the combination of heat stress and HF infestation, respectively</b>      |                                                          |                 |                           |                 |
| 6bl_tgacv1_502794_aa1626450                                                                                                    | putative 12-oxophytodienoate reductase 11                | 3.7             | 55.3                      | 204.2           |
| 6dl_tgacv1_527350_aa1702600                                                                                                    | putative 12-oxophytodienoate reductase 11                | 4.3             | 24.3                      | 104.7           |
| 4as_tgacv1_307326_aa1019500                                                                                                    | UDP-glycosyltransferase 83A1                             | 4.3             | 18.9                      | 81.6            |
| 4dl_tgacv1_343563_aa1136610                                                                                                    | UDP-glycosyltransferase 83A1                             | 3.5             | 25.9                      | 90.3            |
| 5al_tgacv1_374195_aa1193180                                                                                                    | lysine-specific demethylase JM30 isoform X1              | 3.4             | 3.3                       | 11.5            |
| 5bl_tgacv1_404509_aa1302530                                                                                                    | lysine-specific demethylase JM30 isoform X2              | 2.8             | 3.2                       | 9.0             |
| 5dl_tgacv1_435238_aa1447590                                                                                                    | lysine-specific demethylase JM30 isoform X1              | 3.0             | 4.1                       | 12.3            |
| 7bs_tgacv1_592357_aa1936350                                                                                                    | lysine-specific demethylase JM30-like isoform X2         | 3.0             | 7.9                       | 24.2            |
| 7ds_tgacv1_624042_aa2058470                                                                                                    | lysine-specific demethylase JM30-like isoform X1         | 2.6             | 11.1                      | 29.4            |
| 4bs_tgacv1_329179_aa1098640                                                                                                    | probable E3 ubiquitin-protein ligase ARI1                | 3.0             | 11.0                      | 33.2            |

<sup>a</sup>: the prefix of gene ID triae\_cs42\_4dl\_tgacv1 is the same for all genes and omitted.

<sup>b</sup>: Inf: fold changes are infinite because of the expression of the gene was not detected in the control plants (CK); expressed as the normalized read counts/0.

<sup>c</sup>: ns: Not significant statistically at  $q \leq 0.05$ .
